# Supplementary material for: Comprehensive search for topological materials using symmetry indicators
Source: Springer Nature journal article supplement (doi:10.1038/s41586-019-0937-5), 2019-02-01
Supplement: 41586_2019_937_MOESM1_ESM.pdf [file 41586_2019_937_MOESM1_ESM.pdf]

In the format provided by the authors and unedited.

# Comprehensive search for topological materials using symmetry indicators

Feng Tang<sup>1,2</sup>, Hoi Chun Po<sup>3,4</sup>, Ashvin Vishwanath<sup>3</sup> & Xiangang Wan<sup>1,2\*</sup>

---

<sup>1</sup>National Laboratory of Solid State Microstructures and School of Physics, Nanjing University, Nanjing, China. <sup>2</sup>Collaborative Innovation Center of Advanced Microstructures, Nanjing University, Nanjing, China. <sup>3</sup>Department of Physics, Harvard University, Cambridge, MA, USA. <sup>4</sup>Department of Physics, Massachusetts Institute of Technology, Cambridge, MA, USA. \*e-mail: [xgwan@nju.edu.cn](mailto:xgwan@nju.edu.cn)

# Supplementary Information For “Comprehensive search for topological materials using symmetry indicators”

Feng Tang,<sup>1,2</sup> Hoi Chun Po,<sup>3,4</sup> Ashvin Vishwanath,<sup>3</sup> and Xiangang Wan<sup>1,2,\*</sup>

<sup>1</sup>*National Laboratory of Solid State Microstructures and School of Physics, Nanjing University, Nanjing 210093, China*

<sup>2</sup>*Collaborative Innovation Center of Advanced Microstructures, Nanjing University, Nanjing 210093, China*

<sup>3</sup>*Department of Physics, Harvard University, Cambridge, MA 02138, USA*

<sup>4</sup>*Department of Physics, Massachusetts Institute of Technology, Cambridge, MA 02139, USA*

## CONTENTS

|                                                                                 |     |
|---------------------------------------------------------------------------------|-----|
| I. Efficient topological materials screening                                    | 0   |
| II. Towards ideal topological insulators and topological crystalline insulators | 2   |
| III. Topological (semi-)metals                                                  | 5   |
| IV. All of the predicted topological materials                                  | 9   |
| V. AI basis vectors for 230 space groups                                        | 53  |
| VI. Website for band structures                                                 | 146 |
| References                                                                      | 146 |

## I. EFFICIENT TOPOLOGICAL MATERIALS SCREENING

Our method of topological materials is based on the symmetry indicators [1], and it is highly efficient as we only need to calculate an expansion with respect to the atomic insulator basis (AIB). The 230 AIBs are explicitly shown for the 230 space groups ( $\mathcal{SG}s$ ) in Sec. V of this supplementary material. As shown in Sec. V, each group owns a fixed number ( $d_{\text{AI}}$ ) of AIB vectors (denoted as  $a_i$ ) which are all integer-valued and may have a common factor (CF). We denote the CF of  $a_i$  by  $C_i$ . For the meaning of each row,  $\nu$  is the total number of the bands and  $n_{\mathbf{k},i}$  is the number of occurrences for the  $i$ th irreducible representation of the symmetry group of the high symmetry point  $\mathbf{k}$ . We arrange the AIB vectors, i.e.,  $a_1, a_2, \dots$  in the order of ascending CFs. The last AIB vector with the largest CF is the so-called strong AIB vector. In *ab initio* calculations, we only need to use the eigen-states at all the high symmetry points, and obtain  $n_{\mathbf{k},i}$  for the  $\nu_e$  bands ( $\nu_e$  is the total number of the valence electrons in the primitive unit cell). We thus obtain a vector  $\mathbf{n} = (\nu_e, n_{\mathbf{k}_1,1}, n_{\mathbf{k}_1,2}, \dots, n_{\mathbf{k}_2,1}, \dots)^\top$  and then we only need to compute a collection of expansion coefficients  $q_i$  [2]:

$$\mathbf{n} = \sum_i q_i a_i \equiv Aq \Rightarrow q = A^{-1}\mathbf{n}, \quad (1)$$

where the  $i$  column of  $A$  is just  $a_i$ , and  $A^{-1}$  denotes the pseudo-inverse of  $A$ . The topological property of the material can be diagnosed simply by inspecting the coefficients  $q_i$ . There are three cases: (1)  $q_i$  are all integers, implying the material could be an atomic insulator; (2) some  $q_i$  are fractions while  $q_i C_i$  are all integers, which implies all compatibility relations are satisfied and a continuous gap could be found at all high-symmetry points, lines, and planes; (3) Neither (1) nor (2) is true, which means there must be a band degeneracy at some high-symmetry points or lines.

Case (2) is the relevant case for the search of insulating topological materials. The possible sub-cases are:

---

\* The corresponding author: xgwan@nju.edu.cn

- (i) for centrosymmetric  $\mathcal{SG}s$ , let  $C_s$  be the largest CF and  $q_s$  be the expansion coefficient with respect to the corresponding AIB. Then if  $q_s C_s \bmod C_s$  is an odd number, we obtain a (strong) topological insulator (TI). Otherwise, we obtain a topological crystalline insulator (TCI);
- (ii) for  $S_4$  symmetric noncentrosymmetric  $\mathcal{SG}s$  one finds  $C_s = 2$ . For case 2,  $q_s C_s \bmod 2$  must be 1, which corresponds to a strong TI if it is not a Weyl semimetal (WSM);
- (iii) for  $C_3$  and mirror symmetric noncentrosymmetric  $\mathcal{SG}s$  with  $C_s = 3$ ,  $q_s C_s \bmod 3 = 1$  or  $2$  corresponds to a mirror Chern, strong and/ or a weak topological insulator if it is not a WSM.

Thus, from the CFs, we can assign an Abelian group  $X_{BS} = \mathbb{Z}_j \times \mathbb{Z}_{j+1} \times \dots \times \mathbb{Z}_{d_{AI}}$  where  $j$  denotes the first AIB vector whose CF is larger than 1. We use the results of  $r_m = q_m C_m \bmod C_m$  as the value in the factor group  $\mathbb{Z}_m$  where  $m = j, j+1, \dots, d_{AI}$ . They are written in the form of  $(r_j, r_{j+1}, \dots, r_{d_{AI}})$  which is called SI and can be used as a fast diagnosis of topological materials.

Note that, while a nonzero SI guarantees the existence of nontrivial band topology, generally it does not uniquely determine the precise topological phase of the system [1, 3]. Nonetheless, for almost all cases one can distinguish between a strong TI and a TCI using only the SI. The only exception to this concerns noncentrosymmetric  $\mathcal{SG}s$  with both a mirror together with a  $C_3$  rotation about the axis normal to the mirror plane (i.e., the  $\mathcal{SG}$  contains  $\bar{6}$  rotoinversion, but not  $C_6$  rotation), as we discussed above in the sub-case (iii) of case (2). Here is a complete list of such  $\mathcal{SG}s$ : **174**, **187**, **188**, **189**, and **190**. For these  $\mathcal{SG}s$ , materials listed in the table of TCIs might in fact be a strong TI. As an example, the strong TI AgAsCa [4] in  $\mathcal{SG}$  **189** has SI  $(1, 1) \in \mathbb{Z}_3 \times \mathbb{Z}_3$ , and is listed under Table II for TCIs.

## II. TOWARDS IDEAL TOPOLOGICAL INSULATORS AND TOPOLOGICAL CRYSTALLINE INSULATORS

We list all the relatively good topological insulators found in our search by GGA calculations in the following table. The structure references are provided after the names of these materials. Through a further checking by the MBJ calculations, if the GGA calculations predicted band topology is maintained, we print the material name in blue. While in some cases, the MBJ calculations, however, predict a TCI phase, we print the name in red. For the materials whose names are in black, the MBJ calculations mostly predict a trivial insulator though they are predicted as TIs by GGA calculations. In very few cases, the MBJ calculations predict a (semi-)metal phase.

Part 1 of Table I:

TABLE I. The list of 241 TIs with relatively clean Fermi surfaces discovered by GGA calculations: when the MBJ calculation doesn't change the band topology predicted by GGA calculations, we print the material in blue, while the red color means that the MBJ calculation results in a topological crystalline phase. Note that the elements in a compound are arranged in the alphabetical order, e.g., CaAs<sub>3</sub> is listed as As<sub>3</sub>Ca.

| $SG$       | $X_{BS}$                                               | Topological insulators                                                                                                                                                                                                                                                                                                                                                                                                                                                                                                                                                                                                                                                                                                                                                                                                                                                                                                                                    |
|------------|--------------------------------------------------------|-----------------------------------------------------------------------------------------------------------------------------------------------------------------------------------------------------------------------------------------------------------------------------------------------------------------------------------------------------------------------------------------------------------------------------------------------------------------------------------------------------------------------------------------------------------------------------------------------------------------------------------------------------------------------------------------------------------------------------------------------------------------------------------------------------------------------------------------------------------------------------------------------------------------------------------------------------------|
| <b>2</b>   | $\mathbb{Z}_2^2 \times \mathbb{Z}_4$                   | <b>Ag<sub>2</sub>F<sub>5</sub></b> [5],As <sub>3</sub> Ca[6, 7],As <sub>3</sub> Sr[8, 9],AgO <sub>4</sub> S[10],Br <sub>5</sub> W[11],CaMo <sub>6</sub> S <sub>8</sub> [12],CaP <sub>3</sub> [9, 13]                                                                                                                                                                                                                                                                                                                                                                                                                                                                                                                                                                                                                                                                                                                                                      |
| <b>11</b>  | $\mathbb{Z}_2^2 \times \mathbb{Z}_4$                   | <b>BBeLi</b> [14], <b>CaSb<sub>2</sub></b> [15], <b>GeHfPd</b> [16], <b>HfS<sub>3</sub></b> [17], <b>Mo<sub>2</sub>S<sub>3</sub></b> [18], <b>Nb<sub>2</sub>Se<sub>3</sub></b> [19], <b>Se<sub>3</sub>Ta<sub>2</sub></b> [19, 20]                                                                                                                                                                                                                                                                                                                                                                                                                                                                                                                                                                                                                                                                                                                         |
| <b>12</b>  | $\mathbb{Z}_2^2 \times \mathbb{Z}_4$                   | Ag <sub>4</sub> K <sub>2</sub> Se <sub>3</sub> [21],Al <sub>2</sub> Ge <sub>4</sub> Sr <sub>3</sub> [22],Al <sub>8</sub> Mo <sub>3</sub> [23],As <sub>3</sub> Ba[9, 24], <b>As<sub>3</sub>Sr</b> [9, 25],Au <sub>2</sub> P <sub>3</sub> [26],BaSb <sub>3</sub> [27]<br>Ba <sub>2</sub> Cd <sub>2</sub> Sb <sub>3</sub> [28], <b>Ba<sub>2</sub>Hg<sub>3</sub>O<sub>14</sub>Pd<sub>7</sub></b> [29], <b>Ba<sub>3</sub>Li<sub>4</sub>Sn<sub>8</sub></b> [30], <b>BaTi<sub>4</sub></b> [31], <b>Ba<sub>11</sub>Bi<sub>14</sub>Cd<sub>8</sub></b> [32],Bi <sub>2</sub> Pb <sub>3</sub> S <sub>6</sub> [33]<br>Bi <sub>4</sub> Pb <sub>7</sub> Se <sub>13</sub> [34],Br <sub>4</sub> Cs <sub>2</sub> I <sub>2</sub> Pd[35], <b>Nb<sub>2</sub>PdS<sub>5</sub></b> [36],Nb <sub>2</sub> PdS <sub>6</sub> [37], <b>Nb<sub>2</sub>PdSe<sub>6</sub></b> [37],P <sub>3</sub> Sr[38]<br>,PdSe <sub>6</sub> Ta <sub>2</sub> [37],PtSe <sub>7</sub> Ta <sub>2</sub> [39] |
| <b>14</b>  | $\mathbb{Z}_2 \times \mathbb{Z}_4$                     | <b>Ag<sub>2</sub>Te</b> [40, 41], <b>Au<sub>4</sub>Li</b> [42], <b>B<sub>2</sub>S<sub>3</sub></b> [43],BaNb <sub>2</sub> O <sub>6</sub> [44]                                                                                                                                                                                                                                                                                                                                                                                                                                                                                                                                                                                                                                                                                                                                                                                                              |
| <b>15</b>  | $\mathbb{Z}_2 \times \mathbb{Z}_4$                     | MoP <sub>4</sub> [45],O <sub>5</sub> Ti <sub>3</sub> [46]                                                                                                                                                                                                                                                                                                                                                                                                                                                                                                                                                                                                                                                                                                                                                                                                                                                                                                 |
| <b>51</b>  | $\mathbb{Z}_2^2 \times \mathbb{Z}_4$                   | <b>AlPt<sub>2</sub></b> [47], <b>AuTe<sub>2</sub></b> [48], <b>Au<sub>3</sub>Rb<sub>2</sub>Tl</b> [49]                                                                                                                                                                                                                                                                                                                                                                                                                                                                                                                                                                                                                                                                                                                                                                                                                                                    |
| <b>55</b>  | $\mathbb{Z}_2 \times \mathbb{Z}_4$                     | <b>Bi<sub>6</sub>In<sub>2</sub>Sr<sub>5</sub></b> [50]                                                                                                                                                                                                                                                                                                                                                                                                                                                                                                                                                                                                                                                                                                                                                                                                                                                                                                    |
| <b>58</b>  | $\mathbb{Z}_4$                                         | <b>Bi<sub>2</sub>Hf</b> [51], <b>S<sub>2</sub>Ti</b> [52]                                                                                                                                                                                                                                                                                                                                                                                                                                                                                                                                                                                                                                                                                                                                                                                                                                                                                                 |
| <b>59</b>  | $\mathbb{Z}_2 \times \mathbb{Z}_4$                     | <b>Ag<sub>3</sub>Sb</b> [53], AuCs <sub>3</sub> Pb <sub>4</sub> [54], <b>AuPb<sub>4</sub>Rb<sub>3</sub></b> [54], AuRb <sub>3</sub> Sn <sub>4</sub> [54]                                                                                                                                                                                                                                                                                                                                                                                                                                                                                                                                                                                                                                                                                                                                                                                                  |
| <b>60</b>  | $\mathbb{Z}_4$                                         | <b>Au<sub>2</sub>Pb</b> [55], O <sub>2</sub> Pb[56]                                                                                                                                                                                                                                                                                                                                                                                                                                                                                                                                                                                                                                                                                                                                                                                                                                                                                                       |
| <b>62</b>  | $\mathbb{Z}_4$                                         | AsCdNa[57], <b>As<sub>2</sub>Hf</b> [58], <b>As<sub>2</sub>Zr</b> [59, 60],Ba <sub>2</sub> Pb[61],Ba <sub>2</sub> Si[62, 63],Ca <sub>3</sub> GeO[64],CdGeSr[65],CdNaSb[66, 67],FSeY[68]<br>GeHfPt[69, 70],GeMoZr[71],GePdZr[72, 73],GePtZr[73, 74],GeZr[75],Ge <sub>2</sub> InLiSr <sub>2</sub> [76], <b>Ge<sub>2</sub>Mo</b> [77]<br>Ge <sub>2</sub> W[78], HfNbP[79],HfP <sub>2</sub> [80],HfSi[81],NNa <sub>3</sub> [82],N <sub>5</sub> Ta <sub>3</sub> [83],PPtSc[73, 84]<br>P <sub>2</sub> Zr[85],P <sub>2</sub> Ti[86],PbSr <sub>2</sub> [87, 88],PdSiTi[73, 89],PdSiZr[75],PtSiTi[73, 74],PtSiZr[73, 90],Sb <sub>2</sub> SrZn[91, 92],SiSr[93],SiTi[94],SiZr[94]<br>AlLaPt[95],AuLa[95],GaLaPd[96],GaLaPt[96],GaLuPd[96],LaPPt[97]                                                                                                                                                                                                                 |
| <b>63</b>  | $\mathbb{Z}_2 \times \mathbb{Z}_4$                     | AgS <sub>3</sub> Ta[98],AlBMo[99],AlBW[99], Al <sub>2</sub> BaSi <sub>2</sub> [100], AuClTe <sub>2</sub> [101], B <sub>7</sub> WY <sub>3</sub> [102],CaSi [103]<br>Ga[104],GeNa <sub>2</sub> Zn[105], HfPd[106],HfTe <sub>5</sub> [107, 108],Te <sub>5</sub> Zr[107, 108]<br>AlLa[109],GaLa[110],GaLu[111],LiLuSn <sub>2</sub> [112]                                                                                                                                                                                                                                                                                                                                                                                                                                                                                                                                                                                                                      |
| <b>64</b>  | $\mathbb{Z}_2 \times \mathbb{Z}_4$                     | <b>As</b> [113], C <sub>2</sub> B <sub>2</sub> Mg[114]                                                                                                                                                                                                                                                                                                                                                                                                                                                                                                                                                                                                                                                                                                                                                                                                                                                                                                    |
| <b>65</b>  | $\mathbb{Z}_2^2 \times \mathbb{Z}_4$                   | <b>Ag<sub>3</sub>Te<sub>2</sub>Tl</b> [115],Ba <sub>3</sub> Ge <sub>4</sub> [116],AlB <sub>4</sub> Lu[117],LaSn <sub>2</sub> [118]                                                                                                                                                                                                                                                                                                                                                                                                                                                                                                                                                                                                                                                                                                                                                                                                                        |
| <b>69</b>  | $\mathbb{Z}_2^2 \times \mathbb{Z}_4$                   | <b>Be<sub>2</sub>Zn</b> [119]                                                                                                                                                                                                                                                                                                                                                                                                                                                                                                                                                                                                                                                                                                                                                                                                                                                                                                                             |
| <b>71</b>  | $\mathbb{Z}_2 \times \mathbb{Z}_4$                     | <b>AsTeTi</b> [120],Br <sub>2</sub> Ca <sub>3</sub> Si[121]                                                                                                                                                                                                                                                                                                                                                                                                                                                                                                                                                                                                                                                                                                                                                                                                                                                                                               |
| <b>72</b>  | $\mathbb{Z}_2 \times \mathbb{Z}_4$                     | Br <sub>2</sub> Hg <sub>5</sub> O <sub>4</sub> [122]                                                                                                                                                                                                                                                                                                                                                                                                                                                                                                                                                                                                                                                                                                                                                                                                                                                                                                      |
| <b>87</b>  | $\mathbb{Z}_2 \times \mathbb{Z}_8$                     | <b>Hf<sub>5</sub>Te<sub>4</sub></b> [123], <b>Se<sub>4</sub>Ti<sub>5</sub></b> [124], <b>Te<sub>4</sub>Zr<sub>5</sub></b> [125]                                                                                                                                                                                                                                                                                                                                                                                                                                                                                                                                                                                                                                                                                                                                                                                                                           |
| <b>121</b> | $\mathbb{Z}_2$                                         | Ag <sub>2</sub> S <sub>4</sub> SnZn[126]                                                                                                                                                                                                                                                                                                                                                                                                                                                                                                                                                                                                                                                                                                                                                                                                                                                                                                                  |
| <b>122</b> | $\mathbb{Z}_2$                                         | As <sub>2</sub> CdGe[127],As <sub>2</sub> CdSn[128],As <sub>2</sub> SnZn[129],CdSb <sub>2</sub> Sn[130]                                                                                                                                                                                                                                                                                                                                                                                                                                                                                                                                                                                                                                                                                                                                                                                                                                                   |
| <b>123</b> | $\mathbb{Z}_2 \times \mathbb{Z}_4 \times \mathbb{Z}_8$ | BaGe <sub>3</sub> Mg <sub>4</sub> [131],ClNa <sub>2</sub> [132],ClNa <sub>3</sub> [132]                                                                                                                                                                                                                                                                                                                                                                                                                                                                                                                                                                                                                                                                                                                                                                                                                                                                   |
| <b>127</b> | $\mathbb{Z}_4 \times \mathbb{Z}_8$                     | <b>B<sub>4</sub>Y</b> [133],CsI <sub>3</sub> Sn[134, 135], <b>Pt<sub>3</sub>Si</b> [136], <b>B<sub>4</sub>La</b> [137], <b>B<sub>4</sub>Lu</b> [138]                                                                                                                                                                                                                                                                                                                                                                                                                                                                                                                                                                                                                                                                                                                                                                                                      |
| <b>129</b> | $\mathbb{Z}_2 \times \mathbb{Z}_4$                     | <b>HfSb<sub>2</sub></b> [139]                                                                                                                                                                                                                                                                                                                                                                                                                                                                                                                                                                                                                                                                                                                                                                                                                                                                                                                             |
| <b>136</b> | $\mathbb{Z}_4$                                         | Ag <sub>5</sub> CsSe <sub>3</sub> [140],Ag <sub>5</sub> CsTe <sub>3</sub> [141]                                                                                                                                                                                                                                                                                                                                                                                                                                                                                                                                                                                                                                                                                                                                                                                                                                                                           |
| <b>139</b> | $\mathbb{Z}_2 \times \mathbb{Z}_8$                     | <b>Ag<sub>2</sub>Zr</b> [142], <b>BaCd<sub>2</sub>Ge<sub>2</sub></b> [143], <b>BaGe<sub>2</sub>Mg<sub>2</sub></b> [144]<br><b>CaGe<sub>2</sub>Zn<sub>2</sub></b> [144], <b>Cd<sub>2</sub>Ge<sub>2</sub>Sr</b> [145], <b>Ge<sub>2</sub>SrZn<sub>2</sub></b> [146], <b>InPd<sub>3</sub></b> [147], <b>Pd<sub>2</sub>Ti</b> [148]                                                                                                                                                                                                                                                                                                                                                                                                                                                                                                                                                                                                                            |

Part 2 of Table I:

|     |                                       |                                                                                                                                                                                                                                                                                                                                                                                                                                                                                                                                                                                                                                                                                                                                                                                                                                                                                                                                                                                                                                                  |
|-----|---------------------------------------|--------------------------------------------------------------------------------------------------------------------------------------------------------------------------------------------------------------------------------------------------------------------------------------------------------------------------------------------------------------------------------------------------------------------------------------------------------------------------------------------------------------------------------------------------------------------------------------------------------------------------------------------------------------------------------------------------------------------------------------------------------------------------------------------------------------------------------------------------------------------------------------------------------------------------------------------------------------------------------------------------------------------------------------------------|
| 140 | $\mathbb{Z}_2 \times \mathbb{Z}_8$    | Hf <sub>2</sub> Si[149],SiZr <sub>2</sub> [150],Sb <sub>2</sub> Ti[151],Si <sub>3</sub> Sr <sub>5</sub> [152],Sn <sub>3</sub> Sr <sub>5</sub> [153]                                                                                                                                                                                                                                                                                                                                                                                                                                                                                                                                                                                                                                                                                                                                                                                                                                                                                              |
| 164 | $\mathbb{Z}_2 \times \mathbb{Z}_4$    | Ag <sub>2</sub> O[154],As <sub>2</sub> Ge <sub>5</sub> Te <sub>8</sub> [155],As <sub>4</sub> GeTe <sub>7</sub> [156],BaSn <sub>2</sub> [157, 158],Be[159],Bi <sub>2</sub> Li <sub>3</sub> Y[160],Bi <sub>2</sub> Mg <sub>3</sub> [161, 162]<br>Bi <sub>2</sub> Pb <sub>2</sub> Se <sub>5</sub> [163, 164],Bi <sub>4</sub> SnTe <sub>7</sub> [165],CNb <sub>2</sub> [166],CTa <sub>2</sub> [167],C <sub>6</sub> K <sub>2</sub> N <sub>6</sub> PtS <sub>6</sub> [168],C <sub>6</sub> N <sub>6</sub> PtRb <sub>2</sub> S <sub>6</sub> [168]<br>CaGe <sub>2</sub> [169, 170],CaSi <sub>2</sub> [170, 171],GeSb <sub>4</sub> Te <sub>7</sub> [172],Ge <sub>2</sub> Sr[170, 173],PdTe <sub>2</sub> [174, 175],PtTe <sub>2</sub> [176, 177],Sb <sub>2</sub> Te <sub>2</sub> [178],SiTe <sub>2</sub> [179]                                                                                                                                                                                                                                               |
| 166 | $\mathbb{Z}_2 \times \mathbb{Z}_4$    | Cl <sub>8</sub> Na <sub>2</sub> Ti <sub>3</sub> [180],Al <sub>10</sub> Ba <sub>7</sub> [181],As[182],As <sub>2</sub> CaGa <sub>2</sub> [183]<br>As <sub>2</sub> Ge <sub>4</sub> Te <sub>7</sub> [184],As <sub>2</sub> Sn <sub>2</sub> Sr[185, 186],Bi <sub>2</sub> GeTe <sub>4</sub> [187, 188], Bi <sub>2</sub> PbTe <sub>4</sub> [189],Bi <sub>2</sub> SeTe <sub>2</sub> [190, 191],Bi <sub>2</sub> Se <sub>3</sub> [192, 193],Bi <sub>2</sub> Te <sub>3</sub> [193, 194]<br>Bi <sub>6</sub> PbTe <sub>10</sub> [194],CS <sub>2</sub> Ta <sub>2</sub> [195],CY <sub>2</sub> [196],C <sub>5</sub> Ti <sub>8</sub> [197]<br>CaGe <sub>2</sub> [198],CaSi <sub>2</sub> [199, 200],GaGeTe[201]<br>GaP[202],In <sub>2</sub> Te <sub>3</sub> [203]<br>N <sub>2</sub> W[204],Sb[205],SbTe <sub>2</sub> Tl[206, 207],Sb <sub>2</sub> SeTe <sub>2</sub> [208, 209]<br>Sb <sub>2</sub> SnTe <sub>4</sub> [210, 211],Sb <sub>2</sub> Te <sub>3</sub> [193, 212],Sb <sub>8</sub> Te <sub>3</sub> [213],Sb <sub>48</sub> Te <sub>9</sub> [213]<br>ClLa[214] |
| 191 | $\mathbb{Z}_6 \times \mathbb{Z}_{12}$ | B <sub>2</sub> Sr[215],BaSi <sub>2</sub> [216],CaSi <sub>2</sub> [217],Ti[218]                                                                                                                                                                                                                                                                                                                                                                                                                                                                                                                                                                                                                                                                                                                                                                                                                                                                                                                                                                   |
| 193 | $\mathbb{Z}_{12}$                     | Pb <sub>3</sub> TeZr <sub>5</sub> [219]                                                                                                                                                                                                                                                                                                                                                                                                                                                                                                                                                                                                                                                                                                                                                                                                                                                                                                                                                                                                          |
| 194 | $\mathbb{Z}_{12}$                     | AlN <sub>3</sub> Ti <sub>4</sub> [220],Al <sub>2</sub> Hf[221],C <sub>2</sub> AlTa <sub>3</sub> [222],Ca <sub>2</sub> IN[223]<br>MgPo[224],SiSr <sub>2</sub> [225]                                                                                                                                                                                                                                                                                                                                                                                                                                                                                                                                                                                                                                                                                                                                                                                                                                                                               |
| 216 | $\mathbb{Z}_2$                        | AgKO[226],AgNaO[226],AgORb[226],HgS[227],InN[228],NTI [229]                                                                                                                                                                                                                                                                                                                                                                                                                                                                                                                                                                                                                                                                                                                                                                                                                                                                                                                                                                                      |
| 221 | $\mathbb{Z}_4 \times \mathbb{Z}_8$    | AlSc[230],AlY[231],B <sub>6</sub> Ca[232],B <sub>6</sub> Sr[232],BeTi[233]<br>Br <sub>3</sub> CsGe[234],Br <sub>3</sub> CsPb[235],CsI <sub>3</sub> Sn[236]<br>PbSe[237]                                                                                                                                                                                                                                                                                                                                                                                                                                                                                                                                                                                                                                                                                                                                                                                                                                                                          |
| 223 | $\mathbb{Z}_4$                        | BiNb <sub>3</sub> [238],Nb <sub>3</sub> Sb[239],SbTa <sub>3</sub> [240, 241]                                                                                                                                                                                                                                                                                                                                                                                                                                                                                                                                                                                                                                                                                                                                                                                                                                                                                                                                                                     |
| 225 | $\mathbb{Z}_8$                        | BiY[242],CZr[243],Li <sub>2</sub> MgSi[244],N <sub>2</sub> Pd[245],AsLa[246, 247],BiLa[246, 247],BiLu[248]<br>LaP[247, 249],LaSb[247, 250]                                                                                                                                                                                                                                                                                                                                                                                                                                                                                                                                                                                                                                                                                                                                                                                                                                                                                                       |
| 227 | $\mathbb{Z}_4$                        | CTi <sub>2</sub> [251],Se[252]                                                                                                                                                                                                                                                                                                                                                                                                                                                                                                                                                                                                                                                                                                                                                                                                                                                                                                                                                                                                                   |

We list all the relatively good topological crystalline insulators found in our database topological materials searches by GGA calculations in the following table. We give all the structure references behind the names of these materials. Through a further checking by the MBJ calculations, if the GGA calculations predicted band topology is maintained, we print the material name in blue. While in some cases, the MBJ calculations, however, predict a TI phase, we print the name in red. For the materials whose names are in black, the MBJ calculations mostly predict a trivial insulator though they are predicted as TCIs by GGA calculations. In very few cases, the MBJ calculations predict a (semi-)metal phase.

| $SG$       | $X_{BS}$                                               | Topological crystalline insulators                                                                                                                                                                                                                                                                                                                                                                                                                                                                                                                                                                                                                                                                                           |
|------------|--------------------------------------------------------|------------------------------------------------------------------------------------------------------------------------------------------------------------------------------------------------------------------------------------------------------------------------------------------------------------------------------------------------------------------------------------------------------------------------------------------------------------------------------------------------------------------------------------------------------------------------------------------------------------------------------------------------------------------------------------------------------------------------------|
| <b>2</b>   | $\mathbb{Z}_2^3 \times \mathbb{Z}_4$                   | CsHg[253]                                                                                                                                                                                                                                                                                                                                                                                                                                                                                                                                                                                                                                                                                                                    |
| <b>11</b>  | $\mathbb{Z}_2^2 \times \mathbb{Z}_4$                   | BaSb <sub>2</sub> [254],MoTe <sub>2</sub> [255],Sb <sub>2</sub> Sr[256],Se <sub>3</sub> Ta[257, 258]                                                                                                                                                                                                                                                                                                                                                                                                                                                                                                                                                                                                                         |
| <b>12</b>  | $\mathbb{Z}_2^2 \times \mathbb{Z}_4$                   | Al <sub>4</sub> Cl <sub>5</sub> Zr <sub>12</sub> [259],Al <sub>4</sub> Na <sub>4</sub> P <sub>12</sub> Sr <sub>8</sub> [260],As <sub>2</sub> Nb[261, 262],As <sub>2</sub> Ta[262, 263],As <sub>3</sub> Mo <sub>2</sub> [264],As <sub>3</sub> W <sub>2</sub> [265]<br>As <sub>4</sub> Ba <sub>3</sub> Zn <sub>2</sub> [266],Ba <sub>3</sub> Cd <sub>2</sub> Sb <sub>4</sub> [267],BiBr[268],BiHf <sub>2</sub> [269],Bi <sub>2</sub> ITe[270, 271],CdK <sub>6</sub> Pb <sub>8</sub> [272],ClZr [273]<br>Cl <sub>8</sub> NSc <sub>5</sub> [274],NbP <sub>2</sub> [275],NbSb <sub>2</sub> [276],Sb <sub>2</sub> Ta[277, 278],Se <sub>4</sub> Ti <sub>3</sub> [279],Ta <sub>2</sub> Te <sub>3</sub> [280],Ge <sub>2</sub> Re[281] |
| <b>14</b>  | $\mathbb{Z}_2 \times \mathbb{Z}_4$                     | LaSbSe[282],AsSY[283],LaSbSe[282]                                                                                                                                                                                                                                                                                                                                                                                                                                                                                                                                                                                                                                                                                            |
| <b>51</b>  | $\mathbb{Z}_2^2 \times \mathbb{Z}_4$                   | GaPt <sub>2</sub> [284]                                                                                                                                                                                                                                                                                                                                                                                                                                                                                                                                                                                                                                                                                                      |
| <b>55</b>  | $\mathbb{Z}_2 \times \mathbb{Z}_4$                     | Ca <sub>5</sub> Ga <sub>2</sub> Sb <sub>6</sub> [285]                                                                                                                                                                                                                                                                                                                                                                                                                                                                                                                                                                                                                                                                        |
| <b>58</b>  | $\mathbb{Z}_4$                                         | Bi <sub>3</sub> RbS <sub>5</sub> [286]                                                                                                                                                                                                                                                                                                                                                                                                                                                                                                                                                                                                                                                                                       |
| <b>59</b>  | $\mathbb{Z}_2 \times \mathbb{Z}_4$                     | BrNTi[287]                                                                                                                                                                                                                                                                                                                                                                                                                                                                                                                                                                                                                                                                                                                   |
| <b>62</b>  | $\mathbb{Z}_4$                                         | HgSr <sub>3</sub> [288],LaSbTe[289]                                                                                                                                                                                                                                                                                                                                                                                                                                                                                                                                                                                                                                                                                          |
| <b>63</b>  | $\mathbb{Z}_2 \times \mathbb{Z}_4$                     | BaGe[290],BaSi[291], BaSn[292],BaPb[293],Ba <sub>3</sub> Pb <sub>5</sub> [294],Ca <sub>2</sub> InN[295],Ba <sub>5</sub> Cd <sub>2</sub> FSb <sub>5</sub> [296], CaGe[297],CaSn<br>[298]<br>Cd <sub>2</sub> FSb <sub>5</sub> Sr <sub>5</sub> [299],PbSr[300],SnSr[301],AlGeLu[302],La <sub>2</sub> Li <sub>2</sub> Si <sub>3</sub> [303],Ge <sub>3</sub> La <sub>2</sub> Li <sub>2</sub> [304]                                                                                                                                                                                                                                                                                                                                |
| <b>64</b>  | $\mathbb{Z}_2 \times \mathbb{Z}_4$                     | Ca <sub>5</sub> Ga <sub>2</sub> N <sub>4</sub> [305],Li[306]                                                                                                                                                                                                                                                                                                                                                                                                                                                                                                                                                                                                                                                                 |
| <b>69</b>  | $\mathbb{Z}_2^2 \times \mathbb{Z}_4$                   | Ge <sub>6</sub> Li <sub>2</sub> Sr <sub>4</sub> [307]                                                                                                                                                                                                                                                                                                                                                                                                                                                                                                                                                                                                                                                                        |
| <b>71</b>  | $\mathbb{Z}_2 \times \mathbb{Z}_4$                     | Ba <sub>3</sub> Bi <sub>4</sub> Li <sub>4</sub> [308],Ba <sub>3</sub> Li <sub>4</sub> Sb <sub>4</sub> [308]                                                                                                                                                                                                                                                                                                                                                                                                                                                                                                                                                                                                                  |
| <b>87</b>  | $\mathbb{Z}_2 \times \mathbb{Z}_8$                     | Au <sub>4</sub> Ti[309]                                                                                                                                                                                                                                                                                                                                                                                                                                                                                                                                                                                                                                                                                                      |
| <b>88</b>  | $\mathbb{Z}_4$                                         | O <sub>4</sub> PbPd <sub>2</sub> [310]                                                                                                                                                                                                                                                                                                                                                                                                                                                                                                                                                                                                                                                                                       |
| <b>123</b> | $\mathbb{Z}_2 \times \mathbb{Z}_4 \times \mathbb{Z}_8$ | As <sub>3</sub> CsZn <sub>4</sub> [311],As <sub>3</sub> RbZn <sub>4</sub> [311],Pd <sub>3</sub> Sn[312]                                                                                                                                                                                                                                                                                                                                                                                                                                                                                                                                                                                                                      |
| <b>129</b> | $\mathbb{Z}_2 \times \mathbb{Z}_4$                     | AsGeNb[313],GeHfS[314, 315],GeHfSe[314, 315],GeHfTe[314, 315],GeNbSb[316],GeSZr [317]<br>GeSeZr[314],HfSSi[314, 315],HfSeSi[314, 315],OSiZr[314],SSiZr[318],SeSiZr[318],SiTeZr[318],SnTeZr[318]                                                                                                                                                                                                                                                                                                                                                                                                                                                                                                                              |
| <b>137</b> | $\mathbb{Z}_4$                                         | Ba <sub>2</sub> LiN[319]                                                                                                                                                                                                                                                                                                                                                                                                                                                                                                                                                                                                                                                                                                     |
| <b>139</b> | $\mathbb{Z}_2 \times \mathbb{Z}_8$                     | AsBa <sub>2</sub> [320],AsCa <sub>2</sub> [321]<br>Ba <sub>2</sub> Bi[322],Ba <sub>2</sub> Sb[323],BiSr <sub>2</sub> [323],Bi <sub>2</sub> F <sub>2</sub> OSr <sub>2</sub> Ti <sub>2</sub> [324],Br <sub>2</sub> Ca <sub>3</sub> Si [325],SbSr <sub>2</sub> [326]                                                                                                                                                                                                                                                                                                                                                                                                                                                            |
| <b>140</b> | $\mathbb{Z}_2 \times \mathbb{Z}_8$                     | Bi[327],GePt <sub>3</sub> [328]                                                                                                                                                                                                                                                                                                                                                                                                                                                                                                                                                                                                                                                                                              |
| <b>148</b> | $\mathbb{Z}_2 \times \mathbb{Z}_4$                     | Mo <sub>3</sub> S <sub>4</sub> [329]                                                                                                                                                                                                                                                                                                                                                                                                                                                                                                                                                                                                                                                                                         |
| <b>164</b> | $\mathbb{Z}_2 \times \mathbb{Z}_4$                     | BaSi <sub>2</sub> [330],BiTe[331],Bi <sub>2</sub> Pb <sub>2</sub> Te <sub>5</sub> [332, 333], Bi <sub>2</sub> Se <sub>2</sub> [334],Bi <sub>3</sub> STe <sub>2</sub> [335],Te <sub>2</sub> Zr[336]                                                                                                                                                                                                                                                                                                                                                                                                                                                                                                                           |
| <b>166</b> | $\mathbb{Z}_2 \times \mathbb{Z}_4$                     | AsNaTe <sub>2</sub> Zr <sub>2</sub> [337],As <sub>3</sub> Cd <sub>4</sub> K[338]<br>As <sub>3</sub> Cd <sub>4</sub> Na[338],As <sub>3</sub> Cd <sub>4</sub> Rb[338],Bi[339],Bi <sub>4</sub> Se <sub>3</sub> [340, 341],Bi <sub>8</sub> Se <sub>9</sub> [342],BrZr[343],CNb <sub>2</sub> S <sub>2</sub> [344]<br>ClZr[273],Hg[345],P[346]<br>BrLa[347]                                                                                                                                                                                                                                                                                                                                                                        |
| <b>187</b> | $\mathbb{Z}_3 \times \mathbb{Z}_3$                     | CHf[348],InNbSe <sub>2</sub> [349, 350],NY[351]                                                                                                                                                                                                                                                                                                                                                                                                                                                                                                                                                                                                                                                                              |
| <b>189</b> | $\mathbb{Z}_3 \times \mathbb{Z}_3$                     | AgAsCa[4, 352],AgCaP[4, 353]<br>GeLiY[354],AsLuPd[355]                                                                                                                                                                                                                                                                                                                                                                                                                                                                                                                                                                                                                                                                       |
| <b>191</b> | $\mathbb{Z}_6 \times \mathbb{Z}_{12}$                  | B <sub>2</sub> Zr[356]                                                                                                                                                                                                                                                                                                                                                                                                                                                                                                                                                                                                                                                                                                       |
| <b>193</b> | $\mathbb{Z}_{12}$                                      | Pb <sub>3</sub> SZr <sub>5</sub> [357]                                                                                                                                                                                                                                                                                                                                                                                                                                                                                                                                                                                                                                                                                       |
| <b>194</b> | $\mathbb{Z}_{12}$                                      | AsHgK[358, 359],C[360],CdNa <sub>2</sub> Sn[361], HgKSb[359, 362],SnTi <sub>2</sub> [363]                                                                                                                                                                                                                                                                                                                                                                                                                                                                                                                                                                                                                                    |
| <b>221</b> | $\mathbb{Z}_4 \times \mathbb{Z}_8$                     | Ba <sub>3</sub> OPb[364, 365],CaPd[366],Ca <sub>3</sub> GeO[364, 365],Ca <sub>3</sub> OPb[365, 367],Ca <sub>3</sub> OSn[364],NTi <sub>3</sub> Tl[368]<br>NY[369],OPbSr <sub>3</sub> [364, 365],PbPt <sub>3</sub> [370],Pt <sub>3</sub> Sn[371]                                                                                                                                                                                                                                                                                                                                                                                                                                                                               |
| <b>225</b> | $\mathbb{Z}_8$                                         | AsSc[372],Au <sub>2</sub> InSc[373],Au <sub>2</sub> InY[374],Ba[375],BiI <sub>3</sub> [376],BiSc[377]<br>CPt[378],Ca[205],SSn[379],SbSc[380],SeSn[381], SnTe[382, 383],LuSb[384]                                                                                                                                                                                                                                                                                                                                                                                                                                                                                                                                             |
| <b>227</b> | $\mathbb{Z}_4$                                         | S <sub>2</sub> Ti[385]                                                                                                                                                                                                                                                                                                                                                                                                                                                                                                                                                                                                                                                                                                       |

TABLE II. The list of 142 TCIs with clean Fermi surfaces discovered by GGA calculations where the color blue denotes that the MBJ calculation doesn't change the band topology while the red color means that the MBJ calculation results in a strong insulator. Note that the elements in a compound are arranged in the alphabetical order, e.g., TiS<sub>2</sub> is listed as S<sub>2</sub>Ti.

We further highlight a few exceptionally promising candidates which have a full band gap larger than or equal to room temperature, i.e.,  $\geq 25$  meV. They are listed in Table III. Importantly, this list of materials demonstrates a large chemical and structural diversity, which will hopefully provide new topological materials classes that do not suffer from the practical limitations of growing high-quality, insulating samples of the famous  $\text{Bi}_2\text{Se}_3$  family for strong TI materials [386–388] and the SnTe family for TCIs [389, 390].

In addition to the TIs and TCIs highlighted in Table III, there are also many TIs/TCIs with sizable direct band gap and small Fermi pockets in Tables I and II. Despite lacking full band gaps, they nonetheless have relatively large direct continuous gaps throughout the Brillouin zone (BZ). Therefore, these TIs/TCIs might also display robust topological features, and depending on the elements involved they could be favorable for certain specific applications. We believe these compounds also deserve future research attention.

| Material name (space group)                                         | Prediction (Method) | Full band gap |
|---------------------------------------------------------------------|---------------------|---------------|
| $\text{Sb}_2\text{Sr}$ ( $\mathcal{SG}11$ )                         | TI (MBJ)            | 120 meV       |
| $\text{Al}_2\text{Ge}_4\text{Sr}_3$ ( $\mathcal{SG}12$ )            | TI (MBJ)            | 26 meV        |
| $\text{Ba}_{11}\text{Bi}_{14}\text{Cd}_8$ ( $\mathcal{SG}12$ )      | TI (MBJ)            | 34 meV        |
| $\text{O}_2\text{Pb}$ ( $\mathcal{SG}60$ )                          | TI (GGA)            | 40 meV        |
| $\text{AsCdNa}$ ( $\mathcal{SG}62$ )                                | TI (GGA)            | 87 meV        |
| $\text{Br}_2\text{Ca}_3\text{Si}$ ( $\mathcal{SG}71$ )              | TI (GGA)            | 50 meV        |
| $\text{Ag}_5\text{CsSe}_3$ ( $\mathcal{SG}136$ )                    | TI (GGA)            | 40 meV        |
| $\text{Ag}_5\text{CsTe}_3$ ( $\mathcal{SG}136$ )                    | TI (GGA)            | 46 meV        |
| $\text{C}_6\text{K}_2\text{N}_6\text{PtS}_6$ ( $\mathcal{SG}164$ )  | TI (GGA)            | 50 meV        |
| $\text{C}_6\text{N}_6\text{Rb}_2\text{PtS}_6$ ( $\mathcal{SG}164$ ) | TI (GGA)            | 55 meV        |
| $\text{As}_2\text{Sn}_2\text{Sr}$ ( $\mathcal{SG}166$ )             | TI (GGA)            | 30 meV        |
| $\text{GaGeTe}$ ( $\mathcal{SG}166$ )                               | TI (GGA)            | 25 meV        |
| $\text{HgS}$ ( $\mathcal{SG}216$ )                                  | TI (GGA)            | 150 meV       |
| $\text{Bi}_2\text{Pb}_2\text{Te}_5$ ( $\mathcal{SG}164$ )           | TCI (MBJ)           | 40 meV        |
| $\text{Bi}_2\text{Se}_2$ ( $\mathcal{SG}164$ )                      | TCI (MBJ)           | 25 meV        |

TABLE III. Good TI or TCI candidates with band gap larger than or equal to 25 meV. We give both the topological predictions together with the method used (GGA or MBJ) and the corresponding full band gaps. For comparison, the band gap for the strong TI  $\text{Bi}_2\text{Se}_3$  is 258 meV (GGA) and that for the TCI SnTe is 234 meV (GGA). Note that the elements in a compound are arranged in the alphabetical order, e.g.,  $\text{Sr}_3(\text{AlGe}_2)_2$  is listed as  $\text{Al}_2\text{Ge}_4\text{Sr}_3$ .

### III. TOPOLOGICAL (SEMI-)METALS

We list all the relatively good topological (semi-)metals found in our database topological materials search by GGA calculations in the following table. Each material belongs to a specialized  $\mathcal{SG}$ , and we give all the structure references behind each the name.

Part 1 of Table IV:

TABLE IV. The list of 692 topological (semi-)metals with relatively clean Fermi surfaces discovered based on the GGA calculations: Note that the elements in a compound are arranged in the alphabetical order, e.g., Cd<sub>3</sub>As<sub>2</sub> is listed as As<sub>2</sub>Cd<sub>3</sub>.

| $SG$ | Topological (semi-)metals                                                                                                                                                                                                                                                                                                                                                                                                                                                                                                                                                                                                                                                                                                                                                                                                                                                                                                                                                                                                                                                                                                                                           |
|------|---------------------------------------------------------------------------------------------------------------------------------------------------------------------------------------------------------------------------------------------------------------------------------------------------------------------------------------------------------------------------------------------------------------------------------------------------------------------------------------------------------------------------------------------------------------------------------------------------------------------------------------------------------------------------------------------------------------------------------------------------------------------------------------------------------------------------------------------------------------------------------------------------------------------------------------------------------------------------------------------------------------------------------------------------------------------------------------------------------------------------------------------------------------------|
| 11   | Br <sub>9</sub> TeW[391], CBrHgNS[392], Li <sub>7</sub> Sn <sub>3</sub> [393], Mo <sub>2</sub> S <sub>2</sub> Sb[394]                                                                                                                                                                                                                                                                                                                                                                                                                                                                                                                                                                                                                                                                                                                                                                                                                                                                                                                                                                                                                                               |
| 15   | BaLa <sub>4</sub> [395]                                                                                                                                                                                                                                                                                                                                                                                                                                                                                                                                                                                                                                                                                                                                                                                                                                                                                                                                                                                                                                                                                                                                             |
| 51   | AuCd[396], AuTi[397]                                                                                                                                                                                                                                                                                                                                                                                                                                                                                                                                                                                                                                                                                                                                                                                                                                                                                                                                                                                                                                                                                                                                                |
| 52   | Ag <sub>2</sub> BiO <sub>3</sub> [398], Bi <sub>3</sub> Sr <sub>2</sub> [399]                                                                                                                                                                                                                                                                                                                                                                                                                                                                                                                                                                                                                                                                                                                                                                                                                                                                                                                                                                                                                                                                                       |
| 55   | Al <sub>3</sub> Pd <sub>5</sub> [400], Al <sub>3</sub> Pt <sub>5</sub> [401], BCl <sub>6</sub> Sc <sub>4</sub> [402], Bi <sub>9</sub> Ca <sub>9</sub> Cd <sub>4</sub> [403], Bi <sub>9</sub> Ca <sub>9</sub> Zn <sub>4</sub> [404], Bi <sub>9</sub> Cd <sub>4</sub> Sr <sub>9</sub> [403], In <sub>5</sub> S <sub>13</sub> Y <sub>4</sub> [405]                                                                                                                                                                                                                                                                                                                                                                                                                                                                                                                                                                                                                                                                                                                                                                                                                     |
| 57   | AlCaPd[406], BiK <sub>2</sub> Sn[407]                                                                                                                                                                                                                                                                                                                                                                                                                                                                                                                                                                                                                                                                                                                                                                                                                                                                                                                                                                                                                                                                                                                               |
| 58   | C <sub>60</sub> K[408]                                                                                                                                                                                                                                                                                                                                                                                                                                                                                                                                                                                                                                                                                                                                                                                                                                                                                                                                                                                                                                                                                                                                              |
| 59   | Ag <sub>3</sub> Sn[409]                                                                                                                                                                                                                                                                                                                                                                                                                                                                                                                                                                                                                                                                                                                                                                                                                                                                                                                                                                                                                                                                                                                                             |
| 60   | F <sub>4</sub> NaTi[410], O <sub>2</sub> Re[411]                                                                                                                                                                                                                                                                                                                                                                                                                                                                                                                                                                                                                                                                                                                                                                                                                                                                                                                                                                                                                                                                                                                    |
| 61   | AgF <sub>2</sub> [412]                                                                                                                                                                                                                                                                                                                                                                                                                                                                                                                                                                                                                                                                                                                                                                                                                                                                                                                                                                                                                                                                                                                                              |
| 62   | AgAuF <sub>7</sub> [413], AgF <sub>3</sub> K[414], AlPt <sub>2</sub> [415]<br>Bi <sub>3</sub> Ca <sub>5</sub> [416], Bi <sub>3</sub> Sr <sub>5</sub> [417], Ca <sub>5</sub> Sb <sub>3</sub> [418]<br>GeNb <sub>3</sub> Te <sub>6</sub> [419], GePd <sub>2</sub> Y[420], N <sub>3</sub> Nb <sub>2</sub> [421], Nb <sub>3</sub> Si[422]<br>PdSbZr[423], SiTa <sub>3</sub> Te <sub>6</sub> [423], AuLu <sub>2</sub> [424], GeLa[425], GeLaPd <sub>2</sub> [425], GeLuPd <sub>2</sub> [426], LuPd <sub>2</sub> Si[427], LuPt[428],<br>LuPt <sub>2</sub> Si[429]                                                                                                                                                                                                                                                                                                                                                                                                                                                                                                                                                                                                         |
| 63   | AgCa[430], AuCa[431], BiZr[432], Ga <sub>3</sub> PdSr[433], Ga <sub>5</sub> Zr <sub>3</sub> [434], GeSc[435], GeY[436],<br>HfSb[437], K <sub>3</sub> O <sub>4</sub> Pd <sub>2</sub> [438], K <sub>3</sub> O <sub>4</sub> Pt <sub>2</sub> [439], K <sub>4</sub> P <sub>3</sub> [440, 441], N <sub>5</sub> NaTa <sub>3</sub> [442], PdY[443], SiY[444],<br>Sr <sub>3</sub> Tl <sub>5</sub> [445], LuSi[446], Al <sub>6</sub> Re[447]                                                                                                                                                                                                                                                                                                                                                                                                                                                                                                                                                                                                                                                                                                                                  |
| 64   | AgCs <sub>2</sub> F <sub>4</sub> [448], Au <sub>10</sub> Ca <sub>4</sub> In <sub>3</sub> [449], Bi[450, 451], LaSb <sub>2</sub> [452]                                                                                                                                                                                                                                                                                                                                                                                                                                                                                                                                                                                                                                                                                                                                                                                                                                                                                                                                                                                                                               |
| 65   | C <sub>7</sub> Re <sub>2</sub> Sc <sub>5</sub> [453], Ge <sub>10</sub> La <sub>7</sub> Li <sub>8</sub> [454]                                                                                                                                                                                                                                                                                                                                                                                                                                                                                                                                                                                                                                                                                                                                                                                                                                                                                                                                                                                                                                                        |
| 71   | ReSi <sub>2</sub> [455]                                                                                                                                                                                                                                                                                                                                                                                                                                                                                                                                                                                                                                                                                                                                                                                                                                                                                                                                                                                                                                                                                                                                             |
| 74   | Ag <sub>2</sub> La[456], Au <sub>2</sub> La[456], In <sub>2</sub> La[457]                                                                                                                                                                                                                                                                                                                                                                                                                                                                                                                                                                                                                                                                                                                                                                                                                                                                                                                                                                                                                                                                                           |
| 87   | Ba <sub>9</sub> In <sub>4</sub> [458], In <sub>4</sub> Pd <sub>17</sub> Se <sub>4</sub> [459], Pt <sub>11</sub> Zr <sub>9</sub> [460], Pt <sub>12</sub> Si <sub>5</sub> [461]                                                                                                                                                                                                                                                                                                                                                                                                                                                                                                                                                                                                                                                                                                                                                                                                                                                                                                                                                                                       |
| 88   | Al <sub>21</sub> Pt <sub>8</sub> [462], CsFO <sub>3</sub> S[463], Ge <sub>8</sub> Pd <sub>21</sub> [464], LaO <sub>4</sub> Pd <sub>2</sub> [465]                                                                                                                                                                                                                                                                                                                                                                                                                                                                                                                                                                                                                                                                                                                                                                                                                                                                                                                                                                                                                    |
| 123  | AgPPt <sub>5</sub> [466], AlPPt <sub>5</sub> [466], AsInPd <sub>5</sub> [467], AsPd <sub>5</sub> Tl[468]<br>AsPt <sub>5</sub> Tl[468], As <sub>2</sub> BaPd <sub>2</sub> [469], BaP <sub>2</sub> Pd <sub>2</sub> [470], CaPb[471]<br>CdPd[472], CdPd <sub>5</sub> Se[473], CdPt[474], Cd <sub>3</sub> Zr[475]<br>FKNb <sub>4</sub> O <sub>5</sub> [476], HgPd[477], HgPd <sub>5</sub> Se[478], HgPt[479], Hg <sub>2</sub> Pt[479]<br>InPPd <sub>5</sub> [480], InPPt <sub>5</sub> [480], PPd <sub>5</sub> Tl[480], PPt <sub>5</sub> Tl[480]<br>PdTi[481], Pd <sub>5</sub> SeZn[482], SiSr[483], Sr[484], C <sub>2</sub> Re[485], AsLa[486], LaSb[487]                                                                                                                                                                                                                                                                                                                                                                                                                                                                                                               |
| 127  | AlSc <sub>2</sub> Si <sub>2</sub> [488], Au <sub>2</sub> Ca <sub>2</sub> Pb[489], Au <sub>2</sub> InY <sub>2</sub> [490], B <sub>2</sub> Ta <sub>3</sub> [491]<br>B <sub>4</sub> W[492], C <sub>2</sub> B <sub>2</sub> Y[493], Ga <sub>2</sub> MgSc <sub>2</sub> [494], Ca <sub>3</sub> Hg <sub>2</sub> [495]<br>Ga <sub>2</sub> Nb <sub>3</sub> [496], Ga <sub>2</sub> Ta <sub>3</sub> [497], Ge <sub>2</sub> Hf <sub>3</sub> [498], Hg <sub>2</sub> Sr <sub>3</sub> [499, 500]<br>InPd <sub>2</sub> Y <sub>2</sub> [501], In <sub>5</sub> Ti <sub>2</sub> [502], LiSi <sub>2</sub> Y <sub>2</sub> [503], PbPd <sub>2</sub> Y <sub>2</sub> [504], N <sub>2</sub> Re[505]                                                                                                                                                                                                                                                                                                                                                                                                                                                                                           |
| 129  | AgMgSb[506], AsNbSi[507], AsSiTa[508], BaMgSi[509], BiKMg[510], GeTeZr[511], MoNTa[512]                                                                                                                                                                                                                                                                                                                                                                                                                                                                                                                                                                                                                                                                                                                                                                                                                                                                                                                                                                                                                                                                             |
| 130  | AlMg <sub>4</sub> Si <sub>3</sub> [513], Se <sub>3</sub> Tl <sub>5</sub> [514]                                                                                                                                                                                                                                                                                                                                                                                                                                                                                                                                                                                                                                                                                                                                                                                                                                                                                                                                                                                                                                                                                      |
| 131  | OPd[515]                                                                                                                                                                                                                                                                                                                                                                                                                                                                                                                                                                                                                                                                                                                                                                                                                                                                                                                                                                                                                                                                                                                                                            |
| 136  | AlNb <sub>2</sub> [516], AlTa <sub>2</sub> [517], Bi <sub>2</sub> MgO <sub>6</sub> [518], O <sub>2</sub> Pb[519, 520], O <sub>2</sub> Pd[521], O <sub>2</sub> Pt[522], O <sub>2</sub> Re[523]                                                                                                                                                                                                                                                                                                                                                                                                                                                                                                                                                                                                                                                                                                                                                                                                                                                                                                                                                                       |
| 137  | As <sub>2</sub> Cd <sub>3</sub> [524, 525], Bi <sub>2</sub> Se <sub>3</sub> [526]                                                                                                                                                                                                                                                                                                                                                                                                                                                                                                                                                                                                                                                                                                                                                                                                                                                                                                                                                                                                                                                                                   |
| 139  | Ag <sub>2</sub> CaGe <sub>2</sub> [527], Ag <sub>2</sub> Ge <sub>2</sub> Sr[527], Ag <sub>2</sub> Si <sub>2</sub> Sr[528], Ag <sub>2</sub> Sn <sub>2</sub> Sr[529], Al <sub>2</sub> BaSi <sub>2</sub> [530], Al <sub>2</sub> Pb <sub>2</sub> Sr[531], Al <sub>3</sub> Nb[532]<br>Al <sub>3</sub> Ta[533], Al <sub>3</sub> Zr[534], Al <sub>4</sub> Ba[535], Au <sub>4</sub> CaCd <sub>2</sub> [536], BaBi <sub>4</sub> Cl <sub>2</sub> O <sub>6</sub> [537], BaIn <sub>4</sub> [538], Be <sub>12</sub> Pd[539], Be <sub>12</sub> Pt[539]<br>CaGa <sub>4</sub> [540], Ca <sub>11</sub> Sb <sub>10</sub> [541], Ga <sub>3</sub> Nb[542, 543], Ga <sub>3</sub> Ta[544], In <sub>4</sub> Sr[545], Pt <sub>3</sub> Sb[546], S <sub>2</sub> Ti[547], Sb <sub>10</sub> Sr <sub>11</sub> [548]<br>Si <sub>2</sub> W[549], ZnZr <sub>2</sub> [550], Ag <sub>2</sub> Lu[551], Au <sub>2</sub> Lu[552]                                                                                                                                                                                                                                                                         |
| 140  | AgCsF <sub>3</sub> [553], AgF <sub>3</sub> Rb[553], AgIn <sub>2</sub> [554], AlZr <sub>2</sub> [555], AuSe <sub>3</sub> Tl <sub>4</sub> [556], AuTl <sub>2</sub> [557], Au <sub>3</sub> Cd <sub>5</sub> [558]<br>Au <sub>4</sub> In <sub>2</sub> K[559], Au <sub>4</sub> In <sub>2</sub> Rb[559]<br>BGe <sub>2</sub> Nb <sub>5</sub> [560], BMo <sub>2</sub> [561], BTa <sub>2</sub> [562], BTi <sub>2</sub> [563], BW <sub>2</sub> [564], Ba[565], BeTa <sub>2</sub> [566], Bi <sub>3</sub> In <sub>4</sub> Pb[567]<br>Ca <sub>5</sub> Pt <sub>3</sub> [568], Ca <sub>5</sub> Si <sub>3</sub> [569]<br>Cs <sub>9</sub> InO <sub>4</sub> [570], GaHf <sub>2</sub> [571], GaPt <sub>3</sub> [572], GaZr <sub>2</sub> [573], Ga <sub>5</sub> Pd[574], GeHf <sub>2</sub> [575], Ge <sub>3</sub> Mo <sub>5</sub> [576]<br>Ge <sub>3</sub> Nb <sub>5</sub> [577], Ge <sub>3</sub> W <sub>5</sub> [578], Nb <sub>5</sub> SiSn <sub>2</sub> [579]<br>Nb <sub>5</sub> Si <sub>3</sub> [580], Pb <sub>3</sub> Sr <sub>5</sub> [581], PdTl <sub>2</sub> [582], SZr <sub>2</sub> [583]<br>Si <sub>3</sub> W <sub>5</sub> [584], Sr[585], Te <sub>3</sub> Tl <sub>5</sub> [586] |
| 163  | AlF <sub>6</sub> LiPd[587], F <sub>6</sub> GaLiPd[588], In <sub>2</sub> Pt <sub>3</sub> [589]                                                                                                                                                                                                                                                                                                                                                                                                                                                                                                                                                                                                                                                                                                                                                                                                                                                                                                                                                                                                                                                                       |
| 164  | AlCl <sub>3</sub> [590], CS <sub>2</sub> [591], CaHg <sub>2</sub> [592], CaSb <sub>2</sub> Zn <sub>2</sub> [593], Cl <sub>2</sub> Ti[594], HfTe <sub>2</sub> [595, 596], Hg <sub>7</sub> K <sub>2</sub> [597]<br>Hg <sub>7</sub> Rb <sub>2</sub> [597], OTi <sub>2</sub> [598], Sb <sub>2</sub> SrZn <sub>2</sub> [599], Se <sub>2</sub> Ti[600]                                                                                                                                                                                                                                                                                                                                                                                                                                                                                                                                                                                                                                                                                                                                                                                                                    |
| 166  | BaPb <sub>3</sub> [601], Be <sub>17</sub> Hf <sub>2</sub> [602], Be <sub>17</sub> Nb <sub>2</sub> [603], Be <sub>17</sub> Ta <sub>2</sub> [602], GeTe[604, 605], Pb <sub>2</sub> Pd <sub>3</sub> S <sub>2</sub> [606]<br>Pb <sub>2</sub> Pd <sub>3</sub> Se <sub>2</sub> [607], Po[608], SbSn[609]<br>AgInSe <sub>2</sub> [610], As <sub>3</sub> NaZn <sub>4</sub> [611], Bi <sub>4</sub> Te <sub>3</sub> [612], C <sub>3</sub> Al <sub>8</sub> N <sub>4</sub> [613], Cd <sub>4</sub> KP <sub>3</sub> [614], GeP <sub>3</sub> [615], In <sub>2</sub> Se <sub>3</sub> [616], Pd <sub>3</sub> Se <sub>2</sub> Tl <sub>2</sub><br>[617], Ag <sub>4</sub> Sb <sub>2</sub> Sr[618]                                                                                                                                                                                                                                                                                                                                                                                                                                                                                       |
| 167  | Al <sub>5</sub> Mo[619], Cs <sub>8</sub> Ga <sub>11</sub> [620], F <sub>3</sub> Mo[621], F <sub>3</sub> Pd[622], F <sub>3</sub> Ti[623], In <sub>11</sub> K <sub>8</sub> [624]<br>K <sub>8</sub> Tl <sub>11</sub> [625], Mo <sub>9</sub> S <sub>11</sub> Tl <sub>2</sub> [626], NPd <sub>3</sub> [627]                                                                                                                                                                                                                                                                                                                                                                                                                                                                                                                                                                                                                                                                                                                                                                                                                                                              |



Part 2 of Table IV:

|     |                                                                                                                                                                                                                                                                                                                                                                                                                                                                                                                                                                                                                                                                                                                                                                                                                                                                                                                                                                                                                                                                                                                                                                                                                                                                                                                                                                                                                                                                                                                                                                                                                                                                                                                                                                                                                                                                                                                                                                                                                                                                                                                                                                                                                                                                                                                                                                                                                                                                                                                                                                                                                                                                                                                                                                                                                                                                                                                                                                                                                                                                                                                                                             |
|-----|-------------------------------------------------------------------------------------------------------------------------------------------------------------------------------------------------------------------------------------------------------------------------------------------------------------------------------------------------------------------------------------------------------------------------------------------------------------------------------------------------------------------------------------------------------------------------------------------------------------------------------------------------------------------------------------------------------------------------------------------------------------------------------------------------------------------------------------------------------------------------------------------------------------------------------------------------------------------------------------------------------------------------------------------------------------------------------------------------------------------------------------------------------------------------------------------------------------------------------------------------------------------------------------------------------------------------------------------------------------------------------------------------------------------------------------------------------------------------------------------------------------------------------------------------------------------------------------------------------------------------------------------------------------------------------------------------------------------------------------------------------------------------------------------------------------------------------------------------------------------------------------------------------------------------------------------------------------------------------------------------------------------------------------------------------------------------------------------------------------------------------------------------------------------------------------------------------------------------------------------------------------------------------------------------------------------------------------------------------------------------------------------------------------------------------------------------------------------------------------------------------------------------------------------------------------------------------------------------------------------------------------------------------------------------------------------------------------------------------------------------------------------------------------------------------------------------------------------------------------------------------------------------------------------------------------------------------------------------------------------------------------------------------------------------------------------------------------------------------------------------------------------------------------|
| 176 | AgCd <sub>3</sub> F <sub>20</sub> Hf <sub>3</sub> [628], AgCd <sub>3</sub> F <sub>20</sub> Zr <sub>3</sub> [628], AgMo <sub>3</sub> Se <sub>3</sub> [629], AsNb <sub>3</sub> Te <sub>3</sub> [630]<br>CsMo <sub>3</sub> S <sub>3</sub> [631], CsMo <sub>3</sub> Se <sub>3</sub> [632], CsMo <sub>3</sub> Te <sub>3</sub> [633], InMo <sub>3</sub> Se <sub>3</sub> [186, 634]<br>InMo <sub>3</sub> Te <sub>3</sub> [186, 634], KMo <sub>3</sub> S <sub>3</sub> [634], KMo <sub>3</sub> Se <sub>3</sub> [186, 634], KMo <sub>3</sub> Te <sub>3</sub> [186, 635], LiMo <sub>3</sub> Se <sub>3</sub> [634]<br>Mo <sub>3</sub> NaSe <sub>3</sub> [186, 634], Mo <sub>3</sub> NaTe <sub>3</sub> [186, 634], Mo <sub>3</sub> RbS <sub>3</sub> [634], Mo <sub>3</sub> RbSe <sub>3</sub> [634, 636]<br>Mo <sub>3</sub> RbTe <sub>3</sub> [637], Mo <sub>3</sub> Se <sub>3</sub> Tl [186, 634], Mo <sub>6</sub> Se <sub>6</sub> Tl <sub>2</sub> [638], NbSe <sub>2</sub> [639]                                                                                                                                                                                                                                                                                                                                                                                                                                                                                                                                                                                                                                                                                                                                                                                                                                                                                                                                                                                                                                                                                                                                                                                                                                                                                                                                                                                                                                                                                                                                                                                                                                                                                                                                                                                                                                                                                                                                                                                                                                                                                                                                                                                        |
| 186 | HgPbSr [640], HgSnSr [640], CaHgSn [640], CaHgSn [640]                                                                                                                                                                                                                                                                                                                                                                                                                                                                                                                                                                                                                                                                                                                                                                                                                                                                                                                                                                                                                                                                                                                                                                                                                                                                                                                                                                                                                                                                                                                                                                                                                                                                                                                                                                                                                                                                                                                                                                                                                                                                                                                                                                                                                                                                                                                                                                                                                                                                                                                                                                                                                                                                                                                                                                                                                                                                                                                                                                                                                                                                                                      |
| 187 | AgN [641], CLiNaO <sub>3</sub> [642], CMo [643], CPt [644], CTa [644], CW [645]<br>InS <sub>2</sub> Ta [646], InSe <sub>2</sub> Ta [647], MoP [648], NNb [649], NPd [650], NW [651]<br>NZr [652], N <sub>2</sub> Pt [653], N <sub>2</sub> Ta [653], NbS [654], STa [655]<br>STi [656], TeZr [657]                                                                                                                                                                                                                                                                                                                                                                                                                                                                                                                                                                                                                                                                                                                                                                                                                                                                                                                                                                                                                                                                                                                                                                                                                                                                                                                                                                                                                                                                                                                                                                                                                                                                                                                                                                                                                                                                                                                                                                                                                                                                                                                                                                                                                                                                                                                                                                                                                                                                                                                                                                                                                                                                                                                                                                                                                                                           |
| 188 | I <sub>3</sub> LiSc [658]                                                                                                                                                                                                                                                                                                                                                                                                                                                                                                                                                                                                                                                                                                                                                                                                                                                                                                                                                                                                                                                                                                                                                                                                                                                                                                                                                                                                                                                                                                                                                                                                                                                                                                                                                                                                                                                                                                                                                                                                                                                                                                                                                                                                                                                                                                                                                                                                                                                                                                                                                                                                                                                                                                                                                                                                                                                                                                                                                                                                                                                                                                                                   |
| 189 | AlHfPt [659], AlPdY [660], AlPtZr [659], Al <sub>2</sub> Hf <sub>6</sub> Pt [661], AsPd <sub>2</sub> [139]<br>AuInY [662], GaPtZr [659], GePdSc [663], GePd <sub>2</sub> [664], GePt <sub>2</sub> [665], InPdY [666]<br>InPtSc [667], InPtY [668], MgPdY [669], NTa [670], PdTiY [671], PdYZn [672]<br>Pd <sub>2</sub> Si [673], PtSb <sub>2</sub> Zr <sub>6</sub> [674], Pt <sub>2</sub> Si [675]                                                                                                                                                                                                                                                                                                                                                                                                                                                                                                                                                                                                                                                                                                                                                                                                                                                                                                                                                                                                                                                                                                                                                                                                                                                                                                                                                                                                                                                                                                                                                                                                                                                                                                                                                                                                                                                                                                                                                                                                                                                                                                                                                                                                                                                                                                                                                                                                                                                                                                                                                                                                                                                                                                                                                          |
| 190 | AlHfPt [676], AlPtZr [677], B <sub>4</sub> Ga <sub>3</sub> Pt <sub>9</sub> [678], GaHfPd [679], GaPtZr [680], Li <sub>2</sub> Sb [681], PdScSn [682]                                                                                                                                                                                                                                                                                                                                                                                                                                                                                                                                                                                                                                                                                                                                                                                                                                                                                                                                                                                                                                                                                                                                                                                                                                                                                                                                                                                                                                                                                                                                                                                                                                                                                                                                                                                                                                                                                                                                                                                                                                                                                                                                                                                                                                                                                                                                                                                                                                                                                                                                                                                                                                                                                                                                                                                                                                                                                                                                                                                                        |
| 191 | Au <sub>2</sub> Ba [683], Au <sub>5</sub> K [684], Au <sub>5</sub> Rb [684], B <sub>2</sub> Mo [685], BaGa <sub>2</sub> [686], BaPd <sub>5</sub> [687], Be <sub>2</sub> Hf [688]<br>Be <sub>5</sub> Hf [689], Be <sub>5</sub> Zr [690], CaGa <sub>2</sub> [691], CaHg <sub>2</sub> [692], Hf [693], Hf <sub>2</sub> N <sub>3</sub> Ta [694], Hg [695]<br>LiNNa <sub>2</sub> [696], NNa <sub>3</sub> [697], NOTa [698], NTa [699], N <sub>3</sub> TaTi <sub>2</sub> [700], N <sub>3</sub> TaZr <sub>2</sub> [700], N <sub>4</sub> Ta <sub>2</sub> [699], S <sub>2</sub> Ti [701]                                                                                                                                                                                                                                                                                                                                                                                                                                                                                                                                                                                                                                                                                                                                                                                                                                                                                                                                                                                                                                                                                                                                                                                                                                                                                                                                                                                                                                                                                                                                                                                                                                                                                                                                                                                                                                                                                                                                                                                                                                                                                                                                                                                                                                                                                                                                                                                                                                                                                                                                                                             |
| 193 | AgIn <sub>3</sub> Zr <sub>5</sub> [702], AgPb <sub>3</sub> Zr <sub>5</sub> [703], AgSb <sub>3</sub> Zr <sub>5</sub> [704], AlSn <sub>3</sub> Zr <sub>5</sub> [705], Al <sub>3</sub> Hf <sub>5</sub> [706]<br>Al <sub>3</sub> Hf <sub>5</sub> N [707], Al <sub>3</sub> Ta <sub>5</sub> [708], Al <sub>3</sub> Zr <sub>5</sub> [709], Al <sub>4</sub> Zr <sub>5</sub> [710]<br>AsPb <sub>3</sub> Zr <sub>5</sub> [711], AsSb <sub>3</sub> Zr <sub>5</sub> [712], AsSn <sub>3</sub> Zr <sub>5</sub> [713], As <sub>3</sub> Ca <sub>5</sub> [714], As <sub>3</sub> Sr <sub>5</sub> [715]<br>BNb <sub>5</sub> Si <sub>3</sub> [716], BSn <sub>3</sub> Zr <sub>5</sub> [717], Ba <sub>3</sub> N [718], Ba <sub>5</sub> Bi <sub>3</sub> [719]<br>Ba <sub>5</sub> Sb <sub>3</sub> [719], Bi <sub>3</sub> Sr <sub>5</sub> [720], CSb <sub>3</sub> Zr <sub>5</sub> [721], CSn <sub>3</sub> Zr <sub>5</sub> [722], Ca <sub>5</sub> Sb <sub>3</sub> [723], CdPb <sub>3</sub> Zr <sub>5</sub> [724]<br>Cl <sub>3</sub> Ti [725, 726], Cl <sub>3</sub> Zr [726, 727], GaSn <sub>3</sub> Zr <sub>5</sub> [728], Ga <sub>3</sub> Hf <sub>3</sub> Nb <sub>2</sub> [729]<br>Ga <sub>3</sub> Nb <sub>5</sub> [730], Ga <sub>3</sub> Sc <sub>5</sub> [731], Ga <sub>3</sub> Ta <sub>5</sub> [732], Ga <sub>4</sub> Nb <sub>5</sub> [733], Ga <sub>4</sub> Ti <sub>5</sub> [734]<br>Ga <sub>4</sub> Zr <sub>5</sub> [734], GePb <sub>3</sub> Zr <sub>5</sub> [735], Ge <sub>3</sub> Mo <sub>5</sub> [736], Ge <sub>3</sub> Nb <sub>5</sub> [737]<br>Ge <sub>3</sub> Sc <sub>5</sub> [738], Ge <sub>3</sub> Ta <sub>5</sub> [739], Ge <sub>3</sub> Y <sub>5</sub> [740], HfI <sub>3</sub> [741, 742], Hf <sub>5</sub> Sb <sub>3</sub> Zn [743], Hf <sub>5</sub> Si <sub>3</sub> [744]<br>Hf <sub>5</sub> Sn <sub>3</sub> [706], Hf <sub>5</sub> Sn <sub>4</sub> [745], Hg <sub>3</sub> Mg <sub>5</sub> [746], I <sub>3</sub> Nb [747]<br>I <sub>3</sub> Ti [748, 749], I <sub>3</sub> Zr [750], InPb <sub>3</sub> Zr <sub>5</sub> [751], K <sub>3</sub> Nb <sub>8</sub> O <sub>21</sub> [752]<br>Mo <sub>5</sub> Si <sub>3</sub> [753], NSn <sub>3</sub> Zr <sub>5</sub> [754], N <sub>6</sub> Nb <sub>5</sub> [755], N <sub>6</sub> Ta <sub>5</sub> [756]<br>Nb <sub>5</sub> OPt <sub>3</sub> [757], Nb <sub>5</sub> PSi <sub>3</sub> [758], Nb <sub>5</sub> Si <sub>3</sub> [759], PPb <sub>3</sub> Zr <sub>5</sub> [760]<br>PSn <sub>3</sub> Zr <sub>5</sub> [761], P <sub>3</sub> Ti <sub>5</sub> [762], Pb <sub>3</sub> SbZr <sub>5</sub> [763], Pb <sub>3</sub> Sc <sub>5</sub> [764]<br>Pb <sub>3</sub> SeZr <sub>5</sub> [763], Pb <sub>3</sub> SiZr <sub>5</sub> [763], Pb <sub>3</sub> SnZr <sub>5</sub> [763], Pb <sub>3</sub> Y <sub>5</sub> [765]<br>SSb <sub>3</sub> Zr <sub>5</sub> [766], SSn <sub>3</sub> Zr <sub>5</sub> [767], Sb <sub>3</sub> SiZr <sub>5</sub> [768]<br>Sb <sub>3</sub> Sr <sub>5</sub> [769], Sb <sub>4</sub> Zr <sub>5</sub> [768], SeSn <sub>3</sub> Zr <sub>5</sub> [770], SiSn <sub>3</sub> Zr <sub>5</sub> [770]<br>Si <sub>3</sub> Ta <sub>5</sub> [771], Si <sub>3</sub> Y <sub>5</sub> [772], Sn <sub>4</sub> Zr <sub>5</sub> [745] |

Part 3 of Table IV:

|     |                                                                                                                                                                                                                                                                                                                                                                                                                                                                                                                                                                                                                                                                                                                                                                                                                                                                                                                                                                                                                                                                                                                                                                                                                                                                                                                                                                                                                                                                                                                                                                                                                                                                                                                                                                                                                                                                                                                                                                                   |
|-----|-----------------------------------------------------------------------------------------------------------------------------------------------------------------------------------------------------------------------------------------------------------------------------------------------------------------------------------------------------------------------------------------------------------------------------------------------------------------------------------------------------------------------------------------------------------------------------------------------------------------------------------------------------------------------------------------------------------------------------------------------------------------------------------------------------------------------------------------------------------------------------------------------------------------------------------------------------------------------------------------------------------------------------------------------------------------------------------------------------------------------------------------------------------------------------------------------------------------------------------------------------------------------------------------------------------------------------------------------------------------------------------------------------------------------------------------------------------------------------------------------------------------------------------------------------------------------------------------------------------------------------------------------------------------------------------------------------------------------------------------------------------------------------------------------------------------------------------------------------------------------------------------------------------------------------------------------------------------------------------|
| 194 | Ag[773],AgAsBa[773],AgAsSr[774],AgBaBi[775],AgBiCa[776],AgBiSr[777],AlPtTi[778],AlYZn[779]<br>Al <sub>4</sub> Mg <sub>2</sub> Zn <sub>3</sub> [780],Al <sub>5</sub> Ba <sub>4</sub> [781],AsAuBa[782],AsHf[783]<br>AsPdSr[784],AsPtSr[785],AsZr[786],AuBaSb[787],AuBiSr[787]<br>AuCaP[788],AuBaP[789],AuCaSb[788],AuKTe[790],AuNaTe[790],AuNa <sub>2</sub> Sn <sub>3</sub> [791],AuRbTe[792]<br>AuSbSr[793],AuSe[794],AuSn[795],B <sub>4</sub> Mo[796]<br>BaCdGe[797],BaGeZn[797],BaHgSn[797],AlTi <sub>3</sub> [798]<br>BaPbZn[797],BaPt[799],BaS <sub>3</sub> Ta[800],BaSe <sub>3</sub> Ta[800],BaSiZn[797],BaSn <sub>3</sub> [801],BaTl <sub>2</sub> [802]<br>BiNa <sub>3</sub> [803, 804],BiRb <sub>3</sub> [805],Br <sub>3</sub> RbTi[806],Br <sub>9</sub> Nb <sub>2</sub> Rb <sub>3</sub> [807]<br>Ca[776],CaHgPb[797],CaHgSn[776],CaHg <sub>3</sub> [808]<br>CaNa <sub>4</sub> Sn <sub>6</sub> [809],CaPbZn[776],CaPt <sub>2</sub> [810],CaSnZn[776],CdN[811],CdS <sub>2</sub> Ta[812],Cl <sub>3</sub> CsSc[813],Cl <sub>3</sub> CsTi[814]<br>Cl <sub>3</sub> RbTi[814], CsI <sub>3</sub> Ti[815]<br>GaTi <sub>3</sub> [816],GaYZn[817],Ga <sub>5</sub> Ta <sub>6</sub> [818],GeMg <sub>2</sub> [819],Hf <sub>2</sub> PSb[820],Hf <sub>2</sub> S[821],Hg <sub>3</sub> Sr[822],InMg <sub>3</sub> [823]<br>InMoS <sub>2</sub> [824],InTi <sub>3</sub> [825]<br>KSn <sub>2</sub> [826],LiTi[827],MgNa <sub>2</sub> Pb[828],MgNa <sub>2</sub> Sn[829],Mg <sub>2</sub> Si[830],Mg <sub>2</sub> Sn[831],NNb[832]<br>NPd[832],NPt[833],N <sub>2</sub> Pt[834],N <sub>2</sub> Ta[834],NaTi[835],NbS <sub>2</sub> [836]<br>NbSe <sub>2</sub> [836],O <sub>2</sub> [837],PSbTi <sub>2</sub> [838],PSbZr <sub>2</sub> [839],PTi[840],PbSrZn[841],PdTe[842]<br>Pd <sub>3</sub> Zr[843],PoSc[844],S <sub>2</sub> Ta[845],SbTi[846],Sc[847],SrTi <sub>2</sub> [848]<br>B <sub>2</sub> Re[849],Be <sub>2</sub> Re[850],C <sub>2</sub> Re[851],N <sub>2</sub> Re[852], Re[853],AsLaPd[854] |
| 205 | AsGa[855],AsIn[855]                                                                                                                                                                                                                                                                                                                                                                                                                                                                                                                                                                                                                                                                                                                                                                                                                                                                                                                                                                                                                                                                                                                                                                                                                                                                                                                                                                                                                                                                                                                                                                                                                                                                                                                                                                                                                                                                                                                                                               |
| 216 | AgAlLi <sub>2</sub> [856],AgBiLi <sub>2</sub> [856, 857],AgMgSb[858],AgLi <sub>2</sub> Sb[856, 857],AlBi[859],AsIn[860],AsTi[861],AuBiCa<br>[862]<br>AuBiLi <sub>2</sub> [863],AuInLi <sub>2</sub> [863],AuLiMgSn[864],AuPbY[865],BBi[861, 866],BiLiMg[867],CdLi <sub>2</sub> Pb[868],CdNa <sub>2</sub> Pb<br>[869]<br>CdPo[870],GaSb[871],GeInLi[872],GeTi <sub>3</sub> [873],HgSe[874],PTl[875],HgTe[876],InSb[860]<br>LiMgPdSb[877],LiMgPtSb [877],MoP[878],PoZn[879],CRe[880]                                                                                                                                                                                                                                                                                                                                                                                                                                                                                                                                                                                                                                                                                                                                                                                                                                                                                                                                                                                                                                                                                                                                                                                                                                                                                                                                                                                                                                                                                                 |
| 217 | Ge <sub>8</sub> Na <sub>6</sub> Pt <sub>8</sub> [881]                                                                                                                                                                                                                                                                                                                                                                                                                                                                                                                                                                                                                                                                                                                                                                                                                                                                                                                                                                                                                                                                                                                                                                                                                                                                                                                                                                                                                                                                                                                                                                                                                                                                                                                                                                                                                                                                                                                             |
| 218 | Al <sub>6</sub> K <sub>8</sub> O <sub>24</sub> Si <sub>6</sub> [882],Al <sub>6</sub> Na <sub>8</sub> O <sub>24</sub> Si <sub>6</sub> [883]                                                                                                                                                                                                                                                                                                                                                                                                                                                                                                                                                                                                                                                                                                                                                                                                                                                                                                                                                                                                                                                                                                                                                                                                                                                                                                                                                                                                                                                                                                                                                                                                                                                                                                                                                                                                                                        |
| 221 | AgSc[884],AgY[885],Ag <sub>3</sub> In[886],AlNTi <sub>3</sub> [887],AsSc[888],AsY[889],AuSc[884],AuY[890],Au <sub>3</sub> Li[891]<br>BPbSc <sub>3</sub> [892],BPd <sub>3</sub> Sc[893],BPd <sub>3</sub> Y[893],BPT <sub>3</sub> Y[893]<br>BaCd[894],BaHg[895],CCaPd <sub>3</sub> [896],CInY <sub>3</sub> [897],CTIY <sub>3</sub> [898]<br>C <sub>20</sub> [899],Ca[900],CaTe[901],Ca <sub>3</sub> NTl[902],Ca <sub>3</sub> Pb[903],CdSr[904],CsIO <sub>3</sub> [905],HfPd[906]<br>Hg <sub>3</sub> Zr[906],InNTi <sub>3</sub> [907],InSc <sub>3</sub> [908],In <sub>3</sub> Y[909],MgSr[910],MoO <sub>3</sub> Sr[911],NNb[912],NSc[913],PY[914],PbPd <sub>3</sub> [915]<br>PbTi[916],PdZr[917],Pd <sub>3</sub> Ti[918],Pd <sub>3</sub> Zr[919],PtTi[920],PtZr[921],Pt <sub>3</sub> Ti[922],SbSc[888],SbTi[923],SbY[924]<br>Se[925]                                                                                                                                                                                                                                                                                                                                                                                                                                                                                                                                                                                                                                                                                                                                                                                                                                                                                                                                                                                                                                                                                                                                                 |
| 223 | CaO <sub>4</sub> Pd <sub>3</sub> [926],CdO <sub>4</sub> Pd <sub>3</sub> [927],O <sub>4</sub> Pd <sub>3</sub> Sr[927], Pd <sub>3</sub> S <sub>4</sub> Y[928],PtTi <sub>3</sub> [929]                                                                                                                                                                                                                                                                                                                                                                                                                                                                                                                                                                                                                                                                                                                                                                                                                                                                                                                                                                                                                                                                                                                                                                                                                                                                                                                                                                                                                                                                                                                                                                                                                                                                                                                                                                                               |
| 224 | Ag <sub>2</sub> O[930]                                                                                                                                                                                                                                                                                                                                                                                                                                                                                                                                                                                                                                                                                                                                                                                                                                                                                                                                                                                                                                                                                                                                                                                                                                                                                                                                                                                                                                                                                                                                                                                                                                                                                                                                                                                                                                                                                                                                                            |
| 225 | AgAuCl <sub>6</sub> CS <sub>2</sub> [931],Ag <sub>2</sub> AlSc[932],Ag <sub>2</sub> InSc[932],Ag <sub>2</sub> InY[933],AsIn[934]<br>Be <sub>2</sub> Si[935],BiK <sub>3</sub> [936],Br <sub>6</sub> Cs <sub>2</sub> W[937],Br <sub>6</sub> Rb <sub>2</sub> W[937]<br>CTi[938],Ca <sub>2</sub> O <sub>6</sub> PdW[939],CdGeLi <sub>2</sub> [940],CdLi <sub>2</sub> Pb[940]<br>Cl <sub>6</sub> Cs <sub>2</sub> Mo[941],Cl <sub>6</sub> Cs <sub>2</sub> W[942],Cl <sub>6</sub> K <sub>2</sub> Mo[943],Cl <sub>6</sub> K <sub>2</sub> W[944]<br>Cl <sub>6</sub> MoTl <sub>2</sub> [945],Cl <sub>6</sub> Rb <sub>2</sub> W[946],Cl <sub>6</sub> Tl <sub>2</sub> W[947],F <sub>2</sub> Ti[948]<br>F <sub>6</sub> TiZr[949],GaPd <sub>2</sub> Sc[950],GeHgLi <sub>2</sub> [951],GeLi <sub>2</sub> Pd[952]<br>GeLi <sub>2</sub> Zn[953],Hf[954],HgPo[955],HgSe[956],HgTe[957],INaO <sub>6</sub> Pb <sub>2</sub> [958]<br>InP[959],InPd <sub>2</sub> Y[960],InPt <sub>2</sub> Sc[961],InSb[962],Li <sub>2</sub> MgPb[963],Li <sub>2</sub> SnZn[964]<br>Li <sub>3</sub> Tl[965],Mg <sub>2</sub> Pb[966],Mo[967],OPt[968],OTi[969]<br>OZr[970],Pd[971],Pt[972],Ti[973],Zr[974],LaN[975]                                                                                                                                                                                                                                                                                                                                                                                                                                                                                                                                                                                                                                                                                                                                                                                                       |
| 227 | AgBe <sub>2</sub> [976],Ag <sub>2</sub> Na[977],Al <sub>2</sub> Sc[978],As <sub>2</sub> Na[979]<br>AuIn <sub>2</sub> Na <sub>3</sub> [980],Au <sub>2</sub> Bi[981],Au <sub>2</sub> Na[982],Au <sub>2</sub> Pb[983],BaPt <sub>2</sub> [984]<br>Be <sub>2</sub> Nb[985],Be <sub>2</sub> Ta[986],Bi <sub>2</sub> Cs[987],Bi <sub>2</sub> K[987],Bi <sub>2</sub> Rb[987],CHf <sub>3</sub> Zn <sub>3</sub> [988]<br>CaLi <sub>2</sub> [989],CaPd <sub>2</sub> [990],CaPt <sub>2</sub> [991],CdLi[992]<br>CsGe <sub>17</sub> Na <sub>2</sub> [993],CsO <sub>6</sub> W <sub>2</sub> [994],Ge[995],Ge <sub>136</sub> K <sub>24</sub> [996]<br>HfMo <sub>2</sub> [997],HfW <sub>2</sub> [998],LiO <sub>4</sub> Ti <sub>2</sub> [999],LiPt <sub>2</sub> [1000],LiZn[1001],Mo <sub>2</sub> Zr[1002]<br>NaPt <sub>2</sub> [1003],Na <sub>2</sub> RbSi <sub>17</sub> [1004],Pd <sub>2</sub> Sr[1005],Pt <sub>2</sub> Sr[1005],Pt <sub>2</sub> Y[1006],Sn[1007],W <sub>2</sub> Zr[1008]                                                                                                                                                                                                                                                                                                                                                                                                                                                                                                                                                                                                                                                                                                                                                                                                                                                                                                                                                                                                         |
| 229 | Ba[291],Ca[1009],Hf[1010],Sr[1011],Ti[1012],Zr[1013]                                                                                                                                                                                                                                                                                                                                                                                                                                                                                                                                                                                                                                                                                                                                                                                                                                                                                                                                                                                                                                                                                                                                                                                                                                                                                                                                                                                                                                                                                                                                                                                                                                                                                                                                                                                                                                                                                                                              |

#### IV. ALL OF THE PREDICTED TOPOLOGICAL MATERIALS

We listed below all the predicted topological materials predicted by SI theory no matter whether they have clean or dirty Fermi surfaces, i.e. all the TIs from **Case 2** in Table V, all the TCIs from **Case 2** in Table VI and all the TSMs from **Case 3** in Table VII, respectively. We further list materials from **Cases 1** and **2**, but potentially with band crossings near the Fermi energy, in Table VIII.

Part 1 of all the predicted TIs:

TABLE V. All the topological insulators: Note that, due to band dispersions these materials might not be insulating in reality.

| $S\mathcal{G}$ | Topological insulators                                                                                                                                                                                                                                                                                                                                                                                                                                                                                                                                                                                                                                                                                                                                                                                                                                                                                                                                                                                                                                                                                                                                                                                                                                                                                                                                                                                                                                                                                                                                                                                                                                                                                                                                                                                                                                                                                                                                              |
|----------------|---------------------------------------------------------------------------------------------------------------------------------------------------------------------------------------------------------------------------------------------------------------------------------------------------------------------------------------------------------------------------------------------------------------------------------------------------------------------------------------------------------------------------------------------------------------------------------------------------------------------------------------------------------------------------------------------------------------------------------------------------------------------------------------------------------------------------------------------------------------------------------------------------------------------------------------------------------------------------------------------------------------------------------------------------------------------------------------------------------------------------------------------------------------------------------------------------------------------------------------------------------------------------------------------------------------------------------------------------------------------------------------------------------------------------------------------------------------------------------------------------------------------------------------------------------------------------------------------------------------------------------------------------------------------------------------------------------------------------------------------------------------------------------------------------------------------------------------------------------------------------------------------------------------------------------------------------------------------|
| <b>2</b>       | AgF <sub>6</sub> Pd., Ag <sub>2</sub> F <sub>5</sub> , As <sub>3</sub> Ca, As <sub>3</sub> Sr, BaMo <sub>6</sub> S <sub>8</sub> , Bi, Br <sub>5</sub> W, C <sub>5</sub> B, CaP <sub>3</sub> , CaMo <sub>6</sub> S <sub>8</sub> , Mo <sub>3</sub> S <sub>4</sub> , Ga <sub>31</sub> Mo <sub>6</sub> , Mo <sub>6</sub> S <sub>8</sub> Sr, O <sub>18</sub> Ti <sub>10</sub> , Re, Cl <sub>14</sub> Mo <sub>4</sub> O <sub>4</sub> Tl <sub>2</sub> , Bi <sub>9</sub> In <sub>6</sub> K <sub>11</sub> , AgO <sub>4</sub> S,                                                                                                                                                                                                                                                                                                                                                                                                                                                                                                                                                                                                                                                                                                                                                                                                                                                                                                                                                                                                                                                                                                                                                                                                                                                                                                                                                                                                                                              |
| <b>10</b>      | Te <sub>4</sub> TiZr,                                                                                                                                                                                                                                                                                                                                                                                                                                                                                                                                                                                                                                                                                                                                                                                                                                                                                                                                                                                                                                                                                                                                                                                                                                                                                                                                                                                                                                                                                                                                                                                                                                                                                                                                                                                                                                                                                                                                               |
| <b>11</b>      | Sn <sub>2</sub> SrZn <sub>2</sub> , Se <sub>3</sub> Ta <sub>2</sub> , AlAu, BBeLi, Au <sub>2</sub> BaSb <sub>2</sub> , CaSb <sub>2</sub> , Cl <sub>7</sub> CsTi <sub>2</sub> , GeHfPd, HfS <sub>3</sub> , MgZn <sub>2</sub> , Nb <sub>2</sub> Se <sub>3</sub> , Mo <sub>2</sub> S <sub>3</sub> , NbPt <sub>3</sub> , Ga <sub>5</sub> Pt, Bi <sub>7</sub> In <sub>3</sub> Pb <sub>4</sub> S <sub>18</sub> ,                                                                                                                                                                                                                                                                                                                                                                                                                                                                                                                                                                                                                                                                                                                                                                                                                                                                                                                                                                                                                                                                                                                                                                                                                                                                                                                                                                                                                                                                                                                                                          |
| <b>12</b>      | Al <sub>2</sub> Ge <sub>4</sub> Sr <sub>3</sub> , Ag <sub>4</sub> K <sub>2</sub> Se <sub>3</sub> , Al <sub>8</sub> Mo <sub>3</sub> , As <sub>3</sub> Ba, As <sub>3</sub> Sr, As <sub>4</sub> Nb <sub>7</sub> , Al <sub>2</sub> Ba <sub>5</sub> Ge <sub>7</sub> , BaSb <sub>3</sub> , BaTi <sub>4</sub> , Au <sub>2</sub> P <sub>3</sub> , Ba <sub>2</sub> Cd <sub>2</sub> Sb <sub>3</sub> , Ba <sub>2</sub> Mg <sub>3</sub> Si <sub>4</sub> , Ba <sub>3</sub> Li <sub>4</sub> Sn <sub>8</sub> , Bi <sub>16</sub> I <sub>4</sub> , Bi <sub>2</sub> Pd, Bi <sub>2</sub> Pd <sub>5</sub> , Bi <sub>2</sub> Pd <sub>3</sub> Se <sub>2</sub> , Bi <sub>2</sub> Pd <sub>3</sub> S <sub>2</sub> , Bi <sub>2</sub> HgS <sub>4</sub> , Ba <sub>2</sub> Hg <sub>3</sub> O <sub>14</sub> Pd <sub>7</sub> , Au <sub>8</sub> GaK <sub>4</sub> , Bi <sub>2</sub> Pb <sub>3</sub> S <sub>6</sub> , Bi <sub>4</sub> Pb <sub>7</sub> Se <sub>13</sub> , Ba <sub>11</sub> Bi <sub>14</sub> Cd <sub>8</sub> , Br <sub>4</sub> Cs <sub>2</sub> I <sub>2</sub> Pd, CKN, CaGa <sub>4</sub> , Cl <sub>3</sub> Ti, Cl <sub>10</sub> W <sub>2</sub> , Ga <sub>3</sub> Sc <sub>5</sub> , Ga <sub>7</sub> Rb, Hg, Hg <sub>2</sub> Sn <sub>2</sub> Sr, Li <sub>2</sub> Si, Li <sub>8</sub> Pb <sub>3</sub> , Mg <sub>5</sub> Si <sub>6</sub> , Mg <sub>2</sub> Si <sub>10</sub> Sr <sub>11</sub> , Nb <sub>2</sub> PdSe <sub>6</sub> , Nb <sub>2</sub> PdS <sub>6</sub> , Nb <sub>2</sub> Te <sub>3</sub> , Nb <sub>2</sub> PdS <sub>5</sub> , OTi, O <sub>13</sub> Sr <sub>2</sub> Ti <sub>6</sub> , Mg <sub>4</sub> Zn <sub>7</sub> , P <sub>3</sub> Sr, PdSe <sub>6</sub> Ta <sub>2</sub> , Nb <sub>8</sub> PtSe <sub>20</sub> , PtTe, P <sub>4</sub> Ti <sub>7</sub> , Pt <sub>3</sub> Te <sub>4</sub> , Sc <sub>2</sub> Zr, PtSe <sub>7</sub> Ta <sub>2</sub> , Te, Se <sub>4</sub> Ti <sub>11</sub> , Sc <sub>8</sub> Te <sub>3</sub> , Cl <sub>2</sub> La <sub>3</sub> Si <sub>3</sub> , |
| <b>13</b>      | Cl <sub>3</sub> NbSe, I <sub>6</sub> Nb <sub>2</sub> Te <sub>2</sub> , Br <sub>6</sub> Nb <sub>2</sub> Se <sub>2</sub> , Br <sub>3</sub> NbSe,                                                                                                                                                                                                                                                                                                                                                                                                                                                                                                                                                                                                                                                                                                                                                                                                                                                                                                                                                                                                                                                                                                                                                                                                                                                                                                                                                                                                                                                                                                                                                                                                                                                                                                                                                                                                                      |
| <b>14</b>      | As <sub>2</sub> Pt <sub>2</sub> Sr, Ag <sub>2</sub> Te, BK <sub>3</sub> S <sub>3</sub> , BeLiN, BaNb <sub>2</sub> O <sub>6</sub> , Ba <sub>3</sub> P <sub>14</sub> , B <sub>2</sub> S <sub>3</sub> , Au <sub>4</sub> Li, As <sub>2</sub> F <sub>8</sub> O <sub>2</sub> Rb <sub>2</sub> , Bi, Cl <sub>2</sub> Te <sub>3</sub> , O <sub>3</sub> Pb <sub>2</sub> , O <sub>3</sub> S, O <sub>2</sub> Ti, Br <sub>2</sub> O <sub>5</sub> Sb <sub>4</sub> , Cl <sub>2</sub> O <sub>5</sub> Sb <sub>4</sub> , FGaO <sub>3</sub> Te, Cl <sub>4</sub> Hg <sub>4</sub> L <sub>2</sub> S, Rb <sub>2</sub> S <sub>7</sub> Sb <sub>4</sub> , HfO <sub>2</sub> , NOTa, Cl <sub>6</sub> Hg <sub>3</sub> S <sub>2</sub> Zr,                                                                                                                                                                                                                                                                                                                                                                                                                                                                                                                                                                                                                                                                                                                                                                                                                                                                                                                                                                                                                                                                                                                                                                                                                                                         |
| <b>15</b>      | MoP <sub>4</sub> , O <sub>5</sub> Ti <sub>3</sub> , STa <sub>6</sub> , Re <sub>2</sub> Sc <sub>3</sub> Si <sub>4</sub> , Cl <sub>6</sub> ReTe <sub>8</sub> ,                                                                                                                                                                                                                                                                                                                                                                                                                                                                                                                                                                                                                                                                                                                                                                                                                                                                                                                                                                                                                                                                                                                                                                                                                                                                                                                                                                                                                                                                                                                                                                                                                                                                                                                                                                                                        |
| <b>47</b>      | Cd <sub>2</sub> Zr <sub>3</sub> , P <sub>3</sub> Pd <sub>3</sub> Sr <sub>2</sub> ,                                                                                                                                                                                                                                                                                                                                                                                                                                                                                                                                                                                                                                                                                                                                                                                                                                                                                                                                                                                                                                                                                                                                                                                                                                                                                                                                                                                                                                                                                                                                                                                                                                                                                                                                                                                                                                                                                  |
| <b>50</b>      | C,                                                                                                                                                                                                                                                                                                                                                                                                                                                                                                                                                                                                                                                                                                                                                                                                                                                                                                                                                                                                                                                                                                                                                                                                                                                                                                                                                                                                                                                                                                                                                                                                                                                                                                                                                                                                                                                                                                                                                                  |
| <b>51</b>      | AuI <sub>2</sub> Te <sub>2</sub> , Au <sub>3</sub> Rb <sub>2</sub> Tl, PtTi, AlPt <sub>2</sub> , CB <sub>2</sub> U, La <sub>2</sub> Se <sub>9</sub> U <sub>2</sub> ,                                                                                                                                                                                                                                                                                                                                                                                                                                                                                                                                                                                                                                                                                                                                                                                                                                                                                                                                                                                                                                                                                                                                                                                                                                                                                                                                                                                                                                                                                                                                                                                                                                                                                                                                                                                                |
| <b>52</b>      | Ca <sub>2</sub> GeIn <sub>2</sub> Sr, F <sub>7</sub> KPdZr,                                                                                                                                                                                                                                                                                                                                                                                                                                                                                                                                                                                                                                                                                                                                                                                                                                                                                                                                                                                                                                                                                                                                                                                                                                                                                                                                                                                                                                                                                                                                                                                                                                                                                                                                                                                                                                                                                                         |
| <b>55</b>      | Al <sub>2</sub> Bi <sub>6</sub> Ca <sub>5</sub> , C <sub>2</sub> B <sub>2</sub> Sc, Se <sub>2</sub> Ti <sub>9</sub> , O <sub>8</sub> W <sub>3</sub> , InLa <sub>2</sub> Si <sub>2</sub> , B <sub>4</sub> MoU, B <sub>4</sub> UW, B <sub>6</sub> U <sub>2</sub> W, ReSi <sub>2</sub> Zr, HfReSi <sub>2</sub> , Bi <sub>6</sub> In <sub>2</sub> Sr <sub>5</sub> ,                                                                                                                                                                                                                                                                                                                                                                                                                                                                                                                                                                                                                                                                                                                                                                                                                                                                                                                                                                                                                                                                                                                                                                                                                                                                                                                                                                                                                                                                                                                                                                                                     |
| <b>57</b>      | STa <sub>2</sub> ,                                                                                                                                                                                                                                                                                                                                                                                                                                                                                                                                                                                                                                                                                                                                                                                                                                                                                                                                                                                                                                                                                                                                                                                                                                                                                                                                                                                                                                                                                                                                                                                                                                                                                                                                                                                                                                                                                                                                                  |
| <b>58</b>      | Ge <sub>6</sub> Li <sub>2</sub> Sr <sub>4</sub> , Ca <sub>2</sub> Ge <sub>3</sub> Li, S <sub>2</sub> Ti, Bi <sub>2</sub> Hf, Cl <sub>16</sub> Ti <sub>7</sub> , In <sub>2</sub> Se, Br <sub>16</sub> Ti <sub>7</sub> , C <sub>3</sub> Al <sub>2</sub> Th <sub>2</sub> , Au <sub>8</sub> Sn <sub>3</sub> Sr <sub>3</sub> , SeTi <sub>2</sub> , SZr <sub>2</sub> , In <sub>2</sub> Te,                                                                                                                                                                                                                                                                                                                                                                                                                                                                                                                                                                                                                                                                                                                                                                                                                                                                                                                                                                                                                                                                                                                                                                                                                                                                                                                                                                                                                                                                                                                                                                                |
| <b>59</b>      | Ag <sub>3</sub> Sb, Au <sub>3</sub> In, Au <sub>3</sub> In <sub>3</sub> Sr, Au <sub>3</sub> KSn <sub>3</sub> , AuRb <sub>3</sub> Sn <sub>4</sub> , AuPb <sub>4</sub> Rb <sub>3</sub> , Au <sub>3</sub> Lu, AuCs <sub>3</sub> Pb <sub>4</sub> ,                                                                                                                                                                                                                                                                                                                                                                                                                                                                                                                                                                                                                                                                                                                                                                                                                                                                                                                                                                                                                                                                                                                                                                                                                                                                                                                                                                                                                                                                                                                                                                                                                                                                                                                      |
| <b>60</b>      | CW <sub>2</sub> , O <sub>2</sub> Pb, Au <sub>2</sub> Pb, MgO <sub>3</sub> Si,                                                                                                                                                                                                                                                                                                                                                                                                                                                                                                                                                                                                                                                                                                                                                                                                                                                                                                                                                                                                                                                                                                                                                                                                                                                                                                                                                                                                                                                                                                                                                                                                                                                                                                                                                                                                                                                                                       |
| <b>61</b>      | AuSn <sub>2</sub> , Bi <sub>2</sub> Pt,                                                                                                                                                                                                                                                                                                                                                                                                                                                                                                                                                                                                                                                                                                                                                                                                                                                                                                                                                                                                                                                                                                                                                                                                                                                                                                                                                                                                                                                                                                                                                                                                                                                                                                                                                                                                                                                                                                                             |
| <b>62</b>      | AsCdNa, AlPdY, AlPtY, As <sub>2</sub> Hf, As <sub>2</sub> Zr, As <sub>2</sub> Hf <sub>3</sub> , Ba <sub>2</sub> Pb, As <sub>3</sub> Sc <sub>5</sub> , Ba <sub>2</sub> Si, As <sub>3</sub> Nb <sub>5</sub> , FSeY, Bi <sub>3</sub> Sc <sub>5</sub> , Bi <sub>3</sub> Y <sub>5</sub> , GaPtY, GaPdSc, GaPtSc, GaPdY, GeHfPt, Ga <sub>2</sub> Pd <sub>5</sub> , PPtSc, P <sub>2</sub> Zr, P <sub>2</sub> Ti,                                                                                                                                                                                                                                                                                                                                                                                                                                                                                                                                                                                                                                                                                                                                                                                                                                                                                                                                                                                                                                                                                                                                                                                                                                                                                                                                                                                                                                                                                                                                                           |

Part 2 of all the predicted TIs:

|           |                                                                                                                                                                                                                                                                                                                                                                                                                                                                                                                                                                                                                                                                                                                                                                                                                                                                                                                                                                                                                                                                                                                                                                                                                                                                                                                                                                                                                                                                                                                                                                                                                                                                                                                                                                                                     |
|-----------|-----------------------------------------------------------------------------------------------------------------------------------------------------------------------------------------------------------------------------------------------------------------------------------------------------------------------------------------------------------------------------------------------------------------------------------------------------------------------------------------------------------------------------------------------------------------------------------------------------------------------------------------------------------------------------------------------------------------------------------------------------------------------------------------------------------------------------------------------------------------------------------------------------------------------------------------------------------------------------------------------------------------------------------------------------------------------------------------------------------------------------------------------------------------------------------------------------------------------------------------------------------------------------------------------------------------------------------------------------------------------------------------------------------------------------------------------------------------------------------------------------------------------------------------------------------------------------------------------------------------------------------------------------------------------------------------------------------------------------------------------------------------------------------------------------|
| <b>62</b> | GeMoZr, PdSiZr, PdSiTi, PbSr <sub>2</sub> , PtSiTi, PtSnSr, PtSiZr, GePdZr, Ca, GePtZr, GeZr, CaCdPd, SiZr, Sb <sub>2</sub> SrZn, SiSr, CaCdPt, SiTi, Ge <sub>2</sub> Mo, SrZn, Ge <sub>2</sub> Li <sub>3</sub> Na, Ge <sub>2</sub> W, Ge <sub>2</sub> InLiSr <sub>2</sub> , Ge <sub>3</sub> Pt <sub>2</sub> , CaGePt, CaMgPd, Ge <sub>4</sub> Hf <sub>3</sub> Nb <sub>2</sub> , PdSc <sub>6</sub> Te <sub>2</sub> , Ge <sub>4</sub> Ti <sub>5</sub> , HfNbP, SeTi <sub>2</sub> , CaPbPd, CaPbPt, CaPdSn, HfP <sub>2</sub> , CaPtSn, HfSi, CaPtSi, Ca <sub>2</sub> Hg, HgMg <sub>2</sub> , Hf <sub>3</sub> P <sub>2</sub> , Ca <sub>3</sub> Pd, Ca <sub>3</sub> GeO, Pd <sub>9</sub> Si <sub>2</sub> , Pb <sub>4</sub> Sr <sub>5</sub> , CdGeSr, CdNaSb, CdPtSr, Ca <sub>2</sub> Pt <sub>3</sub> Sn <sub>5</sub> , Ge <sub>6</sub> Sr <sub>7</sub> , Mg <sub>2</sub> Pb, NNa <sub>3</sub> , N <sub>5</sub> Ta <sub>3</sub> , Mo <sub>4</sub> P <sub>3</sub> , NbPZr, Nb <sub>5</sub> P <sub>3</sub> , AuLa, PdTh, AlLaPt, AlLuPt, GaLuPd, GaLaPd, GaLaPt, GaLuPt, Se <sub>2</sub> U, LaPpt, STeU, SeTeU, S <sub>3</sub> U <sub>2</sub> , S <sub>3</sub> Th <sub>2</sub> , Se <sub>3</sub> U <sub>2</sub> , Te <sub>3</sub> U <sub>2</sub> , CaSe <sub>5</sub> U <sub>2</sub> , S <sub>5</sub> TiU <sub>2</sub> , PbS <sub>5</sub> U <sub>2</sub> , Se <sub>5</sub> U <sub>3</sub> , PbSe <sub>5</sub> U <sub>2</sub> , Sn <sub>4</sub> Th <sub>5</sub> , La <sub>2</sub> S <sub>5</sub> U, La <sub>2</sub> Se <sub>5</sub> U, Te <sub>5</sub> U <sub>3</sub> , SrZn <sub>5</sub> , Sc <sub>2</sub> Te, PdTe <sub>2</sub> Y <sub>6</sub> , Pt <sub>4</sub> Sr <sub>5</sub> , TeZr <sub>2</sub> , Ba <sub>7</sub> Ge <sub>6</sub> , Pt <sub>3</sub> Sr <sub>7</sub> , GePdTi, AlAuCa, HfPdSi, HfPtSi, |
| <b>63</b> | AlBMo, Ag <sub>2</sub> Si, AlBW, AlSc, AlY, AgS <sub>3</sub> Ta, As <sub>2</sub> BaPd, AlHf <sub>3</sub> N, AuIn <sub>2</sub> Na, AuClTe <sub>2</sub> , BNb, B <sub>2</sub> Ta, BaCd <sub>2</sub> Pt, BaIn, As <sub>3</sub> Nb <sub>4</sub> , BaIn <sub>2</sub> Pt, BePd <sub>3</sub> , BaZn <sub>5</sub> , Ba <sub>3</sub> Ge <sub>5</sub> , B <sub>7</sub> WY <sub>3</sub> , Ba <sub>3</sub> Sn <sub>5</sub> , CB <sub>3</sub> Nb <sub>3</sub> , CaSi, CaZn, Cd <sub>2</sub> PdSr, CaIn <sub>4</sub> Pd, Ca <sub>2</sub> Sn <sub>6</sub> Zn <sub>3</sub> , GaSc, Ga, GaY, GeNa <sub>2</sub> Zn, Ge <sub>2</sub> Hf, HfPd, HfSi <sub>2</sub> , InSb, HfTe <sub>5</sub> , In <sub>4</sub> PdSr, In <sub>4</sub> PbSr <sub>3</sub> , Mg <sub>2</sub> PdSr, In <sub>2</sub> PtSr, In <sub>4</sub> PtSr, PdZr, Pd <sub>3</sub> Ti <sub>2</sub> , Si <sub>2</sub> Zr, SiZr, SnTi <sub>3</sub> , Sn <sub>4</sub> Sr, TiZn <sub>16</sub> , Tl <sub>5</sub> Y <sub>3</sub> , Sn <sub>5</sub> Sr <sub>3</sub> , Mo <sub>9</sub> Se <sub>11</sub> , U, AuLa, GaLu, GaLa, PtTh, Ge <sub>2</sub> U, Sn <sub>2</sub> Th, Ge <sub>2</sub> Th, BNU, AlLa, Te <sub>3</sub> U, LiLuSn <sub>2</sub> , LaLiSn <sub>2</sub> , La <sub>2</sub> SnZn <sub>5</sub> , GaU, In <sub>5</sub> La <sub>3</sub> , Lu <sub>3</sub> Tl <sub>5</sub> , Ge <sub>6</sub> La <sub>2</sub> Zn <sub>3</sub> , O <sub>8</sub> U <sub>3</sub> , Al <sub>2</sub> BaSi <sub>2</sub> , BaPdSb <sub>2</sub> , Te <sub>5</sub> Zr, As <sub>4</sub> Cd <sub>5</sub> Rb <sub>2</sub> , Ge <sub>8</sub> Na <sub>15</sub> PSn,                                                                                                                                                                                                                     |
| <b>64</b> | As, AgNO <sub>3</sub> , Ba <sub>2</sub> Bi <sub>4</sub> Cd <sub>3</sub> , Cs, Ga, Ge, K, Rb, Pd <sub>8</sub> Sn <sub>24</sub> , PdSn <sub>3</sub> , LiTl, Sn <sub>3</sub> Ti <sub>2</sub> , C <sub>2</sub> B <sub>2</sub> Mg, Br <sub>16</sub> W <sub>6</sub> , Ba <sub>2</sub> Ca <sub>2</sub> Sn <sub>6</sub> ,                                                                                                                                                                                                                                                                                                                                                                                                                                                                                                                                                                                                                                                                                                                                                                                                                                                                                                                                                                                                                                                                                                                                                                                                                                                                                                                                                                                                                                                                                   |
| <b>65</b> | Al <sub>2</sub> Ti, Ag <sub>3</sub> Te <sub>2</sub> Tl, CBY, Ga <sub>2</sub> Zr, Ga <sub>2</sub> Sc, HfPd <sub>5</sub> , Li <sub>7</sub> Sn <sub>2</sub> , Br <sub>2</sub> Cd <sub>2</sub> Hg <sub>2</sub> S <sub>2</sub> , Ba <sub>3</sub> Ge <sub>4</sub> , Ge <sub>2</sub> U, Ge <sub>2</sub> Th, LaSn <sub>2</sub> , AlB <sub>4</sub> Lu, Ge <sub>2</sub> PbSr <sub>2</sub> , PZr <sub>2</sub> ,                                                                                                                                                                                                                                                                                                                                                                                                                                                                                                                                                                                                                                                                                                                                                                                                                                                                                                                                                                                                                                                                                                                                                                                                                                                                                                                                                                                                |
| <b>66</b> | I <sub>3</sub> Th,                                                                                                                                                                                                                                                                                                                                                                                                                                                                                                                                                                                                                                                                                                                                                                                                                                                                                                                                                                                                                                                                                                                                                                                                                                                                                                                                                                                                                                                                                                                                                                                                                                                                                                                                                                                  |
| <b>69</b> | Be <sub>2</sub> Zn, Si <sub>2</sub> Ti, Cs <sub>2</sub> Pt <sub>3</sub> Se <sub>6</sub> U, Cs <sub>2</sub> Pt <sub>3</sub> S <sub>6</sub> U,                                                                                                                                                                                                                                                                                                                                                                                                                                                                                                                                                                                                                                                                                                                                                                                                                                                                                                                                                                                                                                                                                                                                                                                                                                                                                                                                                                                                                                                                                                                                                                                                                                                        |
| <b>70</b> | NbSn <sub>2</sub> , Si <sub>2</sub> Ti, Sn <sub>2</sub> Zr, SbSnTi, Rb, Sn <sub>2</sub> Ta, P <sub>2</sub> S <sub>7</sub> U, Ge <sub>2</sub> Ti,                                                                                                                                                                                                                                                                                                                                                                                                                                                                                                                                                                                                                                                                                                                                                                                                                                                                                                                                                                                                                                                                                                                                                                                                                                                                                                                                                                                                                                                                                                                                                                                                                                                    |
| <b>71</b> | Al <sub>2</sub> Ba <sub>3</sub> Ge <sub>2</sub> , Al <sub>2</sub> Ba <sub>3</sub> Si <sub>2</sub> , Al <sub>2</sub> Ba <sub>3</sub> Sn <sub>2</sub> , Al <sub>2</sub> Ca <sub>3</sub> Si <sub>2</sub> , Al <sub>2</sub> Si <sub>2</sub> Sr <sub>3</sub> , Ag <sub>3</sub> Ga <sub>8</sub> Y <sub>3</sub> , AsTeTi, Al <sub>2</sub> Ge <sub>2</sub> Sr <sub>3</sub> , Al <sub>2</sub> Sn <sub>2</sub> Sr <sub>3</sub> , CdO <sub>6</sub> Pt <sub>3</sub> , Ca <sub>3</sub> Ga <sub>8</sub> , Mo <sub>3</sub> Ti, MoPt <sub>2</sub> , Ga <sub>9</sub> Pt <sub>2</sub> Y <sub>3</sub> , Pt <sub>2</sub> W, Ge <sub>5</sub> Ti <sub>6</sub> , Hf <sub>27</sub> P <sub>16</sub> , C <sub>3</sub> Si <sub>2</sub> U <sub>3</sub> , Te <sub>2</sub> U, Nb <sub>6</sub> Sn <sub>5</sub> , N <sub>2</sub> Re, Sn, Pd <sub>2</sub> Ti, Br <sub>2</sub> Ca <sub>3</sub> Si,                                                                                                                                                                                                                                                                                                                                                                                                                                                                                                                                                                                                                                                                                                                                                                                                                                                                                                                                    |
| <b>72</b> | Ga <sub>2</sub> Mg <sub>5</sub> , In <sub>2</sub> Mg <sub>5</sub> , Pb <sub>5</sub> Sc <sub>6</sub> , Br <sub>2</sub> Hg <sub>5</sub> O <sub>4</sub> ,                                                                                                                                                                                                                                                                                                                                                                                                                                                                                                                                                                                                                                                                                                                                                                                                                                                                                                                                                                                                                                                                                                                                                                                                                                                                                                                                                                                                                                                                                                                                                                                                                                              |
| <b>73</b> | AlAs <sub>2</sub> Li <sub>3</sub> , Bi <sub>3</sub> K <sub>3</sub> Na <sub>2</sub> Sn,                                                                                                                                                                                                                                                                                                                                                                                                                                                                                                                                                                                                                                                                                                                                                                                                                                                                                                                                                                                                                                                                                                                                                                                                                                                                                                                                                                                                                                                                                                                                                                                                                                                                                                              |
| <b>74</b> | Au <sub>2</sub> Ca, Ag <sub>2</sub> Ca, Ge, BaIn <sub>2</sub> , Si, Ba <sub>2</sub> O <sub>7</sub> U <sub>2</sub> ,                                                                                                                                                                                                                                                                                                                                                                                                                                                                                                                                                                                                                                                                                                                                                                                                                                                                                                                                                                                                                                                                                                                                                                                                                                                                                                                                                                                                                                                                                                                                                                                                                                                                                 |
| <b>82</b> | AsPd <sub>3</sub> , GeTi <sub>3</sub> , Mo <sub>3</sub> P, TeZr <sub>3</sub> , SbZr <sub>3</sub> , GeTa <sub>3</sub> , Te <sub>3</sub> Tl <sub>5</sub> , PW <sub>3</sub> ,                                                                                                                                                                                                                                                                                                                                                                                                                                                                                                                                                                                                                                                                                                                                                                                                                                                                                                                                                                                                                                                                                                                                                                                                                                                                                                                                                                                                                                                                                                                                                                                                                          |
| <b>85</b> | Se <sub>2</sub> U,                                                                                                                                                                                                                                                                                                                                                                                                                                                                                                                                                                                                                                                                                                                                                                                                                                                                                                                                                                                                                                                                                                                                                                                                                                                                                                                                                                                                                                                                                                                                                                                                                                                                                                                                                                                  |

Part 3 of all the predicted TIs:

|            |                                                                                                                                                                                                                                                                                                                                                                                                                                                                                                                                                                                                                                                                                                                                                                                                                                                                                                                                                                                                                                                                                                                                                                                                         |
|------------|---------------------------------------------------------------------------------------------------------------------------------------------------------------------------------------------------------------------------------------------------------------------------------------------------------------------------------------------------------------------------------------------------------------------------------------------------------------------------------------------------------------------------------------------------------------------------------------------------------------------------------------------------------------------------------------------------------------------------------------------------------------------------------------------------------------------------------------------------------------------------------------------------------------------------------------------------------------------------------------------------------------------------------------------------------------------------------------------------------------------------------------------------------------------------------------------------------|
| <b>86</b>  | GeTa <sub>3</sub> , GeNb <sub>3</sub> , Nb <sub>3</sub> Si,                                                                                                                                                                                                                                                                                                                                                                                                                                                                                                                                                                                                                                                                                                                                                                                                                                                                                                                                                                                                                                                                                                                                             |
| <b>87</b>  | Se <sub>4</sub> Ti <sub>5</sub> , As <sub>4</sub> Mo <sub>5</sub> , Te <sub>4</sub> Zr <sub>5</sub> , Hf <sub>5</sub> Te <sub>4</sub> , O <sub>5</sub> Ti <sub>4</sub> , Te <sub>4</sub> Ti <sub>5</sub> ,                                                                                                                                                                                                                                                                                                                                                                                                                                                                                                                                                                                                                                                                                                                                                                                                                                                                                                                                                                                              |
| <b>88</b>  | CaO <sub>4</sub> Se, GeO <sub>4</sub> U, Pd <sub>2</sub> S <sub>4</sub> U, O <sub>24</sub> Re <sub>4</sub> Sr <sub>11</sub> ,                                                                                                                                                                                                                                                                                                                                                                                                                                                                                                                                                                                                                                                                                                                                                                                                                                                                                                                                                                                                                                                                           |
| <b>113</b> | GaNb <sub>4</sub> S <sub>8</sub> ,                                                                                                                                                                                                                                                                                                                                                                                                                                                                                                                                                                                                                                                                                                                                                                                                                                                                                                                                                                                                                                                                                                                                                                      |
| <b>114</b> | Pd <sub>4</sub> S,                                                                                                                                                                                                                                                                                                                                                                                                                                                                                                                                                                                                                                                                                                                                                                                                                                                                                                                                                                                                                                                                                                                                                                                      |
| <b>118</b> | B,                                                                                                                                                                                                                                                                                                                                                                                                                                                                                                                                                                                                                                                                                                                                                                                                                                                                                                                                                                                                                                                                                                                                                                                                      |
| <b>121</b> | Ag <sub>2</sub> S <sub>4</sub> SnZn, Mo <sub>3</sub> P, AuPb <sub>3</sub> , AsHgS <sub>3</sub> Tl,                                                                                                                                                                                                                                                                                                                                                                                                                                                                                                                                                                                                                                                                                                                                                                                                                                                                                                                                                                                                                                                                                                      |
| <b>122</b> | As <sub>2</sub> SnZn, AgInSe <sub>2</sub> , As <sub>2</sub> CdGe, As <sub>2</sub> CdSn, CdSb <sub>2</sub> Sn, F <sub>5</sub> U,                                                                                                                                                                                                                                                                                                                                                                                                                                                                                                                                                                                                                                                                                                                                                                                                                                                                                                                                                                                                                                                                         |
| <b>123</b> | BiLi, BiNa, ClNa <sub>3</sub> , HgTi, ClNa <sub>2</sub> , MgPt <sub>3</sub> , AgPPd <sub>5</sub> , BaGe <sub>3</sub> Mg <sub>4</sub> , Pd <sub>5</sub> Ti <sub>3</sub> , Hf <sub>5</sub> Pb,<br>As <sub>2</sub> BaOTi <sub>2</sub> , HgZr, MoPt <sub>3</sub> , N <sub>3</sub> Rb,                                                                                                                                                                                                                                                                                                                                                                                                                                                                                                                                                                                                                                                                                                                                                                                                                                                                                                                       |
| <b>125</b> | Pb <sub>4</sub> Pt,                                                                                                                                                                                                                                                                                                                                                                                                                                                                                                                                                                                                                                                                                                                                                                                                                                                                                                                                                                                                                                                                                                                                                                                     |
| <b>127</b> | CdGe <sub>2</sub> Y <sub>2</sub> , Ca <sub>2</sub> Ge <sub>2</sub> Sn, CsI <sub>3</sub> Sn, Hf <sub>3</sub> In <sub>4</sub> , GaPt <sub>3</sub> , AlPt <sub>3</sub> , B <sub>4</sub> Y, Pt <sub>3</sub> Si, B <sub>4</sub> La, B <sub>4</sub> U,<br>B <sub>4</sub> Lu, Si <sub>2</sub> Th <sub>3</sub> , CB <sub>2</sub> Lu, In <sub>4</sub> Ti <sub>3</sub> ,                                                                                                                                                                                                                                                                                                                                                                                                                                                                                                                                                                                                                                                                                                                                                                                                                                          |
| <b>129</b> | CdTi, Sc, SeTi, HfSb <sub>2</sub> , AgSb <sub>2</sub> Y, BaGeMg, BaMgSn, CaGaN, BaSn <sub>2</sub> Zn <sub>2</sub> , Al <sub>2</sub> Au <sub>2</sub> Sr,<br>Au <sub>2</sub> Sn <sub>2</sub> Sr, Be <sub>2</sub> CaGe <sub>2</sub> , AsPU, OTeU, Bi <sub>2</sub> LaLi, AuLaSb <sub>2</sub> , Ge <sub>2</sub> Pt <sub>2</sub> U, Ge <sub>2</sub> Pt <sub>2</sub> Th, AgLaSb <sub>2</sub> , CaGa <sub>4</sub> ,                                                                                                                                                                                                                                                                                                                                                                                                                                                                                                                                                                                                                                                                                                                                                                                             |
| <b>130</b> | Ca <sub>5</sub> Ge <sub>3</sub> , Ba <sub>5</sub> Si <sub>3</sub> , Ga <sub>3</sub> Y <sub>5</sub> ,                                                                                                                                                                                                                                                                                                                                                                                                                                                                                                                                                                                                                                                                                                                                                                                                                                                                                                                                                                                                                                                                                                    |
| <b>131</b> | IPdTe, F <sub>6</sub> PbSr, CaO <sub>4</sub> Pt <sub>2</sub> ,                                                                                                                                                                                                                                                                                                                                                                                                                                                                                                                                                                                                                                                                                                                                                                                                                                                                                                                                                                                                                                                                                                                                          |
| <b>133</b> | PTa <sub>3</sub> ,                                                                                                                                                                                                                                                                                                                                                                                                                                                                                                                                                                                                                                                                                                                                                                                                                                                                                                                                                                                                                                                                                                                                                                                      |
| <b>135</b> | Cs, CB <sub>2</sub> Lu, CB <sub>2</sub> Sc,                                                                                                                                                                                                                                                                                                                                                                                                                                                                                                                                                                                                                                                                                                                                                                                                                                                                                                                                                                                                                                                                                                                                                             |
| <b>136</b> | Cd <sub>4</sub> Pt <sub>2</sub> Sr, BaCd <sub>4</sub> Pt <sub>2</sub> , Al <sub>2</sub> Y <sub>3</sub> , Li <sub>2</sub> Sr <sub>3</sub> , BaHg <sub>2</sub> Tl <sub>2</sub> , BaHg <sub>2</sub> Tl <sub>2</sub> , Ag <sub>5</sub> CsTe <sub>3</sub> , Ag <sub>5</sub> CsSe <sub>3</sub> , Al <sub>2</sub> Zr <sub>3</sub> ,                                                                                                                                                                                                                                                                                                                                                                                                                                                                                                                                                                                                                                                                                                                                                                                                                                                                            |
| <b>137</b> | Ba <sub>2</sub> S <sub>6</sub> U,                                                                                                                                                                                                                                                                                                                                                                                                                                                                                                                                                                                                                                                                                                                                                                                                                                                                                                                                                                                                                                                                                                                                                                       |
| <b>139</b> | Ag <sub>2</sub> Zr, Au <sub>2</sub> Be, Au <sub>2</sub> Hf, Bi <sub>2</sub> Pd, CdHg <sub>2</sub> , Hg <sub>2</sub> Mg, CaGe <sub>2</sub> Zn <sub>2</sub> , CaP <sub>2</sub> Pd <sub>2</sub> , Au <sub>2</sub> CaSi <sub>2</sub> , Au <sub>2</sub> Zr,<br>BaGe <sub>2</sub> Mg <sub>2</sub> , Be <sub>12</sub> W, Ge <sub>2</sub> SrZn <sub>2</sub> , Be <sub>12</sub> Mo, BaCd <sub>2</sub> Ge <sub>2</sub> , Cd <sub>2</sub> Hg, Ga <sub>3</sub> Zr, Cd <sub>2</sub> Ge <sub>2</sub> Sr, Pd <sub>2</sub> Zr, PdZr <sub>2</sub> , Hf <sub>2</sub> Pd,<br>Hg <sub>2</sub> In <sub>2</sub> Sr, Pd <sub>2</sub> Ti, P <sub>2</sub> Pd <sub>2</sub> Sr, Au <sub>2</sub> Si <sub>2</sub> Sr, InPd <sub>3</sub> , In <sub>3</sub> Zr, Pt <sub>8</sub> Ti, Bi <sub>10</sub> Ca <sub>11</sub> , C <sub>2</sub> PtU <sub>2</sub> , Al <sub>2</sub> Pd <sub>5</sub> U, GeTeU,<br>LaSbSc, GeSeU, La <sub>2</sub> O <sub>4</sub> Pd, LuSbZr, O <sub>2</sub> TeU <sub>2</sub> , Pt <sub>2</sub> Si <sub>2</sub> U, SeSiU, La <sub>2</sub> Sb, PdTi <sub>2</sub> , Au <sub>2</sub> Ge <sub>2</sub> Sr, Cd <sub>2</sub> Ga <sub>2</sub> Sr,<br>MgPd <sub>3</sub> , BaBi <sub>4</sub> Br <sub>2</sub> O <sub>6</sub> , |
| <b>140</b> | Sc, Sb, BeTa <sub>2</sub> , Hf <sub>2</sub> Si, SiZr <sub>2</sub> , Pb <sub>2</sub> Pt, Sb <sub>2</sub> Ti, SiTa <sub>2</sub> , SbTi <sub>3</sub> , B <sub>2</sub> Mo <sub>5</sub> Si,<br>In <sub>5</sub> Sb <sub>3</sub> , Ga <sub>3</sub> Ta <sub>5</sub> , Bi <sub>3</sub> In <sub>5</sub> , Si <sub>3</sub> Sr <sub>5</sub> , Sn <sub>3</sub> Sr <sub>5</sub> , SiU <sub>3</sub> , BaTe <sub>5</sub> U <sub>2</sub> , PtTl <sub>2</sub> , Ge <sub>3</sub> Sr <sub>5</sub> ,                                                                                                                                                                                                                                                                                                                                                                                                                                                                                                                                                                                                                                                                                                                         |
| <b>141</b> | AgLi, Si, Sn, PTa, BW, Ga <sub>2</sub> Hf, S <sub>2</sub> Zr <sub>9</sub> , Ag <sub>8</sub> O <sub>4</sub> S <sub>2</sub> Si, PbU, Ga <sub>2</sub> Th,<br>Ge, NbP, GaZr, In <sub>2</sub> Zr, ScSn <sub>2</sub> , Al <sub>2</sub> Ti,                                                                                                                                                                                                                                                                                                                                                                                                                                                                                                                                                                                                                                                                                                                                                                                                                                                                                                                                                                    |
| <b>142</b> | Au <sub>3</sub> Zn,                                                                                                                                                                                                                                                                                                                                                                                                                                                                                                                                                                                                                                                                                                                                                                                                                                                                                                                                                                                                                                                                                                                                                                                     |

Part 4 of all the predicted TIs:

|            |                                                                                                                                                                                                                                                                                                                                                                                                                                                                                                                                                                                                                                                                                                                                                                                                                                                                                                                                                                                                                                                                                                                                                                                      |
|------------|--------------------------------------------------------------------------------------------------------------------------------------------------------------------------------------------------------------------------------------------------------------------------------------------------------------------------------------------------------------------------------------------------------------------------------------------------------------------------------------------------------------------------------------------------------------------------------------------------------------------------------------------------------------------------------------------------------------------------------------------------------------------------------------------------------------------------------------------------------------------------------------------------------------------------------------------------------------------------------------------------------------------------------------------------------------------------------------------------------------------------------------------------------------------------------------|
| <b>147</b> | Ge <sub>9</sub> Pd <sub>25</sub> , Os <sub>8</sub> U <sub>3</sub> , Au <sub>7</sub> In <sub>3</sub> ,                                                                                                                                                                                                                                                                                                                                                                                                                                                                                                                                                                                                                                                                                                                                                                                                                                                                                                                                                                                                                                                                                |
| <b>148</b> | Bi <sub>2</sub> STe <sub>2</sub> , Mo <sub>3</sub> Se <sub>4</sub> , Cl <sub>12</sub> N <sub>5</sub> Sc <sub>7</sub> , Bi <sub>14</sub> S <sub>8</sub> Te <sub>13</sub> ,                                                                                                                                                                                                                                                                                                                                                                                                                                                                                                                                                                                                                                                                                                                                                                                                                                                                                                                                                                                                            |
| <b>162</b> | Ag <sub>6</sub> O <sub>2</sub> , Cl <sub>4</sub> Mo,                                                                                                                                                                                                                                                                                                                                                                                                                                                                                                                                                                                                                                                                                                                                                                                                                                                                                                                                                                                                                                                                                                                                 |
| <b>164</b> | Be, Ag <sub>2</sub> O, CNb <sub>2</sub> , CaGe <sub>2</sub> , CTa <sub>2</sub> , BaSn <sub>2</sub> , CaSi <sub>2</sub> , CNb <sub>2</sub> S <sub>2</sub> , Bi <sub>2</sub> Mg <sub>3</sub> , CS <sub>2</sub> Ta <sub>2</sub> ,<br>Bi <sub>2</sub> Li <sub>3</sub> Y, Bi <sub>2</sub> Pb <sub>2</sub> Se <sub>5</sub> , As <sub>4</sub> GeTe <sub>7</sub> , Bi <sub>4</sub> SnTe <sub>7</sub> , As <sub>2</sub> Ge <sub>5</sub> Te <sub>8</sub> , Cl <sub>8</sub> Nb <sub>3</sub> , C <sub>6</sub> N <sub>6</sub> PtRb <sub>2</sub> S <sub>6</sub> , C <sub>6</sub> K <sub>2</sub> N <sub>6</sub> PtS <sub>6</sub> , Bi <sub>8</sub> Se <sub>7</sub> ,<br>Ge <sub>2</sub> Sr, PdTe <sub>2</sub> ,<br>PtTe <sub>2</sub> , SiTe <sub>2</sub> , GeSb <sub>4</sub> Te <sub>7</sub> , Sb <sub>2</sub> Te <sub>2</sub> , Te <sub>6</sub> Zr <sub>5</sub> , Sb <sub>2</sub> Te,                                                                                                                                                                                                                                                                                                              |
| <b>166</b> | As, CaSi <sub>2</sub> , GaP, CS <sub>2</sub> Ta <sub>2</sub> , In <sub>2</sub> Te <sub>3</sub> , GaGeTe, CY <sub>2</sub> , STi, Bi <sub>2</sub> GeTe <sub>4</sub> , Ga <sub>2</sub> Te <sub>3</sub> ,<br>Sb, S <sub>2</sub> Ta, SeTi, As <sub>2</sub> Sn <sub>2</sub> Sr, N <sub>2</sub> W, As <sub>2</sub> CaGa <sub>2</sub> , Bi <sub>2</sub> PbTe <sub>4</sub> , AgGeLi <sub>2</sub> , PtTe, Bi <sub>2</sub> Se <sub>3</sub> , Bi <sub>2</sub> SeTe <sub>2</sub> ,<br>SbTe <sub>2</sub> Tl, Bi <sub>2</sub> Te <sub>3</sub> , CaGe <sub>2</sub> , Sb <sub>2</sub> SeTe <sub>2</sub> , Sb <sub>2</sub> Te <sub>3</sub> , Li <sub>8</sub> Pb <sub>3</sub> , Sb <sub>2</sub> SnTe <sub>4</sub> , C <sub>3</sub> Al <sub>6</sub> N <sub>2</sub> , Ba <sub>2</sub> Mg <sub>17</sub> , Nb <sub>6</sub> Zn <sub>7</sub> , C <sub>5</sub> Ti <sub>8</sub> ,<br>As <sub>2</sub> Ge <sub>4</sub> Te <sub>7</sub> , Pt <sub>2</sub> Te <sub>3</sub> , Cl <sub>8</sub> Na <sub>2</sub> Ti <sub>3</sub> , Sb <sub>8</sub> Te <sub>3</sub> , Al <sub>10</sub> Ba <sub>7</sub> , Bi <sub>6</sub> PbTe <sub>10</sub> , Bi <sub>8</sub> Te <sub>9</sub> , Sb <sub>48</sub> Te <sub>9</sub> , ClLa, |
| <b>167</b> | Pd <sub>8</sub> Sb <sub>3</sub> , Mo <sub>15</sub> Se <sub>19</sub> , Mo <sub>15</sub> Se <sub>19</sub> Tl <sub>2</sub> , Cd <sub>2</sub> Mo <sub>15</sub> Se <sub>19</sub> ,                                                                                                                                                                                                                                                                                                                                                                                                                                                                                                                                                                                                                                                                                                                                                                                                                                                                                                                                                                                                        |
| <b>176</b> | Ba <sub>4</sub> Nb <sub>2</sub> O <sub>9</sub> ,                                                                                                                                                                                                                                                                                                                                                                                                                                                                                                                                                                                                                                                                                                                                                                                                                                                                                                                                                                                                                                                                                                                                     |
| <b>191</b> | B <sub>2</sub> Sr, BaSi <sub>2</sub> , CaSi <sub>2</sub> , Li <sub>2</sub> Pd, CaZn <sub>5</sub> , Li <sub>2</sub> Pt, CaPd <sub>5</sub> , BaSn <sub>5</sub> , Ti, FN <sub>3</sub> Ta <sub>2</sub> ,<br>Ti <sub>2</sub> Zr,                                                                                                                                                                                                                                                                                                                                                                                                                                                                                                                                                                                                                                                                                                                                                                                                                                                                                                                                                          |
| <b>193</b> | Ca <sub>10</sub> Ge <sub>3</sub> Pt <sub>7</sub> , Ca <sub>10</sub> Pt <sub>7</sub> Si <sub>3</sub> , Pb <sub>3</sub> TeZr <sub>5</sub> ,                                                                                                                                                                                                                                                                                                                                                                                                                                                                                                                                                                                                                                                                                                                                                                                                                                                                                                                                                                                                                                            |
| <b>194</b> | Zn, SnTi <sub>3</sub> , ScZn <sub>2</sub> , TaZn <sub>2</sub> , AgSbSr, AlN <sub>3</sub> Nb <sub>4</sub> , AuBaBi, CNb <sub>2</sub> Sn, CNb <sub>2</sub> S, Cd,<br>BaSe <sub>3</sub> Ti, Ca <sub>2</sub> IN, InPt <sub>2</sub> Y, CaGaSn, Mg <sub>17</sub> Sr <sub>2</sub> , Ca <sub>4</sub> Mg <sub>13</sub> Zn <sub>29</sub> , Pt <sub>2</sub> SnU, LuMg <sub>2</sub> , Re <sub>2</sub> Y, AlN <sub>3</sub> Ti <sub>4</sub> , Al <sub>2</sub> Hf,<br>C <sub>2</sub> AlTa <sub>3</sub> , MgPo, SiSr <sub>2</sub> ,                                                                                                                                                                                                                                                                                                                                                                                                                                                                                                                                                                                                                                                                  |
| <b>200</b> | Cl <sub>7</sub> Na, Mg <sub>2</sub> Zn <sub>11</sub> , Cd <sub>11</sub> Na <sub>2</sub> ,                                                                                                                                                                                                                                                                                                                                                                                                                                                                                                                                                                                                                                                                                                                                                                                                                                                                                                                                                                                                                                                                                            |
| <b>204</b> | BaGe <sub>12</sub> Pt <sub>4</sub> ,                                                                                                                                                                                                                                                                                                                                                                                                                                                                                                                                                                                                                                                                                                                                                                                                                                                                                                                                                                                                                                                                                                                                                 |
| <b>205</b> | AgPd <sub>3</sub> Se, N <sub>2</sub> W, PdSb <sub>2</sub> , S <sub>2</sub> Ti,                                                                                                                                                                                                                                                                                                                                                                                                                                                                                                                                                                                                                                                                                                                                                                                                                                                                                                                                                                                                                                                                                                       |
| <b>206</b> | Cd <sub>3</sub> N <sub>2</sub> , N <sub>2</sub> Zn <sub>3</sub> ,                                                                                                                                                                                                                                                                                                                                                                                                                                                                                                                                                                                                                                                                                                                                                                                                                                                                                                                                                                                                                                                                                                                    |
| <b>215</b> | Au <sub>9</sub> In <sub>4</sub> ,                                                                                                                                                                                                                                                                                                                                                                                                                                                                                                                                                                                                                                                                                                                                                                                                                                                                                                                                                                                                                                                                                                                                                    |
| <b>216</b> | AgKO, AgN, AgNaO, AgORb, AuGaLi <sub>2</sub> , HgS, InN, N <sub>2</sub> Tl, Pd <sub>17</sub> Te <sub>4</sub> , Au <sub>10</sub> Mo <sub>4</sub> Zn <sub>89</sub> ,<br>PtSnU, Pt <sub>5</sub> U, InLaPt <sub>4</sub> , NRe,                                                                                                                                                                                                                                                                                                                                                                                                                                                                                                                                                                                                                                                                                                                                                                                                                                                                                                                                                           |
| <b>221</b> | MgPd, PbSe, SnTe, AlSc, AlY, B <sub>6</sub> Ba, B <sub>6</sub> Ca, B <sub>6</sub> Sr, BeTi, Br <sub>3</sub> CsGe,<br>Br <sub>3</sub> CsPb, CsI <sub>3</sub> Sn, Sn <sub>3</sub> U, HgTi <sub>3</sub> ,                                                                                                                                                                                                                                                                                                                                                                                                                                                                                                                                                                                                                                                                                                                                                                                                                                                                                                                                                                               |
| <b>223</b> | BiNb <sub>3</sub> , HgTi <sub>3</sub> , HgZr <sub>3</sub> , Nb <sub>3</sub> Sb, SbTa <sub>3</sub> , SbTa <sub>3</sub> ,                                                                                                                                                                                                                                                                                                                                                                                                                                                                                                                                                                                                                                                                                                                                                                                                                                                                                                                                                                                                                                                              |
| <b>225</b> | HgP <sub>2</sub> Si, W, N <sub>2</sub> Pd, Li <sub>2</sub> MgSi, Y <sub>6</sub> Zn <sub>23</sub> , In <sub>7</sub> Sr <sub>11</sub> , BiY, CPd, CZr, Ca <sub>7</sub> Ge,<br>Ca <sub>3</sub> Cd <sub>8</sub> Pt <sub>4</sub> , BiLu, BiLa, SeU, NPa, LaP, GeTh, LaSb, TeU, Ga <sub>4</sub> In <sub>3</sub> Sr <sub>11</sub> , AsLa,                                                                                                                                                                                                                                                                                                                                                                                                                                                                                                                                                                                                                                                                                                                                                                                                                                                   |
| <b>227</b> | CTi <sub>2</sub> , CTi, In <sub>2</sub> Mg, Se, Hf <sub>2</sub> Pd, Hf <sub>3</sub> N <sub>2</sub> Zn <sub>3</sub> , Al <sub>18</sub> Mg <sub>3</sub> W <sub>2</sub> , Al <sub>18</sub> Mg <sub>3</sub> Mo <sub>2</sub> , C <sub>3</sub> Nb <sub>8</sub> Zn <sub>4</sub> , Al <sub>2</sub> Th,<br>CNb <sub>4</sub> Zn <sub>2</sub> ,                                                                                                                                                                                                                                                                                                                                                                                                                                                                                                                                                                                                                                                                                                                                                                                                                                                 |

Part 5 of all the predicted TIs:

|     |     |
|-----|-----|
| 229 | Be, |
|-----|-----|

Part 1 of all the predicted TCIs:

TABLE VI. All the topological crystalline insulators: Note that, due to band dispersions these materials might not be insulating in reality.

| <i>SG</i> | Topological crystalline insulators                                                                                                                                                                                                                                                                                                                                                                                                                                                                                                                                                                                                                                                                                                                                                                                                                                                                                                                                                                                                                                                                                                                                                                                                                          |
|-----------|-------------------------------------------------------------------------------------------------------------------------------------------------------------------------------------------------------------------------------------------------------------------------------------------------------------------------------------------------------------------------------------------------------------------------------------------------------------------------------------------------------------------------------------------------------------------------------------------------------------------------------------------------------------------------------------------------------------------------------------------------------------------------------------------------------------------------------------------------------------------------------------------------------------------------------------------------------------------------------------------------------------------------------------------------------------------------------------------------------------------------------------------------------------------------------------------------------------------------------------------------------------|
| <b>2</b>  | AsF <sub>6</sub> N <sub>2</sub> S <sub>3</sub> , Br <sub>3</sub> Ti, Cl <sub>18</sub> Mo <sub>2</sub> P <sub>2</sub> , Cl <sub>5</sub> Mo, CsHg, Cl <sub>9</sub> TeW, HgK, K <sub>3</sub> Nb <sub>7</sub> O <sub>19</sub> , Mo <sub>6</sub> Se <sub>8</sub> Ti, O <sub>4</sub> PbPt <sub>2</sub> , STa <sub>6</sub> , O <sub>20</sub> SrTi <sub>11</sub> ,                                                                                                                                                                                                                                                                                                                                                                                                                                                                                                                                                                                                                                                                                                                                                                                                                                                                                                  |
| <b>11</b> | Sb <sub>2</sub> Sr, Se <sub>3</sub> Ta, BaBi <sub>2</sub> Pd <sub>2</sub> , BaSb <sub>2</sub> , Bi <sub>2</sub> Pd <sub>2</sub> Sr, Li <sub>4</sub> S <sub>4</sub> Si, MoTe <sub>2</sub> , Pt <sub>6</sub> Si <sub>5</sub> , Pt <sub>3</sub> Ta, Ba <sub>3</sub> Ge <sub>2</sub> N <sub>2</sub> ,                                                                                                                                                                                                                                                                                                                                                                                                                                                                                                                                                                                                                                                                                                                                                                                                                                                                                                                                                           |
| <b>12</b> | As <sub>2</sub> Nb, As <sub>2</sub> Ta, Al <sub>14</sub> Ca <sub>13</sub> , As <sub>3</sub> Mo <sub>2</sub> , As <sub>3</sub> W <sub>2</sub> , As <sub>4</sub> Ba <sub>3</sub> Zn <sub>2</sub> , As <sub>4</sub> Zr <sub>7</sub> , Al <sub>4</sub> Na <sub>4</sub> P <sub>12</sub> Sr <sub>8</sub> , As <sub>4</sub> Hf <sub>7</sub> , AsF <sub>6</sub> NO <sub>2</sub> , Al <sub>4</sub> Cl <sub>51</sub> Zr <sub>12</sub> , BaPt <sub>2</sub> Sb <sub>2</sub> , Ba <sub>3</sub> Cd <sub>2</sub> Sb <sub>4</sub> , BiHf <sub>2</sub> , BiSe, BiBr, Bi <sub>2</sub> ITe, C <sub>5</sub> Nb <sub>6</sub> , ClZr, Br <sub>5</sub> W, Cl <sub>8</sub> NSc <sub>5</sub> , CdK <sub>6</sub> Pb <sub>8</sub> , Hf <sub>2</sub> Te, Hf <sub>7</sub> P <sub>4</sub> , In <sub>4</sub> Sr, LiMoO <sub>2</sub> , NbP <sub>2</sub> , NbSb <sub>2</sub> , Nb <sub>2</sub> Se, Nb <sub>7</sub> P <sub>4</sub> , O <sub>5</sub> Ti <sub>5</sub> , P <sub>4</sub> Zr <sub>7</sub> , Pt <sub>2</sub> Te <sub>3</sub> , Sb <sub>2</sub> Ta, Se <sub>4</sub> Ti <sub>3</sub> , Ta <sub>2</sub> Te <sub>3</sub> , Te <sub>4</sub> Ti <sub>3</sub> , Se <sub>3</sub> Ti <sub>8</sub> , LaSi <sub>5</sub> , Ge <sub>2</sub> Re, I <sub>3</sub> La <sub>5</sub> Si <sub>5</sub> , |
| <b>13</b> | FMo <sub>2</sub> O <sub>7</sub> Y,                                                                                                                                                                                                                                                                                                                                                                                                                                                                                                                                                                                                                                                                                                                                                                                                                                                                                                                                                                                                                                                                                                                                                                                                                          |
| <b>14</b> | AsSeY, AsSY, LaSbSe, AsLuSe, K <sub>2</sub> O <sub>7</sub> W <sub>2</sub> , O <sub>7</sub> Si <sub>2</sub> Y <sub>2</sub> , O <sub>7</sub> Rb <sub>2</sub> W <sub>2</sub> , O <sub>7</sub> P <sub>2</sub> Sn <sub>2</sub> ,                                                                                                                                                                                                                                                                                                                                                                                                                                                                                                                                                                                                                                                                                                                                                                                                                                                                                                                                                                                                                                 |
| <b>15</b> | P <sub>2</sub> Pt <sub>5</sub> , Sb <sub>2</sub> Te <sub>3</sub> , Na <sub>6</sub> Sb <sub>4</sub> Tl, Pb <sub>9</sub> Pd <sub>13</sub> ,                                                                                                                                                                                                                                                                                                                                                                                                                                                                                                                                                                                                                                                                                                                                                                                                                                                                                                                                                                                                                                                                                                                   |
| <b>47</b> | OTa <sub>4</sub> , MoO <sub>36</sub> W <sub>11</sub> ,                                                                                                                                                                                                                                                                                                                                                                                                                                                                                                                                                                                                                                                                                                                                                                                                                                                                                                                                                                                                                                                                                                                                                                                                      |
| <b>51</b> | CdMg, BiPd <sub>3</sub> , MoPt, PdTi, GaPt <sub>2</sub> , BLi, C <sub>3</sub> AlY <sub>3</sub> , O <sub>5</sub> U <sub>2</sub> , Ca <sub>5</sub> P <sub>6</sub> Pd <sub>6</sub> ,                                                                                                                                                                                                                                                                                                                                                                                                                                                                                                                                                                                                                                                                                                                                                                                                                                                                                                                                                                                                                                                                           |
| <b>55</b> | Ca <sub>5</sub> Ga <sub>2</sub> Sb <sub>6</sub> , Cd <sub>7</sub> Th <sub>6</sub> , B <sub>6</sub> ReY <sub>2</sub> , B <sub>6</sub> ReSc <sub>2</sub> , Ga <sub>2</sub> Mg, Bi <sub>8</sub> Ca <sub>3</sub> Pd <sub>4</sub> , C <sub>5</sub> Y <sub>4</sub> ,                                                                                                                                                                                                                                                                                                                                                                                                                                                                                                                                                                                                                                                                                                                                                                                                                                                                                                                                                                                              |
| <b>57</b> | Ca <sub>3</sub> Ga <sub>2</sub> Pd <sub>2</sub> , AlLu, Ca <sub>3</sub> Ga <sub>2</sub> Pt <sub>2</sub> ,                                                                                                                                                                                                                                                                                                                                                                                                                                                                                                                                                                                                                                                                                                                                                                                                                                                                                                                                                                                                                                                                                                                                                   |
| <b>58</b> | Bi <sub>3</sub> RbS <sub>5</sub> , STi <sub>2</sub> , P <sub>9</sub> Zr <sub>14</sub> , AsTa <sub>2</sub> ,                                                                                                                                                                                                                                                                                                                                                                                                                                                                                                                                                                                                                                                                                                                                                                                                                                                                                                                                                                                                                                                                                                                                                 |
| <b>59</b> | BrNTi, Ba <sub>6</sub> Ge <sub>5</sub> N <sub>2</sub> , INTi, PdSiY,                                                                                                                                                                                                                                                                                                                                                                                                                                                                                                                                                                                                                                                                                                                                                                                                                                                                                                                                                                                                                                                                                                                                                                                        |
| <b>61</b> | O <sub>2</sub> U,                                                                                                                                                                                                                                                                                                                                                                                                                                                                                                                                                                                                                                                                                                                                                                                                                                                                                                                                                                                                                                                                                                                                                                                                                                           |
| <b>62</b> | BiI <sub>3</sub> , Ga <sub>5</sub> Y <sub>3</sub> , PSc <sub>3</sub> , PdSn, PdSi, Pd <sub>2</sub> Sn, PtSc <sub>2</sub> , GePd, GePt, Sb <sub>3</sub> Sc <sub>5</sub> , CaTe, Ge <sub>2</sub> Pt <sub>3</sub> , Ca <sub>3</sub> Hg, HgSr <sub>3</sub> , In <sub>5</sub> Y <sub>3</sub> , Ca <sub>7</sub> Ge <sub>6</sub> , MgSi <sub>2</sub> Sr, MoPt <sub>3</sub> Si <sub>4</sub> , SiU, LaSbTe, Te <sub>5</sub> U, Ga <sub>5</sub> Lu <sub>3</sub> , In <sub>4</sub> La <sub>2</sub> Pd <sub>3</sub> , Lu <sub>5</sub> Sb <sub>3</sub> , PtY <sub>2</sub> ,                                                                                                                                                                                                                                                                                                                                                                                                                                                                                                                                                                                                                                                                                              |
| <b>63</b> | AlGeSc, AlSiY, AsIn, AuY, BaGe, BaSi, BaSn, BaSi <sub>6</sub> , Bi <sub>2</sub> Ca, Au <sub>3</sub> Mg, CaGe, CaIn <sub>2</sub> Pd, CaIn <sub>2</sub> Pt, Ba <sub>3</sub> Pb <sub>5</sub> , CaSn, CaPdSn <sub>2</sub> , Ca <sub>3</sub> Zn, Ge <sub>2</sub> Pt <sub>3</sub> , HgTe, In <sub>2</sub> PdSr, Cd <sub>2</sub> FSb <sub>5</sub> Sr <sub>5</sub> , PdSrTl <sub>2</sub> , PbSr, SnSr, Pd <sub>3</sub> Te <sub>2</sub> , Si <sub>2</sub> Ti, Si <sub>6</sub> Sr, Ba <sub>5</sub> Cd <sub>2</sub> FSb <sub>5</sub> , AlGeLu, AlLuSi, N <sub>3</sub> TaTh, La <sub>2</sub> Li <sub>2</sub> Si <sub>3</sub> , La <sub>2</sub> PbZn <sub>5</sub> , Ge <sub>3</sub> La <sub>2</sub> Li <sub>2</sub> , La <sub>3</sub> Tl <sub>5</sub> , Al <sub>2</sub> GeLa <sub>2</sub> , CsScSe <sub>5</sub> U, Al <sub>4</sub> Mg <sub>19</sub> Zn <sub>15</sub> , BaPb, Ca <sub>2</sub> InN, In <sub>5</sub> Y <sub>3</sub> ,                                                                                                                                                                                                                                                                                                                                       |
| <b>64</b> | BiSn, Ba <sub>2</sub> Ge <sub>4</sub> Pd <sub>5</sub> , Li, Ca <sub>5</sub> Ga <sub>2</sub> N <sub>4</sub> , LaS,                                                                                                                                                                                                                                                                                                                                                                                                                                                                                                                                                                                                                                                                                                                                                                                                                                                                                                                                                                                                                                                                                                                                           |
| <b>65</b> | INaO <sub>3</sub> , Au <sub>7</sub> Rb <sub>3</sub> , Ba <sub>3</sub> Nb <sub>16</sub> O <sub>23</sub> , Ba <sub>4</sub> Nb <sub>14</sub> O <sub>23</sub> , La <sub>2</sub> Sn <sub>5</sub> , In <sub>9</sub> La <sub>11</sub> Pd <sub>4</sub> , OTi <sub>2</sub> Zr, Ga <sub>13</sub> Nb <sub>5</sub> ,                                                                                                                                                                                                                                                                                                                                                                                                                                                                                                                                                                                                                                                                                                                                                                                                                                                                                                                                                    |
| <b>69</b> | Ag <sub>2</sub> Ca <sub>4</sub> Si <sub>6</sub> , Bi <sub>2</sub> CaNb <sub>2</sub> O <sub>9</sub> , Ge <sub>6</sub> Li <sub>2</sub> Sr <sub>4</sub> , K <sub>2</sub> Pd <sub>3</sub> S <sub>6</sub> U, Pd <sub>3</sub> Rb <sub>2</sub> Se <sub>6</sub> U, Cs <sub>2</sub> Pd <sub>3</sub> Se <sub>6</sub> U,                                                                                                                                                                                                                                                                                                                                                                                                                                                                                                                                                                                                                                                                                                                                                                                                                                                                                                                                               |
| <b>71</b> | Al <sub>2</sub> Ca <sub>3</sub> Ge <sub>2</sub> , Ca <sub>2</sub> CdPd <sub>2</sub> , Ca <sub>2</sub> MgPd <sub>2</sub> , Ca <sub>2</sub> MgPt <sub>2</sub> , HgO <sub>6</sub> Pt <sub>3</sub> , Ge <sub>2</sub> PtY, Li <sub>4</sub> Sb <sub>4</sub> Sr <sub>3</sub> , Al <sub>4</sub> OSi <sub>6</sub> Sr <sub>10</sub> , B <sub>4</sub> Ti <sub>3</sub> , Ba <sub>3</sub> Bi <sub>4</sub> Li <sub>4</sub> , Ba <sub>3</sub> Li <sub>4</sub> Sb <sub>4</sub> , Ba <sub>3</sub> CdHg <sub>10</sub> , Sn <sub>5</sub> Ti <sub>6</sub> ,                                                                                                                                                                                                                                                                                                                                                                                                                                                                                                                                                                                                                                                                                                                     |
| <b>72</b> | Pt <sub>3</sub> Sb <sub>2</sub> , Mg <sub>5</sub> Tl <sub>2</sub> , Pt <sub>5</sub> Ti <sub>3</sub> , Ge <sub>5</sub> Ti <sub>6</sub> ,                                                                                                                                                                                                                                                                                                                                                                                                                                                                                                                                                                                                                                                                                                                                                                                                                                                                                                                                                                                                                                                                                                                     |

Part 2 of all the predicted TCIs:

|            |                                                                                                                                                                                                                                                                                                                                                                                                                                                                                                                                                                                                                                                                                                                                                                                                                                                                                                                                                                                                                                                                                                                                                                                                                                                                                                                                                                                                                                                                                                                                                                                                                                                                                                                                                                     |
|------------|---------------------------------------------------------------------------------------------------------------------------------------------------------------------------------------------------------------------------------------------------------------------------------------------------------------------------------------------------------------------------------------------------------------------------------------------------------------------------------------------------------------------------------------------------------------------------------------------------------------------------------------------------------------------------------------------------------------------------------------------------------------------------------------------------------------------------------------------------------------------------------------------------------------------------------------------------------------------------------------------------------------------------------------------------------------------------------------------------------------------------------------------------------------------------------------------------------------------------------------------------------------------------------------------------------------------------------------------------------------------------------------------------------------------------------------------------------------------------------------------------------------------------------------------------------------------------------------------------------------------------------------------------------------------------------------------------------------------------------------------------------------------|
| <b>73</b>  | Alli <sub>3</sub> P <sub>2</sub> ,                                                                                                                                                                                                                                                                                                                                                                                                                                                                                                                                                                                                                                                                                                                                                                                                                                                                                                                                                                                                                                                                                                                                                                                                                                                                                                                                                                                                                                                                                                                                                                                                                                                                                                                                  |
| <b>74</b>  | BaCd <sub>2</sub> , CaCd <sub>2</sub> , Hg <sub>2</sub> Sr, BaZn <sub>2</sub> , CaZn <sub>2</sub> , BaHg <sub>2</sub> , SrZn <sub>2</sub> , Cd <sub>2</sub> Sr, BaGe <sub>5</sub> ,                                                                                                                                                                                                                                                                                                                                                                                                                                                                                                                                                                                                                                                                                                                                                                                                                                                                                                                                                                                                                                                                                                                                                                                                                                                                                                                                                                                                                                                                                                                                                                                 |
| <b>84</b>  | P <sub>2</sub> S <sub>6</sub> U,                                                                                                                                                                                                                                                                                                                                                                                                                                                                                                                                                                                                                                                                                                                                                                                                                                                                                                                                                                                                                                                                                                                                                                                                                                                                                                                                                                                                                                                                                                                                                                                                                                                                                                                                    |
| <b>85</b>  | P <sub>2</sub> U,                                                                                                                                                                                                                                                                                                                                                                                                                                                                                                                                                                                                                                                                                                                                                                                                                                                                                                                                                                                                                                                                                                                                                                                                                                                                                                                                                                                                                                                                                                                                                                                                                                                                                                                                                   |
| <b>86</b>  | SiTa <sub>3</sub> ,                                                                                                                                                                                                                                                                                                                                                                                                                                                                                                                                                                                                                                                                                                                                                                                                                                                                                                                                                                                                                                                                                                                                                                                                                                                                                                                                                                                                                                                                                                                                                                                                                                                                                                                                                 |
| <b>87</b>  | Au <sub>4</sub> Ti,                                                                                                                                                                                                                                                                                                                                                                                                                                                                                                                                                                                                                                                                                                                                                                                                                                                                                                                                                                                                                                                                                                                                                                                                                                                                                                                                                                                                                                                                                                                                                                                                                                                                                                                                                 |
| <b>88</b>  | O <sub>4</sub> PbPd <sub>2</sub> , P <sub>4</sub> S <sub>12</sub> U,                                                                                                                                                                                                                                                                                                                                                                                                                                                                                                                                                                                                                                                                                                                                                                                                                                                                                                                                                                                                                                                                                                                                                                                                                                                                                                                                                                                                                                                                                                                                                                                                                                                                                                |
| <b>123</b> | AsNa, CdHg <sub>2</sub> Ti, Pd <sub>3</sub> Sn, Pb <sub>3</sub> Sr, CPd <sub>3</sub> Sn, As <sub>3</sub> RbZn <sub>4</sub> , Pt <sub>5</sub> SiSn, As <sub>3</sub> CsZn <sub>4</sub> , BaOSb <sub>2</sub> Ti <sub>2</sub> , AgSbTe <sub>2</sub> ,                                                                                                                                                                                                                                                                                                                                                                                                                                                                                                                                                                                                                                                                                                                                                                                                                                                                                                                                                                                                                                                                                                                                                                                                                                                                                                                                                                                                                                                                                                                   |
| <b>127</b> | Pb <sub>3</sub> Sr <sub>2</sub> , Li <sub>2</sub> Sn <sub>5</sub> , B <sub>4</sub> Ca, Si <sub>2</sub> U <sub>3</sub> ,                                                                                                                                                                                                                                                                                                                                                                                                                                                                                                                                                                                                                                                                                                                                                                                                                                                                                                                                                                                                                                                                                                                                                                                                                                                                                                                                                                                                                                                                                                                                                                                                                                             |
| <b>129</b> | GeSZr, GeNbSb, SnTeZr, OSiZr, SeSiZr, SSiZr, SiTeZr, HfSSi, GeSeZr, HfSeSi, GeHfSe, GeHfS, GeHfTe, AsGeNb, BaPd <sub>2</sub> Sb <sub>2</sub> , Pd <sub>2</sub> Sb <sub>2</sub> Sr, Bi <sub>2</sub> Pd <sub>2</sub> Sr, Au <sub>2</sub> Ga <sub>2</sub> Sr, BaMg <sub>2</sub> Pb <sub>2</sub> , BaMg <sub>2</sub> Sn <sub>2</sub> , CsF <sub>4</sub> Ti, BiO <sub>3</sub> Te, In <sub>9</sub> Li <sub>2</sub> Y <sub>5</sub> , Al <sub>2</sub> Au <sub>2</sub> Th, As <sub>2</sub> U, As <sub>2</sub> PdU, GeSU, P <sub>2</sub> U, SSiU, SnTeU, Sb <sub>2</sub> U, Pt <sub>2</sub> Si <sub>2</sub> Th, LaSbTe, PdSb <sub>2</sub> U, HfSiTe,                                                                                                                                                                                                                                                                                                                                                                                                                                                                                                                                                                                                                                                                                                                                                                                                                                                                                                                                                                                                                                                                                                                          |
| <b>136</b> | Al <sub>2</sub> Hf <sub>3</sub> , Al <sub>2</sub> Lu <sub>3</sub> ,                                                                                                                                                                                                                                                                                                                                                                                                                                                                                                                                                                                                                                                                                                                                                                                                                                                                                                                                                                                                                                                                                                                                                                                                                                                                                                                                                                                                                                                                                                                                                                                                                                                                                                 |
| <b>137</b> | Ba <sub>2</sub> LiN,                                                                                                                                                                                                                                                                                                                                                                                                                                                                                                                                                                                                                                                                                                                                                                                                                                                                                                                                                                                                                                                                                                                                                                                                                                                                                                                                                                                                                                                                                                                                                                                                                                                                                                                                                |
| <b>139</b> | As <sub>2</sub> Pd <sub>2</sub> Sr, As <sub>2</sub> CaPd <sub>2</sub> , BePd <sub>2</sub> , Ba <sub>2</sub> Zn, CaGe <sub>2</sub> Pd <sub>2</sub> , Au <sub>2</sub> CaGe <sub>2</sub> , AsTiZr, Ba <sub>2</sub> Cd, BaPd <sub>2</sub> Sb <sub>2</sub> , Ba <sub>2</sub> Hg, AsCa <sub>2</sub> , CaPd <sub>2</sub> Si <sub>2</sub> , Al <sub>3</sub> Hf, Pd <sub>2</sub> Sb <sub>2</sub> Sr, ZnZr <sub>2</sub> , Ag <sub>2</sub> BaSn <sub>2</sub> , Hf <sub>2</sub> Hg, Br <sub>2</sub> Ca <sub>3</sub> Si, BiSr <sub>2</sub> , AsBa <sub>2</sub> , SbZr <sub>2</sub> , Pd <sub>2</sub> Si <sub>2</sub> Sr, Ga <sub>4</sub> Ti <sub>2</sub> Zr, SbYZr, CaIn, MoO <sub>4</sub> Sr <sub>2</sub> , Ba <sub>2</sub> Bi, SbSr <sub>2</sub> , Bi <sub>2</sub> F <sub>2</sub> OSr <sub>2</sub> Ti <sub>2</sub> , As <sub>2</sub> F <sub>2</sub> OSr <sub>2</sub> Ti <sub>2</sub> , CaSi <sub>3</sub> , Si <sub>3</sub> Y, Ba <sub>2</sub> Sb, F <sub>2</sub> OSb <sub>2</sub> Sr <sub>2</sub> Ti <sub>2</sub> , Ca <sub>2</sub> Pd <sub>3</sub> Sb <sub>4</sub> , Al <sub>2</sub> Ge <sub>8</sub> Sc <sub>11</sub> , Ga <sub>10</sub> Hf <sub>11</sub> , Au <sub>2</sub> Si <sub>2</sub> U, Ge <sub>2</sub> Pd <sub>2</sub> Th, Ge <sub>2</sub> Pt <sub>2</sub> Th, Ge <sub>2</sub> Pt <sub>2</sub> U, ThZn <sub>4</sub> , GeLaSc, Pd <sub>2</sub> Si <sub>2</sub> Th, LaScSi, Pt <sub>2</sub> Th, PTeU, Pt <sub>2</sub> Si <sub>2</sub> Th, O <sub>4</sub> Te <sub>3</sub> U <sub>4</sub> , Ge <sub>4</sub> In <sub>6</sub> La <sub>11</sub> , Ti <sub>2</sub> Zn, Hf <sub>2</sub> Zn, CdHf <sub>2</sub> , Ag <sub>2</sub> BaGe <sub>2</sub> , BaSi <sub>2</sub> , Ca <sub>2</sub> Sb, K <sub>2</sub> Mg <sub>5</sub> Sn <sub>3</sub> , Mo <sub>3</sub> Sb <sub>7</sub> , |
| <b>140</b> | Bi, Mg <sub>2</sub> Pt, MoO <sub>3</sub> Sr, GePt <sub>3</sub> , GeNb <sub>3</sub> , Ca <sub>5</sub> Hg <sub>3</sub> , Cd <sub>3</sub> Sr <sub>5</sub> , Ga <sub>2</sub> Sc <sub>3</sub> , Ga <sub>2</sub> Y <sub>3</sub> , Ga <sub>2</sub> Lu <sub>3</sub> , Lu <sub>7</sub> Sb <sub>3</sub> ,                                                                                                                                                                                                                                                                                                                                                                                                                                                                                                                                                                                                                                                                                                                                                                                                                                                                                                                                                                                                                                                                                                                                                                                                                                                                                                                                                                                                                                                                     |
| <b>141</b> | Al <sub>2</sub> Mg,                                                                                                                                                                                                                                                                                                                                                                                                                                                                                                                                                                                                                                                                                                                                                                                                                                                                                                                                                                                                                                                                                                                                                                                                                                                                                                                                                                                                                                                                                                                                                                                                                                                                                                                                                 |
| <b>147</b> | Bi <sub>2</sub> Pt,                                                                                                                                                                                                                                                                                                                                                                                                                                                                                                                                                                                                                                                                                                                                                                                                                                                                                                                                                                                                                                                                                                                                                                                                                                                                                                                                                                                                                                                                                                                                                                                                                                                                                                                                                 |
| <b>148</b> | Mo <sub>6</sub> S <sub>8</sub> , Mo <sub>18</sub> S <sub>22</sub> Tl <sub>4</sub> , Mo <sub>3</sub> S <sub>4</sub> ,                                                                                                                                                                                                                                                                                                                                                                                                                                                                                                                                                                                                                                                                                                                                                                                                                                                                                                                                                                                                                                                                                                                                                                                                                                                                                                                                                                                                                                                                                                                                                                                                                                                |
| <b>164</b> | BaSi <sub>2</sub> , CW <sub>2</sub> , B <sub>2</sub> O, Bi <sub>2</sub> Pb <sub>2</sub> Te <sub>5</sub> , Bi <sub>2</sub> Se <sub>2</sub> , BiTe, Bi <sub>3</sub> STe <sub>2</sub> , CdO <sub>4</sub> S, Te <sub>2</sub> Zr, HgPt <sub>2</sub> Se <sub>3</sub> , AllLaSi <sub>2</sub> ,                                                                                                                                                                                                                                                                                                                                                                                                                                                                                                                                                                                                                                                                                                                                                                                                                                                                                                                                                                                                                                                                                                                                                                                                                                                                                                                                                                                                                                                                             |
| <b>166</b> | Bi, B <sub>2</sub> Mo, ClZr, Hg, CNb <sub>2</sub> S <sub>2</sub> , BrZr, P, Ba <sub>3</sub> O <sub>9</sub> Sc <sub>4</sub> , B <sub>4</sub> Mo <sub>2</sub> , AsNaTe <sub>2</sub> Zr <sub>2</sub> , Ag <sub>4</sub> Sb <sub>2</sub> Sr, TeZr <sub>3</sub> , Ga, As <sub>3</sub> Cd <sub>4</sub> Na, As <sub>3</sub> Cd <sub>4</sub> K, Pd <sub>3</sub> S <sub>2</sub> Tl <sub>2</sub> , Bi <sub>4</sub> Se <sub>3</sub> , As <sub>3</sub> Cd <sub>4</sub> Rb, Pt <sub>3</sub> Te <sub>4</sub> , Bi <sub>8</sub> Se <sub>9</sub> , BrLa, C <sub>6</sub> Al <sub>4</sub> Hf <sub>3</sub> ,                                                                                                                                                                                                                                                                                                                                                                                                                                                                                                                                                                                                                                                                                                                                                                                                                                                                                                                                                                                                                                                                                                                                                                            |



Part 3 of all the predicted TCIs:

|     |                                                                                                                                                                                                                                                                                                                                                                                                                                                                                   |
|-----|-----------------------------------------------------------------------------------------------------------------------------------------------------------------------------------------------------------------------------------------------------------------------------------------------------------------------------------------------------------------------------------------------------------------------------------------------------------------------------------|
| 176 | Mo <sub>9</sub> Se <sub>11</sub> , Mo <sub>15</sub> S <sub>19</sub> ,                                                                                                                                                                                                                                                                                                                                                                                                             |
| 187 | CHf, NbSe <sub>2</sub> , NY, InNbS <sub>2</sub> , PPTy, InNbSe <sub>2</sub> , Br <sub>2</sub> Ca <sub>3</sub> Si, LuPPt,                                                                                                                                                                                                                                                                                                                                                          |
| 189 | AgGeSc, CaPbPd, CaCdPb, AgPbY, AgAsCa, GaMgY, MgTiY, AlMgY, GePdTi, CaCdGe, CaCdSn, GeLiY, InMgY, BLiPt <sub>3</sub> , Rb <sub>15</sub> Tl <sub>27</sub> , CsRb <sub>14</sub> Tl <sub>27</sub> , InLaPt, AsLuPd, AuCdLa, Ge <sub>3</sub> La <sub>2</sub> Zn <sub>6</sub> , LaMgTl, AgCaP, AgMgY, AuGaMg, AgSiY, LiSiY, OTi, Pt <sub>5</sub> Th <sub>3</sub> , PtSnU, Pd <sub>5</sub> Th <sub>3</sub> , Se <sub>2</sub> U, GaLaMg, AgLuSi, AgLaMg, O <sub>8</sub> U <sub>3</sub> , |
| 191 | B <sub>2</sub> Mg, B <sub>2</sub> Ti, B <sub>2</sub> Ca, B <sub>2</sub> Zr, C <sub>2</sub> Ca, Ga <sub>2</sub> Sr, Si, Pd <sub>5</sub> Sr, Be <sub>12</sub> Ti,                                                                                                                                                                                                                                                                                                                   |
| 193 | Pb <sub>3</sub> SZr <sub>5</sub> , NbSb <sub>5</sub> U <sub>3</sub> ,                                                                                                                                                                                                                                                                                                                                                                                                             |
| 194 | SnTi <sub>2</sub> , AlLi, AsHgK, B <sub>2</sub> W, C, CGeNb <sub>2</sub> , CCdTi <sub>2</sub> , CdNa <sub>2</sub> Sn, HgKSb, BaGaGe, Cs <sub>3</sub> I <sub>9</sub> Mo <sub>2</sub> , Mg <sub>4</sub> Sr, ILa, I <sub>2</sub> Th, Hf <sub>9</sub> Re <sub>4</sub> Se, Hf <sub>9</sub> Re <sub>4</sub> S, AsPtY,                                                                                                                                                                   |
| 204 | Al <sub>12</sub> Mo, Al <sub>12</sub> W, NPd <sub>3</sub> ,                                                                                                                                                                                                                                                                                                                                                                                                                       |
| 221 | NY, NTi <sub>3</sub> Tl, PbPt <sub>3</sub> , Pt <sub>3</sub> Sn, Pt <sub>3</sub> Zn, AgGa, AgIn, AgLi, AlAu, CPbPd <sub>3</sub> , CPt <sub>3</sub> Sn, C <sub>3</sub> Nb <sub>4</sub> , CaPd, Ca <sub>3</sub> GeO, Ca <sub>3</sub> OPb, HfPd <sub>3</sub> , HgPt <sub>3</sub> , CTh, LaN, N <sub>3</sub> TaTh, SiU <sub>3</sub> , Ca <sub>3</sub> OSn, OSnSr <sub>3</sub> , OPbSr <sub>3</sub> , Ba <sub>3</sub> OPb,                                                             |
| 225 | PbPo, SSn, SbSc, SeSn, SnTe, Ag <sub>2</sub> MgZn, AlAu <sub>2</sub> Sc, Al <sub>2</sub> O, AsSc, Au <sub>2</sub> InSc, Au <sub>2</sub> InY, B <sub>12</sub> Hf, Au <sub>2</sub> Cl <sub>6</sub> Cs <sub>2</sub> , Ba, Bi <sub>3</sub> , BiSc, CPt, Ca, Au <sub>2</sub> InLu, B <sub>12</sub> Th, O <sub>2</sub> U, LuSb, CW, Al <sub>16</sub> Pt <sub>7</sub> Zr <sub>6</sub> ,                                                                                                  |
| 227 | Al <sub>2</sub> Sr, Al <sub>2</sub> Ba, S <sub>2</sub> Ti, Pd <sub>13</sub> Te <sub>3</sub> , Mo <sub>2</sub> O <sub>7</sub> Y <sub>2</sub> , Ba <sub>21</sub> O <sub>5</sub> Si <sub>2</sub> , La <sub>2</sub> O <sub>7</sub> Zr <sub>2</sub> , Cd <sub>2</sub> O <sub>7</sub> Re <sub>2</sub> , HfZn <sub>2</sub> , NPd <sub>2</sub> Zr <sub>4</sub> ,                                                                                                                          |

Part 1 of all the predicted **Case 3**-TSMs:

TABLE VII. All the topological (semi-)metals from **Case 3**.

| SG | Topological (semi-)metals                                                                                                                                                                                                                                                                                                                                                                                                                                                                                                                                                                                                                                                                                                                                                                                                                                                                                                                                                                                                                                                                                                                                                                                                                                                                                                                                                                                                                                                                                                                                    |
|----|--------------------------------------------------------------------------------------------------------------------------------------------------------------------------------------------------------------------------------------------------------------------------------------------------------------------------------------------------------------------------------------------------------------------------------------------------------------------------------------------------------------------------------------------------------------------------------------------------------------------------------------------------------------------------------------------------------------------------------------------------------------------------------------------------------------------------------------------------------------------------------------------------------------------------------------------------------------------------------------------------------------------------------------------------------------------------------------------------------------------------------------------------------------------------------------------------------------------------------------------------------------------------------------------------------------------------------------------------------------------------------------------------------------------------------------------------------------------------------------------------------------------------------------------------------------|
| 2  | AgF <sub>11</sub> NaZr <sub>2</sub> , AgBi <sub>2</sub> F <sub>12</sub> , AgF <sub>6</sub> Sn, AgF <sub>12</sub> Sb <sub>2</sub> , AgF <sub>6</sub> Ti, AgF <sub>12</sub> Ta <sub>2</sub> , As <sub>10</sub> Cs <sub>13</sub> In <sub>6</sub> Nb <sub>2</sub> , Ba <sub>14</sub> CaN <sub>6</sub> Na <sub>17</sub> , Cl <sub>6</sub> ISe <sub>6</sub> W, Cl <sub>8</sub> NW <sub>2</sub> , InMo <sub>6</sub> S <sub>8</sub> , I <sub>10</sub> Ta <sub>7</sub> Te <sub>24</sub> , Cl <sub>12</sub> ReTe <sub>2</sub> , Se <sub>2</sub> Ta,                                                                                                                                                                                                                                                                                                                                                                                                                                                                                                                                                                                                                                                                                                                                                                                                                                                                                                                                                                                                                    |
| 4  | Ge <sub>2</sub> Pt <sub>2</sub> Y,                                                                                                                                                                                                                                                                                                                                                                                                                                                                                                                                                                                                                                                                                                                                                                                                                                                                                                                                                                                                                                                                                                                                                                                                                                                                                                                                                                                                                                                                                                                           |
| 5  | F <sub>11</sub> I <sub>2</sub> Sb <sub>2</sub> , NbS <sub>2</sub> , I <sub>47</sub> W <sub>15</sub> ,                                                                                                                                                                                                                                                                                                                                                                                                                                                                                                                                                                                                                                                                                                                                                                                                                                                                                                                                                                                                                                                                                                                                                                                                                                                                                                                                                                                                                                                        |
| 6  | Mo <sub>8</sub> P <sub>5</sub> ,                                                                                                                                                                                                                                                                                                                                                                                                                                                                                                                                                                                                                                                                                                                                                                                                                                                                                                                                                                                                                                                                                                                                                                                                                                                                                                                                                                                                                                                                                                                             |
| 10 | AuCd,                                                                                                                                                                                                                                                                                                                                                                                                                                                                                                                                                                                                                                                                                                                                                                                                                                                                                                                                                                                                                                                                                                                                                                                                                                                                                                                                                                                                                                                                                                                                                        |
| 11 | S <sub>3</sub> Ta, BeLi, CBrHgNS, Bi <sub>9</sub> I <sub>2</sub> , Br <sub>9</sub> TeW, Li <sub>7</sub> Sn <sub>3</sub> , Ge <sub>6</sub> Pt <sub>4</sub> Y <sub>3</sub> , Mo <sub>2</sub> S <sub>2</sub> Sb, NbS <sub>3</sub> , Pd <sub>3</sub> Ta <sub>3</sub> Te <sub>14</sub> , N <sub>2</sub> Re, CBCl <sub>3</sub> La <sub>3</sub> ,                                                                                                                                                                                                                                                                                                                                                                                                                                                                                                                                                                                                                                                                                                                                                                                                                                                                                                                                                                                                                                                                                                                                                                                                                   |
| 12 | AlMg <sub>4</sub> Si <sub>6</sub> , AgMo <sub>6</sub> Te <sub>6</sub> , Al <sub>3</sub> Si <sub>2</sub> Y <sub>2</sub> , AgBi <sub>6</sub> S <sub>9</sub> , Al <sub>4</sub> Li <sub>9</sub> , Ag <sub>3</sub> F <sub>14</sub> Hf <sub>2</sub> , As <sub>4</sub> Na <sub>5</sub> , Bi <sub>8</sub> I <sub>3</sub> Pt <sub>5</sub> , Cl <sub>5</sub> Y <sub>4</sub> , CCl <sub>8</sub> Sc <sub>5</sub> , C <sub>2</sub> Cl <sub>10</sub> Sc <sub>7</sub> , C <sub>2</sub> I <sub>7</sub> Y <sub>6</sub> , Cl <sub>10</sub> Sc <sub>7</sub> , Ba <sub>14</sub> CaN <sub>6</sub> Na <sub>21</sub> , Cl <sub>8</sub> Sc <sub>5</sub> , Cl <sub>6</sub> O <sub>2</sub> TiW <sub>2</sub> , CsSe <sub>8</sub> Ti <sub>5</sub> , CsTe <sub>8</sub> Ti <sub>5</sub> , Ga <sub>3</sub> Pd <sub>7</sub> , Ga <sub>5</sub> Pd <sub>13</sub> , InPt, KSe <sub>8</sub> Ti <sub>5</sub> , K <sub>5</sub> Sb <sub>4</sub> , In <sub>9</sub> Pt <sub>13</sub> , Mo <sub>2</sub> O <sub>12</sub> Y <sub>5</sub> , NaSe <sub>8</sub> Ti <sub>5</sub> , NbTe <sub>2</sub> , Nb <sub>5</sub> PbSe <sub>8</sub> , Nb <sub>5</sub> Se <sub>8</sub> Sr, Nb <sub>5</sub> Se <sub>8</sub> Sn, Na <sub>3</sub> O <sub>13</sub> Ti <sub>6</sub> , O <sub>3</sub> Sr <sub>2</sub> Tl, RbSe <sub>8</sub> Ti <sub>5</sub> , S <sub>7</sub> Y <sub>5</sub> , TaTe <sub>2</sub> , Se <sub>8</sub> Ti <sub>5</sub> Tl, P <sub>4</sub> Re <sub>3</sub> , In <sub>21</sub> Pd <sub>10</sub> Th <sub>4</sub> , O <sub>64</sub> P <sub>8</sub> Rb <sub>2</sub> W <sub>16</sub> , N <sub>2</sub> Re, |
| 13 | F <sub>6</sub> ISbSe <sub>6</sub> ,                                                                                                                                                                                                                                                                                                                                                                                                                                                                                                                                                                                                                                                                                                                                                                                                                                                                                                                                                                                                                                                                                                                                                                                                                                                                                                                                                                                                                                                                                                                          |
| 14 | MgP <sub>4</sub> , F <sub>4</sub> Xe, CdP <sub>4</sub> , InS, NS, F <sub>4</sub> Na <sub>2</sub> Pd, Cl <sub>2</sub> PdSe <sub>6</sub> , F <sub>6</sub> Li <sub>2</sub> Pt, ClI, Br <sub>6</sub> Pb <sub>2</sub> Pd, O <sub>6</sub> Se <sub>2</sub> Sn, Cl <sub>6</sub> Pb <sub>2</sub> Pd, F <sub>6</sub> Na <sub>2</sub> Sn, C <sub>2</sub> Li <sub>2</sub> O <sub>4</sub> , C <sub>2</sub> CdO <sub>4</sub> , C <sub>60</sub> Na <sub>2</sub> Rb, N <sub>2</sub> O <sub>4</sub> , F <sub>8</sub> Sn <sub>3</sub> , C <sub>2</sub> Na <sub>2</sub> O <sub>4</sub> , O <sub>3</sub> Rb, F <sub>8</sub> Ge <sub>3</sub> , C <sub>2</sub> Ag <sub>2</sub> O <sub>4</sub> , K <sub>2</sub> MgP <sub>2</sub> Se <sub>6</sub> , CdP <sub>2</sub> Rb <sub>2</sub> Se <sub>6</sub> , C <sub>2</sub> O <sub>4</sub> Tl <sub>2</sub> , Cl <sub>8</sub> PtS <sub>2</sub> , Cl <sub>3</sub> MoO, Cs <sub>2</sub> I <sub>8</sub> , C <sub>4</sub> Na <sub>2</sub> O <sub>4</sub> , Cl <sub>6</sub> HfHg <sub>3</sub> Se <sub>2</sub> , Al <sub>2</sub> Cl <sub>8</sub> Ti, AuBr <sub>4</sub> Rb, AuGa <sub>2</sub> , Al <sub>2</sub> Cl <sub>8</sub> Pd, Au <sub>3</sub> F <sub>8</sub> , Au <sub>4</sub> Ca <sub>5</sub> , AgP <sub>2</sub> , Ag <sub>3</sub> O <sub>4</sub> , B <sub>2</sub> F <sub>4</sub> , BBiO <sub>3</sub> , AsF <sub>6</sub> N <sub>2</sub> S <sub>3</sub> , As <sub>2</sub> La, Ge <sub>2</sub> LaPt <sub>2</sub> , O <sub>2</sub> Re,                                                                                                         |
| 15 | LiO <sub>6</sub> Si <sub>2</sub> Ti, NaO <sub>6</sub> Si <sub>2</sub> Ti, RbTe <sub>6</sub> , BaI <sub>4</sub> La, I <sub>4</sub> LaSr, O <sub>6</sub> Re <sub>2</sub> Sb, BiO <sub>6</sub> Re <sub>2</sub> ,                                                                                                                                                                                                                                                                                                                                                                                                                                                                                                                                                                                                                                                                                                                                                                                                                                                                                                                                                                                                                                                                                                                                                                                                                                                                                                                                                |
| 19 | P <sub>7</sub> Th,                                                                                                                                                                                                                                                                                                                                                                                                                                                                                                                                                                                                                                                                                                                                                                                                                                                                                                                                                                                                                                                                                                                                                                                                                                                                                                                                                                                                                                                                                                                                           |
| 20 | Rb, Cs,                                                                                                                                                                                                                                                                                                                                                                                                                                                                                                                                                                                                                                                                                                                                                                                                                                                                                                                                                                                                                                                                                                                                                                                                                                                                                                                                                                                                                                                                                                                                                      |
| 25 | C <sub>7</sub> B,                                                                                                                                                                                                                                                                                                                                                                                                                                                                                                                                                                                                                                                                                                                                                                                                                                                                                                                                                                                                                                                                                                                                                                                                                                                                                                                                                                                                                                                                                                                                            |
| 29 | N <sub>2</sub> Re,                                                                                                                                                                                                                                                                                                                                                                                                                                                                                                                                                                                                                                                                                                                                                                                                                                                                                                                                                                                                                                                                                                                                                                                                                                                                                                                                                                                                                                                                                                                                           |
| 33 | I <sub>11</sub> Nb <sub>6</sub> ,                                                                                                                                                                                                                                                                                                                                                                                                                                                                                                                                                                                                                                                                                                                                                                                                                                                                                                                                                                                                                                                                                                                                                                                                                                                                                                                                                                                                                                                                                                                            |
| 36 | AsPb <sub>2</sub> Pd <sub>3</sub> , AsF <sub>9</sub> S, CaI <sub>4</sub> N <sub>3</sub> O,                                                                                                                                                                                                                                                                                                                                                                                                                                                                                                                                                                                                                                                                                                                                                                                                                                                                                                                                                                                                                                                                                                                                                                                                                                                                                                                                                                                                                                                                   |
| 39 | LaS,                                                                                                                                                                                                                                                                                                                                                                                                                                                                                                                                                                                                                                                                                                                                                                                                                                                                                                                                                                                                                                                                                                                                                                                                                                                                                                                                                                                                                                                                                                                                                         |
| 43 | Al <sub>3</sub> Hf <sub>2</sub> , Al <sub>3</sub> Zr <sub>2</sub> , Ga <sub>3</sub> Zr <sub>2</sub> , Ga <sub>3</sub> Hf <sub>2</sub> , Ge <sub>5</sub> Y <sub>3</sub> , Cl <sub>12</sub> ReSe <sub>2</sub> , Ba <sub>5</sub> P <sub>9</sub> ,                                                                                                                                                                                                                                                                                                                                                                                                                                                                                                                                                                                                                                                                                                                                                                                                                                                                                                                                                                                                                                                                                                                                                                                                                                                                                                               |
| 44 | C <sub>5</sub> B, LiO <sub>3</sub> , NaO <sub>3</sub> , Ca <sub>28</sub> Ga <sub>11</sub> , Al <sub>4</sub> La, Lu <sub>7</sub> Pd <sub>2</sub> Te <sub>2</sub> ,                                                                                                                                                                                                                                                                                                                                                                                                                                                                                                                                                                                                                                                                                                                                                                                                                                                                                                                                                                                                                                                                                                                                                                                                                                                                                                                                                                                            |
| 47 | NbO,                                                                                                                                                                                                                                                                                                                                                                                                                                                                                                                                                                                                                                                                                                                                                                                                                                                                                                                                                                                                                                                                                                                                                                                                                                                                                                                                                                                                                                                                                                                                                         |
| 51 | AuCd, AuTi, NbPt, AsNb <sub>2</sub> , CsTe <sub>5</sub> TiU, CsTe <sub>5</sub> UZr, CB <sub>2</sub> N, FLiNb <sub>6</sub> O <sub>15</sub> , Nb <sub>2</sub> P,                                                                                                                                                                                                                                                                                                                                                                                                                                                                                                                                                                                                                                                                                                                                                                                                                                                                                                                                                                                                                                                                                                                                                                                                                                                                                                                                                                                               |

Part 2 of all the predicted **Case 3**-TSMs:

|           |                                                                                                                                                                                                                                                                                                                                                                                                                                                                                                                                                                                                                                                                                                                                                                                                                                                                                                                                                                                                                                                                                                                                                                                                                                                                                                                                                                                                                                                                                                                                                                                                                                                                                                                                                                                                                                                                                                                                                                                                                                                                                                                                                                                                                                                                                                                                                                                                                                                                                                                                                                                                                                                                                                                                                                                                                                                                                                                                                                                                                                                                                                                                                                                                                                                                                                                                                                                                                                                                                                               |
|-----------|---------------------------------------------------------------------------------------------------------------------------------------------------------------------------------------------------------------------------------------------------------------------------------------------------------------------------------------------------------------------------------------------------------------------------------------------------------------------------------------------------------------------------------------------------------------------------------------------------------------------------------------------------------------------------------------------------------------------------------------------------------------------------------------------------------------------------------------------------------------------------------------------------------------------------------------------------------------------------------------------------------------------------------------------------------------------------------------------------------------------------------------------------------------------------------------------------------------------------------------------------------------------------------------------------------------------------------------------------------------------------------------------------------------------------------------------------------------------------------------------------------------------------------------------------------------------------------------------------------------------------------------------------------------------------------------------------------------------------------------------------------------------------------------------------------------------------------------------------------------------------------------------------------------------------------------------------------------------------------------------------------------------------------------------------------------------------------------------------------------------------------------------------------------------------------------------------------------------------------------------------------------------------------------------------------------------------------------------------------------------------------------------------------------------------------------------------------------------------------------------------------------------------------------------------------------------------------------------------------------------------------------------------------------------------------------------------------------------------------------------------------------------------------------------------------------------------------------------------------------------------------------------------------------------------------------------------------------------------------------------------------------------------------------------------------------------------------------------------------------------------------------------------------------------------------------------------------------------------------------------------------------------------------------------------------------------------------------------------------------------------------------------------------------------------------------------------------------------------------------------------------------|
| <b>52</b> | Ag <sub>2</sub> BiO <sub>3</sub> , Bi <sub>3</sub> Sr <sub>2</sub> ,                                                                                                                                                                                                                                                                                                                                                                                                                                                                                                                                                                                                                                                                                                                                                                                                                                                                                                                                                                                                                                                                                                                                                                                                                                                                                                                                                                                                                                                                                                                                                                                                                                                                                                                                                                                                                                                                                                                                                                                                                                                                                                                                                                                                                                                                                                                                                                                                                                                                                                                                                                                                                                                                                                                                                                                                                                                                                                                                                                                                                                                                                                                                                                                                                                                                                                                                                                                                                                          |
| <b>55</b> | Al <sub>3</sub> Pd <sub>5</sub> , Al <sub>3</sub> Pt <sub>5</sub> , In <sub>3</sub> Pd <sub>5</sub> , In <sub>4</sub> Pd <sub>2</sub> Y <sub>5</sub> , Bi <sub>9</sub> Ca <sub>9</sub> Cd <sub>4</sub> , In <sub>9</sub> Pb <sub>4</sub> S <sub>17</sub> , Bi <sub>9</sub> Cd <sub>4</sub> Sr <sub>9</sub> , In <sub>5</sub> S <sub>13</sub> Y <sub>4</sub> , In <sub>4</sub> Lu <sub>5</sub> Pd <sub>2</sub> , In <sub>5</sub> La <sub>4</sub> S <sub>13</sub> , Ga <sub>3</sub> Pd <sub>5</sub> , Cl <sub>6</sub> NSc <sub>4</sub> , Bi <sub>9</sub> Ca <sub>9</sub> Zn <sub>4</sub> , BCl <sub>6</sub> Sc <sub>4</sub> , Ca <sub>9</sub> Sb <sub>9</sub> Zn <sub>4</sub> , KNb <sub>8</sub> O <sub>14</sub> ,                                                                                                                                                                                                                                                                                                                                                                                                                                                                                                                                                                                                                                                                                                                                                                                                                                                                                                                                                                                                                                                                                                                                                                                                                                                                                                                                                                                                                                                                                                                                                                                                                                                                                                                                                                                                                                                                                                                                                                                                                                                                                                                                                                                                                                                                                                                                                                                                                                                                                                                                                                                                                                                                                                                                                                                              |
| <b>56</b> | Cl <sub>6</sub> ReSe <sub>4</sub> ,                                                                                                                                                                                                                                                                                                                                                                                                                                                                                                                                                                                                                                                                                                                                                                                                                                                                                                                                                                                                                                                                                                                                                                                                                                                                                                                                                                                                                                                                                                                                                                                                                                                                                                                                                                                                                                                                                                                                                                                                                                                                                                                                                                                                                                                                                                                                                                                                                                                                                                                                                                                                                                                                                                                                                                                                                                                                                                                                                                                                                                                                                                                                                                                                                                                                                                                                                                                                                                                                           |
| <b>57</b> | AlCaPd, Cs, BiK <sub>2</sub> Sn, Al <sub>3</sub> Ca <sub>4</sub> Mg, GaHf, Hg <sub>7</sub> K <sub>5</sub> , InTh, ThTl,                                                                                                                                                                                                                                                                                                                                                                                                                                                                                                                                                                                                                                                                                                                                                                                                                                                                                                                                                                                                                                                                                                                                                                                                                                                                                                                                                                                                                                                                                                                                                                                                                                                                                                                                                                                                                                                                                                                                                                                                                                                                                                                                                                                                                                                                                                                                                                                                                                                                                                                                                                                                                                                                                                                                                                                                                                                                                                                                                                                                                                                                                                                                                                                                                                                                                                                                                                                       |
| <b>58</b> | BPd <sub>2</sub> , AuN <sub>2</sub> , LiO <sub>2</sub> , AlAu <sub>2</sub> , NPd <sub>2</sub> , LiO <sub>2</sub> Tl, NaO <sub>2</sub> , Hf <sub>2</sub> P, Ba <sub>8</sub> PdSe <sub>16</sub> U <sub>2</sub> , Nb <sub>5</sub> O <sub>17</sub> Sr <sub>5</sub> , C <sub>60</sub> K,                                                                                                                                                                                                                                                                                                                                                                                                                                                                                                                                                                                                                                                                                                                                                                                                                                                                                                                                                                                                                                                                                                                                                                                                                                                                                                                                                                                                                                                                                                                                                                                                                                                                                                                                                                                                                                                                                                                                                                                                                                                                                                                                                                                                                                                                                                                                                                                                                                                                                                                                                                                                                                                                                                                                                                                                                                                                                                                                                                                                                                                                                                                                                                                                                           |
| <b>59</b> | NbPt <sub>3</sub> , Pt <sub>3</sub> Ta, ClLiNTi, BrOTi, NbPd <sub>3</sub> , C <sub>4</sub> I <sub>8</sub> OY <sub>9</sub> , Ag <sub>3</sub> Sn, Au <sub>3</sub> Hf, Au <sub>3</sub> Zr, Bi <sub>5</sub> K <sub>6</sub> Zn, AsPdZr, Ba <sub>7</sub> Ga <sub>4</sub> Sb <sub>9</sub> , Br <sub>3</sub> La <sub>6</sub> Si <sub>7</sub> ,                                                                                                                                                                                                                                                                                                                                                                                                                                                                                                                                                                                                                                                                                                                                                                                                                                                                                                                                                                                                                                                                                                                                                                                                                                                                                                                                                                                                                                                                                                                                                                                                                                                                                                                                                                                                                                                                                                                                                                                                                                                                                                                                                                                                                                                                                                                                                                                                                                                                                                                                                                                                                                                                                                                                                                                                                                                                                                                                                                                                                                                                                                                                                                        |
| <b>60</b> | F <sub>4</sub> NaTi, S <sub>5</sub> U <sub>2</sub> , O <sub>2</sub> Re,                                                                                                                                                                                                                                                                                                                                                                                                                                                                                                                                                                                                                                                                                                                                                                                                                                                                                                                                                                                                                                                                                                                                                                                                                                                                                                                                                                                                                                                                                                                                                                                                                                                                                                                                                                                                                                                                                                                                                                                                                                                                                                                                                                                                                                                                                                                                                                                                                                                                                                                                                                                                                                                                                                                                                                                                                                                                                                                                                                                                                                                                                                                                                                                                                                                                                                                                                                                                                                       |
| <b>61</b> | AgF <sub>2</sub> ,                                                                                                                                                                                                                                                                                                                                                                                                                                                                                                                                                                                                                                                                                                                                                                                                                                                                                                                                                                                                                                                                                                                                                                                                                                                                                                                                                                                                                                                                                                                                                                                                                                                                                                                                                                                                                                                                                                                                                                                                                                                                                                                                                                                                                                                                                                                                                                                                                                                                                                                                                                                                                                                                                                                                                                                                                                                                                                                                                                                                                                                                                                                                                                                                                                                                                                                                                                                                                                                                                            |
| <b>62</b> | InPdSr, AlCaPt, PtSnY, InPtSr, As <sub>2</sub> Sc <sub>3</sub> , AlGe <sub>3</sub> Y <sub>2</sub> , AgAlCsF <sub>6</sub> , AgAsF <sub>7</sub> , AlMgSi, AlPd <sub>2</sub> , AlAu <sub>2</sub> , Cs, AlAuY, AlY <sub>2</sub> , AlPt <sub>2</sub> , AsMo, AlPd <sub>5</sub> , AgSc <sub>6</sub> Te <sub>2</sub> , AgTe <sub>2</sub> Y <sub>6</sub> , AgSr, As <sub>3</sub> Ti <sub>5</sub> , FNaNbO <sub>2</sub> , Ba <sub>3</sub> I <sub>2</sub> P <sub>3</sub> , F <sub>5</sub> K <sub>2</sub> Ti, Bi <sub>3</sub> Ca <sub>5</sub> , Bi <sub>3</sub> Sr <sub>5</sub> , GaPd <sub>2</sub> , AgBa, C <sub>2</sub> MoY, PW, O <sub>3</sub> TiY, P <sub>2</sub> Sc <sub>3</sub> , AgF <sub>3</sub> K, C <sub>2</sub> WY, PPd <sub>3</sub> , PdSbZr, PdScSi, Pd <sub>2</sub> Tl, PdSnY, PdYZn, GeNbPt, PdY <sub>3</sub> , PtY, PtScSi, PtSiY, AgCaGe, Pd <sub>2</sub> SiY, GePd <sub>2</sub> Y, GePtSc, GePtY, Pt <sub>2</sub> SiY, Ge <sub>2</sub> LiSr, YZn <sub>3</sub> , PtSc <sub>3</sub> Si <sub>3</sub> , CaGaPt, P <sub>3</sub> Pd <sub>4</sub> Zr <sub>3</sub> , GeNb <sub>3</sub> Te <sub>6</sub> , CaInPd, CaInPt, CaGe <sub>2</sub> Li, Ge <sub>4</sub> Hf <sub>2</sub> Nb <sub>3</sub> , CaLiSi <sub>2</sub> , Si <sub>4</sub> Y <sub>5</sub> , Sb <sub>3</sub> Zr <sub>5</sub> , CaNbO <sub>3</sub> , Ge <sub>4</sub> Nb <sub>5</sub> , Ge <sub>4</sub> Nb <sub>3</sub> Zr <sub>2</sub> , Ge <sub>4</sub> Nb <sub>3</sub> Y <sub>2</sub> , Ge <sub>4</sub> Nb <sub>3</sub> Sc <sub>2</sub> , Ge <sub>4</sub> Hf <sub>4</sub> Nb, Ge <sub>4</sub> Sc <sub>5</sub> , CaPtSb, Ge <sub>4</sub> Y <sub>5</sub> , Ca <sub>2</sub> In, AgAuF <sub>7</sub> , Pt <sub>4</sub> Y <sub>5</sub> , Hg <sub>6</sub> K, Hf <sub>5</sub> Sb <sub>3</sub> , InPd <sub>2</sub> , Hf <sub>3</sub> P <sub>3</sub> Pd <sub>4</sub> , Hf <sub>3</sub> PdSb <sub>7</sub> , Ca <sub>5</sub> Sb <sub>3</sub> , SiTa <sub>3</sub> Te <sub>6</sub> , Sb <sub>3</sub> Sr <sub>5</sub> , PdSb <sub>7</sub> Zr <sub>3</sub> , N, N <sub>3</sub> Nb <sub>2</sub> , NaO <sub>4</sub> Ti <sub>2</sub> , NbO <sub>3</sub> Sr, NbPdSi, NbPtSi, NbPdTe <sub>5</sub> , Nb <sub>2</sub> P <sub>5</sub> , Nb <sub>3</sub> Sc <sub>2</sub> Si <sub>4</sub> , Nb <sub>3</sub> SiTe <sub>6</sub> , LaSi, LuPt, LaPdZn, GeLa, AuLu <sub>2</sub> , LaPtSn, LuPtSi, GeLuPt, LuPd <sub>2</sub> Si, LuZn <sub>3</sub> , GaPd <sub>2</sub> U, GeLaPd <sub>2</sub> , GeLuPd <sub>2</sub> , LaO <sub>3</sub> Ti, LaO <sub>3</sub> Pd, GeLa <sub>3</sub> , NaO <sub>3</sub> U, Lu <sub>3</sub> Pt, LuPt <sub>2</sub> Si, Au <sub>2</sub> In <sub>4</sub> La, Ge <sub>4</sub> Nb <sub>3</sub> U <sub>2</sub> , Ge <sub>4</sub> Lu <sub>2</sub> Nb <sub>3</sub> , Ge <sub>4</sub> Ta <sub>3</sub> U <sub>2</sub> , Ge <sub>4</sub> Lu <sub>5</sub> , Cl <sub>5</sub> K <sub>2</sub> U, Ge <sub>4</sub> La <sub>5</sub> , PRe <sub>2</sub> , Br <sub>5</sub> K <sub>2</sub> U, Cl <sub>5</sub> Rb <sub>2</sub> U, AuLu <sub>6</sub> Te <sub>2</sub> , AgLu <sub>6</sub> Te <sub>2</sub> , Lu <sub>5</sub> Pt <sub>4</sub> , La <sub>5</sub> Sn <sub>4</sub> , La <sub>5</sub> Pb <sub>4</sub> , Ba <sub>2</sub> O <sub>5</sub> Re, La <sub>3</sub> Pd <sub>4</sub> Sn <sub>6</sub> , La <sub>3</sub> MoO <sub>7</sub> , F <sub>8</sub> K <sub>2</sub> Re, P <sub>3</sub> Ti <sub>5</sub> , PtY <sub>3</sub> , Sb <sub>3</sub> Ti <sub>5</sub> , Pb <sub>4</sub> Y <sub>5</sub> , Sn <sub>4</sub> Y <sub>5</sub> , CsTe <sub>6</sub> U, Nb <sub>3</sub> Si, |
| <b>63</b> | AlHf, PdScZn, Ga <sub>2</sub> PdY, Ca <sub>3</sub> Tl <sub>5</sub> , In <sub>7</sub> K <sub>2</sub> Sr, AgCa, AlZr, AuCa, BMo, BW, Ag <sub>7</sub> Ca <sub>2</sub> , B <sub>3</sub> Nb <sub>2</sub> , BiZr, CBMo <sub>2</sub> , CaGa, C <sub>2</sub> B <sub>3</sub> Nb <sub>4</sub> , Cd <sub>3</sub> Y, Cd <sub>7</sub> Sc, GaLi <sub>2</sub> , GeSc, GeY, Ga <sub>3</sub> PdSr, Ge <sub>2</sub> Sc, Ca <sub>3</sub> Ga <sub>5</sub> , Ge <sub>3</sub> Y, HfSb, InLi <sub>2</sub> , As <sub>7</sub> Rb <sub>4</sub> Zn <sub>7</sub> , Li <sub>2</sub> Tl, Hf <sub>3</sub> Sc, NaSi <sub>6</sub> , K <sub>3</sub> O <sub>4</sub> Pd <sub>2</sub> , K <sub>4</sub> P <sub>3</sub> , Ge <sub>4</sub> Li <sub>9</sub> , Pb <sub>2</sub> Y, Ca <sub>4</sub> P <sub>5</sub> Pd <sub>5</sub> , O <sub>4</sub> PTi, PdY, PtScZn, SiY, Sn <sub>2</sub> Y, NbZn <sub>16</sub> , Te <sub>3</sub> Y, PtTaTe <sub>5</sub> , Pd <sub>2</sub> Si <sub>3</sub> Y <sub>3</sub> , Na <sub>9</sub> Sn <sub>4</sub> , Sr <sub>3</sub> Tl <sub>5</sub> , Ge <sub>6</sub> Li <sub>11</sub> , KMo <sub>5</sub> O <sub>13</sub> , Ca <sub>7</sub> Li <sub>5</sub> Sn <sub>11</sub> , P <sub>5</sub> Pd <sub>5</sub> Sr <sub>4</sub> , AuTh, AlTh, LuSi, LaPd, LaPt, LaSn, LuSn <sub>2</sub> , Ge <sub>2</sub> Lu, CBU, Ga <sub>2</sub> LuPd, LaMg <sub>2</sub> Pd, In <sub>2</sub> LaPd, Cd <sub>2</sub> LaPd, LaPdSn <sub>2</sub> , BaLaSi <sub>2</sub> , Cd <sub>3</sub> Lu, Ge <sub>2</sub> LaPd, LaZn <sub>4</sub> , S <sub>3</sub> ScU, LaSeTe <sub>2</sub> , LuTe <sub>3</sub> , Ge <sub>2</sub> LaPt, LaTe <sub>3</sub> , LaPtSi <sub>2</sub> , I <sub>3</sub> U, Ge <sub>4</sub> Lu <sub>3</sub> ,                                                                                                                                                                                                                                                                                                                                                                                                                                                                                                                                                                                                                                                                                                                                                                                                                                                                                                                                                                                                                                                                                                                                                                                                                                                                                                                                                                                                                                                                                                                                                                                                                                                                                                                                                                                                                           |

Part 3 of all the predicted **Case 3**-TSMs:

|            |                                                                                                                                                                                                                                                                                                                                                                                                                                                                                                                                                                                                                                                                                                                                                                                                                                                                                                                                                                                                                                                                                                    |
|------------|----------------------------------------------------------------------------------------------------------------------------------------------------------------------------------------------------------------------------------------------------------------------------------------------------------------------------------------------------------------------------------------------------------------------------------------------------------------------------------------------------------------------------------------------------------------------------------------------------------------------------------------------------------------------------------------------------------------------------------------------------------------------------------------------------------------------------------------------------------------------------------------------------------------------------------------------------------------------------------------------------------------------------------------------------------------------------------------------------|
| <b>63</b>  | Ga <sub>5</sub> U <sub>3</sub> , Th <sub>3</sub> Tl <sub>5</sub> , In <sub>5</sub> Th <sub>3</sub> , La <sub>3</sub> Sn <sub>4</sub> , La <sub>3</sub> Sn <sub>5</sub> , Ge <sub>3</sub> Li <sub>2</sub> Lu <sub>3</sub> , Lu <sub>7</sub> Te, Al <sub>6</sub> Re, Ge <sub>7</sub> Re <sub>3</sub> , B <sub>7</sub> ReY <sub>3</sub> , BrO <sub>2</sub> U, AuCaIn <sub>2</sub> , Ga <sub>5</sub> Zr <sub>3</sub> , N <sub>5</sub> NaTa <sub>3</sub> , K <sub>3</sub> O <sub>4</sub> Pt <sub>2</sub> ,                                                                                                                                                                                                                                                                                                                                                                                                                                                                                                                                                                                              |
| <b>64</b>  | AgCs <sub>2</sub> F <sub>4</sub> , Bi, Au <sub>10</sub> Ca <sub>4</sub> In <sub>3</sub> , Si, NaTl, BCl <sub>14</sub> Zr <sub>6</sub> , CsI <sub>14</sub> Zr <sub>6</sub> , LaSb <sub>2</sub> , Al <sub>3</sub> Ge <sub>4</sub> La <sub>2</sub> , Au <sub>2</sub> Lu <sub>5</sub> Te <sub>2</sub> , I <sub>14</sub> KZr <sub>6</sub> ,                                                                                                                                                                                                                                                                                                                                                                                                                                                                                                                                                                                                                                                                                                                                                             |
| <b>65</b>  | Cl <sub>2</sub> Na <sub>3</sub> , B <sub>6</sub> Nb <sub>5</sub> , B <sub>6</sub> Ta <sub>5</sub> , Ga <sub>3</sub> Pt <sub>5</sub> , Ca <sub>7</sub> N <sub>2</sub> Tl <sub>3</sub> , P, B <sub>20</sub> Na <sub>3</sub> , C <sub>3</sub> B <sub>6</sub> Nb <sub>7</sub> , C <sub>2</sub> B <sub>3</sub> Y <sub>2</sub> , O <sub>4</sub> UY, La <sub>3</sub> Sn <sub>7</sub> , Cl <sub>5</sub> O <sub>2</sub> U <sub>2</sub> , Ge <sub>10</sub> La <sub>7</sub> Li <sub>8</sub> , Cs <sub>2</sub> KO <sub>14</sub> Si <sub>4</sub> U <sub>2</sub> , C <sub>7</sub> Re <sub>2</sub> Sc <sub>5</sub> ,                                                                                                                                                                                                                                                                                                                                                                                                                                                                                              |
| <b>67</b>  | Ba <sub>2</sub> NaO,                                                                                                                                                                                                                                                                                                                                                                                                                                                                                                                                                                                                                                                                                                                                                                                                                                                                                                                                                                                                                                                                               |
| <b>69</b>  | NPd,                                                                                                                                                                                                                                                                                                                                                                                                                                                                                                                                                                                                                                                                                                                                                                                                                                                                                                                                                                                                                                                                                               |
| <b>70</b>  | Au <sub>4</sub> KS <sub>6</sub> , BPd <sub>6</sub> , C <sub>8</sub> K, C <sub>8</sub> Rb, Nb <sub>3</sub> O <sub>10</sub> U,                                                                                                                                                                                                                                                                                                                                                                                                                                                                                                                                                                                                                                                                                                                                                                                                                                                                                                                                                                       |
| <b>71</b>  | Y <sub>3</sub> Zn <sub>11</sub> , AgCa <sub>2</sub> Pd <sub>2</sub> , AlSi <sub>2</sub> Y <sub>2</sub> , Au <sub>3</sub> Rb <sub>2</sub> , Br, Ba <sub>3</sub> Hg <sub>10</sub> In, NbPd <sub>2</sub> , NbPt <sub>2</sub> , Hg <sub>11</sub> K <sub>3</sub> , Pd <sub>2</sub> Ta, Br <sub>6</sub> NaO <sub>2</sub> W <sub>2</sub> , In <sub>11</sub> Sr <sub>3</sub> , AlLu <sub>2</sub> Si <sub>2</sub> , KSe <sub>6</sub> U <sub>2</sub> , KSe <sub>6</sub> Th <sub>2</sub> , La <sub>3</sub> Pd <sub>4</sub> Zn <sub>4</sub> , Ge <sub>5</sub> La, La <sub>3</sub> Pd <sub>4</sub> Si <sub>4</sub> , Ge <sub>4</sub> La <sub>3</sub> Pd <sub>4</sub> , Se <sub>6</sub> TlU <sub>2</sub> , Ge <sub>4</sub> La <sub>3</sub> Li <sub>4</sub> , RbSe <sub>6</sub> Th <sub>2</sub> , Ge <sub>16</sub> La <sub>11</sub> Li <sub>12</sub> , ReSi <sub>2</sub> , La <sub>3</sub> Pt <sub>4</sub> Zn <sub>4</sub> , Au <sub>3</sub> K <sub>2</sub> , B <sub>4</sub> Nb <sub>3</sub> , B <sub>4</sub> Ta <sub>3</sub> , Ba <sub>2</sub> Bi <sub>3</sub> , C <sub>4</sub> B <sub>4</sub> Nb <sub>7</sub> , |
| <b>74</b>  | Au <sub>5</sub> InK <sub>3</sub> , ClNa <sub>2</sub> , Ga <sub>2</sub> Sc, Hg <sub>2</sub> K, Hg <sub>2</sub> Rb, CsHg <sub>2</sub> , P, Si <sub>2</sub> Y, In <sub>2</sub> La, LaZn <sub>2</sub> , LuZn <sub>2</sub> , Ga <sub>2</sub> Lu, LaSi <sub>2</sub> , Au <sub>2</sub> La, Ag <sub>2</sub> La, Ge <sub>2</sub> La, La <sub>3</sub> Pd <sub>5</sub> Si, Au <sub>5</sub> K <sub>3</sub> Tl, Ge <sub>2</sub> NaPd <sub>3</sub> , GaMgMo <sub>4</sub> O <sub>7</sub> ,                                                                                                                                                                                                                                                                                                                                                                                                                                                                                                                                                                                                                        |
| <b>75</b>  | CNSTl, NbTe <sub>4</sub> ,                                                                                                                                                                                                                                                                                                                                                                                                                                                                                                                                                                                                                                                                                                                                                                                                                                                                                                                                                                                                                                                                         |
| <b>79</b>  | Sb <sub>2</sub> TlZn <sub>2</sub> , Al <sub>2</sub> Si <sub>3</sub> U <sub>3</sub> ,                                                                                                                                                                                                                                                                                                                                                                                                                                                                                                                                                                                                                                                                                                                                                                                                                                                                                                                                                                                                               |
| <b>83</b>  | C <sub>4</sub> UW <sub>4</sub> ,                                                                                                                                                                                                                                                                                                                                                                                                                                                                                                                                                                                                                                                                                                                                                                                                                                                                                                                                                                                                                                                                   |
| <b>85</b>  | Hf <sub>5</sub> Sb <sub>9</sub> , AgBF <sub>5</sub> , Se <sub>3</sub> Tl <sub>5</sub> ,                                                                                                                                                                                                                                                                                                                                                                                                                                                                                                                                                                                                                                                                                                                                                                                                                                                                                                                                                                                                            |
| <b>86</b>  | Nb <sub>3</sub> P, GeHf <sub>3</sub> , Hf <sub>3</sub> P, AsNb <sub>3</sub> , AsTi <sub>3</sub> , GeZr <sub>3</sub> , PTi <sub>3</sub> , SiZr <sub>3</sub> , SiTi <sub>3</sub> , AsTa <sub>3</sub> , PTa <sub>3</sub> , GeLa <sub>3</sub> ,                                                                                                                                                                                                                                                                                                                                                                                                                                                                                                                                                                                                                                                                                                                                                                                                                                                        |
| <b>87</b>  | Au <sub>4</sub> Sc, Hg <sub>19</sub> Rb <sub>5</sub> , Ag <sub>4</sub> Sc, N <sub>5</sub> Nb <sub>4</sub> , Nb <sub>5</sub> Se <sub>4</sub> , Nb <sub>5</sub> Te <sub>4</sub> , Nb <sub>5</sub> Sb <sub>4</sub> , As <sub>4</sub> Ta <sub>5</sub> , Sb <sub>4</sub> Ta <sub>5</sub> , As <sub>4</sub> Nb <sub>5</sub> Pd <sub>4</sub> , Nb <sub>5</sub> P <sub>4</sub> Pd <sub>4</sub> , Ba <sub>9</sub> In <sub>4</sub> , Pt <sub>11</sub> Zr <sub>9</sub> , Pt <sub>12</sub> Si <sub>5</sub> , In <sub>4</sub> Pd <sub>17</sub> Se <sub>4</sub> , S <sub>8</sub> Zr <sub>21</sub> , Nb <sub>21</sub> S <sub>8</sub> , Cs <sub>5</sub> Hg <sub>19</sub> , Cs <sub>3</sub> Te <sub>22</sub> , Au <sub>4</sub> Lu, F <sub>5</sub> U, O <sub>6</sub> ReSr <sub>2</sub> Zn, Ba <sub>2</sub> CaO <sub>6</sub> Re,                                                                                                                                                                                                                                                                                      |
| <b>88</b>  | CsFO <sub>3</sub> S, GaMg, O <sub>4</sub> Pd <sub>2</sub> Y, Ge <sub>8</sub> Pd <sub>21</sub> , Al <sub>21</sub> Pd <sub>8</sub> , Al <sub>17</sub> Pd <sub>8</sub> Si <sub>4</sub> , Al <sub>21</sub> Pt <sub>8</sub> , LaO <sub>4</sub> Pd <sub>2</sub> ,                                                                                                                                                                                                                                                                                                                                                                                                                                                                                                                                                                                                                                                                                                                                                                                                                                        |
| <b>92</b>  | MgO <sub>4</sub> Ti <sub>2</sub> , Si <sub>4</sub> Ti <sub>5</sub> , Hf <sub>2</sub> Sc <sub>3</sub> Si <sub>4</sub> , Pr <sub>5</sub> Si <sub>4</sub> , Re <sub>3</sub> Sc <sub>2</sub> Si <sub>4</sub> ,                                                                                                                                                                                                                                                                                                                                                                                                                                                                                                                                                                                                                                                                                                                                                                                                                                                                                         |
| <b>95</b>  | LiNbO <sub>4</sub> Zn,                                                                                                                                                                                                                                                                                                                                                                                                                                                                                                                                                                                                                                                                                                                                                                                                                                                                                                                                                                                                                                                                             |
| <b>97</b>  | ISe <sub>8</sub> Ta <sub>2</sub> ,                                                                                                                                                                                                                                                                                                                                                                                                                                                                                                                                                                                                                                                                                                                                                                                                                                                                                                                                                                                                                                                                 |
| <b>102</b> | U,                                                                                                                                                                                                                                                                                                                                                                                                                                                                                                                                                                                                                                                                                                                                                                                                                                                                                                                                                                                                                                                                                                 |
| <b>103</b> | TaTe <sub>4</sub> , NbTe <sub>4</sub> , NbSe <sub>4</sub> ,                                                                                                                                                                                                                                                                                                                                                                                                                                                                                                                                                                                                                                                                                                                                                                                                                                                                                                                                                                                                                                        |
| <b>104</b> | Ba <sub>5</sub> Bi <sub>5</sub> In <sub>4</sub> ,                                                                                                                                                                                                                                                                                                                                                                                                                                                                                                                                                                                                                                                                                                                                                                                                                                                                                                                                                                                                                                                  |
| <b>107</b> | GeP, PSn, LiPdSi <sub>3</sub> , In <sub>2</sub> Te <sub>3</sub> , AsGe, AuSi <sub>3</sub> Sr, AuBaSn <sub>3</sub> , BaGe <sub>3</sub> Pd, Al <sub>3</sub> AuLa,                                                                                                                                                                                                                                                                                                                                                                                                                                                                                                                                                                                                                                                                                                                                                                                                                                                                                                                                    |

Part 4 of all the predicted **Case 3**-TSMs:

|            |                                                                                                                                                                                                                                                                                                                                                                                                                                                                                                                                                                                                                                                                                                                                                                                                                                                                                                                                                                                                                                                                                                                                                                                                                                                                                                                                                                                                                                                                                                                                                                                                                                                                                                                                                                                                                                                                                                                                 |
|------------|---------------------------------------------------------------------------------------------------------------------------------------------------------------------------------------------------------------------------------------------------------------------------------------------------------------------------------------------------------------------------------------------------------------------------------------------------------------------------------------------------------------------------------------------------------------------------------------------------------------------------------------------------------------------------------------------------------------------------------------------------------------------------------------------------------------------------------------------------------------------------------------------------------------------------------------------------------------------------------------------------------------------------------------------------------------------------------------------------------------------------------------------------------------------------------------------------------------------------------------------------------------------------------------------------------------------------------------------------------------------------------------------------------------------------------------------------------------------------------------------------------------------------------------------------------------------------------------------------------------------------------------------------------------------------------------------------------------------------------------------------------------------------------------------------------------------------------------------------------------------------------------------------------------------------------|
| <b>108</b> | Bi <sub>2</sub> O <sub>4</sub> Pd, Ca <sub>5</sub> Ge <sub>3</sub> , K <sub>2</sub> Se <sub>4</sub> Sn <sub>2</sub> ,                                                                                                                                                                                                                                                                                                                                                                                                                                                                                                                                                                                                                                                                                                                                                                                                                                                                                                                                                                                                                                                                                                                                                                                                                                                                                                                                                                                                                                                                                                                                                                                                                                                                                                                                                                                                           |
| <b>109</b> | AsCaPt, LiMo <sub>8</sub> O <sub>10</sub> , GeLaPt,                                                                                                                                                                                                                                                                                                                                                                                                                                                                                                                                                                                                                                                                                                                                                                                                                                                                                                                                                                                                                                                                                                                                                                                                                                                                                                                                                                                                                                                                                                                                                                                                                                                                                                                                                                                                                                                                             |
| <b>110</b> | As <sub>2</sub> Cd <sub>3</sub> ,                                                                                                                                                                                                                                                                                                                                                                                                                                                                                                                                                                                                                                                                                                                                                                                                                                                                                                                                                                                                                                                                                                                                                                                                                                                                                                                                                                                                                                                                                                                                                                                                                                                                                                                                                                                                                                                                                               |
| <b>113</b> | NaSn <sub>5</sub> , Ta <sub>22</sub> , Ta <sub>30</sub> , Ta,                                                                                                                                                                                                                                                                                                                                                                                                                                                                                                                                                                                                                                                                                                                                                                                                                                                                                                                                                                                                                                                                                                                                                                                                                                                                                                                                                                                                                                                                                                                                                                                                                                                                                                                                                                                                                                                                   |
| <b>115</b> | CB <sub>2</sub> N, PdSb <sub>3</sub> Zr <sub>2</sub> , C <sub>7</sub> B, Hf <sub>2</sub> PdSb <sub>3</sub> ,                                                                                                                                                                                                                                                                                                                                                                                                                                                                                                                                                                                                                                                                                                                                                                                                                                                                                                                                                                                                                                                                                                                                                                                                                                                                                                                                                                                                                                                                                                                                                                                                                                                                                                                                                                                                                    |
| <b>120</b> | Au <sub>4</sub> KSn <sub>2</sub> ,                                                                                                                                                                                                                                                                                                                                                                                                                                                                                                                                                                                                                                                                                                                                                                                                                                                                                                                                                                                                                                                                                                                                                                                                                                                                                                                                                                                                                                                                                                                                                                                                                                                                                                                                                                                                                                                                                              |
| <b>121</b> | Au <sub>12</sub> K <sub>23</sub> Sn <sub>9</sub> ,                                                                                                                                                                                                                                                                                                                                                                                                                                                                                                                                                                                                                                                                                                                                                                                                                                                                                                                                                                                                                                                                                                                                                                                                                                                                                                                                                                                                                                                                                                                                                                                                                                                                                                                                                                                                                                                                              |
| <b>123</b> | AgTi, PtZn, CdPt <sub>2</sub> Zn, AsHgPd <sub>5</sub> , AsGaPd <sub>5</sub> , GaPPd <sub>5</sub> , AsPt <sub>5</sub> Zn, CdPPt <sub>5</sub> , BaBi <sub>2</sub> OTi <sub>2</sub> , In <sub>2</sub> Pd <sub>8</sub> Se, BaNb <sub>4</sub> O <sub>6</sub> , BaNb <sub>7</sub> O <sub>9</sub> , AlTi, AlPt <sub>3</sub> , AgZr <sub>3</sub> , AgHg <sub>2</sub> Ti, AsCdPd <sub>5</sub> , CaPb, CdPd, CdPt, InMg, Au <sub>3</sub> Cd, PdTi, SnTi, HgPd, GaTi, HgPt, SiSr, Cd <sub>3</sub> Zr, Hg <sub>2</sub> Pt, Pd <sub>3</sub> Tl, InPd <sub>3</sub> , BaBi <sub>3</sub> , As <sub>2</sub> BaPd <sub>2</sub> , Sr, BaP <sub>2</sub> Pd <sub>2</sub> , InPt <sub>3</sub> , AsInPd <sub>5</sub> , AuCl <sub>3</sub> Cs, AsPd <sub>5</sub> Tl, AlPPt <sub>5</sub> , HgPd <sub>5</sub> Se, CdPd <sub>5</sub> Se, MgPPd <sub>5</sub> , InPd <sub>5</sub> Se, CdPPd <sub>5</sub> , Pd <sub>5</sub> SeTl, Pd <sub>5</sub> SeZn, HgPPd <sub>5</sub> , InPPd <sub>5</sub> , AsMgPt <sub>5</sub> , CGaPt <sub>3</sub> , AsCdPt <sub>5</sub> , PPd <sub>5</sub> Zn, AgPPt <sub>5</sub> , PPd <sub>5</sub> Tl, PPd <sub>5</sub> Sn, AsPt <sub>5</sub> Tl, AgPt <sub>5</sub> Si, Pt <sub>5</sub> SbSi, MgPPt <sub>5</sub> , PPt <sub>5</sub> Zn, InPPt <sub>5</sub> , PbPt <sub>5</sub> Si, Pt <sub>5</sub> SiTl, FKNb <sub>4</sub> O <sub>5</sub> , InPt <sub>5</sub> Si, PPt <sub>5</sub> Tl, PPt <sub>5</sub> Sn, AsIn <sub>2</sub> Pt <sub>8</sub> , Nb <sub>5</sub> O <sub>9</sub> Sr <sub>2</sub> , KO <sub>5</sub> S <sub>2</sub> Ti <sub>2</sub> Y <sub>2</sub> , Ba <sub>2</sub> Nb <sub>5</sub> O <sub>9</sub> , Nb <sub>4</sub> O <sub>6</sub> Sr, AsLa, AgLa, CdLa, LaSb, Ga <sub>5</sub> PdU, Ga <sub>6</sub> LaPd, Ga <sub>5</sub> PtU, C <sub>2</sub> Re,                                                                                                                                                                     |
| <b>124</b> | NbTe <sub>4</sub> , TaTe <sub>4</sub> ,                                                                                                                                                                                                                                                                                                                                                                                                                                                                                                                                                                                                                                                                                                                                                                                                                                                                                                                                                                                                                                                                                                                                                                                                                                                                                                                                                                                                                                                                                                                                                                                                                                                                                                                                                                                                                                                                                         |
| <b>125</b> | Ga <sub>6</sub> Y, Ag <sub>5</sub> RbSe <sub>3</sub> , Ga <sub>6</sub> La,                                                                                                                                                                                                                                                                                                                                                                                                                                                                                                                                                                                                                                                                                                                                                                                                                                                                                                                                                                                                                                                                                                                                                                                                                                                                                                                                                                                                                                                                                                                                                                                                                                                                                                                                                                                                                                                      |
| <b>126</b> | Cd <sub>32</sub> K <sub>6</sub> ,                                                                                                                                                                                                                                                                                                                                                                                                                                                                                                                                                                                                                                                                                                                                                                                                                                                                                                                                                                                                                                                                                                                                                                                                                                                                                                                                                                                                                                                                                                                                                                                                                                                                                                                                                                                                                                                                                               |
| <b>127</b> | Hg <sub>5</sub> Pd <sub>2</sub> , Hf <sub>2</sub> In <sub>5</sub> , Be <sub>2</sub> Nb <sub>3</sub> , AlSc <sub>2</sub> Si <sub>2</sub> , Au <sub>2</sub> Ca <sub>2</sub> Pb, PbPd <sub>2</sub> Y <sub>2</sub> , InPd <sub>2</sub> Y <sub>2</sub> , LiSi <sub>2</sub> Y <sub>2</sub> , B <sub>2</sub> Nb <sub>3</sub> , B <sub>2</sub> Mo <sub>3</sub> , Ga <sub>2</sub> Nb <sub>3</sub> , Ga <sub>2</sub> MgSc <sub>2</sub> , Ca <sub>3</sub> Hg <sub>2</sub> , Be <sub>2</sub> Ta <sub>3</sub> , B <sub>2</sub> Mo <sub>2</sub> Nb, Au <sub>2</sub> InY <sub>2</sub> , B <sub>2</sub> Mo <sub>2</sub> Ta, B <sub>2</sub> Ta <sub>3</sub> , C <sub>2</sub> B <sub>2</sub> Y, In <sub>5</sub> Ti <sub>2</sub> , Ga <sub>5</sub> W <sub>2</sub> , Hg <sub>2</sub> Sr <sub>3</sub> , Ge <sub>2</sub> Hf <sub>3</sub> , Ga <sub>2</sub> Ta <sub>3</sub> , Mo <sub>3</sub> Si <sub>2</sub> , Nb <sub>3</sub> Si <sub>2</sub> , Si <sub>2</sub> W <sub>3</sub> , LiPd <sub>2</sub> Sn <sub>6</sub> , KMo <sub>4</sub> O <sub>6</sub> , Mo <sub>4</sub> NaO <sub>6</sub> , Mo <sub>4</sub> O <sub>6</sub> Sn, B <sub>4</sub> W, InPd <sub>2</sub> Th <sub>2</sub> , C <sub>2</sub> B <sub>2</sub> La, B <sub>4</sub> Th, InLa <sub>2</sub> Pd <sub>2</sub> , InPd <sub>2</sub> U <sub>2</sub> , Ge <sub>2</sub> InLa <sub>2</sub> , InLu <sub>2</sub> Pd <sub>2</sub> , C <sub>2</sub> B <sub>2</sub> Lu, Ge <sub>2</sub> Lu <sub>2</sub> Mg, La <sub>2</sub> PbPd <sub>2</sub> , InPt <sub>2</sub> U <sub>2</sub> , La <sub>3</sub> Si <sub>2</sub> , N <sub>2</sub> Re, O <sub>3</sub> Re, B <sub>2</sub> ReTi <sub>2</sub> , ClF <sub>6</sub> K <sub>3</sub> Re, Pd <sub>2</sub> SnU <sub>2</sub> , Lu <sub>2</sub> PbPd <sub>2</sub> , Pt <sub>2</sub> SnU <sub>2</sub> , Ba <sub>3</sub> O <sub>15</sub> Ta <sub>5</sub> , Al <sub>2</sub> Th <sub>3</sub> , Ga <sub>2</sub> Th <sub>3</sub> , Ge <sub>2</sub> Th <sub>3</sub> , |
| <b>128</b> | Cl <sub>6</sub> K <sub>2</sub> Nb, F <sub>14</sub> K <sub>5</sub> Ti <sub>3</sub> , Re <sub>3</sub> Si <sub>5</sub> Y <sub>2</sub> , Pd <sub>4</sub> Rb <sub>2</sub> Se <sub>17</sub> U <sub>6</sub> ,                                                                                                                                                                                                                                                                                                                                                                                                                                                                                                                                                                                                                                                                                                                                                                                                                                                                                                                                                                                                                                                                                                                                                                                                                                                                                                                                                                                                                                                                                                                                                                                                                                                                                                                          |
| <b>129</b> | AuHf, BBe <sub>4</sub> , PSnSr, AuTi, AgZr, AsNbSi, AgTi, SiTiY, PdTa, BiIn, AgHf, S <sub>2</sub> Y, GeTiY, AsSiTa, GeTeZr, SbSc <sub>2</sub> , MoNTa, GeSbTi, GeSbZr, AgMgSb, NbSbSi, BaMgSi, Te <sub>2</sub> Y, BiKMg, Sn <sub>2</sub> YZn, Au <sub>2</sub> BaSn <sub>2</sub> , As <sub>2</sub> Pt <sub>2</sub> Sr, Au <sub>3</sub> BaGe, Au <sub>3</sub> GeSr, Pt <sub>2</sub> Si <sub>2</sub> Y, Au <sub>3</sub> BaSi, Bi <sub>9</sub> Ti <sub>8</sub> , AsSeTh, Al <sub>2</sub> Au <sub>2</sub> U, GeLaTi, AsSU, BiSbU, AsSbU, BiTeTh, BiTeU, LaS <sub>2</sub> , AsSeU, As <sub>2</sub> Pa, LuS <sub>2</sub> , Al <sub>2</sub> LaPd <sub>2</sub> , LaPdSb <sub>2</sub> , Ga <sub>2</sub> LaPd <sub>2</sub> , LaTe <sub>2</sub> , AsTeTh, P <sub>2</sub> Pa, Al <sub>2</sub> Au <sub>2</sub> La, NTeU, PaSb <sub>2</sub> , BiLa <sub>2</sub> N, SbTeTh, PSeU, PSeTh, GeLuTi, Bi <sub>2</sub> Th, As <sub>2</sub> Th, PSU, PSTh, LuSe <sub>2</sub> , Bi <sub>2</sub> U, SSbU, AuSb <sub>2</sub> U,                                                                                                                                                                                                                                                                                                                                                                                                                                                                                                                                                                                                                                                                                                                                                                                                                                                                                                                           |

Part 5 of all the predicted **Case 3**-TSMs:

|            |                                                                                                                                                                                                                                                                                                                                                                                                                                                                                                                                                                                                                                                                                                                                                                                                                                                                                                                                                                                                                                                                                                                                                                                                                                                                                                                                                                                                                                                                                                                                                                                                                                                                                                                                                                                                                                                                                                                                                                                                                                                                                                                                                                                                                                                                                                                                                                                                                                                                                                                                                                                                                                                                                                                                                                                                                                                                                                                                                                                                                                                                                                                                                                                                                                                                                                                                                                                                                                                                                                                                                                                                                                                                                                                                                                                                                                                                                                                                                                                                                                                                                                                                                                                                                                                          |
|------------|----------------------------------------------------------------------------------------------------------------------------------------------------------------------------------------------------------------------------------------------------------------------------------------------------------------------------------------------------------------------------------------------------------------------------------------------------------------------------------------------------------------------------------------------------------------------------------------------------------------------------------------------------------------------------------------------------------------------------------------------------------------------------------------------------------------------------------------------------------------------------------------------------------------------------------------------------------------------------------------------------------------------------------------------------------------------------------------------------------------------------------------------------------------------------------------------------------------------------------------------------------------------------------------------------------------------------------------------------------------------------------------------------------------------------------------------------------------------------------------------------------------------------------------------------------------------------------------------------------------------------------------------------------------------------------------------------------------------------------------------------------------------------------------------------------------------------------------------------------------------------------------------------------------------------------------------------------------------------------------------------------------------------------------------------------------------------------------------------------------------------------------------------------------------------------------------------------------------------------------------------------------------------------------------------------------------------------------------------------------------------------------------------------------------------------------------------------------------------------------------------------------------------------------------------------------------------------------------------------------------------------------------------------------------------------------------------------------------------------------------------------------------------------------------------------------------------------------------------------------------------------------------------------------------------------------------------------------------------------------------------------------------------------------------------------------------------------------------------------------------------------------------------------------------------------------------------------------------------------------------------------------------------------------------------------------------------------------------------------------------------------------------------------------------------------------------------------------------------------------------------------------------------------------------------------------------------------------------------------------------------------------------------------------------------------------------------------------------------------------------------------------------------------------------------------------------------------------------------------------------------------------------------------------------------------------------------------------------------------------------------------------------------------------------------------------------------------------------------------------------------------------------------------------------------------------------------------------------------------------------------------|
| <b>129</b> | LuTe <sub>2</sub> , SbSeU, LuSiTi, LaPd <sub>2</sub> Sb <sub>2</sub> , LaSe <sub>2</sub> , SbSeTh, Sb <sub>2</sub> Th, AuBi <sub>2</sub> La, LuSn <sub>2</sub> Zn, Te <sub>2</sub> U, SbTeU, Au <sub>2</sub> Si <sub>2</sub> U, Ge <sub>2</sub> LaPt <sub>2</sub> , Pt <sub>2</sub> Si <sub>2</sub> U, LaPt <sub>2</sub> Si <sub>2</sub> , AsSTh, AsTeU,                                                                                                                                                                                                                                                                                                                                                                                                                                                                                                                                                                                                                                                                                                                                                                                                                                                                                                                                                                                                                                                                                                                                                                                                                                                                                                                                                                                                                                                                                                                                                                                                                                                                                                                                                                                                                                                                                                                                                                                                                                                                                                                                                                                                                                                                                                                                                                                                                                                                                                                                                                                                                                                                                                                                                                                                                                                                                                                                                                                                                                                                                                                                                                                                                                                                                                                                                                                                                                                                                                                                                                                                                                                                                                                                                                                                                                                                                                 |
| <b>130</b> | AlMg <sub>4</sub> Si <sub>3</sub> , Se <sub>3</sub> Tl <sub>5</sub> , AuBi <sub>2</sub> O <sub>5</sub> , Ge <sub>3</sub> La <sub>5</sub> ,                                                                                                                                                                                                                                                                                                                                                                                                                                                                                                                                                                                                                                                                                                                                                                                                                                                                                                                                                                                                                                                                                                                                                                                                                                                                                                                                                                                                                                                                                                                                                                                                                                                                                                                                                                                                                                                                                                                                                                                                                                                                                                                                                                                                                                                                                                                                                                                                                                                                                                                                                                                                                                                                                                                                                                                                                                                                                                                                                                                                                                                                                                                                                                                                                                                                                                                                                                                                                                                                                                                                                                                                                                                                                                                                                                                                                                                                                                                                                                                                                                                                                                               |
| <b>131</b> | OPd, NPd, C <sub>2</sub> B <sub>2</sub> Lu, C <sub>2</sub> B <sub>2</sub> La,                                                                                                                                                                                                                                                                                                                                                                                                                                                                                                                                                                                                                                                                                                                                                                                                                                                                                                                                                                                                                                                                                                                                                                                                                                                                                                                                                                                                                                                                                                                                                                                                                                                                                                                                                                                                                                                                                                                                                                                                                                                                                                                                                                                                                                                                                                                                                                                                                                                                                                                                                                                                                                                                                                                                                                                                                                                                                                                                                                                                                                                                                                                                                                                                                                                                                                                                                                                                                                                                                                                                                                                                                                                                                                                                                                                                                                                                                                                                                                                                                                                                                                                                                                            |
| <b>132</b> | O <sub>2</sub> Si, Bi <sub>2</sub> O <sub>3</sub> ,                                                                                                                                                                                                                                                                                                                                                                                                                                                                                                                                                                                                                                                                                                                                                                                                                                                                                                                                                                                                                                                                                                                                                                                                                                                                                                                                                                                                                                                                                                                                                                                                                                                                                                                                                                                                                                                                                                                                                                                                                                                                                                                                                                                                                                                                                                                                                                                                                                                                                                                                                                                                                                                                                                                                                                                                                                                                                                                                                                                                                                                                                                                                                                                                                                                                                                                                                                                                                                                                                                                                                                                                                                                                                                                                                                                                                                                                                                                                                                                                                                                                                                                                                                                                      |
| <b>134</b> | B, Ag <sub>2</sub> Li <sub>3</sub> Si <sub>3</sub> , Ag <sub>2</sub> Ge <sub>3</sub> Li <sub>3</sub> , B,                                                                                                                                                                                                                                                                                                                                                                                                                                                                                                                                                                                                                                                                                                                                                                                                                                                                                                                                                                                                                                                                                                                                                                                                                                                                                                                                                                                                                                                                                                                                                                                                                                                                                                                                                                                                                                                                                                                                                                                                                                                                                                                                                                                                                                                                                                                                                                                                                                                                                                                                                                                                                                                                                                                                                                                                                                                                                                                                                                                                                                                                                                                                                                                                                                                                                                                                                                                                                                                                                                                                                                                                                                                                                                                                                                                                                                                                                                                                                                                                                                                                                                                                                |
| <b>135</b> | CB <sub>2</sub> Y,                                                                                                                                                                                                                                                                                                                                                                                                                                                                                                                                                                                                                                                                                                                                                                                                                                                                                                                                                                                                                                                                                                                                                                                                                                                                                                                                                                                                                                                                                                                                                                                                                                                                                                                                                                                                                                                                                                                                                                                                                                                                                                                                                                                                                                                                                                                                                                                                                                                                                                                                                                                                                                                                                                                                                                                                                                                                                                                                                                                                                                                                                                                                                                                                                                                                                                                                                                                                                                                                                                                                                                                                                                                                                                                                                                                                                                                                                                                                                                                                                                                                                                                                                                                                                                       |
| <b>136</b> | InPd <sub>2</sub> Sc <sub>2</sub> , BiPb <sub>3</sub> Pt, Ta, O <sub>2</sub> Pd, NbO <sub>2</sub> , NTi <sub>2</sub> , O <sub>2</sub> Pt, Au <sub>2</sub> InSc <sub>2</sub> , Au <sub>2</sub> Sc <sub>2</sub> Sn, Au <sub>2</sub> InZr <sub>2</sub> , InPd <sub>2</sub> Zr <sub>2</sub> , F <sub>6</sub> Na <sub>2</sub> Nb, Au <sub>2</sub> Hf <sub>2</sub> In, Hf <sub>2</sub> InPd <sub>2</sub> , Au <sub>2</sub> SnY <sub>2</sub> , Au <sub>2</sub> SnY <sub>2</sub> , AuTa <sub>2</sub> , Al <sub>2</sub> Pt <sub>4</sub> Ti <sub>9</sub> , AlTa <sub>2</sub> , Ca <sub>11</sub> N <sub>8</sub> , Ga <sub>6</sub> Na <sub>10</sub> Sn <sub>3</sub> , InPt <sub>2</sub> U <sub>2</sub> , Au <sub>2</sub> Lu <sub>2</sub> Sn, Au <sub>2</sub> InLu <sub>2</sub> , Pt <sub>2</sub> SnU <sub>2</sub> , U, O <sub>2</sub> Re, Re <sub>4</sub> Si <sub>2</sub> Y, AlNb <sub>2</sub> , Bi <sub>2</sub> MgO <sub>6</sub> , O <sub>2</sub> Pb,                                                                                                                                                                                                                                                                                                                                                                                                                                                                                                                                                                                                                                                                                                                                                                                                                                                                                                                                                                                                                                                                                                                                                                                                                                                                                                                                                                                                                                                                                                                                                                                                                                                                                                                                                                                                                                                                                                                                                                                                                                                                                                                                                                                                                                                                                                                                                                                                                                                                                                                                                                                                                                                                                                                                                                                                                                                                                                                                                                                                                                                                                                                                                                                                                                                                                                               |
| <b>137</b> | Bi <sub>2</sub> Se <sub>3</sub> , Cd <sub>3</sub> P <sub>2</sub> , TeTl, As <sub>2</sub> Cd <sub>3</sub> , B <sub>4</sub> Re <sub>4</sub> Y, Nb <sub>4</sub> O <sub>5</sub> ,                                                                                                                                                                                                                                                                                                                                                                                                                                                                                                                                                                                                                                                                                                                                                                                                                                                                                                                                                                                                                                                                                                                                                                                                                                                                                                                                                                                                                                                                                                                                                                                                                                                                                                                                                                                                                                                                                                                                                                                                                                                                                                                                                                                                                                                                                                                                                                                                                                                                                                                                                                                                                                                                                                                                                                                                                                                                                                                                                                                                                                                                                                                                                                                                                                                                                                                                                                                                                                                                                                                                                                                                                                                                                                                                                                                                                                                                                                                                                                                                                                                                            |
| <b>139</b> | AlAu <sub>2</sub> , Au <sub>2</sub> Ti, AuZr <sub>2</sub> , MoSi <sub>2</sub> , GeSb, Ge <sub>2</sub> W, Al <sub>4</sub> Ca, BaGa <sub>4</sub> , Al <sub>4</sub> Sr, Ga <sub>4</sub> Sr, Be <sub>12</sub> Ti, B <sub>12</sub> Sc, AlI <sub>2</sub> Pd <sub>5</sub> , AgCs <sub>2</sub> F <sub>4</sub> , Na <sub>2</sub> OSb <sub>2</sub> Ti <sub>2</sub> , CaGe <sub>3</sub> , AuORb, Cl <sub>10</sub> K <sub>4</sub> OW <sub>2</sub> , Ag <sub>2</sub> Sc, Ag <sub>2</sub> Y, AgHf <sub>2</sub> , Al <sub>2</sub> BaSi <sub>2</sub> , Ag <sub>2</sub> Si <sub>2</sub> Sr, Ag <sub>2</sub> Sn <sub>2</sub> Sr, Ag <sub>2</sub> Ge <sub>2</sub> Sr, Al <sub>2</sub> Pb <sub>2</sub> Sr, Al <sub>3</sub> Nb, Al <sub>3</sub> Ti, Al <sub>3</sub> Ta, AgBe <sub>12</sub> , Br, In <sub>4</sub> Sr, AuHf <sub>2</sub> , Au <sub>2</sub> Nb <sub>3</sub> , CdTi <sub>2</sub> , Al <sub>4</sub> Ba, Bi, Au <sub>2</sub> Sc, Ga <sub>3</sub> Ta, Au <sub>2</sub> Y, CaGa <sub>4</sub> , Ga, Ga <sub>3</sub> Nb, Sc, Tl, P <sub>2</sub> Pd <sub>2</sub> Y, Be <sub>12</sub> Pd, OPd, AuBe <sub>12</sub> , Au <sub>2</sub> Si <sub>2</sub> Y, BaIn <sub>4</sub> , Ga <sub>4</sub> Na, Cl <sub>2</sub> O <sub>4</sub> Pb <sub>4</sub> , Al <sub>3</sub> Zr, In, AgTi <sub>2</sub> , BiO <sub>2</sub> Y <sub>2</sub> , Hf <sub>2</sub> Tl, Sb, Ga <sub>3</sub> Ti, I, NbPd <sub>3</sub> , S <sub>2</sub> Ti, NbS <sub>2</sub> , C <sub>2</sub> Y, Pd <sub>3</sub> Tl, Be <sub>12</sub> Ta, Au <sub>4</sub> CaCd <sub>2</sub> , Ge <sub>2</sub> Mo, Si <sub>2</sub> W, Pd <sub>2</sub> Si <sub>2</sub> Y, Ga <sub>3</sub> Hf, Pd <sub>3</sub> Ta, Al <sub>2</sub> Pd <sub>5</sub> Y, Ge <sub>2</sub> Pd <sub>2</sub> Sr, Be <sub>12</sub> Pt, N <sub>3</sub> Nb <sub>4</sub> , Pt <sub>2</sub> Si, Rb, Pt <sub>2</sub> Si <sub>2</sub> Y, F <sub>4</sub> Nb, Be <sub>12</sub> Nb, C <sub>2</sub> BSc <sub>2</sub> , GeTiY, Ga <sub>4</sub> Ti <sub>2</sub> Y, KO <sub>2</sub> , In <sub>4</sub> K, C <sub>2</sub> Bi <sub>2</sub> CaO <sub>8</sub> , N <sub>2</sub> Sr, As <sub>2</sub> BaPd <sub>2</sub> , Pt <sub>3</sub> Sb, Ag <sub>2</sub> CaGe <sub>2</sub> , YZn <sub>12</sub> , ScZn <sub>12</sub> , Ga <sub>5</sub> Mg <sub>2</sub> , Cl <sub>6</sub> NbRb <sub>2</sub> , Ge <sub>3</sub> Sr, BaBi <sub>4</sub> Cl <sub>2</sub> O <sub>6</sub> , Ca <sub>2</sub> Na <sub>2</sub> O <sub>10</sub> Ta <sub>3</sub> , Ge <sub>4</sub> In <sub>6</sub> Y <sub>11</sub> , Ge <sub>10</sub> Sc <sub>11</sub> , Sn <sub>10</sub> Y <sub>11</sub> , In <sub>6</sub> Si <sub>4</sub> Y <sub>11</sub> , Ca <sub>11</sub> Sb <sub>10</sub> , Sb <sub>10</sub> Sr <sub>11</sub> , Ag <sub>2</sub> Lu, Al <sub>2</sub> LaZn <sub>2</sub> , Au <sub>2</sub> Lu, Au <sub>2</sub> Si <sub>2</sub> Th, Au <sub>2</sub> Ge <sub>2</sub> Th, BiLa <sub>2</sub> , Al <sub>4</sub> La, BiN <sub>2</sub> U <sub>2</sub> , Al <sub>2</sub> Ga <sub>2</sub> La, As <sub>2</sub> LaPd <sub>2</sub> , Au <sub>2</sub> LaSi <sub>2</sub> , Ag <sub>2</sub> LaSi <sub>2</sub> , C <sub>2</sub> Lu, Ge <sub>2</sub> Pd <sub>2</sub> U, BiLa <sub>2</sub> O <sub>2</sub> , C <sub>2</sub> Pa, La, AsTeU, I <sub>2</sub> La, Pa, Li <sub>3</sub> O <sub>4</sub> U, Ge <sub>2</sub> LaPd <sub>2</sub> , LaP <sub>2</sub> Pd <sub>2</sub> , MoU <sub>2</sub> , BiN <sub>2</sub> Th <sub>2</sub> , Ge <sub>2</sub> LaPt <sub>2</sub> , LuPb <sub>2</sub> , LaPd <sub>2</sub> Si <sub>2</sub> , Ga <sub>4</sub> LuTi <sub>2</sub> , LuPd <sub>2</sub> Si <sub>2</sub> , GeTeTh, Pd <sub>2</sub> Si <sub>2</sub> U, GeSeTh, LuPt <sub>2</sub> Si <sub>2</sub> , N <sub>2</sub> SbU <sub>2</sub> , N <sub>2</sub> TeU <sub>2</sub> , CB <sub>2</sub> Pt <sub>2</sub> Th, N <sub>2</sub> SbTh <sub>2</sub> , SiTeTh, La <sub>3</sub> N <sub>6</sub> Ta <sub>2</sub> , O <sub>4</sub> Sr <sub>2</sub> U, LaMg <sub>12</sub> , LuO <sub>4</sub> S <sub>5</sub> U <sub>4</sub> , LuZn <sub>12</sub> , LaLi <sub>2</sub> O <sub>7</sub> Ta <sub>2</sub> , LuSi <sub>3</sub> , La <sub>3</sub> N <sub>6</sub> Nb <sub>2</sub> , Ge <sub>10</sub> Lu <sub>11</sub> , AlRe <sub>2</sub> , C <sub>2</sub> Re, ReSi <sub>2</sub> , Cl <sub>10</sub> Cs <sub>3</sub> ORe <sub>2</sub> , ZnZr <sub>2</sub> , |
| <b>140</b> | Pb <sub>2</sub> Pd, AuPb <sub>2</sub> , AlHf <sub>2</sub> , Ga <sub>2</sub> SnTa <sub>5</sub> , GaNb <sub>5</sub> Sn <sub>2</sub> , Mo <sub>5</sub> Si <sub>3</sub> , Nb <sub>20</sub> Si <sub>12</sub> , Si <sub>3</sub> Ta <sub>5</sub> , In <sub>3</sub> Sr <sub>5</sub> , FPb <sub>3</sub> Sr <sub>5</sub> , AlZr <sub>2</sub> , BMo <sub>2</sub> , Sr, AgIn <sub>2</sub> , AuNa <sub>2</sub> , SZr <sub>2</sub> , Ba, BTi <sub>2</sub> , GaHf <sub>2</sub> , GeHf <sub>2</sub> , PdTl <sub>2</sub> , AuTl <sub>2</sub> , BW <sub>2</sub> , GaZr <sub>2</sub> , BTA <sub>2</sub> , GaPt <sub>3</sub> , AgF <sub>3</sub> Rb, Ga <sub>5</sub> Pd, AgCsF <sub>3</sub> , Al <sub>3</sub> Zr <sub>5</sub> , Au <sub>4</sub> In <sub>2</sub> Rb, Au <sub>4</sub> In <sub>2</sub> K, Nb <sub>5</sub> Si <sub>3</sub> , Ge <sub>3</sub> Nb <sub>5</sub> , BGe <sub>2</sub> Nb <sub>5</sub> , Ge <sub>3</sub> Mo <sub>5</sub> , Ga <sub>3</sub> Nb <sub>5</sub> , Ga <sub>3</sub> NbZr <sub>4</sub> , Nb <sub>5</sub> SiSn <sub>2</sub> , Ga <sub>3</sub> Ti <sub>5</sub> , Au <sub>3</sub> Cd <sub>5</sub> , Ge <sub>3</sub> W <sub>5</sub> , Au <sub>3</sub> Ca <sub>5</sub> , Ge <sub>3</sub> Ta <sub>5</sub> , W <sub>5</sub> Zr <sub>3</sub> , Bi <sub>3</sub> In <sub>4</sub> Pb, AuSe <sub>3</sub> Tl <sub>4</sub> , Ca <sub>5</sub> Ga <sub>3</sub> , Ag <sub>3</sub> Ca <sub>5</sub> , Ca <sub>5</sub> Ge <sub>3</sub> , Ca <sub>5</sub> Si <sub>3</sub> , Ca <sub>5</sub> Zn <sub>3</sub> , Ca <sub>5</sub> Pt <sub>3</sub> , Pb <sub>3</sub> Sr <sub>5</sub> , B <sub>2</sub> GeTa <sub>5</sub> ,                                                                                                                                                                                                                                                                                                                                                                                                                                                                                                                                                                                                                                                                                                                                                                                                                                                                                                                                                                                                                                                                                                                                                                                                                                                                                                                                                                                                                                                                                                                                                                                                                                                                                                                                                                                                                                                                                                                                                                                                                                                                                                                                                                                                                                                                                                                                                                                                                                                                                                                                                                                                                                                  |

Part 6 of all the predicted **Case 3**-TSMs:

|            |                                                                                                                                                                                                                                                                                                                                                                                                                                                                                                                                                                                                                                                                                                                                                                                                                                                                                                                                                                                                                                                                                                                                                                                                                                                                                                                                                                                                                                                                                                                                                                                                                                                                                                                                                                                                                                                                                                                                                                                                                                                                                                                                                                                                                                                                                                                                                                                                                                                                                                                                                                                                                                                                                                                                                                                                                                                                                                                                                                                     |
|------------|-------------------------------------------------------------------------------------------------------------------------------------------------------------------------------------------------------------------------------------------------------------------------------------------------------------------------------------------------------------------------------------------------------------------------------------------------------------------------------------------------------------------------------------------------------------------------------------------------------------------------------------------------------------------------------------------------------------------------------------------------------------------------------------------------------------------------------------------------------------------------------------------------------------------------------------------------------------------------------------------------------------------------------------------------------------------------------------------------------------------------------------------------------------------------------------------------------------------------------------------------------------------------------------------------------------------------------------------------------------------------------------------------------------------------------------------------------------------------------------------------------------------------------------------------------------------------------------------------------------------------------------------------------------------------------------------------------------------------------------------------------------------------------------------------------------------------------------------------------------------------------------------------------------------------------------------------------------------------------------------------------------------------------------------------------------------------------------------------------------------------------------------------------------------------------------------------------------------------------------------------------------------------------------------------------------------------------------------------------------------------------------------------------------------------------------------------------------------------------------------------------------------------------------------------------------------------------------------------------------------------------------------------------------------------------------------------------------------------------------------------------------------------------------------------------------------------------------------------------------------------------------------------------------------------------------------------------------------------------------|
| <b>140</b> | Te <sub>3</sub> Tl <sub>5</sub> , TeTl, Si <sub>3</sub> W <sub>5</sub> , Sr <sub>5</sub> Tl <sub>3</sub> , Ba <sub>5</sub> Pb <sub>3</sub> , Ba <sub>11</sub> In <sub>6</sub> O <sub>3</sub> , GeTh <sub>2</sub> , InTh <sub>2</sub> , AuTh <sub>2</sub> , AlTh <sub>2</sub> , PdTh <sub>2</sub> , Th <sub>2</sub> Zn, GaTh <sub>2</sub> , AgTh <sub>2</sub> , HgTh <sub>2</sub> , Th <sub>2</sub> Tl, ClGa <sub>4</sub> La <sub>3</sub> , Ge <sub>2</sub> La <sub>5</sub> Si, S <sub>5</sub> U <sub>3</sub> , La <sub>5</sub> Si <sub>3</sub> , Lu <sub>5</sub> Pd <sub>2</sub> Sb, Ga <sub>3</sub> La <sub>5</sub> , La <sub>5</sub> SnZn <sub>2</sub> , La <sub>5</sub> Sn <sub>3</sub> , AuF <sub>11</sub> U <sub>2</sub> , Cl <sub>4</sub> Ga <sub>5</sub> La <sub>10</sub> , Br <sub>4</sub> Ga <sub>5</sub> La <sub>10</sub> , Al <sub>5</sub> Br <sub>4</sub> La <sub>10</sub> , Re <sub>5</sub> Si <sub>3</sub> , Al <sub>4</sub> Br <sub>4</sub> La <sub>5</sub> , La <sub>5</sub> Tl <sub>3</sub> , BeTa <sub>2</sub> , Cs <sub>9</sub> InO <sub>4</sub> ,                                                                                                                                                                                                                                                                                                                                                                                                                                                                                                                                                                                                                                                                                                                                                                                                                                                                                                                                                                                                                                                                                                                                                                                                                                                                                                                                                                                                                                                                                                                                                                                                                                                                                                                                                                                                                                                                                                               |
| <b>141</b> | K, Cs, Mo <sub>2</sub> N, Ge <sub>2</sub> Y, LiSn, In <sub>2</sub> NSr <sub>4</sub> , AuLi <sub>2</sub> Sn <sub>2</sub> , Ca <sub>4</sub> In <sub>2</sub> N, O <sub>5</sub> Ta <sub>2</sub> , CCl <sub>13</sub> Cs <sub>4</sub> Sc <sub>6</sub> , Rb, Sr, Si <sub>2</sub> Y, LiO <sub>2</sub> Ti, NTi <sub>2</sub> , GeLi, AgLi <sub>2</sub> Sn <sub>2</sub> , LaSi <sub>2</sub> , PbTh, LiN <sub>2</sub> U, Cl <sub>4</sub> U, Ge <sub>2</sub> La, LaMgSi <sub>2</sub> , Cl <sub>4</sub> Pa, Br <sub>4</sub> Pa, O <sub>4</sub> SiU, LaZn <sub>11</sub> , La <sub>3</sub> Zn <sub>22</sub> , B <sub>4</sub> Re <sub>4</sub> , Ag <sub>6</sub> GeO <sub>8</sub> S,                                                                                                                                                                                                                                                                                                                                                                                                                                                                                                                                                                                                                                                                                                                                                                                                                                                                                                                                                                                                                                                                                                                                                                                                                                                                                                                                                                                                                                                                                                                                                                                                                                                                                                                                                                                                                                                                                                                                                                                                                                                                                                                                                                                                                                                                                                                  |
| <b>142</b> | Pd <sub>16</sub> Sn <sub>32</sub> , PdSn <sub>2</sub> ,                                                                                                                                                                                                                                                                                                                                                                                                                                                                                                                                                                                                                                                                                                                                                                                                                                                                                                                                                                                                                                                                                                                                                                                                                                                                                                                                                                                                                                                                                                                                                                                                                                                                                                                                                                                                                                                                                                                                                                                                                                                                                                                                                                                                                                                                                                                                                                                                                                                                                                                                                                                                                                                                                                                                                                                                                                                                                                                             |
| <b>143</b> | BiTe, AlCaSi,                                                                                                                                                                                                                                                                                                                                                                                                                                                                                                                                                                                                                                                                                                                                                                                                                                                                                                                                                                                                                                                                                                                                                                                                                                                                                                                                                                                                                                                                                                                                                                                                                                                                                                                                                                                                                                                                                                                                                                                                                                                                                                                                                                                                                                                                                                                                                                                                                                                                                                                                                                                                                                                                                                                                                                                                                                                                                                                                                                       |
| <b>146</b> | CBr <sub>12</sub> Sc <sub>7</sub> , Au <sub>5</sub> Sn, P <sub>3</sub> Pd <sub>7</sub> , Cl <sub>12</sub> Sc <sub>7</sub> , Cl <sub>6</sub> LiW,                                                                                                                                                                                                                                                                                                                                                                                                                                                                                                                                                                                                                                                                                                                                                                                                                                                                                                                                                                                                                                                                                                                                                                                                                                                                                                                                                                                                                                                                                                                                                                                                                                                                                                                                                                                                                                                                                                                                                                                                                                                                                                                                                                                                                                                                                                                                                                                                                                                                                                                                                                                                                                                                                                                                                                                                                                    |
| <b>147</b> | Cl <sub>18</sub> Cs <sub>2</sub> W <sub>6</sub> , NW <sub>2</sub> , Au <sub>10</sub> In <sub>3</sub> , Br <sub>2</sub> Hg <sub>3</sub> Se <sub>3</sub> Zn,                                                                                                                                                                                                                                                                                                                                                                                                                                                                                                                                                                                                                                                                                                                                                                                                                                                                                                                                                                                                                                                                                                                                                                                                                                                                                                                                                                                                                                                                                                                                                                                                                                                                                                                                                                                                                                                                                                                                                                                                                                                                                                                                                                                                                                                                                                                                                                                                                                                                                                                                                                                                                                                                                                                                                                                                                          |
| <b>148</b> | F <sub>6</sub> PdPt, CsMo <sub>6</sub> Se <sub>7</sub> , Cl <sub>12</sub> Zr <sub>6</sub> , BCl <sub>12</sub> Sc <sub>7</sub> , Cl <sub>3</sub> Ti, F <sub>6</sub> PdZr, F <sub>6</sub> LiPt, Br <sub>3</sub> Ti, AgBiO <sub>3</sub> , Pd <sub>4</sub> Zr <sub>3</sub> , Au <sub>4</sub> Ca <sub>3</sub> , Mo <sub>6</sub> Te <sub>8</sub> , Mo <sub>6</sub> Se <sub>8</sub> Y, HgMo <sub>6</sub> S <sub>8</sub> , CaMo <sub>6</sub> S <sub>8</sub> , Ca <sub>3</sub> Pd <sub>2</sub> , AgMo <sub>6</sub> Se <sub>8</sub> , Mo <sub>6</sub> S <sub>8</sub> Y, BiMo <sub>6</sub> S <sub>8</sub> , InMo <sub>6</sub> Se <sub>8</sub> , BaMo <sub>6</sub> S <sub>8</sub> , AgMo <sub>6</sub> S <sub>8</sub> , KO <sub>3</sub> Sb, Mo <sub>6</sub> NbS <sub>8</sub> , Mo <sub>6</sub> PbS <sub>8</sub> , InMo <sub>6</sub> S <sub>8</sub> , Mo <sub>6</sub> S <sub>8</sub> Sr, Mo <sub>6</sub> S <sub>8</sub> Sn, Ca <sub>3</sub> Pt <sub>2</sub> , LiMo <sub>6</sub> Se <sub>8</sub> , Mo <sub>6</sub> S <sub>8</sub> Sb, Cl <sub>12</sub> Sc <sub>7</sub> , Mo <sub>6</sub> Se <sub>8</sub> Tl, Mo <sub>6</sub> Se <sub>8</sub> Sn, Mo <sub>6</sub> PbSe <sub>8</sub> , Mo <sub>6</sub> S <sub>8</sub> Tl, Pt <sub>2</sub> Sr <sub>3</sub> , Ag <sub>2</sub> Sr <sub>3</sub> , Au <sub>2</sub> Ba <sub>3</sub> , AlPd, Br <sub>12</sub> Zr <sub>6</sub> , Pd <sub>4</sub> Y <sub>3</sub> , Pd <sub>2</sub> Y <sub>3</sub> , I <sub>12</sub> Zr <sub>6</sub> , P <sub>2</sub> Pd <sub>15</sub> , Pd <sub>20</sub> Sb <sub>7</sub> , Pd <sub>20</sub> Te <sub>7</sub> , NaO <sub>13</sub> Ti <sub>8</sub> , Cl <sub>18</sub> W <sub>6</sub> , Mo <sub>12</sub> Rb <sub>2</sub> Se <sub>14</sub> , Cl <sub>18</sub> K <sub>2</sub> Zr <sub>7</sub> , Bi <sub>12</sub> Zr <sub>6</sub> , Cs <sub>2</sub> Mo <sub>12</sub> Se <sub>14</sub> , Mo <sub>18</sub> Rb <sub>4</sub> Se <sub>20</sub> , CsF <sub>6</sub> U, I <sub>6</sub> Na <sub>2</sub> U, Lu <sub>3</sub> Pd <sub>4</sub> , LuMo <sub>6</sub> S <sub>8</sub> , La <sub>3</sub> Pd <sub>4</sub> , Mo <sub>6</sub> S <sub>8</sub> U, LuMo <sub>6</sub> Se <sub>8</sub> , Pd <sub>4</sub> Th <sub>3</sub> , LaMo <sub>6</sub> S <sub>8</sub> , Lu <sub>3</sub> Pt <sub>4</sub> , La <sub>3</sub> Pt <sub>4</sub> , La <sub>3</sub> Pt <sub>2</sub> , LaMo <sub>6</sub> Se <sub>8</sub> , Cl <sub>18</sub> LuNb <sub>6</sub> , CCl <sub>18</sub> Cs <sub>2</sub> Lu <sub>7</sub> , Ga <sub>40</sub> LaMo <sub>8</sub> , Cl <sub>6</sub> Re, Ag <sub>2</sub> Cl <sub>6</sub> Re, CsF <sub>6</sub> Re, O <sub>12</sub> ReSc <sub>6</sub> , Ba <sub>6</sub> N <sub>6</sub> ORe <sub>2</sub> , P <sub>13</sub> Re <sub>6</sub> , P <sub>26</sub> Re <sub>12</sub> , Cl <sub>12</sub> ReTe <sub>2</sub> , Br <sub>2</sub> Mo <sub>6</sub> S <sub>6</sub> , Ag <sub>2</sub> Ba <sub>3</sub> , Au <sub>2</sub> Sr <sub>3</sub> , Cs <sub>2</sub> Mo <sub>12</sub> Te <sub>14</sub> , I <sub>6</sub> MoO <sub>18</sub> Rb <sub>2</sub> , |
| <b>149</b> | Cl <sub>3</sub> Ti,                                                                                                                                                                                                                                                                                                                                                                                                                                                                                                                                                                                                                                                                                                                                                                                                                                                                                                                                                                                                                                                                                                                                                                                                                                                                                                                                                                                                                                                                                                                                                                                                                                                                                                                                                                                                                                                                                                                                                                                                                                                                                                                                                                                                                                                                                                                                                                                                                                                                                                                                                                                                                                                                                                                                                                                                                                                                                                                                                                 |
| <b>150</b> | F <sub>3</sub> Pd,                                                                                                                                                                                                                                                                                                                                                                                                                                                                                                                                                                                                                                                                                                                                                                                                                                                                                                                                                                                                                                                                                                                                                                                                                                                                                                                                                                                                                                                                                                                                                                                                                                                                                                                                                                                                                                                                                                                                                                                                                                                                                                                                                                                                                                                                                                                                                                                                                                                                                                                                                                                                                                                                                                                                                                                                                                                                                                                                                                  |
| <b>152</b> | Te,                                                                                                                                                                                                                                                                                                                                                                                                                                                                                                                                                                                                                                                                                                                                                                                                                                                                                                                                                                                                                                                                                                                                                                                                                                                                                                                                                                                                                                                                                                                                                                                                                                                                                                                                                                                                                                                                                                                                                                                                                                                                                                                                                                                                                                                                                                                                                                                                                                                                                                                                                                                                                                                                                                                                                                                                                                                                                                                                                                                 |
| <b>154</b> | HgSe,                                                                                                                                                                                                                                                                                                                                                                                                                                                                                                                                                                                                                                                                                                                                                                                                                                                                                                                                                                                                                                                                                                                                                                                                                                                                                                                                                                                                                                                                                                                                                                                                                                                                                                                                                                                                                                                                                                                                                                                                                                                                                                                                                                                                                                                                                                                                                                                                                                                                                                                                                                                                                                                                                                                                                                                                                                                                                                                                                                               |
| <b>155</b> | OZr <sub>3</sub> , Li <sub>4</sub> Pt <sub>3</sub> Si, HgMg <sub>3</sub> , Ag <sub>3</sub> BO <sub>3</sub> ,                                                                                                                                                                                                                                                                                                                                                                                                                                                                                                                                                                                                                                                                                                                                                                                                                                                                                                                                                                                                                                                                                                                                                                                                                                                                                                                                                                                                                                                                                                                                                                                                                                                                                                                                                                                                                                                                                                                                                                                                                                                                                                                                                                                                                                                                                                                                                                                                                                                                                                                                                                                                                                                                                                                                                                                                                                                                        |
| <b>156</b> | CB <sub>2</sub> N, C <sub>7</sub> B, CdS <sub>2</sub> Tl, CaLiSn, Cl <sub>6</sub> K <sub>2</sub> NaU,                                                                                                                                                                                                                                                                                                                                                                                                                                                                                                                                                                                                                                                                                                                                                                                                                                                                                                                                                                                                                                                                                                                                                                                                                                                                                                                                                                                                                                                                                                                                                                                                                                                                                                                                                                                                                                                                                                                                                                                                                                                                                                                                                                                                                                                                                                                                                                                                                                                                                                                                                                                                                                                                                                                                                                                                                                                                               |
| <b>157</b> | Ag <sub>5</sub> O <sub>6</sub> Pb <sub>2</sub> , AuCd, Al <sub>40</sub> Ba <sub>21</sub> , CsNO <sub>3</sub> ,                                                                                                                                                                                                                                                                                                                                                                                                                                                                                                                                                                                                                                                                                                                                                                                                                                                                                                                                                                                                                                                                                                                                                                                                                                                                                                                                                                                                                                                                                                                                                                                                                                                                                                                                                                                                                                                                                                                                                                                                                                                                                                                                                                                                                                                                                                                                                                                                                                                                                                                                                                                                                                                                                                                                                                                                                                                                      |
| <b>158</b> | Cl <sub>15</sub> HgS <sub>3</sub> Se <sub>3</sub> Zn,                                                                                                                                                                                                                                                                                                                                                                                                                                                                                                                                                                                                                                                                                                                                                                                                                                                                                                                                                                                                                                                                                                                                                                                                                                                                                                                                                                                                                                                                                                                                                                                                                                                                                                                                                                                                                                                                                                                                                                                                                                                                                                                                                                                                                                                                                                                                                                                                                                                                                                                                                                                                                                                                                                                                                                                                                                                                                                                               |
| <b>159</b> | C <sub>5</sub> Al <sub>3</sub> Zr <sub>2</sub> , C <sub>5</sub> Al <sub>3</sub> Hf <sub>2</sub> ,                                                                                                                                                                                                                                                                                                                                                                                                                                                                                                                                                                                                                                                                                                                                                                                                                                                                                                                                                                                                                                                                                                                                                                                                                                                                                                                                                                                                                                                                                                                                                                                                                                                                                                                                                                                                                                                                                                                                                                                                                                                                                                                                                                                                                                                                                                                                                                                                                                                                                                                                                                                                                                                                                                                                                                                                                                                                                   |
| <b>160</b> | AsSe <sub>2</sub> , AgTe <sub>3</sub> , BiO, CB <sub>2</sub> N, As <sub>3</sub> Sn <sub>4</sub> , HgS <sub>2</sub> Ta, B <sub>4</sub> Li <sub>5</sub> , Br <sub>2</sub> Ca <sub>3</sub> Si, KS <sub>2</sub> Sn, NbSe <sub>2</sub> , KS <sub>2</sub> Ti, In <sub>2</sub> S <sub>4</sub> Zn, AlMo <sub>4</sub> S <sub>8</sub> , C <sub>3</sub> Al <sub>8</sub> N <sub>4</sub> , GaMo <sub>4</sub> S <sub>8</sub> , GaMo <sub>4</sub> Se <sub>8</sub> , C <sub>7</sub> B, Cs <sub>2</sub> O <sub>12</sub> U <sub>4</sub> ,                                                                                                                                                                                                                                                                                                                                                                                                                                                                                                                                                                                                                                                                                                                                                                                                                                                                                                                                                                                                                                                                                                                                                                                                                                                                                                                                                                                                                                                                                                                                                                                                                                                                                                                                                                                                                                                                                                                                                                                                                                                                                                                                                                                                                                                                                                                                                                                                                                                             |
| <b>161</b> | Ge <sub>3</sub> Li <sub>8</sub> Zn <sub>2</sub> , Ge <sub>13</sub> Pt <sub>4</sub> Y <sub>3</sub> , LiO <sub>3</sub> U, LiO <sub>3</sub> Re, Li <sub>2</sub> O <sub>3</sub> Re,                                                                                                                                                                                                                                                                                                                                                                                                                                                                                                                                                                                                                                                                                                                                                                                                                                                                                                                                                                                                                                                                                                                                                                                                                                                                                                                                                                                                                                                                                                                                                                                                                                                                                                                                                                                                                                                                                                                                                                                                                                                                                                                                                                                                                                                                                                                                                                                                                                                                                                                                                                                                                                                                                                                                                                                                     |

Part 7 of all the predicted **Case 3**-TSMs:

|            |                                                                                                                                                                                                                                                                                                                                                                                                                                                                                                                                                                                                                                                                                                                                                                                                                                                                                                                                                                                                                                                                                                                                                                                                                                                                                                                                                                                                                                                                                                                                                                                                                                                                                                                                                                                                                                                                                                                                                                                                                                                                                                                                                                                                                                                                                                                                                                                                                                                                                                                                                                         |
|------------|-------------------------------------------------------------------------------------------------------------------------------------------------------------------------------------------------------------------------------------------------------------------------------------------------------------------------------------------------------------------------------------------------------------------------------------------------------------------------------------------------------------------------------------------------------------------------------------------------------------------------------------------------------------------------------------------------------------------------------------------------------------------------------------------------------------------------------------------------------------------------------------------------------------------------------------------------------------------------------------------------------------------------------------------------------------------------------------------------------------------------------------------------------------------------------------------------------------------------------------------------------------------------------------------------------------------------------------------------------------------------------------------------------------------------------------------------------------------------------------------------------------------------------------------------------------------------------------------------------------------------------------------------------------------------------------------------------------------------------------------------------------------------------------------------------------------------------------------------------------------------------------------------------------------------------------------------------------------------------------------------------------------------------------------------------------------------------------------------------------------------------------------------------------------------------------------------------------------------------------------------------------------------------------------------------------------------------------------------------------------------------------------------------------------------------------------------------------------------------------------------------------------------------------------------------------------------|
| <b>162</b> | F <sub>6</sub> Li <sub>2</sub> Nb, NNb <sub>2</sub> , As <sub>2</sub> O <sub>6</sub> Pd, NTa <sub>2</sub> , F <sub>6</sub> Hg <sub>3</sub> Nb, CW <sub>2</sub> , Ag <sub>5</sub> O <sub>6</sub> Pb <sub>2</sub> , MoN, AgSe <sub>2</sub> Tl,                                                                                                                                                                                                                                                                                                                                                                                                                                                                                                                                                                                                                                                                                                                                                                                                                                                                                                                                                                                                                                                                                                                                                                                                                                                                                                                                                                                                                                                                                                                                                                                                                                                                                                                                                                                                                                                                                                                                                                                                                                                                                                                                                                                                                                                                                                                            |
| <b>163</b> | OTi <sub>3</sub> , Cl <sub>3</sub> Ti, In <sub>2</sub> Pt <sub>3</sub> , F <sub>6</sub> GaLiPd, AlF <sub>6</sub> LiPd, Cl <sub>6</sub> MoNa <sub>3</sub> , KMo <sub>12</sub> S <sub>14</sub> , Cl <sub>18</sub> CsPbTa <sub>6</sub> ,                                                                                                                                                                                                                                                                                                                                                                                                                                                                                                                                                                                                                                                                                                                                                                                                                                                                                                                                                                                                                                                                                                                                                                                                                                                                                                                                                                                                                                                                                                                                                                                                                                                                                                                                                                                                                                                                                                                                                                                                                                                                                                                                                                                                                                                                                                                                   |
| <b>164</b> | NbS <sub>2</sub> , O <sub>2</sub> PZr <sub>3</sub> , CdInS <sub>2</sub> , Ag <sub>2</sub> F, Cl <sub>2</sub> Ti, AuTe <sub>2</sub> , AlCl <sub>3</sub> , CaHg <sub>2</sub> , CSc <sub>2</sub> , Cd <sub>2</sub> Y, CdSe <sub>2</sub> Tl, CdTe <sub>2</sub> Tl, Cl <sub>2</sub> NSc <sub>2</sub> , Au <sub>3</sub> In <sub>2</sub> , Al <sub>2</sub> Ge <sub>2</sub> Y, CdS <sub>2</sub> Tl, CaSb <sub>2</sub> Zn <sub>2</sub> , Al <sub>3</sub> Pd <sub>2</sub> , Al <sub>3</sub> Pt <sub>2</sub> , Al <sub>2</sub> Si <sub>2</sub> Y, Cs <sub>2</sub> F <sub>6</sub> Nb, Al <sub>13</sub> Ba <sub>7</sub> , Cs <sub>2</sub> F <sub>6</sub> NaTi, N <sub>2</sub> Zr, HfTe <sub>2</sub> , LiS <sub>2</sub> Ti, NbSe <sub>2</sub> , LiS <sub>2</sub> Sn, NbTe <sub>2</sub> , OTi <sub>2</sub> , LiSe <sub>2</sub> Zr, LiTe <sub>2</sub> Ti, Ga <sub>3</sub> Pt <sub>2</sub> , In <sub>3</sub> Pd <sub>2</sub> , In <sub>3</sub> Pt <sub>2</sub> , Se <sub>2</sub> Ti, S <sub>2</sub> Ta, Se <sub>2</sub> Ta, O <sub>2</sub> PTi <sub>3</sub> , Sb <sub>2</sub> SrZn <sub>2</sub> , In <sub>4</sub> Li <sub>5</sub> , F <sub>6</sub> NbRb <sub>2</sub> , Hg <sub>7</sub> K <sub>2</sub> , Hg <sub>7</sub> Rb <sub>2</sub> , Li <sub>13</sub> Sn <sub>5</sub> , MoN, Pd <sub>13</sub> Tl <sub>9</sub> , Mo <sub>6</sub> O <sub>17</sub> Tl, Ge <sub>7</sub> Nb <sub>10</sub> , Au <sub>2</sub> U, Cd <sub>2</sub> Lu, Al <sub>2</sub> Ge <sub>2</sub> La, Al <sub>2</sub> Ge <sub>2</sub> Lu, Cd <sub>2</sub> La, AsN <sub>2</sub> U <sub>2</sub> , Br <sub>2</sub> La <sub>2</sub> P, N <sub>2</sub> PU <sub>2</sub> , Hg <sub>2</sub> La, N <sub>2</sub> SeU <sub>2</sub> , N <sub>3</sub> Th <sub>2</sub> , N <sub>3</sub> U <sub>2</sub> , I <sub>2</sub> La <sub>2</sub> P, ReTi <sub>2</sub> , F <sub>6</sub> K <sub>2</sub> Re, CdGaInS <sub>4</sub> ,                                                                                                                                                                                                                                                                                                                                                                                                                                                                                                                                                                                                                                                                                                               |
| <b>165</b> | Ba, AsLi <sub>3</sub> , AuMg <sub>3</sub> , La <sub>5</sub> O <sub>15</sub> Ti <sub>4</sub> , F <sub>30</sub> GaNa <sub>3</sub> U <sub>6</sub> ,                                                                                                                                                                                                                                                                                                                                                                                                                                                                                                                                                                                                                                                                                                                                                                                                                                                                                                                                                                                                                                                                                                                                                                                                                                                                                                                                                                                                                                                                                                                                                                                                                                                                                                                                                                                                                                                                                                                                                                                                                                                                                                                                                                                                                                                                                                                                                                                                                        |
| <b>166</b> | HgIn, Se <sub>2</sub> Ta, PTe <sub>2</sub> Ti <sub>2</sub> , Au <sub>7</sub> Cs <sub>4</sub> Sn <sub>2</sub> , Al <sub>2</sub> Li <sub>3</sub> , Ba <sub>2</sub> N, LiPb, AgInSe <sub>2</sub> , B <sub>3</sub> Mo, HgNa <sub>3</sub> , Li, Ga <sub>2</sub> Li <sub>3</sub> , LiMoO <sub>2</sub> , In <sub>2</sub> Li <sub>3</sub> , F <sub>3</sub> Ti, LiS <sub>2</sub> Sn, Ge <sub>2</sub> Li <sub>4</sub> Zr, In <sub>2</sub> Se <sub>3</sub> , Se, Ca <sub>2</sub> N, Po, Te, GeTe, S, NbS <sub>2</sub> , GeP <sub>3</sub> , MoNaO <sub>2</sub> , NSr <sub>2</sub> , LiS <sub>2</sub> Ti, As <sub>2</sub> NaSn <sub>2</sub> , In <sub>3</sub> Te <sub>4</sub> , KS <sub>2</sub> Ti, Na, Cd <sub>4</sub> KP <sub>3</sub> , NaS <sub>2</sub> Ti, B <sub>5</sub> Mo <sub>2</sub> , KS <sub>2</sub> Sn, KS <sub>2</sub> Zr, NaS <sub>2</sub> Sn, RbS <sub>2</sub> Sn, Li <sub>5</sub> Tl <sub>2</sub> , Li <sub>5</sub> Sn <sub>2</sub> , Y <sub>2</sub> Zn <sub>17</sub> , B <sub>5</sub> W <sub>2</sub> , Na <sub>5</sub> Pb <sub>2</sub> , PTe <sub>2</sub> Zr <sub>2</sub> , Be <sub>3</sub> Ti, Be <sub>3</sub> Nb, As <sub>3</sub> Sn <sub>4</sub> , Na <sub>5</sub> Sn <sub>2</sub> , As <sub>3</sub> NaZn <sub>4</sub> , Be <sub>3</sub> Ta, P <sub>3</sub> Sn <sub>4</sub> , Pb <sub>2</sub> Pd <sub>3</sub> Se <sub>2</sub> , Pd <sub>3</sub> Se <sub>2</sub> Tl <sub>2</sub> , Bi <sub>3</sub> Se <sub>4</sub> , P <sub>3</sub> Sn, Pb <sub>2</sub> Pd <sub>3</sub> S <sub>2</sub> , Be <sub>17</sub> Nb <sub>2</sub> , Ga <sub>7</sub> Rb, Be <sub>17</sub> Zr <sub>2</sub> , Be <sub>17</sub> Ti <sub>2</sub> , Bi <sub>4</sub> Te <sub>3</sub> , Al <sub>3</sub> Y, CsGa <sub>7</sub> , Be <sub>17</sub> Ta <sub>2</sub> , Be <sub>17</sub> Hf <sub>2</sub> , Sn <sub>3</sub> Sr, SbSn, Ag <sub>2</sub> Al <sub>7</sub> Ca <sub>3</sub> , B <sub>13</sub> N <sub>2</sub> , C <sub>2</sub> B <sub>12</sub> Be, C <sub>2</sub> B <sub>13</sub> , C <sub>3</sub> Al <sub>8</sub> N <sub>4</sub> , Al <sub>9</sub> Sr <sub>5</sub> , BaPb <sub>3</sub> , Au <sub>7</sub> Rb <sub>4</sub> Sn <sub>2</sub> , Au <sub>7</sub> Ge <sub>2</sub> K <sub>4</sub> , Li <sub>5</sub> Na <sub>2</sub> Sn <sub>4</sub> , Cs <sub>4</sub> OTl <sub>2</sub> , CClLa <sub>2</sub> , Lu, NU, LiO <sub>3</sub> U, Ge <sub>3</sub> La, Th <sub>2</sub> Zn <sub>17</sub> , PU, CB <sub>2</sub> U, La <sub>2</sub> Zn <sub>17</sub> , Lu <sub>2</sub> Zn <sub>17</sub> , U <sub>2</sub> Zn <sub>17</sub> , O <sub>6</sub> PbRe <sub>2</sub> , Ag <sub>4</sub> Sb <sub>2</sub> Sr, |
| <b>167</b> | Au <sub>6</sub> Sr <sub>2</sub> Zn <sub>3</sub> , HgO <sub>3</sub> Sn, NPd <sub>3</sub> , F <sub>3</sub> Ti, F <sub>3</sub> Pd, F <sub>3</sub> Mo, Al <sub>5</sub> Mo, OZr <sub>3</sub> , O <sub>3</sub> Ti <sub>2</sub> , BO <sub>3</sub> Ti, Au <sub>6</sub> Ga <sub>3</sub> Sr <sub>2</sub> , Cd <sub>6</sub> Sb <sub>5</sub> , Ga <sub>5</sub> NSr <sub>6</sub> , Hg <sub>3</sub> Na <sub>8</sub> , Al <sub>3</sub> Au <sub>8</sub> , Ba <sub>6</sub> Ga <sub>5</sub> N, Mo <sub>9</sub> S <sub>11</sub> Tl <sub>2</sub> , Ba <sub>6</sub> In <sub>5</sub> N, K <sub>8</sub> Tl <sub>11</sub> , K <sub>2</sub> Mo <sub>9</sub> S <sub>11</sub> , Mo <sub>9</sub> Rb <sub>2</sub> S <sub>11</sub> , In <sub>11</sub> K <sub>8</sub> , Rb <sub>8</sub> Tl <sub>11</sub> , In <sub>11</sub> Rb <sub>8</sub> , Mo <sub>15</sub> Na <sub>2</sub> Se <sub>19</sub> , Cs <sub>8</sub> Ga <sub>11</sub> , Ba <sub>14</sub> CaN <sub>6</sub> Na <sub>7</sub> , Ba <sub>2</sub> Mo <sub>15</sub> Se <sub>19</sub> , Mg <sub>21</sub> Zn <sub>25</sub> , Mo <sub>15</sub> Pb <sub>2</sub> Se <sub>19</sub> , Mo <sub>15</sub> Rb <sub>2</sub> S <sub>19</sub> , Mo <sub>15</sub> Se <sub>19</sub> Sn <sub>2</sub> , Li <sub>2</sub> Mo <sub>15</sub> Se <sub>19</sub> , K <sub>2</sub> Mo <sub>15</sub> Se <sub>19</sub> , In <sub>2</sub> Mo <sub>15</sub> Se <sub>19</sub> , K <sub>2</sub> Mo <sub>15</sub> S <sub>19</sub> , Cs <sub>2</sub> Mo <sub>15</sub> S <sub>19</sub> , Mo <sub>21</sub> Rb <sub>4</sub> S <sub>25</sub> , Ca <sub>6</sub> Hf <sub>19</sub> O <sub>44</sub> ,                                                                                                                                                                                                                                                                                                                                                                                                                                                                                                                                                                                                                                                                                                                                                                                                                                                                                                                                                                                      |
| <b>173</b> | Al <sub>5</sub> Mo, Al <sub>5</sub> W, AlCaSi, CaO <sub>11</sub> Ta <sub>4</sub> , Cl <sub>3</sub> KTi, I <sub>3</sub> KTi, BeGaLa <sub>3</sub> S <sub>7</sub> , AlLa <sub>3</sub> S <sub>7</sub> Ti, BeInLa <sub>3</sub> S <sub>7</sub> , BeLa <sub>3</sub> LuS <sub>7</sub> ,                                                                                                                                                                                                                                                                                                                                                                                                                                                                                                                                                                                                                                                                                                                                                                                                                                                                                                                                                                                                                                                                                                                                                                                                                                                                                                                                                                                                                                                                                                                                                                                                                                                                                                                                                                                                                                                                                                                                                                                                                                                                                                                                                                                                                                                                                         |
| <b>174</b> | Al <sub>3</sub> Zr <sub>4</sub> , NTa, As <sub>7</sub> Nb <sub>9</sub> Pd, Te <sub>12</sub> U <sub>7</sub> , O <sub>2</sub> Se <sub>12</sub> U <sub>7</sub> , B <sub>3</sub> BrLa <sub>2</sub> ,                                                                                                                                                                                                                                                                                                                                                                                                                                                                                                                                                                                                                                                                                                                                                                                                                                                                                                                                                                                                                                                                                                                                                                                                                                                                                                                                                                                                                                                                                                                                                                                                                                                                                                                                                                                                                                                                                                                                                                                                                                                                                                                                                                                                                                                                                                                                                                        |
| <b>176</b> | Mo <sub>15</sub> S <sub>19</sub> Sn <sub>2</sub> , NbSe <sub>2</sub> , BaMo <sub>3</sub> Te <sub>3</sub> , CsMo <sub>3</sub> Te <sub>3</sub> , CsMo <sub>3</sub> S <sub>3</sub> , KMo <sub>3</sub> Se <sub>3</sub> , Mo <sub>3</sub> RbS <sub>3</sub> , Mo <sub>3</sub> NaTe <sub>3</sub> , Mo <sub>3</sub> RbSe <sub>3</sub> , LiMo <sub>3</sub> Se <sub>3</sub> , Nb <sub>3</sub> S <sub>4</sub> , BaMo <sub>3</sub> Se <sub>3</sub> , AsNb <sub>3</sub> Te <sub>3</sub> , InMo <sub>3</sub> Te <sub>3</sub> , KMo <sub>3</sub> Te <sub>3</sub> , Mo <sub>3</sub> RbTe <sub>3</sub> , Nb <sub>3</sub> Te <sub>4</sub> , Nb <sub>3</sub> Se <sub>4</sub> , AgMo <sub>3</sub> Se <sub>3</sub> , InMo <sub>3</sub> Se <sub>3</sub> , CsMo <sub>3</sub> Se <sub>3</sub> , Mo <sub>6</sub> Se <sub>6</sub> Tl <sub>2</sub> , Mo <sub>3</sub> NaSe <sub>3</sub> , KMo <sub>3</sub> S <sub>3</sub> , Se <sub>4</sub> Ti <sub>3</sub> , Mo <sub>3</sub> Se <sub>3</sub> Tl, Au <sub>10</sub> In <sub>3</sub> , AgNb <sub>3</sub> Te <sub>4</sub> , Au <sub>10</sub> Ga <sub>16</sub> Na <sub>5</sub> , AgCd <sub>3</sub> F <sub>20</sub> Hf <sub>3</sub> , AgCd <sub>3</sub> F <sub>20</sub> Zr <sub>3</sub> , K <sub>3</sub> Mg <sub>18</sub> Sn <sub>11</sub> , Mo <sub>15</sub> Se <sub>19</sub> , K <sub>3</sub> Mg <sub>18</sub> Pb <sub>11</sub> , Mo <sub>15</sub> Rb <sub>3</sub> Se <sub>17</sub> , Mo <sub>15</sub> Pb <sub>2</sub> Se <sub>19</sub> , Li <sub>5</sub> Mo <sub>15</sub> S <sub>19</sub> , Cs <sub>3</sub> Mo <sub>15</sub> Se <sub>17</sub> , Cs <sub>3</sub> Mo <sub>15</sub> Te <sub>17</sub> , CCl <sub>18</sub> LiW <sub>6</sub> , CCl <sub>18</sub> NaW <sub>6</sub> , Mo <sub>27</sub> Rb <sub>5</sub> Se <sub>31</sub> , Cl <sub>3</sub> U, Br <sub>3</sub> U,                                                                                                                                                                                                                                                                                                                                                                                                                                                                                                                                                                                                                                                                                                                                                                               |
| <b>180</b> | Si <sub>2</sub> Ta, MoSn <sub>2</sub> , BLuPt <sub>2</sub> ,                                                                                                                                                                                                                                                                                                                                                                                                                                                                                                                                                                                                                                                                                                                                                                                                                                                                                                                                                                                                                                                                                                                                                                                                                                                                                                                                                                                                                                                                                                                                                                                                                                                                                                                                                                                                                                                                                                                                                                                                                                                                                                                                                                                                                                                                                                                                                                                                                                                                                                            |
| <b>181</b> | Si <sub>2</sub> Ta,                                                                                                                                                                                                                                                                                                                                                                                                                                                                                                                                                                                                                                                                                                                                                                                                                                                                                                                                                                                                                                                                                                                                                                                                                                                                                                                                                                                                                                                                                                                                                                                                                                                                                                                                                                                                                                                                                                                                                                                                                                                                                                                                                                                                                                                                                                                                                                                                                                                                                                                                                     |

Part 8 of all the predicted **Case 3**-TSMs:

|            |                                                                                                                                                                                                                                                                                                                                                                                                                                                                                                                                                                                                                                                                                                                                                                                                                                                                                                                                                                                                                                                                                                                                                                                                                                                                                                                                                                                                                                                                                            |
|------------|--------------------------------------------------------------------------------------------------------------------------------------------------------------------------------------------------------------------------------------------------------------------------------------------------------------------------------------------------------------------------------------------------------------------------------------------------------------------------------------------------------------------------------------------------------------------------------------------------------------------------------------------------------------------------------------------------------------------------------------------------------------------------------------------------------------------------------------------------------------------------------------------------------------------------------------------------------------------------------------------------------------------------------------------------------------------------------------------------------------------------------------------------------------------------------------------------------------------------------------------------------------------------------------------------------------------------------------------------------------------------------------------------------------------------------------------------------------------------------------------|
| <b>182</b> | Nb <sub>3</sub> S <sub>6</sub> Ti, IO <sub>6</sub> PbRb, CsI <sub>11</sub> Nb <sub>6</sub> ,                                                                                                                                                                                                                                                                                                                                                                                                                                                                                                                                                                                                                                                                                                                                                                                                                                                                                                                                                                                                                                                                                                                                                                                                                                                                                                                                                                                               |
| <b>185</b> | Mg <sub>3</sub> Pd, AuCd <sub>3</sub> , Mg <sub>3</sub> Pt, F <sub>3</sub> U,                                                                                                                                                                                                                                                                                                                                                                                                                                                                                                                                                                                                                                                                                                                                                                                                                                                                                                                                                                                                                                                                                                                                                                                                                                                                                                                                                                                                              |
| <b>186</b> | InSb, NZr, Ge, NPd, GaSb, AuScSn, AgSnY, CaSnZn, AuSnY, AuGeY, CaHgSn, AgBiCa, CSc, HgSnSr, HgPbSr, C <sub>4</sub> Al <sub>3</sub> Zr <sub>2</sub> , Au <sub>3</sub> LiSn <sub>4</sub> , C <sub>5</sub> Al <sub>3</sub> Zr <sub>3</sub> , Mo <sub>3</sub> O <sub>8</sub> ScZn, Au <sub>3</sub> Sr <sub>7</sub> , Ag <sub>3</sub> Sr <sub>7</sub> , LiSbSn, LiSnY, InLi <sub>2</sub> Mo <sub>3</sub> O <sub>8</sub> , Ca <sub>5</sub> Pb <sub>3</sub> , AgLaPb, AuSnU, AuGeLa, AuLuSn, AgLuSn, AuGeLu, AuLaSn, C <sub>3</sub> Al <sub>3</sub> U, C <sub>4</sub> Al <sub>3</sub> U <sub>2</sub> , La <sub>7</sub> Pd <sub>3</sub> , Pt <sub>3</sub> Th <sub>7</sub> , La <sub>7</sub> Pt <sub>3</sub> , LiLuSn, Cd <sub>4</sub> La <sub>23</sub> Pt <sub>7</sub> , B <sub>3</sub> Re <sub>7</sub> , B <sub>3</sub> Re <sub>7</sub> ,                                                                                                                                                                                                                                                                                                                                                                                                                                                                                                                                                                                                                                                         |
| <b>187</b> | CAu, CdN, PbSe <sub>2</sub> Ta, NTA, Se <sub>2</sub> Ta, AgN, AlSn, AlGeSr, AlCaSi, AlBaSi, AsBaPd, CW, AlSiSr, AlBaGe, CMo, BaLiSi, CTA, CPt, LiPd, NNb, MoP, NPd, NZr, NW, NbS, STi, TeZr, STA, InS <sub>2</sub> Ta, N <sub>2</sub> Pt, PtSbSr, InSe <sub>2</sub> Ta, N <sub>2</sub> Ta, Al <sub>5</sub> Ba <sub>5</sub> Pb, Ba <sub>5</sub> Ga <sub>5</sub> Pb, CsO <sub>2</sub> Y, GeLiZn, CaLiPb, Al <sub>5</sub> Ba <sub>5</sub> Sn, Au <sub>4</sub> In <sub>6</sub> K, Au <sub>4</sub> In <sub>6</sub> Rb, Ba <sub>5</sub> Ga <sub>5</sub> Sn, CLiNaO <sub>3</sub> , CLa, AuSiTh, AuSiU, Mo <sub>13</sub> P <sub>9</sub> U, NRe, N <sub>2</sub> Re, NRe <sub>3</sub> , ReSe <sub>2</sub> , U <sub>2</sub> Zn <sub>17</sub> ,                                                                                                                                                                                                                                                                                                                                                                                                                                                                                                                                                                                                                                                                                                                                                        |
| <b>188</b> | I <sub>3</sub> LiSc, LaNO <sub>2</sub> Si,                                                                                                                                                                                                                                                                                                                                                                                                                                                                                                                                                                                                                                                                                                                                                                                                                                                                                                                                                                                                                                                                                                                                                                                                                                                                                                                                                                                                                                                 |
| <b>189</b> | GePt <sub>2</sub> , Ag <sub>2</sub> Ga, InMg <sub>2</sub> , InPtY, AsPd <sub>2</sub> , Mg <sub>2</sub> Tl, NTA, Li <sub>2</sub> Sb, PdYZn, BGe <sub>2</sub> Ti <sub>6</sub> , Hf <sub>5</sub> Sc, PdScSn, AlPdY, GePdSc, GePd <sub>2</sub> , GaPtZr, Al <sub>2</sub> Hf <sub>6</sub> Pt, AuInY, AlPtZr, HfMoP, AlHfPt, Pt <sub>2</sub> Si, MgPdY, BSi <sub>2</sub> Ti <sub>6</sub> , InPdY, InPtSc, SiY, MoPZr, MgYZn, PdTIY, Pd <sub>2</sub> Si, PtSnY, PbPdY, PtSb <sub>2</sub> Zr <sub>6</sub> , PtScSn, Au <sub>7</sub> Ga <sub>2</sub> , In <sub>4</sub> Pt <sub>3</sub> Sr <sub>2</sub> , Cd <sub>9</sub> K <sub>14</sub> Tl <sub>21</sub> , Cs <sub>15</sub> Tl <sub>27</sub> , PTi <sub>2</sub> , HgLaPd, InPtU, InLaPd, InPtTh, InPdU, InLuPd, InPdTh, LuPdZn, LaPtSn, GaPdU, InLuPt, AlPdTh, LuPdSn, AuInLu, S <sub>2</sub> U, CdLaPd, AlAuLu, AlLuPd, AgLuPb, AuInLa, LaPdSn, GaPtTh, GaPtU, LaPdTi, AlPtU, LaPbPd, LaMgPd, LuPtSn, Lu <sub>8</sub> Te, Al <sub>13</sub> La <sub>16</sub> , ReSiTi, ReSiZr, ReSiTa, NbReSi, C <sub>15</sub> Re <sub>5</sub> Y <sub>12</sub> ,                                                                                                                                                                                                                                                                                                                                                                                                   |
| <b>190</b> | GaMg <sub>2</sub> , PdScSn, GaPtZr, GaHfPd, Li <sub>2</sub> Sb, AlPtZr, AlHfPt, PtScSn, B <sub>4</sub> Ga <sub>3</sub> Pt <sub>9</sub> , Ge <sub>2</sub> O <sub>13</sub> Rb <sub>3</sub> U <sub>3</sub> , K <sub>3</sub> O <sub>13</sub> Si <sub>2</sub> U <sub>3</sub> ,                                                                                                                                                                                                                                                                                                                                                                                                                                                                                                                                                                                                                                                                                                                                                                                                                                                                                                                                                                                                                                                                                                                                                                                                                  |
| <b>191</b> | AlB <sub>2</sub> , Ag <sub>5</sub> Sr, Au <sub>2</sub> Ba, AuB <sub>2</sub> , Ag <sub>5</sub> Ba, B <sub>2</sub> Nb, B <sub>2</sub> Sc, Al <sub>3</sub> Hf <sub>4</sub> , Au <sub>2</sub> Nb, Au <sub>5</sub> K, B <sub>2</sub> Ta, B <sub>2</sub> Mo, Al <sub>3</sub> Zr <sub>4</sub> , B <sub>2</sub> Y, Au <sub>5</sub> Ba, Au <sub>5</sub> Sr, CaGa <sub>2</sub> , Be <sub>5</sub> Zr, Bi <sub>2</sub> Tl, Be <sub>5</sub> Hf, Be <sub>2</sub> Zr, Be <sub>2</sub> Hf, Be <sub>5</sub> Sc, BaPd <sub>5</sub> , Hg, Hf, CaHg <sub>2</sub> , NNa <sub>3</sub> , Ga <sub>2</sub> Y, Li <sub>2</sub> NNa, Hg <sub>2</sub> Na, BaGa <sub>2</sub> , Hg <sub>2</sub> Y, Si <sub>2</sub> Y, LiNNa <sub>2</sub> , CaPt <sub>5</sub> , S <sub>2</sub> Ti, Rf, N <sub>3</sub> TaTi <sub>2</sub> , Hg <sub>2</sub> Sr, Hf <sub>2</sub> N <sub>3</sub> Ta, N <sub>3</sub> OTa <sub>2</sub> , N <sub>4</sub> Ta <sub>2</sub> , ScSi <sub>2</sub> , N <sub>3</sub> Ta <sub>2</sub> Ti, NTA, PtTl, Au <sub>5</sub> Rb, C <sub>6</sub> Li, Pt <sub>5</sub> Sr, SrZn <sub>5</sub> , BN <sub>3</sub> Ta <sub>2</sub> , YZn <sub>5</sub> , CN <sub>3</sub> Ta <sub>2</sub> , N <sub>3</sub> TaZr <sub>2</sub> , C <sub>12</sub> Li, BaPt <sub>5</sub> , N <sub>3</sub> Ta <sub>2</sub> Zr, NOTa, Ag <sub>7</sub> Te <sub>4</sub> , Si <sub>2</sub> U, Ga <sub>2</sub> La, Si <sub>2</sub> Th, TiU <sub>2</sub> , ThZn <sub>2</sub> , Cd <sub>2</sub> Th, C <sub>3</sub> Si <sub>16</sub> U <sub>20</sub> , |
| <b>193</b> | BGe <sub>3</sub> Ta <sub>5</sub> , Au <sub>6</sub> Hg <sub>5</sub> , BGe <sub>3</sub> Nb <sub>5</sub> , Br <sub>3</sub> Zr, Cl <sub>3</sub> Ti, AgSb <sub>3</sub> Zr <sub>5</sub> , AsPb <sub>3</sub> Zr <sub>5</sub> , Ga <sub>3</sub> Nb <sub>5</sub> , AsSb <sub>3</sub> Zr <sub>5</sub> , AlSn <sub>3</sub> Zr <sub>5</sub> , I <sub>3</sub> Ti, Ga <sub>4</sub> Ti <sub>5</sub> , I <sub>3</sub> Nb, Cl <sub>3</sub> Zr, As <sub>3</sub> Sr <sub>5</sub> , CSb <sub>3</sub> Zr <sub>5</sub> , Ga <sub>3</sub> Ti <sub>5</sub> , Ga <sub>4</sub> Zr <sub>5</sub> , GaSn <sub>3</sub> Zr <sub>5</sub> , P <sub>3</sub> Ti <sub>5</sub> , Nb <sub>5</sub> Si <sub>3</sub> , CSn <sub>3</sub> Zr <sub>5</sub> , InPb <sub>3</sub> Zr <sub>5</sub> , In <sub>3</sub> Y <sub>5</sub> , Al <sub>3</sub> Zr <sub>5</sub> , Al <sub>3</sub> Hf <sub>5</sub> , SSb <sub>3</sub> Zr <sub>5</sub> , Pb <sub>3</sub> SbZr <sub>5</sub> , NSn <sub>3</sub> Zr <sub>5</sub> , Al <sub>3</sub> Y <sub>5</sub> , Ba <sub>3</sub> N, AgIn <sub>3</sub> Zr <sub>5</sub> , AsSn <sub>3</sub> Zr <sub>5</sub> ,                                                                                                                                                                                                                                                                                                                                                                                            |



Part 9 of all the predicted **Case 3**-TSMs:

|     |                                                                                                                                                                                                                                                                                                                                                                                                                                                                                                                                                                                                                                                                                                                                                                                                                                                                                                                                                                                                                                                                                                                                                                                                                                                                                                                                                                                                                                                                                                                                                                                                                                                                                                                                                                                                                                                                                                                                                                                                                                                                                                                                                                                                                                                                                                                                                                                                                                                                                                                                                                                                                                                                                                                                                                                                                                                                                                                                                                                                                                                                                                                                                                                                                                                                                                                                                                                                                                                                                                                                                                                                                                                                                                                      |
|-----|----------------------------------------------------------------------------------------------------------------------------------------------------------------------------------------------------------------------------------------------------------------------------------------------------------------------------------------------------------------------------------------------------------------------------------------------------------------------------------------------------------------------------------------------------------------------------------------------------------------------------------------------------------------------------------------------------------------------------------------------------------------------------------------------------------------------------------------------------------------------------------------------------------------------------------------------------------------------------------------------------------------------------------------------------------------------------------------------------------------------------------------------------------------------------------------------------------------------------------------------------------------------------------------------------------------------------------------------------------------------------------------------------------------------------------------------------------------------------------------------------------------------------------------------------------------------------------------------------------------------------------------------------------------------------------------------------------------------------------------------------------------------------------------------------------------------------------------------------------------------------------------------------------------------------------------------------------------------------------------------------------------------------------------------------------------------------------------------------------------------------------------------------------------------------------------------------------------------------------------------------------------------------------------------------------------------------------------------------------------------------------------------------------------------------------------------------------------------------------------------------------------------------------------------------------------------------------------------------------------------------------------------------------------------------------------------------------------------------------------------------------------------------------------------------------------------------------------------------------------------------------------------------------------------------------------------------------------------------------------------------------------------------------------------------------------------------------------------------------------------------------------------------------------------------------------------------------------------------------------------------------------------------------------------------------------------------------------------------------------------------------------------------------------------------------------------------------------------------------------------------------------------------------------------------------------------------------------------------------------------------------------------------------------------------------------------------------------------|
| 193 | <p>Pb<sub>3</sub>Sc<sub>5</sub>, HfI<sub>3</sub>, Pt<sub>3</sub>Zr<sub>5</sub>, Pb<sub>3</sub>Y<sub>5</sub>, Ge<sub>3</sub>Mo<sub>5</sub>, Sb<sub>4</sub>Zr<sub>5</sub>, Ba<sub>5</sub>Bi<sub>3</sub>, BNb<sub>5</sub>Si<sub>3</sub>, Sb<sub>3</sub>Zr<sub>5</sub>, Pb<sub>3</sub>SnZr<sub>5</sub>, I<sub>3</sub>Zr, Al<sub>3</sub>Ta<sub>5</sub>, Sc<sub>5</sub>Si<sub>3</sub>, Ga<sub>4</sub>Nb<sub>5</sub>, Sn<sub>3</sub>ZnZr<sub>5</sub>, Ge<sub>3</sub>Nb<sub>5</sub>, SiSn<sub>3</sub>Zr<sub>5</sub>, Ga<sub>3</sub>Ti<sub>2</sub>Zr<sub>3</sub>, Sn<sub>3</sub>Y<sub>5</sub>, Ga<sub>3</sub>Zr<sub>5</sub>, Mo<sub>5</sub>Si<sub>3</sub>, Sb<sub>3</sub>Y<sub>5</sub>, Si<sub>3</sub>Ta<sub>5</sub>, BSn<sub>3</sub>Zr<sub>5</sub>, CdPb<sub>3</sub>Zr<sub>5</sub>, Ga<sub>3</sub>Hf<sub>3</sub>Nb<sub>2</sub>, Hg<sub>3</sub>Mg<sub>5</sub>, Pb<sub>3</sub>SiZr<sub>5</sub>, Ga<sub>3</sub>Sc<sub>5</sub>, Sn<sub>4</sub>Zr<sub>5</sub>, Sb<sub>3</sub>Sr<sub>5</sub>, Ca<sub>5</sub>Sb<sub>3</sub>, AgPb<sub>3</sub>Zr<sub>5</sub>, Al<sub>4</sub>Zr<sub>5</sub>, Nb<sub>5</sub>PSi<sub>3</sub>, N<sub>6</sub>Ta<sub>5</sub>, Hf<sub>5</sub>Sb<sub>3</sub>Zn, Ge<sub>3</sub>Sc<sub>5</sub>, Sc<sub>5</sub>Sn<sub>3</sub>, Ga<sub>3</sub>Y<sub>5</sub>, Ge<sub>3</sub>Ta<sub>5</sub>, Pb<sub>3</sub>SeZr<sub>5</sub>, Sb<sub>3</sub>SiZr<sub>5</sub>, As<sub>3</sub>Ca<sub>5</sub>, PPb<sub>3</sub>Zr<sub>5</sub>, Ge<sub>3</sub>Y<sub>5</sub>, N<sub>6</sub>Nb<sub>5</sub>, Si<sub>3</sub>Y<sub>5</sub>, Ga<sub>3</sub>Ta<sub>5</sub>, Tl<sub>3</sub>Y<sub>5</sub>, SSn<sub>3</sub>Zr<sub>5</sub>, Bi<sub>3</sub>Sr<sub>5</sub>, PSn<sub>3</sub>Zr<sub>5</sub>, GePb<sub>3</sub>Zr<sub>5</sub>, Hf<sub>5</sub>Si<sub>3</sub>, Al<sub>3</sub>Hf<sub>5</sub>N, Sb<sub>3</sub>SeZr<sub>5</sub>, SeSn<sub>3</sub>Zr<sub>5</sub>, Hf<sub>5</sub>Sn<sub>3</sub>, Pt<sub>3</sub>Y<sub>5</sub>, Nb<sub>5</sub>OPT<sub>3</sub>, Hf<sub>5</sub>Sn<sub>4</sub>, Ba<sub>5</sub>Sb<sub>3</sub>, K<sub>3</sub>Nb<sub>8</sub>O<sub>21</sub>, Au<sub>41</sub>Mg<sub>13</sub>, Al<sub>43</sub>Mo<sub>4</sub>Y<sub>6</sub>, Ga<sub>3</sub>Lu<sub>5</sub>, Bi<sub>5</sub>La<sub>3</sub>Sc, Ge<sub>3</sub>La<sub>5</sub>, La<sub>5</sub>Si<sub>3</sub>, In<sub>3</sub>Lu<sub>5</sub>, La<sub>5</sub>Sb<sub>3</sub>, BrLa<sub>5</sub>Sn<sub>3</sub>, La<sub>5</sub>Pb<sub>3</sub>Zn, La<sub>5</sub>PPb<sub>3</sub>, La<sub>5</sub>Pb<sub>3</sub>Se, CGe<sub>3</sub>Lu<sub>5</sub>, Lu<sub>5</sub>Sn<sub>3</sub>, Ge<sub>3</sub>U<sub>5</sub>, Lu<sub>5</sub>Tl<sub>3</sub>, Pb<sub>3</sub>Th<sub>5</sub>, Lu<sub>5</sub>Si<sub>3</sub>, Bi<sub>5</sub>La<sub>3</sub>Mg, La<sub>5</sub>Pb<sub>3</sub>S, Sb<sub>5</sub>TiU<sub>3</sub>, Sb<sub>5</sub>ScU<sub>3</sub>, Ge<sub>3</sub>Lu<sub>5</sub>, Lu<sub>5</sub>Pb<sub>3</sub>, HfSb<sub>5</sub>U<sub>3</sub>, Sb<sub>5</sub>U<sub>3</sub>Zr, Lu<sub>5</sub>Pt<sub>3</sub>, CLa<sub>5</sub>Pb<sub>3</sub>, La<sub>3</sub>Sb<sub>5</sub>Zr, HfLa<sub>3</sub>Sb<sub>5</sub>, AgLa<sub>5</sub>Pb<sub>3</sub>, La<sub>5</sub>Pb<sub>3</sub>Sb, BrLa<sub>5</sub>Sb<sub>3</sub>, CLa<sub>5</sub>Sn<sub>3</sub>, La<sub>5</sub>Pb<sub>3</sub>, Bi<sub>3</sub>BrLa<sub>5</sub>, AsLa<sub>5</sub>Pb<sub>3</sub>, Bi<sub>3</sub>La<sub>5</sub>, ClLa<sub>5</sub>Sn<sub>3</sub>, La<sub>3</sub>Sb<sub>5</sub>Ti, Sn<sub>4</sub>Th<sub>5</sub>, Pb<sub>4</sub>Th<sub>5</sub>, ILa<sub>5</sub>Pb<sub>3</sub>, BrIn<sub>3</sub>La<sub>5</sub>, Al<sub>3</sub>Ba<sub>10</sub>Ge<sub>7</sub>,</p>                                                                                                                                                                                              |
| 194 | <p>B<sub>5</sub>W<sub>2</sub>, BaNbS<sub>3</sub>, C<sub>5</sub>Al<sub>3</sub>Zr<sub>3</sub>, BW<sub>4</sub>Zr<sub>9</sub>, Hf<sub>9</sub>Mo<sub>4</sub>P, Cs<sub>6</sub>K<sub>7</sub>, Pb, Si, NbS, Ti, SeZr<sub>2</sub>, Sb, Sc, Tl, Y, STi, Zr, PdSb, PdTe, Sr, PoTi, TeTi, SeTi, TeZr, PtSb, PtTe, PoSc, SbTi, ScTe, NbS<sub>2</sub>, PbSrZn, PZr, NaTi, SrTi<sub>2</sub>, S<sub>2</sub>Ta, NbSe<sub>2</sub>, Se<sub>2</sub>Ta, NbPbS<sub>2</sub>, PTi, O<sub>2</sub>, PbS<sub>2</sub>Ta, TiZn<sub>2</sub>, Pt<sub>2</sub>SnY, NbS<sub>2</sub>Sn, S<sub>2</sub>SnTa, PSbZr<sub>2</sub>, PSbTi<sub>2</sub>, SrZn<sub>2</sub>, SnYZn, Pd<sub>3</sub>Ti, Pd<sub>3</sub>Zr, Pt<sub>2</sub>Sn<sub>3</sub>, Pt<sub>2</sub>Si<sub>3</sub>, Pt<sub>2</sub>Sn<sub>2</sub>Zn<sub>3</sub>, Sn<sub>5</sub>Ti<sub>6</sub>, NbZn<sub>2</sub>, Ag, AgBiCa, AgAsBa, AlZr<sub>2</sub>, AlSc<sub>2</sub>, AlYZn, AlPt<sub>2</sub>Zr, AlHfPt<sub>2</sub>, AlPtTi, Al<sub>3</sub>Y, AsAuBa, AgBaBi, AgAsSr, AsPdSr, AsHf, AsZr, AgBiSr, Nb<sub>4</sub>S<sub>8</sub>Ti, Ag<sub>2</sub>K, AuLiSn, AuCaSb, AuBaSb, AuBiSr, AuNaTe, AuSe, AuSn, AuRbTe, AuBaP, BLi, AuSbSr, AsTi, Al<sub>2</sub>NaO<sub>6</sub>Sb, AuKTe, Al<sub>4</sub>Mg<sub>2</sub>Zn<sub>3</sub>, BaCdGe, BaGeZn, B<sub>4</sub>Mo, BaHgSn, BaPt, AuCaP, BPt<sub>2</sub>, AsPtSr, Au<sub>2</sub>K, BiPd, BiPt, AuSnY, BaPbZn, BiIn<sub>2</sub>, BaTl<sub>2</sub>, Au<sub>3</sub>LiNa<sub>2</sub>, BiNa<sub>3</sub>, AuMg<sub>3</sub>, BaSiZn, BaMg<sub>2</sub>, CaITi<sub>2</sub>, Ba<sub>3</sub>LiN, CaISc<sub>2</sub>, CNb, CGaTi<sub>2</sub>, BaSe<sub>3</sub>Ta, CSc, CAsNb<sub>2</sub>, BaSn<sub>3</sub>, CInZr<sub>2</sub>, BiRb<sub>3</sub>, Br<sub>3</sub>RbTi, CMo, BiK<sub>3</sub>, CGaNb<sub>2</sub>, AlN<sub>3</sub>Ta<sub>4</sub>, CPTa<sub>2</sub>, CSTi<sub>2</sub>, CGaSc<sub>2</sub>, Br<sub>3</sub>CsTi, CAINb<sub>2</sub>, CSZr<sub>2</sub>, CInTa<sub>2</sub>, CInTi<sub>2</sub>, YZn<sub>5</sub>, CSc<sub>2</sub>Tl, Ca, CGaMo<sub>2</sub>, CTIZr<sub>2</sub>, C<sub>2</sub>S<sub>2</sub>Ti<sub>4</sub>, C<sub>2</sub>S<sub>2</sub>Zr<sub>4</sub>, CSiTi<sub>2</sub>, CaHgSn, Al<sub>5</sub>Ba<sub>4</sub>, CaIn<sub>2</sub>, CaHgPb, Ba<sub>3</sub>NNa, CdN, CaPbZn, B<sub>4</sub>W, CaGa<sub>2</sub>, CInSc<sub>2</sub>, CdS<sub>2</sub>Ta, CAITa<sub>2</sub>, BaS<sub>3</sub>Ta, CHF<sub>2</sub>S, CAIW<sub>2</sub>, CaSnZn, Cd<sub>3</sub>Mg, CAIZr<sub>2</sub>, C<sub>2</sub>GeTi<sub>3</sub>, CNb<sub>2</sub>P, CaLi<sub>2</sub>, CGaTa<sub>2</sub>, CInNb<sub>2</sub>, CTi<sub>2</sub>Tl, Cd<sub>3</sub>Sc, CHF<sub>2</sub>Tl, GaPtTi, CHF<sub>2</sub>In, B<sub>5</sub>Mo<sub>2</sub>, Ge, CaZn<sub>2</sub>, Hf, Cl<sub>3</sub>CsTi, CaMg<sub>2</sub>, GaTi<sub>2</sub>, GaYZn, HfPo, CaCd<sub>2</sub>, Cl<sub>3</sub>CsSc, CaPt<sub>2</sub>, GeMg<sub>2</sub>, Be<sub>17</sub>Ti<sub>2</sub>, Ga<sub>2</sub>Mg, Be<sub>17</sub>Hf<sub>2</sub>, Y<sub>2</sub>Zn<sub>17</sub>, Cl<sub>3</sub>RbTi, GaTi<sub>3</sub>, CaHg<sub>3</sub>, C<sub>3</sub>AlNb<sub>4</sub>, HgMg<sub>3</sub>, K, InMoS<sub>2</sub>, Hg<sub>3</sub>Y, AuNa<sub>2</sub>Sn<sub>3</sub>, Li, Hf<sub>2</sub>S, Hg<sub>3</sub>Li, C<sub>4</sub>Al<sub>3</sub>Zr<sub>2</sub>, InY<sub>2</sub>, In<sub>2</sub>Sr, InMg<sub>3</sub>, GaNTi<sub>2</sub>, InSc<sub>2</sub>, In<sub>3</sub>Sr, Hg<sub>3</sub>Sc, Li<sub>2</sub>SiZn, GeYZn, C<sub>2</sub>AlTi<sub>3</sub>, Mg<sub>2</sub>Sn, N<sub>2</sub>, NTa, NZr, MgZn<sub>2</sub>, NNb, InTi<sub>3</sub>, Mg<sub>2</sub>Si, Na, NPt, NPd, Hg<sub>3</sub>Sr, InS<sub>2</sub>W, MoN, InSc<sub>3</sub>, MgNa<sub>2</sub>Pb, Mg<sub>3</sub>Pt, Hf<sub>2</sub>PSb, Mg<sub>3</sub>Pd, KSn<sub>2</sub>, MgNa<sub>2</sub>Sn,</p> |

Part 10 of all the predicted **Case 3**-TSMs:

|            |                                                                                                                                                                                                                                                                                                                                                                                                                                                                                                                                                                                                                                                                                                                                                                                                                                                                                                                                                                                                                                                                                                                                                                                                                                                                                                                                                                                                                                                                                                                                                                                                                                                                                                                                                                                                                                                                                                                                                                                                                                                                                                                                                                                                                                                                                                                                                                                                                                                                                                                                                                                                                            |
|------------|----------------------------------------------------------------------------------------------------------------------------------------------------------------------------------------------------------------------------------------------------------------------------------------------------------------------------------------------------------------------------------------------------------------------------------------------------------------------------------------------------------------------------------------------------------------------------------------------------------------------------------------------------------------------------------------------------------------------------------------------------------------------------------------------------------------------------------------------------------------------------------------------------------------------------------------------------------------------------------------------------------------------------------------------------------------------------------------------------------------------------------------------------------------------------------------------------------------------------------------------------------------------------------------------------------------------------------------------------------------------------------------------------------------------------------------------------------------------------------------------------------------------------------------------------------------------------------------------------------------------------------------------------------------------------------------------------------------------------------------------------------------------------------------------------------------------------------------------------------------------------------------------------------------------------------------------------------------------------------------------------------------------------------------------------------------------------------------------------------------------------------------------------------------------------------------------------------------------------------------------------------------------------------------------------------------------------------------------------------------------------------------------------------------------------------------------------------------------------------------------------------------------------------------------------------------------------------------------------------------------------|
| <b>194</b> | LiTl, KPb <sub>2</sub> , C <sub>3</sub> AlTa <sub>4</sub> , Mg <sub>2</sub> PtSi, N <sub>2</sub> Ta, C <sub>4</sub> Al <sub>3</sub> Hf <sub>2</sub> , N <sub>3</sub> W <sub>2</sub> , Pd <sub>3</sub> Ta, B <sub>4</sub> Ta, BaNa <sub>2</sub> ,<br>BMo <sub>4</sub> Zr <sub>9</sub> , KNa <sub>2</sub> , CsI <sub>3</sub> Ti, BaLi <sub>4</sub> , CaNa <sub>4</sub> Sn <sub>6</sub> , Ga <sub>5</sub> Ta <sub>6</sub> , Mg <sub>2</sub> Y, Mg <sub>2</sub> Sr, HfZn <sub>2</sub> , N <sub>2</sub> Pt, AsHf <sub>9</sub> Mo <sub>4</sub> ,<br>Li <sub>3</sub> Sn <sub>4</sub> Zn <sub>2</sub> , C <sub>6</sub> Al <sub>3</sub> Zr <sub>4</sub> , C <sub>5</sub> Al <sub>3</sub> Hf <sub>3</sub> , AsHf <sub>9</sub> W <sub>4</sub> , HfMo <sub>2</sub> , GeHf <sub>9</sub> Mo <sub>4</sub> , Mg <sub>5</sub> Pd <sub>2</sub> , Hf <sub>9</sub> Mo <sub>4</sub> S, Hf <sub>9</sub> SW <sub>4</sub> , Hf <sub>10</sub> Mo <sub>3</sub> Si,<br>Br <sub>9</sub> Nb <sub>2</sub> Rb <sub>3</sub> ,<br>Hf <sub>9</sub> SeW <sub>4</sub> , BHf <sub>9</sub> Mo <sub>4</sub> , Hf <sub>9</sub> Mo <sub>4</sub> Si, Hf <sub>9</sub> PW <sub>4</sub> , CsK <sub>7</sub> Rb <sub>5</sub> , Mg <sub>38</sub> Sr <sub>9</sub> , Cd <sub>3</sub> K <sub>16</sub> Na <sub>9</sub> Tl <sub>18</sub> , Cd <sub>58</sub> Y <sub>13</sub> , Hg <sub>58</sub> Sr <sub>13</sub> ,<br>Cd <sub>58</sub> Sr <sub>13</sub> , Al <sub>3</sub> Th,<br>InLaZn, Lu, LaTlZn, Al <sub>3</sub> La, AsLaPd, Ga <sub>3</sub> Pd <sub>2</sub> U, CdLaTl, GeLaLi <sub>2</sub> , AlLa <sub>3</sub> , Hg <sub>2</sub> Th, Br <sub>2</sub> La,<br>PdSbU, LaPdSb, InLaPd <sub>2</sub> , Hg <sub>3</sub> La, La, Cd <sub>3</sub> Th, InPt <sub>2</sub> U, Hg <sub>3</sub> Lu, PaPt <sub>3</sub> , AuLaSb, AuGeU,<br>Pd <sub>3</sub> U, Al <sub>2</sub> U, U <sub>2</sub> Zn <sub>17</sub> , Th <sub>2</sub> Zn <sub>17</sub> , LuZn <sub>5</sub> , La <sub>2</sub> Mg <sub>17</sub> , Lu <sub>2</sub> Zn <sub>17</sub> , Cd <sub>17</sub> La <sub>2</sub> , B <sub>2</sub> Re, B <sub>3</sub> Re, NRe,<br>CRe <sub>2</sub> , Re, Be <sub>2</sub> Re, CRe, C <sub>2</sub> Re, NRe <sub>2</sub> , N <sub>2</sub> Re, Re <sub>2</sub> W, B <sub>4</sub> Re, Re <sub>2</sub> Zr, GeHf <sub>9</sub> Re <sub>4</sub> ,<br>Hf <sub>9</sub> PRE <sub>4</sub> , N <sub>2</sub> O <sub>5</sub> , PRe <sub>4</sub> Zr <sub>9</sub> , BRe <sub>4</sub> Zr <sub>9</sub> , AsHf <sub>9</sub> Re <sub>4</sub> , Hf <sub>9</sub> Re <sub>4</sub> Si, BHf <sub>9</sub> Re <sub>4</sub> , Lu <sub>13</sub> Zn <sub>58</sub> , Cd <sub>58</sub> La <sub>13</sub> , AlTi <sub>3</sub> , |
| <b>195</b> | B <sub>12</sub> ,                                                                                                                                                                                                                                                                                                                                                                                                                                                                                                                                                                                                                                                                                                                                                                                                                                                                                                                                                                                                                                                                                                                                                                                                                                                                                                                                                                                                                                                                                                                                                                                                                                                                                                                                                                                                                                                                                                                                                                                                                                                                                                                                                                                                                                                                                                                                                                                                                                                                                                                                                                                                          |
| <b>196</b> | Li <sub>22</sub> Si <sub>5</sub> ,                                                                                                                                                                                                                                                                                                                                                                                                                                                                                                                                                                                                                                                                                                                                                                                                                                                                                                                                                                                                                                                                                                                                                                                                                                                                                                                                                                                                                                                                                                                                                                                                                                                                                                                                                                                                                                                                                                                                                                                                                                                                                                                                                                                                                                                                                                                                                                                                                                                                                                                                                                                         |
| <b>197</b> | Bi <sub>12</sub> O <sub>20</sub> Zn,                                                                                                                                                                                                                                                                                                                                                                                                                                                                                                                                                                                                                                                                                                                                                                                                                                                                                                                                                                                                                                                                                                                                                                                                                                                                                                                                                                                                                                                                                                                                                                                                                                                                                                                                                                                                                                                                                                                                                                                                                                                                                                                                                                                                                                                                                                                                                                                                                                                                                                                                                                                       |
| <b>198</b> | BaPdSi, AsPdS, BaPPt, Ba <sub>8</sub> Ga <sub>7</sub> , AlPd, AuBe, AlPt, BiPdSe, BiPdTe, AsPdSe,<br>GaPd, BiPtTe, GaPt, AsBaPt, F <sub>2</sub> Pd, HfSb, AuGaNb <sub>3</sub> , HfSn, BiPtSe, AlAu <sub>4</sub> , BaGePt,<br>BaPtSi, GePtSr, CaPtSi, PdSbSe, PdSSb, AuGaTa <sub>3</sub> , PdSbTe, PtSbSe, SbZr, PtSSb, PdSiSr,<br>PtSiSr, Ga <sub>7</sub> Sr <sub>8</sub> , Al <sub>7</sub> Sr <sub>8</sub> , Al <sub>2</sub> Sr <sub>3</sub> , Ag <sub>9</sub> GaSe <sub>6</sub> , GaSr, ReSi, AlSr,                                                                                                                                                                                                                                                                                                                                                                                                                                                                                                                                                                                                                                                                                                                                                                                                                                                                                                                                                                                                                                                                                                                                                                                                                                                                                                                                                                                                                                                                                                                                                                                                                                                                                                                                                                                                                                                                                                                                                                                                                                                                                                                      |
| <b>199</b> | Bi <sub>2</sub> Pd <sub>3</sub> S <sub>2</sub> , Bi <sub>2</sub> Pt <sub>3</sub> Se <sub>2</sub> , N <sub>2</sub> O <sub>4</sub> ,                                                                                                                                                                                                                                                                                                                                                                                                                                                                                                                                                                                                                                                                                                                                                                                                                                                                                                                                                                                                                                                                                                                                                                                                                                                                                                                                                                                                                                                                                                                                                                                                                                                                                                                                                                                                                                                                                                                                                                                                                                                                                                                                                                                                                                                                                                                                                                                                                                                                                         |
| <b>200</b> | CdN <sub>3</sub> O <sub>6</sub> Tl, Po, HgN <sub>3</sub> O <sub>6</sub> Rb, HgN <sub>3</sub> O <sub>6</sub> Tl, Au <sub>6</sub> In <sub>5</sub> Na <sub>2</sub> ,                                                                                                                                                                                                                                                                                                                                                                                                                                                                                                                                                                                                                                                                                                                                                                                                                                                                                                                                                                                                                                                                                                                                                                                                                                                                                                                                                                                                                                                                                                                                                                                                                                                                                                                                                                                                                                                                                                                                                                                                                                                                                                                                                                                                                                                                                                                                                                                                                                                          |
| <b>201</b> | O <sub>9</sub> Sb <sub>3</sub> Tl <sub>2</sub> ,                                                                                                                                                                                                                                                                                                                                                                                                                                                                                                                                                                                                                                                                                                                                                                                                                                                                                                                                                                                                                                                                                                                                                                                                                                                                                                                                                                                                                                                                                                                                                                                                                                                                                                                                                                                                                                                                                                                                                                                                                                                                                                                                                                                                                                                                                                                                                                                                                                                                                                                                                                           |
| <b>204</b> | P <sub>3</sub> Pd, Ge <sub>12</sub> Pt <sub>4</sub> Th, Ge <sub>12</sub> Pt <sub>4</sub> U, Ge <sub>12</sub> LaPt <sub>4</sub> , Al <sub>12</sub> Re, O <sub>3</sub> Re,                                                                                                                                                                                                                                                                                                                                                                                                                                                                                                                                                                                                                                                                                                                                                                                                                                                                                                                                                                                                                                                                                                                                                                                                                                                                                                                                                                                                                                                                                                                                                                                                                                                                                                                                                                                                                                                                                                                                                                                                                                                                                                                                                                                                                                                                                                                                                                                                                                                   |
| <b>205</b> | AlSb, AsGa, AsIn, AuSb <sub>2</sub> , AuN <sub>2</sub> , Bi <sub>2</sub> Pt, B <sub>12</sub> , N <sub>2</sub> Ta, NaO <sub>2</sub> , Cl <sub>4</sub> Pt,<br>P <sub>2</sub> Pt <sub>6</sub> Sr, O <sub>2</sub> Pa, C <sub>2</sub> U, N <sub>2</sub> Re, As <sub>4</sub> Cl <sub>7</sub> Hg <sub>6</sub> Ti, As <sub>4</sub> Br <sub>7</sub> Hg <sub>6</sub> Ti, Cl <sub>7</sub> Hg <sub>6</sub> P <sub>4</sub> Ti,                                                                                                                                                                                                                                                                                                                                                                                                                                                                                                                                                                                                                                                                                                                                                                                                                                                                                                                                                                                                                                                                                                                                                                                                                                                                                                                                                                                                                                                                                                                                                                                                                                                                                                                                                                                                                                                                                                                                                                                                                                                                                                                                                                                                          |
| <b>206</b> | C <sub>8</sub> , As <sub>2</sub> Zn <sub>3</sub> , Ge, Si, Bi <sub>2</sub> Mg <sub>3</sub> , Lu <sub>2</sub> N <sub>3</sub> , N <sub>3</sub> U <sub>2</sub> ,                                                                                                                                                                                                                                                                                                                                                                                                                                                                                                                                                                                                                                                                                                                                                                                                                                                                                                                                                                                                                                                                                                                                                                                                                                                                                                                                                                                                                                                                                                                                                                                                                                                                                                                                                                                                                                                                                                                                                                                                                                                                                                                                                                                                                                                                                                                                                                                                                                                              |
| <b>208</b> | Na <sub>11</sub> O <sub>16</sub> U <sub>5</sub> ,                                                                                                                                                                                                                                                                                                                                                                                                                                                                                                                                                                                                                                                                                                                                                                                                                                                                                                                                                                                                                                                                                                                                                                                                                                                                                                                                                                                                                                                                                                                                                                                                                                                                                                                                                                                                                                                                                                                                                                                                                                                                                                                                                                                                                                                                                                                                                                                                                                                                                                                                                                          |
| <b>210</b> | O <sub>2</sub> Si,                                                                                                                                                                                                                                                                                                                                                                                                                                                                                                                                                                                                                                                                                                                                                                                                                                                                                                                                                                                                                                                                                                                                                                                                                                                                                                                                                                                                                                                                                                                                                                                                                                                                                                                                                                                                                                                                                                                                                                                                                                                                                                                                                                                                                                                                                                                                                                                                                                                                                                                                                                                                         |
| <b>212</b> | BLi <sub>2</sub> Pd <sub>3</sub> , BLi <sub>2</sub> Pt <sub>3</sub> , Ga <sub>5</sub> LiO <sub>8</sub> , Si <sub>2</sub> Sr,                                                                                                                                                                                                                                                                                                                                                                                                                                                                                                                                                                                                                                                                                                                                                                                                                                                                                                                                                                                                                                                                                                                                                                                                                                                                                                                                                                                                                                                                                                                                                                                                                                                                                                                                                                                                                                                                                                                                                                                                                                                                                                                                                                                                                                                                                                                                                                                                                                                                                               |
| <b>213</b> | CaAl <sub>2</sub> Nb <sub>3</sub> , Au <sub>2</sub> Nb <sub>3</sub> , CaI <sub>2</sub> Ta <sub>3</sub> , Al <sub>2</sub> NNb <sub>3</sub> , Mo <sub>3</sub> NPd <sub>2</sub> , Mo <sub>3</sub> NPt <sub>2</sub> , Ba <sub>24</sub> Ge <sub>100</sub> , Ag <sub>3</sub> AuS <sub>2</sub> , Ba <sub>24</sub> Si <sub>100</sub> , CMo <sub>3</sub> Re <sub>2</sub> ,<br>CRe <sub>2</sub> W <sub>3</sub> ,                                                                                                                                                                                                                                                                                                                                                                                                                                                                                                                                                                                                                                                                                                                                                                                                                                                                                                                                                                                                                                                                                                                                                                                                                                                                                                                                                                                                                                                                                                                                                                                                                                                                                                                                                                                                                                                                                                                                                                                                                                                                                                                                                                                                                     |
| <b>214</b> | C, Br <sub>3</sub> La <sub>3</sub> Si, I <sub>3</sub> La <sub>3</sub> Pb, GeI <sub>3</sub> La <sub>3</sub> , O <sub>9</sub> U <sub>4</sub> ,                                                                                                                                                                                                                                                                                                                                                                                                                                                                                                                                                                                                                                                                                                                                                                                                                                                                                                                                                                                                                                                                                                                                                                                                                                                                                                                                                                                                                                                                                                                                                                                                                                                                                                                                                                                                                                                                                                                                                                                                                                                                                                                                                                                                                                                                                                                                                                                                                                                                               |
| <b>215</b> | Al <sub>3</sub> Li <sub>8</sub> Si <sub>5</sub> , C <sub>7</sub> B, Li <sub>10</sub> Pb <sub>3</sub> , Ag <sub>9</sub> In <sub>4</sub> , Ca <sub>4</sub> Hg <sub>9</sub> ,                                                                                                                                                                                                                                                                                                                                                                                                                                                                                                                                                                                                                                                                                                                                                                                                                                                                                                                                                                                                                                                                                                                                                                                                                                                                                                                                                                                                                                                                                                                                                                                                                                                                                                                                                                                                                                                                                                                                                                                                                                                                                                                                                                                                                                                                                                                                                                                                                                                 |
| <b>216</b> | AuBe <sub>5</sub> , AgAlLi <sub>2</sub> , AgAsMg, AgBiLi <sub>2</sub> , AgCdSb, AgLi <sub>2</sub> Pb, AgLi <sub>2</sub> Sn, AgMgSb, AgO, AgSe,<br>Ag <sub>2</sub> LiSn,                                                                                                                                                                                                                                                                                                                                                                                                                                                                                                                                                                                                                                                                                                                                                                                                                                                                                                                                                                                                                                                                                                                                                                                                                                                                                                                                                                                                                                                                                                                                                                                                                                                                                                                                                                                                                                                                                                                                                                                                                                                                                                                                                                                                                                                                                                                                                                                                                                                    |

Part 11 of all the predicted **Case 3**-TSMs:

|     |                                                                                                                                                                                                                                                                                                                                                                                                                                                                                                                                                                                                                                                                                                                                                                                                                                                                                                                                                                                                                                                                                                                                                                                                                                                                                                                                                                                                                                                                                                                                                                                                                                                                                                                                                                                                                                                                                                                                                                                                                                                                   |
|-----|-------------------------------------------------------------------------------------------------------------------------------------------------------------------------------------------------------------------------------------------------------------------------------------------------------------------------------------------------------------------------------------------------------------------------------------------------------------------------------------------------------------------------------------------------------------------------------------------------------------------------------------------------------------------------------------------------------------------------------------------------------------------------------------------------------------------------------------------------------------------------------------------------------------------------------------------------------------------------------------------------------------------------------------------------------------------------------------------------------------------------------------------------------------------------------------------------------------------------------------------------------------------------------------------------------------------------------------------------------------------------------------------------------------------------------------------------------------------------------------------------------------------------------------------------------------------------------------------------------------------------------------------------------------------------------------------------------------------------------------------------------------------------------------------------------------------------------------------------------------------------------------------------------------------------------------------------------------------------------------------------------------------------------------------------------------------|
| 216 | <p>AlBi, AlLi<sub>2</sub>Pd, AlLi<sub>2</sub>Pt, AlTi<sub>2</sub>, AlTi<sub>2</sub>Zn, AsCdLi, AlTi<sub>3</sub>, AsIn, AsCsRb, AsTl,<br/> AuBiCa, AuBiLi<sub>2</sub>, AuCdSb, AlMo<sub>4</sub>S<sub>8</sub>, AuGeLi<sub>2</sub>, AuInLi<sub>2</sub>, AuLiSb, AuLiMgSn, AuLi<sub>2</sub>Pb, AuLi<sub>2</sub>Sn,<br/> AuMgSn,<br/> AuN, AuPbY, BBi, BTi, Au<sub>5</sub>Ca, BiGa, BiIn, BiLiMg, BiPdY, CAg, CCd,<br/> CMo, CNSi, CNb, CPd, CSc, CTa, CW, CY, CdLi<sub>2</sub>Pb, CdN, CdPo,<br/> CdNa<sub>2</sub>Pb, CGaMo<sub>4</sub>S<sub>8</sub>, CsNRb, CsPRb, GaLi<sub>2</sub>Pd, GaLi<sub>2</sub>Pt, GaMo<sub>4</sub>Se<sub>4</sub>Te<sub>4</sub>, GaSb, GaMo<sub>4</sub>S<sub>8</sub>, GaMo<sub>4</sub>Se<sub>8</sub>,<br/> GaTi<sub>2</sub>,<br/> GaTi<sub>3</sub>, GaS<sub>8</sub>Ti<sub>4</sub>, GeInLi, GaNb<sub>4</sub>Se<sub>8</sub>, GeP, GeSc, HfN, GeTi<sub>3</sub>, GaMo<sub>4</sub>S<sub>8</sub>Si, HgSe, GaNb<sub>4</sub>S<sub>8</sub>,<br/> HgTe, InLi<sub>2</sub>Pd, InLi<sub>2</sub>Pt, InSb, InTi<sub>3</sub>, InTi<sub>2</sub>, GaSe<sub>8</sub>Ta<sub>4</sub>, LiMgPdSn, LiMgPdSb, LiMgPtSn, LiMgPtSb,<br/> GaSe<sub>4</sub>Ta<sub>4</sub>Te<sub>4</sub>, Li<sub>2</sub>PdSb, Li<sub>2</sub>PtSb, MgPtSb, MgPdSb, MoN, MoP, NPd, I<sub>4</sub>Nb<sub>4</sub>Se<sub>4</sub>, NPt, NTi,<br/> INbSe, Li<sub>2</sub>O<sub>4</sub>S, NW, NZn, NZr, PSi, PTL, PoZn, PtScSn, RbSb, RbTe,<br/> SbSn, SbTl, ScSn, SiTi<sub>3</sub>, SnTi<sub>3</sub>, Pd<sub>10</sub>Te<sub>3</sub>, AuSTa<sub>5</sub>, Mg<sub>5</sub>Pd<sub>10</sub>Si<sub>16</sub>, Mg<sub>5</sub>Pt<sub>10</sub>Si<sub>16</sub>, Ba<sub>14</sub>Li<sub>6</sub>N<sub>6</sub>Na<sub>10</sub>,<br/> Ba<sub>14</sub>Li<sub>5</sub>N<sub>6</sub>Na<sub>11</sub>,<br/> In<sub>2</sub>Te<sub>3</sub>, Li<sub>22</sub>Si<sub>5</sub>, Li<sub>17</sub>Pb<sub>4</sub>, BiLaPt, LuPtSb, AuPt<sub>4</sub>U, PaPt<sub>5</sub>, CRe, Cd<sub>45</sub>Lu<sub>11</sub>, Hg<sub>45</sub>La<sub>11</sub>, Li<sub>17</sub>Si<sub>4</sub>,<br/> Ge<sub>4</sub>Li<sub>17</sub>, AgLi<sub>2</sub>Sb,</p> |
| 217 | <p>Ag<sub>5</sub>Zn<sub>8</sub>, Ag<sub>5</sub>Cd<sub>8</sub>, Al<sub>12</sub>Mg<sub>17</sub>, Ge<sub>8</sub>Na<sub>6</sub>Pt<sub>8</sub>, Au<sub>5</sub>Cd<sub>8</sub>, Al<sub>12</sub>Ta<sub>17</sub>, Mg<sub>24</sub>Y<sub>5</sub>, K<sub>10</sub>Pb<sub>48</sub>, Pd<sub>16</sub>S<sub>7</sub>, OTa<sub>2</sub>,<br/> In<sub>5</sub>Na<sub>24</sub>O<sub>15</sub>, F<sub>9</sub>U<sub>2</sub>, Al<sub>5</sub>Re<sub>24</sub>, Re<sub>24</sub>Sc<sub>5</sub>, Re<sub>24</sub>Ti<sub>5</sub>, Mo<sub>5</sub>Re<sub>24</sub>, Re<sub>24</sub>Zr<sub>5</sub>, Hf<sub>5</sub>Re<sub>24</sub>, La<sub>6</sub>P<sub>17</sub>Pd<sub>6</sub>,</p>                                                                                                                                                                                                                                                                                                                                                                                                                                                                                                                                                                                                                                                                                                                                                                                                                                                                                                                                                                                                                                                                                                                                                                                                                                                                                                                                                                                                                      |
| 218 | <p>Al<sub>6</sub>K<sub>8</sub>O<sub>24</sub>Si<sub>6</sub>, Al<sub>6</sub>Na<sub>8</sub>O<sub>24</sub>Si<sub>6</sub>,</p>                                                                                                                                                                                                                                                                                                                                                                                                                                                                                                                                                                                                                                                                                                                                                                                                                                                                                                                                                                                                                                                                                                                                                                                                                                                                                                                                                                                                                                                                                                                                                                                                                                                                                                                                                                                                                                                                                                                                         |
| 219 | <p>C<sub>4</sub>N<sub>4</sub>Tl<sub>2</sub>Zn,</p>                                                                                                                                                                                                                                                                                                                                                                                                                                                                                                                                                                                                                                                                                                                                                                                                                                                                                                                                                                                                                                                                                                                                                                                                                                                                                                                                                                                                                                                                                                                                                                                                                                                                                                                                                                                                                                                                                                                                                                                                                |
| 220 | <p>Hf<sub>3</sub>N<sub>4</sub>, Li<sub>15</sub>Si<sub>4</sub>, Ge<sub>4</sub>Li<sub>15</sub>, Li<sub>12</sub>Mg<sub>3</sub>Si<sub>4</sub>, Li<sub>15</sub>Pd<sub>4</sub>, Na<sub>15</sub>Pb<sub>4</sub>, Na<sub>15</sub>Sn<sub>4</sub>, Ge<sub>3</sub>O<sub>12</sub>Sb<sub>4</sub>, O<sub>36</sub>P<sub>12</sub>Sc<sub>4</sub>, As<sub>3</sub>Ti<sub>4</sub>,<br/> Al<sub>3</sub>Li<sub>12</sub>Si<sub>4</sub>, Au<sub>3</sub>Sb<sub>4</sub>Y<sub>3</sub>, Ba<sub>4</sub>Bi<sub>3</sub>, Bi<sub>3</sub>Sr<sub>4</sub>, C<sub>3</sub>N<sub>4</sub>, C<sub>3</sub>Sc<sub>4</sub>, Cs<sub>4</sub>O<sub>6</sub>, N<sub>4</sub>Zr<sub>3</sub>, Ge<sub>3</sub>N<sub>4</sub>, P<sub>3</sub>Ti<sub>4</sub>, Sb<sub>3</sub>Y<sub>4</sub>,<br/> Au<sub>4</sub>Li<sub>15</sub>, C<sub>3</sub>Sc<sub>2</sub>, C<sub>3</sub>Y<sub>2</sub>, Bi<sub>4</sub>U<sub>3</sub>, Bi<sub>3</sub>La<sub>4</sub>, La<sub>4</sub>Pb<sub>3</sub>, P<sub>4</sub>Th<sub>3</sub>, Se<sub>4</sub>U<sub>3</sub>, P<sub>4</sub>U<sub>3</sub>, As<sub>4</sub>Pa<sub>3</sub>, La<sub>4</sub>Sb<sub>3</sub>,<br/> Au<sub>3</sub>Sn<sub>4</sub>U<sub>3</sub>, As<sub>4</sub>Th<sub>3</sub>, Pa<sub>3</sub>Sb<sub>4</sub>, La<sub>3</sub>Se<sub>4</sub>, Sb<sub>4</sub>U<sub>3</sub>, Pd<sub>3</sub>Sb<sub>4</sub>U<sub>3</sub>, Bi<sub>4</sub>Th<sub>3</sub>, As<sub>3</sub>La<sub>4</sub>, Ge<sub>3</sub>La<sub>4</sub>, Te<sub>4</sub>U<sub>3</sub>, Pt<sub>3</sub>Sb<sub>4</sub>U<sub>3</sub>,<br/> La<sub>3</sub>Te<sub>4</sub>, Sb<sub>4</sub>Th<sub>3</sub>, Pt<sub>3</sub>Sn<sub>4</sub>U<sub>3</sub>, Bi<sub>4</sub>La<sub>3</sub>Pt<sub>3</sub>, C<sub>3</sub>U<sub>2</sub>, C<sub>3</sub>Th<sub>2</sub>, C<sub>3</sub>Lu<sub>2</sub>, Ca<sub>12</sub>Li<sub>6</sub>N<sub>16</sub>O<sub>3</sub>Re<sub>4</sub>, P<sub>4</sub>Pa<sub>3</sub>, As<sub>4</sub>U<sub>3</sub>,<br/> Au<sub>3</sub>Lu<sub>3</sub>Sb<sub>4</sub>,</p>                                                                                                                                                                 |
| 221 | <p>AuCl<sub>3</sub>Cs, AuCa<sub>3</sub>N, CaIPt<sub>3</sub>, CInTi<sub>3</sub>, CW, CY, CSc<sub>3</sub>Tl, Cd<sub>3</sub>In, Ca<sub>3</sub>NPb, F<sub>3</sub>Ta,<br/> Ga<sub>3</sub>Sc, HfPt, InY, InPd<sub>3</sub>, CPt<sub>3</sub>Y, LiPb, BPt<sub>3</sub>Sc, F<sub>3</sub>Mo, MgPd<sub>3</sub>, PSc, InNSc<sub>3</sub>,<br/> CPbPt<sub>3</sub>, TiZn<sub>3</sub>, In<sub>3</sub>Sc, Pd<sub>3</sub>Sn, SnTi<sub>3</sub>, NaO<sub>3</sub>W, MoN, MgTl, MgY, NNb, NPd,<br/> NZr, NSc, NTi, NZn, NTa, NPd<sub>3</sub>, NbZn<sub>3</sub>, MoO<sub>3</sub>Sr, NNa<sub>3</sub>, Nb<sub>3</sub>Si, MgSc,<br/> NaPb<sub>3</sub>, NbO<sub>3</sub>Sr, P, MgSr, NbO, PY, PbPd<sub>3</sub>, N<sub>4</sub>W<sub>3</sub>, O<sub>3</sub>SnTa, PdSc, PdZr,<br/> Po, PdTi, PtSc, Pb<sub>3</sub>Y, Pd<sub>3</sub>Ti, Pd<sub>3</sub>Y, Pd<sub>3</sub>Zr, PtZr, PtTi, SbSn, Sb,<br/> STl, SbSc, SbTl, ScZn, SbY, Se, SeTl, SrTe, Pt<sub>3</sub>Ti, Pt<sub>3</sub>Zr, SrTl,<br/> Pt<sub>3</sub>Y, ZnZr, TiY, YZn, TiY, Sn<sub>3</sub>Y, Tl<sub>3</sub>Y, Pd<sub>17</sub>Se<sub>15</sub>, AgCd, AgMg, AgPt<sub>3</sub>,<br/> AgSc, AgY, AgZn, Ag<sub>3</sub>In, Ag<sub>3</sub>Mg, Ag<sub>3</sub>Pt, AlMo, AlPd, AlNTi<sub>3</sub>, AlPt<sub>3</sub>, AlZr<sub>3</sub>,<br/> AlY<sub>3</sub>, Al<sub>3</sub>Li, Al<sub>3</sub>Hf, Al<sub>3</sub>Ti, Al<sub>3</sub>Sc, Al<sub>3</sub>Zr, As, AsSc, AuCd, AsY, AuMg,<br/> AuPd<sub>3</sub>,</p>                                                                                                                                                                                                                                                                                                                                                                                                                                                                                                                                                                                                                                          |

Part 12 of all the predicted **Case 3-TSMs**:

|     |                                                                                                                                                                                                                                                                                                                                                                                                                                                                                                                                                                                                                                                                                                                                                                                                                                                                                                                                                                                                                                                                                                                                                                                                                                                                                                                                                                                                                                                                                                                                                                                                                                                                                                                                                                                                                                                                                                                                                                                                                                                                                                                                                                                                                                                                                                                                                                                                                                                                                                                                                                                                                                                  |
|-----|--------------------------------------------------------------------------------------------------------------------------------------------------------------------------------------------------------------------------------------------------------------------------------------------------------------------------------------------------------------------------------------------------------------------------------------------------------------------------------------------------------------------------------------------------------------------------------------------------------------------------------------------------------------------------------------------------------------------------------------------------------------------------------------------------------------------------------------------------------------------------------------------------------------------------------------------------------------------------------------------------------------------------------------------------------------------------------------------------------------------------------------------------------------------------------------------------------------------------------------------------------------------------------------------------------------------------------------------------------------------------------------------------------------------------------------------------------------------------------------------------------------------------------------------------------------------------------------------------------------------------------------------------------------------------------------------------------------------------------------------------------------------------------------------------------------------------------------------------------------------------------------------------------------------------------------------------------------------------------------------------------------------------------------------------------------------------------------------------------------------------------------------------------------------------------------------------------------------------------------------------------------------------------------------------------------------------------------------------------------------------------------------------------------------------------------------------------------------------------------------------------------------------------------------------------------------------------------------------------------------------------------------------|
| 221 | <p>AuSc, AuTi, AuY, AuTi<sub>3</sub>, AuZn, Au<sub>3</sub>Li, Au<sub>3</sub>Pd, BPbSc<sub>3</sub>, BPd<sub>3</sub>Sc, BInSc<sub>3</sub>, BPd<sub>3</sub>Y, BSc<sub>3</sub>Sn, BSc<sub>3</sub>Tl, BPt<sub>3</sub>Y, B<sub>6</sub>K, BaCd, BaHg, BaNbO<sub>3</sub>, BaMoO<sub>3</sub>, B<sub>6</sub>Y, BaO<sub>3</sub>Pb, BaZn, BePd, Bi, BiTl, Bi<sub>3</sub>Sr, Br<sub>3</sub>CsHg, CAITi<sub>3</sub>, CAISc<sub>3</sub>, CCaPd<sub>3</sub>, CHf, CGaSc<sub>3</sub>, CGaY<sub>3</sub>, CInSc<sub>3</sub>, CNTl, CInPt<sub>3</sub>, CInY<sub>3</sub>, CNb, CMg<sub>3</sub>Zn, CPbSc<sub>3</sub>, CPbY<sub>3</sub>, CPt, CPd<sub>3</sub>Y, CSc, CPd<sub>3</sub>Sc, CPT<sub>3</sub>Sc, CSnY<sub>3</sub>, CTa, CSc<sub>3</sub>Sn, CZr, CTIY<sub>3</sub>, CTI<sub>3</sub>Tl, Ca, CaCd, CaHg, CaIn, CaPb<sub>3</sub>, CaTe, CaSn<sub>3</sub>, CaTl, CaTl<sub>3</sub>, Ca<sub>3</sub>NSn, Ca<sub>3</sub>Ntl, Ca<sub>3</sub>Pb, CdN, CdSr, CdY, CdSc, Cd<sub>3</sub>Nb, C<sub>20</sub>, CsNO<sub>2</sub>, CsIO<sub>3</sub>, F<sub>3</sub>KPd, F<sub>3</sub>PdRb, F<sub>3</sub>Nb, GaPt<sub>3</sub>, GeNb<sub>3</sub>, GeTe, HfPd, HfPt<sub>3</sub>, Al<sub>2</sub>Ca<sub>3</sub>O<sub>6</sub>, HgLi, HgSc, HgSr, HgTl, HgY, Hg<sub>3</sub>Zr, Hg<sub>3</sub>Tl, InPd, InMg<sub>3</sub>, InSb, InPt<sub>3</sub>, InNTi<sub>3</sub>, InSc<sub>3</sub>, InTe, InZr<sub>3</sub>, In<sub>3</sub>Mg, In<sub>3</sub>Y, LiPd, CaHg<sub>11</sub>, BaHg<sub>11</sub>, Hg<sub>11</sub>K, In<sub>14</sub>K<sub>3</sub>Mg<sub>20</sub>, Hg<sub>11</sub>Rb, Hg<sub>11</sub>Sr, BiMg<sub>64</sub>Si<sub>31</sub>, AgLa, AsTh, AsU, AuLu, AlLu<sub>3</sub>N, BInLa<sub>3</sub>, BLuPd<sub>3</sub>, AllLa<sub>3</sub>, BLaPd<sub>3</sub>, B<sub>6</sub>La, AlLa<sub>3</sub>N, BLaPt<sub>3</sub>, BiTh, BiU, Ga<sub>3</sub>U, CdLu, CLa<sub>3</sub>Tl, InLa, HgLa, HgLu, In<sub>3</sub>Lu, LaZn, Ga<sub>3</sub>Lu, GaLaO<sub>3</sub>, LuPd, LuPd<sub>3</sub>, LuMg, LaTl, LuSb, LuPt<sub>3</sub>, KO<sub>3</sub>U, LuPb<sub>3</sub>, LaTe, B<sub>6</sub>Th, LuTl<sub>3</sub>, In<sub>3</sub>La, LaPd<sub>3</sub>, O<sub>3</sub>RbU, LaPb<sub>3</sub>, LaPt<sub>3</sub>, InLa<sub>3</sub>, SbU, SbTh, TeTh, LaO<sub>3</sub>Ti, In<sub>3</sub>U, ThTl<sub>3</sub>, La<sub>3</sub>Tl, LaSn<sub>3</sub>, La<sub>3</sub>Sn, Si<sub>3</sub>U, TeU, LaTl<sub>3</sub>, CLaPd<sub>3</sub>, InLa<sub>3</sub>N, Tl<sub>3</sub>U, Pb<sub>3</sub>Th, CALLa<sub>3</sub>, CLa<sub>3</sub>Pb, InLu<sub>3</sub>N, CLaPt<sub>3</sub>, B<sub>6</sub>Lu, CLu<sub>3</sub>Sn, S<sub>3</sub>U<sub>4</sub>, Cd<sub>11</sub>La, Cd<sub>11</sub>Th, AlRe, CRe, NRe, ReTi, O<sub>3</sub>Re, PbTi,</p> |
| 223 | <p>AlMo<sub>3</sub>, AlNb<sub>3</sub>, AsTi<sub>3</sub>, AuTl<sub>3</sub>, AuTi<sub>3</sub>, AuNb<sub>3</sub>, AuTa<sub>3</sub>, AuZr<sub>3</sub>, BeMo<sub>3</sub>, Cl<sub>3</sub>Na, GaMo<sub>3</sub>, GaNb<sub>3</sub>, CaO<sub>4</sub>Pd<sub>3</sub>, CdO<sub>4</sub>Pd<sub>3</sub>, GeMo<sub>3</sub>, GeNb<sub>3</sub>, AuZn<sub>3</sub>, Ba<sub>2</sub>Si<sub>46</sub>, Ba<sub>6</sub>Si<sub>46</sub>, Ba<sub>6</sub>Na<sub>2</sub>Si<sub>46</sub>, InNb<sub>3</sub>, Ba<sub>8</sub>Si<sub>46</sub>, Mo<sub>3</sub>Pt, Mo<sub>3</sub>Si, NPd<sub>3</sub>, Mo<sub>3</sub>Sn, NaO<sub>4</sub>Pd<sub>3</sub>, Cs<sub>3</sub>Hg<sub>20</sub>, NaO<sub>4</sub>Pt<sub>3</sub>, Nb<sub>3</sub>Pb, Nb<sub>3</sub>Pt, Ga<sub>16</sub>Ge<sub>30</sub>Na<sub>8</sub>, Nb<sub>3</sub>Sn, Nb<sub>3</sub>Si, Hg<sub>20</sub>Rb<sub>3</sub>, Nb<sub>3</sub>Te, Nb<sub>3</sub>Tl, OW<sub>3</sub>, OW<sub>3</sub>, Ge<sub>30</sub>In<sub>16</sub>K<sub>8</sub>, O<sub>4</sub>Pd<sub>3</sub>Sr, K<sub>8</sub>Si<sub>46</sub>, O<sub>4</sub>Pt<sub>3</sub>, Ge<sub>40</sub>In<sub>6</sub>K<sub>8</sub>, PdTi<sub>3</sub>, PtTi<sub>3</sub>, PtTl<sub>3</sub>, Au<sub>6</sub>Ba<sub>8</sub>Ge<sub>40</sub>, Pd<sub>3</sub>S<sub>4</sub>Y, SbTi<sub>3</sub>, SnTa<sub>3</sub>, Ba<sub>4</sub>Ge<sub>20</sub>Pd<sub>3</sub>, SnZr<sub>3</sub>, Au<sub>6</sub>Ba<sub>8</sub>Si<sub>40</sub>, Ag<sub>3</sub>Ba<sub>4</sub>Ge<sub>20</sub>, Au<sub>3</sub>Ba<sub>4</sub>Ge<sub>20</sub>, Na<sub>4</sub>Si<sub>23</sub>, Ge<sub>46</sub>K<sub>8</sub>, Na<sub>8</sub>Si<sub>46</sub>, Ba<sub>4</sub>Ge<sub>20</sub>Pt<sub>3</sub>, Cs<sub>8</sub>Sn<sub>46</sub>, Cs<sub>4</sub>Sn<sub>23</sub>, Cs<sub>4</sub>Sn<sub>23</sub>, K<sub>8</sub>Sn<sub>46</sub>, In<sub>48</sub>K<sub>3</sub>Na<sub>26</sub>, In<sub>48</sub>Na<sub>26</sub>Rb<sub>3</sub>, LaPd<sub>3</sub>S<sub>4</sub>,</p>                                                                                                                                                                                                                                                                                                                                                                                                                                                                                                                                                                                                                                                                                                                                                                          |
| 224 | <p>OPb<sub>2</sub>, Ag<sub>2</sub>O, Ag<sub>2</sub>O<sub>3</sub>, Bi<sub>2</sub>O<sub>3</sub>, OPd<sub>2</sub>, OZr<sub>2</sub>, O<sub>2</sub>Pt,</p>                                                                                                                                                                                                                                                                                                                                                                                                                                                                                                                                                                                                                                                                                                                                                                                                                                                                                                                                                                                                                                                                                                                                                                                                                                                                                                                                                                                                                                                                                                                                                                                                                                                                                                                                                                                                                                                                                                                                                                                                                                                                                                                                                                                                                                                                                                                                                                                                                                                                                            |
| 225 | <p>Br, NbO, O<sub>2</sub>Pb, RbSb, Pt<sub>7</sub>Sb, Ga<sub>16</sub>Pd<sub>7</sub>Zr<sub>6</sub>, Al<sub>4</sub>Sn<sub>3</sub>Sr<sub>11</sub>, Mg<sub>23</sub>Sr<sub>6</sub>, Hf, HgPo, GeLi<sub>2</sub>Zn, LiS, Li, InSb, HgTe, HgSe, K, In<sub>2</sub>LiPd, InPd<sub>2</sub>Y, HgLi<sub>3</sub>, KN, InPt<sub>2</sub>Sc, InPt<sub>2</sub>Zr, LiPd<sub>2</sub>Sn, LiPbPd<sub>2</sub>, KS, InTe, Mo, Li<sub>2</sub>MgPb, InSr<sub>3</sub>, LiMg<sub>2</sub>Si, MoN, Mg<sub>2</sub>Pb, Sb, SY, InP, TeY, SZr, Ti, In<sub>2</sub>Pt, Zr, Li<sub>3</sub>Pd, PSn, Pd, Si, MoP, Y, Sc, Pt, Nb, OZr, NZn, NZr, NTi, NNB, Ta, PZr, NPd, Li<sub>2</sub>SnZn, OTi, NNa, MgP<sub>2</sub>Si, NaS, OTa, Rf, NW,</p>                                                                                                                                                                                                                                                                                                                                                                                                                                                                                                                                                                                                                                                                                                                                                                                                                                                                                                                                                                                                                                                                                                                                                                                                                                                                                                                                                                                                                                                                                                                                                                                                                                                                                                                                                                                                                                                                                                                                          |

Part 13 of all the predicted **Case 3**-TSMs:

|     |                                                                                                                                                                                                                                                                                                                                                                                                                                                                                                                                                                                                                                                                                                                                                                                                                                                                                                                                                                                                                                                                                                                                                                                                                                                                                                                                                                                                                                                                                                                                                                                                                                                                                                                                                                                                                                                                                                                                                                                                                                                                                                                                                                                                                                                                                                                                                                                                                                                                                                                                                                                                                                                                                                                                                                                                                                                                                                                                                                                                                                                                                                                                                                                                                                                                                                                                                                                                                                                                                                                                                                                                                                                                                                                                                                                                                            |
|-----|----------------------------------------------------------------------------------------------------------------------------------------------------------------------------------------------------------------------------------------------------------------------------------------------------------------------------------------------------------------------------------------------------------------------------------------------------------------------------------------------------------------------------------------------------------------------------------------------------------------------------------------------------------------------------------------------------------------------------------------------------------------------------------------------------------------------------------------------------------------------------------------------------------------------------------------------------------------------------------------------------------------------------------------------------------------------------------------------------------------------------------------------------------------------------------------------------------------------------------------------------------------------------------------------------------------------------------------------------------------------------------------------------------------------------------------------------------------------------------------------------------------------------------------------------------------------------------------------------------------------------------------------------------------------------------------------------------------------------------------------------------------------------------------------------------------------------------------------------------------------------------------------------------------------------------------------------------------------------------------------------------------------------------------------------------------------------------------------------------------------------------------------------------------------------------------------------------------------------------------------------------------------------------------------------------------------------------------------------------------------------------------------------------------------------------------------------------------------------------------------------------------------------------------------------------------------------------------------------------------------------------------------------------------------------------------------------------------------------------------------------------------------------------------------------------------------------------------------------------------------------------------------------------------------------------------------------------------------------------------------------------------------------------------------------------------------------------------------------------------------------------------------------------------------------------------------------------------------------------------------------------------------------------------------------------------------------------------------------------------------------------------------------------------------------------------------------------------------------------------------------------------------------------------------------------------------------------------------------------------------------------------------------------------------------------------------------------------------------------------------------------------------------------------------------------------------------|
| 225 | <p>Li<sub>3</sub>Tl, Li<sub>2</sub>MgTl, NTa, OPt, NPt, SSC, In<sub>2</sub>LiPt, PoY, ScSe, LiPd<sub>7</sub>,<br/> SbSn, SeY, P<sub>2</sub>SiZn, NPd<sub>3</sub>, InLi<sub>2</sub>Mg, Pd<sub>2</sub>ScSn, Pd<sub>2</sub>SnY, PbPd<sub>2</sub>Y, RbTe, Pt<sub>2</sub>ScSn, INaO<sub>6</sub>Pb<sub>2</sub>,<br/> LiPt<sub>7</sub>, MoZn<sub>6</sub>, MoZn<sub>7</sub>, Li<sub>23</sub>Sr<sub>6</sub>, In<sub>8</sub>N<sub>7</sub>Sr<sub>19</sub>, AgAuCd<sub>2</sub>, AgAuZn<sub>2</sub>, AgAuCl<sub>6</sub>Cs<sub>2</sub>, AgCs<sub>2</sub>F<sub>6</sub>K, AgN, Ag<sub>2</sub>AlSc,<br/> Ag<sub>2</sub>CdMg, Ag<sub>2</sub>GeLi, Ag<sub>2</sub>InLi, Ag<sub>2</sub>InMg, Ag<sub>2</sub>InSc, Ag<sub>2</sub>InY, Ag<sub>2</sub>LiSn, Al<sub>16</sub>Hf<sub>6</sub>Pt<sub>7</sub>, AlAu<sub>2</sub>Hf, AlAu<sub>2</sub>Ti,<br/> AlTiZr<sub>2</sub>,<br/> Al<sub>2</sub>Au, Al<sub>2</sub>LiPt, Al<sub>2</sub>Pt, AsIn, AsSn, AsTe, AsZr, AuGa<sub>2</sub>, AuIn<sub>2</sub>, AuN, Au<sub>2</sub>HfIn,<br/> Au<sub>2</sub>InTi, Au<sub>2</sub>InZr, B<sub>12</sub>Sc, Al<sub>16</sub>Pt<sub>7</sub>Ti<sub>6</sub>, B<sub>12</sub>Y, B<sub>12</sub>Zr, BBe<sub>2</sub>, BZr, Ba<sub>2</sub>CaO<sub>6</sub>Re, Ba<sub>2</sub>CdO<sub>6</sub>Re, Ag<sub>8</sub>Ca<sub>19</sub>N<sub>7</sub>,<br/> Ba<sub>2</sub>O<sub>6</sub>SbSc, Ba<sub>2</sub>O<sub>6</sub>ReY, Ba<sub>2</sub>O<sub>6</sub>ReZn, BeP<sub>2</sub>Si, Be<sub>2</sub>Si, BiK<sub>3</sub>, BiO<sub>2</sub>, BiSe, BiTe, Br<sub>6</sub>Cs<sub>2</sub>W, Br<sub>6</sub>K<sub>2</sub>Re,<br/> Ba<sub>6</sub>Mg<sub>23</sub>, CAg, CCo, CMO, CNb, CSc, CTi, CRE, CTa, CY, Br<sub>6</sub>Rb<sub>2</sub>W,<br/> Ca<sub>3</sub>In, Ca<sub>3</sub>Tl, Ca<sub>2</sub>O<sub>6</sub>PdW, Ca<sub>6</sub>GeLi, CdGeLi<sub>2</sub>, CdGeP<sub>2</sub>, CdLi<sub>2</sub>Pb, CdN, CdP<sub>2</sub>Si, Cd<sub>3</sub>Y, Cl<sub>6</sub>Cs<sub>2</sub>Mo,<br/> Cl<sub>6</sub>Cs<sub>2</sub>Re, Cl<sub>6</sub>Cs<sub>2</sub>Ta, Cl<sub>6</sub>Cs<sub>2</sub>W, Cl<sub>6</sub>K<sub>2</sub>Mo, Cl<sub>6</sub>K<sub>2</sub>Re, Cl<sub>6</sub>K<sub>2</sub>Ta, Cl<sub>6</sub>MoTl<sub>2</sub>, Cl<sub>6</sub>NbRb<sub>2</sub>, Cl<sub>6</sub>K<sub>2</sub>W, Cs,<br/> Cl<sub>6</sub>Rb<sub>2</sub>W,<br/> Cl<sub>6</sub>Tl<sub>2</sub>W, Cs<sub>2</sub>F<sub>6</sub>KMo, Cs<sub>2</sub>F<sub>6</sub>KTi, Cs<sub>2</sub>F<sub>6</sub>MoTl, Ca<sub>19</sub>In<sub>8</sub>N<sub>7</sub>, F<sub>2</sub>Ti, F<sub>6</sub>KMoRb<sub>2</sub>, F<sub>6</sub>K<sub>2</sub>MoNa, F<sub>6</sub>KMoTl<sub>2</sub>,<br/> F<sub>6</sub>KRb<sub>2</sub>Ti, F<sub>6</sub>MoNaRb<sub>2</sub>,<br/> F<sub>6</sub>K<sub>3</sub>Mo, F<sub>6</sub>MoNa, F<sub>6</sub>MoNaTl<sub>2</sub>, F<sub>6</sub>NaRb<sub>2</sub>Ti, F<sub>6</sub>K<sub>3</sub>W, F<sub>6</sub>TiTi<sub>3</sub>, F<sub>6</sub>TiZr, Ga<sub>2</sub>LiPd, GaPd<sub>2</sub>Sc, Ga<sub>2</sub>Pt,<br/> Ga<sub>2</sub>LiPt,<br/> GeLiMg<sub>2</sub>, GeLiPd<sub>2</sub>, GeLi<sub>2</sub>Pd, GeHgLi<sub>2</sub>, Ga<sub>16</sub>Hf<sub>6</sub>Pd<sub>7</sub>, Ga<sub>16</sub>Pt<sub>7</sub>Zr<sub>6</sub>, Ga<sub>16</sub>Pt<sub>7</sub>Ti<sub>6</sub>, Ga<sub>4</sub>Sn<sub>3</sub>Sr<sub>11</sub>, BBr<sub>20</sub>K<sub>8</sub>Zr<sub>6</sub>,<br/> Ac, AsPa,<br/> AsTh, Au<sub>2</sub>InU, AsU, Au<sub>2</sub>SnU, Au<sub>2</sub>InTh, Ag<sub>2</sub>InLa, CPa, CU, CTh, C<sub>2</sub>U, OU,<br/> OPa, NU, PTh, La, NTh, LaN, SeTh, LaS, PU, LuSe, LuS,<br/> LaSe, LuTe, Th, LuPo, InLuPd<sub>2</sub>, LuPd<sub>2</sub>Sn, SbTh, SbU, LaMg<sub>3</sub>, B<sub>12</sub>Lu, Cl<sub>6</sub>Cs<sub>2</sub>NaU,<br/> Lu<sub>6</sub>Zn<sub>23</sub>, AlLa<sub>6</sub>Mg<sub>22</sub>, Mg<sub>23</sub>Th<sub>6</sub>, Cd<sub>23</sub>Th<sub>6</sub>, NRe, Re, Ba<sub>2</sub>MgO<sub>6</sub>Re, Pt<sub>23</sub>Si<sub>11</sub>U<sub>3</sub>, U,</p> |
| 226 | <p>Be<sub>13</sub>Sr, Be<sub>13</sub>Sb, Be<sub>13</sub>Sc, BaBe<sub>13</sub>, CaZn<sub>13</sub>, Be<sub>13</sub>Ca, Be<sub>13</sub>Zr, Be<sub>13</sub>Hf, LiZn<sub>13</sub>, Be<sub>13</sub>Y,<br/> KZn<sub>13</sub>, NaZn<sub>13</sub>, RbZn<sub>13</sub>, BaZn<sub>13</sub>, BeZn<sub>13</sub>, Cd<sub>13</sub>Cs, Cd<sub>13</sub>K, SrZn<sub>13</sub>, Mo<sub>7</sub>Sn<sub>12</sub>Zn<sub>40</sub>, Be<sub>13</sub>Lu, Be<sub>13</sub>La,<br/> Be<sub>13</sub>Th, LaZn<sub>13</sub>, Cd<sub>13</sub>Rb,</p>                                                                                                                                                                                                                                                                                                                                                                                                                                                                                                                                                                                                                                                                                                                                                                                                                                                                                                                                                                                                                                                                                                                                                                                                                                                                                                                                                                                                                                                                                                                                                                                                                                                                                                                                                                                                                                                                                                                                                                                                                                                                                                                                                                                                                                                                                                                                                                                                                                                                                                                                                                                                                                                                                                                                                                                                                                                                                                                                                                                                                                                                                                                                                                                                                                                                                                           |
| 227 | <p>Ca<sub>2</sub>FO<sub>6</sub>Ta<sub>2</sub>, NZn<sub>3</sub>Zr<sub>3</sub>, NTi<sub>3</sub>Zn<sub>3</sub>, AgBe<sub>2</sub>, Ag<sub>2</sub>Na, Be<sub>2</sub>Nb, B<sub>2</sub>Sc, Au<sub>2</sub>Na, Al<sub>2</sub>Sc, CaPd<sub>2</sub>,<br/> CaLi<sub>2</sub>, Be<sub>2</sub>Ta, CaPt<sub>2</sub>, Al<sub>2</sub>Y, Bi<sub>2</sub>Rb, BaPd<sub>2</sub>, As<sub>2</sub>Na, Au<sub>2</sub>Pb, Au<sub>2</sub>Bi, BaPt<sub>2</sub>, Bi<sub>2</sub>K,<br/> Bi<sub>2</sub>Cs, Ge, AgIn<sub>2</sub>Na<sub>3</sub>, LiZn, InLi, HfW<sub>2</sub>, InNa, Mo<sub>2</sub>Zr, LiPt<sub>2</sub>, HfMo<sub>2</sub>, CsO<sub>6</sub>W<sub>2</sub>,<br/> NaPt<sub>2</sub>, In<sub>24</sub>S<sub>32</sub>, BiF<sub>4</sub>K, Pd<sub>2</sub>Sr, Pt<sub>2</sub>Sr, O<sub>4</sub>PdZn<sub>2</sub>, Sn, Pt<sub>2</sub>Y, YZn<sub>2</sub>, LiO<sub>4</sub>Ti<sub>2</sub>, W<sub>2</sub>Zr,<br/> PdSc<sub>2</sub>, O<sub>7</sub>Pb<sub>2</sub>Sb<sub>2</sub>, S<sub>4</sub>Zr<sub>3</sub>, ILi<sub>7</sub>N<sub>2</sub>, O<sub>6</sub>Pb<sub>2</sub>Sn<sub>2</sub>, NNb<sub>3</sub>Zn<sub>3</sub>, NaO<sub>3</sub>Sb, AlMg<sub>3</sub>Pt<sub>2</sub>, Hf<sub>2</sub>Pt, AuIn<sub>2</sub>Na<sub>3</sub>, O<sub>4</sub>Sb<sub>2</sub>,<br/> O<sub>5</sub>Sb<sub>2</sub>, OPd<sub>2</sub>Zr<sub>4</sub>, HfZn<sub>22</sub>, PtZr<sub>2</sub>, AsPd<sub>5</sub>Sb, Ge<sub>136</sub>K<sub>24</sub>, CZn<sub>3</sub>Zr<sub>3</sub>, Al<sub>18</sub>Mg<sub>3</sub>Ta<sub>2</sub>, CHf<sub>3</sub>Zn<sub>3</sub>, Zn<sub>22</sub>Zr, BMg<sub>8</sub>Pt<sub>4</sub>,<br/> Ba<sub>10</sub>Ga, LuS<sub>2</sub>, Al<sub>2</sub>U, Al<sub>2</sub>Lu, Al<sub>2</sub>La, LaPt<sub>2</sub>, LaMg<sub>2</sub>, Cs<sub>2</sub>O<sub>12</sub>U<sub>4</sub>, Be<sub>22</sub>Re, Al<sub>2</sub>BRe<sub>3</sub>, NRe<sub>2</sub>Zr<sub>4</sub>,<br/> Al<sub>20</sub>LaTi<sub>2</sub>, CTi<sub>3</sub>Zn<sub>3</sub>, CsGe<sub>17</sub>Na<sub>2</sub>, CdLi, Na<sub>2</sub>RbSi<sub>17</sub>,</p>                                                                                                                                                                                                                                                                                                                                                                                                                                                                                                                                                                                                                                                                                                                                                                                                                                                                                                                                                                                                                                                                                                                                                                                                                                                                                                                                                                                                                                                                                                                                                                                                                                                                                                                                                                                                                                                                       |
| 229 | <p>Se, W, Al, Ba, Ca, Bi, AuSb<sub>3</sub>, Cs, Hf, Mg,<br/> Li, Mo, K, Na, Nb, Rb, Sb, Sn, Ti, Ta, Sr,<br/> Tl, Zr, Ca<sub>5</sub>Ge<sub>6</sub>Pd<sub>6</sub>, Ag<sub>8</sub>Ca<sub>3</sub>, O<sub>4</sub>Pt<sub>3</sub>, F<sub>15</sub>Nb<sub>6</sub>, In<sub>7</sub>Pt<sub>3</sub>, Ga<sub>12</sub>PtY<sub>4</sub>, Ga<sub>7</sub>Pd<sub>3</sub>, Al<sub>14</sub>Mg<sub>13</sub>, In<sub>7</sub>Pd<sub>3</sub>,<br/> Ga<sub>7</sub>Pt<sub>3</sub>,</p>                                                                                                                                                                                                                                                                                                                                                                                                                                                                                                                                                                                                                                                                                                                                                                                                                                                                                                                                                                                                                                                                                                                                                                                                                                                                                                                                                                                                                                                                                                                                                                                                                                                                                                                                                                                                                                                                                                                                                                                                                                                                                                                                                                                                                                                                                                                                                                                                                                                                                                                                                                                                                                                                                                                                                                                                                                                                                                                                                                                                                                                                                                                                                                                                                                                                                                                                                                 |

Part 14 of all the predicted **Case 3**-TSMs:

|     |                                                                                                                                                                                                                                                                                                                                                                                                          |
|-----|----------------------------------------------------------------------------------------------------------------------------------------------------------------------------------------------------------------------------------------------------------------------------------------------------------------------------------------------------------------------------------------------------------|
| 229 | Sb <sub>2</sub> Tl <sub>7</sub> , Mo <sub>3</sub> Sb <sub>7</sub> , Ca <sub>17</sub> Hg <sub>9</sub> Li <sub>6</sub> , La, Th, Lu, Cd <sub>4</sub> La <sub>6</sub> Pd <sub>13</sub> , Ga <sub>12</sub> Lu <sub>4</sub> Pd, Ga <sub>12</sub> PdU <sub>4</sub> , La <sub>6</sub> Pd <sub>13</sub> Zn <sub>4</sub> , K <sub>4</sub> O <sub>12</sub> SrU <sub>3</sub> , As <sub>7</sub> Re <sub>3</sub> , U, |
|-----|----------------------------------------------------------------------------------------------------------------------------------------------------------------------------------------------------------------------------------------------------------------------------------------------------------------------------------------------------------------------------------------------------------|

Note that materials in **Cases 1** and **2** can also have band crossings located near the Fermi energy. We list the potential materials with such properties in the following table. Blue and red colors respectively denote **Cases 1** and **2**.

Part 1 of all the predicted materials with band crossings from **Cases 1** or **2**:

TABLE VIII. Materials with band crossings in **Cases 1** or **2** (in blue or red, respectively): The band crossings for the materials listed here could be far from the Fermi energy, and the material might have a continuous direct gap or even a full band gap. One must further examine the actual band dispersions in understanding the prospect of these materials as TSM candidates.

| $SG$      | Materials                                                                                                                                                                                                                                                                                                                                                                                                                                                                                                                                                                                                                                                                                                                                                                                                                                                                                                                                                                                                                                                                                                                                                                                                                                                                                                                                                                                                                                                                                                                                                                                                                                                                                                                                                                                                                                                                                                                                                                                                                                                                                                                                                                                                                                                                                                                                                                                                                                                                                                                                                                                                                                                                                                                                                                                                                                                                                                                                                                                                                                                                                                                                                                                                                                                                                                                                                                                                                                                                                                                                                                                                                                                                                                                                               |
|-----------|---------------------------------------------------------------------------------------------------------------------------------------------------------------------------------------------------------------------------------------------------------------------------------------------------------------------------------------------------------------------------------------------------------------------------------------------------------------------------------------------------------------------------------------------------------------------------------------------------------------------------------------------------------------------------------------------------------------------------------------------------------------------------------------------------------------------------------------------------------------------------------------------------------------------------------------------------------------------------------------------------------------------------------------------------------------------------------------------------------------------------------------------------------------------------------------------------------------------------------------------------------------------------------------------------------------------------------------------------------------------------------------------------------------------------------------------------------------------------------------------------------------------------------------------------------------------------------------------------------------------------------------------------------------------------------------------------------------------------------------------------------------------------------------------------------------------------------------------------------------------------------------------------------------------------------------------------------------------------------------------------------------------------------------------------------------------------------------------------------------------------------------------------------------------------------------------------------------------------------------------------------------------------------------------------------------------------------------------------------------------------------------------------------------------------------------------------------------------------------------------------------------------------------------------------------------------------------------------------------------------------------------------------------------------------------------------------------------------------------------------------------------------------------------------------------------------------------------------------------------------------------------------------------------------------------------------------------------------------------------------------------------------------------------------------------------------------------------------------------------------------------------------------------------------------------------------------------------------------------------------------------------------------------------------------------------------------------------------------------------------------------------------------------------------------------------------------------------------------------------------------------------------------------------------------------------------------------------------------------------------------------------------------------------------------------------------------------------------------------------------------------|
| <b>1</b>  | AlCl <sub>7</sub> Se, Al <sub>2</sub> Li <sub>2</sub> O <sub>12</sub> Si <sub>4</sub> , Al <sub>2</sub> O <sub>4</sub> Pb, AsKSe <sub>2</sub> , Au <sub>2</sub> Te <sub>3</sub> , B <sub>2</sub> Cd <sub>2</sub> O <sub>5</sub> , B <sub>3</sub> BiO <sub>6</sub> , BaBeFO <sub>4</sub> P, BaF <sub>12</sub> Sb <sub>2</sub> , BaI <sub>4</sub> O <sub>12</sub> Pd, BeP <sub>2</sub> , C, CLiNaO <sub>3</sub> , CaGe <sub>2</sub> O <sub>5</sub> , Ca <sub>8</sub> In <sub>3</sub> , Cl <sub>4</sub> Cs <sub>2</sub> Hg, Cl <sub>7</sub> N <sub>2</sub> SbSe <sub>3</sub> , Cs <sub>10</sub> K <sub>6</sub> Pb <sub>36</sub> , Cs <sub>4</sub> Mo <sub>3</sub> O <sub>20</sub> U <sub>3</sub> , F <sub>4</sub> NO <sub>3</sub> RbTe, F <sub>6</sub> Na <sub>2</sub> Si, F <sub>6</sub> Na <sub>2</sub> Ti, Ga <sub>2</sub> O <sub>11</sub> Te <sub>4</sub> , Ga <sub>2</sub> O <sub>4</sub> Pb, IKO <sub>3</sub> , KSbSe <sub>2</sub> , LiN <sub>2</sub> Na <sub>5</sub> , O <sub>11</sub> Sr <sub>3</sub> Te <sub>4</sub> , O <sub>2</sub> Si, O <sub>2</sub> Ti, O <sub>6</sub> Sb <sub>2</sub> W, O <sub>8</sub> Se <sub>2</sub> Te <sub>2</sub> , P <sub>2</sub> PtSi <sub>3</sub> , Pb <sub>4</sub> S <sub>13</sub> Sb <sub>6</sub> , RbS <sub>2</sub> Sb, RbSbSe <sub>2</sub> , S <sub>4</sub> SbTl <sub>3</sub> ,                                                                                                                                                                                                                                                                                                                                                                                                                                                                                                                                                                                                                                                                                                                                                                                                                                                                                                                                                                                                                                                                                                                                                                                                                                                                                                                                                                                                                                                                                                                                                                                                                                                                                                                                                                                                                                                                                                                                                                                                                                                                                                                                                                                                                                                                                                                                                                                                                                |
| <b>2</b>  | Si <sub>2</sub> Te <sub>6</sub> Tl <sub>6</sub> ,                                                                                                                                                                                                                                                                                                                                                                                                                                                                                                                                                                                                                                                                                                                                                                                                                                                                                                                                                                                                                                                                                                                                                                                                                                                                                                                                                                                                                                                                                                                                                                                                                                                                                                                                                                                                                                                                                                                                                                                                                                                                                                                                                                                                                                                                                                                                                                                                                                                                                                                                                                                                                                                                                                                                                                                                                                                                                                                                                                                                                                                                                                                                                                                                                                                                                                                                                                                                                                                                                                                                                                                                                                                                                                       |
| <b>3</b>  | GeO <sub>5</sub> Pb <sub>3</sub> , O <sub>2</sub> Si,                                                                                                                                                                                                                                                                                                                                                                                                                                                                                                                                                                                                                                                                                                                                                                                                                                                                                                                                                                                                                                                                                                                                                                                                                                                                                                                                                                                                                                                                                                                                                                                                                                                                                                                                                                                                                                                                                                                                                                                                                                                                                                                                                                                                                                                                                                                                                                                                                                                                                                                                                                                                                                                                                                                                                                                                                                                                                                                                                                                                                                                                                                                                                                                                                                                                                                                                                                                                                                                                                                                                                                                                                                                                                                   |
| <b>4</b>  | Ag <sub>2</sub> S, AlBaF <sub>5</sub> , AlCl <sub>4</sub> K, AlCl <sub>6</sub> I, Al <sub>2</sub> O <sub>12</sub> W <sub>3</sub> , Al <sub>2</sub> O <sub>4</sub> Sr, Al <sub>7</sub> S <sub>12</sub> Tl <sub>3</sub> , AsCsF <sub>4</sub> , AsF <sub>12</sub> LiXe <sub>3</sub> , AsLiMoO <sub>6</sub> , AsO <sub>4</sub> TlZn, AsS <sub>2</sub> , As <sub>2</sub> Ba <sub>2</sub> Se <sub>5</sub> , As <sub>2</sub> CdHg <sub>4</sub> I <sub>4</sub> , As <sub>2</sub> Cs <sub>2</sub> Se <sub>9</sub> Sn, As <sub>2</sub> K <sub>3</sub> LaO <sub>8</sub> , As <sub>2</sub> O <sub>3</sub> , As <sub>2</sub> Pb <sub>2</sub> S <sub>5</sub> , As <sub>8</sub> Pb <sub>8</sub> S <sub>20</sub> , AuBrF <sub>6</sub> , AuNa <sub>5</sub> Se <sub>12</sub> , B <sub>4</sub> GeO <sub>9</sub> Rb <sub>2</sub> , BaMo <sub>2</sub> O <sub>9</sub> Te, BaMo <sub>3</sub> O <sub>10</sub> , BaNa <sub>2</sub> O <sub>6</sub> Si <sub>2</sub> , BaO <sub>9</sub> TeW <sub>2</sub> , Ba <sub>2</sub> Cl <sub>7</sub> Sc, Ba <sub>3</sub> P <sub>4</sub> Sn <sub>2</sub> , BiCl <sub>5</sub> Hg <sub>4</sub> S <sub>2</sub> , BiInS <sub>3</sub> , BiKP <sub>2</sub> S <sub>6</sub> , BiKP <sub>2</sub> Se <sub>6</sub> , BiP <sub>2</sub> S <sub>6</sub> Tl, BiPd, Bi <sub>4</sub> Br <sub>2</sub> O <sub>5</sub> , Bi <sub>4</sub> I <sub>2</sub> O <sub>5</sub> , Br <sub>10</sub> Re <sub>2</sub> Te <sub>6</sub> , Br <sub>4</sub> K <sub>2</sub> Zn, C <sub>2</sub> F <sub>4</sub> Te <sub>2</sub> , C <sub>2</sub> N <sub>2</sub> S <sub>9</sub> , CaGe <sub>2</sub> Pt <sub>2</sub> , CaN <sub>2</sub> O <sub>2</sub> Si <sub>2</sub> , CaO <sub>3</sub> Te, Ca <sub>2</sub> Nb <sub>2</sub> O <sub>7</sub> , Ca <sub>4</sub> FN <sub>2</sub> NbO <sub>17</sub> Si <sub>4</sub> Zr, Cd <sub>2</sub> O <sub>12</sub> Rb <sub>2</sub> S <sub>3</sub> , ClFO <sub>7</sub> Pb <sub>2</sub> Se <sub>2</sub> Ti, ClHg <sub>2</sub> O <sub>12</sub> Rb <sub>3</sub> S <sub>3</sub> , ClHg <sub>2</sub> O <sub>12</sub> S <sub>3</sub> Tl <sub>3</sub> , ClNbO <sub>8</sub> Pb <sub>2</sub> Se <sub>2</sub> , Cl <sub>2</sub> N <sub>2</sub> S <sub>3</sub> , Cl <sub>6</sub> Hg <sub>6</sub> In <sub>2</sub> P <sub>3</sub> , Cs <sub>2</sub> HgI <sub>4</sub> , Cs <sub>4</sub> O <sub>3</sub> Pb, F <sub>12</sub> Sb <sub>2</sub> Xe, F <sub>21</sub> Rb <sub>5</sub> Zr <sub>4</sub> , F <sub>2</sub> O <sub>7</sub> Te, F <sub>3</sub> KOTe, F <sub>7</sub> SnY, GeKS <sub>4</sub> Y, GeN <sub>2</sub> OSi, GeO <sub>5</sub> Pb <sub>3</sub> , HfNO <sub>3</sub> Ta, HgI <sub>2</sub> O <sub>6</sub> , Hg <sub>3</sub> O <sub>10</sub> SeTe <sub>2</sub> , Hg <sub>3</sub> O <sub>10</sub> Se <sub>3</sub> , ILiMoO <sub>6</sub> , I <sub>4</sub> O <sub>12</sub> Zn <sub>2</sub> , I <sub>4</sub> Tl <sub>2</sub> Zn, InK <sub>2</sub> LiMo <sub>3</sub> O <sub>12</sub> , InP <sub>2</sub> S <sub>6</sub> Tl, In <sub>6</sub> Se <sub>7</sub> , KLiO <sub>5</sub> Si <sub>2</sub> , KP <sub>2</sub> S <sub>6</sub> Sb, KP <sub>2</sub> SbSe <sub>6</sub> , KS <sub>4</sub> SiY, K <sub>2</sub> Mo <sub>3</sub> Se <sub>18</sub> , K <sub>2</sub> O <sub>15</sub> Si <sub>6</sub> Ti, MoO <sub>2</sub> , MoO <sub>7</sub> TeZn <sub>2</sub> , NaP <sub>2</sub> S <sub>6</sub> Sb, Na <sub>2</sub> O <sub>8</sub> Si <sub>3</sub> Zn, Na <sub>2</sub> Se <sub>9</sub> Ti <sub>2</sub> , O <sub>11</sub> P <sub>2</sub> W <sub>2</sub> , O <sub>15</sub> Pb <sub>4</sub> SSi <sub>3</sub> Zn <sub>2</sub> , O <sub>5</sub> Te <sub>2</sub> , P <sub>2</sub> PtSi <sub>2</sub> , P <sub>2</sub> S <sub>6</sub> SbTl, P <sub>2</sub> SbSe <sub>6</sub> Tl, P <sub>2</sub> Se <sub>6</sub> TlY, P <sub>4</sub> S <sub>5</sub> , SbSe <sub>2</sub> Tl, Se, Te, |
| <b>5</b>  | AgS <sub>2</sub> Sb, Ag <sub>2</sub> Mo <sub>3</sub> O <sub>16</sub> Te <sub>3</sub> , Al <sub>17</sub> Mo <sub>4</sub> , AlAs <sub>2</sub> LiO <sub>7</sub> , Al <sub>4</sub> O <sub>15</sub> Sr <sub>6</sub> Y <sub>2</sub> , Al <sub>4</sub> P <sub>6</sub> S <sub>18</sub> , Al <sub>6</sub> F <sub>21</sub> NaRb <sub>2</sub> , AsPd <sub>5</sub> , As <sub>2</sub> GaLiO <sub>7</sub> , As <sub>2</sub> LiO <sub>7</sub> Sc, As <sub>2</sub> Mo, As <sub>2</sub> NaO <sub>7</sub> Sc, As <sub>2</sub> Nb, As <sub>2</sub> Ta, AuCsI <sub>4</sub> O <sub>12</sub> , Au <sub>4</sub> KO <sub>12</sub> , Au <sub>4</sub> O <sub>12</sub> Rb, BB <sub>2</sub> FO <sub>3</sub> , BB <sub>2</sub> F <sub>2</sub> KO <sub>3</sub> , BB <sub>2</sub> F <sub>2</sub> O <sub>3</sub> Rb, B <sub>3</sub> BiO <sub>6</sub> , Bi <sub>10</sub> Mo <sub>3</sub> O <sub>24</sub> , Bi <sub>14</sub> Mo <sub>5</sub> O <sub>36</sub> , BiO <sub>3</sub> Sc, Bi <sub>7</sub> F <sub>11</sub> O <sub>5</sub> , BrHg <sub>3</sub> ITe <sub>2</sub> , Br <sub>2</sub> NbO, Br <sub>4</sub> NbOTl, CCaO <sub>3</sub> , CK <sub>4</sub> O <sub>4</sub> , CLi <sub>4</sub> O <sub>4</sub> , CNa <sub>4</sub> O <sub>4</sub> , C <sub>3</sub> AsN <sub>3</sub> , CaO <sub>7</sub> Si <sub>2</sub> Zr, CdNa <sub>2</sub> S <sub>4</sub> Sn, GaNbO <sub>4</sub> , Ga <sub>2</sub> Ge <sub>3</sub> O <sub>10</sub> Rb <sub>2</sub> , GePd <sub>5</sub> , Ge <sub>2</sub> Hg <sub>3</sub> K <sub>2</sub> S <sub>8</sub> , Ge <sub>4</sub> O <sub>9</sub> Pb, Ge <sub>9</sub> Li <sub>4</sub> O <sub>20</sub> , Hg <sub>2</sub> P <sub>2</sub> S <sub>7</sub> , I <sub>2</sub> NbO, I <sub>3</sub> NbO, InKP <sub>2</sub> S <sub>7</sub> , LiN <sub>2</sub> Na <sub>5</sub> , MoO <sub>4</sub> Tl <sub>2</sub> , Mo <sub>3</sub> Na <sub>2</sub> O <sub>16</sub> Te <sub>3</sub> , Na <sub>4</sub> O <sub>9</sub> Si <sub>3</sub> Sr, Nb <sub>2</sub> O <sub>5</sub> , O <sub>14</sub> PtSi <sub>2</sub> Sr <sub>8</sub> , O <sub>2</sub> Si, O <sub>5</sub> Ta <sub>2</sub> , P <sub>2</sub> S <sub>7</sub> ScTl, PbS, Pb <sub>3</sub> Pd <sub>5</sub> , Po, Re <sub>2</sub> Sc <sub>3</sub> Si <sub>3</sub> ,                                                                                                                                                                                                                                                                                                                                                                                                                                                                                                                                                                                                                                                                                                                                                                                                                                                                                                                                                                                                                                                                                                                                                                                                                                                                                                                                                                                                                                                                                                                                                                |
| <b>6</b>  | BO <sub>3</sub> Y, BaBe <sub>2</sub> O <sub>7</sub> Si <sub>2</sub> , CGa <sub>3</sub> N <sub>3</sub> Si, C <sub>3</sub> GaN <sub>3</sub> Si, CsIO <sub>3</sub> , CsI <sub>4</sub> Li <sub>3</sub> , Li <sub>3</sub> N <sub>2</sub> Na <sub>3</sub> , Li <sub>5</sub> N <sub>2</sub> Na, NO <sub>2</sub> SiY, NbSe <sub>3</sub> , O <sub>2</sub> Si,                                                                                                                                                                                                                                                                                                                                                                                                                                                                                                                                                                                                                                                                                                                                                                                                                                                                                                                                                                                                                                                                                                                                                                                                                                                                                                                                                                                                                                                                                                                                                                                                                                                                                                                                                                                                                                                                                                                                                                                                                                                                                                                                                                                                                                                                                                                                                                                                                                                                                                                                                                                                                                                                                                                                                                                                                                                                                                                                                                                                                                                                                                                                                                                                                                                                                                                                                                                                    |
| <b>7</b>  | Ag <sub>7</sub> S <sub>6</sub> Ta, CLi <sub>4</sub> O <sub>4</sub> , Ca <sub>14</sub> F <sub>2</sub> Nb <sub>2</sub> O <sub>34</sub> Si <sub>8</sub> , HgO <sub>4</sub> S, O <sub>3</sub> W,                                                                                                                                                                                                                                                                                                                                                                                                                                                                                                                                                                                                                                                                                                                                                                                                                                                                                                                                                                                                                                                                                                                                                                                                                                                                                                                                                                                                                                                                                                                                                                                                                                                                                                                                                                                                                                                                                                                                                                                                                                                                                                                                                                                                                                                                                                                                                                                                                                                                                                                                                                                                                                                                                                                                                                                                                                                                                                                                                                                                                                                                                                                                                                                                                                                                                                                                                                                                                                                                                                                                                            |
| <b>8</b>  | B <sub>3</sub> Ca <sub>4</sub> LaO <sub>10</sub> , N <sub>2</sub> Re,                                                                                                                                                                                                                                                                                                                                                                                                                                                                                                                                                                                                                                                                                                                                                                                                                                                                                                                                                                                                                                                                                                                                                                                                                                                                                                                                                                                                                                                                                                                                                                                                                                                                                                                                                                                                                                                                                                                                                                                                                                                                                                                                                                                                                                                                                                                                                                                                                                                                                                                                                                                                                                                                                                                                                                                                                                                                                                                                                                                                                                                                                                                                                                                                                                                                                                                                                                                                                                                                                                                                                                                                                                                                                   |
| <b>9</b>  | Al <sub>15</sub> La <sub>3</sub> O <sub>37</sub> Ti <sub>5</sub> , N <sub>3</sub> Na <sub>4</sub> Re,                                                                                                                                                                                                                                                                                                                                                                                                                                                                                                                                                                                                                                                                                                                                                                                                                                                                                                                                                                                                                                                                                                                                                                                                                                                                                                                                                                                                                                                                                                                                                                                                                                                                                                                                                                                                                                                                                                                                                                                                                                                                                                                                                                                                                                                                                                                                                                                                                                                                                                                                                                                                                                                                                                                                                                                                                                                                                                                                                                                                                                                                                                                                                                                                                                                                                                                                                                                                                                                                                                                                                                                                                                                   |
| <b>11</b> | AgBi <sub>2</sub> ClS <sub>3</sub> , AgBi <sub>2</sub> ClSe <sub>3</sub> , AgBr, AgCl, AgHfRbTe <sub>3</sub> , AgI, Ag <sub>2</sub> Cs <sub>3</sub> S <sub>8</sub> Sb <sub>3</sub> , Ag <sub>2</sub> O <sub>6</sub> Te <sub>2</sub> , Ag <sub>8</sub> BaS <sub>5</sub> , AlAs <sub>3</sub> Cl <sub>4</sub> S <sub>5</sub> , AlAu, AlCl <sub>6</sub> NS <sub>2</sub> , AlCs <sub>6</sub> Sb <sub>3</sub> , AlF <sub>4</sub> K, AlI <sub>4</sub> In, AlRb <sub>6</sub> Sb <sub>3</sub> , Al <sub>2</sub> As <sub>3</sub> K <sub>3</sub> , Al <sub>2</sub> CaO <sub>4</sub> , Al <sub>2</sub> Na <sub>7</sub> Sb <sub>5</sub> , Al <sub>3</sub> F <sub>12</sub> NaRb <sub>2</sub> , AsAuK <sub>2</sub> S <sub>4</sub> , AsCs <sub>2</sub> NaO <sub>4</sub> , AsF <sub>5</sub> N <sub>4</sub> S <sub>4</sub> , AsF <sub>8</sub> Sb, AsO <sub>4</sub> Sb, As <sub>2</sub> Te <sub>3</sub> , As <sub>3</sub> BrO <sub>6</sub> Pb <sub>2</sub> , As <sub>3</sub> Cs <sub>6</sub> In, As <sub>3</sub> F <sub>6</sub> SbSe <sub>4</sub> , As <sub>4</sub> S <sub>5</sub> , AuK <sub>2</sub> PS <sub>4</sub> , AuPS <sub>4</sub> Tl <sub>2</sub> , AuSr, Au <sub>2</sub> BaSb <sub>2</sub> , BB <sub>2</sub> Li, BBr <sub>3</sub> P <sub>4</sub> S <sub>3</sub> , BS <sub>3</sub> Tl <sub>3</sub> , BSe <sub>3</sub> Tl <sub>3</sub> , BaBi <sub>2</sub> Pd <sub>2</sub> , BaIn <sub>2</sub> P <sub>2</sub> , BaNaO <sub>7</sub> ScSi <sub>2</sub> , BaO <sub>10</sub> Sc <sub>2</sub> Si <sub>3</sub> , BaO <sub>10</sub> Si <sub>3</sub> Y <sub>2</sub> , BaO <sub>3</sub> Se,                                                                                                                                                                                                                                                                                                                                                                                                                                                                                                                                                                                                                                                                                                                                                                                                                                                                                                                                                                                                                                                                                                                                                                                                                                                                                                                                                                                                                                                                                                                                                                                                                                                                                                                                                                                                                                                                                                                                                                                                                                                                                                                                                                                  |

Part 2 of all the predicted materials with band crossings from **Cases 1 or 2**:

|    |                                                                                                                                                                                                                                                                                                                                                                                                                                                                                                                                                                                                                                                                                                                                                                                                                                                                                                                                                                                                                                                                                                                                                                                                                                                                                                                                                                                                                                                                                                                                                                                                                                                                                                                                                                                                                                                                                                                                                                                                                                                                                                                                                                                                                                                                                                                                                                                                                                                                                                                                                                                                                                                                                                                                                                                                                                                                                                                                                                                                                                                                                                                                                                                                                                                                                                                                                                                                                                                                                                                                                                                                                                                                                                                                                                                                                                                                                                                                                                                                                                                                                                                                                                                                                                                                                                                                                                                                                                                  |
|----|--------------------------------------------------------------------------------------------------------------------------------------------------------------------------------------------------------------------------------------------------------------------------------------------------------------------------------------------------------------------------------------------------------------------------------------------------------------------------------------------------------------------------------------------------------------------------------------------------------------------------------------------------------------------------------------------------------------------------------------------------------------------------------------------------------------------------------------------------------------------------------------------------------------------------------------------------------------------------------------------------------------------------------------------------------------------------------------------------------------------------------------------------------------------------------------------------------------------------------------------------------------------------------------------------------------------------------------------------------------------------------------------------------------------------------------------------------------------------------------------------------------------------------------------------------------------------------------------------------------------------------------------------------------------------------------------------------------------------------------------------------------------------------------------------------------------------------------------------------------------------------------------------------------------------------------------------------------------------------------------------------------------------------------------------------------------------------------------------------------------------------------------------------------------------------------------------------------------------------------------------------------------------------------------------------------------------------------------------------------------------------------------------------------------------------------------------------------------------------------------------------------------------------------------------------------------------------------------------------------------------------------------------------------------------------------------------------------------------------------------------------------------------------------------------------------------------------------------------------------------------------------------------------------------------------------------------------------------------------------------------------------------------------------------------------------------------------------------------------------------------------------------------------------------------------------------------------------------------------------------------------------------------------------------------------------------------------------------------------------------------------------------------------------------------------------------------------------------------------------------------------------------------------------------------------------------------------------------------------------------------------------------------------------------------------------------------------------------------------------------------------------------------------------------------------------------------------------------------------------------------------------------------------------------------------------------------------------------------------------------------------------------------------------------------------------------------------------------------------------------------------------------------------------------------------------------------------------------------------------------------------------------------------------------------------------------------------------------------------------------------------------------------------------------------------------------------|
| 11 | <p>BaO<sub>3</sub>Te, BaPd<sub>2</sub>S<sub>4</sub>, BaS<sub>3</sub>Sn<sub>2</sub>, <b>BaSb<sub>2</sub></b>, Ba<sub>2</sub>BrP<sub>7</sub>, Ba<sub>2</sub>ClF<sub>7</sub>Zn<sub>2</sub>, Ba<sub>2</sub>ClP<sub>7</sub>, Ba<sub>2</sub>GaGeN, Ba<sub>2</sub>GeSe<sub>2</sub>Te<sub>2</sub>, Ba<sub>2</sub>GeSe<sub>4</sub>, Ba<sub>2</sub>IP<sub>7</sub>, Ba<sub>2</sub>LiN<sub>4</sub>Re, Ba<sub>2</sub>Se<sub>4</sub>Si, Ba<sub>2</sub>SiTe<sub>4</sub>, Ba<sub>3</sub>Bi<sub>6</sub>PbSe<sub>13</sub>, <b>Ba<sub>3</sub>Ge<sub>2</sub>N<sub>2</sub></b>, Ba<sub>4</sub>Cl<sub>2</sub>N<sub>4</sub>W, Ba<sub>4</sub>Ga<sub>2</sub>S<sub>7</sub>, Bi, BiCdClO<sub>2</sub>, Bi<sub>2</sub>Ga<sub>2</sub>In<sub>4</sub>S<sub>12</sub>, Bi<sub>2</sub>In<sub>4</sub>S<sub>9</sub>, <b>Bi<sub>2</sub>Pd<sub>2</sub>Sr</b>, Bi<sub>6</sub>Se<sub>13</sub>Sr<sub>4</sub>, <b>Bi<sub>7</sub>In<sub>3</sub>Pb<sub>4</sub>S<sub>18</sub></b>, Bi<sub>8</sub>Cs<sub>2</sub>Se<sub>13</sub>, Bi<sub>8</sub>Rb<sub>2</sub>Se<sub>13</sub>, Br<sub>3</sub>GaLi, Br<sub>3</sub>Nb<sub>3</sub>Se<sub>10</sub>, Br<sub>4</sub>K<sub>2</sub>Zn, Br<sub>5</sub>CsHg<sub>2</sub>, Br<sub>9</sub>TaTe, CAgNO, CAg<sub>2</sub>O<sub>3</sub>, CaF<sub>3</sub>K, <b>CaSb<sub>2</sub></b>, Ca<sub>2</sub>O<sub>12</sub>Si<sub>4</sub>Zr, Ca<sub>5</sub>N<sub>4</sub>O<sub>2</sub>W, Ca<sub>7</sub>N<sub>9</sub>NbSi<sub>2</sub>, CdCs<sub>2</sub>I<sub>4</sub>, Cl<sub>12</sub>Re<sub>2</sub>S, Cl<sub>13</sub>PRE<sub>2</sub>, ClF<sub>5</sub>NRe, ClIn<sub>5</sub>S<sub>5</sub>, ClIn<sub>5</sub>Se<sub>5</sub>, ClKO<sub>3</sub>, Cl<sub>2</sub>O<sub>11</sub>Te<sub>6</sub>, Cl<sub>3</sub>GeRb, Cl<sub>3</sub>N<sub>3</sub>S<sub>3</sub>, Cl<sub>3</sub>Nb<sub>3</sub>Se<sub>10</sub>, Cl<sub>6</sub>Pd<sub>6</sub>S<sub>6</sub>, <b>Cl<sub>7</sub>CsTi<sub>2</sub></b>, Cl<sub>7</sub>Nb<sub>3</sub>Se<sub>5</sub>, Cs<sub>2</sub>HgI<sub>4</sub>, Cs<sub>3</sub>I<sub>4</sub>Li, Cs<sub>6</sub>GaSb<sub>3</sub>, F<sub>11</sub>In<sub>3</sub>Rb<sub>2</sub>, F<sub>14</sub>Sb<sub>4</sub>, FKO<sub>2</sub>S, FKO<sub>2</sub>Se, FLiO<sub>4</sub>SiSi<sub>2</sub>, FO<sub>3</sub>SeY, F<sub>4</sub>MgSr, F<sub>7</sub>In<sub>2</sub>K, F<sub>7</sub>PbTa, F<sub>7</sub>SrTa, F<sub>8</sub>LiNaY<sub>2</sub>, GaGeNSr<sub>2</sub>, GaGe<sub>2</sub>Na<sub>5</sub>, Ga<sub>3</sub>Li, <b>Ga<sub>5</sub>Pt</b>, <b>GeHfPd</b>, GeS<sub>4</sub>Sr<sub>2</sub>, Ge<sub>2</sub>N<sub>2</sub>Sr<sub>3</sub>, Ge<sub>4</sub>K<sub>4</sub>Se<sub>10</sub>, <b>HfS<sub>3</sub></b>, HfSe<sub>3</sub>Tl<sub>2</sub>, HfTe<sub>3</sub>, I<sub>2</sub>Zr, I<sub>9</sub>Re<sub>3</sub>, InNa<sub>5</sub>S<sub>4</sub>, In<sub>2</sub>S<sub>7</sub>Sn<sub>3</sub>, In<sub>5</sub>S<sub>6</sub>Tl, In<sub>5</sub>S<sub>7</sub>Tl, In<sub>5</sub>Se<sub>7</sub>Tl, In<sub>6</sub>S<sub>7</sub>, In<sub>6</sub>Se<sub>7</sub>, K<sub>2</sub>O<sub>5</sub>S<sub>2</sub>, K<sub>4</sub>P<sub>8</sub>Te<sub>4</sub>, LaS<sub>3</sub>Y, LiN<sub>4</sub>ReSr<sub>2</sub>, Li<sub>2</sub>O<sub>7</sub>Ti<sub>3</sub>, <b>Li<sub>4</sub>S<sub>4</sub>Si</b>, <b>MgZn<sub>2</sub></b>, MoO<sub>3</sub>, <b>MoTe<sub>2</sub></b>, Mo<sub>2</sub>O<sub>9</sub>Zn<sub>3</sub>, <b>Mo<sub>2</sub>S<sub>3</sub></b>, N<sub>2</sub>O<sub>4</sub>, NaNb<sub>3</sub>O<sub>16</sub>Te<sub>4</sub>, Na<sub>2</sub>O<sub>7</sub>Ti<sub>3</sub>, Na<sub>2</sub>P<sub>2</sub>S<sub>6</sub>, <b>NbPt<sub>3</sub></b>, Nb<sub>2</sub>P<sub>2</sub>Rb<sub>2</sub>S<sub>11</sub>, <b>Nb<sub>2</sub>Se<sub>3</sub></b>, O<sub>2</sub>Te, O<sub>3</sub>P<sub>4</sub>S<sub>6</sub>, O<sub>3</sub>PbS, O<sub>3</sub>PbSe, O<sub>3</sub>Pb<sub>2</sub>, O<sub>3</sub>PdSe, O<sub>3</sub>SeSr, O<sub>3</sub>Tl<sub>4</sub>, O<sub>6</sub>P<sub>4</sub>, O<sub>6</sub>Pb<sub>3</sub>S, O<sub>7</sub>PbTi<sub>3</sub>, O<sub>7</sub>Si<sub>2</sub>Y<sub>2</sub>, O<sub>9</sub>S<sub>2</sub>Zn<sub>3</sub>, P<sub>4</sub>S<sub>5</sub>, P<sub>4</sub>S<sub>6</sub>, P<sub>5</sub>Y, PbS, Pb<sub>9</sub>Rb<sub>4</sub>, <b>Pt<sub>3</sub>Ta</b>, <b>Pt<sub>6</sub>Si<sub>5</sub></b>, S<sub>3</sub>Ti, S<sub>3</sub>Tl<sub>2</sub>Zr, S<sub>3</sub>Y<sub>2</sub>, S<sub>4</sub>SiSi<sub>2</sub>, S<sub>7</sub>Sb<sub>4</sub>Sn, Sb, <b>Sb<sub>2</sub>Sr</b>, <b>Se<sub>3</sub>Ta</b>, <b>Se<sub>3</sub>Ta<sub>2</sub></b>, <b>Se<sub>3</sub>Zr</b>, <b>Sn<sub>2</sub>SrZn<sub>2</sub></b>, <b>Te<sub>3</sub>Zr</b>,</p> |
| 13 | <p>Al<sub>2</sub>Cl<sub>8</sub>Sr, <b>Br<sub>3</sub>NbSe</b>, <b>Br<sub>6</sub>Nb<sub>2</sub>Se<sub>2</sub></b>, <b>Cl<sub>3</sub>NbSe</b>, <b>FMO<sub>2</sub>O<sub>7</sub>Y</b>, I<sub>4</sub>Zr, <b>I<sub>6</sub>Nb<sub>2</sub>Te<sub>2</sub></b>,</p>                                                                                                                                                                                                                                                                                                                                                                                                                                                                                                                                                                                                                                                                                                                                                                                                                                                                                                                                                                                                                                                                                                                                                                                                                                                                                                                                                                                                                                                                                                                                                                                                                                                                                                                                                                                                                                                                                                                                                                                                                                                                                                                                                                                                                                                                                                                                                                                                                                                                                                                                                                                                                                                                                                                                                                                                                                                                                                                                                                                                                                                                                                                                                                                                                                                                                                                                                                                                                                                                                                                                                                                                                                                                                                                                                                                                                                                                                                                                                                                                                                                                                                                                                                                         |
| 14 | <p>Ag<sub>2</sub>HgS<sub>2</sub>, Ag<sub>2</sub>O<sub>3</sub>S, <b>Ag<sub>2</sub>Te</b>, AlBr<sub>3</sub>, AlCaF<sub>5</sub>, AlCl<sub>4</sub>Li, AlI<sub>3</sub>, AlNa<sub>3</sub>S<sub>3</sub>, Al<sub>2</sub>B<sub>2</sub>Cs<sub>2</sub>O<sub>7</sub>, Al<sub>2</sub>Br<sub>6</sub>, Al<sub>2</sub>Br<sub>6</sub>N<sub>2</sub>Se<sub>2</sub>, Al<sub>2</sub>Cl<sub>6</sub>OSn, AsBaKSe<sub>3</sub>, AsISe, <b>AsLuSe</b>, AsNaS<sub>2</sub>, <b>AsSY</b>, <b>AsSeY</b>, As<sub>2</sub>F<sub>12</sub>Hg<sub>3</sub>, <b>As<sub>2</sub>F<sub>8</sub>O<sub>2</sub>Rb<sub>2</sub></b>, <b>As<sub>2</sub>Pt<sub>2</sub>Sr</b>, As<sub>2</sub>S<sub>3</sub>, As<sub>2</sub>Se<sub>3</sub>, AuCl<sub>3</sub>, AuTe, <b>AuI<sub>4</sub>Li</b>, AuNaSe<sub>2</sub>, BN, B<sub>2</sub>Mg<sub>2</sub>O<sub>5</sub>, BaBeLa<sub>2</sub>O<sub>5</sub>, BaGa<sub>2</sub>Pt<sub>2</sub>, BaKSbSe<sub>3</sub>, <b>BaNb<sub>2</sub>O<sub>6</sub></b>, BaP<sub>2</sub>, BaS<sub>2</sub>Sn, Ba<sub>2</sub>Br<sub>5</sub>Cs, Ba<sub>2</sub>ClCs<sub>4</sub>Sn, <b>Ba<sub>3</sub>P<sub>14</sub></b>, <b>BeLiN</b>, Bi, BiBr<sub>3</sub>, BrInTe, <b>Br<sub>2</sub>O<sub>5</sub>Sb<sub>4</sub></b>, Br<sub>3</sub>Ga, Br<sub>6</sub>Hg<sub>3</sub>Se<sub>2</sub>Zr, CF<sub>4</sub>, CKNSe, C<sub>2</sub>Ca, C<sub>2</sub>Cl<sub>4</sub>S<sub>2</sub>, C<sub>7</sub>Y<sub>4</sub>, Cd<sub>2</sub>K<sub>2</sub>O<sub>3</sub>, Cl<sub>2</sub>MgO<sub>8</sub>, Cl<sub>2</sub>OS, <b>Cl<sub>2</sub>O<sub>5</sub>Sb<sub>4</sub></b>, <b>Cl<sub>2</sub>Te<sub>3</sub></b>, <b>Cl<sub>4</sub>Hg<sub>4</sub>I<sub>2</sub>S</b>, Cl<sub>4</sub>IK, <b>Cl<sub>6</sub>Hg<sub>3</sub>S<sub>2</sub>Zr</b>, <b>FGaO<sub>3</sub>Te</b>, FMO<sub>4</sub>Y, FO<sub>3</sub>SeY, F<sub>4</sub>Zr, GaI<sub>3</sub>, <b>HfO<sub>2</sub></b>, Hg<sub>2</sub>MoO<sub>4</sub>, Hg<sub>2</sub>O<sub>3</sub>Se, InTe, lLiO<sub>4</sub>, I<sub>2</sub>Pd, I<sub>2</sub>Pt, I<sub>3</sub>Sb, I<sub>5</sub>Nb, I<sub>6</sub>In<sub>2</sub>, KNaO<sub>2</sub>Zn, KPS<sub>4</sub>Sn, <b>K<sub>2</sub>O<sub>7</sub>W<sub>2</sub></b>, K<sub>2</sub>Se<sub>3</sub>Te, <b>LaSbSe</b>, LiP, Lu<sub>2</sub>O<sub>5</sub>Si, <b>NOTa</b>, Na<sub>2</sub>O<sub>3</sub>Zn<sub>2</sub>, Na<sub>2</sub>Se<sub>3</sub>Sn, <b>O<sub>2</sub>Ti</b>, <b>O<sub>3</sub>Pb<sub>2</sub></b>, <b>O<sub>3</sub>S</b>, O<sub>6</sub>Se<sub>2</sub>Ti, <b>O<sub>7</sub>P<sub>2</sub>Sn<sub>2</sub></b>, <b>O<sub>7</sub>Rb<sub>2</sub>W<sub>2</sub></b>, <b>O<sub>7</sub>Si<sub>2</sub>Y<sub>2</sub></b>, <b>Rb<sub>2</sub>S<sub>7</sub>Sb<sub>4</sub></b>, <b>Rb<sub>2</sub>Te<sub>3</sub>Zr</b>,</p>                                                                                                                                                                                                                                                                                                                                                                                                                                                                                                                                                                                                                                                                                                                                                                                                                                                                                                                                                                                                                                                                                                                                                                                                                                                                                                                                                                                                                                                                                                                                                                                                                                                                                                                                                                                                                    |
| 15 | <p>AllaO<sub>3</sub>, B<sub>4</sub>O<sub>8</sub>U, Ba<sub>2</sub>Re<sub>6</sub>S<sub>11</sub>, Be<sub>2</sub>La<sub>2</sub>O<sub>5</sub>, Br<sub>6</sub>Cs<sub>3</sub>La, Br<sub>6</sub>In<sub>2</sub>Th, C<sub>2</sub>Br<sub>10</sub>La<sub>6</sub>, C<sub>3</sub>K<sub>4</sub>O<sub>11</sub>U, Cl<sub>11</sub>NRe<sub>2</sub>S<sub>2</sub>, ClLa<sub>3</sub>O<sub>8</sub>Si<sub>2</sub>, ClLa<sub>3</sub>S<sub>8</sub>Si<sub>2</sub>, Cl<sub>5</sub>Pa, <b>Cl<sub>6</sub>ReTe<sub>8</sub></b>, Cs<sub>2</sub>F<sub>7</sub>Pa, Cs<sub>2</sub>Re<sub>3</sub>Se<sub>6</sub>, Cs<sub>4</sub>Re<sub>6</sub>S<sub>13</sub>, Cs<sub>4</sub>Re<sub>6</sub>Se<sub>13</sub>, F<sub>3</sub>La<sub>2</sub>LiO<sub>8</sub>S<sub>2</sub>, F<sub>4</sub>LiLu, F<sub>7</sub>K<sub>2</sub>Pa, F<sub>7</sub>PaRb<sub>2</sub>, GaLa<sub>2</sub>N<sub>3</sub>, lLa<sub>3</sub>S<sub>8</sub>Si<sub>2</sub>, I<sub>4</sub>U, InS<sub>2</sub>Tl, In<sub>2</sub>Na<sub>6</sub>S<sub>6</sub>, In<sub>2</sub>Te<sub>5</sub>, KNaO<sub>3</sub>Ti, KO<sub>2</sub>Sb, KO<sub>8</sub>W<sub>2</sub>Y, KS<sub>2</sub>Sb, K<sub>2</sub>MoO<sub>2</sub>S<sub>2</sub>, K<sub>2</sub>Mo<sub>3</sub>O<sub>10</sub>, K<sub>2</sub>Mo<sub>3</sub>O<sub>12</sub>Th, K<sub>2</sub>O<sub>4</sub>Zn<sub>3</sub>, K<sub>2</sub>O<sub>7</sub>Se<sub>2</sub>, K<sub>2</sub>Rb<sub>2</sub>Re<sub>6</sub>S<sub>13</sub>, K<sub>2</sub>Re<sub>3</sub>S<sub>6</sub>, K<sub>2</sub>Re<sub>3</sub>Se<sub>6</sub>, K<sub>2</sub>S<sub>3</sub>Ti, K<sub>2</sub>S<sub>5</sub>Sn<sub>2</sub>, K<sub>2</sub>S<sub>7</sub>Sb<sub>4</sub>, K<sub>2</sub>Se<sub>5</sub>Sn<sub>2</sub>, K<sub>3</sub>NaO<sub>8</sub>W<sub>2</sub>, K<sub>4</sub>Re<sub>6</sub>Se<sub>12</sub>, K<sub>4</sub>S<sub>14</sub>Ti<sub>3</sub>, K<sub>6</sub>Nb<sub>4</sub>S<sub>22</sub>, K<sub>6</sub>S<sub>22</sub>Ta<sub>4</sub>, K<sub>6</sub>Sb<sub>3</sub>Tl<sub>2</sub>, La<sub>2</sub>O<sub>11</sub>Te<sub>4</sub>, LiMo<sub>2</sub>O<sub>8</sub>Sb, LiO<sub>6</sub>ScSi<sub>2</sub>, LiO<sub>8</sub>Ta<sub>3</sub>, LiS<sub>2</sub>Sb, Li<sub>2</sub>O<sub>3</sub>Pb, Li<sub>2</sub>O<sub>3</sub>Sn, Li<sub>2</sub>O<sub>3</sub>Te, Li<sub>2</sub>O<sub>3</sub>Ti, Li<sub>2</sub>O<sub>3</sub>Zr, Li<sub>2</sub>O<sub>4</sub>W, Li<sub>2</sub>S<sub>3</sub>Sn, Li<sub>3</sub>Na<sub>5</sub>S<sub>8</sub>Ti<sub>2</sub>, Li<sub>3</sub>O<sub>4</sub>Ta, Li<sub>4</sub>O<sub>5</sub>Se, Li<sub>6</sub>O<sub>7</sub>Zr<sub>2</sub>, LuO<sub>4</sub>Ta, MgO, Mg<sub>2</sub>O<sub>8</sub>Te<sub>3</sub>, MoNa<sub>2</sub>O<sub>12</sub>Te<sub>4</sub>, MoO<sub>2</sub>Rb<sub>2</sub>S<sub>2</sub>, MoO<sub>6</sub>Y<sub>2</sub>, <b>MoP<sub>4</sub></b>, Mo<sub>2</sub>O<sub>8</sub>Zr, Mo<sub>3</sub>Na<sub>2</sub>O<sub>12</sub>Zr, Mo<sub>3</sub>O<sub>10</sub>Rb<sub>2</sub>, Mo<sub>7</sub>O<sub>22</sub>Tl<sub>2</sub>, N<sub>2</sub>OSi<sub>2</sub>, N<sub>2</sub>O<sub>2</sub>S<sub>2</sub>Se, N<sub>2</sub>O<sub>2</sub>S<sub>3</sub>, N<sub>3</sub>NbSr<sub>2</sub>, N<sub>3</sub>Sr<sub>2</sub>Ta, N<sub>4</sub>Se<sub>4</sub>, N<sub>6</sub>S<sub>5</sub>, NaNb<sub>2</sub>PS<sub>10</sub>, NaO<sub>2</sub>Y, NaO<sub>3</sub>RbTi, NaO<sub>6</sub>ScSi<sub>2</sub>, NaS<sub>2</sub>Sb,</p>                                                                                                                                                                                                                                                                                                                                                                                                                                                                                                                                                                                                                                                                                                                                                                                                                                                                                                                                                                                                                                                                                                                                                                                                                       |



Part 3 of all the predicted materials with band crossings from **Cases 1 or 2**:

|    |                                                                                                                                                                                                                                                                                                                                                                                                                                                                                                                                                                                                                                                                                                                                                                                                                                                                                                                                                                                                                                                                                                                                                                                                                                                                                                                                                                                                                                                                                                                                                                                                                                                                                                                                                                                                                                                                                                                                                                                                                                                                                                                                                                                                                                                                                                                                                                                                                                                                                                                                                                                                                                                                                                                                                                                                                                                                                                                                                                                                                                                                                                                                                                                                                                                                                                                                                                                                                                                                                                                                                                                                                                                                                                                                                                                                                                                                                                                                                                                                                                                                                                                                                                                          |
|----|------------------------------------------------------------------------------------------------------------------------------------------------------------------------------------------------------------------------------------------------------------------------------------------------------------------------------------------------------------------------------------------------------------------------------------------------------------------------------------------------------------------------------------------------------------------------------------------------------------------------------------------------------------------------------------------------------------------------------------------------------------------------------------------------------------------------------------------------------------------------------------------------------------------------------------------------------------------------------------------------------------------------------------------------------------------------------------------------------------------------------------------------------------------------------------------------------------------------------------------------------------------------------------------------------------------------------------------------------------------------------------------------------------------------------------------------------------------------------------------------------------------------------------------------------------------------------------------------------------------------------------------------------------------------------------------------------------------------------------------------------------------------------------------------------------------------------------------------------------------------------------------------------------------------------------------------------------------------------------------------------------------------------------------------------------------------------------------------------------------------------------------------------------------------------------------------------------------------------------------------------------------------------------------------------------------------------------------------------------------------------------------------------------------------------------------------------------------------------------------------------------------------------------------------------------------------------------------------------------------------------------------------------------------------------------------------------------------------------------------------------------------------------------------------------------------------------------------------------------------------------------------------------------------------------------------------------------------------------------------------------------------------------------------------------------------------------------------------------------------------------------------------------------------------------------------------------------------------------------------------------------------------------------------------------------------------------------------------------------------------------------------------------------------------------------------------------------------------------------------------------------------------------------------------------------------------------------------------------------------------------------------------------------------------------------------------------------------------------------------------------------------------------------------------------------------------------------------------------------------------------------------------------------------------------------------------------------------------------------------------------------------------------------------------------------------------------------------------------------------------------------------------------------------------------------------|
| 15 | <p>NaSi, Na<sub>2</sub>Nb<sub>4</sub>O<sub>11</sub>, Na<sub>2</sub>O<sub>11</sub>Si<sub>4</sub>Zr, Na<sub>2</sub>O<sub>12</sub>Te<sub>4</sub>W, Na<sub>2</sub>O<sub>3</sub>Pt, Na<sub>2</sub>O<sub>6</sub>Si<sub>2</sub>Zn, Na<sub>2</sub>O<sub>7</sub>Sb<sub>4</sub>, Na<sub>2</sub>O<sub>7</sub>Si<sub>3</sub>, Na<sub>2</sub>Re<sub>3</sub>Se<sub>6</sub>, Na<sub>2</sub>Re<sub>3</sub>Se<sub>6</sub>, Na<sub>2</sub>Se<sub>3</sub>Te, Na<sub>2</sub>Sn<sub>4</sub>Sr, Na<sub>4</sub>O<sub>10</sub>Te<sub>4</sub>, Na<sub>4</sub>S<sub>8</sub>Sn<sub>3</sub>, Na<sub>4</sub>Si<sub>4</sub>, Na<sub>5</sub>NbO<sub>5</sub>, Na<sub>5</sub>O<sub>5</sub>Ta, Na<sub>6</sub>S<sub>7</sub>Sn<sub>2</sub>, Na<sub>6</sub>Sb<sub>4</sub>Tl, Na<sub>6</sub>Se<sub>7</sub>Si<sub>2</sub>, Na<sub>6</sub>Se<sub>7</sub>Sn<sub>2</sub>, NbO<sub>4</sub>Y, Nb<sub>2</sub>O<sub>5</sub>, Nb<sub>2</sub>O<sub>6</sub>Sn, O<sub>11</sub>Te<sub>4</sub>Y<sub>2</sub>, O<sub>2</sub>RbSb, O<sub>2</sub>Si, O<sub>3</sub>SiZn, O<sub>4</sub>PdS, O<sub>4</sub>PdSe, O<sub>4</sub>Rb<sub>2</sub>Zn<sub>3</sub>, O<sub>4</sub>Sb<sub>2</sub>, O<sub>4</sub>WZn, O<sub>5</sub>Pb<sub>2</sub>Te, O<sub>5</sub>PdSe<sub>2</sub>, O<sub>5</sub>STi, O<sub>5</sub>Sb<sub>2</sub>, O<sub>5</sub>Ta<sub>2</sub>, O<sub>5</sub>Ti<sub>3</sub>, O<sub>6</sub>Pb<sub>2</sub>SbY, O<sub>6</sub>Sn<sub>3</sub>W, O<sub>6</sub>TeZn<sub>3</sub>, O<sub>7</sub>Rb<sub>2</sub>Se<sub>2</sub>, O<sub>7</sub>SnTa<sub>2</sub>, O<sub>8</sub>P<sub>2</sub>Pb<sub>3</sub>, O<sub>8</sub>P<sub>4</sub>, O<sub>8</sub>Te<sub>3</sub>Zn<sub>2</sub>, O<sub>9</sub>Rb<sub>6</sub>Te<sub>2</sub>, O<sub>9</sub>Si<sub>3</sub>Sr<sub>3</sub>, P<sub>2</sub>Pt<sub>5</sub>, P<sub>2</sub>Rb<sub>4</sub>Se<sub>9</sub>, P<sub>2</sub>S<sub>7</sub>Zr, P<sub>4</sub>S<sub>4</sub>, P<sub>6</sub>Pt<sub>4</sub>Sr, PbS<sub>4</sub>Tl<sub>2</sub>Zr, PbSe<sub>4</sub>Tl<sub>2</sub>Zr, Pb<sub>3</sub>S<sub>15</sub>Sb<sub>8</sub>, Pb<sub>5</sub>S<sub>17</sub>Sb<sub>8</sub>, Pb<sub>9</sub>Pd<sub>13</sub>, Rb<sub>2</sub>Re<sub>3</sub>S<sub>6</sub>, Rb<sub>2</sub>Re<sub>3</sub>Se<sub>6</sub>, Rb<sub>2</sub>Se<sub>5</sub>Sn<sub>2</sub>, Rb<sub>4</sub>Re<sub>6</sub>S<sub>12</sub>, Rb<sub>4</sub>Re<sub>6</sub>S<sub>13</sub>, Rb<sub>4</sub>Re<sub>6</sub>Se<sub>12</sub>, Rb<sub>4</sub>S<sub>14</sub>Ti<sub>3</sub>, Rb<sub>4</sub>Se<sub>14</sub>Zr<sub>3</sub>, Rb<sub>4</sub>Te<sub>16</sub>Zr<sub>3</sub>, Re<sub>2</sub>Sc<sub>3</sub>Si<sub>4</sub>, Re<sub>3</sub>S<sub>6</sub>Tl<sub>2</sub>, Re<sub>3</sub>Se<sub>6</sub>Tl<sub>2</sub>, Re<sub>6</sub>Se<sub>12</sub>Tl<sub>4</sub>, S<sub>10</sub>, STa<sub>6</sub>, S<sub>3</sub>Sn<sub>2</sub>Tl<sub>2</sub>, S<sub>5</sub>Sn<sub>2</sub>Tl<sub>2</sub>, Sb<sub>2</sub>Te<sub>3</sub>, Se<sub>3</sub>Tl<sub>2</sub>, Se<sub>4</sub>SiTl<sub>4</sub>, TeTl<sub>2</sub>, Te<sub>3</sub>Tl<sub>2</sub>,</p>                                                                                                                                                                                                                                                                                                                                                                                                                                                                                                                                                                                                                                                                                                                                                                                                                                                                                                                                                                                                                                                                                                                                                                                                                                                      |
| 16 | AlPS <sub>4</sub> , C <sub>11</sub> N <sub>4</sub> ,                                                                                                                                                                                                                                                                                                                                                                                                                                                                                                                                                                                                                                                                                                                                                                                                                                                                                                                                                                                                                                                                                                                                                                                                                                                                                                                                                                                                                                                                                                                                                                                                                                                                                                                                                                                                                                                                                                                                                                                                                                                                                                                                                                                                                                                                                                                                                                                                                                                                                                                                                                                                                                                                                                                                                                                                                                                                                                                                                                                                                                                                                                                                                                                                                                                                                                                                                                                                                                                                                                                                                                                                                                                                                                                                                                                                                                                                                                                                                                                                                                                                                                                                     |
| 17 | Ag <sub>2</sub> Se, B <sub>18</sub> Cs <sub>2</sub> O <sub>28</sub> , C <sub>2</sub> BN, F <sub>10</sub> In <sub>3</sub> Rb, NaNbO <sub>3</sub> ,                                                                                                                                                                                                                                                                                                                                                                                                                                                                                                                                                                                                                                                                                                                                                                                                                                                                                                                                                                                                                                                                                                                                                                                                                                                                                                                                                                                                                                                                                                                                                                                                                                                                                                                                                                                                                                                                                                                                                                                                                                                                                                                                                                                                                                                                                                                                                                                                                                                                                                                                                                                                                                                                                                                                                                                                                                                                                                                                                                                                                                                                                                                                                                                                                                                                                                                                                                                                                                                                                                                                                                                                                                                                                                                                                                                                                                                                                                                                                                                                                                        |
| 19 | <p>AgCsSe<sub>4</sub>, AgHgIS, AgLuSe<sub>2</sub>, AgNO<sub>3</sub>, AgRbSe<sub>4</sub>, AgScSe<sub>2</sub>, AgSe<sub>2</sub>Y, Ag<sub>2</sub>GeO<sub>3</sub>, Ag<sub>2</sub>INO<sub>3</sub>, Ag<sub>2</sub>O<sub>3</sub>Si, Ag<sub>2</sub>O<sub>3</sub>Sn, Ag<sub>2</sub>S, Ag<sub>2</sub>Se, Ag<sub>3</sub>B<sub>5</sub>O<sub>9</sub>, Ag<sub>3</sub>IN<sub>2</sub>O<sub>6</sub>, Ag<sub>4</sub>P<sub>2</sub>S<sub>6</sub>, AlBaF<sub>5</sub>, AlBaLaO<sub>4</sub>, AlCl<sub>4</sub>Na, Al<sub>2</sub>Ca<sub>3</sub>N<sub>4</sub>, Al<sub>2</sub>N<sub>2</sub>O<sub>3</sub>SiSr, AsBr<sub>3</sub>, AsClO<sub>2</sub>Pb, AsCl<sub>3</sub>, AsCl<sub>3</sub>F<sub>6</sub>S, AsK, AsKM<sub>4</sub>O<sub>15</sub>, AsKO<sub>3</sub>, AsKO<sub>9</sub>W<sub>2</sub>, AsNa, AsNaO<sub>9</sub>W<sub>2</sub>, AsO<sub>5</sub>Sb, AsRb, As<sub>2</sub>F<sub>12</sub>Se<sub>4</sub>Te<sub>2</sub>, As<sub>2</sub>Na<sub>4</sub>Te<sub>4</sub>, As<sub>2</sub>O<sub>5</sub>, BG<sub>2</sub>KO<sub>6</sub>, B<sub>2</sub>BaO<sub>6</sub>Zn<sub>2</sub>, B<sub>2</sub>Ba<sub>3</sub>N<sub>4</sub>, B<sub>2</sub>Ca<sub>2</sub>O<sub>5</sub>, B<sub>2</sub>O<sub>7</sub>Se<sub>2</sub>, B<sub>3</sub>F<sub>3</sub>Li<sub>2</sub>O<sub>4</sub>, B<sub>4</sub>LiO<sub>7</sub>Rb, B<sub>6</sub>Cs<sub>2</sub>O<sub>10</sub>, BaBiSe<sub>3</sub>, BaF<sub>5</sub>Ga, BaGeO<sub>3</sub>, BaGeO<sub>4</sub>Pb, BaN<sub>2</sub>O<sub>4</sub>, BaO<sub>3</sub>Si, BaSbTe<sub>3</sub>, Ba<sub>5</sub>N<sub>6</sub>Si<sub>2</sub>, Ba<sub>6</sub>Se<sub>13</sub>Sn<sub>6</sub>, BeCaFNaO<sub>6</sub>Si<sub>2</sub>, BeF<sub>3</sub>Rb, BiClO<sub>3</sub>Se, BiCl<sub>2</sub>KO<sub>4</sub>S, BiSe<sub>3</sub>Sr, Bi<sub>2</sub>I<sub>4</sub>O<sub>13</sub>, Bi<sub>4</sub>Cl<sub>14</sub>Se<sub>10</sub>, BrNO<sub>3</sub>, Br<sub>3</sub>Sb, Br<sub>4</sub>CsTl, Br<sub>4</sub>InNa, Br<sub>5</sub>PbTl<sub>3</sub>, CO<sub>2</sub>, CO<sub>4</sub>Pb<sub>2</sub>, C<sub>2</sub>F<sub>2</sub>O<sub>3</sub>, C<sub>2</sub>F<sub>5</sub>O<sub>4</sub>RbSb<sub>2</sub>, C<sub>2</sub>N<sub>2</sub>Se<sub>2</sub>, C<sub>4</sub>AlBa<sub>2</sub>LiN<sub>8</sub>, C<sub>4</sub>BF<sub>12</sub>K, C<sub>4</sub>O<sub>4</sub>Tl<sub>2</sub>, CdCs<sub>2</sub>Ge<sub>3</sub>Se<sub>8</sub>, CdCs<sub>2</sub>Se<sub>8</sub>Sn<sub>3</sub>, CdI<sub>2</sub>O<sub>6</sub>, Cd<sub>2</sub>O<sub>12</sub>Rb<sub>2</sub>S<sub>3</sub>, Cl<sub>14</sub>Ga<sub>3</sub>Sb<sub>7</sub>Se<sub>8</sub>, ClF<sub>3</sub>Sn<sub>2</sub>, Cl<sub>2</sub>S, Cl<sub>2</sub>Si, Cl<sub>4</sub>Cs<sub>2</sub>Hg, Cl<sub>4</sub>GaNa, Cl<sub>5</sub>N<sub>3</sub>OP<sub>2</sub>S, Cl<sub>5</sub>N<sub>3</sub>S<sub>4</sub>Se, Cs<sub>11</sub>O<sub>3</sub>Rb<sub>7</sub>, CsSb, Cs<sub>2</sub>Ge<sub>3</sub>MgSe<sub>8</sub>, Cs<sub>2</sub>Ge<sub>3</sub>Se<sub>8</sub>Zn, Cs<sub>2</sub>Ge<sub>3</sub>Te<sub>8</sub>Zn, Cs<sub>2</sub>HgS<sub>8</sub>Sn<sub>3</sub>, Cs<sub>2</sub>HgSe<sub>8</sub>Sn<sub>3</sub>, Cs<sub>2</sub>MgSe<sub>8</sub>Sn<sub>3</sub>, Cs<sub>2</sub>S<sub>5</sub>, Cs<sub>2</sub>Se<sub>5</sub>, Cs<sub>2</sub>Se<sub>8</sub>Sn<sub>3</sub>Zn, F<sub>10</sub>IN<sub>3</sub>O<sub>3</sub>, FIO<sub>2</sub>, F<sub>2</sub>Ge, F<sub>2</sub>Sn, F<sub>3</sub>K<sub>2</sub>O<sub>4</sub>SSb, F<sub>4</sub>S, F<sub>4</sub>Se, F<sub>4</sub>Te, F<sub>5</sub>Na<sub>2</sub>Sb, F<sub>6</sub>Na<sub>3</sub>NbO, GeI<sub>3</sub>Rb, GeO<sub>4</sub>PbSr, ISSb, I<sub>5</sub>PbTl<sub>3</sub>, KLi<sub>2</sub>NaO<sub>8</sub>S<sub>2</sub>, KP, KP<sub>2</sub>Se<sub>6</sub>Y, K<sub>2</sub>S<sub>5</sub>, K<sub>2</sub>Se<sub>5</sub>, LaN<sub>5</sub>Si<sub>3</sub>, La<sub>2</sub>O<sub>6</sub>Te, Li<sub>3</sub>P<sub>7</sub>, MoNa<sub>4</sub>O<sub>14</sub>S<sub>3</sub>, NaP, Na<sub>4</sub>SnTe<sub>4</sub>, NbO<sub>5</sub>RbSi, O<sub>2</sub>Rb<sub>2</sub>Sn, O<sub>2</sub>Si, O<sub>2</sub>Te, O<sub>3</sub>Sb<sub>2</sub>, O<sub>3</sub>Xe, O<sub>4</sub>SeTl<sub>2</sub>, O<sub>6</sub>TeY<sub>2</sub>, O<sub>6</sub>WY<sub>2</sub>, PPbRbS<sub>4</sub>, RbSb, Rb<sub>2</sub>S<sub>5</sub>, Rb<sub>2</sub>Se<sub>5</sub>, S<sub>17</sub>Sb<sub>6</sub>Sr<sub>6</sub>, S<sub>5</sub>Tl<sub>2</sub>,</p> |
| 20 | <p>AgAsK<sub>2</sub>, AgAsNa<sub>2</sub>, AgBiK<sub>2</sub>, AgK<sub>2</sub>Sb, AlF<sub>5</sub>Tl<sub>2</sub>, AlO<sub>4</sub>P, AsGaO<sub>4</sub>, B<sub>3</sub>Ba<sub>3</sub>BrO<sub>9</sub>Pb<sub>2</sub>, B<sub>5</sub>Cs<sub>2</sub>Li<sub>3</sub>O<sub>10</sub>, BaNb<sub>2</sub>O<sub>6</sub>, BaO<sub>3</sub>Ti, Ba<sub>6</sub>OS<sub>15</sub>Ti<sub>5</sub>, BeLi<sub>2</sub>O<sub>4</sub>Si, BeO<sub>6</sub>P<sub>2</sub>, Bi<sub>2</sub>K<sub>4</sub>Zn, Br<sub>4</sub>Cs<sub>3</sub>Li, CCaO<sub>3</sub>, CMgO<sub>3</sub>, CdO<sub>10</sub>Pb<sub>6</sub>Te, ClF<sub>5</sub>GeO<sub>2</sub>, FInO<sub>5</sub>Te<sub>2</sub>, F<sub>3</sub>ISn<sub>2</sub>, InNa<sub>2</sub>, K<sub>2</sub>O<sub>6</sub>Si<sub>2</sub>Zn, Na<sub>2</sub>Tl, NbSe<sub>2</sub>, O<sub>13</sub>P<sub>4</sub>Y<sub>2</sub>, O<sub>2</sub>Si, O<sub>7</sub>TaY<sub>3</sub>,</p>                                                                                                                                                                                                                                                                                                                                                                                                                                                                                                                                                                                                                                                                                                                                                                                                                                                                                                                                                                                                                                                                                                                                                                                                                                                                                                                                                                                                                                                                                                                                                                                                                                                                                                                                                                                                                                                                                                                                                                                                                                                                                                                                                                                                                                                                                                                                                                                                                                                                                                                                                                                                                                                                                                                                                                                                                                                                                                                                                                                                                                                                                                                                                                                                                                                                                                                   |
| 21 | O <sub>8</sub> U <sub>3</sub> ,                                                                                                                                                                                                                                                                                                                                                                                                                                                                                                                                                                                                                                                                                                                                                                                                                                                                                                                                                                                                                                                                                                                                                                                                                                                                                                                                                                                                                                                                                                                                                                                                                                                                                                                                                                                                                                                                                                                                                                                                                                                                                                                                                                                                                                                                                                                                                                                                                                                                                                                                                                                                                                                                                                                                                                                                                                                                                                                                                                                                                                                                                                                                                                                                                                                                                                                                                                                                                                                                                                                                                                                                                                                                                                                                                                                                                                                                                                                                                                                                                                                                                                                                                          |
| 25 | <p>Ag<sub>3</sub>Sb, AsGa, Bi<sub>4</sub>Br<sub>2</sub>O<sub>9</sub>Te<sub>2</sub>, CB<sub>2</sub>N, C<sub>2</sub>BN, CaMoO<sub>6</sub>Sr<sub>2</sub>, CaO<sub>6</sub>Sr<sub>2</sub>W, Ca<sub>2</sub>O<sub>6</sub>PdW, CdO<sub>6</sub>Sr<sub>2</sub>W, CdTe, HfNO<sub>3</sub>Ta, InSb, SiTi,</p>                                                                                                                                                                                                                                                                                                                                                                                                                                                                                                                                                                                                                                                                                                                                                                                                                                                                                                                                                                                                                                                                                                                                                                                                                                                                                                                                                                                                                                                                                                                                                                                                                                                                                                                                                                                                                                                                                                                                                                                                                                                                                                                                                                                                                                                                                                                                                                                                                                                                                                                                                                                                                                                                                                                                                                                                                                                                                                                                                                                                                                                                                                                                                                                                                                                                                                                                                                                                                                                                                                                                                                                                                                                                                                                                                                                                                                                                                         |
| 26 | <p>AgNbO<sub>3</sub>, B<sub>2</sub>K<sub>3</sub>Nb<sub>3</sub>O<sub>12</sub>, BaCdK<sub>2</sub>Sb<sub>2</sub>, BaHgS<sub>2</sub>, Br<sub>4</sub>CsLi<sub>3</sub>, CaF<sub>2</sub>, CaNO<sub>2</sub>Ta, CaPpT, CdK<sub>2</sub>Sb<sub>2</sub>Sr, CdO<sub>3</sub>Ti, Cl<sub>2</sub>O<sub>2</sub>W, F<sub>13</sub>RbTh<sub>3</sub>, F<sub>13</sub>Th<sub>3</sub>Tl, Ge<sub>3</sub>NaP<sub>3</sub>, In<sub>11</sub>Mo<sub>40</sub>O<sub>62</sub>, KPSe<sub>6</sub>Zr, MoPt<sub>2</sub>Si<sub>3</sub>, NaNbO<sub>3</sub>, Na<sub>2</sub>O<sub>5</sub>SiTi, O<sub>2</sub>Se, O<sub>3</sub>Pb<sub>2</sub>, P<sub>5</sub>Tl,</p>                                                                                                                                                                                                                                                                                                                                                                                                                                                                                                                                                                                                                                                                                                                                                                                                                                                                                                                                                                                                                                                                                                                                                                                                                                                                                                                                                                                                                                                                                                                                                                                                                                                                                                                                                                                                                                                                                                                                                                                                                                                                                                                                                                                                                                                                                                                                                                                                                                                                                                                                                                                                                                                                                                                                                                                                                                                                                                                                                                                                                                                                                                                                                                                                                                                                                                                                                                                                                                                                                                                                                                  |

Part 4 of all the predicted materials with band crossings from **Cases 1 or 2**:

|           |                                                                                                                                                                                                                                                                                                                                                                                                                                                                                                                                                                                                                                                                                                                                                                                                                                                                                                                                                                                                                                                                                                                                                                                                                                                                                                                                                                                                                                                                                                                                                                                                                                                                                                                                                                                                                                                                                                                                                                                                                                                                                                                                                                                                                                                                                                                                                                                                                                                                                                                                                                                                                                                                                                                                                                                                                                                                                                                                                                                                                                                                                                                                                                                                                                                                                                                                                                                                                                                                                                                                                                                                                                                                                                                                                                                                                                                                                                      |
|-----------|------------------------------------------------------------------------------------------------------------------------------------------------------------------------------------------------------------------------------------------------------------------------------------------------------------------------------------------------------------------------------------------------------------------------------------------------------------------------------------------------------------------------------------------------------------------------------------------------------------------------------------------------------------------------------------------------------------------------------------------------------------------------------------------------------------------------------------------------------------------------------------------------------------------------------------------------------------------------------------------------------------------------------------------------------------------------------------------------------------------------------------------------------------------------------------------------------------------------------------------------------------------------------------------------------------------------------------------------------------------------------------------------------------------------------------------------------------------------------------------------------------------------------------------------------------------------------------------------------------------------------------------------------------------------------------------------------------------------------------------------------------------------------------------------------------------------------------------------------------------------------------------------------------------------------------------------------------------------------------------------------------------------------------------------------------------------------------------------------------------------------------------------------------------------------------------------------------------------------------------------------------------------------------------------------------------------------------------------------------------------------------------------------------------------------------------------------------------------------------------------------------------------------------------------------------------------------------------------------------------------------------------------------------------------------------------------------------------------------------------------------------------------------------------------------------------------------------------------------------------------------------------------------------------------------------------------------------------------------------------------------------------------------------------------------------------------------------------------------------------------------------------------------------------------------------------------------------------------------------------------------------------------------------------------------------------------------------------------------------------------------------------------------------------------------------------------------------------------------------------------------------------------------------------------------------------------------------------------------------------------------------------------------------------------------------------------------------------------------------------------------------------------------------------------------------------------------------------------------------------------------------------------------|
| <b>26</b> | Pb <sub>3</sub> Si <sub>2</sub> Sn <sub>3</sub> Y <sub>2</sub> ,                                                                                                                                                                                                                                                                                                                                                                                                                                                                                                                                                                                                                                                                                                                                                                                                                                                                                                                                                                                                                                                                                                                                                                                                                                                                                                                                                                                                                                                                                                                                                                                                                                                                                                                                                                                                                                                                                                                                                                                                                                                                                                                                                                                                                                                                                                                                                                                                                                                                                                                                                                                                                                                                                                                                                                                                                                                                                                                                                                                                                                                                                                                                                                                                                                                                                                                                                                                                                                                                                                                                                                                                                                                                                                                                                                                                                                     |
| <b>29</b> | AgIO <sub>3</sub> , BNa <sub>5</sub> O <sub>16</sub> S <sub>4</sub> , B <sub>3</sub> BiO <sub>6</sub> , B <sub>7</sub> ClMg <sub>3</sub> O <sub>13</sub> , Ba <sub>2</sub> N <sub>5</sub> O <sub>10</sub> Tl, BiIO <sub>4</sub> , Bi <sub>2</sub> FNbO <sub>5</sub> , Bi <sub>2</sub> MoO <sub>6</sub> , C <sub>2</sub> Cl <sub>2</sub> Hg <sub>3</sub> N <sub>4</sub> , C <sub>2</sub> FNOS, CaO <sub>3</sub> Te, CdI <sub>2</sub> O <sub>6</sub> , CdN <sub>2</sub> O <sub>6</sub> , Cl <sub>11</sub> Mo <sub>3</sub> N <sub>2</sub> , ClFO <sub>2</sub> S, Cs <sub>4</sub> GeP <sub>4</sub> Se <sub>12</sub> , Cs <sub>4</sub> Si <sub>11</sub> Ta <sub>2</sub> , F <sub>16</sub> PdXe <sub>2</sub> , F <sub>2</sub> IKO <sub>2</sub> , F <sub>2</sub> OSe, F <sub>4</sub> RbTl, F <sub>4</sub> SW, GaLaOSe <sub>2</sub> , GeKNO, GeP <sub>4</sub> Rb <sub>4</sub> Se <sub>12</sub> , GePtS, GePtSe, Ge <sub>4</sub> LiNaO <sub>9</sub> , Ge <sub>4</sub> Li <sub>2</sub> O <sub>9</sub> , Ge <sub>4</sub> Se <sub>9</sub> , HgN <sub>6</sub> , InNbO <sub>8</sub> Te <sub>2</sub> , KPSe <sub>6</sub> , K <sub>2</sub> MgO <sub>4</sub> Si, K <sub>2</sub> O <sub>4</sub> SiZn, K <sub>4</sub> Nb <sub>2</sub> Si <sub>11</sub> , LiNOSi, Mg <sub>2</sub> O <sub>6</sub> Si <sub>2</sub> , NaNbO <sub>3</sub> , O <sub>2</sub> Zr, O <sub>5</sub> TeU, P <sub>6</sub> Rb <sub>4</sub> Se <sub>12</sub> ,                                                                                                                                                                                                                                                                                                                                                                                                                                                                                                                                                                                                                                                                                                                                                                                                                                                                                                                                                                                                                                                                                                                                                                                                                                                                                                                                                                                                                                                                                                                                                                                                                                                                                                                                                                                                                                                                                                                                                                                                                                                                                                                                                                                                                                                                                                                                                                                                                                                                                         |
| <b>31</b> | AgCd <sub>2</sub> GaS <sub>4</sub> , Ag <sub>2</sub> CdGeS <sub>4</sub> , Ag <sub>2</sub> HgSe <sub>4</sub> Sn, Ag <sub>2</sub> L <sub>4</sub> Zn, Ag <sub>3</sub> AsS <sub>4</sub> , Ag <sub>3</sub> PS <sub>4</sub> , Ag <sub>3</sub> PSe <sub>4</sub> , Al <sub>4</sub> BaS <sub>7</sub> , As <sub>4</sub> K <sub>7</sub> Nb, As <sub>4</sub> NbRb <sub>7</sub> , BBaClF <sub>4</sub> , B <sub>3</sub> Be <sub>2</sub> KO <sub>7</sub> , B <sub>3</sub> Be <sub>2</sub> O <sub>7</sub> Rb, B <sub>4</sub> CaO <sub>7</sub> , B <sub>4</sub> HgO <sub>7</sub> , B <sub>4</sub> O <sub>7</sub> Sn, BaBe <sub>2</sub> O <sub>7</sub> Si <sub>2</sub> , BaGa <sub>4</sub> S <sub>7</sub> , Ba <sub>2</sub> N <sub>8</sub> Si <sub>5</sub> , BrIn <sub>5</sub> S <sub>5</sub> , BrIn <sub>5</sub> Se <sub>5</sub> , CGaNSi, CLi <sub>4</sub> O <sub>4</sub> , C <sub>6</sub> Cs <sub>3</sub> N <sub>6</sub> NaRe <sub>6</sub> Se <sub>8</sub> , CaCl <sub>2</sub> , CdGeLi <sub>2</sub> O <sub>4</sub> , CdGeLi <sub>2</sub> S <sub>4</sub> , CdLi <sub>2</sub> S <sub>4</sub> Sn, CdO <sub>4</sub> S, Cd <sub>3</sub> Na <sub>6</sub> O <sub>18</sub> Si <sub>6</sub> , Ge <sub>16</sub> K <sub>14</sub> Zn, Ge <sub>16</sub> Rb <sub>14</sub> Zn, HfNO <sub>3</sub> Ta, HgO <sub>4</sub> S, I <sub>2</sub> Zr, I <sub>4</sub> Te, K <sub>10</sub> MgMo <sub>7</sub> O <sub>27</sub> , MoNNa <sub>3</sub> O <sub>3</sub> , N <sub>8</sub> Si <sub>5</sub> Sr <sub>2</sub> , NaNbO <sub>3</sub> , OSn, O <sub>7</sub> STe <sub>2</sub> , S <sub>3</sub> Sb <sub>2</sub> , Te <sub>2</sub> W,                                                                                                                                                                                                                                                                                                                                                                                                                                                                                                                                                                                                                                                                                                                                                                                                                                                                                                                                                                                                                                                                                                                                                                                                                                                                                                                                                                                                                                                                                                                                                                                                                                                                                                                                                                                                                                                                                                                                                                                                                                                                                                                                                                                                                                                                                                           |
| <b>33</b> | AgAsS, AlF <sub>6</sub> Li <sub>3</sub> , AlGeLi <sub>3</sub> O <sub>5</sub> , AlLi <sub>4</sub> O <sub>4</sub> Si, AlO <sub>4</sub> RbSi, AlO <sub>4</sub> SiTl, Al <sub>2</sub> Rb <sub>4</sub> S <sub>5</sub> , AsBeCsO <sub>4</sub> , AsK <sub>3</sub> S <sub>4</sub> , AsLiMoO <sub>6</sub> , AsLi <sub>3</sub> S <sub>3</sub> , AuSbTl, Ba <sub>2</sub> Ge <sub>2</sub> Te <sub>5</sub> , BeF <sub>4</sub> Na <sub>2</sub> , BeN <sub>2</sub> Si, BiCl <sub>3</sub> , Bi <sub>2</sub> O <sub>7</sub> Ti <sub>2</sub> , BrNZn <sub>2</sub> , C <sub>15</sub> N <sub>3</sub> O <sub>12</sub> Re <sub>3</sub> , CBr <sub>2</sub> Se <sub>4</sub> , C <sub>4</sub> N <sub>4</sub> PbS <sub>4</sub> Zn, CaF <sub>22</sub> P <sub>2</sub> Xe <sub>5</sub> , CaGa <sub>2</sub> O <sub>4</sub> , Ca <sub>2</sub> Nb <sub>2</sub> O <sub>7</sub> , CdNaO <sub>4</sub> P, CdP <sub>2</sub> , Cl <sub>10</sub> Re <sub>6</sub> Te <sub>8</sub> , ClF <sub>11</sub> Sb <sub>2</sub> Xe, Cl <sub>4</sub> GaHg <sub>2</sub> Sb, Cl <sub>4</sub> Rb <sub>2</sub> Zn, Cl <sub>7</sub> Ga <sub>2</sub> In, Cl <sub>7</sub> Ga <sub>2</sub> K, Cl <sub>7</sub> Ga <sub>3</sub> , CsIMoO <sub>6</sub> , CsO <sub>7</sub> SbSi <sub>2</sub> , F <sub>2</sub> O <sub>4</sub> RbSSb, F <sub>5</sub> KNaNbO, F <sub>5</sub> K <sub>2</sub> Y, F <sub>6</sub> KNaSn, F <sub>6</sub> N <sub>3</sub> P <sub>3</sub> , GaGeLi <sub>3</sub> O <sub>5</sub> , GaLiS <sub>2</sub> , GaLiSe <sub>2</sub> , GaNaO <sub>2</sub> , GeKNaO <sub>3</sub> , GeKO <sub>5</sub> P, GeO <sub>5</sub> RbSb, Ge <sub>2</sub> Na <sub>2</sub> Se <sub>5</sub> , Hg <sub>2</sub> O <sub>5</sub> Te, Hg <sub>5</sub> I <sub>6</sub> Sb <sub>2</sub> , ILiO <sub>3</sub> , INaO <sub>3</sub> , ISSb, InLiS <sub>2</sub> , InLiSe <sub>2</sub> , KLiO <sub>4</sub> S, KO <sub>5</sub> SbSi, LaLuS <sub>3</sub> , LaO <sub>3</sub> Y, LaS <sub>2</sub> , La <sub>2</sub> O <sub>7</sub> Ti <sub>2</sub> , LiP <sub>5</sub> , Li <sub>2</sub> S, MgN <sub>2</sub> Si, MgNa <sub>2</sub> O <sub>4</sub> Si, Mg <sub>2</sub> O <sub>6</sub> Si <sub>2</sub> , Mo <sub>3</sub> O <sub>16</sub> Tl <sub>2</sub> U <sub>2</sub> , N <sub>2</sub> SiZn, NaNbO <sub>3</sub> , NaO <sub>3</sub> Ta, NaO <sub>4</sub> SiY, NaO <sub>6</sub> Se <sub>2</sub> Y, Na <sub>2</sub> O <sub>3</sub> S <sub>2</sub> , Na <sub>4</sub> O <sub>13</sub> Sc <sub>2</sub> Si <sub>4</sub> , NbO <sub>4</sub> Sb, O <sub>2</sub> Sb, O <sub>2</sub> Si, O <sub>4</sub> SbTa, O <sub>4</sub> Sb <sub>2</sub> , PS <sub>4</sub> SnTl, P <sub>4</sub> Se <sub>5</sub> , S <sub>3</sub> ScY, S <sub>3</sub> Sc <sub>2</sub> , S <sub>3</sub> Sr <sub>2</sub> Zn,                                                                                                                                                                                                                                                                                                                                                                                                                                                                                                                                                                                                                                                                                                                                                                                                                                                                                                                                                                                                                                                                                                                                                                                                         |
| <b>36</b> | Ag <sub>10</sub> Br <sub>3</sub> Te <sub>4</sub> , AgS <sub>3</sub> Ta, Ag <sub>2</sub> GeS <sub>3</sub> , Ag <sub>2</sub> HgI <sub>2</sub> S, Ag <sub>5</sub> S <sub>4</sub> Sb, AlBaN <sub>5</sub> O <sub>3</sub> Si <sub>4</sub> , Al <sub>2</sub> BaN <sub>4</sub> O <sub>4</sub> Si <sub>3</sub> , Al <sub>6</sub> Ca <sub>5</sub> O <sub>14</sub> , AsBiCa <sub>2</sub> O <sub>6</sub> , AsBiCd <sub>2</sub> O <sub>6</sub> , AsCs <sub>2</sub> LiO <sub>4</sub> , AsLiO <sub>4</sub> Rb <sub>2</sub> , As <sub>2</sub> Ca <sub>2</sub> Cd, As <sub>2</sub> Cl <sub>13</sub> Sb, Au <sub>2</sub> Ga, Au <sub>2</sub> O <sub>10</sub> Se <sub>3</sub> , B <sub>2</sub> O <sub>3</sub> , BaBi <sub>2</sub> Nb <sub>2</sub> O <sub>9</sub> , BaF <sub>4</sub> Mg, BaF <sub>4</sub> Zn, BaMo <sub>2</sub> O <sub>11</sub> Se <sub>2</sub> , BaO <sub>4</sub> W, BaO <sub>7</sub> Si <sub>2</sub> Zn <sub>2</sub> , BaP <sub>10</sub> , Ba <sub>2</sub> BiInS <sub>5</sub> , Ba <sub>2</sub> GaTe <sub>5</sub> Y, Ba <sub>2</sub> InSbSe <sub>5</sub> , Ba <sub>2</sub> InSe <sub>5</sub> Y, Ba <sub>2</sub> InTe <sub>5</sub> Y, Ba <sub>4</sub> Sb <sub>2</sub> Se <sub>11</sub> Si, BiPbPd <sub>2</sub> , BiPd, Bi <sub>2</sub> CaO <sub>9</sub> Ta <sub>2</sub> , Bi <sub>2</sub> GeO <sub>5</sub> , Bi <sub>2</sub> Nb <sub>2</sub> O <sub>9</sub> Pb, Bi <sub>2</sub> O <sub>5</sub> Si, Bi <sub>2</sub> O <sub>9</sub> SrTa <sub>2</sub> , BrCl, BrF <sub>5</sub> , BrI, C, CaAl <sub>4</sub> O <sub>4</sub> , CClF <sub>3</sub> , CLi <sub>4</sub> O <sub>4</sub> , C <sub>3</sub> Al <sub>7</sub> N <sub>3</sub> , Ca <sub>3</sub> O <sub>7</sub> Ti <sub>2</sub> , ClIn, ClN <sub>3</sub> , Cs <sub>2</sub> Li, Cs <sub>2</sub> F <sub>3</sub> Li, Cs <sub>2</sub> I <sub>3</sub> Li, Cs <sub>2</sub> O <sub>3</sub> Pb, Cs <sub>2</sub> S <sub>2</sub> Te, Cs <sub>2</sub> S <sub>3</sub> , Cs <sub>2</sub> S <sub>3</sub> Ti, Cs <sub>2</sub> Se <sub>3</sub> , Cs <sub>2</sub> Te <sub>3</sub> , F <sub>2</sub> NP, F <sub>3</sub> K <sub>3</sub> O <sub>4</sub> Ti, F <sub>4</sub> MgSr, GaInS <sub>3</sub> , GaO <sub>6</sub> Y <sub>3</sub> , GaS <sub>6</sub> Y <sub>3</sub> , Ga <sub>2</sub> GeLa <sub>2</sub> S <sub>8</sub> , GeLi <sub>2</sub> O <sub>3</sub> , GeNa <sub>2</sub> O <sub>3</sub> , GeTe <sub>4</sub> Zr, Ge <sub>2</sub> LiN <sub>3</sub> , Ge <sub>2</sub> N <sub>2</sub> O, Ge <sub>2</sub> N <sub>3</sub> Na, Ge <sub>6</sub> La <sub>4</sub> Mg <sub>5</sub> , Ge <sub>6</sub> Lu <sub>4</sub> Zn <sub>5</sub> , Ge <sub>6</sub> Y <sub>4</sub> Zn <sub>5</sub> , Hg <sub>2</sub> O <sub>3</sub> Se, I <sub>2</sub> O <sub>7</sub> Ti, I <sub>4</sub> Nb, In <sub>2</sub> Na <sub>5</sub> Te <sub>6</sub> , K <sub>2</sub> O <sub>3</sub> Pb, K <sub>2</sub> S <sub>3</sub> , K <sub>2</sub> Se <sub>3</sub> , K <sub>3</sub> S <sub>4</sub> Sb, LaO <sub>4</sub> Ta, LiN <sub>3</sub> Si <sub>2</sub> , Li <sub>2</sub> NO <sub>2</sub> P, Li <sub>2</sub> O <sub>3</sub> Si, Li <sub>2</sub> O <sub>8</sub> Sn <sub>3</sub> Zn, Mg <sub>2</sub> N <sub>3</sub> P, Mg <sub>2</sub> O <sub>4</sub> Si, MoP <sub>2</sub> , NNa <sub>5</sub> O <sub>4</sub> W, N <sub>2</sub> OSi <sub>2</sub> , N <sub>3</sub> NaSi <sub>2</sub> , N <sub>3</sub> PZn <sub>2</sub> , Na <sub>2</sub> O <sub>3</sub> Si, Na <sub>2</sub> O <sub>7</sub> W <sub>2</sub> , Na <sub>2</sub> PdS <sub>2</sub> , Na <sub>2</sub> PdSe <sub>2</sub> , Na <sub>2</sub> PtS <sub>2</sub> , Na <sub>2</sub> PtSe <sub>2</sub> , NbS <sub>2</sub> , Nb <sub>2</sub> O <sub>7</sub> Sr <sub>2</sub> , OSn, O <sub>3</sub> PbRb <sub>2</sub> , O <sub>5</sub> Pb <sub>3</sub> Se, O <sub>7</sub> Sr <sub>2</sub> Ta <sub>2</sub> , PSi, P <sub>2</sub> W, PbS, Pd <sub>2</sub> Sb, Rb <sub>2</sub> S <sub>3</sub> , Rb <sub>2</sub> Se <sub>3</sub> , Sc <sub>9</sub> Te <sub>2</sub> , |
| <b>38</b> | La <sub>4</sub> O <sub>4</sub> Se <sub>3</sub> , O <sub>8</sub> U <sub>3</sub> , Re <sub>2</sub> ScSi <sub>3</sub> , Re <sub>8</sub> Sc <sub>5</sub> Si <sub>12</sub> ,                                                                                                                                                                                                                                                                                                                                                                                                                                                                                                                                                                                                                                                                                                                                                                                                                                                                                                                                                                                                                                                                                                                                                                                                                                                                                                                                                                                                                                                                                                                                                                                                                                                                                                                                                                                                                                                                                                                                                                                                                                                                                                                                                                                                                                                                                                                                                                                                                                                                                                                                                                                                                                                                                                                                                                                                                                                                                                                                                                                                                                                                                                                                                                                                                                                                                                                                                                                                                                                                                                                                                                                                                                                                                                                              |
| <b>40</b> | Br <sub>3</sub> Cl <sub>9</sub> Cs <sub>3</sub> Re <sub>3</sub> , Cl <sub>12</sub> Cs <sub>3</sub> Re <sub>3</sub> , Cl <sub>4</sub> CsRe,                                                                                                                                                                                                                                                                                                                                                                                                                                                                                                                                                                                                                                                                                                                                                                                                                                                                                                                                                                                                                                                                                                                                                                                                                                                                                                                                                                                                                                                                                                                                                                                                                                                                                                                                                                                                                                                                                                                                                                                                                                                                                                                                                                                                                                                                                                                                                                                                                                                                                                                                                                                                                                                                                                                                                                                                                                                                                                                                                                                                                                                                                                                                                                                                                                                                                                                                                                                                                                                                                                                                                                                                                                                                                                                                                           |

Part 5 of all the predicted materials with band crossings from **Cases 1 or 2**:

|    |                                                                                                                                                                                                                                                                                                                                                                                                                                                                                                                                                                                                                                                                                                                                                                                                                                                                                                                                                                                                                                                                                                                                                                                                                                                                                                                                                                                                                                                                                                                                                                                                                                                                                                                                                                                                                                                                                                                                                                                                                                                                                                                                                                                                                                                                                                                                                                                                                                                                                                                                                                                                                                                                                                                                                                                                                                                                                                                                                                                                                                                                                                                                                                                                                                                                                                                         |
|----|-------------------------------------------------------------------------------------------------------------------------------------------------------------------------------------------------------------------------------------------------------------------------------------------------------------------------------------------------------------------------------------------------------------------------------------------------------------------------------------------------------------------------------------------------------------------------------------------------------------------------------------------------------------------------------------------------------------------------------------------------------------------------------------------------------------------------------------------------------------------------------------------------------------------------------------------------------------------------------------------------------------------------------------------------------------------------------------------------------------------------------------------------------------------------------------------------------------------------------------------------------------------------------------------------------------------------------------------------------------------------------------------------------------------------------------------------------------------------------------------------------------------------------------------------------------------------------------------------------------------------------------------------------------------------------------------------------------------------------------------------------------------------------------------------------------------------------------------------------------------------------------------------------------------------------------------------------------------------------------------------------------------------------------------------------------------------------------------------------------------------------------------------------------------------------------------------------------------------------------------------------------------------------------------------------------------------------------------------------------------------------------------------------------------------------------------------------------------------------------------------------------------------------------------------------------------------------------------------------------------------------------------------------------------------------------------------------------------------------------------------------------------------------------------------------------------------------------------------------------------------------------------------------------------------------------------------------------------------------------------------------------------------------------------------------------------------------------------------------------------------------------------------------------------------------------------------------------------------------------------------------------------------------------------------------------------------|
| 43 | AgN <sub>2</sub> NaO <sub>4</sub> , Ag <sub>2</sub> O <sub>3</sub> , AlNaP <sub>2</sub> S <sub>6</sub> , Al <sub>2</sub> Mo <sub>5</sub> , As <sub>3</sub> PbS <sub>6</sub> Tl, As <sub>4</sub> Sr <sub>3</sub> , Au <sub>2</sub> O <sub>3</sub> , BaBr <sub>2</sub> O <sub>6</sub> , BaCdSe <sub>4</sub> Sn, BaCl <sub>2</sub> O <sub>6</sub> , BaF <sub>6</sub> Te, Ba <sub>3</sub> P <sub>4</sub> , CCl <sub>2</sub> F <sub>2</sub> , Ca <sub>2</sub> GePd <sub>2</sub> , Cd <sub>7</sub> P <sub>10</sub> , Cl <sub>12</sub> HfSe <sub>2</sub> , Cl <sub>12</sub> MoSe <sub>2</sub> , Cl <sub>12</sub> Se <sub>2</sub> Zr, Cl <sub>2</sub> O <sub>2</sub> S, Cl <sub>2</sub> O <sub>6</sub> Pb, Cl <sub>2</sub> O <sub>6</sub> Sr, Cl <sub>2</sub> S <sub>2</sub> , Cs <sub>2</sub> Se, F <sub>4</sub> Pd, F <sub>4</sub> Pt, Ga <sub>2</sub> GeLi <sub>2</sub> S <sub>6</sub> , Ga <sub>2</sub> GeS <sub>6</sub> Sn, GeS <sub>2</sub> , GeSe <sub>2</sub> , HfP <sub>2</sub> S <sub>6</sub> , I <sub>4</sub> Si <sub>16</sub> Sn, InSr, N <sub>6</sub> O <sub>14</sub> Zn, Na <sub>2</sub> O <sub>6</sub> Si <sub>2</sub> Zn, O <sub>2</sub> Si, O <sub>5</sub> P <sub>2</sub> , P <sub>2</sub> S <sub>6</sub> Ti, P <sub>4</sub> Sr <sub>3</sub> , PdS <sub>4</sub> U <sub>2</sub> ,                                                                                                                                                                                                                                                                                                                                                                                                                                                                                                                                                                                                                                                                                                                                                                                                                                                                                                                                                                                                                                                                                                                                                                                                                                                                                                                                                                                                                                                                                                                                                                                                                                                                                                                                                                                                                                                                                                                                                                                                                               |
| 44 | AgNO <sub>2</sub> , Ag <sub>8</sub> S, AlF <sub>7</sub> MgNa <sub>2</sub> , Al <sub>2</sub> As <sub>2</sub> Cs <sub>2</sub> O <sub>7</sub> , AsGa, AuCaSn, AuGeNa, BBeLi, BN, BaCaGa <sub>4</sub> O <sub>8</sub> , BaN <sub>8</sub> OSi <sub>6</sub> , BaN <sub>8</sub> Si <sub>6</sub> , Ba <sub>3</sub> Se <sub>7</sub> Th, Ba <sub>5</sub> In <sub>4</sub> S <sub>7</sub> Te <sub>4</sub> , CO <sub>5</sub> U, Cl <sub>5</sub> Cs <sub>2</sub> Li <sub>3</sub> , GeLuPd, GePdY, GePtU, HgO, NNaO <sub>2</sub> , N <sub>5</sub> P <sub>3</sub> , N <sub>8</sub> Si <sub>6</sub> Sr, NaPd <sub>3</sub> Si <sub>2</sub> ,                                                                                                                                                                                                                                                                                                                                                                                                                                                                                                                                                                                                                                                                                                                                                                                                                                                                                                                                                                                                                                                                                                                                                                                                                                                                                                                                                                                                                                                                                                                                                                                                                                                                                                                                                                                                                                                                                                                                                                                                                                                                                                                                                                                                                                                                                                                                                                                                                                                                                                                                                                                                                                                                                               |
| 46 | AlF <sub>7</sub> MgNa <sub>2</sub> , Ba <sub>2</sub> GaInO <sub>5</sub> , Ba <sub>2</sub> In <sub>2</sub> O <sub>5</sub> , Ca <sub>2</sub> Ga <sub>2</sub> O <sub>5</sub> , Cd <sub>2</sub> Nb <sub>2</sub> O <sub>7</sub> , Cl <sub>9</sub> PSe, GaO <sub>5</sub> ScSr <sub>2</sub> , In <sub>2</sub> O <sub>5</sub> Sr <sub>2</sub> , NbReSi, Re-SiTa,                                                                                                                                                                                                                                                                                                                                                                                                                                                                                                                                                                                                                                                                                                                                                                                                                                                                                                                                                                                                                                                                                                                                                                                                                                                                                                                                                                                                                                                                                                                                                                                                                                                                                                                                                                                                                                                                                                                                                                                                                                                                                                                                                                                                                                                                                                                                                                                                                                                                                                                                                                                                                                                                                                                                                                                                                                                                                                                                                                |
| 48 | O <sub>2</sub> Si,                                                                                                                                                                                                                                                                                                                                                                                                                                                                                                                                                                                                                                                                                                                                                                                                                                                                                                                                                                                                                                                                                                                                                                                                                                                                                                                                                                                                                                                                                                                                                                                                                                                                                                                                                                                                                                                                                                                                                                                                                                                                                                                                                                                                                                                                                                                                                                                                                                                                                                                                                                                                                                                                                                                                                                                                                                                                                                                                                                                                                                                                                                                                                                                                                                                                                                      |
| 49 | O <sub>5</sub> Ta <sub>2</sub> ,                                                                                                                                                                                                                                                                                                                                                                                                                                                                                                                                                                                                                                                                                                                                                                                                                                                                                                                                                                                                                                                                                                                                                                                                                                                                                                                                                                                                                                                                                                                                                                                                                                                                                                                                                                                                                                                                                                                                                                                                                                                                                                                                                                                                                                                                                                                                                                                                                                                                                                                                                                                                                                                                                                                                                                                                                                                                                                                                                                                                                                                                                                                                                                                                                                                                                        |
| 50 | C, O <sub>2</sub> Si,                                                                                                                                                                                                                                                                                                                                                                                                                                                                                                                                                                                                                                                                                                                                                                                                                                                                                                                                                                                                                                                                                                                                                                                                                                                                                                                                                                                                                                                                                                                                                                                                                                                                                                                                                                                                                                                                                                                                                                                                                                                                                                                                                                                                                                                                                                                                                                                                                                                                                                                                                                                                                                                                                                                                                                                                                                                                                                                                                                                                                                                                                                                                                                                                                                                                                                   |
| 51 | AgBrHgS, AgHgIS, AlPt <sub>2</sub> , As <sub>2</sub> Br <sub>2</sub> Cd <sub>2</sub> Hg <sub>2</sub> , AuCsTe, AuTe <sub>2</sub> , AuRbTe, Au <sub>3</sub> Rb <sub>2</sub> Tl, BLi, BaNb <sub>2</sub> O <sub>6</sub> , BiPd <sub>3</sub> , Br <sub>11</sub> CsNb <sub>4</sub> , Br <sub>11</sub> Nb <sub>4</sub> Rb, Br <sub>6</sub> CaTh, Br <sub>6</sub> SrTh, CB <sub>2</sub> U, C <sub>3</sub> AlY <sub>3</sub> , C <sub>3</sub> I <sub>6</sub> OY <sub>7</sub> , Ca <sub>5</sub> P <sub>6</sub> Pd <sub>6</sub> , CdMg, Cl <sub>11</sub> CsNb <sub>4</sub> , Cl <sub>11</sub> Nb <sub>4</sub> Rb, Cl <sub>19</sub> LiNb <sub>6</sub> , Cl <sub>2</sub> Mg, GaPt <sub>2</sub> , K <sub>2</sub> S, La <sub>2</sub> Se <sub>9</sub> U <sub>2</sub> , MoPt, O <sub>5</sub> U <sub>2</sub> , PdTi, PtTi,                                                                                                                                                                                                                                                                                                                                                                                                                                                                                                                                                                                                                                                                                                                                                                                                                                                                                                                                                                                                                                                                                                                                                                                                                                                                                                                                                                                                                                                                                                                                                                                                                                                                                                                                                                                                                                                                                                                                                                                                                                                                                                                                                                                                                                                                                                                                                                                                                                                                                                                |
| 52 | Ag <sub>4</sub> Bi <sub>2</sub> O <sub>5</sub> , Ag <sub>6</sub> BaO <sub>4</sub> , Ag <sub>6</sub> O <sub>4</sub> Sr, Al <sub>2</sub> Ba <sub>3</sub> N <sub>4</sub> , Al <sub>2</sub> N <sub>4</sub> Sr <sub>3</sub> , AsGeSe, As <sub>4</sub> Ga <sub>3</sub> K <sub>3</sub> , BaCl <sub>4</sub> Zn, Ba <sub>3</sub> Ga <sub>2</sub> N <sub>4</sub> , Ba <sub>3</sub> GeMgN <sub>4</sub> , BiNbO <sub>4</sub> , BiO <sub>4</sub> Ta, Bi <sub>3</sub> BrO <sub>4</sub> , Br <sub>4</sub> Ga <sub>2</sub> , Br <sub>4</sub> InK, Br <sub>4</sub> In <sub>2</sub> , Br <sub>4</sub> KTL, Br <sub>4</sub> Tl <sub>2</sub> , Ca <sub>2</sub> GeIn <sub>2</sub> Sr, Cl <sub>4</sub> Ga <sub>2</sub> , FO <sub>3</sub> ScTe, F <sub>7</sub> HfKpd, F <sub>7</sub> KPdZr, Ga <sub>2</sub> N <sub>4</sub> Sr <sub>3</sub> , GeMgN <sub>4</sub> Sr <sub>3</sub> , Hf <sub>2</sub> K <sub>2</sub> O <sub>5</sub> , I <sub>4</sub> In <sub>2</sub> , K <sub>2</sub> O <sub>5</sub> Zr <sub>2</sub> , LiO <sub>3</sub> Sb, NbO <sub>4</sub> Sb, O <sub>4</sub> SnW,                                                                                                                                                                                                                                                                                                                                                                                                                                                                                                                                                                                                                                                                                                                                                                                                                                                                                                                                                                                                                                                                                                                                                                                                                                                                                                                                                                                                                                                                                                                                                                                                                                                                                                                                                                                                                                                                                                                                                                                                                                                                                                                                                                                                                                                               |
| 53 | AgISe <sub>3</sub> , AgITe <sub>3</sub> , F <sub>7</sub> KSnZr,                                                                                                                                                                                                                                                                                                                                                                                                                                                                                                                                                                                                                                                                                                                                                                                                                                                                                                                                                                                                                                                                                                                                                                                                                                                                                                                                                                                                                                                                                                                                                                                                                                                                                                                                                                                                                                                                                                                                                                                                                                                                                                                                                                                                                                                                                                                                                                                                                                                                                                                                                                                                                                                                                                                                                                                                                                                                                                                                                                                                                                                                                                                                                                                                                                                         |
| 54 | AgClO <sub>2</sub> , Au <sub>2</sub> Cd <sub>2</sub> Rb <sub>2</sub> S <sub>4</sub> , BiGaO <sub>3</sub> , ClF <sub>8</sub> Nb, ClF <sub>8</sub> Ta, O <sub>2</sub> Si,                                                                                                                                                                                                                                                                                                                                                                                                                                                                                                                                                                                                                                                                                                                                                                                                                                                                                                                                                                                                                                                                                                                                                                                                                                                                                                                                                                                                                                                                                                                                                                                                                                                                                                                                                                                                                                                                                                                                                                                                                                                                                                                                                                                                                                                                                                                                                                                                                                                                                                                                                                                                                                                                                                                                                                                                                                                                                                                                                                                                                                                                                                                                                 |
| 55 | AgAsHg <sub>2</sub> O <sub>4</sub> , AgK <sub>5</sub> N <sub>2</sub> O <sub>6</sub> , AlGeO <sub>5</sub> Y, Al <sub>2</sub> Bi <sub>6</sub> Ca <sub>5</sub> , Al <sub>2</sub> Ca <sub>5</sub> Sb <sub>6</sub> , Al <sub>4</sub> Bi <sub>2</sub> O <sub>9</sub> , Al <sub>5</sub> NaO <sub>12</sub> Ti <sub>2</sub> , AsKS <sub>5</sub> Sn, As <sub>2</sub> F <sub>16</sub> MgXe <sub>2</sub> , As <sub>2</sub> Ge, As <sub>2</sub> O <sub>6</sub> Zn <sub>3</sub> , As <sub>2</sub> Si, As <sub>3</sub> Ca <sub>4</sub> , As <sub>3</sub> Sr <sub>4</sub> , As <sub>6</sub> Ca <sub>5</sub> Ga <sub>2</sub> , As <sub>6</sub> Ca <sub>5</sub> Sn <sub>2</sub> , As <sub>6</sub> Sn <sub>2</sub> Sr <sub>5</sub> , Au <sub>2</sub> K <sub>5</sub> O <sub>2</sub> , Au <sub>3</sub> O <sub>2</sub> Rb <sub>5</sub> , BTa <sub>4</sub> Te <sub>8</sub> , B <sub>4</sub> MoU, B <sub>4</sub> MoY, B <sub>4</sub> UW, B <sub>4</sub> WY, B <sub>6</sub> ReSc <sub>2</sub> , B <sub>6</sub> ReY <sub>2</sub> , B <sub>6</sub> U <sub>2</sub> W, BaNb <sub>8</sub> O <sub>14</sub> , Ba <sub>3</sub> OSb <sub>2</sub> , Ba <sub>5</sub> In <sub>2</sub> Sb <sub>6</sub> , Bi <sub>2</sub> Ga <sub>4</sub> O <sub>9</sub> , Bi <sub>6</sub> In <sub>2</sub> Sr <sub>5</sub> , Bi <sub>8</sub> Ca <sub>3</sub> Pd <sub>4</sub> , Br <sub>5</sub> Nb, CB <sub>2</sub> Lu, C <sub>2</sub> B <sub>2</sub> Sc, C <sub>5</sub> Y <sub>4</sub> , CaGe <sub>2</sub> O <sub>5</sub> , Ca <sub>2</sub> O <sub>4</sub> Pb, Ca <sub>3</sub> O <sub>6</sub> Tl <sub>2</sub> , Ca <sub>5</sub> Ga <sub>2</sub> Sb <sub>6</sub> , Ca <sub>5</sub> In <sub>2</sub> Sb <sub>6</sub> , CdCl <sub>4</sub> Na <sub>2</sub> , CdO <sub>4</sub> U, Cd <sub>2</sub> I <sub>7</sub> Tl <sub>3</sub> , Cd <sub>2</sub> O <sub>4</sub> Sn, Cd <sub>7</sub> Th <sub>6</sub> , Cl <sub>4</sub> MgNa <sub>2</sub> , Cl <sub>4</sub> Na <sub>2</sub> Ti, Cs <sub>2</sub> Te <sub>2</sub> , Ga <sub>2</sub> Mg, Ga <sub>5</sub> NaO <sub>12</sub> Ti <sub>2</sub> , HfO <sub>3</sub> Pb, HfReSi <sub>2</sub> , I <sub>6</sub> PbTl <sub>4</sub> , InLa <sub>2</sub> Si <sub>2</sub> , In <sub>2</sub> Sb <sub>6</sub> Sr <sub>5</sub> , In <sub>3</sub> NaS <sub>5</sub> , La <sub>2</sub> S <sub>5</sub> Sn, Li <sub>7</sub> Si <sub>2</sub> , Mg <sub>2</sub> O <sub>4</sub> Si, Na <sub>2</sub> O <sub>4</sub> U, Nb <sub>2</sub> Pd <sub>3</sub> Se <sub>8</sub> , Nb <sub>4</sub> SiTe <sub>4</sub> , Nb <sub>8</sub> O <sub>14</sub> Sr, O <sub>2</sub> Se, O <sub>3</sub> PbZr, O <sub>4</sub> Pb <sub>2</sub> Pt, O <sub>4</sub> Pb <sub>3</sub> , O <sub>6</sub> Sr <sub>3</sub> Tl <sub>2</sub> , O <sub>8</sub> W <sub>3</sub> , P <sub>6</sub> Sn <sub>2</sub> Sr <sub>5</sub> , Pb <sub>4</sub> S <sub>11</sub> Sb <sub>4</sub> , PdSe <sub>2</sub> Tl <sub>2</sub> , Pd <sub>3</sub> Se <sub>8</sub> Ta <sub>2</sub> , Pt <sub>3</sub> S <sub>8</sub> Ta <sub>2</sub> , Pt <sub>3</sub> Sc <sub>2</sub> Si <sub>2</sub> , Pt <sub>3</sub> Se <sub>8</sub> Ta <sub>2</sub> , Pt <sub>7</sub> Sc <sub>4</sub> Si <sub>2</sub> , Pt <sub>7</sub> Zn <sub>12</sub> , Rb <sub>2</sub> Te <sub>2</sub> , ReSi <sub>2</sub> Zr, Se <sub>2</sub> Ti <sub>9</sub> , Se <sub>9</sub> Sn <sub>2</sub> Sr <sub>4</sub> , SiTa <sub>4</sub> Te <sub>4</sub> , |
| 56 | BiLiO <sub>3</sub> , Bi <sub>2</sub> O <sub>3</sub> , Cl <sub>6</sub> Se <sub>4</sub> Zr, I <sub>11</sub> Nb <sub>6</sub> , Li <sub>2</sub> O <sub>5</sub> Te <sub>2</sub> , Na <sub>2</sub> O <sub>4</sub> U, O <sub>2</sub> Si, O <sub>3</sub> Sb <sub>2</sub> , O <sub>4</sub> SnSr <sub>2</sub> ,                                                                                                                                                                                                                                                                                                                                                                                                                                                                                                                                                                                                                                                                                                                                                                                                                                                                                                                                                                                                                                                                                                                                                                                                                                                                                                                                                                                                                                                                                                                                                                                                                                                                                                                                                                                                                                                                                                                                                                                                                                                                                                                                                                                                                                                                                                                                                                                                                                                                                                                                                                                                                                                                                                                                                                                                                                                                                                                                                                                                                   |
| 57 | AgNbO <sub>3</sub> , AlLu, AsCa <sub>2</sub> ClO <sub>4</sub> , AsKO <sub>2</sub> , AsNa <sub>5</sub> O <sub>5</sub> , AsO <sub>2</sub> Rb, As <sub>2</sub> Cl <sub>3</sub> Hg <sub>3</sub> Tl, AuCs <sub>2</sub> PS <sub>4</sub> , AuLaO <sub>3</sub> , AuRb <sub>2</sub> S <sub>4</sub> Sb, BaF <sub>4</sub> OTi, BaF <sub>5</sub> Sb, Bi <sub>3</sub> F <sub>6</sub> N, Br <sub>3</sub> Hg <sub>3</sub> Sb <sub>2</sub> Tl, Br <sub>5</sub> P, CaNb <sub>2</sub> O <sub>4</sub> , Ca <sub>3</sub> Ga <sub>2</sub> Pd <sub>2</sub> , Ca <sub>3</sub> Ga <sub>2</sub> Pt <sub>2</sub> , Cl <sub>6</sub> HfTe <sub>6</sub> , Cl <sub>6</sub> Te <sub>6</sub> Zr, Cl <sub>7</sub> Re <sub>3</sub> Se <sub>7</sub> , CsP <sub>7</sub> , Cs <sub>2</sub> Te <sub>13</sub> , F <sub>5</sub> KTe, F <sub>5</sub> SbSr, F <sub>9</sub> SbSn <sub>3</sub> , GaLaOS <sub>2</sub> , HgK <sub>2</sub> S <sub>2</sub> , La <sub>2</sub> O <sub>2</sub> S <sub>2</sub> , Li <sub>2</sub> O <sub>7</sub> Si <sub>3</sub> , N <sub>5</sub> NbSr <sub>5</sub> , NaNbO <sub>3</sub> , NaO <sub>4</sub> TiY,                                                                                                                                                                                                                                                                                                                                                                                                                                                                                                                                                                                                                                                                                                                                                                                                                                                                                                                                                                                                                                                                                                                                                                                                                                                                                                                                                                                                                                                                                                                                                                                                                                                                                                                                                                                                                                                                                                                                                                                                                                                                                                                                                                                                                             |

Part 6 of all the predicted materials with band crossings from **Cases 1 or 2**:

|    |                                                                                                                                                                                                                                                                                                                                                                                                                                                                                                                                                                                                                                                                                                                                                                                                                                                                                                                                                                                                                                                                                                                                                                                                                                                                                                                                                                                                                                                                                                                                                                                                                                                                                                                                                                                                                                                                                                                                                                                                                                                                                                                                                                   |
|----|-------------------------------------------------------------------------------------------------------------------------------------------------------------------------------------------------------------------------------------------------------------------------------------------------------------------------------------------------------------------------------------------------------------------------------------------------------------------------------------------------------------------------------------------------------------------------------------------------------------------------------------------------------------------------------------------------------------------------------------------------------------------------------------------------------------------------------------------------------------------------------------------------------------------------------------------------------------------------------------------------------------------------------------------------------------------------------------------------------------------------------------------------------------------------------------------------------------------------------------------------------------------------------------------------------------------------------------------------------------------------------------------------------------------------------------------------------------------------------------------------------------------------------------------------------------------------------------------------------------------------------------------------------------------------------------------------------------------------------------------------------------------------------------------------------------------------------------------------------------------------------------------------------------------------------------------------------------------------------------------------------------------------------------------------------------------------------------------------------------------------------------------------------------------|
| 57 | OPb, O <sub>5</sub> TeU, STa <sub>2</sub> ,                                                                                                                                                                                                                                                                                                                                                                                                                                                                                                                                                                                                                                                                                                                                                                                                                                                                                                                                                                                                                                                                                                                                                                                                                                                                                                                                                                                                                                                                                                                                                                                                                                                                                                                                                                                                                                                                                                                                                                                                                                                                                                                       |
| 58 | Ag <sub>5</sub> O <sub>4</sub> Si, Al <sub>2</sub> O <sub>5</sub> Si, AsTa <sub>2</sub> , As <sub>2</sub> Ti, As <sub>4</sub> Ca <sub>3</sub> In <sub>2</sub> , AuKNa <sub>2</sub> O <sub>2</sub> , AuNa <sub>2</sub> O <sub>2</sub> Rb, Au <sub>8</sub> Sn <sub>3</sub> Sr <sub>3</sub> , B, B <sub>28</sub> , B <sub>2</sub> CaLi <sub>4</sub> O <sub>6</sub> , B <sub>2</sub> Cd <sub>3</sub> O <sub>6</sub> , B <sub>2</sub> Mg <sub>3</sub> O <sub>6</sub> , Bi <sub>2</sub> Hf, Bi <sub>2</sub> O <sub>2</sub> S, Bi <sub>2</sub> Zr, Bi <sub>3</sub> RbS <sub>5</sub> , Br <sub>16</sub> Ti <sub>7</sub> , Br <sub>2</sub> Ca, CO <sub>2</sub> , C <sub>2</sub> B <sub>2</sub> Mg, C <sub>3</sub> Al <sub>2</sub> Th <sub>2</sub> , C <sub>3</sub> Mg <sub>2</sub> , CaCl <sub>2</sub> , Ca <sub>2</sub> Ge <sub>3</sub> Li, Ca <sub>2</sub> LiSi <sub>3</sub> , Cl <sub>16</sub> Ti <sub>7</sub> , ClGaTe, Cl <sub>2</sub> Pd, Cl <sub>2</sub> Pt, Cl <sub>5</sub> NaSn <sub>2</sub> , Cl <sub>5</sub> Nb <sub>3</sub> O <sub>2</sub> , F <sub>12</sub> GeS <sub>2</sub> , F <sub>2</sub> Mg, F <sub>4</sub> Mg <sub>10</sub> O <sub>14</sub> Si <sub>3</sub> , GaLi <sub>3</sub> Na <sub>2</sub> O <sub>4</sub> , GeO <sub>2</sub> , Ge <sub>6</sub> Li <sub>2</sub> Sr <sub>4</sub> , HfSb <sub>2</sub> , I <sub>2</sub> Li <sub>5</sub> S <sub>3</sub> Sb, I <sub>2</sub> Pd, InK <sub>2</sub> Na <sub>3</sub> O <sub>4</sub> , InNa <sub>3</sub> O <sub>4</sub> Rb <sub>2</sub> , InS, In <sub>2</sub> P <sub>4</sub> Sr <sub>3</sub> , In <sub>2</sub> Se, In <sub>2</sub> Te, In <sub>4</sub> Se <sub>3</sub> , In <sub>4</sub> Te <sub>3</sub> , K <sub>2</sub> Na <sub>3</sub> O <sub>4</sub> Tl, La <sub>2</sub> Mo <sub>2</sub> O <sub>7</sub> , La <sub>3</sub> LuSe <sub>6</sub> , Li <sub>3</sub> N <sub>4</sub> NbSr <sub>2</sub> , Li <sub>3</sub> N <sub>4</sub> Sr <sub>2</sub> Ta, N <sub>2</sub> Pd, N <sub>2</sub> Pt, O <sub>2</sub> Pt, O <sub>2</sub> Sn, P <sub>9</sub> Zr <sub>14</sub> , S <sub>12</sub> , STi <sub>2</sub> , SZr <sub>2</sub> , S <sub>2</sub> Ti, Sb <sub>2</sub> Zr, SeTi <sub>2</sub> , SeZr <sub>2</sub> , |
| 59 | Ag <sub>3</sub> Sb, AlClO, AlF <sub>4</sub> Rb, AlLi <sub>5</sub> O <sub>4</sub> , AsCl <sub>5</sub> , AsKLi <sub>2</sub> , AsLiMo <sub>2</sub> O <sub>9</sub> , As <sub>5</sub> K <sub>6</sub> Sn <sub>3</sub> , AuCs <sub>3</sub> Ge <sub>4</sub> , AuCs <sub>3</sub> Pb <sub>4</sub> , AuCs <sub>3</sub> Sn <sub>4</sub> , AuGe <sub>4</sub> K <sub>3</sub> , AuGe <sub>4</sub> Rb <sub>3</sub> , AuK <sub>3</sub> Sn <sub>4</sub> , AuPb <sub>4</sub> Rb <sub>3</sub> , AuRb <sub>3</sub> Sn <sub>4</sub> , Au <sub>21</sub> K <sub>12</sub> Sn <sub>4</sub> , Au <sub>3</sub> In, Au <sub>3</sub> In <sub>3</sub> Sr, Au <sub>3</sub> KSn <sub>3</sub> , Au <sub>3</sub> Lu, Au <sub>4</sub> S <sub>3</sub> Tl <sub>2</sub> , BCsNa <sub>2</sub> O <sub>3</sub> , BKNa <sub>2</sub> O <sub>3</sub> , BNa <sub>2</sub> O <sub>3</sub> Rb, BaLi <sub>2</sub> Si, BaO <sub>9</sub> Ti <sub>4</sub> , Ba <sub>5</sub> In <sub>4</sub> Sb <sub>6</sub> , Ba <sub>6</sub> Ge <sub>5</sub> N <sub>2</sub> , BrHfN, BrInO, BrLuS, BrNTi, BrNZr, BrOSc, Br <sub>3</sub> Mo, CAgNO, CBiCaFO <sub>4</sub> , CBrN, CCaO <sub>3</sub> , CClN, CO <sub>5</sub> U, C <sub>2</sub> B <sub>2</sub> Be, CdS, ClInO, ClNTi, Cl <sub>7</sub> Mo <sub>2</sub> O <sub>2</sub> Tl, CsIn <sub>7</sub> S <sub>9</sub> , FNTi, F <sub>3</sub> La, F <sub>4</sub> KSb, GeNa <sub>2</sub> O <sub>5</sub> Ti, Ge <sub>5</sub> N <sub>2</sub> Sr <sub>6</sub> , Hg <sub>3</sub> Pd <sub>8</sub> Se <sub>9</sub> , INTi, INZr, I <sub>3</sub> Ti, I <sub>3</sub> Zr, InNa <sub>5</sub> O <sub>4</sub> , InSb, Li <sub>5</sub> N <sub>4</sub> Re, NaNbO <sub>3</sub> , NaNb <sub>3</sub> O <sub>8</sub> , Pb <sub>2</sub> Pd <sub>3</sub> Te <sub>2</sub> , PdSiY,                                                                                                                                                                                                                                                                                                                                                                                                                           |
| 60 | Ag <sub>3</sub> S <sub>2</sub> Tl, AlCl <sub>4</sub> Hg <sub>2</sub> Sb, AlO <sub>4</sub> Ta, Al <sub>2</sub> Ca <sub>2</sub> O <sub>9</sub> Sn <sub>2</sub> , Al <sub>2</sub> O <sub>3</sub> , As <sub>11</sub> K <sub>3</sub> , As <sub>11</sub> Rb <sub>3</sub> , AsKO <sub>3</sub> , Au <sub>2</sub> F <sub>12</sub> Hg, Au <sub>2</sub> Pb, BaCl <sub>4</sub> Pd, BaCl <sub>4</sub> Zn, BaN <sub>2</sub> O <sub>2</sub> Si <sub>2</sub> , Ba <sub>8</sub> Si <sub>6</sub> Sn, Bi <sub>2</sub> CdGeO <sub>6</sub> , Bi <sub>2</sub> O <sub>3</sub> , BrHg <sub>2</sub> P <sub>3</sub> , CW <sub>2</sub> , CaCl <sub>2</sub> , CaNb <sub>2</sub> O <sub>6</sub> , CaO <sub>4</sub> Te, Ca <sub>3</sub> N <sub>2</sub> , CdK <sub>2</sub> O <sub>2</sub> , CdO <sub>2</sub> Rb <sub>2</sub> , Cl <sub>3</sub> CsLi <sub>2</sub> , Cl <sub>4</sub> LuNa, Cl <sub>4</sub> NaSc, F <sub>2</sub> Zn, F <sub>4</sub> InLi, F <sub>4</sub> Na <sub>2</sub> O <sub>2</sub> W, F <sub>6</sub> NaRbSn, GeO <sub>2</sub> , Hg <sub>3</sub> Rb <sub>2</sub> Te <sub>4</sub> , I <sub>2</sub> O <sub>6</sub> Pb, In <sub>2</sub> O <sub>3</sub> , KMo <sub>2</sub> O <sub>8</sub> Y, K <sub>3</sub> P <sub>11</sub> , LiO <sub>6</sub> SbW, Li <sub>2</sub> O <sub>5</sub> Si <sub>2</sub> , MgNb <sub>2</sub> O <sub>6</sub> , MgO <sub>3</sub> Si, MgO <sub>5</sub> Te <sub>2</sub> , Mg <sub>2</sub> O <sub>6</sub> Si <sub>2</sub> , N <sub>4</sub> S <sub>4</sub> , Na <sub>2</sub> O <sub>2</sub> Pb, Na <sub>2</sub> O <sub>4</sub> Te, Na <sub>2</sub> O <sub>5</sub> Si <sub>2</sub> , Na <sub>2</sub> O <sub>9</sub> Si <sub>2</sub> Ti <sub>2</sub> , Na <sub>2</sub> Te <sub>2</sub> , Na <sub>3</sub> P <sub>11</sub> , Nb <sub>2</sub> O <sub>6</sub> Zn, O <sub>2</sub> Pb, O <sub>2</sub> Sn, O <sub>2</sub> Ti, O <sub>3</sub> W, O <sub>4</sub> SrTe, O <sub>5</sub> Se <sub>2</sub> Zn, O <sub>6</sub> Ta <sub>2</sub> Zn, P <sub>11</sub> Rb <sub>3</sub> , PPdS, PPdSe, S <sub>5</sub> Th <sub>2</sub> , Se <sub>5</sub> Th <sub>2</sub> ,                                                                                                             |
| 61 | AgIO <sub>3</sub> , Al <sub>2</sub> Cl <sub>8</sub> Te <sub>4</sub> , AsCd, AsCsSe <sub>2</sub> , AsNaO <sub>2</sub> , AsNaSe <sub>2</sub> , AsS <sub>3</sub> Tl <sub>3</sub> , AsZn, As <sub>3</sub> LaSi, AuSn <sub>2</sub> , Au <sub>3</sub> Ca <sub>7</sub> , B <sub>2</sub> Cl <sub>4</sub> , Ba <sub>2</sub> In <sub>2</sub> Se <sub>5</sub> , Ba <sub>2</sub> Nb <sub>2</sub> O <sub>10</sub> Te, Bi <sub>2</sub> MoO <sub>6</sub> , Bi <sub>2</sub> Pt, Br <sub>5</sub> PdTi <sub>3</sub> , Br <sub>8</sub> Cs <sub>2</sub> Re <sub>2</sub> , C <sub>2</sub> N <sub>2</sub> , C <sub>2</sub> N <sub>2</sub> S, CaN <sub>2</sub> Si, Ca <sub>4</sub> O <sub>10</sub> Ti <sub>3</sub> , CdSb, ClF <sub>3</sub> KSb, ClO <sub>2</sub> , Cl <sub>2</sub> PdSe <sub>8</sub> , Cl <sub>4</sub> Hg <sub>3</sub> Te, FOSb, GaNaO <sub>2</sub> , Ga <sub>2</sub> O <sub>5</sub> Sr <sub>2</sub> , GeLaSe <sub>4</sub> Tl, HfO <sub>2</sub> , HfRb <sub>2</sub> S <sub>4</sub> , HgNa <sub>2</sub> S <sub>2</sub> , HgO <sub>2</sub> , Hg <sub>3</sub> Na <sub>2</sub> S <sub>4</sub> , I <sub>2</sub> O <sub>6</sub> Pd, I <sub>2</sub> Sr, I <sub>4</sub> Pt, K <sub>2</sub> S <sub>4</sub> Zr, LaO <sub>4</sub> Ta, Lu <sub>2</sub> O <sub>4</sub> Pd, Na <sub>2</sub> O <sub>4</sub> U, O <sub>2</sub> Sn, O <sub>2</sub> Te, O <sub>2</sub> Ti, O <sub>2</sub> U, O <sub>3</sub> SeZn, O <sub>3</sub> TeZn, P <sub>4</sub> Re, PdS <sub>2</sub> , PdSe <sub>2</sub> , PtSbSi, PtSiTe, Re <sub>2</sub> Te <sub>5</sub> , Re <sub>6</sub> Se <sub>8</sub> Te <sub>7</sub> , Re <sub>6</sub> Te <sub>15</sub> , S <sub>9</sub> Sb <sub>2</sub> Sn <sub>5</sub> , SbZn,                                                                                                                                                                                                                                                                                                                                                                                                                                                                                            |
| 62 | AgBr <sub>3</sub> Cs <sub>2</sub> , AgBr <sub>3</sub> Rb <sub>2</sub> , AgCaSb, AgClO <sub>4</sub> , AgCl <sub>3</sub> Cs <sub>2</sub> , AgCl <sub>3</sub> Rb <sub>2</sub> , AgCs <sub>2</sub> I <sub>3</sub> , AgI <sub>3</sub> K <sub>2</sub> , AgI <sub>3</sub> Rb <sub>2</sub> , AgSTl, AgSeTl, AgTe, AgTeTl, Ag <sub>2</sub> BaTe <sub>2</sub> , Ag <sub>2</sub> CsI <sub>3</sub> , Ag <sub>3</sub> AsSe <sub>3</sub> , AlAs <sub>3</sub> Ca <sub>3</sub> , AlAuCa, AlBMgO <sub>4</sub> , AlBr <sub>4</sub> Cs, AlCa <sub>2</sub> F <sub>7</sub> , AlCa <sub>3</sub> Sb <sub>3</sub> , AlCdF <sub>6</sub> Na, AlCl <sub>4</sub> Cs, AlCl <sub>4</sub> In, AlCl <sub>4</sub> Tl, AlCsF <sub>6</sub> Pd, AlF <sub>4</sub> K, AlF <sub>6</sub> PdRb, AlI <sub>4</sub> Na, AlKSb <sub>4</sub> , Al-LaPt, AlLuPt, AlO <sub>3</sub> Sc, AlO <sub>3</sub> Y, AlP <sub>3</sub> Si, AlPdY, AlPtY, Al <sub>2</sub> As <sub>4</sub> Ba <sub>3</sub> , Al <sub>2</sub> BaGe <sub>2</sub> , Al <sub>2</sub> BaSi <sub>2</sub> , Al <sub>2</sub> Ba <sub>3</sub> P <sub>4</sub> , Al <sub>2</sub> BeO <sub>4</sub> , Al <sub>2</sub> CaO <sub>4</sub> , Al <sub>2</sub> Ca <sub>3</sub> Ge <sub>3</sub> , Al <sub>2</sub> F <sub>2</sub> GeO <sub>4</sub> , Al <sub>2</sub> F <sub>2</sub> O <sub>4</sub> Si, Al <sub>2</sub> MgO <sub>4</sub> , Al <sub>2</sub> O <sub>5</sub> Si, Al <sub>2</sub> Sb <sub>6</sub> Sr <sub>5</sub> , Al <sub>3</sub> ITe <sub>3</sub> , AsBaKO <sub>4</sub> , AsBa <sub>2</sub> GaSe <sub>5</sub> , AsCaLi, AsCaNaO <sub>4</sub> ,                                                                                                                                                                                                                                                                                                                                                                                                                                                                                                                                                                                                        |

Part 7 of all the predicted materials with band crossings from **Cases 1 or 2**:

|    |                                                                                                                                                                                                                                                                                                                                                                                                                                                                                                                                                                                                                                                                                                                                                                                                                                                                                                                                                                                                                                                                                                                                                                                                                                                                                                                                                                                                                                                                                                                                                                                                                                                                                                                                                                                                                                                                                                                                                                                                                                                                                                                                                                                                                                                                                                                                                                                                                                                                                                                                                                                                                                                                                                                                                                                                                                                                                                                                                                                                                                                                                                                                                                                                                                                                                                                                                                                                                                                                                                                                                                                                                                                                                                                                                                                                                                                                                                                                                                                                                                                                                                                                                                                                                                                                                                                                                                                                                                                                                                                                                                                                                                                                                                                                                                                                                                                                                                                                                                                                                                                                                                                                                                                                                                                                                                                                                                                                                                                                                                                                                                                                                                                                                                                                                                                                                                                                                                                                                                                                                                                                                                                                                                                                                                                                                                                                                                                                                                                                                                                                                                                                                                                                                                                                                                                                                                                                                                                                                                                                                                                                                                                                                                                                                                                                                                                                                                                                                                                                                                                                                                                                                                                                                                                                                                                                                                                                                                                                                                                                                                                                                                                                                                                                                                                                                                                                                                                                                                                                                                                                                                                                                                                                                                                                                                                                                                                                                                                                                      |
|----|------------------------------------------------------------------------------------------------------------------------------------------------------------------------------------------------------------------------------------------------------------------------------------------------------------------------------------------------------------------------------------------------------------------------------------------------------------------------------------------------------------------------------------------------------------------------------------------------------------------------------------------------------------------------------------------------------------------------------------------------------------------------------------------------------------------------------------------------------------------------------------------------------------------------------------------------------------------------------------------------------------------------------------------------------------------------------------------------------------------------------------------------------------------------------------------------------------------------------------------------------------------------------------------------------------------------------------------------------------------------------------------------------------------------------------------------------------------------------------------------------------------------------------------------------------------------------------------------------------------------------------------------------------------------------------------------------------------------------------------------------------------------------------------------------------------------------------------------------------------------------------------------------------------------------------------------------------------------------------------------------------------------------------------------------------------------------------------------------------------------------------------------------------------------------------------------------------------------------------------------------------------------------------------------------------------------------------------------------------------------------------------------------------------------------------------------------------------------------------------------------------------------------------------------------------------------------------------------------------------------------------------------------------------------------------------------------------------------------------------------------------------------------------------------------------------------------------------------------------------------------------------------------------------------------------------------------------------------------------------------------------------------------------------------------------------------------------------------------------------------------------------------------------------------------------------------------------------------------------------------------------------------------------------------------------------------------------------------------------------------------------------------------------------------------------------------------------------------------------------------------------------------------------------------------------------------------------------------------------------------------------------------------------------------------------------------------------------------------------------------------------------------------------------------------------------------------------------------------------------------------------------------------------------------------------------------------------------------------------------------------------------------------------------------------------------------------------------------------------------------------------------------------------------------------------------------------------------------------------------------------------------------------------------------------------------------------------------------------------------------------------------------------------------------------------------------------------------------------------------------------------------------------------------------------------------------------------------------------------------------------------------------------------------------------------------------------------------------------------------------------------------------------------------------------------------------------------------------------------------------------------------------------------------------------------------------------------------------------------------------------------------------------------------------------------------------------------------------------------------------------------------------------------------------------------------------------------------------------------------------------------------------------------------------------------------------------------------------------------------------------------------------------------------------------------------------------------------------------------------------------------------------------------------------------------------------------------------------------------------------------------------------------------------------------------------------------------------------------------------------------------------------------------------------------------------------------------------------------------------------------------------------------------------------------------------------------------------------------------------------------------------------------------------------------------------------------------------------------------------------------------------------------------------------------------------------------------------------------------------------------------------------------------------------------------------------------------------------------------------------------------------------------------------------------------------------------------------------------------------------------------------------------------------------------------------------------------------------------------------------------------------------------------------------------------------------------------------------------------------------------------------------------------------------------------------------------------------------------------------------------------------------------------------------------------------------------------------------------------------------------------------------------------------------------------------------------------------------------------------------------------------------------------------------------------------------------------------------------------------------------------------------------------------------------------------------------------------------------------------------------------------------------------------------------------------------------------------------------------------------------------------------------------------------------------------------------------------------------------------------------------------------------------------------------------------------------------------------------------------------------------------------------------------------------------------------------------------------------------------------------------------------------------------------------------------------------------------------------------------------------------------------------------------------------------------------------------------------------------------------------------------------------------------------------------------------------------------------------------------------------------------------------------------------------------------------------------------------------------------------------------------------------------------------------------------------------------------------------------------------------------------------------------------------------------------------------------------------------------------------------------------------------------------------------------------------------------------------------------------------------------------------------------------------------------------------------------------------------------------------------------------------------------------------------------------------------|
| 62 | <p>AsCaPd, AsCa<sub>3</sub>N, <b>AsCdNa</b>, AsCd<sub>3</sub>Cl<sub>3</sub>, AsCs<sub>3</sub>Se<sub>4</sub>, AsKMoO<sub>6</sub>, AsK<sub>3</sub>Se<sub>4</sub>, AsLaTe, AsLiMgO<sub>4</sub>, AsLiO<sub>5</sub>Ti, AsLiSr, AsRb<sub>3</sub>Se<sub>4</sub>, AsS<sub>4</sub>Tl<sub>3</sub>, AsSe<sub>4</sub>Tl<sub>3</sub>, As<sub>2</sub>BaZn<sub>2</sub>, As<sub>2</sub>CsSe<sub>3</sub>, <b>As<sub>2</sub>Hf</b>, <b>As<sub>2</sub>Hf<sub>3</sub></b>, As<sub>2</sub>K<sub>4</sub>Te<sub>4</sub>, As<sub>2</sub>O<sub>4</sub>, As<sub>2</sub>Th, <b>As<sub>2</sub>Zr</b>, As<sub>3</sub>Ba<sub>3</sub>In, As<sub>3</sub>Ca<sub>3</sub>Ga, As<sub>3</sub>ClO<sub>6</sub>Pb<sub>2</sub>, As<sub>3</sub>Cs<sub>5</sub>Ge, As<sub>3</sub>GeKNa<sub>4</sub>, As<sub>3</sub>Hf<sub>5</sub>, As<sub>3</sub>K<sub>5</sub>Pb<sub>3</sub>, As<sub>3</sub>LaZn<sub>3</sub>, <b>As<sub>3</sub>Nb<sub>5</sub></b>, As<sub>3</sub>OSr<sub>3</sub>Ta, As<sub>3</sub>Rb<sub>5</sub>Si, <b>As<sub>3</sub>Sc<sub>5</sub></b>, As<sub>4</sub>Cd<sub>2</sub>Ge, As<sub>4</sub>K<sub>6</sub>NbTl, As<sub>4</sub>S<sub>3</sub>, As<sub>4</sub>Se<sub>3</sub>, As<sub>5</sub>Ba<sub>2</sub>In<sub>5</sub>, <b>AuLa</b>, BaLa<sub>2</sub>O<sub>4</sub>, BaLu<sub>2</sub>O<sub>4</sub>, BaLu<sub>2</sub>S<sub>4</sub>, BaLu<sub>2</sub>Se<sub>4</sub>, BaLu<sub>2</sub>Te<sub>4</sub>, BaO<sub>3</sub>Th, BaS<sub>3</sub>U, BaSe<sub>5</sub>U<sub>2</sub>, <b>Ba<sub>2</sub>Pb</b>, Ba<sub>2</sub>S<sub>3</sub>Zn, Ba<sub>2</sub>S<sub>4</sub>Ti, Ba<sub>2</sub>Sb<sub>6</sub>Sn<sub>3</sub>, <b>Ba<sub>2</sub>Si</b>, Ba<sub>2</sub>Si<sub>4</sub>, Ba<sub>2</sub>Sn, Ba<sub>2</sub>SnTe<sub>5</sub>, Ba<sub>3</sub>BrGaS<sub>4</sub>, Ba<sub>3</sub>ClGaS<sub>4</sub>, Ba<sub>3</sub>ClGaSe<sub>4</sub>, Ba<sub>3</sub>GaSb<sub>3</sub>, Ba<sub>3</sub>GeO, Ba<sub>3</sub>GeS<sub>5</sub>, Ba<sub>3</sub>S<sub>5</sub>Si, Ba<sub>5</sub>P<sub>4</sub>, Ba<sub>5</sub>Sb<sub>4</sub>, <b>Ba<sub>7</sub>Ge<sub>6</sub></b>, BeCl<sub>4</sub>Cs<sub>2</sub>, BeCs<sub>2</sub>F<sub>4</sub>, BeF<sub>4</sub>K<sub>2</sub>, BeF<sub>4</sub>Na<sub>2</sub>, BeF<sub>4</sub>Tl<sub>2</sub>, BeO<sub>4</sub>Y<sub>2</sub>, BiBrCdSe<sub>2</sub>, BiBrS, BiBrSe, BiBr<sub>6</sub>Rb<sub>3</sub>, BiCaLi, BiCdClS<sub>2</sub>, BiClS, BiClSe, BiCl<sub>3</sub>O<sub>3</sub>Sr<sub>3</sub>, BiF<sub>3</sub>, BiF<sub>5</sub>K<sub>2</sub>, BiIn<sub>2</sub>Se<sub>4</sub>, BiIS, BiISe, <b>BiI<sub>3</sub></b>, BiInO<sub>3</sub>, BiLiSr, BiMg<sub>2</sub>O<sub>6</sub>P, BiO<sub>6</sub>PPb<sub>2</sub>, Bi<sub>2</sub>CdCs<sub>2</sub>S<sub>5</sub>, Bi<sub>2</sub>Cs<sub>2</sub>S<sub>5</sub>Zn, Bi<sub>2</sub>Cs<sub>2</sub>Se<sub>5</sub>Zn, Bi<sub>2</sub>Ga<sub>4</sub>O<sub>9</sub>, Bi<sub>2</sub>GeO<sub>5</sub>, Bi<sub>2</sub>O<sub>5</sub>Sr<sub>2</sub>, Bi<sub>2</sub>PbS<sub>4</sub>, Bi<sub>2</sub>Pb<sub>2</sub>S<sub>5</sub>, Bi<sub>2</sub>S<sub>3</sub>, Bi<sub>2</sub>S<sub>5</sub>Tl<sub>4</sub>, Bi<sub>2</sub>Se<sub>3</sub>, Bi<sub>3</sub>CsS<sub>5</sub>, Bi<sub>3</sub>CsSe<sub>5</sub>, Bi<sub>3</sub>In<sub>2</sub>Se<sub>7</sub>, <b>Bi<sub>3</sub>Sc<sub>5</sub></b>, <b>Bi<sub>3</sub>Y<sub>5</sub></b>, Bi<sub>6</sub>Cl<sub>3</sub>FO<sub>7</sub>, BrClPb, BrCsI<sub>2</sub>, BrIPb, BrKO<sub>4</sub>, BrLa<sub>2</sub>S<sub>5</sub>Sb, BrLa<sub>3</sub>Te<sub>4</sub>, BrO<sub>4</sub>Tl, BrSSb, BrTe<sub>2</sub>, Br<sub>2</sub>O<sub>2</sub>Pb<sub>3</sub>, Br<sub>2</sub>Pb, Br<sub>2</sub>S<sub>7</sub>Te, Br<sub>2</sub>Sn, Br<sub>2</sub>Sr, Br<sub>3</sub>CdIn, Br<sub>3</sub>CdRb, Br<sub>3</sub>CdTi, Br<sub>3</sub>Cs, Br<sub>3</sub>CsPb, Br<sub>3</sub>InMg, Br<sub>3</sub>P, Br<sub>3</sub>Sb, Br<sub>4</sub>CdCs<sub>2</sub>, Br<sub>4</sub>CsGa, Br<sub>4</sub>Cs<sub>2</sub>Zn, Br<sub>4</sub>GaNa, Br<sub>4</sub>Rb<sub>2</sub>Zn, Br<sub>5</sub>Cs<sub>3</sub>Hg, Br<sub>5</sub>Nb, Br<sub>5</sub>Rb<sub>3</sub>Zn, Br<sub>7</sub>P, C, CLiN, CO<sub>3</sub>Pb, C<sub>2</sub>Ba, C<sub>3</sub>O<sub>2</sub>, <b>Ca</b>, <b>CaCdPd</b>, <b>CaCdPt</b>, CaCd<sub>2</sub>Pd, CaCl<sub>2</sub>, CaF<sub>2</sub>, CaF<sub>3</sub>K, CaGa<sub>2</sub>O<sub>4</sub>, CaGeMg, CaGeMgO<sub>4</sub>, CaGeO<sub>3</sub>, <b>CaGePt</b>, CaGeSr, CaHfS<sub>3</sub>, CaLiN, CaLiSb, CaMgO<sub>4</sub>Si, <b>CaMgPd</b>, CaMgSi, CaMgSn, CaMoO<sub>3</sub>, CaO<sub>3</sub>Pb, CaO<sub>3</sub>Si, CaO<sub>3</sub>Sn, CaO<sub>3</sub>Ti, CaO<sub>3</sub>Zr, CaO<sub>4</sub>S, CaO<sub>4</sub>Sc<sub>2</sub>, CaO<sub>6</sub>Ta<sub>2</sub>, <b>CaPbPd</b>, <b>CaPbPt</b>, CaPbSr, <b>CaPdSn</b>, <b>CaPtSi</b>, <b>CaPtSn</b>, CaS<sub>3</sub>Zr, CaS<sub>4</sub>Sc<sub>2</sub>, CaS<sub>4</sub>Y<sub>2</sub>, <b>CaSe<sub>5</sub>U<sub>2</sub></b>, CaSiSr, CaSnSr, <b>CaTe</b>, Ca<sub>2</sub>CdSb<sub>2</sub>, Ca<sub>2</sub>Cd<sub>2</sub>KSb<sub>3</sub>, Ca<sub>2</sub>Ge, Ca<sub>2</sub>GeS<sub>4</sub>, Ca<sub>2</sub>Ge<sub>2</sub>InLi, <b>Ca<sub>2</sub>Hg</b>, Ca<sub>2</sub>O<sub>4</sub>Si, Ca<sub>2</sub>Pb, <b>Ca<sub>2</sub>Pt<sub>3</sub>Sn<sub>5</sub></b>, Ca<sub>2</sub>S<sub>4</sub>Si, Ca<sub>2</sub>S<sub>4</sub>Sn, Ca<sub>2</sub>Se<sub>4</sub>Si, Ca<sub>2</sub>Si, <b>Ca<sub>3</sub>GeO</b>, <b>Ca<sub>3</sub>Hg</b>, Ca<sub>3</sub>InP<sub>3</sub>, Ca<sub>3</sub>OSi, <b>Ca<sub>3</sub>Pd</b>, Ca<sub>6</sub>Cd<sub>11</sub>Pt, <b>Ca<sub>7</sub>Ge<sub>6</sub></b>, CdClS<sub>2</sub>Sb, CdCl<sub>3</sub>K, CdCl<sub>3</sub>Rb, CdCl<sub>3</sub>Tl, CdCs<sub>2</sub>I<sub>4</sub>, CdCs<sub>3</sub>I<sub>5</sub>, CdF<sub>2</sub>, CdF<sub>3</sub>K, CdGeO<sub>3</sub>, <b>CdGeSr</b>, CdI<sub>3</sub>Tl, CdLi<sub>2</sub>O<sub>4</sub>Si, <b>CdNaSb</b>, CdO<sub>3</sub>Se, CdO<sub>3</sub>Sn, CdO<sub>3</sub>Ti, CdP<sub>14</sub>Pb, CdP<sub>14</sub>Sn, <b>CdPtSr</b>, CdSbTl, Cd<sub>2</sub>GeO<sub>4</sub>, Cd<sub>2</sub>KSb<sub>3</sub>Sr<sub>2</sub>, Cd<sub>3</sub>K<sub>2</sub>S<sub>4</sub>, Cd<sub>3</sub>K<sub>2</sub>Se<sub>4</sub>, Cd<sub>3</sub>K<sub>2</sub>Te<sub>4</sub>, Cd<sub>3</sub>Na<sub>4</sub>Se<sub>5</sub>, Cd<sub>3</sub>Rb<sub>2</sub>S<sub>4</sub>, Cd<sub>3</sub>Rb<sub>2</sub>Se<sub>4</sub>, ClCsO<sub>4</sub>, ClCs<sub>3</sub>O, ClFSn, ClF<sub>3</sub>, ClIPb, ClKO<sub>3</sub>, ClKO<sub>4</sub>, ClK<sub>3</sub>O, ClLaNb<sub>2</sub>O<sub>6</sub>, ClLaSe, ClLaTe, ClLiO<sub>4</sub>, ClLuO<sub>3</sub>Se, ClN<sub>5</sub>S<sub>4</sub>, ClNaO<sub>4</sub>, ClNb<sub>3</sub>O<sub>7</sub>, ClO<sub>3</sub>SbTe, ClO<sub>4</sub>Rb, Cl<sub>2</sub>Hg, Cl<sub>2</sub>O<sub>2</sub>Pb<sub>3</sub>, Cl<sub>2</sub>O<sub>2</sub>U, Cl<sub>2</sub>O<sub>3</sub>Sb<sub>2</sub>Zn, Cl<sub>2</sub>Pb, Cl<sub>2</sub>S<sub>5</sub>Sb<sub>4</sub>, Cl<sub>2</sub>S<sub>7</sub>Te, Cl<sub>2</sub>Sn, Cl<sub>3</sub>GaLi, Cl<sub>3</sub>HgNa, Cl<sub>3</sub>HgTl, Cl<sub>3</sub>KMg, Cl<sub>3</sub>Na, Cl<sub>3</sub>P, Cl<sub>3</sub>Sb, Cl<sub>4</sub>CsGa, Cl<sub>4</sub>Cs<sub>2</sub>Hg, Cl<sub>4</sub>Cs<sub>2</sub>Mg, Cl<sub>4</sub>Cs<sub>2</sub>Zn, Cl<sub>4</sub>GaRb, Cl<sub>4</sub>GaTl, Cl<sub>4</sub>HgK<sub>2</sub>, Cl<sub>4</sub>K<sub>2</sub>Zn, Cl<sub>4</sub>Li<sub>2</sub>Zn, Cl<sub>4</sub>Rb<sub>2</sub>Zn, Cl<sub>5</sub>CsPd<sub>2</sub>, Cl<sub>5</sub>Cs<sub>2</sub>Tl, Cl<sub>5</sub>Cs<sub>3</sub>Hg, Cl<sub>5</sub>K<sub>2</sub>La, Cl<sub>5</sub>Mo, Cl<sub>5</sub>PbRb<sub>3</sub>, Cl<sub>7</sub>InY<sub>2</sub>, CsF<sub>4</sub>IO, CsF<sub>5</sub>Te, CsI, CsIO<sub>4</sub>, CsI<sub>3</sub>, CsI<sub>3</sub>Pb, CsI<sub>3</sub>Sn, CsIn<sub>3</sub>O<sub>5</sub>, CsO<sub>6</sub>ScSe<sub>2</sub>, CsPPbS<sub>4</sub>, CsPPbSe<sub>4</sub>, Cs<sub>2</sub>GaSb<sub>2</sub>, Cs<sub>2</sub>GeTe<sub>4</sub>, Cs<sub>2</sub>MoS<sub>4</sub>, Cs<sub>2</sub>MoSe<sub>4</sub>, Cs<sub>2</sub>O<sub>3</sub>Sn<sub>2</sub>, Cs<sub>2</sub>O<sub>4</sub>Se, Cs<sub>2</sub>O<sub>4</sub>Te, Cs<sub>2</sub>O<sub>4</sub>W, Cs<sub>2</sub>S, Cs<sub>2</sub>S<sub>4</sub>W, Cs<sub>2</sub>Se, Cs<sub>2</sub>Se<sub>4</sub>W, Cs<sub>2</sub>SnTe<sub>4</sub>, Cs<sub>2</sub>Te, Cs<sub>3</sub>I<sub>5</sub>Zn, Cs<sub>3</sub>NbSe<sub>4</sub>, Cs<sub>3</sub>O<sub>4</sub>Sb, Cs<sub>3</sub>PSe<sub>4</sub>, Cs<sub>3</sub>S<sub>4</sub>Sb, Cs<sub>3</sub>S<sub>4</sub>Ta, Cs<sub>3</sub>SbSe<sub>4</sub>, Cs<sub>3</sub>Se<sub>4</sub>Ta, Cs<sub>4</sub>Sb<sub>2</sub>, Cs<sub>5</sub>GeP<sub>3</sub>, Cs<sub>5</sub>P<sub>3</sub>Si, F<sub>10</sub>GeXe, F<sub>11</sub>PtXe, F<sub>11</sub>SbXe, FLa<sub>3</sub>N<sub>4</sub>Si, FLiO<sub>4</sub>SZn, FMO<sub>3</sub>Na<sub>3</sub>O<sub>4</sub>, FNa<sub>3</sub>O<sub>4</sub>W, FOSb, FO<sub>3</sub>STl, FO<sub>4</sub>SY, <b>FSeY</b>, F<sub>2</sub>Ge, F<sub>2</sub>Hg, F<sub>2</sub>Mg, F<sub>2</sub>Mg<sub>3</sub>O<sub>4</sub>Si, F<sub>2</sub>O, F<sub>2</sub>Pb, F<sub>2</sub>S<sub>3</sub>SnSr<sub>2</sub>, F<sub>2</sub>Se<sub>3</sub>SnSr<sub>2</sub>, F<sub>2</sub>Sr, F<sub>3</sub>I,</p> |
|----|------------------------------------------------------------------------------------------------------------------------------------------------------------------------------------------------------------------------------------------------------------------------------------------------------------------------------------------------------------------------------------------------------------------------------------------------------------------------------------------------------------------------------------------------------------------------------------------------------------------------------------------------------------------------------------------------------------------------------------------------------------------------------------------------------------------------------------------------------------------------------------------------------------------------------------------------------------------------------------------------------------------------------------------------------------------------------------------------------------------------------------------------------------------------------------------------------------------------------------------------------------------------------------------------------------------------------------------------------------------------------------------------------------------------------------------------------------------------------------------------------------------------------------------------------------------------------------------------------------------------------------------------------------------------------------------------------------------------------------------------------------------------------------------------------------------------------------------------------------------------------------------------------------------------------------------------------------------------------------------------------------------------------------------------------------------------------------------------------------------------------------------------------------------------------------------------------------------------------------------------------------------------------------------------------------------------------------------------------------------------------------------------------------------------------------------------------------------------------------------------------------------------------------------------------------------------------------------------------------------------------------------------------------------------------------------------------------------------------------------------------------------------------------------------------------------------------------------------------------------------------------------------------------------------------------------------------------------------------------------------------------------------------------------------------------------------------------------------------------------------------------------------------------------------------------------------------------------------------------------------------------------------------------------------------------------------------------------------------------------------------------------------------------------------------------------------------------------------------------------------------------------------------------------------------------------------------------------------------------------------------------------------------------------------------------------------------------------------------------------------------------------------------------------------------------------------------------------------------------------------------------------------------------------------------------------------------------------------------------------------------------------------------------------------------------------------------------------------------------------------------------------------------------------------------------------------------------------------------------------------------------------------------------------------------------------------------------------------------------------------------------------------------------------------------------------------------------------------------------------------------------------------------------------------------------------------------------------------------------------------------------------------------------------------------------------------------------------------------------------------------------------------------------------------------------------------------------------------------------------------------------------------------------------------------------------------------------------------------------------------------------------------------------------------------------------------------------------------------------------------------------------------------------------------------------------------------------------------------------------------------------------------------------------------------------------------------------------------------------------------------------------------------------------------------------------------------------------------------------------------------------------------------------------------------------------------------------------------------------------------------------------------------------------------------------------------------------------------------------------------------------------------------------------------------------------------------------------------------------------------------------------------------------------------------------------------------------------------------------------------------------------------------------------------------------------------------------------------------------------------------------------------------------------------------------------------------------------------------------------------------------------------------------------------------------------------------------------------------------------------------------------------------------------------------------------------------------------------------------------------------------------------------------------------------------------------------------------------------------------------------------------------------------------------------------------------------------------------------------------------------------------------------------------------------------------------------------------------------------------------------------------------------------------------------------------------------------------------------------------------------------------------------------------------------------------------------------------------------------------------------------------------------------------------------------------------------------------------------------------------------------------------------------------------------------------------------------------------------------------------------------------------------------------------------------------------------------------------------------------------------------------------------------------------------------------------------------------------------------------------------------------------------------------------------------------------------------------------------------------------------------------------------------------------------------------------------------------------------------------------------------------------------------------------------------------------------------------------------------------------------------------------------------------------------------------------------------------------------------------------------------------------------------------------------------------------------------------------------------------------------------------------------------------------------------------------------------------------------------------------------------------------------------------------------------------------------------------------------------------------------------------------------------------------------------------------------------------------------------------------------------------------------------------------------------------------------------------------------------------------------------------------------------------------------------------------------------------------------------------------------------------------------------------------------------------------------|

Part 8 of all the predicted materials with band crossings from **Cases 1 or 2**:

|    |                                                                                                                                                                                                                                                                                                                                                                                                                                                                                                                                                                                                                                                                                                                                                                                                                                                                                                                                                                                                                                                                                                                                                                                                                                                                                                                                                                                                                                                                                                                                                                                                                                                                                                                                                                                                                                                                                                                                                                                                                                                                                                                                                                                                                                                                                                                                                                                                                                                                                                                                                                                                                                                                                                                                                                                                                                                                                                                                                                                                                                                                                                                                                                                                                                                                                                                                                                                                                                                                                                                                                                                                                                                                                                                                                                                                                                                                                                                                                                                                                                                                                                                                                                                                                                                                                                                                                                                                                                                                                                                                                                                                                                                                                                                                                                                                                                                                                                                                                                                                                                                                                                                                                                                                                                                                                                                                                                                                                                                                                                                                                                                                                                                                                                                                                                                                                                                                                                                                                                                                                                                                                                                                                                                                                                                                                                                                                                                                                                                                                                                                                                                                                                                                                                                                                                                                                                                                                                                                                                                                                                                                                                                                                                                                                                                                                                                                                                                                                                                                                                                                                                                                                                                                                                                                                                            |
|----|----------------------------------------------------------------------------------------------------------------------------------------------------------------------------------------------------------------------------------------------------------------------------------------------------------------------------------------------------------------------------------------------------------------------------------------------------------------------------------------------------------------------------------------------------------------------------------------------------------------------------------------------------------------------------------------------------------------------------------------------------------------------------------------------------------------------------------------------------------------------------------------------------------------------------------------------------------------------------------------------------------------------------------------------------------------------------------------------------------------------------------------------------------------------------------------------------------------------------------------------------------------------------------------------------------------------------------------------------------------------------------------------------------------------------------------------------------------------------------------------------------------------------------------------------------------------------------------------------------------------------------------------------------------------------------------------------------------------------------------------------------------------------------------------------------------------------------------------------------------------------------------------------------------------------------------------------------------------------------------------------------------------------------------------------------------------------------------------------------------------------------------------------------------------------------------------------------------------------------------------------------------------------------------------------------------------------------------------------------------------------------------------------------------------------------------------------------------------------------------------------------------------------------------------------------------------------------------------------------------------------------------------------------------------------------------------------------------------------------------------------------------------------------------------------------------------------------------------------------------------------------------------------------------------------------------------------------------------------------------------------------------------------------------------------------------------------------------------------------------------------------------------------------------------------------------------------------------------------------------------------------------------------------------------------------------------------------------------------------------------------------------------------------------------------------------------------------------------------------------------------------------------------------------------------------------------------------------------------------------------------------------------------------------------------------------------------------------------------------------------------------------------------------------------------------------------------------------------------------------------------------------------------------------------------------------------------------------------------------------------------------------------------------------------------------------------------------------------------------------------------------------------------------------------------------------------------------------------------------------------------------------------------------------------------------------------------------------------------------------------------------------------------------------------------------------------------------------------------------------------------------------------------------------------------------------------------------------------------------------------------------------------------------------------------------------------------------------------------------------------------------------------------------------------------------------------------------------------------------------------------------------------------------------------------------------------------------------------------------------------------------------------------------------------------------------------------------------------------------------------------------------------------------------------------------------------------------------------------------------------------------------------------------------------------------------------------------------------------------------------------------------------------------------------------------------------------------------------------------------------------------------------------------------------------------------------------------------------------------------------------------------------------------------------------------------------------------------------------------------------------------------------------------------------------------------------------------------------------------------------------------------------------------------------------------------------------------------------------------------------------------------------------------------------------------------------------------------------------------------------------------------------------------------------------------------------------------------------------------------------------------------------------------------------------------------------------------------------------------------------------------------------------------------------------------------------------------------------------------------------------------------------------------------------------------------------------------------------------------------------------------------------------------------------------------------------------------------------------------------------------------------------------------------------------------------------------------------------------------------------------------------------------------------------------------------------------------------------------------------------------------------------------------------------------------------------------------------------------------------------------------------------------------------------------------------------------------------------------------------------------------------------------------------------------------------------------------------------------------------------------------------------------------------------------------------------------------------------------------------------------------------------------------------------------------------------------------------------------------------------------------------------------------------------------------------------------------------------------------------------------------------------------|
| 62 | <p> <math>F_3MgNa</math>, <math>F_3NaZn</math>, <math>F_3PbRb</math>, <math>F_3Tl</math>, <math>F_3Y</math>, <math>F_4GaK</math>, <math>F_4KTI</math>, <math>F_4LaRb</math>, <math>F_5KPD_2</math>, <math>F_5Lu_3O_2</math>,<br/> <math>F_5NaTe</math>, <math>F_5RbS</math>, <math>F_5RbTe</math>, <math>F_5TeTl</math>, <math>F_6KNaSi</math>, <math>F_6Mo</math>, <math>F_6Pt</math>, <math>F_6Te</math>, <math>F_6W</math>, <math>F_7InMgNa_2</math>, <math>F_7K_2Ta</math>,<br/> <math>F_7LiSb_2</math>, <math>F_7NbOSe</math>, <math>F_8Li_4Zr</math>, <math>F_8Pb_2Zr</math>, <math>F_9KU_2</math>, <math>GaKO_6Se_2</math>, <math>GaKSb_4</math>, <math>GaK_2Sb_2</math>, <math>GaLaO_3</math>, <b>GaLaPd</b>,<br/> <math>GaLaPd_2</math>,<br/> <b>GaLaPt</b>, <math>GaLa_3OS_5</math>, <b>GaLuPd</b>, <b>GaLuPt</b>, <math>GaNao_6Se_2</math>, <b>GaPdSc</b>, <b>GaPdY</b>, <math>GaPd_2Y</math>, <b>GaPtSc</b>, <b>GaPtY</b>,<br/> <math>GaRb_2Sb_2</math>,<br/> <math>GaTh</math>, <math>Ga_2K_2Na_4O_6</math>, <math>Ga_2MoO_{10}Te_2</math>, <b>Ga_2Pd_5</b>, <math>Ga_3ITe_3</math>, <math>Ga_3Na_2Sb_3</math>, <b>Ga_5Lu_3</b>, <b>Ga_5Y_3</b>, <math>GeHfMo</math>, <b>GeHfPt</b>,<br/> <math>GeI_3Tl</math>,<br/> <math>GeInLiO_4</math>, <math>GeLiNbO_5</math>, <math>GeLiO_4Sc</math>, <math>GeLi_4S_4</math>, <math>GeLuNaO_4</math>, <math>GeMgSr</math>, <math>GeMg_2O_4</math>, <math>GeMg_2S_4</math>, <math>GeMg_2Se_4</math>,<br/> <b>GeMoZr</b>, <math>GeNaO_4Y</math>,<br/> <math>GeNa_4Se_4</math>, <math>GeOSr_3</math>, <math>GeP_3Rb_5</math>, <b>GePd</b>, <b>GePdTi</b>, <math>GePdU</math>, <b>GePdZr</b>, <b>GePt</b>, <math>GePtU</math>, <b>GePtZr</b>, <math>GeS</math>,<br/> <math>GeS_3Ti</math>, <math>GeSe</math>, <math>GeSr_2</math>, <math>GeTe</math>, <math>GeTe_3Tl_2</math>, <b>GeZr</b>, <b>Ge_2InLiSr_2</b>, <b>Ge_2Li_3Na</b>, <b>Ge_2Mo</b>, <b>Ge_2Pt_3</b>, <math>Ge_2Sr</math>,<br/> <b>Ge_2W</b>, <math>Ge_3N_4</math>, <b>Ge_3Pt_2</b>, <b>Ge_4Hf_3Nb_2</b>, <math>Ge_4Hf_5</math>, <math>Ge_4Mo_3Sc_2</math>, <math>Ge_4Ti_5</math>, <b>Ge_6Sr_7</b>, <math>HfLa_2S_5</math>, <math>HfLa_2Se_5</math>, <math>HfMoSi</math>,<br/> <b>HfNbP</b>, <math>HfO_2</math>, <math>HfO_3Sr</math>, <b>HfP_2</b>, <math>HfPbS_3</math>, <b>HfPdSi</b>, <b>HfPtSi</b>, <math>HfS_3Sn</math>, <math>HfS_3Sr</math>, <math>HfS_5Y_2</math>, <b>HfSi</b>,<br/> <b>HfSiW</b>, <b>Hf_3P_2</b>, <b>HgMg_2</b>, <math>HgO</math>, <math>HgO_3Se</math>, <math>HgP_{14}Sn</math>, <b>HgSr_3</b>, <math>Hg_3Sr</math>, <math>Hg_8Sr</math>, <math>IIn_3Te_3</math>, <math>INZn_2</math>,<br/> <math>INaO_3</math>, <math>INbO_2</math>, <math>ISSb</math>, <math>ISbSe</math>, <math>ITe_2</math>, <math>I_2O_2Pb_3</math>, <math>I_2P_4S_3</math>, <math>I_2P_4Se_3</math>, <math>I_2Sr</math>, <math>I_3PbRb</math>, <math>I_3Rb</math>,<br/> <math>I_3RbSn</math>, <math>I_3Tl</math>, <math>I_4Li_2Zn</math>, <math>I_5Ta</math>, <math>I_6PdRb_2</math>, <math>InKO_6Te_2</math>, <math>InLaO_3</math>, <math>InLiO_4Si</math>, <math>InP_3Sr_3</math>, <math>InS_3Sb</math>, <math>InS_4SiTl</math>,<br/> <math>In_2KNa_9O_8</math>, <math>In_2O_3</math>, <math>In_2O_4Sr</math>, <math>In_2O_5Ti</math>, <math>In_2PbS_4</math>, <b>In_4La_2Pd_3</b>, <b>In_5Y_3</b>, <math>K</math>, <math>KNO_3</math>, <math>KNaS</math>, <math>KNaSe</math>,<br/> <math>KNaTe</math>, <math>KO_6Se_2Y</math>, <math>KO_6Te_2Y</math>, <math>KPPbS_4</math>, <math>KRbS</math>, <math>K_2MoS_4</math>, <math>K_2Na_3P_3Si</math>, <math>K_2O_{10}UW_2</math>, <math>K_2O_3Pb</math>, <math>K_2O_3Sn</math>,<br/> <math>K_2O_3Zr</math>,<br/> <math>K_2O_4S</math>, <math>K_2O_4Se</math>, <math>K_2P_2PdS_6</math>, <math>K_2Se_4W</math>, <math>K_2Te_3</math>, <math>K_3LiSi_4</math>, <math>K_3Li_3O_6Te</math>, <math>K_3NO_4</math>, <math>K_3NbS_4</math>, <math>K_3NbSe_4</math>, <math>K_3PS_4</math>,<br/> <math>K_3PSe_4</math>, <math>K_3S_4Ta</math>, <math>K_4Se_2SnTe_2</math>, <math>K_4Se_4Sn</math>, <math>LaLuO_3</math>, <math>LaO_3Sc</math>, <math>LaO_3Y</math>, <math>LaO_9Ta_3</math>, <b>LaPPt</b>, <math>LaPS</math>, <math>LaRbS_4Si</math>,<br/> <math>LaS_2</math>, <b>LaSbTe</b>, <math>La_2O_2S_3Sn</math>, <math>La_2O_5Ti</math>, <math>La_2S_3</math>, <math>La_2S_5Th</math>, <b>La_2S_5U</b>, <math>La_2S_5Zr</math>, <math>La_2Se_5Th</math>, <b>La_2Se_5U</b>, <math>La_2Se_5Zr</math>,<br/> <math>La_3NS_3</math>, <math>La_3NbO_7</math>, <math>La_4N_2Te_3</math>, <math>Li_{12}Si_7</math>, <math>LiMgN</math>, <math>LiNaSe</math>, <math>LiNaTe</math>, <math>LiORb</math>, <math>LiO_4ScSi</math>, <math>LiSbSr</math>, <math>Li_2O_4U</math>,<br/> <math>Li_2O_7S_2</math>, <math>Li_2O_7Se_2</math>, <math>Li_2S</math>, <math>Li_3NaSi_6</math>, <math>Li_4S_4Sn</math>, <math>Li_4Se_4Sn</math>, <math>Lu_2PbS_4</math>, <math>Lu_2S_4Sr</math>, <math>Lu_2S_4Zn</math>, <math>Lu_2Se_4Sr</math>, <b>Lu_5Sb_3</b>,<br/> <math>MgO_3Se</math>, <math>MgO_3Si</math>, <math>MgO_4S</math>, <math>MgO_4Se</math>, <math>MgO_6Pb_2W</math>, <math>MgPbSr</math>, <math>MgPd_2</math>, <math>MgSiSr</math>, <b>MgSi_2Sr</b>, <math>MgSnSr</math>, <math>Mg_2O_4Si</math>,<br/> <b>Mg_2Pb</b>, <math>Mg_2S_4Si</math>, <math>Mg_2S_4Sn</math>, <math>Mg_2Se_4Si</math>, <math>Mg_2Se_4Sn</math>, <math>Mg_2Si</math>, <math>MoO_3</math>, <math>MoO_4Rb_2</math>, <b>MoPt_3Si_4</b>, <math>MoRb_2S_4</math>,<br/> <math>MoRb_2Se_4</math>,<br/> <math>MoSiZr</math>, <math>Mo_3Sc_2Si_4</math>, <b>Mo_4P_3</b>, <b>NNa_3</b>, <math>N_3TaTh</math>, <math>N_4Si_3</math>, <math>N_4Zr_3</math>, <b>N_5Ta_3</b>, <math>Na</math>, <math>NaNbO_3</math>, <math>NaO_3Sb</math>,<br/> <math>NaO_3Ta</math>, <math>NaO_6ScSe_2</math>, <math>NaP_5</math>, <math>Na_2S</math>, <math>Na_2S_5</math>, <math>Na_3O_2Tl</math>, <math>Na_4Se_4Si</math>, <b>NbPZr</b>, <math>NbRb_3S_4</math>, <b>Nb_5P_3</b>, <math>O_{14}Rb_3Ta_5</math>,<br/> <math>OSiSr_3</math>, <math>O_2Pb</math>, <math>O_2Sn</math>, <math>O_2SrZn</math>, <math>O_2Te</math>, <math>O_2Th</math>, <math>O_2Ti</math>, <math>O_2W</math>, <math>O_2Zr</math>, <math>O_3PbRb_2</math>, <math>O_3PbS</math>,<br/> <math>O_3PbSr</math>, <math>O_3ScY</math>, <math>O_3SeSr</math>, <math>O_3SeZn</math>, <math>O_3SnSr</math>, <math>O_3SnTl_2</math>, <math>O_3SrZr</math>, <math>O_3Ti_2</math>, <math>O_3W</math>, <math>O_3Y_2</math>, <math>O_4PbS</math>,<br/> <math>O_4Rb_2S</math>, <math>O_4Rb_2Se</math>, <math>O_4SSn</math>, <math>O_4SSr</math>, <math>O_4STl_2</math>, <math>O_4SZn</math>, <math>O_4SeTl_2</math>, <math>O_4SiSr_2</math>, <math>O_4SiZn_2</math>, <math>O_4SrTl_2</math>, <math>O_4SrY_2</math>,<br/> <math>O_5P_2</math>, <math>O_5STi</math>, <math>O_5TiY_2</math>, <math>O_6RbSe_2Y</math>, <math>O_6RbTe_2Y</math>, <math>O_7Si_2Y_2</math>, <math>P_{14}PbZn</math>, <math>PPbRbS_4</math>, <math>PPbS_4Tl</math>, <b>PPtSc</b>, <math>PRb_3S_4</math>,<br/> <math>PSY</math>, <math>PS_4SrTl</math>, <math>PS_4Tl_3</math>, <b>PSc_3</b>, <math>PSe_4Tl_3</math>, <math>P_2Th</math>, <b>P_2Ti</b>, <b>P_2Zr</b>, <math>P_3Re</math>, <math>P_3Ta_5</math>, <math>P_4S_3</math>,<br/> <math>PbS</math>, <math>PbS_3Sn</math>, <math>PbS_3Zr</math>, <math>PbS_4Sc_2</math>, <b>PbS_5U_2</b>, <math>PbSc_2Se_4</math>, <math>PbSe</math>, <b>PbSe_5U_2</b>, <b>PbSr_2</b>, <math>PbTe</math>, <math>Pb_4Se_4</math>,<br/> <b>Pb_4Sr_5</b>, <b>PdSc_6Te_2</b>, <math>PdSe_3U</math>, <math>PdSi</math>, <math>PdSiTi</math>, <math>PdSiU</math>, <math>PdSiZr</math>, <math>PdSn</math>, <math>PdTe_2Y_6</math>, <math>PdTh</math>, <math>Pd_2Sn</math>,<br/> <math>Pd_2SnU</math>, </p> |
|----|----------------------------------------------------------------------------------------------------------------------------------------------------------------------------------------------------------------------------------------------------------------------------------------------------------------------------------------------------------------------------------------------------------------------------------------------------------------------------------------------------------------------------------------------------------------------------------------------------------------------------------------------------------------------------------------------------------------------------------------------------------------------------------------------------------------------------------------------------------------------------------------------------------------------------------------------------------------------------------------------------------------------------------------------------------------------------------------------------------------------------------------------------------------------------------------------------------------------------------------------------------------------------------------------------------------------------------------------------------------------------------------------------------------------------------------------------------------------------------------------------------------------------------------------------------------------------------------------------------------------------------------------------------------------------------------------------------------------------------------------------------------------------------------------------------------------------------------------------------------------------------------------------------------------------------------------------------------------------------------------------------------------------------------------------------------------------------------------------------------------------------------------------------------------------------------------------------------------------------------------------------------------------------------------------------------------------------------------------------------------------------------------------------------------------------------------------------------------------------------------------------------------------------------------------------------------------------------------------------------------------------------------------------------------------------------------------------------------------------------------------------------------------------------------------------------------------------------------------------------------------------------------------------------------------------------------------------------------------------------------------------------------------------------------------------------------------------------------------------------------------------------------------------------------------------------------------------------------------------------------------------------------------------------------------------------------------------------------------------------------------------------------------------------------------------------------------------------------------------------------------------------------------------------------------------------------------------------------------------------------------------------------------------------------------------------------------------------------------------------------------------------------------------------------------------------------------------------------------------------------------------------------------------------------------------------------------------------------------------------------------------------------------------------------------------------------------------------------------------------------------------------------------------------------------------------------------------------------------------------------------------------------------------------------------------------------------------------------------------------------------------------------------------------------------------------------------------------------------------------------------------------------------------------------------------------------------------------------------------------------------------------------------------------------------------------------------------------------------------------------------------------------------------------------------------------------------------------------------------------------------------------------------------------------------------------------------------------------------------------------------------------------------------------------------------------------------------------------------------------------------------------------------------------------------------------------------------------------------------------------------------------------------------------------------------------------------------------------------------------------------------------------------------------------------------------------------------------------------------------------------------------------------------------------------------------------------------------------------------------------------------------------------------------------------------------------------------------------------------------------------------------------------------------------------------------------------------------------------------------------------------------------------------------------------------------------------------------------------------------------------------------------------------------------------------------------------------------------------------------------------------------------------------------------------------------------------------------------------------------------------------------------------------------------------------------------------------------------------------------------------------------------------------------------------------------------------------------------------------------------------------------------------------------------------------------------------------------------------------------------------------------------------------------------------------------------------------------------------------------------------------------------------------------------------------------------------------------------------------------------------------------------------------------------------------------------------------------------------------------------------------------------------------------------------------------------------------------------------------------------------------------------------------------------------------------------------------------------------------------------------------------------------------------------------------------------------------------------------------------------------------------------------------------------------------------------------------------------------------------------------------------------------------------------------------------------------------------------------------------------------------------------------------------------------------------------------------------------------------------------------------------------------|

Part 9 of all the predicted materials with band crossings from **Cases 1 or 2:**

|    |                                                                                                                                                                                                                                                                                                                                                                                                                                                                                                                                                                                                                                                                                                                                                                                                                                                                                                                                                                                                                                                                                                                                                                                                                                                                                                                                                                                                                                                                                                                                                                                                                                                                                                                                                                                                                                                                                                                                                                                                                                                                                                                                                                                                                                                                                                                                                                                                                                                                                                                                                                                                                                                                                                                                                                                                                                                                                                                                                                                                                                                                                                                                                                                                                                                                                                                                                                                                                                                                                                                                                                                                                                                                                                                                                                                                                                                                                                                                                                                                                                                                                                                                                                                                                                                                                                                                                                                                                                                                                                                                                                                                                                                                                                                                                                                                                                                                                                                                                                                                                                                                                                                                                                                                                                                                                                                                                                                                                                                                                                                                                                                                                                                                                                                                                                                                                                                   |
|----|---------------------------------------------------------------------------------------------------------------------------------------------------------------------------------------------------------------------------------------------------------------------------------------------------------------------------------------------------------------------------------------------------------------------------------------------------------------------------------------------------------------------------------------------------------------------------------------------------------------------------------------------------------------------------------------------------------------------------------------------------------------------------------------------------------------------------------------------------------------------------------------------------------------------------------------------------------------------------------------------------------------------------------------------------------------------------------------------------------------------------------------------------------------------------------------------------------------------------------------------------------------------------------------------------------------------------------------------------------------------------------------------------------------------------------------------------------------------------------------------------------------------------------------------------------------------------------------------------------------------------------------------------------------------------------------------------------------------------------------------------------------------------------------------------------------------------------------------------------------------------------------------------------------------------------------------------------------------------------------------------------------------------------------------------------------------------------------------------------------------------------------------------------------------------------------------------------------------------------------------------------------------------------------------------------------------------------------------------------------------------------------------------------------------------------------------------------------------------------------------------------------------------------------------------------------------------------------------------------------------------------------------------------------------------------------------------------------------------------------------------------------------------------------------------------------------------------------------------------------------------------------------------------------------------------------------------------------------------------------------------------------------------------------------------------------------------------------------------------------------------------------------------------------------------------------------------------------------------------------------------------------------------------------------------------------------------------------------------------------------------------------------------------------------------------------------------------------------------------------------------------------------------------------------------------------------------------------------------------------------------------------------------------------------------------------------------------------------------------------------------------------------------------------------------------------------------------------------------------------------------------------------------------------------------------------------------------------------------------------------------------------------------------------------------------------------------------------------------------------------------------------------------------------------------------------------------------------------------------------------------------------------------------------------------------------------------------------------------------------------------------------------------------------------------------------------------------------------------------------------------------------------------------------------------------------------------------------------------------------------------------------------------------------------------------------------------------------------------------------------------------------------------------------------------------------------------------------------------------------------------------------------------------------------------------------------------------------------------------------------------------------------------------------------------------------------------------------------------------------------------------------------------------------------------------------------------------------------------------------------------------------------------------------------------------------------------------------------------------------------------------------------------------------------------------------------------------------------------------------------------------------------------------------------------------------------------------------------------------------------------------------------------------------------------------------------------------------------------------------------------------------------------------------------------------------------------------------------------|
| 62 | <p>Pd<sub>2</sub>Zn, Pd<sub>3</sub>Si, Pd<sub>3</sub>Ta<sub>2</sub>Te<sub>5</sub>, Pd<sub>9</sub>Si<sub>2</sub>, PtSc<sub>2</sub>, PtSi, PtSiTi, PtSiZr, PtSnSr, PtY<sub>2</sub>, Pt<sub>3</sub>Si, Pt<sub>3</sub>Sr<sub>7</sub>, Pt<sub>4</sub>Sr<sub>5</sub>, RbSb<sub>3</sub>Se<sub>5</sub>, Rb<sub>2</sub>S, Rb<sub>2</sub>S<sub>4</sub>W, Rb<sub>2</sub>Se<sub>4</sub>W, Rb<sub>2</sub>Te, Rb<sub>2</sub>Te<sub>3</sub>, Rb<sub>3</sub>S<sub>4</sub>Sb, Rb<sub>3</sub>S<sub>4</sub>Ta, Rb<sub>3</sub>SbSe<sub>4</sub>, SSeU, SSn, STeU, S<sub>2</sub>Th, S<sub>2</sub>Ti, S<sub>2</sub>U, S<sub>3</sub>Sb<sub>2</sub>, S<sub>3</sub>SnSr, S<sub>3</sub>SnZr, S<sub>3</sub>Sn<sub>2</sub>, S<sub>3</sub>SrZr, S<sub>3</sub>Sr<sub>2</sub>Zn, S<sub>3</sub>TaTl, S<sub>3</sub>TeTl<sub>2</sub>, S<sub>3</sub>Th<sub>2</sub>, S<sub>3</sub>U<sub>2</sub>, S<sub>3</sub>Y<sub>2</sub>, S<sub>4</sub>Sc<sub>2</sub>Sr, S<sub>4</sub>SrY<sub>2</sub>, S<sub>4</sub>Y<sub>2</sub>Zn, S<sub>5</sub>Sb<sub>2</sub>Sn<sub>2</sub>, S<sub>5</sub>TiU<sub>2</sub>, S<sub>5</sub>U<sub>3</sub>, S<sub>5</sub>Y<sub>2</sub>Zr, Sb<sub>2</sub>Se<sub>3</sub>, Sb<sub>2</sub>SrZn, Sb<sub>3</sub>Sc<sub>5</sub>, Sb<sub>4</sub>Sn<sub>3</sub>Sr, Sc<sub>2</sub>Si<sub>4</sub>W<sub>3</sub>, Sc<sub>2</sub>SrTe<sub>4</sub>, Sc<sub>2</sub>Te, SeSn, SeTeU, SeTi, SeTi<sub>2</sub>, Se<sub>2</sub>Th, Se<sub>2</sub>U, Se<sub>3</sub>SnTl<sub>2</sub>, Se<sub>3</sub>SrZr, Se<sub>3</sub>TaTl, Se<sub>3</sub>Th<sub>2</sub>, Se<sub>3</sub>U<sub>2</sub>, Se<sub>4</sub>SrY<sub>2</sub>, Se<sub>5</sub>U<sub>3</sub>, SiSr, SiSr<sub>2</sub>, SiTh, SiTi, SiU, SiZr, SnSr<sub>2</sub>, SnTe, SnTe<sub>3</sub>Tl<sub>2</sub>, Sn<sub>4</sub>Th<sub>5</sub>, SrZn, SrZn<sub>5</sub>, TeZr, TeZr<sub>2</sub>, Te<sub>3</sub>U<sub>2</sub>, Te<sub>5</sub>U, Te<sub>5</sub>U<sub>3</sub>,</p>                                                                                                                                                                                                                                                                                                                                                                                                                                                                                                                                                                                                                                                                                                                                                                                                                                                                                                                                                                                                                                                                                                                                                                                                                                                                                                                                                                                                                                                                                                                                                                                                                                                                                                                                                                                                                                                                                                                                                                                                                                                                                                                                                                                                                                                                                                                                                                                                                                                                                                                                                                                                                                                                                                                                                                                                                                                                                                                                                                                                                                                                                                                                                                                                                                                                                                                                                                                                                                                                                                                                                                                                                                                                                                                                                                                                                                                                                                                                                                     |
| 63 | <p>Ag<sub>10</sub>Br<sub>3</sub>Te<sub>4</sub>, AgAuBa<sub>4</sub>O<sub>6</sub>, AgBaLaSe<sub>3</sub>, AgBaSe<sub>3</sub>Y, AgBaTe<sub>3</sub>Y, AgBiCl<sub>2</sub>S, AgBr<sub>2</sub>Cs, AgCl, AgCl<sub>2</sub>Cs, AgCsS<sub>3</sub>U, AgCsSe<sub>3</sub>U, AgCsTe<sub>3</sub>U, AgK<sub>2</sub>P, AgNa<sub>2</sub>Sb, AgNbO<sub>3</sub>, AgRbS<sub>3</sub>U, AgRbSe<sub>3</sub>U, AgS<sub>3</sub>Ta, Ag<sub>2</sub>Si, Ag<sub>3</sub>BrS, AlB-Mo, AlBW, AlCl<sub>8</sub>Nb, AlF<sub>3</sub>, AlF<sub>4</sub>Na, AlF<sub>5</sub>Tl<sub>2</sub>, AlGeLu, AlGeSc, AlHf<sub>3</sub>N, AlLa, AlLuSi, AlN, AlNZr<sub>3</sub>, AlSc, AlSiY, AlY, Al<sub>2</sub>BaSi<sub>2</sub>, Al<sub>2</sub>GeLa<sub>2</sub>, Al<sub>2</sub>MgO<sub>4</sub>, Al<sub>2</sub>O<sub>5</sub>Ti, Al<sub>4</sub>Mg<sub>19</sub>Zn<sub>15</sub>, AsAuNa<sub>2</sub>, AsBiMg<sub>2</sub>O<sub>6</sub>, AsIn, As<sub>2</sub>BaPd, As<sub>2</sub>BaPt, As<sub>2</sub>Cs<sub>2</sub>Pd, As<sub>2</sub>K<sub>2</sub>Pd, As<sub>2</sub>K<sub>2</sub>Pt, As<sub>2</sub>PtRb<sub>2</sub>, As<sub>3</sub>Nb<sub>4</sub>, As<sub>4</sub>Cd<sub>5</sub>Rb<sub>2</sub>, As<sub>4</sub>K<sub>2</sub>Zn<sub>5</sub>, As<sub>4</sub>Rb<sub>2</sub>Zn<sub>5</sub>, As<sub>6</sub>Ba<sub>4</sub>Cd<sub>3</sub>Li<sub>2</sub>, AuBiK<sub>2</sub>, AuBiNa<sub>2</sub>, AuCa<sub>2</sub>N, AuClTe<sub>2</sub>, AuCsS, AuCsSe, AuCsSe<sub>3</sub>U, AuCsTe<sub>3</sub>U, AuIn<sub>2</sub>Na, AuKS, AuKSe, AuK<sub>2</sub>P, AuK<sub>2</sub>Sb, AuLa, AuNSr<sub>2</sub>, AuNaO<sub>2</sub>, AuNa<sub>2</sub>Sb, AuO<sub>2</sub>Rb, AuRbS, AuRbSe, AuRbSe, AuRbSe<sub>3</sub>U, AuRbTe<sub>3</sub>U, AuY, Au<sub>2</sub>P<sub>2</sub>Pb, Au<sub>3</sub>Mg, BF<sub>4</sub>Na, BNU, BNB, BO<sub>3</sub>Y, BTa, B<sub>2</sub>BaGa<sub>2</sub>O<sub>7</sub>, B<sub>2</sub>Li<sub>2</sub>S<sub>5</sub>, B<sub>4</sub>O<sub>7</sub>Zn, B<sub>7</sub>WY<sub>3</sub>, BaBiClO<sub>2</sub>, BaBiIO<sub>2</sub>, BaCd<sub>2</sub>Pt, BaClO<sub>2</sub>Sb, BaF<sub>4</sub>Mg, BaGe, BaIn, BaIn<sub>2</sub>Pt, BaLa<sub>2</sub>O<sub>10</sub>Ti<sub>3</sub>, BaOSZn, BaO<sub>6</sub>Te<sub>2</sub>, BaO<sub>8</sub>Si<sub>2</sub>U, BaPb, BaPdS<sub>2</sub>, BaPdSb<sub>2</sub>, BaSi, BaSi<sub>6</sub>, BaSn, BaZn<sub>5</sub>, Ba<sub>3</sub>Cl<sub>2</sub>O<sub>5</sub>W, Ba<sub>3</sub>Ge<sub>5</sub>, Ba<sub>3</sub>Pb<sub>5</sub>, Ba<sub>3</sub>Sn<sub>5</sub>, Ba<sub>4</sub>Cd<sub>3</sub>Li<sub>2</sub>P<sub>6</sub>, Ba<sub>5</sub>Cd<sub>2</sub>FSb<sub>5</sub>, BeHf, BePd<sub>3</sub>, BiBrO<sub>2</sub>Sr, BiClO<sub>2</sub>Pb, BiClO<sub>2</sub>Pb, BiClO<sub>2</sub>Sr, BiIO<sub>2</sub>Sr, BiO<sub>4</sub>Re, Bi<sub>2</sub>Ca, Bi<sub>2</sub>Cs<sub>2</sub>Pd, Bi<sub>2</sub>Cs<sub>2</sub>Pt, BrIn, BrLaO<sub>7</sub>Pb<sub>6</sub>, BrO<sub>4</sub>Y<sub>3</sub>, BrTl, Br<sub>2</sub>LiRb, Br<sub>2</sub>O<sub>11</sub>Te<sub>6</sub>, Br<sub>3</sub>CaIn, Br<sub>6</sub>Mo<sub>6</sub>S<sub>3</sub>, CAgNO, CB<sub>3</sub>Nb<sub>3</sub>, C<sub>2</sub>BF<sub>2</sub>LiO<sub>4</sub>, C<sub>3</sub>BLu<sub>3</sub>, C<sub>56</sub>Cl<sub>10</sub>, C<sub>70</sub>, CaGe, CaIn<sub>2</sub>Pd, CaIn<sub>2</sub>Pt, CaIn<sub>4</sub>Pd, CaO<sub>3</sub>Pt, CaO<sub>4</sub>S, CaO<sub>4</sub>Ti<sub>2</sub>, CaO<sub>4</sub>Ti<sub>2</sub>, CaO<sub>4</sub>Tl<sub>2</sub>, CaPdSn<sub>2</sub>, CaSi, CaSn, CaZn, Ca<sub>2</sub>InN, Ca<sub>2</sub>Sn<sub>6</sub>Zn<sub>3</sub>, Ca<sub>3</sub>Zn, CdCsLaTe<sub>3</sub>, CdCsLuTe<sub>3</sub>, CdCsSe<sub>3</sub>Y, CdF<sub>7</sub>RbZr, CdF<sub>7</sub>TlZr, CdO<sub>4</sub>S, CdTe, Cd<sub>2</sub>FSb<sub>5</sub>Sr<sub>5</sub>, Cd<sub>2</sub>PdSr, Cl<sub>12</sub>Rb<sub>3</sub>Re<sub>3</sub>, ClCsO<sub>2</sub>, ClIn, ClKO<sub>2</sub>, ClNaO<sub>4</sub>, ClO<sub>2</sub>PbSb, ClO<sub>2</sub>Rb, ClTl, Cl<sub>2</sub>LiRb, Cl<sub>2</sub>MoO<sub>5</sub>Pb<sub>3</sub>, Cl<sub>2</sub>O<sub>11</sub>Te<sub>6</sub>, Cl<sub>2</sub>O<sub>5</sub>Pb<sub>3</sub>W, Cl<sub>3</sub>Cs<sub>2</sub>Li, Cl<sub>3</sub>F<sub>10</sub>K<sub>3</sub>Sn<sub>5</sub>, Cl<sub>4</sub>CsLi<sub>3</sub>, Cl<sub>4</sub>Cs<sub>2</sub>Pd, Cl<sub>4</sub>Cs<sub>2</sub>Pt, CsHgLaSe<sub>3</sub>, CsHgSe<sub>3</sub>Y, CsLaTe<sub>3</sub>Zn, CsNaO<sub>3</sub>Ti, CsScSe<sub>5</sub>U, CsSe<sub>3</sub>YZn, CsTe<sub>3</sub>YZn, Cs<sub>2</sub>F<sub>4</sub>OTe, Cs<sub>2</sub>O<sub>3</sub>Pb, Cs<sub>2</sub>O<sub>3</sub>Zr, Cs<sub>2</sub>P<sub>2</sub>Pt, Cs<sub>2</sub>PdSb<sub>2</sub>, Cs<sub>2</sub>PtSb<sub>2</sub>, Cs<sub>2</sub>Se<sub>3</sub>Zr, Cs<sub>2</sub>Te<sub>5</sub>, Cs<sub>3</sub>NaPb<sub>4</sub>, F<sub>10</sub>Pb<sub>3</sub>Zr, F<sub>14</sub>I<sub>2</sub>Pb<sub>8</sub>, F<sub>2</sub>InaO<sub>2</sub>, F<sub>2</sub>O<sub>2</sub>Xe, F<sub>3</sub>ISn<sub>2</sub>, F<sub>3</sub>MgNa, F<sub>4</sub>K<sub>2</sub>OTe, F<sub>4</sub>MgSr, F<sub>5</sub>K<sub>2</sub>Sb, F<sub>6</sub>K<sub>2</sub>Zr, F<sub>6</sub>Rb<sub>2</sub>U, Ga, Ga<sub>13</sub>K<sub>3</sub>, GaLa, GaLu, GaSc, GaU, GaY, GeLa, GeLi<sub>4</sub>O<sub>4</sub>, GeMgO<sub>3</sub>, GeNa<sub>2</sub>Zn, GeS, Ge<sub>2</sub>Hf, Ge<sub>2</sub>Pt<sub>3</sub>, Ge<sub>2</sub>Th, Ge<sub>2</sub>U, Ge<sub>3</sub>La<sub>2</sub>Li<sub>2</sub>, Ge<sub>4</sub>Na<sub>4</sub>S<sub>10</sub>, Ge<sub>4</sub>Na<sub>4</sub>Se<sub>10</sub>, Ge<sub>6</sub>La<sub>2</sub>Zn<sub>3</sub>, Ge<sub>8</sub>Na<sub>15</sub>PSn, HfO<sub>3</sub>Sr, HfPd, HfPt, HfSi<sub>2</sub>, HfTe<sub>5</sub>, HgNa, HgNa<sub>2</sub>Pb, HgTe, In, IK<sub>4</sub>P<sub>21</sub>, IP<sub>21</sub>Rb<sub>4</sub>, ITl, I<sub>3</sub>La, I<sub>3</sub>PbTl, InSb, In<sub>2</sub>PdSr, In<sub>2</sub>PtSr, In<sub>4</sub>PbSr<sub>3</sub>, In<sub>4</sub>PdSr, In<sub>4</sub>PtSr, In<sub>5</sub>La<sub>3</sub>, In<sub>5</sub>Y<sub>3</sub>, KNb<sub>3</sub>O<sub>8</sub>,</p> |

Part 10 of all the predicted materials with band crossings from **Cases 1** or **2**:

|    |                                                                                                                                                                                                                                                                                                                                                                                                                                                                                                                                                                                                                                                                                                                                                                                                                                                                                                                                                                                                                                                                                                                                                                                                                                                                                                                                                                                                                                                                                                                                                                                                                                                                                                                                                                                                                                                                                                                                                                                                                                                                                                                                                                                                                                                                                                                                                                                                                                                                                                                                                                                                                                                                                                                                                                                                |
|----|------------------------------------------------------------------------------------------------------------------------------------------------------------------------------------------------------------------------------------------------------------------------------------------------------------------------------------------------------------------------------------------------------------------------------------------------------------------------------------------------------------------------------------------------------------------------------------------------------------------------------------------------------------------------------------------------------------------------------------------------------------------------------------------------------------------------------------------------------------------------------------------------------------------------------------------------------------------------------------------------------------------------------------------------------------------------------------------------------------------------------------------------------------------------------------------------------------------------------------------------------------------------------------------------------------------------------------------------------------------------------------------------------------------------------------------------------------------------------------------------------------------------------------------------------------------------------------------------------------------------------------------------------------------------------------------------------------------------------------------------------------------------------------------------------------------------------------------------------------------------------------------------------------------------------------------------------------------------------------------------------------------------------------------------------------------------------------------------------------------------------------------------------------------------------------------------------------------------------------------------------------------------------------------------------------------------------------------------------------------------------------------------------------------------------------------------------------------------------------------------------------------------------------------------------------------------------------------------------------------------------------------------------------------------------------------------------------------------------------------------------------------------------------------------|
| 63 | <p>K<sub>2</sub>O<sub>3</sub>Ti, K<sub>2</sub>P<sub>2</sub>Pd, LaLiSn<sub>2</sub>, LaSi, La<sub>2</sub>Li<sub>2</sub>Si<sub>3</sub>, La<sub>2</sub>PbZn<sub>5</sub>, La<sub>2</sub>SnZn<sub>5</sub>, La<sub>2</sub>Te<sub>5</sub>, La<sub>3</sub>NbO<sub>7</sub>, La<sub>3</sub>O<sub>7</sub>Sb, La<sub>3</sub>O<sub>7</sub>Ta, La<sub>3</sub>Tl<sub>5</sub>, LiLuSn<sub>2</sub>, Li<sub>2</sub>Nb<sub>2</sub>O<sub>7</sub>Sr, Li<sub>2</sub>O<sub>4</sub>S, Li<sub>2</sub>O<sub>7</sub>SrTa<sub>2</sub>, Li<sub>4</sub>O<sub>4</sub>Pb, Li<sub>4</sub>O<sub>4</sub>Ti, Lu<sub>3</sub>Tl<sub>5</sub>, MgO<sub>3</sub>Si, MgO<sub>4</sub>S, MgO<sub>4</sub>Se, Mg<sub>2</sub>PdSr, MoNNa<sub>5</sub>O<sub>4</sub>, Mo<sub>9</sub>Se<sub>11</sub>, NO<sub>2</sub>SiY, N<sub>3</sub>TaTh, N<sub>5</sub>Ta<sub>3</sub>, NaNbO<sub>3</sub>, NaO<sub>3</sub>Ta, Na<sub>2</sub>O<sub>4</sub>S, Na<sub>2</sub>S<sub>5</sub>Si<sub>2</sub>, Na<sub>2</sub>Tl<sub>2</sub>, Na<sub>4</sub>Si<sub>10</sub>Si<sub>4</sub>, Na<sub>4</sub>Se<sub>10</sub>Si<sub>4</sub>, Na<sub>5</sub>Sn<sub>13</sub>, Na<sub>6</sub>O<sub>5</sub>Pb, O<sub>14</sub>Si<sub>4</sub>Sr<sub>2</sub>Ti<sub>2</sub>, O<sub>2</sub>Te, O<sub>3</sub>SrZr, O<sub>4</sub>SiTi, O<sub>5</sub>Ti<sub>3</sub>, O<sub>6</sub>Pb<sub>3</sub>S, O<sub>7</sub>SbY<sub>3</sub>, O<sub>7</sub>Sn<sub>2</sub>Sr<sub>3</sub>, O<sub>7</sub>Sr<sub>2</sub>Ta<sub>2</sub>, O<sub>7</sub>TaY<sub>3</sub>, O<sub>8</sub>U<sub>3</sub>, PbS, PbSr, Pb<sub>4</sub>Se<sub>4</sub>, PdSr, PdSrTl<sub>2</sub>, PdZr, Pd<sub>3</sub>Te<sub>2</sub>, Pd<sub>3</sub>Ti<sub>2</sub>, PtTh, PtU, PtZr, SiZr, Si<sub>24</sub>, Si<sub>2</sub>Ti, Si<sub>2</sub>Zr, Si<sub>6</sub>Sr, SnSr, SnTi<sub>3</sub>, Sn<sub>2</sub>Th, Sn<sub>4</sub>Sr, Sn<sub>5</sub>Sr<sub>3</sub>, TeZn, Te<sub>3</sub>U, Te<sub>5</sub>Zr, TiZn<sub>16</sub>, Tl<sub>5</sub>Y<sub>3</sub>, U,</p>                                                                                                                                                                                                                                                                                                                                                                                                                                                                                                                                                                                                                                                                                                                                                                                                                                                                                |
| 64 | <p>AgNO<sub>3</sub>, Ag<sub>2</sub>Cl<sub>4</sub>Pd, Ag<sub>2</sub>HfS<sub>3</sub>, AlBa<sub>3</sub>Sb<sub>3</sub>, AlLi, AlLiNa<sub>2</sub>P<sub>2</sub>, AlSb<sub>3</sub>Sr<sub>3</sub>, As, AsHg<sub>4</sub>I<sub>5</sub>, As<sub>2</sub>GaK<sub>2</sub>Li, As<sub>2</sub>GaLiNa<sub>2</sub>, As<sub>2</sub>InK<sub>2</sub>Li, As<sub>3</sub>In<sub>2</sub>K<sub>3</sub>, As<sub>6</sub>K<sub>6</sub>Na<sub>4</sub>Sn<sub>2</sub>, Au<sub>3</sub>Zn, B<sub>12</sub>Li<sub>2</sub>Si<sub>2</sub>, B<sub>2</sub>BaSe<sub>6</sub>, B<sub>2</sub>Br<sub>4</sub>Cl<sub>6</sub>N<sub>2</sub>P<sub>2</sub>, BaGe<sub>2</sub>O<sub>5</sub>, BaN<sub>2</sub>Si, BaO<sub>14</sub>Sr<sub>4</sub>U<sub>3</sub>, Ba<sub>2</sub>Bi<sub>4</sub>Cd<sub>3</sub>, Ba<sub>2</sub>Ca<sub>2</sub>Sn<sub>6</sub>, Ba<sub>2</sub>F<sub>6</sub>Pd, Ba<sub>2</sub>Ge<sub>4</sub>Pd<sub>5</sub>, Ba<sub>4</sub>O<sub>10</sub>PtTi<sub>2</sub>, Ba<sub>4</sub>OP<sub>2</sub>, Ba<sub>5</sub>P<sub>4</sub>, Ba<sub>5</sub>Sb<sub>4</sub>, Ba<sub>6</sub>Ga<sub>2</sub>P<sub>6</sub>, BiSn, Bi<sub>2</sub>MoO<sub>6</sub>, Bi<sub>5</sub>BrO<sub>7</sub>, Br, Br<sub>12</sub>Mo<sub>6</sub>, Br<sub>12</sub>W<sub>6</sub>, Br<sub>14</sub>Ta<sub>6</sub>, Br<sub>16</sub>W<sub>6</sub>, Br<sub>2</sub>, CCl<sub>14</sub>Ti<sub>6</sub>, CCl<sub>14</sub>Zr<sub>6</sub>, Cl<sub>14</sub>Zr<sub>6</sub>, CO<sub>2</sub>, CS<sub>2</sub>, CSe<sub>2</sub>, C<sub>2</sub>B<sub>2</sub>Mg, C<sub>2</sub>N<sub>2</sub>Se, Ca, CaO<sub>4</sub>Se, CaO<sub>4</sub>W, Ca<sub>2</sub>N<sub>3</sub>P, Ca<sub>5</sub>Ga<sub>2</sub>N<sub>4</sub>, Ca<sub>5</sub>O<sub>14</sub>Te<sub>3</sub>, CdClIO<sub>3</sub>, Cl, Cl<sub>12</sub>Mo<sub>6</sub>, Cl<sub>14</sub>Nb<sub>6</sub>, Cl<sub>16</sub>Li<sub>2</sub>Nb<sub>6</sub>, Cl<sub>2</sub>, Cs, Cs<sub>3</sub>Na<sub>2</sub>P<sub>3</sub>Sn, Cs<sub>4</sub>F<sub>10</sub>Mg<sub>3</sub>, Cs<sub>4</sub>F<sub>10</sub>Zn<sub>3</sub>, F<sub>3</sub>Na<sub>2</sub>O<sub>4</sub>SSb, Ga, Ge, GeN<sub>2</sub>Sr<sub>2</sub>, HgO<sub>4</sub>W, I, I<sub>14</sub>Ta<sub>6</sub>, I<sub>2</sub>, I<sub>2</sub>Mo, InK<sub>2</sub>NaSb<sub>2</sub>, In<sub>9</sub>KNa<sub>3</sub>, K, KLiO, KTi, K<sub>2</sub>O<sub>2</sub>, K<sub>3</sub>Na<sub>2</sub>P<sub>3</sub>Sn, K<sub>4</sub>Sn<sub>2</sub>Te<sub>6</sub>, LaS, La<sub>2</sub>O<sub>2</sub>S<sub>2</sub>, Li, LiTi, Mo<sub>2</sub>Na<sub>2</sub>O<sub>7</sub>, Na<sub>2</sub>O<sub>7</sub>W<sub>2</sub>, Na<sub>4</sub>P<sub>2</sub>Se<sub>6</sub>, NbP<sub>2</sub>S<sub>8</sub>, O<sub>2</sub>Si, O<sub>3</sub>Rb<sub>2</sub>Ti, O<sub>4</sub>PbW, O<sub>4</sub>SnSr<sub>2</sub>, O<sub>4</sub>WZn, O<sub>5</sub>Si<sub>2</sub>Sr, P, PdSn<sub>3</sub>, Pd<sub>8</sub>Sn<sub>24</sub>, Rb, Sn<sub>3</sub>Ti<sub>2</sub>,</p> |
| 66 | <p>Al<sub>2</sub>PbS<sub>4</sub>, Al<sub>2</sub>S<sub>4</sub>Sr, Al<sub>2</sub>Se<sub>4</sub>Sr, BaGa<sub>2</sub>Se<sub>4</sub>, Baln<sub>2</sub>Te<sub>4</sub>, Ba<sub>3</sub>S<sub>7</sub>Zr<sub>2</sub>, CaGa<sub>2</sub>S<sub>4</sub>, Ga<sub>2</sub>PbSe<sub>4</sub>, Ga<sub>2</sub>S<sub>4</sub>Sr, Ga<sub>2</sub>Se<sub>4</sub>Sr, Ga<sub>2</sub>SrTe<sub>4</sub>, I<sub>3</sub>Th, In<sub>2</sub>SrTe<sub>4</sub>,</p>                                                                                                                                                                                                                                                                                                                                                                                                                                                                                                                                                                                                                                                                                                                                                                                                                                                                                                                                                                                                                                                                                                                                                                                                                                                                                                                                                                                                                                                                                                                                                                                                                                                                                                                                                                                                                                                                                                                                                                                                                                                                                                                                                                                                                                                                                                                                                                 |
| 67 | <p>AgClO<sub>2</sub>, AlB<sub>3</sub>CaO<sub>7</sub>, Al<sub>4</sub>O<sub>7</sub>Sr, Au<sub>2</sub>Cd<sub>2</sub>Cs<sub>2</sub>S<sub>4</sub>, BaF<sub>6</sub>Zr, C, ClFOPb<sub>2</sub>, Cl<sub>9</sub>PSn, F<sub>3</sub>La, F<sub>6</sub>PaRb, F<sub>6</sub>PbZr, OPb,</p>                                                                                                                                                                                                                                                                                                                                                                                                                                                                                                                                                                                                                                                                                                                                                                                                                                                                                                                                                                                                                                                                                                                                                                                                                                                                                                                                                                                                                                                                                                                                                                                                                                                                                                                                                                                                                                                                                                                                                                                                                                                                                                                                                                                                                                                                                                                                                                                                                                                                                                                     |
| 68 | <p>Al<sub>2</sub>F<sub>16</sub>Sr<sub>5</sub>, AuNaS, CaCl<sub>2</sub>O<sub>4</sub>, Cl<sub>2</sub>O<sub>4</sub>Pb, Cl<sub>2</sub>O<sub>4</sub>Sr, K<sub>4</sub>Se<sub>8</sub>Sn<sub>3</sub>, O<sub>2</sub>Si, Pd<sub>4</sub>Sn<sub>16</sub>, PtSn<sub>4</sub>,</p>                                                                                                                                                                                                                                                                                                                                                                                                                                                                                                                                                                                                                                                                                                                                                                                                                                                                                                                                                                                                                                                                                                                                                                                                                                                                                                                                                                                                                                                                                                                                                                                                                                                                                                                                                                                                                                                                                                                                                                                                                                                                                                                                                                                                                                                                                                                                                                                                                                                                                                                            |
| 70 | <p>AgCs<sub>2</sub>NbS<sub>4</sub>, AgCs<sub>2</sub>NbSe<sub>4</sub>, AgCs<sub>2</sub>S<sub>4</sub>Ta, AgK<sub>2</sub>NbS<sub>4</sub>, AgK<sub>2</sub>S<sub>4</sub>Ta, AgNbRb<sub>2</sub>S<sub>4</sub>, AgNbRb<sub>2</sub>Se<sub>4</sub>, AgRb<sub>2</sub>S<sub>4</sub>Ta, Ag<sub>2</sub>Ba<sub>4</sub>Si<sub>6</sub>, Ag<sub>2</sub>GeK<sub>2</sub>Se<sub>4</sub>, Ag<sub>2</sub>O<sub>4</sub>S, Ag<sub>2</sub>O<sub>4</sub>Se, Al<sub>2</sub>CaS<sub>4</sub>, Al<sub>2</sub>S<sub>4</sub>Sr, AsMoO<sub>6</sub>Rb, As<sub>2</sub>Na<sub>2</sub>O<sub>8</sub>Th, AuLiS, Au<sub>2</sub>BaP<sub>4</sub>, Au<sub>2</sub>Cs<sub>2</sub>S<sub>4</sub>Sn, B<sub>2</sub>BaBe<sub>2</sub>O<sub>6</sub>, BaCl<sub>2</sub>O<sub>8</sub>, Ba<sub>2</sub>CaN<sub>4</sub>W, Ba<sub>3</sub>GeI<sub>2</sub>, Ba<sub>3</sub>I<sub>2</sub>Si, Ba<sub>4</sub>Ge<sub>6</sub>Li<sub>2</sub>, Ba<sub>4</sub>Li<sub>2</sub>Si<sub>6</sub>, Ba<sub>4</sub>MgN<sub>6</sub>Si<sub>2</sub>, BiCa<sub>2</sub>Na<sub>3</sub>O<sub>6</sub>, CaGa<sub>2</sub>S<sub>4</sub>, Ca<sub>2</sub>Na<sub>3</sub>O<sub>6</sub>Ta, Cd<sub>2</sub>O<sub>4</sub>Si, CsTi, FInO, Ga<sub>2</sub>PbS<sub>4</sub>, Ga<sub>2</sub>PbSe<sub>4</sub>, Ga<sub>2</sub>S<sub>4</sub>Sr, Ga<sub>4</sub>LaNaSe<sub>8</sub>, GeHg<sub>2</sub>O<sub>4</sub>, Ge<sub>2</sub>Ti, Ge<sub>6</sub>Li<sub>2</sub>Sr<sub>4</sub>, In<sub>2</sub>S<sub>4</sub>Sr, In<sub>2</sub>Se<sub>4</sub>Sr, K<sub>2</sub>Pd<sub>3</sub>S<sub>4</sub>, K<sub>4</sub>P<sub>6</sub>, Li<sub>2</sub>Si<sub>6</sub>Sr<sub>4</sub>, Lu<sub>2</sub>Te<sub>3</sub>, MoNa<sub>2</sub>O<sub>4</sub>, Na<sub>2</sub>O<sub>3</sub>Pt, Na<sub>2</sub>O<sub>4</sub>S, Na<sub>2</sub>O<sub>4</sub>Se, NbSn<sub>2</sub>, Nb<sub>2</sub>O<sub>10</sub>TiU, O<sub>2</sub>Si, O<sub>3</sub>U, P<sub>2</sub>S<sub>7</sub>U, Pd<sub>3</sub>Rb<sub>2</sub>S<sub>4</sub>, Pd<sub>3</sub>Rb<sub>2</sub>Se<sub>4</sub>, Rb, S<sub>3</sub>Sc<sub>2</sub>, S<sub>8</sub>, SbSnTi, Sc<sub>2</sub>Te<sub>3</sub>, Se<sub>3</sub>Y<sub>2</sub>, Si<sub>2</sub>Ti, Sn<sub>2</sub>Ta, Sn<sub>2</sub>Zr, Te<sub>3</sub>Y<sub>2</sub>,</p>                                                                                                                                                                                                                                                                                                                                                                                                                                                                                                                                                                                                                                                                 |
| 72 | <p>AgN<sub>3</sub>, AgNa<sub>3</sub>O<sub>2</sub>, AgNa<sub>3</sub>S<sub>2</sub>, AgNb<sub>3</sub>O<sub>8</sub>, Ag<sub>3</sub>LiO<sub>2</sub>, Ag<sub>3</sub>NaO<sub>2</sub>, AlAs<sub>2</sub>K<sub>2</sub>Na, AlAs<sub>2</sub>Na<sub>3</sub>, AlK<sub>2</sub>LiP<sub>2</sub>, AlK<sub>2</sub>NaP<sub>2</sub>, AlNa<sub>3</sub>P<sub>2</sub>, As<sub>2</sub>Ba<sub>2</sub>Zn, As<sub>2</sub>Cs<sub>2</sub>Si, As<sub>2</sub>Cs<sub>2</sub>Sn, As<sub>2</sub>GaK<sub>2</sub>Na, As<sub>2</sub>GeK<sub>2</sub>, As<sub>2</sub>InK<sub>2</sub>Na, As<sub>2</sub>K<sub>2</sub>Si, As<sub>2</sub>Rb<sub>2</sub>Si, As<sub>2</sub>Rb<sub>2</sub>Sn, AuKS<sub>5</sub>, AuKSe<sub>5</sub>,</p>                                                                                                                                                                                                                                                                                                                                                                                                                                                                                                                                                                                                                                                                                                                                                                                                                                                                                                                                                                                                                                                                                                                                                                                                                                                                                                                                                                                                                                                                                                                                                                                                                                                                                                                                                                                                                                                                                                                                                                                                                                                                                                        |



Part 11 of all the predicted materials with band crossings from **Cases 1** or **2**:

|    |                                                                                                                                                                                                                                                                                                                                                                                                                                                                                                                                                                                                                                                                                                                                                                                                                                                                                                                                                                                                                                                                                                                                                                                                                                                                                                                                                                                                                                                                                                                                                                                                                                                                                                                                                                                                                                                                                                                                                                                                                                                                                                                                                                                                                                                                                                                                                                                                                                               |
|----|-----------------------------------------------------------------------------------------------------------------------------------------------------------------------------------------------------------------------------------------------------------------------------------------------------------------------------------------------------------------------------------------------------------------------------------------------------------------------------------------------------------------------------------------------------------------------------------------------------------------------------------------------------------------------------------------------------------------------------------------------------------------------------------------------------------------------------------------------------------------------------------------------------------------------------------------------------------------------------------------------------------------------------------------------------------------------------------------------------------------------------------------------------------------------------------------------------------------------------------------------------------------------------------------------------------------------------------------------------------------------------------------------------------------------------------------------------------------------------------------------------------------------------------------------------------------------------------------------------------------------------------------------------------------------------------------------------------------------------------------------------------------------------------------------------------------------------------------------------------------------------------------------------------------------------------------------------------------------------------------------------------------------------------------------------------------------------------------------------------------------------------------------------------------------------------------------------------------------------------------------------------------------------------------------------------------------------------------------------------------------------------------------------------------------------------------------|
| 72 | AuLi <sub>3</sub> S <sub>2</sub> , Au <sub>4</sub> CdK <sub>2</sub> S <sub>4</sub> , Ba <sub>2</sub> Bi <sub>2</sub> Zn, Ba <sub>2</sub> Br <sub>2</sub> O, Ba <sub>2</sub> I <sub>2</sub> O, Ba <sub>2</sub> Sb <sub>2</sub> Zn, BeBr <sub>2</sub> , BeCl <sub>2</sub> , BeI <sub>2</sub> , BiLiO <sub>2</sub> , Br <sub>2</sub> Hg <sub>5</sub> O <sub>4</sub> , Cd <sub>3</sub> Cs <sub>2</sub> Te <sub>4</sub> , Cl <sub>2</sub> Hg <sub>5</sub> O <sub>4</sub> , Cl <sub>3</sub> La <sub>2</sub> N, Cl <sub>6</sub> Cs <sub>2</sub> Pd <sub>2</sub> , Cs <sub>2</sub> GaLi <sub>3</sub> O <sub>4</sub> , Cs <sub>2</sub> Hg <sub>3</sub> S <sub>4</sub> , Cs <sub>2</sub> Hg <sub>3</sub> Se <sub>4</sub> , Cs <sub>2</sub> P <sub>2</sub> Si, Cs <sub>2</sub> S <sub>4</sub> Zn <sub>3</sub> , F <sub>11</sub> LaZr <sub>2</sub> , GaK <sub>2</sub> NaP <sub>2</sub> , Ga <sub>2</sub> Mg <sub>5</sub> , Ge <sub>5</sub> Ti <sub>6</sub> , Hg <sub>2</sub> O <sub>3</sub> Se, I <sub>2</sub> OSr <sub>2</sub> , InK <sub>2</sub> NaP <sub>2</sub> , InK <sub>3</sub> P <sub>2</sub> , In <sub>2</sub> Mg <sub>5</sub> , K <sub>2</sub> O <sub>2</sub> Zn, K <sub>2</sub> P <sub>2</sub> Si, K <sub>2</sub> Te <sub>2</sub> Zn, MgO, Mg <sub>5</sub> Tl <sub>2</sub> , NaNb <sub>3</sub> O <sub>8</sub> , NaO <sub>8</sub> Ta <sub>3</sub> , Na <sub>2</sub> S <sub>2</sub> Zn, O <sub>2</sub> Si, Pb <sub>5</sub> Sc <sub>6</sub> , Pt <sub>3</sub> Sb <sub>2</sub> , Pt <sub>5</sub> Ti <sub>3</sub> , Rb <sub>2</sub> S <sub>4</sub> Zn <sub>3</sub> , S <sub>2</sub> Si, Se <sub>2</sub> Si,                                                                                                                                                                                                                                                                                                                                                                                                                                                                                                                                                                                                                                                                                                                                                                                                                                         |
| 73 | AlAs <sub>2</sub> Li <sub>3</sub> , AlLi <sub>3</sub> P <sub>2</sub> , BiPS <sub>4</sub> , Bi <sub>3</sub> K <sub>3</sub> Na <sub>2</sub> Sn, Li <sub>4</sub> N <sub>3</sub> Ta,                                                                                                                                                                                                                                                                                                                                                                                                                                                                                                                                                                                                                                                                                                                                                                                                                                                                                                                                                                                                                                                                                                                                                                                                                                                                                                                                                                                                                                                                                                                                                                                                                                                                                                                                                                                                                                                                                                                                                                                                                                                                                                                                                                                                                                                              |
| 74 | Ag <sub>2</sub> Ba, Ag <sub>2</sub> Ca, Ag <sub>2</sub> O <sub>7</sub> Te <sub>2</sub> , Ag <sub>2</sub> Sr, AlB <sub>14</sub> Li, AlF <sub>7</sub> MgNa <sub>2</sub> , AlF <sub>7</sub> Na <sub>2</sub> Zn, AlLaO <sub>3</sub> , Al <sub>2</sub> Sr, Au <sub>2</sub> Ca, Au <sub>2</sub> Sr, Au <sub>5</sub> K <sub>3</sub> Pb, B <sub>15</sub> Na, B <sub>3</sub> Si, B <sub>7</sub> Mg, BaCd <sub>2</sub> , BaGe <sub>5</sub> , BaHg <sub>2</sub> , BaIn <sub>2</sub> , BaO <sub>3</sub> Pb, BaZn <sub>2</sub> , Ba <sub>2</sub> O <sub>7</sub> U <sub>2</sub> , Be <sub>2</sub> K <sub>2</sub> O <sub>11</sub> Si <sub>3</sub> Zn <sub>2</sub> , C <sub>2</sub> B <sub>12</sub> Mg, C <sub>2</sub> B <sub>13</sub> Li, CaCd <sub>2</sub> , CaO <sub>3</sub> Si, CaZn <sub>2</sub> , Ca <sub>2</sub> O <sub>7</sub> Sb <sub>2</sub> , Cd <sub>2</sub> O <sub>7</sub> Sb <sub>2</sub> , Cd <sub>2</sub> Sr, CsF <sub>3</sub> MoO <sub>2</sub> , CsF <sub>5</sub> Pd <sub>2</sub> , F <sub>5</sub> Pd <sub>2</sub> Rb, Ge, HfO <sub>3</sub> Sr, Hg <sub>2</sub> Sr, Hg <sub>3</sub> I <sub>2</sub> S <sub>2</sub> , Hg <sub>3</sub> I <sub>2</sub> Se <sub>2</sub> , KNa <sub>2</sub> O <sub>15</sub> Si <sub>6</sub> Y, LaNb <sub>2</sub> O <sub>7</sub> Rb, MgO <sub>4</sub> U, Mg <sub>2</sub> O <sub>4</sub> Si, MoTi, Na <sub>2</sub> O <sub>7</sub> Te <sub>2</sub> , O <sub>2</sub> PbPd, O <sub>3</sub> SnSr, O <sub>3</sub> SrZr, O <sub>4</sub> SiZn <sub>2</sub> , O <sub>7</sub> Sb <sub>2</sub> Sr <sub>2</sub> , Si, Sr, SrZn <sub>2</sub> , Te,                                                                                                                                                                                                                                                                                                                                                                                                                                                                                                                                                                                                                                                                                                                                                                                                                                                                               |
| 76 | BO <sub>2</sub> Tl, Br <sub>5</sub> PbTl <sub>3</sub> , Cl <sub>5</sub> PbTl <sub>3</sub> , Cl <sub>8</sub> ISb, Cs <sub>3</sub> P <sub>7</sub> , Cs <sub>4</sub> Ge <sub>9</sub> , O <sub>3</sub> PbTe,                                                                                                                                                                                                                                                                                                                                                                                                                                                                                                                                                                                                                                                                                                                                                                                                                                                                                                                                                                                                                                                                                                                                                                                                                                                                                                                                                                                                                                                                                                                                                                                                                                                                                                                                                                                                                                                                                                                                                                                                                                                                                                                                                                                                                                      |
| 79 | AlF <sub>5</sub> Sr, BrCl <sub>14</sub> P <sub>3</sub> , Br <sub>4</sub> OW, Cl <sub>3</sub> F <sub>2</sub> Sb, Cl <sub>4</sub> OW,                                                                                                                                                                                                                                                                                                                                                                                                                                                                                                                                                                                                                                                                                                                                                                                                                                                                                                                                                                                                                                                                                                                                                                                                                                                                                                                                                                                                                                                                                                                                                                                                                                                                                                                                                                                                                                                                                                                                                                                                                                                                                                                                                                                                                                                                                                           |
| 80 | Ag <sub>3</sub> BiO <sub>3</sub> , AsNb, Ca <sub>11</sub> O <sub>24</sub> Re <sub>4</sub> , Cs <sub>5</sub> N <sub>10</sub> NaW <sub>4</sub> , Na <sub>2</sub> O <sub>12</sub> W <sub>3</sub> Zr, NbO <sub>2</sub> ,                                                                                                                                                                                                                                                                                                                                                                                                                                                                                                                                                                                                                                                                                                                                                                                                                                                                                                                                                                                                                                                                                                                                                                                                                                                                                                                                                                                                                                                                                                                                                                                                                                                                                                                                                                                                                                                                                                                                                                                                                                                                                                                                                                                                                          |
| 81 | As <sub>5</sub> BO <sub>20</sub> Pb <sub>6</sub> , Au <sub>2</sub> CaF <sub>12</sub> , B <sub>8</sub> Cd <sub>12</sub> Ge <sub>17</sub> O <sub>58</sub> , CO <sub>4</sub> Rb <sub>4</sub> , C <sub>2</sub> Ag <sub>10</sub> F <sub>8</sub> , GeSe <sub>2</sub> , I <sub>3</sub> NaO <sub>8</sub> , KMo <sub>4</sub> O <sub>6</sub> , P <sub>2</sub> S <sub>6</sub> Zr, Ta <sub>22</sub> , Ta <sub>30</sub> ,                                                                                                                                                                                                                                                                                                                                                                                                                                                                                                                                                                                                                                                                                                                                                                                                                                                                                                                                                                                                                                                                                                                                                                                                                                                                                                                                                                                                                                                                                                                                                                                                                                                                                                                                                                                                                                                                                                                                                                                                                                  |
| 82 | AgI <sub>3</sub> O <sub>8</sub> , AgKO, Ag <sub>2</sub> HgI <sub>4</sub> , AlAsO <sub>4</sub> , AlO <sub>4</sub> P, Al <sub>2</sub> Be <sub>2</sub> Cl <sub>2</sub> Na <sub>8</sub> O <sub>24</sub> Si <sub>8</sub> , Al <sub>2</sub> CdS <sub>4</sub> , Al <sub>2</sub> CdSe <sub>4</sub> , Al <sub>2</sub> CdTe <sub>4</sub> , Al <sub>2</sub> HgS <sub>4</sub> , Al <sub>2</sub> HgSe <sub>4</sub> , Al <sub>2</sub> HgTe <sub>4</sub> , Al <sub>2</sub> Se <sub>4</sub> Zn, Al <sub>2</sub> Te <sub>4</sub> Zn, Al <sub>4</sub> Bi <sub>4</sub> Cl <sub>16</sub> S <sub>4</sub> , Al <sub>4</sub> Bi <sub>4</sub> Cl <sub>16</sub> Se <sub>4</sub> , Al <sub>4</sub> Bi <sub>4</sub> Cl <sub>16</sub> Te <sub>4</sub> , AsBO <sub>4</sub> , AsPd <sub>3</sub> , As <sub>4</sub> CsF <sub>13</sub> , Au <sub>2</sub> BaF <sub>8</sub> , BGeLiO <sub>4</sub> , BLiO <sub>4</sub> Si, BaBr <sub>2</sub> F <sub>8</sub> , BeO <sub>4</sub> S, Br <sub>16</sub> Re <sub>4</sub> Te <sub>8</sub> , CF <sub>2</sub> NO <sub>2</sub> P, CK <sub>4</sub> O <sub>4</sub> , CaF <sub>8</sub> HfLi <sub>2</sub> , CdGa <sub>2</sub> S <sub>4</sub> , CdGa <sub>2</sub> Se <sub>4</sub> , CdGa <sub>2</sub> Te <sub>4</sub> , CdIn <sub>2</sub> Se <sub>4</sub> , CdIn <sub>2</sub> Te <sub>4</sub> , CdTe <sub>4</sub> Tl <sub>2</sub> , Cl <sub>16</sub> Re <sub>4</sub> S <sub>4</sub> Te <sub>4</sub> , Cl <sub>16</sub> Re <sub>4</sub> Se <sub>4</sub> Te <sub>4</sub> , Cl <sub>16</sub> Re <sub>4</sub> Te <sub>8</sub> , Cl <sub>4</sub> FTa, F <sub>13</sub> KSb <sub>4</sub> , FK <sub>5</sub> La <sub>4</sub> O <sub>16</sub> Si <sub>4</sub> , FNa <sub>5</sub> O <sub>16</sub> Si <sub>4</sub> Y <sub>4</sub> , GaN <sub>5</sub> O <sub>14</sub> , Ga <sub>2</sub> HgS <sub>4</sub> , Ga <sub>2</sub> HgSe <sub>4</sub> , Ga <sub>2</sub> S <sub>4</sub> Zn, Ga <sub>2</sub> Se <sub>4</sub> Zn, Ga <sub>2</sub> Te <sub>4</sub> Zn, GeHg <sub>2</sub> Se <sub>4</sub> , GeSe <sub>2</sub> , GeTa <sub>3</sub> , GeTi <sub>3</sub> , Hf <sub>3</sub> Sb, HgIn <sub>2</sub> Se <sub>4</sub> , HgIn <sub>2</sub> Te <sub>4</sub> , Hg <sub>2</sub> Se <sub>4</sub> Sn, InPS <sub>4</sub> , In <sub>2</sub> Se <sub>4</sub> Zn, In <sub>2</sub> Te <sub>4</sub> Zn, LiPS <sub>4</sub> Zn, Mo <sub>3</sub> P, Nb <sub>9</sub> O <sub>25</sub> P, PW <sub>3</sub> , SbZr <sub>3</sub> , TeZr <sub>3</sub> , Te <sub>3</sub> Tl <sub>5</sub> , |
| 84 | BiCl <sub>6</sub> Tl <sub>3</sub> , Cl <sub>6</sub> NaSb, Cs <sub>3</sub> I <sub>6</sub> La, F <sub>4</sub> Zr, La <sub>2</sub> O <sub>5</sub> Pd <sub>2</sub> , O <sub>8</sub> SrTe <sub>3</sub> , P <sub>2</sub> S <sub>6</sub> Th, P <sub>2</sub> S <sub>6</sub> U, P <sub>2</sub> S <sub>6</sub> Zr, PdS, PdSe, PtS,                                                                                                                                                                                                                                                                                                                                                                                                                                                                                                                                                                                                                                                                                                                                                                                                                                                                                                                                                                                                                                                                                                                                                                                                                                                                                                                                                                                                                                                                                                                                                                                                                                                                                                                                                                                                                                                                                                                                                                                                                                                                                                                      |
| 85 | AgClO <sub>4</sub> Pb <sub>4</sub> , AgI, Ag <sub>7</sub> CsS <sub>4</sub> , Ag <sub>7</sub> RbS <sub>4</sub> , AsClInbO <sub>5</sub> Rb, AsCl <sub>2</sub> F <sub>3</sub> , As <sub>2</sub> Cl <sub>4</sub> F <sub>6</sub> , Bi <sub>4</sub> Cl <sub>14</sub> Se <sub>4</sub> , Br <sub>2</sub> Sr, Br <sub>9</sub> O <sub>4</sub> Pb <sub>8</sub> Tl, Cl <sub>4</sub> F <sub>6</sub> PSb, Cl <sub>5</sub> P, I <sub>4</sub> O <sub>12</sub> Zr, La <sub>9</sub> O <sub>5</sub> Sb <sub>5</sub> , P <sub>2</sub> U, Se <sub>2</sub> U,                                                                                                                                                                                                                                                                                                                                                                                                                                                                                                                                                                                                                                                                                                                                                                                                                                                                                                                                                                                                                                                                                                                                                                                                                                                                                                                                                                                                                                                                                                                                                                                                                                                                                                                                                                                                                                                                                                       |
| 86 | Ag <sub>4</sub> O <sub>4</sub> Si, AsZr <sub>3</sub> , As <sub>2</sub> O <sub>3</sub> , CK <sub>4</sub> O <sub>4</sub> , F <sub>3</sub> KOTe, GeNb <sub>3</sub> , GeTa <sub>3</sub> , ILiO <sub>3</sub> , Nb <sub>3</sub> Si, PZr <sub>3</sub> , SbY <sub>3</sub> , SiTa <sub>3</sub> ,                                                                                                                                                                                                                                                                                                                                                                                                                                                                                                                                                                                                                                                                                                                                                                                                                                                                                                                                                                                                                                                                                                                                                                                                                                                                                                                                                                                                                                                                                                                                                                                                                                                                                                                                                                                                                                                                                                                                                                                                                                                                                                                                                       |
| 87 | AlF <sub>6</sub> K <sub>3</sub> , Al <sub>3</sub> F <sub>19</sub> Pb <sub>5</sub> , Au <sub>4</sub> Ti, BBa <sub>2</sub> Cl <sub>17</sub> Zr <sub>6</sub> , BaF <sub>11</sub> LiZr <sub>2</sub> , Ba <sub>2</sub> CaO <sub>6</sub> W, Ba <sub>2</sub> O <sub>6</sub> TaY, BiF <sub>5</sub> , Br <sub>5</sub> Hg <sub>6</sub> S <sub>4</sub> Tl, Br <sub>5</sub> Hg <sub>6</sub> Se <sub>4</sub> Tl, Br <sub>6</sub> Rb <sub>2</sub> Te, C <sub>4</sub> Al <sub>4</sub> Th, CdO <sub>6</sub> Sr <sub>2</sub> W, Cl <sub>16</sub> Hg <sub>3</sub> Tl <sub>10</sub> , CsGe <sub>4</sub> Li <sub>12</sub> Na <sub>3</sub> O <sub>16</sub> , CsKLi <sub>12</sub> Na <sub>2</sub> O <sub>16</sub> Si <sub>4</sub> , F <sub>13</sub> KSb <sub>4</sub> , F <sub>6</sub> OXe <sub>2</sub> , F <sub>7</sub> IXe, GaO <sub>6</sub> SbSr <sub>2</sub> , GaO <sub>6</sub> Sr <sub>2</sub> Ta, Ga <sub>2</sub> Te <sub>5</sub> ,                                                                                                                                                                                                                                                                                                                                                                                                                                                                                                                                                                                                                                                                                                                                                                                                                                                                                                                                                                                                                                                                                                                                                                                                                                                                                                                                                                                                                                                                                                                            |

Part 12 of all the predicted materials with band crossings from **Cases 1** or **2**:

|     |                                                                                                                                                                                                                                                                                                                                                                                                                                                                                                                                                                                                                                                                                                                                                                                                                                                                                                                                                                                                                                                                                                                                                                                                                                                                                                                                                                                                                                                                                                                                                                                                                        |
|-----|------------------------------------------------------------------------------------------------------------------------------------------------------------------------------------------------------------------------------------------------------------------------------------------------------------------------------------------------------------------------------------------------------------------------------------------------------------------------------------------------------------------------------------------------------------------------------------------------------------------------------------------------------------------------------------------------------------------------------------------------------------------------------------------------------------------------------------------------------------------------------------------------------------------------------------------------------------------------------------------------------------------------------------------------------------------------------------------------------------------------------------------------------------------------------------------------------------------------------------------------------------------------------------------------------------------------------------------------------------------------------------------------------------------------------------------------------------------------------------------------------------------------------------------------------------------------------------------------------------------------|
| 87  | Hf <sub>5</sub> Te <sub>4</sub> , I <sub>12</sub> K <sub>4</sub> O <sub>7</sub> Ti <sub>4</sub> , InO <sub>6</sub> Sr <sub>2</sub> Ta, K <sub>5</sub> Te <sub>3</sub> , La <sub>2</sub> MoO <sub>5</sub> , Li <sub>12</sub> Na <sub>3</sub> O <sub>16</sub> RbSi <sub>4</sub> , Li <sub>4</sub> O <sub>5</sub> U, MgMoO <sub>6</sub> Sr <sub>2</sub> , MgO <sub>6</sub> ReSr <sub>2</sub> , MgO <sub>6</sub> Sr <sub>2</sub> W, MoO <sub>6</sub> Sr <sub>2</sub> Zn, O <sub>3</sub> PbTi, O <sub>5</sub> Ti <sub>4</sub> , O <sub>6</sub> Sr <sub>2</sub> TaY, O <sub>6</sub> Sr <sub>2</sub> TiZr, O <sub>6</sub> Sr <sub>2</sub> WZn, Se <sub>4</sub> Ti <sub>5</sub> , Te <sub>3</sub> Tl <sub>5</sub> , Te <sub>4</sub> Ti <sub>5</sub> , Te <sub>4</sub> Zr <sub>5</sub> ,                                                                                                                                                                                                                                                                                                                                                                                                                                                                                                                                                                                                                                                                                                                                                                                                                                        |
| 88  | AgO, AsBiO <sub>4</sub> , AsCa <sub>2</sub> O <sub>12</sub> W <sub>2</sub> Y, Au <sub>2</sub> BaO <sub>4</sub> , Au <sub>2</sub> CaO <sub>4</sub> , Au <sub>2</sub> O <sub>4</sub> Sr, BaF <sub>11</sub> NaZr <sub>2</sub> , BaMoO <sub>4</sub> , BaO <sub>4</sub> W, BiF <sub>4</sub> Li, BrCsO <sub>4</sub> , Br <sub>4</sub> Th, Br <sub>6</sub> Rb <sub>2</sub> Sb, CaF <sub>4</sub> Zn, CaMg <sub>3</sub> N <sub>4</sub> Si, CaMoO <sub>4</sub> , CaO <sub>4</sub> Se, CaO <sub>4</sub> W, CdMoO <sub>4</sub> , Cl <sub>4</sub> KTI, Cl <sub>4</sub> SrZn, Cl <sub>4</sub> Th, Cl <sub>4</sub> Tl <sub>2</sub> , F <sub>4</sub> LiSc, F <sub>4</sub> LiY, F <sub>4</sub> SrZn, F <sub>7</sub> K <sub>3</sub> U, GeHfO <sub>4</sub> , GeLi, GeLi <sub>3</sub> NaO <sub>4</sub> , GeO <sub>4</sub> Th, GeO <sub>4</sub> U, GeO <sub>4</sub> Zr, Hg <sub>16</sub> Rb <sub>15</sub> , IInSe, IKO <sub>4</sub> , INaO <sub>4</sub> , IO <sub>4</sub> Rb, IO <sub>4</sub> Tl, LaMo <sub>4</sub> Na <sub>5</sub> O <sub>16</sub> , LaNbO <sub>4</sub> , LiSi, LuO <sub>4</sub> P, MoO <sub>4</sub> Pb, MoO <sub>4</sub> Sr, Mo <sub>4</sub> Na <sub>4</sub> O <sub>16</sub> U, Mo <sub>4</sub> Na <sub>4</sub> O <sub>16</sub> Zr, Na <sub>2</sub> O <sub>5</sub> Si <sub>2</sub> , Na <sub>5</sub> O <sub>16</sub> W <sub>4</sub> Y, NbO <sub>2</sub> , O <sub>24</sub> Re <sub>4</sub> Sr <sub>11</sub> , O <sub>2</sub> Ta, O <sub>4</sub> PbPd <sub>2</sub> , O <sub>4</sub> PbW, O <sub>4</sub> SiTi, O <sub>4</sub> SiZr, O <sub>4</sub> SrW, P <sub>4</sub> Si <sub>12</sub> U, Pd <sub>2</sub> S <sub>4</sub> U, |
| 91  | Ag <sub>3</sub> O <sub>4</sub> Sb, CBTh, LiNbO <sub>4</sub> Zn, Li <sub>2</sub> O <sub>4</sub> Te, O <sub>4</sub> TiZn <sub>2</sub> ,                                                                                                                                                                                                                                                                                                                                                                                                                                                                                                                                                                                                                                                                                                                                                                                                                                                                                                                                                                                                                                                                                                                                                                                                                                                                                                                                                                                                                                                                                  |
| 92  | AlKO <sub>2</sub> , AlLiO <sub>2</sub> , As <sub>2</sub> O <sub>5</sub> , As <sub>4</sub> Mg, Au <sub>5</sub> F <sub>21</sub> Pr <sub>2</sub> , CO <sub>2</sub> , Ca, Ca <sub>2</sub> P <sub>4</sub> Si <sub>2</sub> , CdP <sub>2</sub> , F <sub>2</sub> Sn, GeO <sub>2</sub> , Ge <sub>2</sub> Lu <sub>2</sub> O <sub>7</sub> , Ge <sub>4</sub> Zr <sub>5</sub> , Hf <sub>5</sub> Si <sub>4</sub> , I <sub>8</sub> Pt <sub>3</sub> , La <sub>5</sub> Si <sub>4</sub> , O <sub>2</sub> Si, O <sub>2</sub> Te, P <sub>2</sub> Zn, P <sub>4</sub> Zn, S <sub>2</sub> Tl <sub>2</sub> , Si <sub>4</sub> Zr <sub>5</sub> ,                                                                                                                                                                                                                                                                                                                                                                                                                                                                                                                                                                                                                                                                                                                                                                                                                                                                                                                                                                                                 |
| 94  | F <sub>6</sub> Li <sub>2</sub> Mo,                                                                                                                                                                                                                                                                                                                                                                                                                                                                                                                                                                                                                                                                                                                                                                                                                                                                                                                                                                                                                                                                                                                                                                                                                                                                                                                                                                                                                                                                                                                                                                                     |
| 96  | Ag <sub>2</sub> HgO <sub>2</sub> , AuF <sub>22</sub> Sb <sub>4</sub> Xe <sub>4</sub> , B <sub>6</sub> Be, Ba <sub>3</sub> Sn <sub>2</sub> , CdP <sub>2</sub> , Ge, Na <sub>2</sub> O <sub>3</sub> Zn <sub>2</sub> , O <sub>2</sub> Te, P <sub>2</sub> Zn,                                                                                                                                                                                                                                                                                                                                                                                                                                                                                                                                                                                                                                                                                                                                                                                                                                                                                                                                                                                                                                                                                                                                                                                                                                                                                                                                                              |
| 97  | Ca <sub>2</sub> O <sub>20</sub> Si <sub>8</sub> Th,                                                                                                                                                                                                                                                                                                                                                                                                                                                                                                                                                                                                                                                                                                                                                                                                                                                                                                                                                                                                                                                                                                                                                                                                                                                                                                                                                                                                                                                                                                                                                                    |
| 98  | As <sub>2</sub> Cd, O <sub>2</sub> Si,                                                                                                                                                                                                                                                                                                                                                                                                                                                                                                                                                                                                                                                                                                                                                                                                                                                                                                                                                                                                                                                                                                                                                                                                                                                                                                                                                                                                                                                                                                                                                                                 |
| 99  | BaO <sub>3</sub> Ti, Bi <sub>2</sub> O <sub>6</sub> TiZn, Br <sub>3</sub> CsPb, Cl <sub>3</sub> CsPb, HfO <sub>3</sub> Sr, O <sub>3</sub> PbTi, O <sub>3</sub> SrZr,                                                                                                                                                                                                                                                                                                                                                                                                                                                                                                                                                                                                                                                                                                                                                                                                                                                                                                                                                                                                                                                                                                                                                                                                                                                                                                                                                                                                                                                   |
| 100 | Ba <sub>2</sub> NaNb <sub>5</sub> O <sub>15</sub> , Ba <sub>2</sub> O <sub>8</sub> Si <sub>2</sub> Ti, K <sub>2</sub> Nb <sub>2</sub> O <sub>14</sub> Si <sub>4</sub> , La <sub>3</sub> N <sub>11</sub> Si <sub>6</sub> , O <sub>8</sub> Si <sub>2</sub> Sr <sub>2</sub> Ti,                                                                                                                                                                                                                                                                                                                                                                                                                                                                                                                                                                                                                                                                                                                                                                                                                                                                                                                                                                                                                                                                                                                                                                                                                                                                                                                                           |
| 102 | Al <sub>2</sub> Y <sub>3</sub> , Ca <sub>3</sub> Cd <sub>2</sub> , Cs <sub>2</sub> Hg <sub>6</sub> S <sub>7</sub> , K <sub>2</sub> O <sub>7</sub> Zn <sub>6</sub> , N <sub>2</sub> S <sub>4</sub> ,                                                                                                                                                                                                                                                                                                                                                                                                                                                                                                                                                                                                                                                                                                                                                                                                                                                                                                                                                                                                                                                                                                                                                                                                                                                                                                                                                                                                                    |
| 104 | HgI <sub>6</sub> Tl <sub>4</sub> ,                                                                                                                                                                                                                                                                                                                                                                                                                                                                                                                                                                                                                                                                                                                                                                                                                                                                                                                                                                                                                                                                                                                                                                                                                                                                                                                                                                                                                                                                                                                                                                                     |
| 105 | AlPS <sub>4</sub> , As <sub>2</sub> BaGe <sub>2</sub> , BaGe <sub>2</sub> P <sub>2</sub> ,                                                                                                                                                                                                                                                                                                                                                                                                                                                                                                                                                                                                                                                                                                                                                                                                                                                                                                                                                                                                                                                                                                                                                                                                                                                                                                                                                                                                                                                                                                                             |
| 107 | BaGe <sub>3</sub> Pt, BaPdSi <sub>3</sub> , BaPdSn <sub>3</sub> , BaPtSi <sub>3</sub> , BaPtSn <sub>3</sub> , Br <sub>8</sub> S <sub>9</sub> Ta <sub>4</sub> , CBaSi, CaPtSi <sub>3</sub> , Ca <sub>2</sub> Sb, Ge <sub>3</sub> PdSr, Ge <sub>3</sub> PtSr, Na <sub>6</sub> O <sub>5</sub> Pb, P <sub>2</sub> U, PdSn <sub>3</sub> Sr,                                                                                                                                                                                                                                                                                                                                                                                                                                                                                                                                                                                                                                                                                                                                                                                                                                                                                                                                                                                                                                                                                                                                                                                                                                                                                 |
| 108 | Al <sub>3</sub> F <sub>19</sub> Pb <sub>5</sub> , ClF <sub>4</sub> NO, K <sub>2</sub> SnTe <sub>5</sub> , Rb <sub>2</sub> SnTe <sub>5</sub> , Si <sub>3</sub> Sr <sub>5</sub> ,                                                                                                                                                                                                                                                                                                                                                                                                                                                                                                                                                                                                                                                                                                                                                                                                                                                                                                                                                                                                                                                                                                                                                                                                                                                                                                                                                                                                                                        |
| 109 | AlGeLa, AsNb, AsTa, Ba <sub>2</sub> S <sub>3</sub> , Ga <sub>2</sub> S <sub>2</sub> Te, Ga <sub>2</sub> Se <sub>2</sub> Te, Li <sub>8</sub> N <sub>2</sub> Se, Li <sub>8</sub> N <sub>2</sub> Te, NbP, PTa,                                                                                                                                                                                                                                                                                                                                                                                                                                                                                                                                                                                                                                                                                                                                                                                                                                                                                                                                                                                                                                                                                                                                                                                                                                                                                                                                                                                                            |
| 110 | As <sub>2</sub> Zn <sub>3</sub> ,                                                                                                                                                                                                                                                                                                                                                                                                                                                                                                                                                                                                                                                                                                                                                                                                                                                                                                                                                                                                                                                                                                                                                                                                                                                                                                                                                                                                                                                                                                                                                                                      |
| 111 | AgIn <sub>5</sub> Se <sub>8</sub> , AgIn <sub>5</sub> Te <sub>8</sub> , Ag <sub>2</sub> HgI <sub>4</sub> , As <sub>4</sub> Ge <sub>3</sub> , As <sub>4</sub> Si <sub>3</sub> , As <sub>4</sub> Sn <sub>3</sub> , C <sub>11</sub> N <sub>4</sub> , C <sub>3</sub> As <sub>4</sub> , C <sub>3</sub> N <sub>4</sub> , CdIn <sub>2</sub> Se <sub>4</sub> , F <sub>6</sub> KSb, Ga <sub>2</sub> S <sub>4</sub> Zn,                                                                                                                                                                                                                                                                                                                                                                                                                                                                                                                                                                                                                                                                                                                                                                                                                                                                                                                                                                                                                                                                                                                                                                                                          |
| 112 | AlPS <sub>4</sub> ,                                                                                                                                                                                                                                                                                                                                                                                                                                                                                                                                                                                                                                                                                                                                                                                                                                                                                                                                                                                                                                                                                                                                                                                                                                                                                                                                                                                                                                                                                                                                                                                                    |
| 113 | AgTe <sub>2</sub> Y, B <sub>2</sub> Ca <sub>2</sub> O <sub>7</sub> Si, BaS <sub>3</sub> , BaSe <sub>3</sub> , BaTe <sub>3</sub> , Ba <sub>2</sub> Ge <sub>2</sub> MgO <sub>7</sub> , Ba <sub>2</sub> Ge <sub>2</sub> OS <sub>6</sub> Zn, Ba <sub>2</sub> Ge <sub>2</sub> O <sub>7</sub> Zn, Ba <sub>2</sub> MgO <sub>7</sub> Si <sub>2</sub> , BeCa <sub>2</sub> O <sub>7</sub> Si <sub>2</sub> , Be <sub>2</sub> F <sub>7</sub> LiNa <sub>2</sub> , Be <sub>2</sub> GeLa <sub>2</sub> O <sub>7</sub> , Be <sub>2</sub> GeO <sub>7</sub> Y <sub>2</sub> , Be <sub>2</sub> O <sub>7</sub> SiY <sub>2</sub> , Br <sub>3</sub> NbO, CN <sub>2</sub> , Ca <sub>2</sub> MgO <sub>7</sub> Si <sub>2</sub> , Ca <sub>2</sub> O <sub>7</sub> Si <sub>2</sub> Zn, CdMoO <sub>6</sub> Te, Cl <sub>3</sub> NbO, Cl <sub>6</sub> IP, Cs <sub>2</sub> O <sub>16</sub> S <sub>3</sub> U <sub>2</sub> ,                                                                                                                                                                                                                                                                                                                                                                                                                                                                                                                                                                                                                                                                                                                               |

Part 13 of all the predicted materials with band crossings from **Cases 1** or **2**:

|     |                                                                                                                                                                                                                                                                                                                                                                                                                                                                                                                                                                                                                                                                                                                                                                                                                                                                                                                                                                                                                                                                                                                                                                                                                                                                                                                                                                                                                                                                                                                                                                                                                                                                                                             |
|-----|-------------------------------------------------------------------------------------------------------------------------------------------------------------------------------------------------------------------------------------------------------------------------------------------------------------------------------------------------------------------------------------------------------------------------------------------------------------------------------------------------------------------------------------------------------------------------------------------------------------------------------------------------------------------------------------------------------------------------------------------------------------------------------------------------------------------------------------------------------------------------------------------------------------------------------------------------------------------------------------------------------------------------------------------------------------------------------------------------------------------------------------------------------------------------------------------------------------------------------------------------------------------------------------------------------------------------------------------------------------------------------------------------------------------------------------------------------------------------------------------------------------------------------------------------------------------------------------------------------------------------------------------------------------------------------------------------------------|
| 113 | GaNb <sub>4</sub> S <sub>8</sub> , Ga <sub>2</sub> La <sub>2</sub> OS <sub>6</sub> Zn, LiNbO <sub>6</sub> W, Li <sub>6</sub> O <sub>7</sub> Si <sub>2</sub> , MgO <sub>7</sub> Si <sub>2</sub> Sr <sub>2</sub> , Mo <sub>3</sub> O <sub>12</sub> Y <sub>2</sub> , N <sub>4</sub> O <sub>3</sub> Si <sub>3</sub> Y <sub>2</sub> , O <sub>3</sub> W, O <sub>7</sub> Si <sub>2</sub> Sr <sub>2</sub> Zn,                                                                                                                                                                                                                                                                                                                                                                                                                                                                                                                                                                                                                                                                                                                                                                                                                                                                                                                                                                                                                                                                                                                                                                                                                                                                                                       |
| 114 | Ba <sub>4</sub> Ga <sub>4</sub> Se <sub>12</sub> Sn, Ba <sub>4</sub> Ga <sub>5</sub> LiSe <sub>12</sub> , Bi <sub>2</sub> O <sub>3</sub> , C <sub>19</sub> Sc <sub>15</sub> , C <sub>19</sub> Y <sub>15</sub> , C <sub>32</sub> In <sub>4</sub> O <sub>32</sub> Re <sub>8</sub> , Ga <sub>4</sub> GePb <sub>4</sub> Se <sub>12</sub> , INb <sub>3</sub> Se <sub>12</sub> , Na <sub>3</sub> PS <sub>4</sub> , Na <sub>4</sub> S <sub>4</sub> Sn, Na <sub>4</sub> Se <sub>4</sub> Sn, O <sub>12</sub> Se <sub>4</sub> , O <sub>5</sub> SSn <sub>2</sub> , Pd <sub>4</sub> S, Pd <sub>4</sub> Se,                                                                                                                                                                                                                                                                                                                                                                                                                                                                                                                                                                                                                                                                                                                                                                                                                                                                                                                                                                                                                                                                                                              |
| 115 | Bi <sub>2</sub> O <sub>3</sub> , Cl <sub>2</sub> Mg, CsI <sub>3</sub> Li <sub>2</sub> , F <sub>2</sub> OPb <sub>2</sub> , GaHf <sub>2</sub> Sb <sub>3</sub> , Li <sub>3</sub> N <sub>2</sub> Na <sub>3</sub> ,                                                                                                                                                                                                                                                                                                                                                                                                                                                                                                                                                                                                                                                                                                                                                                                                                                                                                                                                                                                                                                                                                                                                                                                                                                                                                                                                                                                                                                                                                              |
| 116 | BiF <sub>6</sub> K, F <sub>6</sub> KNb, F <sub>6</sub> Pb <sub>2</sub> , Ge <sub>7</sub> Re <sub>4</sub> , O <sub>2</sub> Si,                                                                                                                                                                                                                                                                                                                                                                                                                                                                                                                                                                                                                                                                                                                                                                                                                                                                                                                                                                                                                                                                                                                                                                                                                                                                                                                                                                                                                                                                                                                                                                               |
| 117 | AuBi <sub>2</sub> NaO <sub>5</sub> , Ca <sub>2</sub> Ge <sub>7</sub> O <sub>16</sub> , Cd <sub>2</sub> Ge <sub>7</sub> O <sub>16</sub> , O <sub>4</sub> Pb <sub>3</sub> , PdRb <sub>2</sub> Se <sub>16</sub> ,                                                                                                                                                                                                                                                                                                                                                                                                                                                                                                                                                                                                                                                                                                                                                                                                                                                                                                                                                                                                                                                                                                                                                                                                                                                                                                                                                                                                                                                                                              |
| 118 | B, CB <sub>24</sub> Mg <sub>2</sub> , O <sub>2</sub> Si, O <sub>6</sub> Sb <sub>2</sub> Zn, P <sub>2</sub> S <sub>8</sub> Zn <sub>3</sub> ,                                                                                                                                                                                                                                                                                                                                                                                                                                                                                                                                                                                                                                                                                                                                                                                                                                                                                                                                                                                                                                                                                                                                                                                                                                                                                                                                                                                                                                                                                                                                                                 |
| 120 | AgAsF <sub>10</sub> Xe <sub>2</sub> , AgMgSb, AlCsF <sub>4</sub> , AlF <sub>4</sub> Rb, Br <sub>13</sub> Cd <sub>3</sub> Cs <sub>7</sub> , O <sub>2</sub> Si, O <sub>6</sub> P <sub>4</sub> S <sub>4</sub> ,                                                                                                                                                                                                                                                                                                                                                                                                                                                                                                                                                                                                                                                                                                                                                                                                                                                                                                                                                                                                                                                                                                                                                                                                                                                                                                                                                                                                                                                                                                |
| 121 | AgClO <sub>4</sub> , Ag <sub>2</sub> BaGeS <sub>4</sub> , Ag <sub>2</sub> CdI <sub>4</sub> , Ag <sub>2</sub> KPS <sub>4</sub> , Ag <sub>2</sub> KS <sub>4</sub> Sb, Ag <sub>2</sub> S <sub>4</sub> SnZn, AsHgS <sub>3</sub> Tl, As <sub>22</sub> Ba <sub>13</sub> Si <sub>6</sub> Sn <sub>8</sub> , AuPb <sub>3</sub> , CK <sub>4</sub> O <sub>4</sub> , CLi <sub>4</sub> O <sub>4</sub> , CN <sub>4</sub> O <sub>4</sub> , CaGeLi <sub>2</sub> O <sub>4</sub> , CaLi <sub>2</sub> O <sub>4</sub> Si, CdGeTe <sub>4</sub> Tl <sub>2</sub> , CdIn <sub>2</sub> Se <sub>4</sub> , CdK <sub>2</sub> Se <sub>4</sub> Sn, CdSnTe <sub>4</sub> Tl <sub>2</sub> , ClCsF <sub>3</sub> Sb, F <sub>9</sub> NaTh <sub>2</sub> , GeHgTe <sub>4</sub> Tl <sub>2</sub> , GeLi <sub>2</sub> PbS <sub>4</sub> , GeO <sub>8</sub> Zr <sub>3</sub> , HgK <sub>2</sub> Se <sub>4</sub> Sn, HgRb <sub>2</sub> SnTe <sub>4</sub> , HgSe <sub>4</sub> SiTl <sub>2</sub> , HgSnTe <sub>4</sub> Tl <sub>2</sub> , Mo <sub>3</sub> P, NbO <sub>8</sub> Rb <sub>3</sub> , O <sub>2</sub> Si, O <sub>8</sub> Rb <sub>3</sub> Ta,                                                                                                                                                                                                                                                                                                                                                                                                                                                                                                                                                                                                       |
| 122 | AgAlS <sub>2</sub> , AgAlSe <sub>2</sub> , AgAlTe <sub>2</sub> , AgGaS <sub>2</sub> , AgGaSe <sub>2</sub> , AgGaTe <sub>2</sub> , AgInS <sub>2</sub> , AgInSe <sub>2</sub> , AgInTe <sub>2</sub> , AlLiTe <sub>2</sub> , As <sub>2</sub> BeSi, As <sub>2</sub> CdGe, As <sub>2</sub> CdSi, As <sub>2</sub> CdSn, As <sub>2</sub> GeMg, As <sub>2</sub> GeZn, As <sub>2</sub> MgSi, As <sub>2</sub> SiZn, As <sub>2</sub> SnZn, As <sub>3</sub> Mg <sub>4</sub> NaO <sub>12</sub> , BLiO <sub>2</sub> , B <sub>2</sub> O <sub>4</sub> Pd, B <sub>6</sub> CsLiO <sub>10</sub> , BeN <sub>2</sub> Si, BeP <sub>2</sub> Si, BeSb <sub>2</sub> Si, CBeN <sub>2</sub> , CKN <sub>3</sub> O <sub>6</sub> , CMgN <sub>2</sub> , CN <sub>2</sub> , CN <sub>2</sub> Zn, CO <sub>2</sub> , C <sub>2</sub> HgN <sub>2</sub> , C <sub>3</sub> N <sub>3</sub> P, CaGeN <sub>2</sub> , CdGeP <sub>2</sub> , CdP <sub>2</sub> Si, CdP <sub>2</sub> Sn, CdSb <sub>2</sub> Sn, CdTe <sub>2</sub> Zn, Cl <sub>10</sub> N <sub>2</sub> S <sub>2</sub> Sb <sub>2</sub> , Cl <sub>2</sub> Zn, F <sub>4</sub> OU, F <sub>5</sub> U, GaLiO <sub>6</sub> Se <sub>2</sub> , GaLiTe <sub>2</sub> , GeMgP <sub>2</sub> , GeP <sub>2</sub> Zn, GeS <sub>2</sub> , GeSe <sub>2</sub> , HgP <sub>2</sub> Si, I <sub>2</sub> P <sub>4</sub> Se <sub>3</sub> , InLiSe <sub>2</sub> , InLiTe <sub>2</sub> , LiN <sub>2</sub> P, MgN <sub>2</sub> Si, MgP <sub>2</sub> Si, MgSb <sub>2</sub> Si, N <sub>2</sub> NaP, Na <sub>2</sub> S <sub>4</sub> , Na <sub>2</sub> Se <sub>4</sub> , O <sub>2</sub> Si, O <sub>4</sub> SiZn <sub>2</sub> , P <sub>2</sub> SiZn, P <sub>2</sub> SnZn, S <sub>2</sub> Si, Sb <sub>18</sub> Zr <sub>11</sub> , |
| 123 | AgPPd <sub>5</sub> , AgSbTe <sub>2</sub> , AlF <sub>4</sub> K, AlF <sub>4</sub> Na, AlF <sub>4</sub> Rb, AlF <sub>4</sub> Tl, AlF <sub>5</sub> K <sub>2</sub> , As <sub>2</sub> BaOTi <sub>2</sub> , As <sub>3</sub> Cd <sub>4</sub> Cs, As <sub>3</sub> CsZn <sub>4</sub> , As <sub>3</sub> RbZn <sub>4</sub> , BCa <sub>3</sub> N <sub>3</sub> , Ba, BaGe <sub>3</sub> Mg <sub>4</sub> , BaMg <sub>4</sub> Si <sub>3</sub> , BaOSb <sub>2</sub> Ti <sub>2</sub> , BaO <sub>3</sub> Ti, Ba <sub>3</sub> N <sub>2</sub> OZn, BiLi, BiNa, Bi <sub>2</sub> ClLuO <sub>4</sub> , Bi <sub>2</sub> ILaO <sub>4</sub> , Bi <sub>4</sub> ClO <sub>8</sub> Ta, Br <sub>4</sub> K <sub>2</sub> Pd, Br <sub>4</sub> K <sub>2</sub> Pt, CPd <sub>3</sub> Sn, C <sub>2</sub> AgK, C <sub>2</sub> AuNa, CaF <sub>2</sub> , Ca <sub>2</sub> O <sub>10</sub> RbTa <sub>3</sub> , CdHg <sub>2</sub> Ti, ClNa <sub>3</sub> , Cl <sub>4</sub> Cs <sub>2</sub> Pd, Cl <sub>4</sub> K <sub>2</sub> Pd, Cl <sub>4</sub> K <sub>2</sub> Pt, Cl <sub>4</sub> PdTi <sub>2</sub> , CsI, CsNb <sub>3</sub> O <sub>10</sub> Sr <sub>2</sub> , CsO <sub>10</sub> Sr <sub>2</sub> Ta <sub>3</sub> , HgTi, HgZr, LaO <sub>7</sub> RbTa <sub>2</sub> , Li <sub>5</sub> N <sub>2</sub> Na, MgPt <sub>3</sub> , MoPt <sub>3</sub> , N <sub>3</sub> Rb, NaNbO <sub>3</sub> , NaO <sub>3</sub> Ta, Nb <sub>3</sub> O <sub>10</sub> RbSr <sub>2</sub> , O <sub>3</sub> PbTi, P <sub>3</sub> RbZn <sub>4</sub> , Pb <sub>3</sub> Sr, Pd <sub>3</sub> Sn, Pt <sub>5</sub> SiSn,                                                                                                                                                                   |
| 124 | Au <sub>2</sub> CdF <sub>8</sub> , Au <sub>2</sub> F <sub>8</sub> Hg, I <sub>3</sub> Nb <sub>10</sub> Se <sub>40</sub> ,                                                                                                                                                                                                                                                                                                                                                                                                                                                                                                                                                                                                                                                                                                                                                                                                                                                                                                                                                                                                                                                                                                                                                                                                                                                                                                                                                                                                                                                                                                                                                                                    |
| 125 | AgK <sub>3</sub> Se <sub>8</sub> Sn <sub>3</sub> , AgRb <sub>3</sub> Se <sub>8</sub> Sn <sub>3</sub> , Ag <sub>2</sub> BaHg <sub>2</sub> O <sub>4</sub> , Al <sub>2</sub> BaTe <sub>4</sub> , As <sub>4</sub> CaNa <sub>2</sub> O <sub>12</sub> , K <sub>3</sub> NaSe <sub>8</sub> Sn <sub>3</sub> , O <sub>2</sub> Si, Pb <sub>4</sub> Pt,                                                                                                                                                                                                                                                                                                                                                                                                                                                                                                                                                                                                                                                                                                                                                                                                                                                                                                                                                                                                                                                                                                                                                                                                                                                                                                                                                                 |
| 126 | Al <sub>4</sub> Bi <sub>2</sub> S <sub>8</sub> , Al <sub>4</sub> Bi <sub>2</sub> Se <sub>8</sub> , Bi <sub>2</sub> Ga <sub>4</sub> S <sub>8</sub> , Bi <sub>2</sub> Ga <sub>4</sub> Se <sub>8</sub> , K <sub>8</sub> Tl <sub>10</sub> Zn, LaMo <sub>2</sub> O <sub>8</sub> Rb,                                                                                                                                                                                                                                                                                                                                                                                                                                                                                                                                                                                                                                                                                                                                                                                                                                                                                                                                                                                                                                                                                                                                                                                                                                                                                                                                                                                                                              |
| 127 | AlF <sub>3</sub> , AlF <sub>4</sub> K, AlF <sub>4</sub> Rb, AlPt <sub>3</sub> , AuBi <sub>5</sub> Na <sub>2</sub> O <sub>11</sub> , B <sub>4</sub> Ca, B <sub>4</sub> La, B <sub>4</sub> Lu, B <sub>4</sub> U, B <sub>4</sub> Y, BaCl <sub>2</sub> Hg <sub>2</sub> O <sub>2</sub> , BaLa <sub>2</sub> O <sub>5</sub> Pd, BaLa <sub>2</sub> O <sub>5</sub> Pt, BaO <sub>5</sub> PdY <sub>2</sub> , Ba <sub>3</sub> F <sub>12</sub> In <sub>2</sub> , Ba <sub>4</sub> In <sub>2</sub> S <sub>5</sub> Te <sub>2</sub> , Ba <sub>4</sub> In <sub>2</sub> Se <sub>5</sub> Te <sub>2</sub> , CB <sub>2</sub> Lu, CaO <sub>3</sub> Si, Ca <sub>2</sub> Ge <sub>2</sub> Sn, CdGe <sub>2</sub> Y <sub>2</sub> , CsF <sub>5</sub> K <sub>2</sub> Pd, CsF <sub>7</sub> Rb <sub>2</sub> Si, CsI <sub>3</sub> Sn, Cs <sub>3</sub> F <sub>7</sub> Ge, Cs <sub>3</sub> F <sub>7</sub> Si, Cs <sub>3</sub> F <sub>7</sub> Ti, F <sub>3</sub> MgNa, F <sub>5</sub> K <sub>2</sub> PdRb, F <sub>5</sub> PdRb <sub>3</sub> , F <sub>7</sub> K <sub>3</sub> Si, F <sub>7</sub> Rb <sub>3</sub> Si, F <sub>7</sub> Rb <sub>3</sub> Ti, GaPt <sub>3</sub> , GeTe <sub>5</sub> Tl <sub>2</sub> , HfO <sub>3</sub> Sr, Hf <sub>3</sub> In <sub>4</sub> , Hg <sub>2</sub> I <sub>2</sub> PbS <sub>2</sub> , In <sub>4</sub> Ti <sub>3</sub> , K <sub>2</sub> LaNb <sub>5</sub> O <sub>15</sub> , K <sub>2</sub> LaO <sub>15</sub> Ta <sub>5</sub> , K <sub>3</sub> Li <sub>2</sub> Nb <sub>5</sub> O <sub>15</sub> , Li <sub>2</sub> Sn <sub>5</sub> , NaO <sub>3</sub> Ta, O <sub>3</sub> SrZr, Pb <sub>3</sub> Sr <sub>2</sub> , Pt <sub>3</sub> Si, Si <sub>2</sub> Th <sub>3</sub> , Si <sub>2</sub> U <sub>3</sub> ,            |

Part 14 of all the predicted materials with band crossings from **Cases 1** or **2**:

|            |                                                                                                                                                                                                                                                                                                                                                                                                                                                                                                                                                                                                                                                                                                                                                                                                                                                                                                                                                                                                                                                                                                                                                                                                                                                                                                                                                                                                                                                                                                                                                                                                                                                                                                                                                                                                                                                                                                                                                                                                                                                                                                                                                                                                                                                                                                                                                                                                                                                                                                                                                                                                                                                                                                                                                                                                                                      |
|------------|--------------------------------------------------------------------------------------------------------------------------------------------------------------------------------------------------------------------------------------------------------------------------------------------------------------------------------------------------------------------------------------------------------------------------------------------------------------------------------------------------------------------------------------------------------------------------------------------------------------------------------------------------------------------------------------------------------------------------------------------------------------------------------------------------------------------------------------------------------------------------------------------------------------------------------------------------------------------------------------------------------------------------------------------------------------------------------------------------------------------------------------------------------------------------------------------------------------------------------------------------------------------------------------------------------------------------------------------------------------------------------------------------------------------------------------------------------------------------------------------------------------------------------------------------------------------------------------------------------------------------------------------------------------------------------------------------------------------------------------------------------------------------------------------------------------------------------------------------------------------------------------------------------------------------------------------------------------------------------------------------------------------------------------------------------------------------------------------------------------------------------------------------------------------------------------------------------------------------------------------------------------------------------------------------------------------------------------------------------------------------------------------------------------------------------------------------------------------------------------------------------------------------------------------------------------------------------------------------------------------------------------------------------------------------------------------------------------------------------------------------------------------------------------------------------------------------------------|
| <b>128</b> | Al <sub>3</sub> F <sub>14</sub> Na <sub>5</sub> , Br <sub>4</sub> STl <sub>6</sub> , Br <sub>6</sub> HgTl <sub>4</sub> , Br <sub>6</sub> In <sub>2</sub> Zr, Br <sub>6</sub> K <sub>2</sub> Te, Br <sub>6</sub> Rb <sub>2</sub> U, Br <sub>6</sub> TeTl <sub>2</sub> , CdI <sub>6</sub> In <sub>4</sub> , CdI <sub>6</sub> Tl <sub>4</sub> , Cl <sub>4</sub> STl <sub>6</sub> , Cl <sub>6</sub> K <sub>2</sub> Sn, F <sub>14</sub> In <sub>3</sub> K <sub>5</sub> , F <sub>6</sub> HfK <sub>2</sub> , HgI <sub>6</sub> Tl <sub>4</sub> , InB <sub>3</sub> Se <sub>12</sub> , I <sub>4</sub> STl <sub>6</sub> , I <sub>4</sub> SeTl <sub>6</sub> , I <sub>6</sub> K <sub>2</sub> Pt, I <sub>6</sub> Rb <sub>2</sub> Te,                                                                                                                                                                                                                                                                                                                                                                                                                                                                                                                                                                                                                                                                                                                                                                                                                                                                                                                                                                                                                                                                                                                                                                                                                                                                                                                                                                                                                                                                                                                                                                                                                                                                                                                                                                                                                                                                                                                                                                                                                                                                                                               |
| <b>129</b> | AcBrO, AcClO, AgAsOTh, AgBaFS, AgBaFSe, AgBaFTe, AgBrOPb, AgBr <sub>2</sub> Cs, AgCl <sub>2</sub> Cs, AgFSSr, AgFSeSr, AgFSrTe, AgKSe, AgLaOS, AgLaO <sub>4</sub> Ti, AgLaSb <sub>2</sub> , AgOPTh, AgSb <sub>2</sub> Y, AlBaFGe, AlF <sub>3</sub> , AlGeNa, AlNaSi, Al <sub>2</sub> Au <sub>2</sub> Sr, Al <sub>2</sub> Au <sub>2</sub> Th, AsBaFZn, AsBeLi, AsCaRb, AsCdK, AsFSrZn, AsGeNb, AsKMg, AsLaOZn, AsMgNa, AsNaZn, AsPU, As <sub>2</sub> PdU, As <sub>2</sub> U, AuLaSb <sub>2</sub> , Au <sub>2</sub> Ga <sub>2</sub> Sr, Au <sub>2</sub> Sn <sub>2</sub> Sr, BaF <sub>4</sub> Sn, BaGeMg, BaHfN <sub>2</sub> , BaMgPb, BaMgSn, BaMg <sub>2</sub> Pb <sub>2</sub> , BaMg <sub>2</sub> Sn <sub>2</sub> , BaN <sub>2</sub> Zr, BaO, BaPd <sub>2</sub> Sb <sub>2</sub> , BaSn <sub>2</sub> Zn <sub>2</sub> , Ba <sub>2</sub> BrInO <sub>3</sub> , Ba <sub>2</sub> Br <sub>2</sub> F <sub>10</sub> Pb <sub>4</sub> , Ba <sub>2</sub> ClInO <sub>3</sub> , Ba <sub>2</sub> F <sub>10</sub> I <sub>2</sub> Pb <sub>4</sub> , Ba <sub>2</sub> FInO <sub>3</sub> , Ba <sub>2</sub> OTe, BeLiP, Be <sub>2</sub> CaGe <sub>2</sub> , BiBrO, BiCaK, BiClO, BiFO, BiIO, BiIO <sub>3</sub> Te, BiLaOS <sub>2</sub> , BiLaOSE <sub>2</sub> , BiLiO <sub>4</sub> Pd <sub>2</sub> , Bi <sub>2</sub> LaLi, Bi <sub>2</sub> OS <sub>2</sub> , Bi <sub>2</sub> Pd <sub>2</sub> Sr, BrFPb, BrLaO, BrLuO, BrNTh, BrNU, Br <sub>2</sub> CsLi, CaClF, CaGaN, CaGa <sub>4</sub> , CaRbSb, CdHf, CdKsB, CdTi, CdZr, Cd <sub>3</sub> O <sub>5</sub> Si, ClFPb, ClLaO, ClLaTe, ClNTh, ClNU, ClOY, Cl <sub>2</sub> CsLi, CsF <sub>4</sub> Ti, CsNaS, CsNaSe, CsNaTe, FIPb, FLaO, FLaS, FOY, FSy, FTl, F <sub>4</sub> KMoNaO <sub>2</sub> , F <sub>4</sub> KNaO <sub>2</sub> W, F <sub>4</sub> PbSn, F <sub>5</sub> KNaNbO, GeHfS, GeHfSe, GeHfTe, GeLi <sub>2</sub> O <sub>5</sub> Ti, GeNa <sub>2</sub> O <sub>5</sub> Ti, GeNbSb, GeSU, GeSZr, GeSeZr, Ge <sub>2</sub> Pt <sub>2</sub> Th, Ge <sub>2</sub> Pt <sub>2</sub> U, HfSi, HfSb <sub>2</sub> , HfSeSi, HfSiTe, ILaO, ILuO, INTh, INU, In <sub>9</sub> Li <sub>2</sub> Y <sub>5</sub> , KLaNaNbO <sub>5</sub> , KLaNaO <sub>5</sub> Ta, KLaO <sub>4</sub> Ti, KLIS, KLiSe, KLiTe, KMgP, KMgSb, KNaO, LaLiO <sub>4</sub> Ti, LaN, LaNaO <sub>4</sub> Ti, LaOPZn, LaOSbZn, LaSbTe, LiNaS, LiRbS, LiRbSe, Li <sub>2</sub> N <sub>2</sub> Na <sub>4</sub> , Li <sub>2</sub> O <sub>5</sub> SiTi, MgNaSb, N <sub>2</sub> SrTi, NaORb, NaPZn, NaRbS, NaSbZn, Na <sub>2</sub> O <sub>5</sub> SiTi, OPb, OSTh, OSU, OSeTh, OSeU, OSiZr, OSn, OTeTh, OTeU, O <sub>3</sub> W, P <sub>2</sub> U, PdSb <sub>2</sub> U, Pd <sub>2</sub> Sb <sub>2</sub> Sr, Pt <sub>2</sub> Si <sub>2</sub> Th, SSiU, SSiZr, SZr, Sb <sub>2</sub> U, Sc, SeSiZr, SeTa <sub>2</sub> , SeTi, SeZn, SiTeZr, SnTeU, SnTeZr, |
| <b>130</b> | Ba <sub>5</sub> Ge <sub>3</sub> , Ba <sub>5</sub> Si <sub>3</sub> , Bi <sub>2</sub> O <sub>4</sub> Pd, Ca <sub>5</sub> Ge <sub>3</sub> , ClSe <sub>2</sub> Tl <sub>5</sub> , Cl <sub>4</sub> Na <sub>2</sub> Pd, Ga <sub>3</sub> Y <sub>5</sub> , IK <sub>3</sub> O <sub>5</sub> , O <sub>3</sub> W, O <sub>5</sub> SiSr <sub>3</sub> , PbSe <sub>3</sub> Tl <sub>4</sub> , S <sub>3</sub> SnTl <sub>4</sub> ,                                                                                                                                                                                                                                                                                                                                                                                                                                                                                                                                                                                                                                                                                                                                                                                                                                                                                                                                                                                                                                                                                                                                                                                                                                                                                                                                                                                                                                                                                                                                                                                                                                                                                                                                                                                                                                                                                                                                                                                                                                                                                                                                                                                                                                                                                                                                                                                                                       |
| <b>131</b> | C <sub>2</sub> Th, CaO <sub>4</sub> Pt <sub>2</sub> , F <sub>6</sub> PbSr, IPdTe, LiNSr,                                                                                                                                                                                                                                                                                                                                                                                                                                                                                                                                                                                                                                                                                                                                                                                                                                                                                                                                                                                                                                                                                                                                                                                                                                                                                                                                                                                                                                                                                                                                                                                                                                                                                                                                                                                                                                                                                                                                                                                                                                                                                                                                                                                                                                                                                                                                                                                                                                                                                                                                                                                                                                                                                                                                             |
| <b>132</b> | AgF <sub>6</sub> Ta, Ag <sub>2</sub> Cs <sub>2</sub> S <sub>4</sub> Ti,                                                                                                                                                                                                                                                                                                                                                                                                                                                                                                                                                                                                                                                                                                                                                                                                                                                                                                                                                                                                                                                                                                                                                                                                                                                                                                                                                                                                                                                                                                                                                                                                                                                                                                                                                                                                                                                                                                                                                                                                                                                                                                                                                                                                                                                                                                                                                                                                                                                                                                                                                                                                                                                                                                                                                              |
| <b>133</b> | PTa <sub>3</sub> ,                                                                                                                                                                                                                                                                                                                                                                                                                                                                                                                                                                                                                                                                                                                                                                                                                                                                                                                                                                                                                                                                                                                                                                                                                                                                                                                                                                                                                                                                                                                                                                                                                                                                                                                                                                                                                                                                                                                                                                                                                                                                                                                                                                                                                                                                                                                                                                                                                                                                                                                                                                                                                                                                                                                                                                                                                   |
| <b>135</b> | CB <sub>2</sub> Lu, CB <sub>2</sub> Sc, Cs, O <sub>2</sub> Se, O <sub>4</sub> Pb <sub>3</sub> , O <sub>4</sub> Sb <sub>2</sub> Zn, PdSe,                                                                                                                                                                                                                                                                                                                                                                                                                                                                                                                                                                                                                                                                                                                                                                                                                                                                                                                                                                                                                                                                                                                                                                                                                                                                                                                                                                                                                                                                                                                                                                                                                                                                                                                                                                                                                                                                                                                                                                                                                                                                                                                                                                                                                                                                                                                                                                                                                                                                                                                                                                                                                                                                                             |
| <b>136</b> | Ag <sub>5</sub> CsSe <sub>3</sub> , Ag <sub>5</sub> CsTe <sub>3</sub> , Al <sub>2</sub> Hf <sub>3</sub> , Al <sub>2</sub> Lu <sub>3</sub> , Al <sub>2</sub> Y <sub>3</sub> , Al <sub>2</sub> Zr <sub>3</sub> , As <sub>2</sub> BrLa <sub>3</sub> O <sub>7</sub> , AuLi <sub>3</sub> O <sub>3</sub> , AuNa <sub>3</sub> O <sub>2</sub> , BLi <sub>3</sub> N <sub>2</sub> , BN, BaCd <sub>4</sub> Pt <sub>2</sub> , BaHg <sub>2</sub> Tl <sub>2</sub> , BaHg <sub>2</sub> Tl <sub>2</sub> , BaIn <sub>2</sub> La <sub>2</sub> O <sub>7</sub> , BaLa <sub>2</sub> O <sub>7</sub> Sc <sub>2</sub> , Ba <sub>3</sub> Ge <sub>4</sub> , Ba <sub>3</sub> S <sub>7</sub> Zr <sub>2</sub> , Ba <sub>3</sub> Si <sub>4</sub> , BeO, Be <sub>2</sub> K <sub>2</sub> Na <sub>4</sub> O <sub>5</sub> , BiLi <sub>3</sub> O <sub>4</sub> , Br <sub>2</sub> Ca, CO <sub>2</sub> , C <sub>2</sub> Mg, Ca <sub>10</sub> Mg <sub>2</sub> Sb <sub>9</sub> , CaCl <sub>2</sub> , Cd <sub>4</sub> Pt <sub>2</sub> Sr, Cl <sub>3</sub> NbO, Cl <sub>3</sub> OW, Cs <sub>2</sub> K <sub>2</sub> O <sub>5</sub> Te, F <sub>2</sub> Kr, F <sub>2</sub> Mg, F <sub>2</sub> Pd, F <sub>2</sub> Zn, F <sub>6</sub> GeLi <sub>2</sub> , F <sub>6</sub> Li <sub>2</sub> Mo, F <sub>6</sub> Li <sub>2</sub> Pd, F <sub>6</sub> Li <sub>2</sub> Pt, F <sub>6</sub> Na <sub>2</sub> Sn, Ga <sub>2</sub> O <sub>6</sub> Te, Ga <sub>3</sub> Re, Ga <sub>5</sub> Nb <sub>4</sub> , GeO <sub>2</sub> , Hg <sub>2</sub> Na <sub>3</sub> , I <sub>3</sub> OW, KPPdS <sub>4</sub> , LiO <sub>3</sub> RbZn <sub>2</sub> , Li <sub>2</sub> Sr <sub>3</sub> , MgO <sub>6</sub> Sb <sub>2</sub> , MgO <sub>6</sub> Ta <sub>2</sub> , MoO <sub>2</sub> , N <sub>2</sub> , O <sub>2</sub> Si, O <sub>2</sub> Sn, O <sub>2</sub> Ti, O <sub>2</sub> W, O <sub>6</sub> Sb <sub>2</sub> Zn,                                                                                                                                                                                                                                                                                                                                                                                                                                                                                                                                                                                                                                                                                                                                                                                                                                                                                                                                                                                          |

Part 15 of all the predicted materials with band crossings from **Cases 1** or **2**:

|     |                                                                                                                                                                                                                                                                                                                                                                                                                                                                                                                                                                                                                                                                                                                                                                                                                                                                                                                                                                                                                                                                                                                                                                                                                                                                                                                                                                                                                                                                                                                                                                                                                                                                                                                                                                                                                                                                                                                                                                                                                                                                                                                                                                                                                                                                                                                                                                                                                                                                                                                                                                                                                                                                                                                                                                                                                                                                                                                                                                                                                                                                                                                                                                                                                                                                                                                                                                                                                                                                                                                                                                                                                                                                                                                                                                                                                                                                                                                                                                                                                                                                                                                                                                                                                                                                                                                                                                                                                                                                                                                                                                                                                                                                                                                                                                                                                                                                                                                                                                                                                                                                                                                                                                                                                                                                                                                                                                                                                                                                                                                                                                   |
|-----|-------------------------------------------------------------------------------------------------------------------------------------------------------------------------------------------------------------------------------------------------------------------------------------------------------------------------------------------------------------------------------------------------------------------------------------------------------------------------------------------------------------------------------------------------------------------------------------------------------------------------------------------------------------------------------------------------------------------------------------------------------------------------------------------------------------------------------------------------------------------------------------------------------------------------------------------------------------------------------------------------------------------------------------------------------------------------------------------------------------------------------------------------------------------------------------------------------------------------------------------------------------------------------------------------------------------------------------------------------------------------------------------------------------------------------------------------------------------------------------------------------------------------------------------------------------------------------------------------------------------------------------------------------------------------------------------------------------------------------------------------------------------------------------------------------------------------------------------------------------------------------------------------------------------------------------------------------------------------------------------------------------------------------------------------------------------------------------------------------------------------------------------------------------------------------------------------------------------------------------------------------------------------------------------------------------------------------------------------------------------------------------------------------------------------------------------------------------------------------------------------------------------------------------------------------------------------------------------------------------------------------------------------------------------------------------------------------------------------------------------------------------------------------------------------------------------------------------------------------------------------------------------------------------------------------------------------------------------------------------------------------------------------------------------------------------------------------------------------------------------------------------------------------------------------------------------------------------------------------------------------------------------------------------------------------------------------------------------------------------------------------------------------------------------------------------------------------------------------------------------------------------------------------------------------------------------------------------------------------------------------------------------------------------------------------------------------------------------------------------------------------------------------------------------------------------------------------------------------------------------------------------------------------------------------------------------------------------------------------------------------------------------------------------------------------------------------------------------------------------------------------------------------------------------------------------------------------------------------------------------------------------------------------------------------------------------------------------------------------------------------------------------------------------------------------------------------------------------------------------------------------------------------------------------------------------------------------------------------------------------------------------------------------------------------------------------------------------------------------------------------------------------------------------------------------------------------------------------------------------------------------------------------------------------------------------------------------------------------------------------------------------------------------------------------------------------------------------------------------------------------------------------------------------------------------------------------------------------------------------------------------------------------------------------------------------------------------------------------------------------------------------------------------------------------------------------------------------------------------------------------------------------------------------------------------------------|
| 137 | As <sub>2</sub> Zn <sub>3</sub> , BLiSi <sub>2</sub> , B <sub>4</sub> Cl <sub>4</sub> , Ba <sub>2</sub> LiN, Ba <sub>2</sub> S <sub>6</sub> Th, Ba <sub>2</sub> S <sub>6</sub> U, CaO <sub>3</sub> Si, Cd <sub>4</sub> F <sub>6</sub> O, Cl <sub>2</sub> Zn, F <sub>2</sub> OPb <sub>2</sub> , GeSe <sub>2</sub> , HfO <sub>2</sub> , HgI <sub>2</sub> , Hg <sub>2</sub> I <sub>4</sub> , Li <sub>10</sub> O <sub>9</sub> Zn <sub>4</sub> , Li <sub>6</sub> MoN <sub>4</sub> , Li <sub>6</sub> N <sub>4</sub> W, Li <sub>6</sub> O <sub>4</sub> Zn, O <sub>2</sub> Zr, P <sub>2</sub> Zn <sub>3</sub> ,                                                                                                                                                                                                                                                                                                                                                                                                                                                                                                                                                                                                                                                                                                                                                                                                                                                                                                                                                                                                                                                                                                                                                                                                                                                                                                                                                                                                                                                                                                                                                                                                                                                                                                                                                                                                                                                                                                                                                                                                                                                                                                                                                                                                                                                                                                                                                                                                                                                                                                                                                                                                                                                                                                                                                                                                                                                                                                                                                                                                                                                                                                                                                                                                                                                                                                                                                                                                                                                                                                                                                                                                                                                                                                                                                                                                                                                                                                                                                                                                                                                                                                                                                                                                                                                                                                                                                                                                                                                                                                                                                                                                                                                                                                                                                                                                                                                                                                                                                           |
| 138 | AuBr, CLiO <sub>2</sub> , Cl <sub>2</sub> , Cl <sub>6</sub> Se <sub>4</sub> Zr, F <sub>6</sub> Pb <sub>2</sub> Zn, O <sub>4</sub> SnSr <sub>2</sub> ,                                                                                                                                                                                                                                                                                                                                                                                                                                                                                                                                                                                                                                                                                                                                                                                                                                                                                                                                                                                                                                                                                                                                                                                                                                                                                                                                                                                                                                                                                                                                                                                                                                                                                                                                                                                                                                                                                                                                                                                                                                                                                                                                                                                                                                                                                                                                                                                                                                                                                                                                                                                                                                                                                                                                                                                                                                                                                                                                                                                                                                                                                                                                                                                                                                                                                                                                                                                                                                                                                                                                                                                                                                                                                                                                                                                                                                                                                                                                                                                                                                                                                                                                                                                                                                                                                                                                                                                                                                                                                                                                                                                                                                                                                                                                                                                                                                                                                                                                                                                                                                                                                                                                                                                                                                                                                                                                                                                                             |
| 139 | AgBrO <sub>3</sub> , AgClO <sub>3</sub> , AgCsO, AgNaO, AgORb, Ag <sub>2</sub> BaGe <sub>2</sub> , Ag <sub>2</sub> BaSn <sub>2</sub> , Ag <sub>2</sub> Cl <sub>6</sub> Cs <sub>2</sub> , Ag <sub>2</sub> La <sub>2</sub> O <sub>10</sub> Ti <sub>3</sub> , Al <sub>2</sub> BaGe <sub>2</sub> , Al <sub>2</sub> CaGa <sub>2</sub> , Al <sub>2</sub> FK <sub>4</sub> Nb <sub>11</sub> O <sub>20</sub> , Al <sub>2</sub> Pd <sub>5</sub> U, Al <sub>3</sub> Hf, AsCa <sub>2</sub> , AsTiZr, As <sub>2</sub> BaZn <sub>2</sub> , As <sub>2</sub> Ba <sub>2</sub> O <sub>2</sub> Zn <sub>3</sub> , As <sub>2</sub> Ca <sub>4</sub> O, AuCsO, Au <sub>2</sub> Be, Au <sub>2</sub> Br <sub>6</sub> Cs <sub>2</sub> , Au <sub>2</sub> CaGe <sub>2</sub> , Au <sub>2</sub> CaSi <sub>2</sub> , Au <sub>2</sub> Cl <sub>6</sub> Cs <sub>2</sub> , Au <sub>2</sub> Cs <sub>2</sub> I <sub>6</sub> , Au <sub>2</sub> Ge <sub>2</sub> Sr, Au <sub>2</sub> Si <sub>2</sub> Sr, Au <sub>2</sub> Si <sub>2</sub> U, Ba <sub>11</sub> Bi <sub>10</sub> , BaBi <sub>2</sub> Cd, BaBi <sub>2</sub> Zn, BaBi <sub>4</sub> I <sub>2</sub> O <sub>4</sub> , BaCdSb <sub>2</sub> , BaCd <sub>2</sub> Ge <sub>2</sub> , BaGe <sub>2</sub> Mg <sub>2</sub> , BaMg <sub>2</sub> Si <sub>2</sub> , BaP <sub>2</sub> Zn <sub>2</sub> , BaP <sub>4</sub> Pd <sub>2</sub> , BaSi <sub>2</sub> , BaSi <sub>2</sub> Zn <sub>2</sub> , Ba <sub>2</sub> F <sub>2</sub> O <sub>2</sub> Pd, Ba <sub>2</sub> F <sub>6</sub> Zn, Ba <sub>2</sub> N <sub>2</sub> Zn, Ba <sub>2</sub> O <sub>4</sub> Pb, Ba <sub>2</sub> O <sub>4</sub> Sn, Ba <sub>2</sub> O <sub>4</sub> Zr, Ba <sub>3</sub> Br <sub>2</sub> In <sub>2</sub> O <sub>5</sub> , Ba <sub>3</sub> Cl <sub>2</sub> In <sub>2</sub> O <sub>5</sub> , Ba <sub>3</sub> Cl <sub>2</sub> O <sub>5</sub> Tl <sub>2</sub> , Ba <sub>3</sub> S <sub>7</sub> Zr <sub>2</sub> , Ba <sub>4</sub> OSb <sub>2</sub> , Be <sub>12</sub> Mo, Be <sub>12</sub> W, BePd <sub>2</sub> , Bi <sub>10</sub> Ca <sub>11</sub> , Bi <sub>10</sub> Sr <sub>11</sub> , BiCa <sub>2</sub> , Bi <sub>2</sub> Ca <sub>4</sub> O, Bi <sub>2</sub> CdSr, Bi <sub>2</sub> O <sub>2</sub> Se, Bi <sub>2</sub> O <sub>9</sub> SrTa <sub>2</sub> , Bi <sub>2</sub> Pd, Bi <sub>2</sub> SrZn, Br <sub>2</sub> Ca <sub>3</sub> Si, Br <sub>2</sub> Hg <sub>2</sub> , Br <sub>3</sub> Li <sub>7</sub> O <sub>2</sub> , C, CLi <sub>2</sub> N <sub>2</sub> , C <sub>2</sub> PtU <sub>2</sub> , C <sub>2</sub> Si <sub>2</sub> U <sub>3</sub> , C <sub>4</sub> AuBa <sub>4</sub> KO <sub>4</sub> , CaCs <sub>2</sub> F <sub>4</sub> , CaGe <sub>2</sub> Zn <sub>2</sub> , CaIn, CaO <sub>3</sub> Si, CaSi <sub>2</sub> Zn <sub>2</sub> , CaSi <sub>3</sub> , Ca <sub>2</sub> GeO <sub>4</sub> , Ca <sub>2</sub> N <sub>2</sub> Zn, Ca <sub>2</sub> O <sub>4</sub> Si, Ca <sub>2</sub> Pd <sub>3</sub> Sb <sub>4</sub> , Ca <sub>4</sub> OP <sub>2</sub> , Ca <sub>4</sub> OSb <sub>2</sub> , CdCl <sub>4</sub> Rb <sub>2</sub> , CdHF <sub>2</sub> , CdHg <sub>2</sub> , Cd <sub>2</sub> Ga <sub>2</sub> Sr, Cd <sub>2</sub> Ge <sub>2</sub> Sr, Cd <sub>2</sub> Hg, Cl <sub>10</sub> K <sub>4</sub> ORe <sub>2</sub> , Cl <sub>2</sub> Hg <sub>2</sub> , Cl <sub>4</sub> K <sub>2</sub> Mg, Cl <sub>6</sub> Cs <sub>2</sub> HgPd, Cl <sub>7</sub> Cs <sub>3</sub> Mg <sub>2</sub> , CsF <sub>3</sub> Li <sub>2</sub> , Cs <sub>2</sub> F <sub>4</sub> Hg, Cs <sub>2</sub> HgO <sub>2</sub> , Cs <sub>2</sub> I <sub>6</sub> Pd, Cs <sub>3</sub> F <sub>6</sub> Tl, Cs <sub>3</sub> F <sub>6</sub> Y, F <sub>2</sub> Hg <sub>2</sub> , F <sub>2</sub> Xe, F <sub>3</sub> La, F <sub>4</sub> HgRb <sub>2</sub> , F <sub>4</sub> K <sub>2</sub> Mg, F <sub>4</sub> MgRb <sub>2</sub> , F <sub>4</sub> Pb, F <sub>4</sub> Sn, F <sub>6</sub> Rb <sub>3</sub> Tl, F <sub>6</sub> Rb <sub>3</sub> Y, F <sub>7</sub> K <sub>3</sub> Zn <sub>2</sub> , F <sub>8</sub> Na <sub>2</sub> U, F <sub>8</sub> Na <sub>3</sub> Pa, Ga <sub>10</sub> Hf <sub>11</sub> , Ga <sub>3</sub> K <sub>2</sub> , Ga <sub>3</sub> Zr, Ga <sub>4</sub> Ti <sub>2</sub> Zr, GeLaSc, GeSTh, GeSeU, GeTeU, Ge <sub>2</sub> Pd <sub>2</sub> Th, Ge <sub>2</sub> Pt <sub>2</sub> Th, Ge <sub>2</sub> Pt <sub>2</sub> U, Ge <sub>2</sub> SrZn <sub>2</sub> , Ge <sub>4</sub> In <sub>6</sub> La <sub>11</sub> , Hf <sub>2</sub> Zn, Hg, Hg <sub>2</sub> I <sub>2</sub> , Hg <sub>2</sub> In <sub>2</sub> Sr, Hg <sub>2</sub> Mg, In <sub>3</sub> Rb <sub>2</sub> , In <sub>3</sub> Zr, K <sub>2</sub> Mg <sub>5</sub> Sn <sub>3</sub> , K <sub>2</sub> O <sub>4</sub> U, K <sub>2</sub> O <sub>7</sub> SrTa <sub>2</sub> , La <sub>11</sub> Sn <sub>10</sub> , LaSbSc, LaScSi, La <sub>2</sub> O <sub>4</sub> Pd, LiPd <sub>2</sub> Tl, Li <sub>2</sub> O <sub>7</sub> SrTa <sub>2</sub> , LuSbZr, MgO <sub>6</sub> ReSr <sub>2</sub> , MgPd <sub>3</sub> , Mg <sub>2</sub> O <sub>4</sub> Si, Mo <sub>3</sub> Sb <sub>7</sub> , N <sub>2</sub> Sr <sub>2</sub> Zn, N <sub>2</sub> TeTh <sub>2</sub> , OP <sub>2</sub> Sr <sub>4</sub> , O <sub>2</sub> TeU <sub>2</sub> , O <sub>4</sub> Rb <sub>2</sub> U, O <sub>4</sub> SnSr <sub>2</sub> , O <sub>4</sub> Sr <sub>2</sub> Ti, O <sub>7</sub> Sr <sub>3</sub> Ti <sub>2</sub> , PtTeU, PdTi <sub>2</sub> , Pd <sub>2</sub> Si <sub>2</sub> Th, Pd <sub>2</sub> Ti, Pt <sub>2</sub> Si <sub>2</sub> Th, Pt <sub>2</sub> Si <sub>2</sub> U, Pt <sub>2</sub> Th, Pt <sub>8</sub> Ti, SSiTh, SbYZr, SeSiTh, SeSiU, Si, Sn, ThZn <sub>4</sub> , Ti <sub>2</sub> Zn, |
| 140 | AgAuF <sub>4</sub> , AgF <sub>4</sub> K, AgF <sub>4</sub> Na, AgI <sub>2</sub> Tl, AgN <sub>3</sub> , AlFO <sub>4</sub> Sr <sub>3</sub> , AlF <sub>4</sub> Tl, AlKTe <sub>2</sub> , AlLaO <sub>3</sub> , AlNaSe <sub>2</sub> , AlNaTe <sub>2</sub> , AlSe <sub>2</sub> Tl, AuF <sub>11</sub> Th <sub>2</sub> , AuF <sub>4</sub> K, AuF <sub>4</sub> Na, AuF <sub>4</sub> Rb, B <sub>2</sub> Mo <sub>5</sub> Si, BaBe <sub>2</sub> N <sub>2</sub> , BaF <sub>4</sub> Pd, BaLa <sub>2</sub> O <sub>5</sub> Zn, BaLa <sub>2</sub> S <sub>5</sub> Zn, BaO <sub>3</sub> Pb, BaO <sub>3</sub> Zr, BaTe <sub>2</sub> , BaTe <sub>5</sub> U <sub>2</sub> , Ba <sub>3</sub> ClInS <sub>4</sub> , Ba <sub>3</sub> ClInSe <sub>4</sub> , Ba <sub>3</sub> O <sub>5</sub> Si, Ba <sub>3</sub> S <sub>5</sub> Ti, Ba <sub>4</sub> Bi <sub>3</sub> KO, Ba <sub>4</sub> KOSb <sub>3</sub> , Ba <sub>4</sub> ORbSb <sub>3</sub> , Ba <sub>6</sub> S <sub>14</sub> Zn <sub>6</sub> Zr, BeTa <sub>2</sub> , Be <sub>4</sub> Ca <sub>2</sub> N <sub>4</sub> , Be <sub>4</sub> N <sub>4</sub> Sr <sub>2</sub> , Bi, Bi <sub>3</sub> In <sub>5</sub> , Br <sub>13</sub> Cd <sub>3</sub> Cs <sub>7</sub> , BrF <sub>4</sub> K, BrF <sub>4</sub> Rb, BrSe <sub>2</sub> Tl <sub>5</sub> , BrTe <sub>2</sub> Tl <sub>5</sub> , Br <sub>5</sub> CdCs <sub>3</sub> , Br <sub>5</sub> CsSn <sub>2</sub> , Br <sub>5</sub> Cs <sub>3</sub> Zn, Br <sub>5</sub> InSn <sub>2</sub> , Br <sub>5</sub> Pb <sub>2</sub> Rb, Br <sub>5</sub> RbSn <sub>2</sub> , Br <sub>5</sub> Sn <sub>2</sub> Tl, C <sub>2</sub> B <sub>2</sub> Ca, CaF <sub>4</sub> Pd, CaO <sub>3</sub> Si, CaO <sub>3</sub> Ti, Ca <sub>5</sub> Hg <sub>3</sub> , Cd <sub>3</sub> Sr <sub>5</sub> , Cl <sub>3</sub> Li <sub>5</sub> O, Cl <sub>5</sub> CsPb <sub>2</sub> , Cl <sub>5</sub> CsSn <sub>2</sub> , Cl <sub>5</sub> Cs <sub>3</sub> Zn, Cl <sub>5</sub> KSn <sub>2</sub> , FGaO <sub>4</sub> Sr <sub>3</sub> , F <sub>4</sub> PbPd, F <sub>4</sub> PdSr, GaInSe <sub>2</sub> , GaNaTe <sub>2</sub> , GaTe <sub>2</sub> Tl, Ga <sub>2</sub> Lu <sub>3</sub> , Ga <sub>2</sub> Sc <sub>3</sub> , Ga <sub>2</sub> Y <sub>3</sub> , Ga <sub>3</sub> Ta <sub>5</sub> , GeNb <sub>3</sub> , GePt <sub>3</sub> , Ge <sub>3</sub> Sr <sub>5</sub> , HfO <sub>3</sub> Sr, Hf <sub>2</sub> Si, ISe <sub>2</sub> Tl <sub>5</sub> , I <sub>5</sub> InPb <sub>2</sub> , I <sub>5</sub> InSn <sub>2</sub> , I <sub>5</sub> InSr <sub>2</sub> , I <sub>5</sub> KSn <sub>2</sub> , InKTe <sub>2</sub> , InNaTe <sub>2</sub> , InRbTe <sub>2</sub> , InS <sub>2</sub> Tl, InSe <sub>2</sub> Tl, InTe, InTe <sub>2</sub> Tl, In <sub>5</sub> Sb <sub>3</sub> , KN <sub>3</sub> , Lu <sub>7</sub> Sb <sub>3</sub> , Mg <sub>2</sub> Pt, MoO <sub>3</sub> Sr, NO <sub>2</sub> SrTa, N <sub>3</sub> Tl, NaPPdS <sub>4</sub> , O <sub>3</sub> SnSr, O <sub>3</sub> SrTi, O <sub>3</sub> SrZr, PbSe <sub>2</sub> , PbSe <sub>3</sub> Tl <sub>4</sub> , Pb <sub>2</sub> Pt, PtTl <sub>2</sub> , STl, S <sub>2</sub> Sr, S <sub>2</sub> Tl <sub>2</sub> , Sb, SbTi <sub>3</sub> , Sb <sub>2</sub> Ti, Sc, SeTl, Se <sub>2</sub> Tl <sub>2</sub> , Se <sub>3</sub> SnTl <sub>4</sub> , SiTa <sub>2</sub> , SiU <sub>3</sub> , SiZr <sub>2</sub> , Si <sub>3</sub> Sr <sub>5</sub> , SnTe <sub>3</sub> Tl <sub>4</sub> , SnTe <sub>5</sub> Tl <sub>2</sub> , Sn <sub>3</sub> Sr <sub>5</sub> ,                                                                                                                                                                                                                                                                                                                                                                                                                                                                                                                                                                                                                                                                                                                                                                                                                                                                                                                                                                                                                                                                                                                                                                                                                                                                                                                                                                                                                                                                                                                                                                                                                                                                                                                                                                                                                                                                                                                                                                                                                                                                                                                                                  |
| 141 | AgLi, Ag <sub>8</sub> O <sub>4</sub> S <sub>2</sub> Si, AlLi, Al <sub>2</sub> Mg, Al <sub>2</sub> S <sub>3</sub> , Al <sub>2</sub> Ti, AsLuO <sub>4</sub> , AsO <sub>4</sub> Sc, AsO <sub>4</sub> Y, As <sub>2</sub> Cs <sub>2</sub> O <sub>8</sub> Th, AuBr,                                                                                                                                                                                                                                                                                                                                                                                                                                                                                                                                                                                                                                                                                                                                                                                                                                                                                                                                                                                                                                                                                                                                                                                                                                                                                                                                                                                                                                                                                                                                                                                                                                                                                                                                                                                                                                                                                                                                                                                                                                                                                                                                                                                                                                                                                                                                                                                                                                                                                                                                                                                                                                                                                                                                                                                                                                                                                                                                                                                                                                                                                                                                                                                                                                                                                                                                                                                                                                                                                                                                                                                                                                                                                                                                                                                                                                                                                                                                                                                                                                                                                                                                                                                                                                                                                                                                                                                                                                                                                                                                                                                                                                                                                                                                                                                                                                                                                                                                                                                                                                                                                                                                                                                                                                                                                                     |

Part 16 of all the predicted materials with band crossings from **Cases 1** or **2**:

|     |                                                                                                                                                                                                                                                                                                                                                                                                                                                                                                                                                                                                                                                                                                                                                                                                                                                                                                                                                                                                                                                                                                                                                                                                                                                                                                                                                                                                                                                                                                                                                                                                                                                                                                                                                                                                                                                                                                                                                                                                                                                                                                                                                                                                                                                                                                                                                                                                                                                                                                                                                                                                                                                                                                                                                                                                                                                                                                                                                                                                                                                                                                                                                                                                                                                                                                                                                                                                                                                                                                                                                                                                                                                                                                                                                                                                                                                                                                                                                                                                                                                                                                                                                                                                                                                                                                            |
|-----|------------------------------------------------------------------------------------------------------------------------------------------------------------------------------------------------------------------------------------------------------------------------------------------------------------------------------------------------------------------------------------------------------------------------------------------------------------------------------------------------------------------------------------------------------------------------------------------------------------------------------------------------------------------------------------------------------------------------------------------------------------------------------------------------------------------------------------------------------------------------------------------------------------------------------------------------------------------------------------------------------------------------------------------------------------------------------------------------------------------------------------------------------------------------------------------------------------------------------------------------------------------------------------------------------------------------------------------------------------------------------------------------------------------------------------------------------------------------------------------------------------------------------------------------------------------------------------------------------------------------------------------------------------------------------------------------------------------------------------------------------------------------------------------------------------------------------------------------------------------------------------------------------------------------------------------------------------------------------------------------------------------------------------------------------------------------------------------------------------------------------------------------------------------------------------------------------------------------------------------------------------------------------------------------------------------------------------------------------------------------------------------------------------------------------------------------------------------------------------------------------------------------------------------------------------------------------------------------------------------------------------------------------------------------------------------------------------------------------------------------------------------------------------------------------------------------------------------------------------------------------------------------------------------------------------------------------------------------------------------------------------------------------------------------------------------------------------------------------------------------------------------------------------------------------------------------------------------------------------------------------------------------------------------------------------------------------------------------------------------------------------------------------------------------------------------------------------------------------------------------------------------------------------------------------------------------------------------------------------------------------------------------------------------------------------------------------------------------------------------------------------------------------------------------------------------------------------------------------------------------------------------------------------------------------------------------------------------------------------------------------------------------------------------------------------------------------------------------------------------------------------------------------------------------------------------------------------------------------------------------------------------------------------------------------------|
| 141 | AuCl, BF <sub>5</sub> Li <sub>2</sub> , BLi <sub>3</sub> N <sub>2</sub> , BMo, BNbO <sub>4</sub> , BO <sub>4</sub> Ta, <b>BW</b> , BaCd <sub>11</sub> , BaGe <sub>2</sub> , BaO <sub>7</sub> U <sub>2</sub> , BeF <sub>12</sub> Li <sub>6</sub> Zr, Br <sub>12</sub> Rb <sub>4</sub> Sb <sub>2</sub> , BrCsO <sub>4</sub> , Br <sub>4</sub> Th, Br <sub>6</sub> Cs <sub>2</sub> Sb, Caln <sub>2</sub> O <sub>4</sub> , CaSi <sub>2</sub> , CaZn <sub>11</sub> , Cd <sub>11</sub> Sr, CdIn <sub>2</sub> O <sub>4</sub> , Cl <sub>2</sub> O, Cl <sub>6</sub> Cs <sub>2</sub> Sb, FMg <sub>2</sub> N, F <sub>2</sub> Na <sub>2</sub> O <sub>8</sub> SiU <sub>2</sub> , <b>GaZr</b> , <b>Ga<sub>2</sub>Hf</b> , <b>Ga<sub>2</sub>Th</b> , <b>Ge</b> , GeO <sub>4</sub> Th, HfO <sub>4</sub> Si, HgI <sub>2</sub> , I <sub>4</sub> Te, In <sub>2</sub> S <sub>3</sub> , <b>In<sub>2</sub>Zr</b> , LaO <sub>4</sub> P, LiO <sub>2</sub> Sc, Li <sub>4</sub> N <sub>2</sub> Sr, N <sub>2</sub> OSi <sub>2</sub> , <b>NbP</b> , O <sub>2</sub> Ti, O <sub>3</sub> U, O <sub>4</sub> SiTh, O <sub>4</sub> SiTi, <b>PTa</b> , <b>PbU</b> , <b>S<sub>2</sub>Zr<sub>9</sub></b> , <b>ScSn<sub>2</sub></b> , <b>Si</b> , Si <sub>2</sub> Sr, Si <sub>2</sub> Th, Si <sub>2</sub> U, <b>Sn</b> , SrZn <sub>11</sub> ,                                                                                                                                                                                                                                                                                                                                                                                                                                                                                                                                                                                                                                                                                                                                                                                                                                                                                                                                                                                                                                                                                                                                                                                                                                                                                                                                                                                                                                                                                                                                                                                                                                                                                                                                                                                                                                                                                                                                                                                                                                                                                                                                                                                                                                                                                                                                                                                                                                                                                                                                                                                                                                                                                                                                                                                                                                                                                                                                                                                                    |
| 142 | Al <sub>2</sub> CaCl <sub>8</sub> , Al <sub>2</sub> Cl <sub>8</sub> Sr, As <sub>2</sub> Zn <sub>3</sub> , <b>Au<sub>3</sub>Zn</b> , BeI <sub>2</sub> , Be <sub>3</sub> P <sub>2</sub> , Br <sub>2</sub> Zn, C <sub>2</sub> Na <sub>2</sub> , CsGe, CsPb, CsSi, CsSn, Cs <sub>2</sub> PdSe <sub>8</sub> , Cs <sub>4</sub> Sn <sub>4</sub> , Ga <sub>2</sub> Pt, GeK, GeRb, KPb, KSi, KSn, K <sub>4</sub> Sn <sub>4</sub> , K <sub>8</sub> Pb <sub>8</sub> , LaPS <sub>4</sub> , NaP <sub>7</sub> , NaPb, NaSn, Na <sub>4</sub> Sn <sub>4</sub> , PbRb, Pb <sub>4</sub> Rb <sub>4</sub> , RbSi, RbSn, Rb <sub>4</sub> Sn <sub>4</sub> ,                                                                                                                                                                                                                                                                                                                                                                                                                                                                                                                                                                                                                                                                                                                                                                                                                                                                                                                                                                                                                                                                                                                                                                                                                                                                                                                                                                                                                                                                                                                                                                                                                                                                                                                                                                                                                                                                                                                                                                                                                                                                                                                                                                                                                                                                                                                                                                                                                                                                                                                                                                                                                                                                                                                                                                                                                                                                                                                                                                                                                                                                                                                                                                                                                                                                                                                                                                                                                                                                                                                                                                                                                                                                      |
| 143 | Al <sub>5</sub> Mo, BaGe <sub>4</sub> O <sub>9</sub> , Ba <sub>3</sub> N <sub>4</sub> O <sub>9</sub> Si <sub>6</sub> , Br <sub>2</sub> Hg, C <sub>3</sub> N <sub>4</sub> , F <sub>6</sub> Na <sub>2</sub> U, Ge <sub>3</sub> O <sub>11</sub> Pb <sub>5</sub> , Ge <sub>9</sub> O <sub>33</sub> Pb <sub>15</sub> , K <sub>2</sub> O <sub>9</sub> Si <sub>3</sub> Zr, LaNb <sub>7</sub> O <sub>19</sub> , Li <sub>7</sub> O <sub>6</sub> Ta, MgO, Na <sub>4</sub> O <sub>12</sub> Ti <sub>5</sub> , S <sub>6</sub> ,                                                                                                                                                                                                                                                                                                                                                                                                                                                                                                                                                                                                                                                                                                                                                                                                                                                                                                                                                                                                                                                                                                                                                                                                                                                                                                                                                                                                                                                                                                                                                                                                                                                                                                                                                                                                                                                                                                                                                                                                                                                                                                                                                                                                                                                                                                                                                                                                                                                                                                                                                                                                                                                                                                                                                                                                                                                                                                                                                                                                                                                                                                                                                                                                                                                                                                                                                                                                                                                                                                                                                                                                                                                                                                                                                                                         |
| 144 | AsBBaO <sub>5</sub> , B <sub>2</sub> O <sub>3</sub> , Bi <sub>2</sub> O <sub>7</sub> Sn <sub>2</sub> , CsNO <sub>3</sub> , F <sub>4</sub> KTL, F <sub>4</sub> KY, Hg <sub>3</sub> O <sub>6</sub> S, TeZn,                                                                                                                                                                                                                                                                                                                                                                                                                                                                                                                                                                                                                                                                                                                                                                                                                                                                                                                                                                                                                                                                                                                                                                                                                                                                                                                                                                                                                                                                                                                                                                                                                                                                                                                                                                                                                                                                                                                                                                                                                                                                                                                                                                                                                                                                                                                                                                                                                                                                                                                                                                                                                                                                                                                                                                                                                                                                                                                                                                                                                                                                                                                                                                                                                                                                                                                                                                                                                                                                                                                                                                                                                                                                                                                                                                                                                                                                                                                                                                                                                                                                                                  |
| 145 | BeCl <sub>2</sub> ,                                                                                                                                                                                                                                                                                                                                                                                                                                                                                                                                                                                                                                                                                                                                                                                                                                                                                                                                                                                                                                                                                                                                                                                                                                                                                                                                                                                                                                                                                                                                                                                                                                                                                                                                                                                                                                                                                                                                                                                                                                                                                                                                                                                                                                                                                                                                                                                                                                                                                                                                                                                                                                                                                                                                                                                                                                                                                                                                                                                                                                                                                                                                                                                                                                                                                                                                                                                                                                                                                                                                                                                                                                                                                                                                                                                                                                                                                                                                                                                                                                                                                                                                                                                                                                                                                        |
| 146 | Ag <sub>2</sub> Nb <sub>4</sub> O <sub>11</sub> , Ag <sub>3</sub> IS, AlLiO <sub>4</sub> Si, Al <sub>4</sub> B <sub>6</sub> O <sub>15</sub> , As <sub>12</sub> Sn <sub>3</sub> Sr <sub>14</sub> , AsLiO <sub>4</sub> Zn, B <sub>2</sub> BaO <sub>4</sub> , B <sub>3</sub> Cl <sub>6</sub> N <sub>3</sub> , Ba <sub>3</sub> Lu <sub>4</sub> O <sub>9</sub> , Ba <sub>3</sub> O <sub>9</sub> Y <sub>4</sub> , Bi <sub>3</sub> Pd <sub>8</sub> , C, CCs <sub>4</sub> O <sub>4</sub> , CK <sub>4</sub> O <sub>4</sub> , CNa <sub>4</sub> O <sub>4</sub> , CdPS <sub>3</sub> , Cl <sub>3</sub> CsGe, Cs <sub>6</sub> S <sub>27</sub> Ti <sub>6</sub> , F <sub>3</sub> MoNa <sub>3</sub> O <sub>3</sub> , GaLiO <sub>4</sub> Si, Ga <sub>4</sub> Pd <sub>7</sub> Zn <sub>3</sub> , GeLa <sub>2</sub> MgO <sub>6</sub> , IKO <sub>3</sub> , InMg <sub>3</sub> , KO <sub>12</sub> Sb <sub>3</sub> Zn <sub>4</sub> , K <sub>2</sub> O <sub>3</sub> Sn <sub>2</sub> , K <sub>2</sub> O <sub>9</sub> Si <sub>3</sub> Ti, K <sub>4</sub> O <sub>18</sub> Si <sub>6</sub> Sn <sub>2</sub> , Li <sub>2</sub> O <sub>6</sub> TeZr, Li <sub>7</sub> O <sub>6</sub> Sb, Mg <sub>9</sub> Sn <sub>5</sub> , Nb <sub>2</sub> O <sub>6</sub> Pb, O <sub>11</sub> PbTa <sub>4</sub> , Pd <sub>8</sub> Sb <sub>3</sub> , STl <sub>2</sub> ,                                                                                                                                                                                                                                                                                                                                                                                                                                                                                                                                                                                                                                                                                                                                                                                                                                                                                                                                                                                                                                                                                                                                                                                                                                                                                                                                                                                                                                                                                                                                                                                                                                                                                                                                                                                                                                                                                                                                                                                                                                                                                                                                                                                                                                                                                                                                                                                                                                                                                                                                                                                                                                                                                                                                                                                                                                                                                                                                                                                       |
| 147 | Al <sub>2</sub> BaO <sub>8</sub> Si <sub>2</sub> , As <sub>2</sub> K <sub>2</sub> S <sub>6</sub> Sn, As <sub>2</sub> S <sub>6</sub> SnTl <sub>2</sub> , As <sub>6</sub> BiK <sub>3</sub> Se <sub>12</sub> , <b>Au<sub>7</sub>In<sub>3</sub></b> , BaCa <sub>2</sub> MgO <sub>8</sub> Si <sub>2</sub> , Ba <sub>3</sub> MgO <sub>8</sub> Si <sub>2</sub> , Bi <sub>2</sub> O <sub>6</sub> U, <b>Bi<sub>2</sub>Pt</b> , Br <sub>3</sub> InK, C <sub>3</sub> N <sub>4</sub> , Cd <sub>2</sub> Na <sub>14</sub> O <sub>9</sub> , Cd <sub>3</sub> Cl <sub>3</sub> P, F <sub>6</sub> KNaTh, Ge <sub>2</sub> K <sub>2</sub> O <sub>7</sub> Pb <sub>2</sub> , <b>Ge<sub>9</sub>Pd<sub>25</sub></b> , InSiTe <sub>3</sub> , K <sub>2</sub> O <sub>3</sub> Te, K <sub>2</sub> O <sub>7</sub> Pb <sub>2</sub> Si <sub>2</sub> , K <sub>3</sub> NaO <sub>8</sub> Se <sub>2</sub> , Li <sub>14</sub> N <sub>6</sub> O <sub>3</sub> P <sub>2</sub> , Li <sub>2</sub> N <sub>2</sub> Th, Li <sub>2</sub> N <sub>2</sub> U, Na <sub>2</sub> O <sub>3</sub> S, O <sub>7</sub> Si <sub>2</sub> Tl <sub>6</sub> , <b>O<sub>8</sub>U<sub>3</sub></b> , O <sub>9</sub> SZr <sub>3</sub> , Rb <sub>4</sub> Sb <sub>6</sub> Sn,                                                                                                                                                                                                                                                                                                                                                                                                                                                                                                                                                                                                                                                                                                                                                                                                                                                                                                                                                                                                                                                                                                                                                                                                                                                                                                                                                                                                                                                                                                                                                                                                                                                                                                                                                                                                                                                                                                                                                                                                                                                                                                                                                                                                                                                                                                                                                                                                                                                                                                                                                                                                                                                                                                                                                                                                                                                                                                                                                                                                                                                                                                   |
| 148 | AgAsS <sub>2</sub> , AgBiP <sub>2</sub> Se <sub>6</sub> , AgI <sub>3</sub> Tl <sub>2</sub> , AgO <sub>3</sub> Sb, Ag <sub>2</sub> I <sub>6</sub> O <sub>18</sub> Ti, AlF <sub>3</sub> , AlF <sub>6</sub> K <sub>2</sub> Li, AlGeLiO <sub>4</sub> , AsCsF <sub>6</sub> , AsF <sub>6</sub> In, AsF <sub>6</sub> K, AsF <sub>6</sub> Li, AsF <sub>6</sub> Na, AsF <sub>6</sub> Rb, AsF <sub>6</sub> Tl, AsI <sub>3</sub> , AsLiO <sub>3</sub> , AuClO, AuF <sub>6</sub> Li, B <sub>2</sub> BaO <sub>6</sub> Ti, B <sub>2</sub> CaO <sub>6</sub> Sn, B <sub>2</sub> MgO <sub>6</sub> Sn, B <sub>6</sub> Ba <sub>2</sub> O <sub>12</sub> Pb, B <sub>6</sub> Si <sub>2</sub> Sr <sub>3</sub> , BaBiO <sub>3</sub> , BaF <sub>6</sub> Sn, Ba <sub>2</sub> BiLuO <sub>6</sub> , Ba <sub>2</sub> BiO <sub>6</sub> Sb, Ba <sub>2</sub> BiO <sub>6</sub> Ta, Ba <sub>2</sub> Bi <sub>2</sub> O <sub>6</sub> , Ba <sub>2</sub> LaO <sub>6</sub> Sb, Ba <sub>2</sub> LaO <sub>6</sub> Ta, Ba <sub>2</sub> O <sub>6</sub> SrTe, Ba <sub>2</sub> O <sub>6</sub> SrU, Ba <sub>2</sub> O <sub>6</sub> SrW, Ba <sub>2</sub> O <sub>6</sub> TiZr, Ba <sub>9</sub> O <sub>24</sub> Sc <sub>2</sub> Si <sub>6</sub> , BeF <sub>4</sub> Li <sub>2</sub> , BiCsF <sub>6</sub> , BiF <sub>6</sub> Li, BiF <sub>6</sub> Na, BiF <sub>6</sub> Rb, BiI <sub>3</sub> , BiNaO <sub>3</sub> , Bi <sub>2</sub> Si <sub>2</sub> Te <sub>6</sub> , Br <sub>14</sub> Re <sub>6</sub> Te <sub>14</sub> , BrCsF <sub>6</sub> , Br <sub>3</sub> Pt, Br <sub>6</sub> W, CCs <sub>2</sub> I <sub>18</sub> Zr <sub>7</sub> , Cl <sub>12</sub> Zr <sub>6</sub> , C <sub>2</sub> MgNa <sub>2</sub> O <sub>6</sub> , CaF <sub>6</sub> Pd, CaF <sub>6</sub> Pt, CaF <sub>6</sub> Si, CaF <sub>6</sub> Sn, CaO <sub>3</sub> Sn, Ca <sub>2</sub> Hf <sub>7</sub> O <sub>16</sub> , Ca <sub>3</sub> O <sub>6</sub> U, CdF <sub>6</sub> Pd, CdF <sub>6</sub> Pt, CdF <sub>6</sub> Sn, CdF <sub>6</sub> Ti, CdGeO <sub>3</sub> , CdO <sub>3</sub> S, CdO <sub>3</sub> Sn, CdO <sub>3</sub> Ti, Cd <sub>2</sub> P <sub>2</sub> Se <sub>6</sub> , <b>Cl<sub>12</sub>NSc<sub>7</sub></b> , Cl <sub>18</sub> Cs <sub>2</sub> Nb <sub>6</sub> Pb, Cl <sub>18</sub> Cs <sub>2</sub> PbTa <sub>6</sub> , Cl <sub>18</sub> K <sub>2</sub> Nb <sub>6</sub> Sr, Cl <sub>2</sub> Pd, Cl <sub>3</sub> Pt, Cl <sub>3</sub> Sc, Cl <sub>6</sub> W, Cl <sub>8</sub> O <sub>12</sub> Si <sub>8</sub> , CsF <sub>6</sub> Nb, CsF <sub>6</sub> Sb, CsO <sub>8</sub> Te <sub>3</sub> Y, Cs <sub>2</sub> I <sub>6</sub> O <sub>18</sub> Zr, Cs <sub>8</sub> OTl <sub>8</sub> , FKO <sub>6</sub> Te <sub>3</sub> , F <sub>31</sub> Rb <sub>7</sub> Th <sub>6</sub> , F <sub>3</sub> N <sub>3</sub> S <sub>3</sub> , F <sub>6</sub> LiNb, F <sub>6</sub> LiSb, F <sub>6</sub> LiTa, F <sub>6</sub> MgPb, F <sub>6</sub> PbZn, F <sub>6</sub> PdZn, F <sub>6</sub> PtZn, F <sub>6</sub> RbSb, F <sub>6</sub> SnZn, Ge, GeMgO <sub>3</sub> , GeO <sub>3</sub> Pb, GeO <sub>3</sub> Zn, GeO <sub>4</sub> Zn <sub>2</sub> , Ge <sub>2</sub> In <sub>2</sub> Te <sub>6</sub> , HfTe <sub>4</sub> Tl <sub>4</sub> , I <sub>3</sub> InO <sub>9</sub> , I <sub>3</sub> O <sub>9</sub> Sc, I <sub>3</sub> O <sub>9</sub> Tl, I <sub>3</sub> Sb, I <sub>3</sub> Y, I <sub>6</sub> K <sub>2</sub> O <sub>18</sub> Zr, I <sub>6</sub> O <sub>18</sub> Rb <sub>2</sub> Zr, In <sub>6</sub> O <sub>12</sub> Te, In <sub>6</sub> O <sub>12</sub> W, La <sub>4</sub> O <sub>12</sub> Ti <sub>3</sub> , La <sub>6</sub> O <sub>12</sub> U, Li <sub>16</sub> N <sub>8</sub> Nb <sub>2</sub> O, Li <sub>16</sub> N <sub>8</sub> OTa <sub>2</sub> , LiNbO <sub>3</sub> , LiS <sub>2</sub> Sb, Li <sub>2</sub> O <sub>4</sub> Se, Li <sub>2</sub> O <sub>4</sub> W, Li <sub>6</sub> O <sub>6</sub> Te, Li <sub>6</sub> O <sub>6</sub> U, Li <sub>8</sub> O <sub>6</sub> Pb, Li <sub>8</sub> O <sub>6</sub> Pt, Li <sub>8</sub> O <sub>6</sub> Sn, Lu <sub>6</sub> O <sub>12</sub> U, MgO <sub>13</sub> Te <sub>6</sub> , MgO <sub>3</sub> Ti, Mg <sub>2</sub> P <sub>2</sub> Se <sub>6</sub> , Mg <sub>3</sub> O <sub>6</sub> Te, <b>Mo<sub>18</sub>S<sub>22</sub>Tl<sub>4</sub></b> , <b>Mo<sub>3</sub>S<sub>4</sub></b> , <b>Mo<sub>3</sub>Se<sub>4</sub></b> , <b>Mo<sub>6</sub>S<sub>8</sub></b> , |

Part 17 of all the predicted materials with band crossings from **Cases 1** or **2**:

|     |                                                                                                                                                                                                                                                                                                                                                                                                                                                                                                                                                                                                                                                                                                                                                                                                                                                                                                                                                                                                                                                                                                                                                                                                                                                                                                                                                                                                                                                                                                                                                                                                                                                                                                                                                                                                                                                                                                                                            |
|-----|--------------------------------------------------------------------------------------------------------------------------------------------------------------------------------------------------------------------------------------------------------------------------------------------------------------------------------------------------------------------------------------------------------------------------------------------------------------------------------------------------------------------------------------------------------------------------------------------------------------------------------------------------------------------------------------------------------------------------------------------------------------------------------------------------------------------------------------------------------------------------------------------------------------------------------------------------------------------------------------------------------------------------------------------------------------------------------------------------------------------------------------------------------------------------------------------------------------------------------------------------------------------------------------------------------------------------------------------------------------------------------------------------------------------------------------------------------------------------------------------------------------------------------------------------------------------------------------------------------------------------------------------------------------------------------------------------------------------------------------------------------------------------------------------------------------------------------------------------------------------------------------------------------------------------------------------|
| 148 | NaNbO <sub>3</sub> , NaO <sub>3</sub> Sb, Na <sub>8</sub> O <sub>18</sub> Si <sub>7</sub> , Nb <sub>6</sub> O <sub>12</sub> Ti <sub>2</sub> , O <sub>12</sub> TeTl <sub>6</sub> , O <sub>12</sub> TeY <sub>6</sub> , O <sub>12</sub> UY <sub>6</sub> , O <sub>12</sub> WY <sub>6</sub> , O <sub>2</sub> Si, O <sub>3</sub> SbTl, O <sub>3</sub> SiZn, O <sub>3</sub> SnZn, O <sub>3</sub> TiZn, O <sub>4</sub> SiZn <sub>2</sub> , O <sub>6</sub> TeTl <sub>6</sub> , O <sub>9</sub> Te <sub>4</sub> , P <sub>2</sub> S <sub>6</sub> Sn <sub>2</sub> , S, S <sub>6</sub> , Se <sub>6</sub> , Si,                                                                                                                                                                                                                                                                                                                                                                                                                                                                                                                                                                                                                                                                                                                                                                                                                                                                                                                                                                                                                                                                                                                                                                                                                                                                                                                                           |
| 149 | As <sub>2</sub> CaO <sub>6</sub> , GeIO <sub>6</sub> Rb, GeO <sub>6</sub> SrTe, OTi <sub>3</sub> , O <sub>6</sub> PbSb <sub>2</sub> ,                                                                                                                                                                                                                                                                                                                                                                                                                                                                                                                                                                                                                                                                                                                                                                                                                                                                                                                                                                                                                                                                                                                                                                                                                                                                                                                                                                                                                                                                                                                                                                                                                                                                                                                                                                                                      |
| 150 | AlCaF <sub>6</sub> Na, AlF <sub>3</sub> , AlF <sub>6</sub> LiMg, As <sub>2</sub> Cl <sub>9</sub> Cs <sub>3</sub> , As <sub>2</sub> O <sub>14</sub> Pb <sub>3</sub> TeZn <sub>3</sub> , B <sub>2</sub> Ga <sub>2</sub> K <sub>2</sub> O <sub>7</sub> , BaGe <sub>4</sub> O <sub>9</sub> , Ba <sub>3</sub> Ga <sub>2</sub> Ge <sub>4</sub> O <sub>14</sub> , Ba <sub>3</sub> Ga <sub>3</sub> NbO <sub>14</sub> Si <sub>2</sub> , Bi <sub>2</sub> Cl <sub>9</sub> Cs <sub>3</sub> , Ca <sub>3</sub> Ga <sub>3</sub> O <sub>14</sub> Si <sub>2</sub> Ta, Cl <sub>9</sub> Cs <sub>3</sub> Sb <sub>2</sub> , Cs <sub>2</sub> O <sub>3</sub> Te, F <sub>6</sub> GeLi <sub>2</sub> , F <sub>6</sub> GeNa <sub>2</sub> , F <sub>6</sub> K <sub>2</sub> U, F <sub>6</sub> Li <sub>2</sub> Si, F <sub>6</sub> Na <sub>2</sub> Pt, F <sub>6</sub> Na <sub>2</sub> Th, F <sub>6</sub> Na <sub>2</sub> U, Ga <sub>2</sub> Ge <sub>4</sub> O <sub>14</sub> Pb <sub>3</sub> , Ga <sub>3</sub> NbO <sub>14</sub> Si <sub>2</sub> Sr <sub>3</sub> , Ga <sub>3</sub> O <sub>14</sub> Si <sub>2</sub> Sr <sub>3</sub> Ta, Ga <sub>5</sub> La <sub>3</sub> O <sub>14</sub> Sn, Ge <sub>4</sub> O <sub>9</sub> Pb, Ge <sub>4</sub> O <sub>9</sub> Sr, In <sub>2</sub> O <sub>6</sub> Te, K <sub>2</sub> O <sub>6</sub> S <sub>2</sub> , La <sub>2</sub> O <sub>3</sub> , O <sub>6</sub> Rb <sub>2</sub> S <sub>2</sub> , O <sub>6</sub> Sc <sub>2</sub> Te, O <sub>6</sub> TeTl <sub>2</sub> ,                                                                                                                                                                                                                                                                                                                                                                                                                                                                   |
| 151 | Cl <sub>3</sub> Ti, Li <sub>5</sub> O <sub>6</sub> Re,                                                                                                                                                                                                                                                                                                                                                                                                                                                                                                                                                                                                                                                                                                                                                                                                                                                                                                                                                                                                                                                                                                                                                                                                                                                                                                                                                                                                                                                                                                                                                                                                                                                                                                                                                                                                                                                                                     |
| 152 | AgPb <sub>4</sub> Pd <sub>6</sub> , AlAsO <sub>4</sub> , AsBO <sub>4</sub> , AsGaO <sub>4</sub> , BF <sub>4</sub> Li, BO <sub>5</sub> PSr, B <sub>2</sub> O <sub>3</sub> , B <sub>7</sub> Cs <sub>3</sub> Li <sub>4</sub> O <sub>14</sub> , BaO <sub>2</sub> Zn, BeF <sub>2</sub> , CdTe, GeO <sub>2</sub> , HgO, HgS, HgTe, Hg <sub>3</sub> O <sub>6</sub> S, K <sub>2</sub> P <sub>2</sub> Se <sub>6</sub> , Li <sub>2</sub> O <sub>4</sub> SiSr, O <sub>2</sub> Si, O <sub>2</sub> Ti, P <sub>2</sub> Rb <sub>2</sub> Se <sub>6</sub> , Se, TeZn,                                                                                                                                                                                                                                                                                                                                                                                                                                                                                                                                                                                                                                                                                                                                                                                                                                                                                                                                                                                                                                                                                                                                                                                                                                                                                                                                                                                       |
| 154 | AlO <sub>4</sub> P, HgO, HgO <sub>2</sub> Sr, HgS, O <sub>23</sub> S <sub>5</sub> Te <sub>4</sub> , S, Te,                                                                                                                                                                                                                                                                                                                                                                                                                                                                                                                                                                                                                                                                                                                                                                                                                                                                                                                                                                                                                                                                                                                                                                                                                                                                                                                                                                                                                                                                                                                                                                                                                                                                                                                                                                                                                                 |
| 155 | AlF <sub>3</sub> , Al <sub>2</sub> B <sub>2</sub> BaO <sub>7</sub> , Al <sub>2</sub> BaO <sub>7</sub> Sb <sub>2</sub> , Al <sub>7</sub> Te <sub>10</sub> , AsF <sub>7</sub> Sn, BBe <sub>2</sub> CsF <sub>2</sub> O <sub>3</sub> , BBe <sub>2</sub> F <sub>2</sub> KO <sub>3</sub> , C <sub>4</sub> CaMg <sub>3</sub> O <sub>12</sub> , Ca <sub>3</sub> Na <sub>2</sub> O <sub>9</sub> Ta <sub>2</sub> , F <sub>3</sub> Sc, Ga <sub>3</sub> InTe <sub>5</sub> , Ga <sub>3</sub> NaTe <sub>5</sub> , Ga <sub>7</sub> Te <sub>10</sub> , In <sub>7</sub> Te <sub>10</sub> , O <sub>2</sub> Si, O <sub>8</sub> RbS <sub>2</sub> Tl,                                                                                                                                                                                                                                                                                                                                                                                                                                                                                                                                                                                                                                                                                                                                                                                                                                                                                                                                                                                                                                                                                                                                                                                                                                                                                                           |
| 156 | AgAlS <sub>2</sub> , Ag <sub>6</sub> ClF <sub>3</sub> Mo <sub>2</sub> O <sub>7</sub> , AlF <sub>6</sub> K <sub>2</sub> Li, BBeLi, BiTe, Br <sub>7</sub> Nb <sub>3</sub> S, CSi, CdGaInS <sub>4</sub> , CdI <sub>2</sub> , I <sub>2</sub> Pb, I <sub>7</sub> Nb <sub>3</sub> Te, InLiMo <sub>3</sub> O <sub>8</sub> , In <sub>2</sub> S <sub>6</sub> Zn <sub>3</sub> , LiMo <sub>3</sub> O <sub>8</sub> Sc, LiMo <sub>3</sub> O <sub>8</sub> Y, SZn, Sb <sub>2</sub> Te <sub>3</sub> ,                                                                                                                                                                                                                                                                                                                                                                                                                                                                                                                                                                                                                                                                                                                                                                                                                                                                                                                                                                                                                                                                                                                                                                                                                                                                                                                                                                                                                                                      |
| 157 | As <sub>5</sub> Cs <sub>3</sub> O <sub>9</sub> , Au <sub>6</sub> Cs <sub>4</sub> S <sub>5</sub> , Bi <sub>2</sub> Pt,                                                                                                                                                                                                                                                                                                                                                                                                                                                                                                                                                                                                                                                                                                                                                                                                                                                                                                                                                                                                                                                                                                                                                                                                                                                                                                                                                                                                                                                                                                                                                                                                                                                                                                                                                                                                                      |
| 158 | F <sub>6</sub> O <sub>4</sub> P <sub>4</sub> ,                                                                                                                                                                                                                                                                                                                                                                                                                                                                                                                                                                                                                                                                                                                                                                                                                                                                                                                                                                                                                                                                                                                                                                                                                                                                                                                                                                                                                                                                                                                                                                                                                                                                                                                                                                                                                                                                                             |
| 159 | AgBa <sub>7</sub> Ga <sub>5</sub> Se <sub>15</sub> , AlKO <sub>4</sub> Si, Ba <sub>3</sub> MoN <sub>4</sub> , Bi <sub>2</sub> O <sub>3</sub> , Br <sub>6</sub> Cl <sub>8</sub> Cs <sub>2</sub> Mo <sub>6</sub> , Br <sub>6</sub> Cl <sub>8</sub> Cs <sub>2</sub> W <sub>6</sub> , C <sub>3</sub> N <sub>4</sub> , Ge <sub>3</sub> N <sub>4</sub> , K <sub>5</sub> NaSe <sub>27</sub> Ti <sub>6</sub> , Mo <sub>3</sub> O <sub>12</sub> SeTl <sub>2</sub> , N <sub>4</sub> Si <sub>3</sub> , O <sub>12</sub> Rb <sub>2</sub> TeW <sub>3</sub> , OTi <sub>6</sub> ,                                                                                                                                                                                                                                                                                                                                                                                                                                                                                                                                                                                                                                                                                                                                                                                                                                                                                                                                                                                                                                                                                                                                                                                                                                                                                                                                                                          |
| 160 | AgNO <sub>3</sub> , Al <sub>2</sub> MgS <sub>4</sub> , Al <sub>2</sub> MgSe <sub>4</sub> , Al <sub>2</sub> S <sub>4</sub> Zn, AsS <sub>3</sub> Tl <sub>3</sub> , AsSe <sub>3</sub> Tl <sub>3</sub> , As <sub>2</sub> Sn <sub>2</sub> Sr, As <sub>2</sub> Te <sub>3</sub> , As <sub>4</sub> Pb <sub>9</sub> S <sub>15</sub> , BN, B <sub>3</sub> Be <sub>3</sub> F <sub>4</sub> NaO <sub>9</sub> Sr <sub>3</sub> , BaO <sub>3</sub> Ti, Be <sub>3</sub> N <sub>2</sub> , Bi <sub>2</sub> Ge <sub>3</sub> Te <sub>6</sub> , Bi <sub>2</sub> O <sub>3</sub> , Bi <sub>2</sub> Te <sub>3</sub> , BrCsO <sub>3</sub> , BrKO <sub>3</sub> , BrO <sub>3</sub> Rb, BrO <sub>3</sub> Tl, Br <sub>3</sub> CsGe, CAgN, CCs <sub>4</sub> O <sub>4</sub> , CIN, CLi <sub>4</sub> O <sub>4</sub> , CNa <sub>4</sub> O <sub>4</sub> , COS, CO <sub>4</sub> Rb <sub>4</sub> , C <sub>3</sub> Al <sub>4</sub> , C <sub>3</sub> Al <sub>6</sub> N <sub>2</sub> , C <sub>3</sub> N <sub>4</sub> , C <sub>5</sub> Al <sub>4</sub> Zr <sub>2</sub> , C <sub>6</sub> Al <sub>4</sub> Zr <sub>3</sub> , Ca <sub>3</sub> O <sub>5</sub> Si, Cd <sub>4</sub> K <sub>6</sub> Se <sub>13</sub> Sn <sub>3</sub> , ClKO <sub>3</sub> , ClO <sub>3</sub> Rb, ClO <sub>3</sub> Tl, Cl <sub>2</sub> Zr, Cl <sub>3</sub> CsGe, Cl <sub>8</sub> Na <sub>2</sub> Ti <sub>3</sub> , CsGeI <sub>3</sub> , F <sub>4</sub> OU, GaSe, GeTe, IKO <sub>3</sub> , IO <sub>3</sub> Rb, I <sub>3</sub> S <sub>24</sub> Sb, InSe, In <sub>2</sub> S <sub>5</sub> Zn <sub>2</sub> , In <sub>2</sub> Se <sub>3</sub> , In <sub>3</sub> O <sub>12</sub> Sb <sub>5</sub> , KNbO <sub>3</sub> , Li <sub>5</sub> NaSn <sub>4</sub> , MoS <sub>2</sub> , MoSe <sub>2</sub> , N <sub>3</sub> Na, Nb <sub>2</sub> O <sub>6</sub> Pb, PbS, SZn, S <sub>2</sub> Ta, S <sub>2</sub> W, S <sub>3</sub> SbTl <sub>3</sub> , S <sub>3</sub> Ti, Sb <sub>2</sub> Se <sub>2</sub> Te, Se <sub>2</sub> Ta, |
| 161 | AgNO <sub>3</sub> , AgO <sub>3</sub> Ta, Ag <sub>2</sub> Nb <sub>4</sub> O <sub>11</sub> , Ag <sub>3</sub> AsS <sub>3</sub> , Ag <sub>3</sub> AsSe <sub>3</sub> , Ag <sub>3</sub> NO <sub>3</sub> Se, Ag <sub>3</sub> S <sub>3</sub> Sb, AlBiO <sub>3</sub> , B <sub>2</sub> BaO <sub>6</sub> Zr, B <sub>7</sub> ClO <sub>13</sub> Zn <sub>3</sub> , B <sub>9</sub> BaNaO <sub>15</sub> , B <sub>9</sub> LiO <sub>15</sub> Sr, BiCs <sub>2</sub> Mo <sub>3</sub> NaO <sub>12</sub> , Br <sub>4</sub> Ga <sub>2</sub> , CdCl <sub>6</sub> KRb <sub>3</sub> , CdF <sub>3</sub> Na, Cl <sub>3</sub> LuO <sub>12</sub> , CsF <sub>3</sub> Pb, GaLaO <sub>3</sub> , Ga <sub>2</sub> I <sub>4</sub> , GeO <sub>3</sub> Zn, Ge <sub>3</sub> La <sub>4</sub> S <sub>12</sub> , I <sub>4</sub> InRb, K <sub>3</sub> SbSe <sub>4</sub> , LiO <sub>3</sub> Ta, NaNbO <sub>3</sub> , O <sub>10</sub> P <sub>4</sub> , O <sub>3</sub> PbZn, O <sub>3</sub> SnZn, O <sub>3</sub> TiZn, O <sub>5</sub> P <sub>2</sub> , Pd <sub>8</sub> Sb <sub>3</sub> , Si <sub>38</sub> Te <sub>16</sub> ,                                                                                                                                                                                                                                                                                                                                                                                                                                                                                                                                                                                                                                                                                                                                                                                                                                                             |
| 162 | As <sub>2</sub> CdO <sub>6</sub> , As <sub>2</sub> HgO <sub>6</sub> , As <sub>2</sub> Hg <sub>2</sub> O <sub>6</sub> , As <sub>2</sub> O <sub>6</sub> Sr, Au <sub>7</sub> IP <sub>10</sub> , BaO <sub>6</sub> Sb <sub>2</sub> , BiI <sub>3</sub> , CdO <sub>6</sub> Sb <sub>2</sub> , Cl <sub>3</sub> Ti, Cl <sub>4</sub> Mo, F <sub>6</sub> HfLi <sub>2</sub> ,                                                                                                                                                                                                                                                                                                                                                                                                                                                                                                                                                                                                                                                                                                                                                                                                                                                                                                                                                                                                                                                                                                                                                                                                                                                                                                                                                                                                                                                                                                                                                                           |

Part 18 of all the predicted materials with band crossings from **Cases 1** or **2**:

|     |                                                                                                                                                                                                                                                                                                                                                                                                                                                                                                                                                                                                                                                                                                                                                                                                                                                                                                                                                                                                                                                                                                                                                                                                                                                                                                                                                                                                                                                                                                                                                                                                                                                                                                                                                                                                                                                                                                                                                                                                                                                                                                                                                                                                                                                                                                                                                                                                                                                                                                                                                                                                                                                                                                                                                                                                                                                                                                                                                                                                                                                                                                                                                                                                                                                                                                                                                                                                                                                                                                                                                                                                                                                                                                                                                                                                                                                                                                                                                                                                                                                                                                                                                                                                                                                                                                                                                                                                                                                                                                                                                                                                                                                                                                                                                                                                                                                                                                                                                                                                                                                                                                                                                                                                                                                                                                                                                                                                                                                                                                                                                                                                                                                                                                                                                                  |
|-----|------------------------------------------------------------------------------------------------------------------------------------------------------------------------------------------------------------------------------------------------------------------------------------------------------------------------------------------------------------------------------------------------------------------------------------------------------------------------------------------------------------------------------------------------------------------------------------------------------------------------------------------------------------------------------------------------------------------------------------------------------------------------------------------------------------------------------------------------------------------------------------------------------------------------------------------------------------------------------------------------------------------------------------------------------------------------------------------------------------------------------------------------------------------------------------------------------------------------------------------------------------------------------------------------------------------------------------------------------------------------------------------------------------------------------------------------------------------------------------------------------------------------------------------------------------------------------------------------------------------------------------------------------------------------------------------------------------------------------------------------------------------------------------------------------------------------------------------------------------------------------------------------------------------------------------------------------------------------------------------------------------------------------------------------------------------------------------------------------------------------------------------------------------------------------------------------------------------------------------------------------------------------------------------------------------------------------------------------------------------------------------------------------------------------------------------------------------------------------------------------------------------------------------------------------------------------------------------------------------------------------------------------------------------------------------------------------------------------------------------------------------------------------------------------------------------------------------------------------------------------------------------------------------------------------------------------------------------------------------------------------------------------------------------------------------------------------------------------------------------------------------------------------------------------------------------------------------------------------------------------------------------------------------------------------------------------------------------------------------------------------------------------------------------------------------------------------------------------------------------------------------------------------------------------------------------------------------------------------------------------------------------------------------------------------------------------------------------------------------------------------------------------------------------------------------------------------------------------------------------------------------------------------------------------------------------------------------------------------------------------------------------------------------------------------------------------------------------------------------------------------------------------------------------------------------------------------------------------------------------------------------------------------------------------------------------------------------------------------------------------------------------------------------------------------------------------------------------------------------------------------------------------------------------------------------------------------------------------------------------------------------------------------------------------------------------------------------------------------------------------------------------------------------------------------------------------------------------------------------------------------------------------------------------------------------------------------------------------------------------------------------------------------------------------------------------------------------------------------------------------------------------------------------------------------------------------------------------------------------------------------------------------------------------------------------------------------------------------------------------------------------------------------------------------------------------------------------------------------------------------------------------------------------------------------------------------------------------------------------------------------------------------------------------------------------------------------------------------------------------------------------------|
| 162 | F <sub>6</sub> Li <sub>2</sub> Zr, In <sub>4</sub> O <sub>7</sub> Rb <sub>2</sub> , K <sub>2</sub> Mg <sub>2</sub> O <sub>7</sub> Si <sub>2</sub> , O <sub>6</sub> PbSb <sub>2</sub> , O <sub>6</sub> Sb <sub>2</sub> Sr, O <sub>8</sub> Ta <sub>2</sub> U,                                                                                                                                                                                                                                                                                                                                                                                                                                                                                                                                                                                                                                                                                                                                                                                                                                                                                                                                                                                                                                                                                                                                                                                                                                                                                                                                                                                                                                                                                                                                                                                                                                                                                                                                                                                                                                                                                                                                                                                                                                                                                                                                                                                                                                                                                                                                                                                                                                                                                                                                                                                                                                                                                                                                                                                                                                                                                                                                                                                                                                                                                                                                                                                                                                                                                                                                                                                                                                                                                                                                                                                                                                                                                                                                                                                                                                                                                                                                                                                                                                                                                                                                                                                                                                                                                                                                                                                                                                                                                                                                                                                                                                                                                                                                                                                                                                                                                                                                                                                                                                                                                                                                                                                                                                                                                                                                                                                                                                                                                                      |
| 163 | AgGaP <sub>2</sub> Se <sub>6</sub> , AgInP <sub>2</sub> Se <sub>6</sub> , AgP <sub>2</sub> S <sub>6</sub> Sc, AgP <sub>2</sub> ScSe <sub>6</sub> , Ag <sub>5</sub> HgO <sub>6</sub> Sb, AlCaF <sub>6</sub> Li, AlF <sub>6</sub> LiSr, Al <sub>2</sub> B <sub>2</sub> Na <sub>2</sub> O <sub>7</sub> , Br <sub>6</sub> Na <sub>3</sub> Sc, CaF <sub>6</sub> GaLi, Cl <sub>18</sub> CsLuNb <sub>6</sub> , Cl <sub>6</sub> InNa <sub>3</sub> , Cs <sub>2</sub> I <sub>14</sub> Mo <sub>6</sub> , GeNa <sub>2</sub> O <sub>6</sub> Te, I <sub>6</sub> Li <sub>2</sub> U, I <sub>6</sub> PbTh, I <sub>6</sub> SnTh, O <sub>2</sub> Si, O <sub>3</sub> SbTl, Pt <sub>3</sub> Tl <sub>2</sub> ,                                                                                                                                                                                                                                                                                                                                                                                                                                                                                                                                                                                                                                                                                                                                                                                                                                                                                                                                                                                                                                                                                                                                                                                                                                                                                                                                                                                                                                                                                                                                                                                                                                                                                                                                                                                                                                                                                                                                                                                                                                                                                                                                                                                                                                                                                                                                                                                                                                                                                                                                                                                                                                                                                                                                                                                                                                                                                                                                                                                                                                                                                                                                                                                                                                                                                                                                                                                                                                                                                                                                                                                                                                                                                                                                                                                                                                                                                                                                                                                                                                                                                                                                                                                                                                                                                                                                                                                                                                                                                                                                                                                                                                                                                                                                                                                                                                                                                                                                                                                                                                                                         |
| 164 | Ac <sub>2</sub> O <sub>3</sub> , AgBiS <sub>2</sub> , AgBiSe <sub>2</sub> , AgScSe <sub>2</sub> , Ag <sub>2</sub> BaS <sub>2</sub> , AlCsMo <sub>2</sub> O <sub>8</sub> , AlLaSi <sub>2</sub> , AlMo <sub>2</sub> O <sub>8</sub> Tl, Al <sub>2</sub> CaGe <sub>2</sub> , Al <sub>2</sub> CaSi <sub>2</sub> , Al <sub>2</sub> Cs <sub>2</sub> O <sub>7</sub> Sb <sub>2</sub> , Al <sub>2</sub> Ge <sub>2</sub> Sr, Al <sub>2</sub> K <sub>2</sub> O <sub>7</sub> Sb <sub>2</sub> , Al <sub>2</sub> MgSi <sub>2</sub> , Al <sub>2</sub> Mg <sub>2</sub> Se <sub>5</sub> , Al <sub>2</sub> O <sub>7</sub> Rb <sub>2</sub> Sb <sub>2</sub> , Al <sub>2</sub> Si <sub>2</sub> Sr, As <sub>2</sub> BaCd <sub>2</sub> , As <sub>2</sub> BaMg <sub>2</sub> , As <sub>2</sub> Be <sub>2</sub> Ca, As <sub>2</sub> Be <sub>2</sub> Mg, As <sub>2</sub> CaCd <sub>2</sub> , As <sub>2</sub> CaMg <sub>2</sub> , As <sub>2</sub> CaZn <sub>2</sub> , As <sub>2</sub> Cd <sub>2</sub> Sr, As <sub>2</sub> Ge <sub>2</sub> Te <sub>5</sub> , As <sub>2</sub> LaLi <sub>3</sub> , As <sub>2</sub> Mg <sub>2</sub> Sr, As <sub>2</sub> Mg <sub>2</sub> Zn, As <sub>2</sub> Mg <sub>3</sub> , As <sub>2</sub> SrZn <sub>2</sub> , Au <sub>3</sub> Cs <sub>2</sub> , Au <sub>3</sub> Cs <sub>2</sub> , Au <sub>3</sub> RbSe <sub>2</sub> , BN, BaBi <sub>2</sub> Mg <sub>2</sub> , BaCd <sub>2</sub> P <sub>2</sub> , BaCd <sub>2</sub> Sb <sub>2</sub> , BaMgO <sub>8</sub> Si <sub>2</sub> Sr <sub>2</sub> , BaMg <sub>2</sub> P <sub>2</sub> , BaMg <sub>2</sub> Sb <sub>2</sub> , BaSn <sub>2</sub> , Ba <sub>3</sub> MgO <sub>9</sub> Ta <sub>2</sub> , Ba <sub>3</sub> Nb <sub>2</sub> O <sub>9</sub> Zn, Ba <sub>3</sub> O <sub>9</sub> SrTa <sub>2</sub> , Ba <sub>5</sub> Nb <sub>4</sub> O <sub>15</sub> , Be, Be <sub>2</sub> CaP <sub>2</sub> , Be <sub>2</sub> MgN <sub>2</sub> , Be <sub>2</sub> MgP <sub>2</sub> , Be <sub>3</sub> N <sub>2</sub> , Bi <sub>2</sub> Br <sub>9</sub> Cs <sub>3</sub> , Bi <sub>2</sub> CaMg <sub>2</sub> , Bi <sub>2</sub> LaLi <sub>3</sub> , Bi <sub>2</sub> Li <sub>3</sub> Y, Bi <sub>2</sub> Mg <sub>2</sub> Sr, Bi <sub>2</sub> Mg <sub>3</sub> , Bi <sub>2</sub> Pb <sub>2</sub> Se <sub>5</sub> , BrNZr, Br <sub>2</sub> Ti, Br <sub>6</sub> Na <sub>2</sub> U, Br <sub>9</sub> Cs <sub>3</sub> Sb <sub>2</sub> , CN <sub>2</sub> O <sub>2</sub> Y <sub>2</sub> , CNb <sub>2</sub> S <sub>2</sub> , CS <sub>2</sub> Ta <sub>2</sub> , C <sub>2</sub> Al <sub>2</sub> Mg, C <sub>2</sub> Na <sub>2</sub> Pd, C <sub>2</sub> Na <sub>2</sub> Pt, C <sub>8</sub> B <sub>2</sub> N <sub>8</sub> Zn, CaCd <sub>2</sub> P <sub>2</sub> , CaCd <sub>2</sub> Sb <sub>2</sub> , CaGe <sub>2</sub> , CaI <sub>2</sub> , CaMg <sub>2</sub> N <sub>2</sub> , CaMg <sub>2</sub> Sb <sub>2</sub> , CaP <sub>2</sub> Zn <sub>2</sub> , CaSi <sub>2</sub> , Ca <sub>2</sub> GeO <sub>4</sub> , Ca <sub>2</sub> O <sub>4</sub> Si, Ca <sub>3</sub> N <sub>2</sub> , CdI <sub>2</sub> , CdO <sub>4</sub> S, Cd <sub>2</sub> P <sub>2</sub> Sr, Cd <sub>2</sub> Sb <sub>2</sub> Sr, ClNZr, Cl <sub>2</sub> Mg, Cl <sub>6</sub> Cs <sub>2</sub> Th, Cl <sub>6</sub> Cs <sub>2</sub> U, Cl <sub>6</sub> Na <sub>2</sub> U, Cl <sub>6</sub> U, Cl <sub>9</sub> Cs <sub>3</sub> Sb <sub>2</sub> , Cs <sub>2</sub> F <sub>6</sub> Hf, Cs <sub>2</sub> F <sub>6</sub> Pt, Cs <sub>2</sub> F <sub>6</sub> Sn, Cs <sub>2</sub> F <sub>6</sub> Zr, Cs <sub>3</sub> I <sub>9</sub> Sb <sub>2</sub> , F <sub>3</sub> OP, F <sub>6</sub> GeNa <sub>2</sub> , F <sub>6</sub> Hg <sub>3</sub> S <sub>2</sub> Si, F <sub>6</sub> K <sub>2</sub> Pt, F <sub>6</sub> K <sub>2</sub> Ti, F <sub>6</sub> Na <sub>2</sub> Si, F <sub>6</sub> Na <sub>2</sub> Ti, F <sub>6</sub> PtRb <sub>2</sub> , F <sub>6</sub> Rb <sub>2</sub> Zr, F <sub>6</sub> S, F <sub>6</sub> SnTl <sub>2</sub> , F <sub>6</sub> Ti <sub>2</sub> Tl <sub>2</sub> , Ga <sub>2</sub> I <sub>2</sub> Y <sub>2</sub> , GeI <sub>2</sub> , GeI <sub>2</sub> La <sub>2</sub> , GeSb <sub>4</sub> Te <sub>7</sub> , Ge <sub>2</sub> Sr, HfS <sub>2</sub> , HfSe <sub>2</sub> , Hf <sub>2</sub> N <sub>2</sub> S, HgPt <sub>2</sub> Se <sub>3</sub> , I <sub>2</sub> Mg, I <sub>2</sub> Zn, In <sub>2</sub> Se <sub>3</sub> , KMo <sub>2</sub> O <sub>8</sub> Sc, K <sub>2</sub> Li <sub>4</sub> O <sub>6</sub> U, K <sub>3</sub> NaO <sub>8</sub> Se <sub>2</sub> , K <sub>4</sub> O <sub>12</sub> Zr <sub>5</sub> , LaLi <sub>3</sub> P <sub>2</sub> , LaLi <sub>3</sub> Sb <sub>2</sub> , La <sub>2</sub> O <sub>2</sub> Se, La <sub>2</sub> O <sub>3</sub> , Li <sub>2</sub> N <sub>2</sub> Zr, Li <sub>2</sub> SiZn, Lu <sub>2</sub> O <sub>2</sub> S, Lu <sub>2</sub> O <sub>3</sub> , Mg <sub>2</sub> N <sub>2</sub> Sr, Mg <sub>2</sub> Sb <sub>2</sub> Sr, Mg <sub>3</sub> Sb <sub>2</sub> , MoO <sub>4</sub> Tl <sub>2</sub> , Mo <sub>2</sub> O <sub>8</sub> ScTl, N <sub>2</sub> SZr <sub>2</sub> , N <sub>2</sub> SeTh <sub>2</sub> , NaO <sub>6</sub> S <sub>2</sub> Tl <sub>3</sub> , NaO <sub>8</sub> Rb <sub>3</sub> W <sub>2</sub> , O <sub>2</sub> Pt, O <sub>2</sub> SY <sub>2</sub> , O <sub>3</sub> Sc <sub>2</sub> , O <sub>3</sub> U, O <sub>3</sub> Y <sub>2</sub> , P <sub>2</sub> SrZn <sub>2</sub> , PdTe <sub>2</sub> , Pd <sub>4</sub> Se <sub>6</sub> Tl <sub>2</sub> , PtSe <sub>2</sub> , PtTe <sub>2</sub> , Pt <sub>3</sub> U, Pt <sub>4</sub> S <sub>6</sub> Tl <sub>2</sub> , Pt <sub>4</sub> Se <sub>6</sub> Tl <sub>2</sub> , Pt <sub>4</sub> Te <sub>6</sub> Tl <sub>2</sub> , S <sub>2</sub> Sn, S <sub>2</sub> Ti, S <sub>2</sub> Zr, Sb <sub>2</sub> Te, Se <sub>2</sub> Sn, Se <sub>2</sub> Zr, Te <sub>2</sub> Ti, Te <sub>6</sub> Zr <sub>5</sub> , |
| 165 | Al <sub>2</sub> O <sub>8</sub> Si <sub>2</sub> Sr, Ba <sub>3</sub> Bi <sub>2</sub> O <sub>9</sub> Te, F <sub>18</sub> InSb <sub>3</sub> , F <sub>3</sub> La, F <sub>3</sub> Y, F <sub>6</sub> Li <sub>3</sub> Sc, Ge <sub>3</sub> O <sub>9</sub> Rb <sub>2</sub> Ti, InKO <sub>8</sub> W <sub>2</sub> , InLi <sub>3</sub> O <sub>3</sub> , LiTe <sub>3</sub> , Mg <sub>4</sub> Nb <sub>2</sub> O <sub>9</sub> , Mg <sub>4</sub> O <sub>9</sub> Ta <sub>2</sub> , NaTe <sub>3</sub> , Nb <sub>2</sub> O <sub>9</sub> Zn <sub>4</sub> ,                                                                                                                                                                                                                                                                                                                                                                                                                                                                                                                                                                                                                                                                                                                                                                                                                                                                                                                                                                                                                                                                                                                                                                                                                                                                                                                                                                                                                                                                                                                                                                                                                                                                                                                                                                                                                                                                                                                                                                                                                                                                                                                                                                                                                                                                                                                                                                                                                                                                                                                                                                                                                                                                                                                                                                                                                                                                                                                                                                                                                                                                                                                                                                                                                                                                                                                                                                                                                                                                                                                                                                                                                                                                                                                                                                                                                                                                                                                                                                                                                                                                                                                                                                                                                                                                                                                                                                                                                                                                                                                                                                                                                                                                                                                                                                                                                                                                                                                                                                                                                                                                                                                                                                                                                            |
| 166 | AgAsSe <sub>2</sub> , AgBiSe <sub>2</sub> , AgBiTe <sub>2</sub> , AgGeLi <sub>2</sub> , AgInO <sub>2</sub> , AgInS <sub>2</sub> , AgLuO <sub>2</sub> , AgO <sub>2</sub> Sc, AgSbTe <sub>2</sub> , Ag <sub>3</sub> As <sub>2</sub> K <sub>3</sub> , AlCaF <sub>14</sub> Mg <sub>3</sub> Na <sub>3</sub> , AlCs <sub>2</sub> F <sub>6</sub> Na, AlF <sub>6</sub> K <sub>2</sub> Li, AlLaO <sub>3</sub> , AlLiO <sub>2</sub> , AlNaO <sub>2</sub> , AlO <sub>2</sub> Tl, Al <sub>2</sub> MgS <sub>4</sub> , Al <sub>3</sub> Cs <sub>2</sub> F <sub>12</sub> Na, As, AsB <sub>6</sub> , AsCa <sub>2</sub> I, AsF <sub>6</sub> K, AsNaTe <sub>2</sub> Zr <sub>2</sub> , As <sub>2</sub> B <sub>12</sub> , As <sub>2</sub> Ba <sub>3</sub> O <sub>8</sub> , As <sub>2</sub> BeK <sub>4</sub> , As <sub>2</sub> CaGa <sub>2</sub> , As <sub>2</sub> CdK <sub>4</sub> , As <sub>2</sub> GeTe <sub>4</sub> , As <sub>2</sub> HgK <sub>4</sub> , As <sub>2</sub> K <sub>4</sub> Zn, As <sub>2</sub> Te <sub>3</sub> , As <sub>3</sub> Cd <sub>4</sub> K, AuF <sub>6</sub> K, Au <sub>3</sub> K <sub>3</sub> Sb <sub>2</sub> , Au <sub>3</sub> Rb <sub>3</sub> Sb <sub>2</sub> , B, B <sub>12</sub> , B <sub>12</sub> P <sub>2</sub> , B <sub>12</sub> S, B <sub>12</sub> Si <sub>3</sub> , BS <sub>2</sub> Tl, B <sub>2</sub> Ba <sub>2</sub> MgO <sub>6</sub> , B <sub>2</sub> Mo, B <sub>4</sub> Mo <sub>2</sub> , B <sub>6</sub> O, B <sub>6</sub> P, B <sub>9</sub> MgN, BaF <sub>6</sub> Ge, BaF <sub>6</sub> Pb, BaF <sub>6</sub> Ti, BaGe <sub>2</sub> Li <sub>2</sub> Mg <sub>2</sub> , BaHgO <sub>2</sub> , BaLi <sub>2</sub> Mg <sub>2</sub> Si <sub>2</sub> , BaO <sub>3</sub> Si, Ba <sub>2</sub> BrN, Ba <sub>2</sub> CIN, Ba <sub>2</sub> CIP, Ba <sub>2</sub> FN, Ba <sub>2</sub> Mg <sub>17</sub> , Ba <sub>3</sub> Nb <sub>2</sub> O <sub>8</sub> , Ba <sub>3</sub> O <sub>9</sub> Sc <sub>4</sub> , Ba <sub>8</sub> O <sub>24</sub> Re <sub>2</sub> W <sub>3</sub> , BeK <sub>4</sub> P <sub>2</sub> , Be <sub>2</sub> F <sub>8</sub> K <sub>2</sub> Pb, Be <sub>2</sub> F <sub>8</sub> K <sub>2</sub> Sr, Bi, BiKLi <sub>6</sub> O <sub>6</sub> , BiRbS <sub>2</sub> , BiS <sub>2</sub> Tl, BiSe <sub>2</sub> Tl, BiTe <sub>2</sub> Tl, Bi <sub>2</sub> Se <sub>2</sub> Te, BrCa <sub>2</sub> N, BrHfN, BrLa, BrNSr <sub>2</sub> , BrNZr, Br <sub>2</sub> Ca <sub>3</sub> Si, Br <sub>2</sub> Cd, Br <sub>2</sub> Zn, Br <sub>7</sub> In <sub>4</sub> , C, CaIOsc, CB <sub>4</sub> , CCl <sub>2</sub> Lu <sub>2</sub> , CMgN <sub>2</sub> , CS <sub>14</sub> , CS <sub>2</sub> Ta <sub>2</sub> , CY <sub>2</sub> , C <sub>2</sub> Ca, C <sub>2</sub> CaK <sub>2</sub> O <sub>6</sub> , C <sub>2</sub> K <sub>2</sub> MgO <sub>6</sub> , C <sub>3</sub> Al <sub>4</sub> , C <sub>3</sub> B <sub>12</sub> , C <sub>5</sub> Ti <sub>8</sub> , C <sub>6</sub> Al <sub>4</sub> Hf <sub>3</sub> , CaF <sub>6</sub> Ti, CaGe <sub>2</sub> , CaHgO <sub>2</sub> , CaO <sub>4</sub> U, CaSi <sub>2</sub> , Ca <sub>2</sub> CIN, Ca <sub>2</sub> F <sub>4</sub> , Ca <sub>2</sub> IP, Ca <sub>2</sub> O <sub>8</sub> Pt <sub>3</sub> , CdCl <sub>2</sub> , CdNa <sub>4</sub> P <sub>2</sub> , CdO <sub>4</sub> U, CIHN, CILa, CILi <sub>4</sub> N, CIMg <sub>2</sub> N, CINSr <sub>2</sub> , CINZr, CIOY, ClSc, ClY, Cl <sub>2</sub> CsI, Cl <sub>2</sub> CsKO <sub>8</sub> ,                                                                                                                                                                                                                                                                                                                                                                                                                                                                                                                                                                                                                                                                                                                                                                                                                                                                                                                                                                                                                                                                                                                                                                                                                                                                                                                                                                                                                                                                                                                                                                                                                                                                                                                                                                                                                                                                                                                                                                                                                                                                                                                                                                                                                                                                                                                                                                                     |



Part 19 of all the predicted materials with band crossings from **Cases 1** or **2**:

|     |                                                                                                                                                                                                                                                                                                                                                                                                                                                                                                                                                                                                                                                                                                                                                                                                                                                                                                                                                                                                                                                                                                                                                                                                                                                                                                                                                                                                                                                                                                                                                                                                                                                                                                                                                                                                                                                                                                                                                                                                                                                                                                                                                                                                                                                                                                                                                                                                                                                                                                                                                                                                                                                                                                                                                                                                                                                                                                                                                                                                                                                                                                                                                                                                                                                                                                                                                                                                                                                                                                                                                                                                                                                                                                                                                                                                                                                                                    |
|-----|------------------------------------------------------------------------------------------------------------------------------------------------------------------------------------------------------------------------------------------------------------------------------------------------------------------------------------------------------------------------------------------------------------------------------------------------------------------------------------------------------------------------------------------------------------------------------------------------------------------------------------------------------------------------------------------------------------------------------------------------------------------------------------------------------------------------------------------------------------------------------------------------------------------------------------------------------------------------------------------------------------------------------------------------------------------------------------------------------------------------------------------------------------------------------------------------------------------------------------------------------------------------------------------------------------------------------------------------------------------------------------------------------------------------------------------------------------------------------------------------------------------------------------------------------------------------------------------------------------------------------------------------------------------------------------------------------------------------------------------------------------------------------------------------------------------------------------------------------------------------------------------------------------------------------------------------------------------------------------------------------------------------------------------------------------------------------------------------------------------------------------------------------------------------------------------------------------------------------------------------------------------------------------------------------------------------------------------------------------------------------------------------------------------------------------------------------------------------------------------------------------------------------------------------------------------------------------------------------------------------------------------------------------------------------------------------------------------------------------------------------------------------------------------------------------------------------------------------------------------------------------------------------------------------------------------------------------------------------------------------------------------------------------------------------------------------------------------------------------------------------------------------------------------------------------------------------------------------------------------------------------------------------------------------------------------------------------------------------------------------------------------------------------------------------------------------------------------------------------------------------------------------------------------------------------------------------------------------------------------------------------------------------------------------------------------------------------------------------------------------------------------------------------------------------------------------------------------------------------------------------------|
| 166 | <p>Cl<sub>2</sub>Li<sub>5</sub>N, Cl<sub>2</sub>Mg, Cl<sub>2</sub>Pt, Cl<sub>3</sub>Re, Cl<sub>8</sub>Na<sub>2</sub>Ti<sub>3</sub>, Cl<sub>9</sub>Re<sub>3</sub>, CsLaS<sub>2</sub>, CsLuS<sub>2</sub>, Cs<sub>2</sub>F<sub>6</sub>GaNa, Cs<sub>2</sub>F<sub>6</sub>NaTi, Cs<sub>2</sub>O, Cs<sub>2</sub>O<sub>12</sub>Te<sub>4</sub>, Cs<sub>2</sub>Pt<sub>4</sub>Se<sub>6</sub>, Cs<sub>4</sub>F<sub>12</sub>Ga<sub>2</sub>KLi, FLaO, FLuS, FNTh, FOY, F<sub>2</sub>O<sub>2</sub>U, F<sub>6</sub>GaLiRb<sub>2</sub>, F<sub>6</sub>PbPt, F<sub>6</sub>SbTl, Ga, GaGeTe, GaLiO<sub>2</sub>, GaO<sub>2</sub>Tl, GaP, GaS, GeI<sub>2</sub>La<sub>2</sub>, GeI<sub>2</sub>Y<sub>2</sub>, HfIn, HfN<sub>2</sub>Sr, Hg, HgK<sub>4</sub>P<sub>2</sub>, HgNa<sub>4</sub>P<sub>2</sub>, HgO<sub>2</sub>Sr, INSr<sub>2</sub>, INZr, I<sub>2</sub>La<sub>2</sub>Te, I<sub>2</sub>Zn, I<sub>8</sub>Nb<sub>3</sub>, InKO<sub>2</sub>, InK<sub>5</sub>Pb<sub>8</sub>, InLiSe<sub>2</sub>, InMg<sub>3</sub>, InNaS<sub>2</sub>, InNaSe<sub>2</sub>, InP<sub>3</sub>, InS<sub>2</sub>Tl, In<sub>2</sub>Te<sub>3</sub>, KLaO<sub>2</sub>, KLaS<sub>2</sub>, KLaTe<sub>2</sub>, KLi<sub>6</sub>O<sub>6</sub>Ta, KLuS<sub>2</sub>, KO<sub>2</sub>Sc, KO<sub>2</sub>Tl, KO<sub>2</sub>Y, KO<sub>3</sub>Pd<sub>2</sub>, KS<sub>2</sub>Y, KTe<sub>2</sub>Y, K<sub>2</sub>O<sub>3</sub>Sn<sub>2</sub>, K<sub>2</sub>O<sub>8</sub>PbS<sub>2</sub>, K<sub>2</sub>Pt<sub>4</sub>S<sub>6</sub>, K<sub>2</sub>Pt<sub>4</sub>Se<sub>6</sub>, K<sub>4</sub>P<sub>2</sub>Zn, LaNaSe<sub>2</sub>, LaO<sub>12</sub>Sb<sub>5</sub>, LaO<sub>2</sub>Rb, LaRbS<sub>2</sub>, LaRbSe<sub>2</sub>, LiS<sub>2</sub>Sc, LiS<sub>2</sub>Y, LiSe<sub>2</sub>Y, Li<sub>2</sub>O, Li<sub>4</sub>Mo<sub>3</sub>O<sub>8</sub>, Li<sub>4</sub>P<sub>2</sub>Sr, Li<sub>6</sub>O<sub>6</sub>U, Li<sub>8</sub>Pb<sub>3</sub>, LuNaS<sub>2</sub>, LuO<sub>2</sub>Rb, LuRbS<sub>2</sub>, LuRbSe<sub>2</sub>, LuS<sub>2</sub>Tl, LuSe<sub>2</sub>Tl, LuTe<sub>2</sub>Tl, MgN<sub>2</sub>Si, MgO, N<sub>2</sub>NaNb, N<sub>2</sub>NaTa, N<sub>2</sub>SrZr, N<sub>2</sub>W, N<sub>3</sub>Na, N<sub>4</sub>Th<sub>3</sub>, NaO<sub>2</sub>Sc, NaO<sub>2</sub>Tl, NaS<sub>2</sub>Sc, NaS<sub>2</sub>Y, NaSe<sub>2</sub>Y, Nb<sub>6</sub>Zn<sub>7</sub>, OPYZn, OTl<sub>2</sub>, O<sub>2</sub>, O<sub>2</sub>RbSc, O<sub>2</sub>RbTl, O<sub>2</sub>RbY, O<sub>3</sub>Rb<sub>2</sub>Sn<sub>2</sub>, O<sub>4</sub>SrU, P, Pd<sub>3</sub>S<sub>2</sub>Tl<sub>2</sub>, Pt<sub>2</sub>Te<sub>3</sub>, Pt<sub>3</sub>Te<sub>4</sub>, Pt<sub>4</sub>Rb<sub>2</sub>Se<sub>6</sub>, RbS<sub>2</sub>Y, STi, S<sub>2</sub>TlY, Sb, ScTe<sub>2</sub>Tl, SeTi, Se<sub>2</sub>TlY, Ta<sub>6</sub>Zn<sub>7</sub>, TeZr<sub>3</sub>, Te<sub>2</sub>TlY,</p>                                                                                                                                                                                                                                                                                                                                                                                                                                                                                                                                                                                                                                                                                                                                                                                                                                                                                                                                                                                                                                                                                                  |
| 167 | <p>AgHg<sub>3</sub>O<sub>6</sub>Sb, AgO<sub>3</sub>Ta, Ag<sub>2</sub>Nb<sub>4</sub>O<sub>11</sub>, Ag<sub>2</sub>O<sub>11</sub>Ta<sub>4</sub>, Ag<sub>5</sub>IO<sub>6</sub>, AlBO<sub>3</sub>, AlF<sub>3</sub>, Al<sub>2</sub>B<sub>2</sub>CaO<sub>7</sub>, Al<sub>2</sub>O<sub>3</sub>, Al<sub>3</sub>As<sub>5</sub>Ba<sub>3</sub>, Al<sub>3</sub>Ba<sub>3</sub>P<sub>5</sub>, Al<sub>3</sub>Bi<sub>5</sub>Br<sub>12</sub>, Al<sub>3</sub>Bi<sub>5</sub>Cl<sub>12</sub>, Al<sub>6</sub>Ge<sub>5</sub>, As<sub>3</sub>CsO<sub>12</sub>Zr<sub>2</sub>, As<sub>3</sub>KO<sub>12</sub>Zr<sub>2</sub>, As<sub>3</sub>LiO<sub>12</sub>Zr<sub>2</sub>, As<sub>3</sub>NaO<sub>12</sub>Ti<sub>2</sub>, As<sub>3</sub>NaO<sub>12</sub>Zr<sub>2</sub>, AuK<sub>3</sub>Se<sub>2</sub>, AuNa<sub>3</sub>S<sub>2</sub>, Au<sub>3</sub>F<sub>12</sub>La, BBe<sub>2</sub>F<sub>2</sub>KO<sub>3</sub>, BGaO<sub>3</sub>, BInO<sub>3</sub>, BNaO<sub>2</sub>, BO<sub>3</sub>Sc, B<sub>2</sub>Ca<sub>3</sub>O<sub>6</sub>, B<sub>2</sub>Hg<sub>3</sub>O<sub>6</sub>, B<sub>3</sub>K<sub>3</sub>O<sub>6</sub>, B<sub>3</sub>K<sub>3</sub>S<sub>6</sub>, B<sub>3</sub>Na<sub>3</sub>O<sub>6</sub>, B<sub>3</sub>Na<sub>3</sub>S<sub>6</sub>, B<sub>3</sub>Rb<sub>3</sub>S<sub>6</sub>, Ba<sub>2</sub>Re<sub>6</sub>S<sub>11</sub>, Ba<sub>3</sub>BeCl<sub>18</sub>Zr<sub>6</sub>, Ba<sub>3</sub>BiNaO<sub>6</sub>, Ba<sub>3</sub>Ga<sub>3</sub>P<sub>5</sub>, Ba<sub>3</sub>NaNbO<sub>6</sub>, Ba<sub>3</sub>NaO<sub>6</sub>Sb, Ba<sub>3</sub>NaO<sub>6</sub>Ta, Ba<sub>3</sub>O<sub>9</sub>W<sub>2</sub>, Ba<sub>4</sub>O<sub>6</sub>Pt, Ba<sub>6</sub>O<sub>18</sub>W<sub>4</sub>, BiNaO<sub>6</sub>Sr<sub>3</sub>, Bi<sub>5</sub>Cl<sub>12</sub>Ga<sub>3</sub>, Br<sub>4</sub>ORB<sub>6</sub>, Br<sub>6</sub>CdRb<sub>4</sub>, Br<sub>6</sub>Cs<sub>4</sub>Pb, Br<sub>6</sub>PbRb<sub>4</sub>, Br<sub>9</sub>Cs<sub>3</sub>Y<sub>2</sub>, CCdO<sub>3</sub>, CMgO<sub>3</sub>, CO<sub>2</sub>, CO<sub>3</sub>Zn, C<sub>4</sub>K<sub>2</sub>N<sub>4</sub>Zn, Ca<sub>14</sub>Si<sub>19</sub>, Ca<sub>3</sub>N<sub>2</sub>, Ca<sub>4</sub>O<sub>6</sub>Pd, Ca<sub>4</sub>O<sub>6</sub>Pt, CdCl<sub>6</sub>K<sub>4</sub>, CdCl<sub>6</sub>Rb<sub>4</sub>, CdO<sub>6</sub>PtSr<sub>3</sub>, Cd<sub>2</sub>Mo<sub>15</sub>Se<sub>19</sub>, ClCs<sub>8</sub>Ga<sub>11</sub>, Cl<sub>4</sub>Cs<sub>6</sub>O, Cl<sub>4</sub>ORB<sub>6</sub>, Cl<sub>6</sub>Cs<sub>4</sub>Pb, Cl<sub>9</sub>Cs<sub>3</sub>In<sub>2</sub>, Cl<sub>9</sub>Cs<sub>3</sub>Lu<sub>2</sub>, Cl<sub>9</sub>Cs<sub>3</sub>Sc<sub>2</sub>, Cl<sub>9</sub>Cs<sub>3</sub>Tl<sub>2</sub>, Cl<sub>9</sub>Cs<sub>3</sub>Y<sub>2</sub>, Cl<sub>9</sub>In<sub>5</sub>, CsN<sub>3</sub>O<sub>11</sub>U, F<sub>3</sub>Ga, F<sub>3</sub>In, F<sub>3</sub>Sc, GaLaO<sub>3</sub>, Ga<sub>2</sub>O<sub>3</sub>, Ge<sub>3</sub>Hf<sub>2</sub>Na<sub>4</sub>O<sub>12</sub>, HeO<sub>2</sub>Si, In<sub>2</sub>O<sub>3</sub>, In<sub>2</sub>S<sub>3</sub>, K<sub>2</sub>O<sub>11</sub>Ta<sub>4</sub>, LiNO<sub>3</sub>, LiNbO<sub>3</sub>, LiNbO<sub>6</sub>Sr<sub>3</sub>, LiO<sub>6</sub>SbSr<sub>3</sub>, LiO<sub>6</sub>Sr<sub>3</sub>Ta, Lu<sub>2</sub>S<sub>3</sub>, MgO<sub>6</sub>PtSr<sub>3</sub>, Mo<sub>15</sub>Se<sub>19</sub>, Mo<sub>15</sub>Se<sub>19</sub>Tl<sub>2</sub>, NNaO<sub>3</sub>, N<sub>2</sub>, NaNbO<sub>6</sub>Sr<sub>3</sub>, NaO<sub>6</sub>SbSr<sub>3</sub>, NaO<sub>6</sub>Sr<sub>3</sub>Ta, Na<sub>2</sub>Nb<sub>4</sub>O<sub>11</sub>, Na<sub>2</sub>O<sub>11</sub>Ta<sub>4</sub>, Na<sub>4</sub>O<sub>12</sub>Si<sub>3</sub>Sn<sub>2</sub>, Na<sub>4</sub>O<sub>12</sub>Si<sub>3</sub>Zr<sub>2</sub>, O<sub>2</sub>Si, O<sub>3</sub>Te, O<sub>6</sub>PdSr<sub>4</sub>, O<sub>6</sub>PtSr<sub>3</sub>Zn, O<sub>6</sub>PtSr<sub>4</sub>, Pd<sub>8</sub>Sb<sub>3</sub>, Re<sub>6</sub>S<sub>11</sub>Sr<sub>2</sub>,</p> |
| 169 | <p>AlInS<sub>3</sub>, AlInSe<sub>3</sub>, AlNaO<sub>4</sub>Si, Al<sub>2</sub>S<sub>3</sub>, GaInS<sub>3</sub>, GaInSe<sub>3</sub>, In<sub>2</sub>Se<sub>3</sub>,</p>                                                                                                                                                                                                                                                                                                                                                                                                                                                                                                                                                                                                                                                                                                                                                                                                                                                                                                                                                                                                                                                                                                                                                                                                                                                                                                                                                                                                                                                                                                                                                                                                                                                                                                                                                                                                                                                                                                                                                                                                                                                                                                                                                                                                                                                                                                                                                                                                                                                                                                                                                                                                                                                                                                                                                                                                                                                                                                                                                                                                                                                                                                                                                                                                                                                                                                                                                                                                                                                                                                                                                                                                                                                                                                               |
| 170 | <p>In<sub>2</sub>Se<sub>3</sub>,</p>                                                                                                                                                                                                                                                                                                                                                                                                                                                                                                                                                                                                                                                                                                                                                                                                                                                                                                                                                                                                                                                                                                                                                                                                                                                                                                                                                                                                                                                                                                                                                                                                                                                                                                                                                                                                                                                                                                                                                                                                                                                                                                                                                                                                                                                                                                                                                                                                                                                                                                                                                                                                                                                                                                                                                                                                                                                                                                                                                                                                                                                                                                                                                                                                                                                                                                                                                                                                                                                                                                                                                                                                                                                                                                                                                                                                                                               |
| 173 | <p>AgLa<sub>3</sub>Se<sub>7</sub>Si, AgLa<sub>3</sub>Se<sub>7</sub>Sn, AlCdLa<sub>3</sub>S<sub>7</sub>, AlGeKO<sub>4</sub>, AlI<sub>3</sub>O<sub>9</sub>, AlLa<sub>3</sub>MgS<sub>7</sub>, AlLa<sub>3</sub>S<sub>7</sub>Zn, AlNaO<sub>4</sub>Si, Al<sub>2</sub>BaO<sub>4</sub>, Al<sub>2</sub>CaO<sub>4</sub>, Al<sub>2</sub>O<sub>4</sub>Sr, AsNaO<sub>4</sub>Zn, AsO<sub>4</sub>Tl<sub>3</sub>, As<sub>3</sub>ClO<sub>9</sub>Pb<sub>5</sub>, B<sub>2</sub>Bi<sub>2</sub>O<sub>7</sub>Sr, Ba<sub>4</sub>ClGe<sub>3</sub>NaS<sub>10</sub>, BeLa<sub>3</sub>S<sub>7</sub>Sc, Br<sub>3</sub>KTi, Cl<sub>14</sub>Sn<sub>2</sub>W<sub>3</sub>, Cs<sub>2</sub>I<sub>4</sub>O<sub>11</sub>, Cs<sub>2</sub>Mo<sub>3</sub>O<sub>12</sub>Se, Cs<sub>2</sub>Mo<sub>3</sub>O<sub>12</sub>Te, Cs<sub>2</sub>O<sub>12</sub>SeW<sub>3</sub>, F<sub>10</sub>NaSb<sub>3</sub>, GaI<sub>3</sub>O<sub>9</sub>, GaNaO<sub>4</sub>Si, I<sub>3</sub>InO<sub>9</sub>, I<sub>3</sub>P, KLiMoO<sub>4</sub>, LaO<sub>3</sub>Tl, N<sub>4</sub>P<sub>2</sub>Sr, N<sub>4</sub>Si<sub>3</sub>, NaS<sub>7</sub>SiY<sub>3</sub>,</p>                                                                                                                                                                                                                                                                                                                                                                                                                                                                                                                                                                                                                                                                                                                                                                                                                                                                                                                                                                                                                                                                                                                                                                                                                                                                                                                                                                                                                                                                                                                                                                                                                                                                                                                                                                                                                                                                                                                                                                                                                                                                                                                                                                                                                                                                                                                                                                                                                                                                                                                                                                                                                                                                                                                                                                              |
| 174 | <p>Ag<sub>5</sub>RbS<sub>3</sub>, BCdLiO<sub>3</sub>, Ba<sub>7</sub>Cl<sub>2</sub>F<sub>12</sub>, Br<sub>2</sub>F<sub>12</sub>Pb<sub>7</sub>, C<sub>12</sub>N<sub>16</sub>, ClLiNaO<sub>3</sub>, C<sub>6</sub>N<sub>8</sub>, Cl<sub>2</sub>F<sub>12</sub>Pb<sub>7</sub>, GaSe, Ga<sub>9</sub>O<sub>2</sub>S<sub>13</sub>Tl<sub>3</sub>, K<sub>2</sub>O<sub>9</sub>Si<sub>3</sub>Zr, Li<sub>2</sub>O<sub>2</sub>,</p>                                                                                                                                                                                                                                                                                                                                                                                                                                                                                                                                                                                                                                                                                                                                                                                                                                                                                                                                                                                                                                                                                                                                                                                                                                                                                                                                                                                                                                                                                                                                                                                                                                                                                                                                                                                                                                                                                                                                                                                                                                                                                                                                                                                                                                                                                                                                                                                                                                                                                                                                                                                                                                                                                                                                                                                                                                                                                                                                                                                                                                                                                                                                                                                                                                                                                                                                                                                                                                                               |

Part 20 of all the predicted materials with band crossings from **Cases 1** or **2**:

|            |                                                                                                                                                                                                                                                                                                                                                                                                                                                                                                                                                                                                                                                                                                                                                                                                                                                                                                                                                                                                                                                                                                                                                                                                                                                                                                                                                                                                                                                                                                                                                                                                                                                                                                                                                                                                                                                                                                                                                                                                                                                                                                                                                                                                                                                                                                                                                                                                                                                                                                                                                                                                   |
|------------|---------------------------------------------------------------------------------------------------------------------------------------------------------------------------------------------------------------------------------------------------------------------------------------------------------------------------------------------------------------------------------------------------------------------------------------------------------------------------------------------------------------------------------------------------------------------------------------------------------------------------------------------------------------------------------------------------------------------------------------------------------------------------------------------------------------------------------------------------------------------------------------------------------------------------------------------------------------------------------------------------------------------------------------------------------------------------------------------------------------------------------------------------------------------------------------------------------------------------------------------------------------------------------------------------------------------------------------------------------------------------------------------------------------------------------------------------------------------------------------------------------------------------------------------------------------------------------------------------------------------------------------------------------------------------------------------------------------------------------------------------------------------------------------------------------------------------------------------------------------------------------------------------------------------------------------------------------------------------------------------------------------------------------------------------------------------------------------------------------------------------------------------------------------------------------------------------------------------------------------------------------------------------------------------------------------------------------------------------------------------------------------------------------------------------------------------------------------------------------------------------------------------------------------------------------------------------------------------------|
| <b>176</b> | AcBr <sub>3</sub> , AcCl <sub>3</sub> , Al <sub>6</sub> B <sub>5</sub> F <sub>3</sub> O <sub>15</sub> , As <sub>3</sub> Ca <sub>2</sub> ClO <sub>12</sub> Pb <sub>3</sub> , As <sub>3</sub> ClO <sub>12</sub> Sr <sub>5</sub> , As <sub>3</sub> ClO <sub>9</sub> Pb <sub>5</sub> , As <sub>3</sub> FO <sub>12</sub> Sr <sub>5</sub> , As <sub>6</sub> Cl <sub>2</sub> O <sub>18</sub> Pb <sub>10</sub> , As <sub>6</sub> Cl <sub>2</sub> O <sub>24</sub> Pb <sub>10</sub> , BBr <sub>3</sub> , BCl <sub>3</sub> , BF <sub>3</sub> Mg <sub>3</sub> O <sub>3</sub> , BI <sub>3</sub> , Ba <sub>3</sub> Nb <sub>2</sub> O <sub>9</sub> Sr, Ba <sub>3</sub> O <sub>9</sub> SrTa <sub>2</sub> , Ba <sub>4</sub> Nb <sub>2</sub> O <sub>9</sub> , Ba <sub>4</sub> O <sub>9</sub> Ta <sub>2</sub> , Bi <sub>2</sub> Ge <sub>3</sub> O <sub>9</sub> , Bi <sub>2</sub> O <sub>9</sub> Si <sub>3</sub> , Bi <sub>2</sub> S <sub>4</sub> Sr, Br <sub>2</sub> Sn, Br <sub>3</sub> La, Br <sub>3</sub> La <sub>9</sub> Sb <sub>16</sub> , Br <sub>9</sub> K <sub>3</sub> Mo <sub>2</sub> , CCl <sub>4</sub> NOSb, C <sub>3</sub> N <sub>4</sub> , CaMg <sub>2</sub> O <sub>12</sub> S <sub>3</sub> , Ca <sub>3</sub> Ge <sub>4</sub> , CdMo <sub>3</sub> O <sub>12</sub> Th, Cl <sub>18</sub> NNaW <sub>6</sub> , Cl <sub>3</sub> La, Cl <sub>3</sub> La <sub>3</sub> O <sub>6</sub> U, Cl <sub>3</sub> La <sub>3</sub> O <sub>6</sub> W, Cl <sub>9</sub> K <sub>3</sub> Mo <sub>2</sub> , Cl <sub>9</sub> K <sub>3</sub> W <sub>2</sub> , Cs <sub>2</sub> Ge <sub>3</sub> O <sub>9</sub> Sn, Cs <sub>2</sub> Ge <sub>3</sub> O <sub>9</sub> Ti, Cs <sub>2</sub> O <sub>9</sub> Si <sub>3</sub> Zr, Cs <sub>5</sub> Mo <sub>21</sub> S <sub>23</sub> , Cs <sub>5</sub> Mo <sub>21</sub> Se <sub>23</sub> , GaN <sub>3</sub> Sr <sub>3</sub> , Ga <sub>2</sub> O <sub>9</sub> Te <sub>3</sub> , Ge <sub>3</sub> N <sub>4</sub> , Ge <sub>3</sub> O <sub>9</sub> Sb <sub>2</sub> , Ge <sub>3</sub> O <sub>9</sub> TiTi <sub>2</sub> , Ge <sub>6</sub> Na <sub>4</sub> O <sub>15</sub> Sr, K <sub>2</sub> O <sub>9</sub> Si <sub>3</sub> Sn, K <sub>2</sub> O <sub>9</sub> Si <sub>3</sub> Ti, K <sub>2</sub> O <sub>9</sub> Si <sub>3</sub> Zr, K <sub>2</sub> O <sub>9</sub> Si <sub>4</sub> , Mo <sub>15</sub> S <sub>19</sub> , Mo <sub>9</sub> Se <sub>11</sub> , N <sub>4</sub> Si <sub>3</sub> , O <sub>9</sub> Rb <sub>2</sub> Si <sub>3</sub> Sn, O <sub>9</sub> Rb <sub>2</sub> Si <sub>3</sub> Th, O <sub>9</sub> Rb <sub>2</sub> Si <sub>3</sub> Ti, O <sub>9</sub> Sc <sub>2</sub> Se <sub>3</sub> , |
| <b>178</b> | AgF <sub>3</sub> , AuF <sub>3</sub> ,                                                                                                                                                                                                                                                                                                                                                                                                                                                                                                                                                                                                                                                                                                                                                                                                                                                                                                                                                                                                                                                                                                                                                                                                                                                                                                                                                                                                                                                                                                                                                                                                                                                                                                                                                                                                                                                                                                                                                                                                                                                                                                                                                                                                                                                                                                                                                                                                                                                                                                                                                             |
| <b>180</b> | AlLiO <sub>4</sub> Si, BLaPt <sub>2</sub> , C <sub>8</sub> Cs, CaO <sub>4</sub> S, Ge <sub>2</sub> Nb, HfSn <sub>2</sub> , Hg <sub>2</sub> INaO <sub>2</sub> , O <sub>2</sub> Si, Si <sub>2</sub> W,                                                                                                                                                                                                                                                                                                                                                                                                                                                                                                                                                                                                                                                                                                                                                                                                                                                                                                                                                                                                                                                                                                                                                                                                                                                                                                                                                                                                                                                                                                                                                                                                                                                                                                                                                                                                                                                                                                                                                                                                                                                                                                                                                                                                                                                                                                                                                                                              |
| <b>181</b> | AlLiO <sub>4</sub> Si, AlO <sub>4</sub> P,                                                                                                                                                                                                                                                                                                                                                                                                                                                                                                                                                                                                                                                                                                                                                                                                                                                                                                                                                                                                                                                                                                                                                                                                                                                                                                                                                                                                                                                                                                                                                                                                                                                                                                                                                                                                                                                                                                                                                                                                                                                                                                                                                                                                                                                                                                                                                                                                                                                                                                                                                        |
| <b>182</b> | Al <sub>2</sub> BaO <sub>4</sub> , BaHgO <sub>2</sub> , CaO <sub>11</sub> Ta <sub>4</sub> , F <sub>3</sub> La, IO <sub>6</sub> RbSn, O <sub>11</sub> SrTa <sub>4</sub> , O <sub>2</sub> Si, O <sub>3</sub> SbTl,                                                                                                                                                                                                                                                                                                                                                                                                                                                                                                                                                                                                                                                                                                                                                                                                                                                                                                                                                                                                                                                                                                                                                                                                                                                                                                                                                                                                                                                                                                                                                                                                                                                                                                                                                                                                                                                                                                                                                                                                                                                                                                                                                                                                                                                                                                                                                                                  |
| <b>183</b> | Ta <sub>21</sub> Te <sub>13</sub> ,                                                                                                                                                                                                                                                                                                                                                                                                                                                                                                                                                                                                                                                                                                                                                                                                                                                                                                                                                                                                                                                                                                                                                                                                                                                                                                                                                                                                                                                                                                                                                                                                                                                                                                                                                                                                                                                                                                                                                                                                                                                                                                                                                                                                                                                                                                                                                                                                                                                                                                                                                               |
| <b>185</b> | AsCs <sub>3</sub> , AsNa <sub>3</sub> , B <sub>3</sub> Ba <sub>3</sub> O <sub>9</sub> Sc, B <sub>9</sub> Li, Ba <sub>6</sub> Nb <sub>14</sub> O <sub>47</sub> Si <sub>4</sub> , Cs <sub>3</sub> F <sub>9</sub> Ga <sub>2</sub> , F <sub>3</sub> La, GaO <sub>3</sub> Y, GeLi <sub>8</sub> O <sub>6</sub> , I <sub>3</sub> RbTi, InO <sub>3</sub> Y, Li <sub>8</sub> O <sub>6</sub> Si, Lu <sub>2</sub> S <sub>3</sub> , NNa <sub>3</sub> , O <sub>3</sub> W, Pd <sub>5</sub> Sb <sub>2</sub> ,                                                                                                                                                                                                                                                                                                                                                                                                                                                                                                                                                                                                                                                                                                                                                                                                                                                                                                                                                                                                                                                                                                                                                                                                                                                                                                                                                                                                                                                                                                                                                                                                                                                                                                                                                                                                                                                                                                                                                                                                                                                                                                    |
| <b>186</b> | AgGeLa, AlAs <sub>4</sub> Ca <sub>3</sub> Na <sub>3</sub> , AlCa <sub>3</sub> Na <sub>3</sub> Sb <sub>4</sub> , AlP, AlSb, Al <sub>4</sub> BeMgO <sub>8</sub> , AsBrHg <sub>3</sub> S <sub>4</sub> , AsBrHg <sub>3</sub> Se <sub>4</sub> , AsClHg <sub>3</sub> S <sub>4</sub> , AsHg <sub>3</sub> ISe <sub>4</sub> , As <sub>4</sub> GaN <sub>3</sub> Sr <sub>3</sub> , BN, BP, BaN <sub>7</sub> Si <sub>4</sub> Y, Ba <sub>4</sub> Br <sub>6</sub> O, Ba <sub>4</sub> Cl <sub>6</sub> O, Ba <sub>4</sub> I <sub>6</sub> O, Ba <sub>4</sub> LiNb <sub>3</sub> O <sub>12</sub> , Ba <sub>4</sub> LiO <sub>12</sub> Ta <sub>3</sub> , Ba <sub>5</sub> Li <sub>2</sub> O <sub>15</sub> W <sub>3</sub> , BeO, Be <sub>4</sub> NaO <sub>7</sub> Sb, Bi <sub>2</sub> O <sub>3</sub> , Br <sub>2</sub> Cd, Br <sub>3</sub> CdCs, Br <sub>6</sub> OSr <sub>4</sub> , C, CSi, C <sub>3</sub> Al <sub>3</sub> Sc, C <sub>3</sub> Al <sub>5</sub> N, C <sub>4</sub> Al <sub>4</sub> Si, CaGe <sub>2</sub> , CaO, CaOSZn, Ca <sub>2</sub> O <sub>4</sub> Si, Ca <sub>4</sub> Cl <sub>6</sub> O, CdI <sub>2</sub> , CdK <sub>6</sub> O <sub>4</sub> , CdO, CdS, CdSe, CdTe, ClInK <sub>6</sub> Te <sub>4</sub> , Cl <sub>3</sub> La <sub>4</sub> NS <sub>3</sub> , Cl <sub>6</sub> OSr <sub>4</sub> , F <sub>8</sub> K <sub>3</sub> Ta, GaN, GaNa <sub>3</sub> P <sub>4</sub> Sr <sub>3</sub> , GaP, GaSe, Ge <sub>8</sub> Li <sub>7</sub> Rb, HgK <sub>6</sub> S <sub>4</sub> , HgRb <sub>6</sub> S <sub>4</sub> , HgRb <sub>6</sub> Se <sub>4</sub> , ILi, I <sub>2</sub> Pb, I <sub>7</sub> Nb <sub>3</sub> Te, I <sub>7</sub> SeTa <sub>3</sub> , I <sub>7</sub> Ta <sub>3</sub> Te, InN, In <sub>2</sub> S <sub>4</sub> Zn, In <sub>2</sub> S <sub>5</sub> Zn <sub>2</sub> , KSbSn, K <sub>4</sub> O <sub>3</sub> Sb <sub>2</sub> , K <sub>6</sub> MgO <sub>4</sub> , LaMo <sub>2</sub> O <sub>5</sub> , LaN, LiMo <sub>2</sub> O <sub>8</sub> Tl <sub>3</sub> , LiSbZn, MgSe, MgTe, Mg <sub>2</sub> Mo <sub>3</sub> O <sub>8</sub> , Mo <sub>3</sub> O <sub>8</sub> Zn <sub>2</sub> , NTL, N <sub>7</sub> Si <sub>4</sub> SrY, NaPSn, Na <sub>6</sub> P <sub>4</sub> W, Na <sub>6</sub> S <sub>4</sub> Zn, O <sub>2</sub> Pt, O <sub>8</sub> SiSn <sub>6</sub> , P <sub>3</sub> Sc <sub>7</sub> , PdSnU, S <sub>2</sub> Sn, SeZn, Se <sub>2</sub> Ta, Si, TeZn,                                                                                                                                                                                                                                          |
| <b>187</b> | AsBaLi, AsKZn, AuGaHf, AuGaZr, AuLuSi, AuScSi, BN, BaLiP, BrLi <sub>10</sub> N <sub>3</sub> , Br <sub>2</sub> Ca <sub>3</sub> Si, CHf, C <sub>2</sub> AgLi, GaSe, Ga <sub>4</sub> LiY, HfN <sub>2</sub> , Hg, InNbS <sub>2</sub> , InNbSe <sub>2</sub> , InS <sub>2</sub> Tl, InSe, KSbZn, LiPSr, LuPPT, NY, N <sub>2</sub> W, NbSe <sub>2</sub> , O <sub>2</sub> RbSc, PPTy, PbS,                                                                                                                                                                                                                                                                                                                                                                                                                                                                                                                                                                                                                                                                                                                                                                                                                                                                                                                                                                                                                                                                                                                                                                                                                                                                                                                                                                                                                                                                                                                                                                                                                                                                                                                                                                                                                                                                                                                                                                                                                                                                                                                                                                                                                |
| <b>188</b> | BaGe <sub>3</sub> O <sub>9</sub> Sn, BaO <sub>9</sub> Si <sub>3</sub> Sn, BaO <sub>9</sub> Si <sub>3</sub> Ti, BaO <sub>9</sub> Si <sub>4</sub> , Be <sub>3</sub> F <sub>9</sub> KZn, BiO <sub>19</sub> Ta <sub>7</sub> , Ge <sub>3</sub> KO <sub>9</sub> Ta, Ge <sub>3</sub> NbO <sub>9</sub> Rb, Ge <sub>3</sub> O <sub>9</sub> RbTa, Ge <sub>3</sub> O <sub>9</sub> TaTl, LaO <sub>19</sub> Ta <sub>7</sub> ,                                                                                                                                                                                                                                                                                                                                                                                                                                                                                                                                                                                                                                                                                                                                                                                                                                                                                                                                                                                                                                                                                                                                                                                                                                                                                                                                                                                                                                                                                                                                                                                                                                                                                                                                                                                                                                                                                                                                                                                                                                                                                                                                                                                  |
| <b>189</b> | AgAsCa, AgCaP, AgGeSc, AgLaMg, AgLuSi, AgMgY, AgPbY, AgSiY, AlCsF <sub>4</sub> , AlMgY, AsCa, AsCs, AsLuPd, AsNaSr, AsSr, As <sub>2</sub> Sr <sub>2</sub> , AuCdLa, AuGaMg, Au <sub>2</sub> K <sub>38</sub> Na <sub>12</sub> Tl <sub>48</sub> , Au <sub>7</sub> IP <sub>10</sub> , BLiPt <sub>3</sub> , B <sub>2</sub> Ba <sub>3</sub> O <sub>12</sub> Ti <sub>3</sub> , BaBiNa, BaCl <sub>2</sub> , BaI <sub>2</sub> , BaNaP, Ba <sub>3</sub> Nb <sub>6</sub> O <sub>26</sub> Si <sub>4</sub> , Ba <sub>3</sub> O <sub>26</sub> Si <sub>4</sub> Ta <sub>6</sub> , Ba <sub>5</sub> Mg <sub>18</sub> Si <sub>13</sub> , CFMgO <sub>3</sub> Rb, CaCdGe, CaCdPb, CaCdSn, CaP, CaPbPd, Ca <sub>2</sub> P <sub>2</sub> , CsRb <sub>14</sub> Tl <sub>27</sub> , F <sub>6</sub> HfK <sub>2</sub> , F <sub>6</sub> K <sub>2</sub> Th, F <sub>6</sub> K <sub>2</sub> U, F <sub>6</sub> Rb <sub>2</sub> Th, GaLaMg, GaMgY, Ge <sub>12</sub> Mg <sub>19</sub> Sr <sub>5</sub> , GeLiY, GeO <sub>3</sub> Sr, GePdTi, Ge <sub>3</sub> La <sub>2</sub> Zn <sub>6</sub> , Ge <sub>4</sub> K <sub>6</sub> Nb <sub>6</sub> O <sub>26</sub> , InLaPt, InMgY, K <sub>2</sub> S <sub>2</sub> , K <sub>2</sub> Se <sub>2</sub> , K <sub>2</sub> Te <sub>2</sub> , K <sub>6</sub> O <sub>26</sub> Si <sub>4</sub> Ta <sub>6</sub> ,                                                                                                                                                                                                                                                                                                                                                                                                                                                                                                                                                                                                                                                                                                                                                                                                                                                                                                                                                                                                                                                                                                                                                                                                                                                                                     |

Part 21 of all the predicted materials with band crossings from **Cases 1** or **2**:

|     |                                                                                                                                                                                                                                                                                                                                                                                                                                                                                                                                                                                                                                                                                                                                                                                                                                                                                                                                                                                                                                                                                                                                                                                                                                                                                                                                                                                                                                                                                                                                                                                                                                                                                                                                                                                                                                                                                                                                                                                                                                                                                                                                                                                                                                                                                                                                                                                                                                                                                                                                                                                                                                                                                                                                                                                                                                                                                                                                                                                                                                                                                                                                                                                                                                                                                                                                                                                                                                                                                                                                                                                                                                                                                                                                                                                                                                                                                                                                                                                                                                                                                                                                                                                                                                                                                                                                                                                                                                                                                                                                                                                                                                                                                                                                                                                                                                                                                                                                                                                                                                                                                                                                                                                                                                                                                                                                                                                                                                                                                                                                                                                                                                          |
|-----|------------------------------------------------------------------------------------------------------------------------------------------------------------------------------------------------------------------------------------------------------------------------------------------------------------------------------------------------------------------------------------------------------------------------------------------------------------------------------------------------------------------------------------------------------------------------------------------------------------------------------------------------------------------------------------------------------------------------------------------------------------------------------------------------------------------------------------------------------------------------------------------------------------------------------------------------------------------------------------------------------------------------------------------------------------------------------------------------------------------------------------------------------------------------------------------------------------------------------------------------------------------------------------------------------------------------------------------------------------------------------------------------------------------------------------------------------------------------------------------------------------------------------------------------------------------------------------------------------------------------------------------------------------------------------------------------------------------------------------------------------------------------------------------------------------------------------------------------------------------------------------------------------------------------------------------------------------------------------------------------------------------------------------------------------------------------------------------------------------------------------------------------------------------------------------------------------------------------------------------------------------------------------------------------------------------------------------------------------------------------------------------------------------------------------------------------------------------------------------------------------------------------------------------------------------------------------------------------------------------------------------------------------------------------------------------------------------------------------------------------------------------------------------------------------------------------------------------------------------------------------------------------------------------------------------------------------------------------------------------------------------------------------------------------------------------------------------------------------------------------------------------------------------------------------------------------------------------------------------------------------------------------------------------------------------------------------------------------------------------------------------------------------------------------------------------------------------------------------------------------------------------------------------------------------------------------------------------------------------------------------------------------------------------------------------------------------------------------------------------------------------------------------------------------------------------------------------------------------------------------------------------------------------------------------------------------------------------------------------------------------------------------------------------------------------------------------------------------------------------------------------------------------------------------------------------------------------------------------------------------------------------------------------------------------------------------------------------------------------------------------------------------------------------------------------------------------------------------------------------------------------------------------------------------------------------------------------------------------------------------------------------------------------------------------------------------------------------------------------------------------------------------------------------------------------------------------------------------------------------------------------------------------------------------------------------------------------------------------------------------------------------------------------------------------------------------------------------------------------------------------------------------------------------------------------------------------------------------------------------------------------------------------------------------------------------------------------------------------------------------------------------------------------------------------------------------------------------------------------------------------------------------------------------------------------------------------------------------------------------------------------------|
| 189 | LaMgTi, LiSiY, Lu <sub>6</sub> MoSb <sub>2</sub> , MgTiY, NaPSr, Na <sub>2</sub> O <sub>2</sub> , Na <sub>2</sub> S <sub>2</sub> , OTi, O <sub>26</sub> Si <sub>4</sub> Sr <sub>3</sub> Ta <sub>6</sub> , O <sub>2</sub> Ti, O <sub>8</sub> U <sub>3</sub> , PSr, Pd <sub>5</sub> Th <sub>3</sub> , PtSnU, Pt <sub>5</sub> Th <sub>3</sub> , Rb <sub>2</sub> S <sub>2</sub> , Rb <sub>2</sub> Se <sub>2</sub> , Rb <sub>2</sub> Te <sub>2</sub> , Se <sub>2</sub> U,                                                                                                                                                                                                                                                                                                                                                                                                                                                                                                                                                                                                                                                                                                                                                                                                                                                                                                                                                                                                                                                                                                                                                                                                                                                                                                                                                                                                                                                                                                                                                                                                                                                                                                                                                                                                                                                                                                                                                                                                                                                                                                                                                                                                                                                                                                                                                                                                                                                                                                                                                                                                                                                                                                                                                                                                                                                                                                                                                                                                                                                                                                                                                                                                                                                                                                                                                                                                                                                                                                                                                                                                                                                                                                                                                                                                                                                                                                                                                                                                                                                                                                                                                                                                                                                                                                                                                                                                                                                                                                                                                                                                                                                                                                                                                                                                                                                                                                                                                                                                                                                                                                                                                                     |
| 190 | Ag <sub>2</sub> Al <sub>2</sub> Bi <sub>2</sub> Cl <sub>8</sub> S <sub>3</sub> , Ag <sub>2</sub> I <sub>10</sub> Tl <sub>6</sub> , Ag <sub>5</sub> KS <sub>3</sub> , Ag <sub>5</sub> RbS <sub>3</sub> , Au <sub>6</sub> K <sub>4</sub> S <sub>5</sub> , Au <sub>6</sub> Rb <sub>4</sub> S <sub>5</sub> , CCl <sub>18</sub> W <sub>6</sub> , C <sub>3</sub> K <sub>3</sub> NaO <sub>11</sub> U, F <sub>3</sub> La <sub>3</sub> O <sub>9</sub> Si <sub>3</sub> , IO <sub>7</sub> Sb <sub>5</sub> , I <sub>2</sub> K <sub>9</sub> Li <sub>3</sub> O <sub>13</sub> , K <sub>3</sub> Nb <sub>3</sub> O <sub>13</sub> Si <sub>2</sub> ,                                                                                                                                                                                                                                                                                                                                                                                                                                                                                                                                                                                                                                                                                                                                                                                                                                                                                                                                                                                                                                                                                                                                                                                                                                                                                                                                                                                                                                                                                                                                                                                                                                                                                                                                                                                                                                                                                                                                                                                                                                                                                                                                                                                                                                                                                                                                                                                                                                                                                                                                                                                                                                                                                                                                                                                                                                                                                                                                                                                                                                                                                                                                                                                                                                                                                                                                                                                                                                                                                                                                                                                                                                                                                                                                                                                                                                                                                                                                                                                                                                                                                                                                                                                                                                                                                                                                                                                                                                                                                                                                                                                                                                                                                                                                                                                                                                                                                                                                                                                                        |
| 191 | As <sub>4</sub> BrKO <sub>6</sub> , As <sub>4</sub> ClKO <sub>6</sub> , As <sub>4</sub> IKO <sub>6</sub> , B <sub>2</sub> Sr, B <sub>2</sub> Ti, B <sub>2</sub> Zr, BaSi <sub>2</sub> , BaSn <sub>5</sub> , C <sub>2</sub> Ca, CaPd <sub>5</sub> , CaSi <sub>2</sub> , CaZn <sub>5</sub> , FN <sub>3</sub> Ta <sub>2</sub> , Ga <sub>2</sub> Sr, Li <sub>2</sub> Pd, Li <sub>2</sub> Pt, Li <sub>3</sub> N, O <sub>144</sub> Si <sub>72</sub> , O <sub>3</sub> W, Pd <sub>5</sub> Sr, Si, Ti, Ti <sub>2</sub> Zr,                                                                                                                                                                                                                                                                                                                                                                                                                                                                                                                                                                                                                                                                                                                                                                                                                                                                                                                                                                                                                                                                                                                                                                                                                                                                                                                                                                                                                                                                                                                                                                                                                                                                                                                                                                                                                                                                                                                                                                                                                                                                                                                                                                                                                                                                                                                                                                                                                                                                                                                                                                                                                                                                                                                                                                                                                                                                                                                                                                                                                                                                                                                                                                                                                                                                                                                                                                                                                                                                                                                                                                                                                                                                                                                                                                                                                                                                                                                                                                                                                                                                                                                                                                                                                                                                                                                                                                                                                                                                                                                                                                                                                                                                                                                                                                                                                                                                                                                                                                                                                                                                                                                        |
| 193 | As <sub>2</sub> O <sub>6</sub> Sr, Ca <sub>10</sub> Ge <sub>3</sub> Pt <sub>7</sub> , Ca <sub>10</sub> Pt <sub>7</sub> Si <sub>3</sub> , Ca <sub>6</sub> GaN <sub>5</sub> , GaN <sub>5</sub> Sr <sub>6</sub> , Ge <sub>3</sub> Ti <sub>5</sub> , Ge <sub>3</sub> Zr <sub>5</sub> , K <sub>2</sub> O <sub>3</sub> Pb, NbSb <sub>5</sub> U <sub>3</sub> , O <sub>19</sub> Ta <sub>6</sub> Th <sub>2</sub> , O <sub>2</sub> Si, O <sub>3</sub> W, Pb <sub>3</sub> SZr <sub>5</sub> , Pb <sub>3</sub> TeZr <sub>5</sub> , Pb <sub>3</sub> Zr <sub>5</sub> , Sn <sub>3</sub> Ti <sub>5</sub> , Sn <sub>3</sub> Zr <sub>5</sub> ,                                                                                                                                                                                                                                                                                                                                                                                                                                                                                                                                                                                                                                                                                                                                                                                                                                                                                                                                                                                                                                                                                                                                                                                                                                                                                                                                                                                                                                                                                                                                                                                                                                                                                                                                                                                                                                                                                                                                                                                                                                                                                                                                                                                                                                                                                                                                                                                                                                                                                                                                                                                                                                                                                                                                                                                                                                                                                                                                                                                                                                                                                                                                                                                                                                                                                                                                                                                                                                                                                                                                                                                                                                                                                                                                                                                                                                                                                                                                                                                                                                                                                                                                                                                                                                                                                                                                                                                                                                                                                                                                                                                                                                                                                                                                                                                                                                                                                                                                                                                                              |
| 194 | AgAlO <sub>2</sub> , AgBaP, AgBaSb, AgGaO <sub>2</sub> , AgInO <sub>2</sub> , AgO <sub>2</sub> Sc, AgO <sub>2</sub> Y, AgPSr, AgSbSr, Al <sub>12</sub> O <sub>19</sub> Sr, AlAs, AlAuO <sub>2</sub> , AlBa <sub>2</sub> InO <sub>5</sub> , AlC <sub>8</sub> S <sub>6</sub> K <sub>3</sub> Sb <sub>4</sub> , AlK <sub>6</sub> Na <sub>3</sub> Sb <sub>4</sub> , ALi, AlN, AlNTi <sub>2</sub> , AlNZr <sub>2</sub> , AlN <sub>3</sub> Nb <sub>4</sub> , AlN <sub>3</sub> Ti <sub>4</sub> , AlO <sub>3</sub> Y, Al <sub>22</sub> Na <sub>2</sub> O <sub>34</sub> , Al <sub>2</sub> Hf, Ar, AsBeNa, AsF <sub>5</sub> , AsHgK, AsKZn, AsK <sub>3</sub> , AsLi <sub>3</sub> , AsNa <sub>3</sub> , AsPtY, AsRb <sub>3</sub> , As <sub>2</sub> AuK <sub>5</sub> , AuBaBi, AuCs <sub>3</sub> O, AuGaO <sub>2</sub> , AuInO <sub>2</sub> , AuK <sub>5</sub> P <sub>2</sub> , AuO <sub>2</sub> Sc, AuO <sub>2</sub> Y, BMg <sub>3</sub> N <sub>3</sub> , BN, B <sub>2</sub> W, Ba, BaGaGe, BaLiP, BaLiSb, BaO, BaO <sub>3</sub> Si, BaO <sub>3</sub> Ti, BaS <sub>3</sub> Ti, BaSe <sub>3</sub> Ti, BaSe <sub>3</sub> Zr, Ba <sub>3</sub> BiN, Ba <sub>3</sub> NSb, Ba <sub>3</sub> Nb <sub>2</sub> O <sub>9</sub> Sr, Ba <sub>3</sub> O <sub>9</sub> SrTa <sub>2</sub> , Ba <sub>3</sub> O <sub>9</sub> Te <sub>2</sub> , Ba <sub>6</sub> O <sub>17</sub> Ti <sub>4</sub> Y <sub>2</sub> , Be, BeHfSi, BeNaSb, BeSe, BeSiZr, Be <sub>2</sub> Mo, Bi <sub>2</sub> Cs <sub>3</sub> I <sub>9</sub> , BrHg <sub>2</sub> N, BrK <sub>3</sub> Mo <sub>2</sub> O <sub>7</sub> , Br <sub>3</sub> CsMg, Br <sub>8</sub> Cs <sub>3</sub> Mo <sub>2</sub> , Br <sub>9</sub> Mo <sub>2</sub> Rb <sub>3</sub> , C, CBLi, CCdTi <sub>2</sub> , CGeNb <sub>2</sub> , CGeTi <sub>2</sub> , CHf <sub>2</sub> Pb, CHf <sub>2</sub> Sn, CK <sub>2</sub> O <sub>3</sub> , CN <sub>2</sub> O <sub>2</sub> Y <sub>2</sub> , CN <sub>2</sub> O <sub>3</sub> , CNb <sub>2</sub> S, CNb <sub>2</sub> Sn, CPbTi <sub>2</sub> , CPbZr <sub>2</sub> , CSnTi <sub>2</sub> , CSnZr <sub>2</sub> , C <sub>2</sub> AlTa <sub>3</sub> , C <sub>2</sub> Al <sub>3</sub> O <sub>5</sub> Sc <sub>3</sub> , C <sub>2</sub> SiTi <sub>3</sub> , C <sub>2</sub> SnTi <sub>3</sub> , C <sub>3</sub> Al <sub>3</sub> Lu, C <sub>3</sub> Al <sub>3</sub> Sc, C <sub>3</sub> Al <sub>3</sub> Y, C <sub>6</sub> Au <sub>3</sub> Cs <sub>2</sub> N <sub>6</sub> Na, CaGaGe, CaGaSn, CaGa <sub>2</sub> P <sub>2</sub> , CaGeZn, CaIn <sub>2</sub> P <sub>2</sub> , CaSiZn, Ca <sub>2</sub> IN, Ca <sub>3</sub> N <sub>2</sub> , Ca <sub>4</sub> Mg <sub>13</sub> Zn <sub>29</sub> , Cd, CdCl <sub>3</sub> Cs, CdMg <sub>3</sub> , CdNa <sub>2</sub> Sn, Cl <sub>3</sub> CsMg, Cl <sub>3</sub> MgRb, Cl <sub>5</sub> Sb, Cl <sub>9</sub> Cs <sub>3</sub> Mo <sub>2</sub> , Cl <sub>9</sub> Cs <sub>3</sub> Ti <sub>2</sub> , Cl <sub>9</sub> Cs <sub>3</sub> W <sub>2</sub> , Cl <sub>9</sub> Mo <sub>2</sub> Rb <sub>3</sub> , Cs, CsI <sub>3</sub> Mg, CsLuS <sub>2</sub> , Cs <sub>2</sub> O <sub>4</sub> S, Cs <sub>2</sub> Pt, Cs <sub>3</sub> F <sub>3</sub> Mo <sub>2</sub> O <sub>6</sub> , Cs <sub>3</sub> I <sub>9</sub> Mo <sub>2</sub> , Cs <sub>3</sub> I <sub>9</sub> Sb <sub>2</sub> , Cs <sub>3</sub> I <sub>9</sub> Y <sub>2</sub> , Cs <sub>3</sub> I <sub>9</sub> Zr <sub>2</sub> , Cs <sub>6</sub> GaK <sub>3</sub> Sb <sub>4</sub> , F <sub>18</sub> Mg <sub>6</sub> Rb <sub>6</sub> , FSY, F <sub>2</sub> Sr, F <sub>3</sub> La, F <sub>3</sub> MgRb, F <sub>3</sub> RbZn, GaGeSr, GaInO <sub>3</sub> , GaInO <sub>5</sub> Zn <sub>2</sub> , GaInO <sub>7</sub> Zn <sub>4</sub> , GaK <sub>6</sub> Na <sub>3</sub> Sb <sub>4</sub> , GaS, GaSe, GaSnSr, GaTe, He, HfN <sub>2</sub> , HfP, Hf <sub>9</sub> Re <sub>4</sub> S, Hf <sub>9</sub> Re <sub>4</sub> Se, HgKSb, Hg <sub>3</sub> U, ILa, ILi, IORb <sub>3</sub> , I <sub>2</sub> K <sub>4</sub> O <sub>9</sub> , I <sub>2</sub> Th, InNTi <sub>2</sub> , InNZr <sub>2</sub> , InPt <sub>2</sub> Y, InS <sub>2</sub> Ta, InS <sub>2</sub> Tl, InSe, In <sub>2</sub> P <sub>2</sub> Sr, KNbS <sub>2</sub> , KNbSe <sub>2</sub> , KPZn, KSbZn, KTL, K <sub>2</sub> O <sub>4</sub> S, K <sub>2</sub> Te <sub>2</sub> , K <sub>3</sub> LaO <sub>9</sub> Te <sub>2</sub> , K <sub>3</sub> LuO <sub>7</sub> Si <sub>2</sub> , K <sub>3</sub> O <sub>7</sub> ScSi <sub>2</sub> , K <sub>3</sub> P, K <sub>3</sub> Sb, Kr, LiNbO <sub>2</sub> , LiNbS <sub>2</sub> , LiPSr, Li <sub>2</sub> O <sub>2</sub> , Li <sub>3</sub> N, Li <sub>3</sub> P, Li <sub>3</sub> Sb, LuMg <sub>2</sub> , Mg, Mg <sub>17</sub> Sr <sub>2</sub> , MgMoN <sub>2</sub> , MgO, MgPo, MgTe, Mg <sub>4</sub> Sr, MoS <sub>2</sub> , MoSe <sub>2</sub> , MoTe <sub>2</sub> , NY, N <sub>2</sub> SZr <sub>2</sub> , N <sub>2</sub> SeZr <sub>2</sub> , N <sub>2</sub> W, Na <sub>13</sub> Pb <sub>5</sub> , NaNbO <sub>2</sub> , NaNbS <sub>2</sub> , NaNbSe <sub>2</sub> , NaS, Na <sub>2</sub> O <sub>4</sub> S, Na <sub>2</sub> S <sub>2</sub> , Na <sub>2</sub> Se <sub>2</sub> , Na <sub>3</sub> P, Na <sub>3</sub> Sb, O <sub>2</sub> RbSc, O <sub>2</sub> SSc <sub>2</sub> , O <sub>2</sub> Si, O <sub>4</sub> Rb <sub>2</sub> S, O <sub>4</sub> STl <sub>2</sub> , PbPt, PbS, PdSnU, PoZr, PtSn, Pt <sub>2</sub> SnU, RbTe <sub>2</sub> Y, Rb <sub>2</sub> S, Rb <sub>2</sub> Te, Rb <sub>3</sub> Sb, Re <sub>2</sub> Y, S <sub>2</sub> ScTl, S <sub>2</sub> Ti, S <sub>2</sub> W, ScZn <sub>2</sub> , Se <sub>2</sub> W, SiSrZn, SiSr <sub>2</sub> , SnTi <sub>2</sub> , SnTi <sub>3</sub> , TaZn <sub>2</sub> , Te <sub>2</sub> W, Xe, Zn, |

Part 22 of all the predicted materials with band crossings from **Cases 1** or **2**:

|     |                                                                                                                                                                                                                                                                                                                                                                                                                                                                                                                                                                                                                                                                                                                                                                                                                                                                                                                                                                                                                                                                                                                                                                                                                                                                                                                                                                                                                                                                                                                                                                                                                                                                                                                                                                                                                                                                                                                                                                                                                                                                                                                                                                                                                                                                                                                                                                                                                   |
|-----|-------------------------------------------------------------------------------------------------------------------------------------------------------------------------------------------------------------------------------------------------------------------------------------------------------------------------------------------------------------------------------------------------------------------------------------------------------------------------------------------------------------------------------------------------------------------------------------------------------------------------------------------------------------------------------------------------------------------------------------------------------------------------------------------------------------------------------------------------------------------------------------------------------------------------------------------------------------------------------------------------------------------------------------------------------------------------------------------------------------------------------------------------------------------------------------------------------------------------------------------------------------------------------------------------------------------------------------------------------------------------------------------------------------------------------------------------------------------------------------------------------------------------------------------------------------------------------------------------------------------------------------------------------------------------------------------------------------------------------------------------------------------------------------------------------------------------------------------------------------------------------------------------------------------------------------------------------------------------------------------------------------------------------------------------------------------------------------------------------------------------------------------------------------------------------------------------------------------------------------------------------------------------------------------------------------------------------------------------------------------------------------------------------------------|
| 195 | I <sub>4</sub> Sn, O <sub>2</sub> Si,                                                                                                                                                                                                                                                                                                                                                                                                                                                                                                                                                                                                                                                                                                                                                                                                                                                                                                                                                                                                                                                                                                                                                                                                                                                                                                                                                                                                                                                                                                                                                                                                                                                                                                                                                                                                                                                                                                                                                                                                                                                                                                                                                                                                                                                                                                                                                                             |
| 196 | Ge <sub>5</sub> Li <sub>22</sub> , Li <sub>22</sub> Pb <sub>5</sub> , Li <sub>22</sub> Sn <sub>5</sub> ,                                                                                                                                                                                                                                                                                                                                                                                                                                                                                                                                                                                                                                                                                                                                                                                                                                                                                                                                                                                                                                                                                                                                                                                                                                                                                                                                                                                                                                                                                                                                                                                                                                                                                                                                                                                                                                                                                                                                                                                                                                                                                                                                                                                                                                                                                                          |
| 197 | Al <sub>6</sub> Ca <sub>4</sub> O <sub>16</sub> S, Al <sub>6</sub> O <sub>16</sub> SSr <sub>4</sub> , Al <sub>6</sub> O <sub>16</sub> Sr <sub>4</sub> W, Bi <sub>12</sub> GeO <sub>20</sub> , Bi <sub>12</sub> O <sub>20</sub> Si, Bi <sub>12</sub> O <sub>20</sub> Ti, Bi <sub>24</sub> O <sub>40</sub> Pb <sub>2</sub> , Bi <sub>24</sub> O <sub>40</sub> Si <sub>2</sub> , Bi <sub>24</sub> O <sub>40</sub> Ti <sub>2</sub> , Bi <sub>2</sub> O <sub>3</sub> , Cs <sub>18</sub> O <sub>6</sub> Tl <sub>8</sub> , Li <sub>3</sub> NbO <sub>4</sub> ,                                                                                                                                                                                                                                                                                                                                                                                                                                                                                                                                                                                                                                                                                                                                                                                                                                                                                                                                                                                                                                                                                                                                                                                                                                                                                                                                                                                                                                                                                                                                                                                                                                                                                                                                                                                                                                                            |
| 198 | Ag <sub>3</sub> NO <sub>3</sub> S, Ag <sub>7</sub> AsS <sub>6</sub> , Ag <sub>7</sub> AsSe <sub>6</sub> , Ag <sub>7</sub> PS <sub>6</sub> , AlNaO <sub>4</sub> Si, Al <sub>2</sub> Ba <sub>3</sub> O <sub>6</sub> , AsClHg <sub>3</sub> O <sub>4</sub> , AsK <sub>3</sub> S <sub>3</sub> , AsK <sub>3</sub> Se <sub>3</sub> , AsNa <sub>3</sub> S <sub>3</sub> , AsNa <sub>3</sub> Se <sub>3</sub> , As <sub>4</sub> Br <sub>6</sub> Hg <sub>6</sub> Sn, BKMgO <sub>3</sub> , BMgO <sub>3</sub> Rb, BaN <sub>2</sub> O <sub>6</sub> , Be <sub>3</sub> Cd <sub>2</sub> F <sub>12</sub> Rb <sub>2</sub> , BiCs <sub>3</sub> O <sub>3</sub> , BiCs <sub>3</sub> Se <sub>3</sub> , BiK <sub>2</sub> RbSe <sub>3</sub> , BiK <sub>3</sub> Se <sub>3</sub> , BiK <sub>3</sub> Te <sub>3</sub> , BiO <sub>3</sub> Rb <sub>3</sub> , BiRb <sub>3</sub> Se <sub>3</sub> , BrNaO <sub>3</sub> , BrP <sub>7</sub> Sr <sub>2</sub> , Br <sub>6</sub> Hg <sub>7</sub> P <sub>4</sub> Sn, CaNa <sub>2</sub> O <sub>4</sub> Si, ClF <sub>3</sub> Sn <sub>2</sub> , ClIn, ClNaO <sub>3</sub> , Cl <sub>4</sub> Hg <sub>3</sub> O, Cl <sub>6</sub> Hg <sub>6</sub> P <sub>4</sub> Pb, CsF <sub>7</sub> Xe, Cs <sub>2</sub> Mg <sub>2</sub> O <sub>12</sub> W <sub>3</sub> , Cs <sub>3</sub> O <sub>3</sub> Sb, Cs <sub>3</sub> S <sub>3</sub> Sb, Cs <sub>3</sub> SbSe <sub>3</sub> , F <sub>4</sub> LiSb, HfOS, HfO <sub>8</sub> W <sub>2</sub> , HgPd, IP <sub>7</sub> Sr <sub>2</sub> , K <sub>2</sub> Mg <sub>2</sub> O <sub>12</sub> S <sub>3</sub> , K <sub>2</sub> O <sub>12</sub> S <sub>3</sub> Zn <sub>2</sub> , K <sub>3</sub> O <sub>3</sub> Sb, K <sub>3</sub> S <sub>3</sub> Sb, K <sub>3</sub> SbSe <sub>3</sub> , K <sub>3</sub> SbTe <sub>3</sub> , MgPt, Mg <sub>2</sub> Mo <sub>3</sub> O <sub>12</sub> Tl <sub>2</sub> , Mg <sub>2</sub> O <sub>12</sub> Rb <sub>2</sub> W <sub>3</sub> , MoNa <sub>2</sub> O <sub>6</sub> Se, N <sub>11</sub> Na <sub>3</sub> P <sub>6</sub> , N <sub>2</sub> , Na <sub>3</sub> S <sub>3</sub> Sb, Na <sub>3</sub> SbSe <sub>3</sub> , Na <sub>3</sub> SbTe <sub>3</sub> , OSZr, O <sub>2</sub> Si, O <sub>3</sub> SrZr, O <sub>4</sub> SnW, O <sub>8</sub> W <sub>2</sub> Zr, P <sub>2</sub> Pb <sub>3</sub> S <sub>8</sub> , Rb <sub>3</sub> S <sub>3</sub> Sb, Rb <sub>3</sub> SbSe <sub>3</sub> , SbSe <sub>3</sub> Tl <sub>3</sub> , Te <sub>3</sub> Tl <sub>2</sub> Zr, |
| 199 | Al <sub>2</sub> Ca <sub>3</sub> F <sub>14</sub> Na <sub>2</sub> , Br <sub>2</sub> Hg <sub>3</sub> Te <sub>2</sub> , Cl <sub>2</sub> Hg <sub>3</sub> S <sub>2</sub> , Cl <sub>2</sub> Hg <sub>3</sub> Se <sub>2</sub> , Cl <sub>2</sub> Hg <sub>3</sub> Te <sub>2</sub> , F <sub>2</sub> Hg <sub>3</sub> S <sub>2</sub> , In <sub>2</sub> O <sub>3</sub> , K <sub>2</sub> O <sub>3</sub> Pb <sub>2</sub> , K <sub>2</sub> O <sub>3</sub> Sn <sub>2</sub> , Lu <sub>2</sub> O <sub>3</sub> , N, O <sub>2</sub> Si, O <sub>3</sub> Sc <sub>2</sub> , O <sub>3</sub> Tl <sub>2</sub> , O <sub>3</sub> Y <sub>2</sub> , Pb <sub>2</sub> Pd <sub>3</sub> S <sub>2</sub> ,                                                                                                                                                                                                                                                                                                                                                                                                                                                                                                                                                                                                                                                                                                                                                                                                                                                                                                                                                                                                                                                                                                                                                                                                                                                                                                                                                                                                                                                                                                                                                                                                                                                                                                                                               |
| 200 | AsBr <sub>3</sub> Ca <sub>3</sub> , CaO <sub>6</sub> Ta <sub>2</sub> , Cd <sub>11</sub> Na <sub>2</sub> , Cl <sub>7</sub> Na, K <sub>6</sub> MgNa <sub>14</sub> Tl <sub>18</sub> , K <sub>6</sub> Na <sub>14</sub> Tl <sub>18</sub> Zn, LuNaO <sub>8</sub> Pd <sub>6</sub> , Mg <sub>2</sub> Zn <sub>11</sub> ,                                                                                                                                                                                                                                                                                                                                                                                                                                                                                                                                                                                                                                                                                                                                                                                                                                                                                                                                                                                                                                                                                                                                                                                                                                                                                                                                                                                                                                                                                                                                                                                                                                                                                                                                                                                                                                                                                                                                                                                                                                                                                                   |
| 201 | BiKO <sub>3</sub> , Br <sub>14</sub> CdW <sub>6</sub> , Br <sub>14</sub> Mo <sub>6</sub> Pb, C <sub>2</sub> Ca, KO <sub>3</sub> Sb,                                                                                                                                                                                                                                                                                                                                                                                                                                                                                                                                                                                                                                                                                                                                                                                                                                                                                                                                                                                                                                                                                                                                                                                                                                                                                                                                                                                                                                                                                                                                                                                                                                                                                                                                                                                                                                                                                                                                                                                                                                                                                                                                                                                                                                                                               |
| 203 | AsRb <sub>3</sub> Se <sub>16</sub> , O <sub>2</sub> Si,                                                                                                                                                                                                                                                                                                                                                                                                                                                                                                                                                                                                                                                                                                                                                                                                                                                                                                                                                                                                                                                                                                                                                                                                                                                                                                                                                                                                                                                                                                                                                                                                                                                                                                                                                                                                                                                                                                                                                                                                                                                                                                                                                                                                                                                                                                                                                           |
| 204 | Al <sub>12</sub> Mo, Al <sub>12</sub> W, BaGe <sub>12</sub> Pt <sub>4</sub> , C <sub>10</sub> Cs, C <sub>8</sub> , CaO <sub>12</sub> Pd <sub>3</sub> Ti <sub>4</sub> , CaO <sub>3</sub> Si, NPd <sub>3</sub> , N <sub>2</sub> O <sub>4</sub> ,                                                                                                                                                                                                                                                                                                                                                                                                                                                                                                                                                                                                                                                                                                                                                                                                                                                                                                                                                                                                                                                                                                                                                                                                                                                                                                                                                                                                                                                                                                                                                                                                                                                                                                                                                                                                                                                                                                                                                                                                                                                                                                                                                                    |
| 205 | AgPd <sub>3</sub> Se, Ag <sub>2</sub> As <sub>4</sub> Hg <sub>7</sub> I <sub>6</sub> , AlF <sub>6</sub> K <sub>2</sub> Na, As <sub>2</sub> Br <sub>3</sub> Cd <sub>4</sub> , As <sub>2</sub> Br <sub>3</sub> Hg <sub>4</sub> , As <sub>2</sub> Pd, As <sub>2</sub> Pt, As <sub>4</sub> BiCl <sub>7</sub> Hg <sub>6</sub> , As <sub>4</sub> Br <sub>7</sub> Hg <sub>6</sub> In, As <sub>4</sub> Cl <sub>7</sub> Hg <sub>6</sub> In, As <sub>4</sub> Cl <sub>7</sub> Hg <sub>6</sub> Mo, Au <sub>3</sub> CaGa, Au <sub>3</sub> GeNa, Au <sub>3</sub> NaSi, BaF <sub>7</sub> Ta, BaGa <sub>2</sub> S <sub>4</sub> , Br <sub>7</sub> Hg <sub>6</sub> InSb <sub>4</sub> , Br <sub>7</sub> Hg <sub>6</sub> Sb <sub>5</sub> , Br <sub>9</sub> In <sub>7</sub> , CO <sub>2</sub> , C <sub>2</sub> Si, C <sub>60</sub> , CdO <sub>2</sub> , CdS <sub>2</sub> , CdSe <sub>2</sub> , Cd <sub>7</sub> Cl <sub>6</sub> P <sub>4</sub> , Cl <sub>12</sub> I <sub>2</sub> Nb <sub>6</sub> , Cl <sub>9</sub> In <sub>7</sub> , CsF <sub>7</sub> W, CsO <sub>6</sub> Se <sub>2</sub> Y, F <sub>2</sub> Mg, F <sub>6</sub> NaSb, Ga <sub>4</sub> GeS <sub>4</sub> , GeI <sub>4</sub> , GeO <sub>2</sub> , GeO <sub>6</sub> Se <sub>2</sub> , Ge <sub>8</sub> NaRb <sub>7</sub> , HfN <sub>2</sub> , I <sub>4</sub> Sn, In <sub>4</sub> S <sub>4</sub> Sn, K <sub>7</sub> LiSi <sub>8</sub> , Li <sub>7</sub> N <sub>4</sub> Nb, MgO <sub>2</sub> , MgSe <sub>2</sub> , MgTe <sub>2</sub> , N <sub>2</sub> , N <sub>2</sub> Pd, N <sub>2</sub> Pt, N <sub>2</sub> W, NaRb <sub>7</sub> Si <sub>8</sub> , O <sub>2</sub> Pt, O <sub>2</sub> Sn, O <sub>2</sub> Sn, O <sub>2</sub> U, O <sub>6</sub> Se <sub>2</sub> Sn, O <sub>7</sub> P <sub>2</sub> Si, P <sub>2</sub> Pt, P <sub>2</sub> Si, PdSb <sub>2</sub> , PtSb <sub>2</sub> , S <sub>2</sub> Ti, S <sub>2</sub> Zn, Se <sub>2</sub> Zn,                                                                                                                                                                                                                                                                                                                                                                                                                                                                                                                                     |
| 206 | AgF <sub>6</sub> Sb, AlLi <sub>3</sub> N <sub>2</sub> , As <sub>2</sub> Mg <sub>3</sub> , Be <sub>3</sub> N <sub>2</sub> , Be <sub>3</sub> P <sub>2</sub> , BiF <sub>6</sub> K, Bi <sub>2</sub> O <sub>3</sub> , C, Ca <sub>3</sub> N <sub>2</sub> , Cd <sub>3</sub> N <sub>2</sub> , Cd <sub>3</sub> P <sub>2</sub> , F <sub>6</sub> KSb, GaLi <sub>3</sub> N <sub>2</sub> , HfO <sub>8</sub> Te <sub>3</sub> , In <sub>2</sub> O <sub>3</sub> , La <sub>2</sub> O <sub>3</sub> , Li <sub>3</sub> N <sub>2</sub> Sc, Lu <sub>2</sub> O <sub>3</sub> , Mg <sub>3</sub> N <sub>2</sub> , Mg <sub>3</sub> P <sub>2</sub> , Mg <sub>3</sub> Sb <sub>2</sub> , N <sub>2</sub> Zn <sub>3</sub> , O <sub>2</sub> Si, O <sub>3</sub> Sc <sub>2</sub> , O <sub>3</sub> Tl <sub>2</sub> , O <sub>3</sub> Y <sub>2</sub> , O <sub>8</sub> SnTe <sub>3</sub> , O <sub>8</sub> Te <sub>3</sub> Ti, O <sub>8</sub> Te <sub>3</sub> Zr, P <sub>2</sub> Zn <sub>3</sub> ,                                                                                                                                                                                                                                                                                                                                                                                                                                                                                                                                                                                                                                                                                                                                                                                                                                                                                                                                                                                                                                                                                                                                                                                                                                                                                                                                                                                                                                                        |
| 212 | Bi <sub>2</sub> K <sub>3</sub> N <sub>9</sub> O <sub>27</sub> , O <sub>8</sub> Ti <sub>3</sub> Zn <sub>2</sub> ,                                                                                                                                                                                                                                                                                                                                                                                                                                                                                                                                                                                                                                                                                                                                                                                                                                                                                                                                                                                                                                                                                                                                                                                                                                                                                                                                                                                                                                                                                                                                                                                                                                                                                                                                                                                                                                                                                                                                                                                                                                                                                                                                                                                                                                                                                                  |
| 213 | Ag <sub>4</sub> S <sub>8</sub> Sn <sub>3</sub> , Be <sub>2</sub> CsF <sub>5</sub> , CaI <sub>2</sub> Mo <sub>3</sub> , Cs <sub>3</sub> N <sub>11</sub> P <sub>6</sub> , K <sub>3</sub> N <sub>11</sub> P <sub>6</sub> , N <sub>11</sub> P <sub>6</sub> Rb <sub>3</sub> , Si <sub>2</sub> Sr,                                                                                                                                                                                                                                                                                                                                                                                                                                                                                                                                                                                                                                                                                                                                                                                                                                                                                                                                                                                                                                                                                                                                                                                                                                                                                                                                                                                                                                                                                                                                                                                                                                                                                                                                                                                                                                                                                                                                                                                                                                                                                                                      |
| 214 | Ag <sub>3</sub> AuSe <sub>2</sub> , Ag <sub>3</sub> AuTe <sub>2</sub> , AsI <sub>3</sub> La <sub>3</sub> , BBa <sub>2</sub> ClN <sub>2</sub> , Ca <sub>3</sub> I <sub>3</sub> P, Ca <sub>3</sub> O <sub>12</sub> Te <sub>2</sub> Zn <sub>3</sub> , I <sub>3</sub> La <sub>3</sub> P, I <sub>3</sub> La <sub>3</sub> Sb,                                                                                                                                                                                                                                                                                                                                                                                                                                                                                                                                                                                                                                                                                                                                                                                                                                                                                                                                                                                                                                                                                                                                                                                                                                                                                                                                                                                                                                                                                                                                                                                                                                                                                                                                                                                                                                                                                                                                                                                                                                                                                           |
| 215 | Au <sub>9</sub> In <sub>4</sub> , Be <sub>4</sub> Na <sub>10</sub> O <sub>17</sub> Si <sub>4</sub> , BiF <sub>3</sub> , BiMg <sub>63</sub> Si <sub>32</sub> , C <sub>8</sub> S <sub>4</sub> O <sub>4</sub> , CK <sub>4</sub> O <sub>4</sub> , CLi <sub>4</sub> O <sub>4</sub> , CNa <sub>4</sub> O <sub>4</sub> , C <sub>2</sub> N <sub>2</sub> Zn, C <sub>3</sub> N <sub>2</sub> , C <sub>3</sub> N <sub>4</sub> , C <sub>4</sub> BLiN <sub>4</sub> , In <sub>5</sub> Ti <sub>8</sub> , Li <sub>2</sub> MgSi,                                                                                                                                                                                                                                                                                                                                                                                                                                                                                                                                                                                                                                                                                                                                                                                                                                                                                                                                                                                                                                                                                                                                                                                                                                                                                                                                                                                                                                                                                                                                                                                                                                                                                                                                                                                                                                                                                                    |

Part 23 of all the predicted materials with band crossings from **Cases 1** or **2**:

|     |                                                                                                                                                                                                                                                                                                                                                                                                                                                                                                                                                                                                                                                                                                                                                                                                                                                                                                                                                                                                                                                                                                                                                                                                                                                                                                                                                                                                                                                                                                                                                                                                                                                                                                                                                                                                                                                                                                                                                                                                                                                                                                                                                                                           |
|-----|-------------------------------------------------------------------------------------------------------------------------------------------------------------------------------------------------------------------------------------------------------------------------------------------------------------------------------------------------------------------------------------------------------------------------------------------------------------------------------------------------------------------------------------------------------------------------------------------------------------------------------------------------------------------------------------------------------------------------------------------------------------------------------------------------------------------------------------------------------------------------------------------------------------------------------------------------------------------------------------------------------------------------------------------------------------------------------------------------------------------------------------------------------------------------------------------------------------------------------------------------------------------------------------------------------------------------------------------------------------------------------------------------------------------------------------------------------------------------------------------------------------------------------------------------------------------------------------------------------------------------------------------------------------------------------------------------------------------------------------------------------------------------------------------------------------------------------------------------------------------------------------------------------------------------------------------------------------------------------------------------------------------------------------------------------------------------------------------------------------------------------------------------------------------------------------------|
| 216 | AgI, AgKO, AgN, AgNaO, AgORb, AlAs, AlBBE, AlGeLi, AlLiSi, AlN, AlP, AlSb, Al <sub>4</sub> La <sub>17</sub> N <sub>33</sub> Si <sub>9</sub> , AsB, AsGa, AsLiMg, AsLiZn, Au <sub>10</sub> Mo <sub>4</sub> Zn <sub>89</sub> , AuGaLi <sub>2</sub> , AuLi <sub>2</sub> Tl, AuLuSn, AuScSn, B <sub>11</sub> Li, BN, BP, BSb, BaO <sub>4</sub> S, Ba <sub>3</sub> In <sub>2</sub> O <sub>11</sub> Zn <sub>5</sub> , Ba <sub>3</sub> Lu <sub>2</sub> O <sub>11</sub> Zn <sub>5</sub> , Be <sub>17</sub> Ca <sub>12</sub> O <sub>29</sub> , BeO, BePo, BeS, BeTe, Be <sub>4</sub> O <sub>7</sub> Te, Be <sub>5</sub> Pd, Be <sub>5</sub> Pt, BrMoS, C, CGe, CHf, CPT, CSi, CSn, CZr, Ca <sub>16</sub> N <sub>34</sub> Si <sub>17</sub> , CaSe, CdLiP, CdS, CdSe, CdTe, Cd <sub>45</sub> Y <sub>11</sub> , ClCsO <sub>4</sub> , ClKO <sub>4</sub> , ClNaO <sub>4</sub> , ClO <sub>4</sub> Rb, ClO <sub>4</sub> Tl, CsLiMoO <sub>4</sub> , GaLiSi, GaN, GaP, GeLi <sub>2</sub> Sn, GeLi <sub>2</sub> Zn, GePtTi, GeTi <sub>2</sub> , HfPdSn, HfPtSn, HgS, Hg <sub>45</sub> U <sub>11</sub> , InLaPt <sub>4</sub> , InN, InP, K <sub>3</sub> Sb, LiMgP, LiNZn, LiPZn, Li <sub>21</sub> Si <sub>5</sub> , MgS, MgSe, MgTe, NRe, NSc, NTa, NTL, NY, OZn, O <sub>4</sub> SSr, O <sub>4</sub> SZn, PSc, Pd <sub>17</sub> Te <sub>4</sub> , PdSbSc, PdSnZr, Pd <sub>4</sub> Te, PtSbSc, PtSbY, PtSnTh, PtSnTi, PtSnU, Pt <sub>5</sub> U, Re <sub>4</sub> S <sub>4</sub> Te <sub>4</sub> , SSn, SZn, SeZn, Si, SiSn, SnTe, SnTi <sub>2</sub> , TeZn,                                                                                                                                                                                                                                                                                                                                                                                                                                                                                                                                                                                                                                                     |
| 217 | Ag <sub>3</sub> Ge <sub>3</sub> P <sub>6</sub> Sn <sub>2</sub> , Ag <sub>3</sub> P <sub>6</sub> Si <sub>3</sub> Sn <sub>2</sub> , Al <sub>12</sub> Ca <sub>8</sub> O <sub>24</sub> S <sub>2</sub> , Al <sub>12</sub> Ca <sub>8</sub> O <sub>24</sub> Te <sub>2</sub> , Al <sub>12</sub> Cd <sub>8</sub> O <sub>24</sub> S <sub>2</sub> , Al <sub>12</sub> Cd <sub>8</sub> O <sub>24</sub> Te <sub>2</sub> , Al <sub>12</sub> O <sub>24</sub> S <sub>2</sub> Sr <sub>8</sub> , Al <sub>12</sub> O <sub>24</sub> Sr <sub>8</sub> Te <sub>2</sub> , Al <sub>6</sub> Ca <sub>4</sub> O <sub>13</sub> , Al <sub>6</sub> Ca <sub>4</sub> O <sub>16</sub> W, B <sub>12</sub> O <sub>24</sub> Se <sub>2</sub> Zn <sub>8</sub> , BiK <sub>3</sub> O <sub>3</sub> , BiNa <sub>3</sub> O <sub>3</sub> , CaNa <sub>10</sub> Sn <sub>12</sub> , Cd <sub>4</sub> N <sub>12</sub> P <sub>6</sub> S, F <sub>4</sub> Ge, F <sub>4</sub> Si, K <sub>3</sub> S <sub>4</sub> Sb, Li <sub>3</sub> NbO <sub>4</sub> , Mg <sub>4</sub> N <sub>12</sub> P <sub>6</sub> S, N <sub>12</sub> P <sub>6</sub> SZn <sub>4</sub> , N <sub>2</sub> , N <sub>24</sub> O <sub>2</sub> P <sub>12</sub> Zn <sub>8</sub> , Na <sub>10</sub> Sn <sub>12</sub> Sr, Na <sub>3</sub> O <sub>3</sub> Sb, Na <sub>3</sub> PSe <sub>4</sub> , Na <sub>3</sub> S <sub>4</sub> Sb, Na <sub>3</sub> SbSe <sub>4</sub> , NbS <sub>4</sub> Tl <sub>3</sub> , NbSe <sub>4</sub> Tl <sub>3</sub> , Nb <sub>3</sub> Sb <sub>2</sub> Te <sub>5</sub> , O <sub>2</sub> Si, S <sub>4</sub> TaTl <sub>3</sub> , Se <sub>4</sub> TaTl <sub>3</sub> , Si,                                                                                                                                                                                                                                                                                                                                                                                                                                                                                                                                                                                           |
| 218 | Ag <sub>3</sub> AsO <sub>4</sub> , Al <sub>6</sub> Br <sub>2</sub> Ge <sub>6</sub> Li <sub>8</sub> O <sub>24</sub> , Al <sub>6</sub> Br <sub>2</sub> Ge <sub>6</sub> Na <sub>8</sub> O <sub>24</sub> , Al <sub>6</sub> Cl <sub>2</sub> Ge <sub>6</sub> Na <sub>8</sub> O <sub>24</sub> , Al <sub>6</sub> Cl <sub>2</sub> K <sub>8</sub> O <sub>24</sub> Si <sub>6</sub> , Al <sub>6</sub> Cl <sub>2</sub> Na <sub>8</sub> O <sub>24</sub> Si <sub>6</sub> , Al <sub>6</sub> Ge <sub>6</sub> L <sub>2</sub> Li <sub>8</sub> O <sub>24</sub> , Al <sub>6</sub> Ge <sub>6</sub> L <sub>2</sub> Na <sub>8</sub> O <sub>24</sub> , Al <sub>6</sub> I <sub>2</sub> Na <sub>8</sub> O <sub>24</sub> Si <sub>6</sub> , As <sub>3</sub> Be <sub>3</sub> ClLi <sub>4</sub> O <sub>12</sub> , As <sub>4</sub> Ba <sub>4</sub> Ge, As <sub>4</sub> Ba <sub>4</sub> Si, As <sub>4</sub> Ba <sub>4</sub> Ti, As <sub>4</sub> Sr <sub>4</sub> Ti, As <sub>8</sub> Ge <sub>38</sub> I <sub>8</sub> , Ba <sub>4</sub> P <sub>4</sub> Si, BeCl <sub>2</sub> , BeF <sub>2</sub> , Be <sub>6</sub> Cd <sub>8</sub> O <sub>24</sub> S <sub>2</sub> Si <sub>6</sub> , Be <sub>6</sub> Cd <sub>8</sub> O <sub>24</sub> Se <sub>2</sub> Si <sub>6</sub> , Be <sub>6</sub> O <sub>24</sub> S <sub>2</sub> Si <sub>6</sub> Zn <sub>8</sub> , Br <sub>2</sub> Ga <sub>6</sub> Li <sub>8</sub> O <sub>24</sub> Si <sub>6</sub> , Br <sub>2</sub> Ga <sub>6</sub> Na <sub>8</sub> O <sub>24</sub> Si <sub>6</sub> , Br <sub>8</sub> Ge <sub>38</sub> P <sub>8</sub> , Cl <sub>2</sub> Ga <sub>6</sub> Li <sub>8</sub> O <sub>24</sub> Si <sub>6</sub> , Cl <sub>4</sub> Se, CsSi, Cs <sub>4</sub> Ge <sub>4</sub> , Cs <sub>4</sub> Se <sub>4</sub> Si, Cs <sub>8</sub> Sn <sub>8</sub> , Ga <sub>6</sub> L <sub>2</sub> Li <sub>8</sub> O <sub>24</sub> Si <sub>6</sub> , GeK, GeK <sub>4</sub> Se <sub>4</sub> , GeRb, Ge <sub>38</sub> I <sub>8</sub> P <sub>8</sub> , Ge <sub>4</sub> K <sub>4</sub> , Ge <sub>4</sub> Rb <sub>4</sub> , KSi, K <sub>4</sub> Si <sub>4</sub> , P <sub>4</sub> Sr <sub>4</sub> Ti, RbSi, Rb <sub>4</sub> S <sub>4</sub> Sn, Rb <sub>4</sub> Si <sub>4</sub> ,                       |
| 219 | Cl <sub>16</sub> Ge <sub>6</sub> , Cl <sub>16</sub> Si <sub>6</sub> ,                                                                                                                                                                                                                                                                                                                                                                                                                                                                                                                                                                                                                                                                                                                                                                                                                                                                                                                                                                                                                                                                                                                                                                                                                                                                                                                                                                                                                                                                                                                                                                                                                                                                                                                                                                                                                                                                                                                                                                                                                                                                                                                     |
| 220 | Ag <sub>3</sub> F <sub>24</sub> Sb <sub>4</sub> , Al <sub>14</sub> Ca <sub>12</sub> O <sub>32</sub> , AlO <sub>9</sub> P <sub>3</sub> , Au <sub>3</sub> La <sub>3</sub> Sb <sub>4</sub> , Bi <sub>4</sub> Ge <sub>3</sub> O <sub>12</sub> , Bi <sub>4</sub> O <sub>12</sub> Si <sub>3</sub> , C <sub>8</sub> Ag <sub>4</sub> Cs <sub>5</sub> IN <sub>8</sub> , Ca <sub>12</sub> Li <sub>6</sub> MO <sub>4</sub> N <sub>16</sub> O <sub>3</sub> ,                                                                                                                                                                                                                                                                                                                                                                                                                                                                                                                                                                                                                                                                                                                                                                                                                                                                                                                                                                                                                                                                                                                                                                                                                                                                                                                                                                                                                                                                                                                                                                                                                                                                                                                                          |
| 221 | AgF <sub>3</sub> Zn, AgGa, AgI, AgIn, AgLi, AgNbO <sub>3</sub> , AlAu, AlBiO <sub>3</sub> , AlF <sub>3</sub> , AlLaO <sub>3</sub> , AlSc, AlY, AsCa <sub>3</sub> Cl <sub>3</sub> , AsCa <sub>3</sub> N, AuCs, B <sub>6</sub> Ba, B <sub>6</sub> Ca, B <sub>6</sub> Si, B <sub>6</sub> Sr, BaF <sub>3</sub> Li, BaO <sub>3</sub> Sn, BaO <sub>3</sub> Ti, BaO <sub>3</sub> Zr, BaSe, BaTe, BeCsF <sub>3</sub> , BeTi, BiCa <sub>3</sub> N, BiGaO <sub>3</sub> , BiInO <sub>3</sub> , BiK <sub>9</sub> O <sub>24</sub> U <sub>6</sub> , BiNSr <sub>3</sub> , BiO <sub>3</sub> Sc, BrCs, BrK, BrLi <sub>3</sub> O, BrRb, BrTl, Br <sub>3</sub> CaCs, Br <sub>3</sub> CdCs, Br <sub>3</sub> CsGe, Br <sub>3</sub> CsPb, CPbPd <sub>3</sub> , CPt <sub>3</sub> Sn, CTh, C <sub>3</sub> N <sub>2</sub> , C <sub>3</sub> Nb <sub>4</sub> , CaCsF <sub>3</sub> , CaF <sub>3</sub> Li, CaF <sub>3</sub> Rb, CaO <sub>3</sub> Si, CaO <sub>3</sub> Sn, CaO <sub>3</sub> Ti, CaPd, Ca <sub>3</sub> Cl <sub>3</sub> P, Ca <sub>3</sub> GeO, Ca <sub>3</sub> NP, Ca <sub>3</sub> OPb, Ca <sub>3</sub> OSn, CdCl <sub>3</sub> Cs, CdCsF <sub>3</sub> , CdF <sub>3</sub> K, CdF <sub>3</sub> Rb, ClCs, ClK, ClNa, ClNa <sub>3</sub> O, ClRb, ClTi, Cl <sub>3</sub> CsHg, Cl <sub>3</sub> CsPb, Cl <sub>3</sub> CsSn, CsF <sub>3</sub> Hg, CsF <sub>3</sub> Pb, CsF <sub>3</sub> Sr, CsI, CsI <sub>3</sub> Pb, CsI <sub>3</sub> Sn, F <sub>3</sub> HgRb, F <sub>3</sub> KMg, F <sub>3</sub> KZn, F <sub>3</sub> MgNa, F <sub>3</sub> MgRb, F <sub>3</sub> Mg <sub>3</sub> N, F <sub>3</sub> Sc, F <sub>3</sub> Y, GeI <sub>3</sub> Rb, GeO <sub>3</sub> Pb, GeO <sub>3</sub> Sr, HfO <sub>3</sub> Pb, HfO <sub>3</sub> Sr, HfPd <sub>3</sub> , HgMg, HgPt <sub>3</sub> , HgTi <sub>3</sub> , IK, IRb, ITl, KNbO <sub>3</sub> , KO <sub>3</sub> Ta, LaN, LiTl, Li <sub>9</sub> NS <sub>3</sub> , MgO, MgPd, NSbSr <sub>3</sub> , NTi <sub>3</sub> Tl, NY, N <sub>3</sub> TaTh, NaNbO <sub>3</sub> , NaO <sub>3</sub> Ta, OSnSr <sub>3</sub> , OSr, OZn, O <sub>3</sub> PbTi, O <sub>3</sub> PbZr, O <sub>3</sub> SiSr, O <sub>3</sub> SnSr, O <sub>3</sub> SnTi, O <sub>3</sub> SrTi, O <sub>3</sub> SrZr, |

Part 24 of all the predicted materials with band crossings from **Cases 1** or **2**:

|     |                                                                                                                                                                                                                                                                                                                                                                                                                                                                                                                                                                                                                                                                                                                                                                                                                                                                                                                                                                                                                                                                                                                                                                                                                                                                                                                                                                                                                                                                                                                                                                                                                                                                                                                                                                                                                                                                                                                                                                                                                                                                                                                                                                                                                                                                                                                                                                                                                                                                                                                                                                                                                                                                                                                                                                                                                                                                                                                                                                                                                                                                                                                                                                                                                                                                                                                                                                                                                                                                                                                                                                                                                                                                                                                                                                                                                                                                                                                                                                                                                                                                                                                                                                                                                                                                                                                                                                                                                                                                                                                                                                                                                                                                                                                                                                                                                                                                                                                                                                                                                                                                                                                                                                                                                                                                                                                                                                                                                                                                                                                                                                                                                                                                                                                                                                                                                                                                                                                                                                                                                                                                                                                                                                                                                                                                                                                                                                                                                                                                                                                                                                                                                                                                                                                                                                                                                                                                                                                                                                                                                                                                                                                                                                                                                                                                               |
|-----|-------------------------------------------------------------------------------------------------------------------------------------------------------------------------------------------------------------------------------------------------------------------------------------------------------------------------------------------------------------------------------------------------------------------------------------------------------------------------------------------------------------------------------------------------------------------------------------------------------------------------------------------------------------------------------------------------------------------------------------------------------------------------------------------------------------------------------------------------------------------------------------------------------------------------------------------------------------------------------------------------------------------------------------------------------------------------------------------------------------------------------------------------------------------------------------------------------------------------------------------------------------------------------------------------------------------------------------------------------------------------------------------------------------------------------------------------------------------------------------------------------------------------------------------------------------------------------------------------------------------------------------------------------------------------------------------------------------------------------------------------------------------------------------------------------------------------------------------------------------------------------------------------------------------------------------------------------------------------------------------------------------------------------------------------------------------------------------------------------------------------------------------------------------------------------------------------------------------------------------------------------------------------------------------------------------------------------------------------------------------------------------------------------------------------------------------------------------------------------------------------------------------------------------------------------------------------------------------------------------------------------------------------------------------------------------------------------------------------------------------------------------------------------------------------------------------------------------------------------------------------------------------------------------------------------------------------------------------------------------------------------------------------------------------------------------------------------------------------------------------------------------------------------------------------------------------------------------------------------------------------------------------------------------------------------------------------------------------------------------------------------------------------------------------------------------------------------------------------------------------------------------------------------------------------------------------------------------------------------------------------------------------------------------------------------------------------------------------------------------------------------------------------------------------------------------------------------------------------------------------------------------------------------------------------------------------------------------------------------------------------------------------------------------------------------------------------------------------------------------------------------------------------------------------------------------------------------------------------------------------------------------------------------------------------------------------------------------------------------------------------------------------------------------------------------------------------------------------------------------------------------------------------------------------------------------------------------------------------------------------------------------------------------------------------------------------------------------------------------------------------------------------------------------------------------------------------------------------------------------------------------------------------------------------------------------------------------------------------------------------------------------------------------------------------------------------------------------------------------------------------------------------------------------------------------------------------------------------------------------------------------------------------------------------------------------------------------------------------------------------------------------------------------------------------------------------------------------------------------------------------------------------------------------------------------------------------------------------------------------------------------------------------------------------------------------------------------------------------------------------------------------------------------------------------------------------------------------------------------------------------------------------------------------------------------------------------------------------------------------------------------------------------------------------------------------------------------------------------------------------------------------------------------------------------------------------------------------------------------------------------------------------------------------------------------------------------------------------------------------------------------------------------------------------------------------------------------------------------------------------------------------------------------------------------------------------------------------------------------------------------------------------------------------------------------------------------------------------------------------------------------------------------------------------------------------------------------------------------------------------------------------------------------------------------------------------------------------------------------------------------------------------------------------------------------------------------------------------------------------------------------------------------------------------------------------------------------------------------------------------------------------------------------|
| 221 | O <sub>3</sub> U, O <sub>3</sub> W, PbPt <sub>3</sub> , PbS, PbSe, PbTe, Pt <sub>3</sub> Sn, Pt <sub>3</sub> Zn, SSr, SiU <sub>3</sub> ,<br>SnTe, Sn <sub>3</sub> U,                                                                                                                                                                                                                                                                                                                                                                                                                                                                                                                                                                                                                                                                                                                                                                                                                                                                                                                                                                                                                                                                                                                                                                                                                                                                                                                                                                                                                                                                                                                                                                                                                                                                                                                                                                                                                                                                                                                                                                                                                                                                                                                                                                                                                                                                                                                                                                                                                                                                                                                                                                                                                                                                                                                                                                                                                                                                                                                                                                                                                                                                                                                                                                                                                                                                                                                                                                                                                                                                                                                                                                                                                                                                                                                                                                                                                                                                                                                                                                                                                                                                                                                                                                                                                                                                                                                                                                                                                                                                                                                                                                                                                                                                                                                                                                                                                                                                                                                                                                                                                                                                                                                                                                                                                                                                                                                                                                                                                                                                                                                                                                                                                                                                                                                                                                                                                                                                                                                                                                                                                                                                                                                                                                                                                                                                                                                                                                                                                                                                                                                                                                                                                                                                                                                                                                                                                                                                                                                                                                                                                                                                                                          |
| 223 | BiNb <sub>3</sub> , C <sub>60</sub> Ba <sub>3</sub> , Cl <sub>2</sub> Hg <sub>3</sub> S <sub>2</sub> , HgTi <sub>3</sub> , HgZr <sub>3</sub> , MgO, Nb <sub>3</sub> Sb, SbTa <sub>3</sub> , SbTa <sub>3</sub> , Si,<br>Si <sub>46</sub> ,                                                                                                                                                                                                                                                                                                                                                                                                                                                                                                                                                                                                                                                                                                                                                                                                                                                                                                                                                                                                                                                                                                                                                                                                                                                                                                                                                                                                                                                                                                                                                                                                                                                                                                                                                                                                                                                                                                                                                                                                                                                                                                                                                                                                                                                                                                                                                                                                                                                                                                                                                                                                                                                                                                                                                                                                                                                                                                                                                                                                                                                                                                                                                                                                                                                                                                                                                                                                                                                                                                                                                                                                                                                                                                                                                                                                                                                                                                                                                                                                                                                                                                                                                                                                                                                                                                                                                                                                                                                                                                                                                                                                                                                                                                                                                                                                                                                                                                                                                                                                                                                                                                                                                                                                                                                                                                                                                                                                                                                                                                                                                                                                                                                                                                                                                                                                                                                                                                                                                                                                                                                                                                                                                                                                                                                                                                                                                                                                                                                                                                                                                                                                                                                                                                                                                                                                                                                                                                                                                                                                                                     |
| 224 | Al <sub>3</sub> LuO <sub>8</sub> Pb <sub>2</sub> , Au <sub>2</sub> S, C <sub>2</sub> N <sub>4</sub> Si, Mg <sub>3</sub> P <sub>2</sub> , O <sub>2</sub> Si,                                                                                                                                                                                                                                                                                                                                                                                                                                                                                                                                                                                                                                                                                                                                                                                                                                                                                                                                                                                                                                                                                                                                                                                                                                                                                                                                                                                                                                                                                                                                                                                                                                                                                                                                                                                                                                                                                                                                                                                                                                                                                                                                                                                                                                                                                                                                                                                                                                                                                                                                                                                                                                                                                                                                                                                                                                                                                                                                                                                                                                                                                                                                                                                                                                                                                                                                                                                                                                                                                                                                                                                                                                                                                                                                                                                                                                                                                                                                                                                                                                                                                                                                                                                                                                                                                                                                                                                                                                                                                                                                                                                                                                                                                                                                                                                                                                                                                                                                                                                                                                                                                                                                                                                                                                                                                                                                                                                                                                                                                                                                                                                                                                                                                                                                                                                                                                                                                                                                                                                                                                                                                                                                                                                                                                                                                                                                                                                                                                                                                                                                                                                                                                                                                                                                                                                                                                                                                                                                                                                                                                                                                                                   |
| 225 | AgBr, AgCl, AgI, Ag <sub>2</sub> MgZn, Al <sub>16</sub> Pt <sub>7</sub> Zr <sub>6</sub> , AlAu <sub>2</sub> Sc, AlF <sub>6</sub> K <sub>2</sub> Li, AlF <sub>6</sub> K <sub>2</sub> Na, AlF <sub>6</sub> K <sub>3</sub> , AlF <sub>6</sub> NaRb <sub>2</sub> ,<br>AlN, Al <sub>2</sub> O, Al <sub>4</sub> In <sub>3</sub> Sr <sub>11</sub> , AsF <sub>6</sub> Na, AsLu, AsNa <sub>3</sub> , AsSc, AsY, AuLi <sub>3</sub> , Au <sub>2</sub> Cl <sub>6</sub> Cs <sub>2</sub> , Au <sub>2</sub> InLu,<br>Au <sub>2</sub> InSc, Au <sub>2</sub> InY, B <sub>12</sub> Hf, B <sub>12</sub> Th, Ba, BaBiO <sub>3</sub> , BaO, BaPo, BaS, BaSe, BaTe,<br>Ba <sub>2</sub> Bi <sub>2</sub> O <sub>6</sub> , Ba <sub>2</sub> CaMoO <sub>6</sub> , Ba <sub>2</sub> CaO <sub>6</sub> Te, Ba <sub>2</sub> CaO <sub>6</sub> W, Ba <sub>2</sub> CdO <sub>6</sub> U, Ba <sub>2</sub> INaO <sub>6</sub> , Ba <sub>2</sub> InNbO <sub>6</sub> , Ba <sub>2</sub> InO <sub>6</sub> Ta,<br>Ba <sub>2</sub> LiO <sub>6</sub> Re, Ba <sub>2</sub> LuNbO <sub>6</sub> , Ba <sub>2</sub> LuO <sub>6</sub> Sb,<br>Ba <sub>2</sub> LuO <sub>6</sub> Ta, Ba <sub>2</sub> MgO <sub>6</sub> Te, Ba <sub>2</sub> MgO <sub>6</sub> U, Ba <sub>2</sub> MgO <sub>6</sub> W, Ba <sub>2</sub> NaO <sub>6</sub> Re, Ba <sub>2</sub> NbO <sub>6</sub> Y, Ba <sub>2</sub> O <sub>6</sub> PbU, Ba <sub>2</sub> O <sub>6</sub> SbY,<br>Ba <sub>2</sub> O <sub>6</sub> SrU, Ba <sub>2</sub> O <sub>6</sub> TaY, Ba <sub>2</sub> O <sub>6</sub> TeZn,<br>Ba <sub>2</sub> O <sub>6</sub> UZn, Ba <sub>2</sub> O <sub>6</sub> WZn, Ba <sub>3</sub> O <sub>6</sub> W, BeO, BeSe, BiCl <sub>6</sub> Cs <sub>2</sub> Na, BiCs <sub>2</sub> F <sub>6</sub> K, BiCs <sub>2</sub> F <sub>6</sub> Na, BiCs <sub>2</sub> F <sub>6</sub> Rb, BiCs <sub>3</sub> ,<br>BiF <sub>3</sub> ,<br>BiF <sub>6</sub> KRb <sub>2</sub> , BiF <sub>6</sub> NaRb <sub>2</sub> , BiI <sub>3</sub> , BiLa, BiLi <sub>3</sub> , BiLu, BiRb <sub>3</sub> , BiSc, BiY, BrCs, BrK,<br>BrLi, BrNa, BrRb, BrTl, Br <sub>6</sub> Cs <sub>2</sub> LaNa, Br <sub>6</sub> Cs <sub>2</sub> NaY, Br <sub>6</sub> Cs <sub>2</sub> Po, Br <sub>6</sub> Cs <sub>2</sub> Pt, Br <sub>6</sub> Cs <sub>2</sub> Sn, Br <sub>6</sub> Cs <sub>2</sub> Te, Br <sub>6</sub> Cs <sub>2</sub> U,<br>Br <sub>6</sub> K <sub>2</sub> Pt, Br <sub>6</sub> K <sub>2</sub> Se, Br <sub>6</sub> K <sub>2</sub> Sn, Br <sub>6</sub> K <sub>2</sub> Te, Br <sub>6</sub> PdRb <sub>2</sub> , Br <sub>6</sub> Rb <sub>2</sub> Sn, Br <sub>6</sub> Rb <sub>2</sub> Te, Br <sub>6</sub> Rb <sub>2</sub> U, Br <sub>8</sub> Li <sub>6</sub> Mg, CBe <sub>2</sub> ,<br>CGe,<br>CPd, CPt, CSi, CSn, CW, CZr, Ca, Ca <sub>11</sub> Ga <sub>7</sub> , CaF <sub>2</sub> , CaF <sub>6</sub> Pb, CaF <sub>6</sub> Sn,<br>CaMoO <sub>6</sub> Sr <sub>2</sub> , CaO, CaO <sub>3</sub> Sn, CaO <sub>6</sub> Sr <sub>2</sub> W, CaPo, CaS, CaSe, CaTe, Ca <sub>2</sub> Ge, Ca <sub>2</sub> O <sub>6</sub> SiTi, Ca <sub>2</sub> Pb,<br>Ca <sub>2</sub> Si, Ca <sub>2</sub> Sn, Ca <sub>3</sub> Cd <sub>8</sub> Pt <sub>4</sub> , Ca <sub>7</sub> Ge, CdCl <sub>8</sub> Na <sub>6</sub> , CdF <sub>2</sub> , CdO, CdO <sub>6</sub> Sr <sub>2</sub> W, CdS, CdSe, CdTe,<br>ClCs, ClK, ClNa, ClRb, ClTi, Cl <sub>2</sub> Sr, Cl <sub>6</sub> Cs <sub>2</sub> Ge, Cl <sub>6</sub> Cs <sub>2</sub> KSc, Cl <sub>6</sub> Cs <sub>2</sub> LiLu, Cl <sub>6</sub> Cs <sub>2</sub> LiY, Cl <sub>6</sub> Cs <sub>2</sub> NaY,<br>Cl <sub>6</sub> Cs <sub>2</sub> Pb, Cl <sub>6</sub> Cs <sub>2</sub> Pt, Cl <sub>6</sub> Cs <sub>2</sub> Se, Cl <sub>6</sub> Cs <sub>2</sub> Sn, Cl <sub>6</sub> Cs <sub>2</sub> Te, Cl <sub>6</sub> Cs <sub>2</sub> Ti, Cl <sub>6</sub> Cs <sub>2</sub> Zr, Cl <sub>6</sub> K <sub>2</sub> Pd, Cl <sub>6</sub> K <sub>2</sub> Pt, Cl <sub>6</sub> K <sub>2</sub> Sn,<br>Cl <sub>6</sub> K <sub>2</sub> Ti,<br>Cl <sub>6</sub> PbRb <sub>2</sub> , Cl <sub>6</sub> PtRb <sub>2</sub> , Cl <sub>6</sub> PtTl <sub>2</sub> , Cl <sub>6</sub> Rb <sub>2</sub> Se, Cl <sub>6</sub> Rb <sub>2</sub> Sn, Cl <sub>6</sub> Rb <sub>2</sub> Te, Cl <sub>6</sub> Rb <sub>2</sub> Ti, Cl <sub>6</sub> Rb <sub>2</sub> Zr, Cl <sub>6</sub> SnTl <sub>2</sub> ,<br>Cl <sub>6</sub> TeTl <sub>2</sub> , CsF <sub>3</sub> Tl,<br>CsI, CsK <sub>2</sub> Sb, Cs <sub>2</sub> F <sub>6</sub> Ge, Cs <sub>2</sub> F <sub>6</sub> InNa, Cs <sub>2</sub> F <sub>6</sub> KY, Cs <sub>2</sub> F <sub>6</sub> NaSc, Cs <sub>2</sub> F <sub>6</sub> NaTl, Cs <sub>2</sub> F <sub>6</sub> NaY, Cs <sub>2</sub> F <sub>6</sub> Pd, Cs <sub>2</sub> F <sub>6</sub> Pt,<br>Cs <sub>2</sub> F <sub>6</sub> RbY,<br>Cs <sub>2</sub> F <sub>6</sub> Si, Cs <sub>2</sub> HfI <sub>6</sub> , Cs <sub>2</sub> I <sub>6</sub> Pd, Cs <sub>2</sub> I <sub>6</sub> Po, Cs <sub>2</sub> I <sub>6</sub> Pt, Cs <sub>2</sub> I <sub>6</sub> Sn, Cs <sub>2</sub> I <sub>6</sub> Te, Cs <sub>3</sub> Sb, Cs <sub>6</sub> I <sub>8</sub> Re <sub>6</sub> S <sub>8</sub> , F <sub>10</sub> KY <sub>3</sub> , F <sub>2</sub> Hg,<br>F <sub>2</sub> Pb, F <sub>2</sub> Ra, F <sub>2</sub> Te, F <sub>3</sub> La, F <sub>6</sub> GaKRb <sub>2</sub> , F <sub>6</sub> GeRb <sub>2</sub> , F <sub>6</sub> HfK <sub>2</sub> , F <sub>6</sub> InKRb <sub>2</sub> , F <sub>6</sub> InK <sub>2</sub> Na, F <sub>6</sub> K <sub>2</sub> NaSc, F <sub>6</sub> K <sub>2</sub> NaTl,<br>F <sub>6</sub> K <sub>2</sub> NaY, F <sub>6</sub> K <sub>2</sub> Si, F <sub>6</sub> NaRb <sub>2</sub> Y, F <sub>6</sub> NaSb, F <sub>6</sub> O <sub>4</sub> PbZr <sub>3</sub> , F <sub>6</sub> PdRb <sub>2</sub> , F <sub>6</sub> Rb <sub>2</sub> Si, F <sub>6</sub> SiTl <sub>2</sub> , F <sub>6</sub> Sn <sub>2</sub> , GaLiMg <sub>2</sub> ,<br>GaN,<br>GaO <sub>6</sub> SbSr <sub>2</sub> , Ga <sub>2</sub> In <sub>6</sub> O <sub>8</sub> Pt, Ga <sub>4</sub> In <sub>3</sub> Sr <sub>11</sub> , Ge, GeMg <sub>2</sub> , GeTe, GeTh, Ge <sub>2</sub> In <sub>6</sub> O <sub>9</sub> Pt, He, HfO <sub>2</sub> , HgP <sub>2</sub> Si,<br>HgS, IK, ILi, IRb, ITl, I <sub>6</sub> PdRb <sub>2</sub> , I <sub>6</sub> Rb <sub>2</sub> Sn, InN, InO <sub>6</sub> Sr <sub>2</sub> Ta, In <sub>7</sub> Sr <sub>11</sub> , KNa <sub>2</sub> Sb,<br>LaP, LaSb, LiMg <sub>2</sub> Tl, Li <sub>2</sub> MgSi, Li <sub>2</sub> NaSb, Li <sub>2</sub> O, Li <sub>2</sub> S, Li <sub>2</sub> Se, Li <sub>2</sub> Te, Li <sub>3</sub> Sb, Li <sub>4</sub> N <sub>2</sub> Na <sub>2</sub> ,<br>LuN, LuSb, MgO, MgO <sub>6</sub> Pb <sub>2</sub> Te, MgO <sub>6</sub> Pb <sub>2</sub> W, MgO <sub>6</sub> Sr <sub>2</sub> W, MgS, MgSe, MgTe, Mg <sub>2</sub> Si, Mg <sub>2</sub> Sn,<br>MoO <sub>6</sub> Sr <sub>2</sub> Zn, NPa, NSc, N <sub>2</sub> Pd, Na <sub>2</sub> S, Na <sub>2</sub> Se, Na <sub>2</sub> Te, Na <sub>6</sub> O <sub>9</sub> S <sub>2</sub> , OSr, OZn, O <sub>2</sub> Si,<br>O <sub>2</sub> Sn, O <sub>2</sub> Ti, O <sub>2</sub> U, O <sub>2</sub> Zr, O <sub>4</sub> Pd <sub>3</sub> Tl, O <sub>6</sub> SbSr <sub>2</sub> Y, O <sub>6</sub> Sr <sub>2</sub> TaY, O <sub>6</sub> Sr <sub>2</sub> WZn, PSc, Pb, PbPo,<br>PbS, PbSe, PbTe, PoSr, RaS, RaSe, Rb <sub>2</sub> S, Rb <sub>2</sub> Se, Rb <sub>2</sub> Te, Rn, SSn,<br>SSr, |

Part 25 of all the predicted materials with band crossings from **Cases 1** or **2**:

|            |                                                                                                                                                                                                                                                                                                                                                                                                                                                                                                                                                                                                                                                                                                                                                                                                                                                                                                                                                                                                                                                                                                                                                                                                                                                                                                                                                                                                                                                                                                                                                                                                                                                                                                                                                                                                                                                                                                                                                                                                                                                                                                                                                                                                                                                                                                                                                                                                                                                                                                                                                                                                                                                                                                                                                                                                                                                                                                                                                                                                                                                                                                                                                                                                                                                                                                                                                                                                                                                                                                                                                                                                                                                                                                                                                                                                                                                                                                                                                                                                                                                                                                                                                                                                                                                                                                                                                                                                                                                                                                                                                                                                                                                                                                                                                                                                                 |
|------------|-----------------------------------------------------------------------------------------------------------------------------------------------------------------------------------------------------------------------------------------------------------------------------------------------------------------------------------------------------------------------------------------------------------------------------------------------------------------------------------------------------------------------------------------------------------------------------------------------------------------------------------------------------------------------------------------------------------------------------------------------------------------------------------------------------------------------------------------------------------------------------------------------------------------------------------------------------------------------------------------------------------------------------------------------------------------------------------------------------------------------------------------------------------------------------------------------------------------------------------------------------------------------------------------------------------------------------------------------------------------------------------------------------------------------------------------------------------------------------------------------------------------------------------------------------------------------------------------------------------------------------------------------------------------------------------------------------------------------------------------------------------------------------------------------------------------------------------------------------------------------------------------------------------------------------------------------------------------------------------------------------------------------------------------------------------------------------------------------------------------------------------------------------------------------------------------------------------------------------------------------------------------------------------------------------------------------------------------------------------------------------------------------------------------------------------------------------------------------------------------------------------------------------------------------------------------------------------------------------------------------------------------------------------------------------------------------------------------------------------------------------------------------------------------------------------------------------------------------------------------------------------------------------------------------------------------------------------------------------------------------------------------------------------------------------------------------------------------------------------------------------------------------------------------------------------------------------------------------------------------------------------------------------------------------------------------------------------------------------------------------------------------------------------------------------------------------------------------------------------------------------------------------------------------------------------------------------------------------------------------------------------------------------------------------------------------------------------------------------------------------------------------------------------------------------------------------------------------------------------------------------------------------------------------------------------------------------------------------------------------------------------------------------------------------------------------------------------------------------------------------------------------------------------------------------------------------------------------------------------------------------------------------------------------------------------------------------------------------------------------------------------------------------------------------------------------------------------------------------------------------------------------------------------------------------------------------------------------------------------------------------------------------------------------------------------------------------------------------------------------------------------------------------------------------------------------|
| <b>225</b> | SbSc, SbY, SeSn, SeSr, SeU, SnTe, SrTe, TeU, TeZn, W,<br>Xe, Y <sub>6</sub> Zn <sub>23</sub> ,                                                                                                                                                                                                                                                                                                                                                                                                                                                                                                                                                                                                                                                                                                                                                                                                                                                                                                                                                                                                                                                                                                                                                                                                                                                                                                                                                                                                                                                                                                                                                                                                                                                                                                                                                                                                                                                                                                                                                                                                                                                                                                                                                                                                                                                                                                                                                                                                                                                                                                                                                                                                                                                                                                                                                                                                                                                                                                                                                                                                                                                                                                                                                                                                                                                                                                                                                                                                                                                                                                                                                                                                                                                                                                                                                                                                                                                                                                                                                                                                                                                                                                                                                                                                                                                                                                                                                                                                                                                                                                                                                                                                                                                                                                                  |
| <b>227</b> | AgO <sub>3</sub> Sb, Ag <sub>2</sub> MoO <sub>4</sub> , Ag <sub>2</sub> O <sub>6</sub> Sb <sub>2</sub> , Ag <sub>3</sub> NaS <sub>2</sub> , Ag <sub>6</sub> K <sub>2</sub> S <sub>4</sub> , Al <sub>18</sub> Mg <sub>3</sub> Mo <sub>2</sub> , Al <sub>18</sub> Mg <sub>3</sub> W <sub>2</sub> , AlCsO <sub>2</sub> , AlLi, AlO <sub>2</sub> Rb,<br>Al <sub>2</sub> Ba, Al <sub>2</sub> Ca, Al <sub>2</sub> CdO <sub>4</sub> , Al <sub>2</sub> CdSe <sub>4</sub> , Al <sub>2</sub> ClF <sub>25</sub> Sr <sub>10</sub> , Al <sub>2</sub> O <sub>4</sub> Zn, Al <sub>2</sub> Se <sub>4</sub> Zn, Al <sub>2</sub> Sr, Al <sub>2</sub> Th, As <sub>2</sub> O <sub>3</sub> , As <sub>4</sub> He <sub>2</sub> O <sub>6</sub> ,<br>As <sub>4</sub> Na <sub>8</sub> Ti, As <sub>4</sub> O <sub>6</sub> , BLi, Ba <sub>21</sub> O <sub>5</sub> Si <sub>2</sub> , Ba <sub>2</sub> Ge <sub>4</sub> S <sub>10</sub> , Be <sub>2</sub> Ti, Bi <sub>2</sub> O <sub>3</sub> , Bi <sub>2</sub> O <sub>7</sub> Pt <sub>2</sub> , Bi <sub>2</sub> O <sub>7</sub> Sn <sub>2</sub> , Bi <sub>2</sub> O <sub>7</sub> Ti <sub>2</sub> ,<br>CBr <sub>3</sub> LiN <sub>2</sub> Sr <sub>2</sub> ,<br>CNb <sub>4</sub> Zn <sub>2</sub> , CTi, CTi <sub>2</sub> , C <sub>3</sub> N <sub>4</sub> , C <sub>3</sub> Nb <sub>8</sub> Zn <sub>4</sub> , C <sub>4</sub> F <sub>12</sub> Ge <sub>4</sub> S <sub>6</sub> , Ca <sub>2</sub> Nb <sub>2</sub> O <sub>7</sub> , Ca <sub>2</sub> O <sub>7</sub> Sb <sub>2</sub> , Ca <sub>2</sub> O <sub>7</sub> Ta <sub>2</sub> , CdGa <sub>2</sub> O <sub>4</sub> ,<br>CdIn <sub>2</sub> O <sub>4</sub> ,<br>CdIn <sub>2</sub> S <sub>4</sub> , CdIn <sub>2</sub> Se <sub>4</sub> , CdLu <sub>2</sub> S <sub>4</sub> , CdLu <sub>2</sub> Se <sub>4</sub> , CdS <sub>4</sub> Sc <sub>2</sub> , CdS <sub>4</sub> Y <sub>2</sub> , CdSc <sub>2</sub> Se <sub>4</sub> , CdSe <sub>4</sub> Y <sub>2</sub> , Cd <sub>2</sub> Nb <sub>2</sub> O <sub>7</sub> , Cd <sub>2</sub> O <sub>4</sub> Si,<br>Cd <sub>2</sub> O <sub>4</sub> Sn,<br>Cd <sub>2</sub> O <sub>7</sub> Re <sub>2</sub> , Cd <sub>2</sub> O <sub>7</sub> Ta <sub>2</sub> , Cl <sub>4</sub> Li <sub>2</sub> Zn, CsN <sub>2</sub> Nb, F <sub>6</sub> Hg <sub>2</sub> OZn <sub>2</sub> , GaLi, Ga <sub>2</sub> MgO <sub>4</sub> , Ga <sub>2</sub> O <sub>4</sub> Zn, Ge <sub>136</sub> , GeMg <sub>2</sub> ,<br>GeMg <sub>2</sub> O <sub>4</sub> ,<br>Ge <sub>3</sub> N <sub>4</sub> , HfZn <sub>2</sub> , Hf <sub>2</sub> La <sub>2</sub> O <sub>7</sub> , Hf <sub>2</sub> O <sub>7</sub> Y <sub>2</sub> , Hf <sub>2</sub> Pd, Hf <sub>3</sub> NZn <sub>3</sub> , HgIn <sub>2</sub> S <sub>4</sub> , Hg <sub>2</sub> Nb <sub>2</sub> O <sub>7</sub> , Hg <sub>2</sub> O <sub>7</sub> Sb <sub>2</sub> , In <sub>2</sub> Mg, In <sub>2</sub> MgO <sub>4</sub> ,<br>In <sub>2</sub> O <sub>7</sub> Si <sub>2</sub> , In <sub>2</sub> S <sub>4</sub> Zn, In <sub>3</sub> Li <sub>13</sub> , KO <sub>3</sub> Sb, K <sub>8</sub> Sb <sub>4</sub> Sn, La <sub>2</sub> O <sub>7</sub> Sn <sub>2</sub> , La <sub>2</sub> O <sub>7</sub> Zr <sub>2</sub> , Lu <sub>2</sub> MgS <sub>4</sub> , Lu <sub>2</sub> MgSe <sub>4</sub> , Lu <sub>2</sub> O <sub>7</sub> Sn <sub>2</sub> ,<br>Lu <sub>2</sub> O <sub>7</sub> Ti <sub>2</sub> ,<br>MgS <sub>4</sub> Sc <sub>2</sub> , MgSc <sub>2</sub> Se <sub>4</sub> , MgSe <sub>4</sub> Y <sub>2</sub> , Mg <sub>2</sub> O <sub>4</sub> Si, Mg <sub>2</sub> O <sub>4</sub> Sn, Mg <sub>2</sub> Si, Mg <sub>2</sub> Sn, Mg <sub>2</sub> Th, MoNa <sub>2</sub> O <sub>4</sub> , Mo <sub>2</sub> O <sub>7</sub> Y <sub>2</sub> ,<br>NPd <sub>2</sub> Zr <sub>4</sub> ,<br>N <sub>4</sub> Si <sub>3</sub> , N <sub>4</sub> Sn <sub>3</sub> , NaTl, Na <sub>2</sub> O <sub>4</sub> W, Nb <sub>2</sub> O <sub>7</sub> Sn <sub>2</sub> , O <sub>3</sub> Sb <sub>2</sub> , O <sub>4</sub> SiZn <sub>2</sub> , O <sub>4</sub> SnZn <sub>2</sub> , O <sub>6</sub> Sb <sub>4</sub> , O <sub>7</sub> Sc <sub>2</sub> Si <sub>2</sub> , O <sub>7</sub> Sn <sub>2</sub> Ta <sub>2</sub> ,<br>O <sub>7</sub> Sn <sub>2</sub> Y <sub>2</sub> , O <sub>7</sub> Ti <sub>2</sub> Y <sub>2</sub> , Pd <sub>13</sub> Te <sub>3</sub> , S <sub>2</sub> Sn, S <sub>2</sub> Ti, S <sub>4</sub> Sc <sub>2</sub> Zn, S <sub>4</sub> Y <sub>2</sub> Zn, Se, Si <sub>136</sub> , Zn <sub>2</sub> Zr,<br>B <sub>3</sub> Ba <sub>4</sub> N <sub>6</sub> Na, Ba <sub>2</sub> K <sub>8</sub> O <sub>24</sub> U <sub>6</sub> , Ba <sub>4</sub> NaO <sub>12</sub> Sb <sub>3</sub> , Be, CaK <sub>4</sub> O <sub>12</sub> U <sub>3</sub> , Ca <sub>2</sub> K <sub>8</sub> O <sub>24</sub> U <sub>6</sub> , F <sub>6</sub> Mo, F <sub>6</sub> S, Ge, He,<br>Hg <sub>4</sub> Pt, K <sub>8</sub> O <sub>24</sub> Sr <sub>2</sub> U <sub>6</sub> , |
| <b>229</b> | B <sub>3</sub> Ba <sub>4</sub> N <sub>6</sub> Na, Ba <sub>2</sub> K <sub>8</sub> O <sub>24</sub> U <sub>6</sub> , Ba <sub>4</sub> NaO <sub>12</sub> Sb <sub>3</sub> , Be, CaK <sub>4</sub> O <sub>12</sub> U <sub>3</sub> , Ca <sub>2</sub> K <sub>8</sub> O <sub>24</sub> U <sub>6</sub> , F <sub>6</sub> Mo, F <sub>6</sub> S, Ge, He,<br>Hg <sub>4</sub> Pt, K <sub>8</sub> O <sub>24</sub> Sr <sub>2</sub> U <sub>6</sub> ,                                                                                                                                                                                                                                                                                                                                                                                                                                                                                                                                                                                                                                                                                                                                                                                                                                                                                                                                                                                                                                                                                                                                                                                                                                                                                                                                                                                                                                                                                                                                                                                                                                                                                                                                                                                                                                                                                                                                                                                                                                                                                                                                                                                                                                                                                                                                                                                                                                                                                                                                                                                                                                                                                                                                                                                                                                                                                                                                                                                                                                                                                                                                                                                                                                                                                                                                                                                                                                                                                                                                                                                                                                                                                                                                                                                                                                                                                                                                                                                                                                                                                                                                                                                                                                                                                                                                                                                 |
| <b>230</b> | Al <sub>2</sub> Cd <sub>3</sub> O <sub>12</sub> Si <sub>3</sub> , Al <sub>2</sub> F <sub>12</sub> Li <sub>3</sub> Na <sub>3</sub> , Al <sub>5</sub> O <sub>12</sub> Y <sub>3</sub> , Al <sub>5</sub> O <sub>12</sub> Y <sub>3</sub> , B <sub>3</sub> Ba <sub>4</sub> NaO <sub>9</sub> , Bi <sub>6</sub> BrKO <sub>9</sub> , Ca <sub>3</sub> Ga <sub>2</sub> Ge <sub>3</sub> O <sub>12</sub> ,<br>Ca <sub>3</sub> Ga <sub>2</sub> O <sub>12</sub> Si <sub>3</sub> , Ca <sub>3</sub> Ge <sub>3</sub> O <sub>12</sub> Sc <sub>2</sub> , Cd <sub>3</sub> Ge <sub>3</sub> O <sub>12</sub> Sc <sub>2</sub> ,<br>Ga <sub>3</sub> Na <sub>3</sub> O <sub>12</sub> Te <sub>2</sub> , Ga <sub>5</sub> O <sub>12</sub> Y <sub>3</sub> , Ge <sub>3</sub> O <sub>12</sub> Sr <sub>3</sub> Y <sub>2</sub> , Hg <sub>3</sub> O <sub>6</sub> Te, O <sub>2</sub> Si, O <sub>2</sub> Si,                                                                                                                                                                                                                                                                                                                                                                                                                                                                                                                                                                                                                                                                                                                                                                                                                                                                                                                                                                                                                                                                                                                                                                                                                                                                                                                                                                                                                                                                                                                                                                                                                                                                                                                                                                                                                                                                                                                                                                                                                                                                                                                                                                                                                                                                                                                                                                                                                                                                                                                                                                                                                                                                                                                                                                                                                                                                                                                                                                                                                                                                                                                                                                                                                                                                                                                                                                                                                                                                                                                                                                                                                                                                                                                                                                                                                                                                                                                                          |

## V. AI BASIS VECTORS FOR 230 SPACE GROUPS

$$\begin{pmatrix} \text{SG1} & a_1 \\ \nu & 2 \\ n_{\Gamma,1} & 1 \\ n_{X,1} & 1 \\ n_{Y,1} & 1 \\ n_{Z,1} & 1 \\ n_{U,1} & 1 \\ n_{T,1} & 1 \\ n_{S,1} & 1 \\ n_{R,1} & 1 \end{pmatrix} \quad (2)$$

$$\begin{pmatrix} \text{SG2} & a_1 & a_2 & a_3 & a_4 & a_5 & a_6 & a_7 & a_8 & a_9 \\ \nu & 4 & 2 & 2 & 2 & 2 & -4 & -4 & -4 & 8 \\ n_{\Gamma,1} & 1 & 1 & 1 & 1 & 1 & -2 & -2 & -2 & 4 \\ n_{\Gamma,2} & 1 & 0 & 0 & 0 & 0 & 0 & 0 & 0 & 0 \\ n_{X,1} & 1 & 1 & 0 & 1 & 0 & -2 & -2 & 0 & 4 \\ n_{X,2} & 1 & 0 & 1 & 0 & 1 & 0 & 0 & -2 & 0 \\ n_{Y,1} & 1 & 1 & 0 & 0 & 1 & -2 & 0 & -2 & 4 \\ n_{Y,2} & 1 & 0 & 1 & 1 & 0 & 0 & -2 & 0 & 0 \\ n_{Z,1} & 1 & 1 & 0 & 0 & 0 & 0 & 0 & 0 & 0 \\ n_{Z,2} & 1 & 0 & 1 & 1 & 1 & -2 & -2 & -2 & 4 \\ n_{U,1} & 1 & 1 & 1 & 0 & 0 & 0 & -2 & -2 & 4 \\ n_{U,2} & 1 & 0 & 0 & 1 & 1 & -2 & 0 & 0 & 0 \\ n_{T,1} & 1 & 1 & 1 & 1 & 0 & -2 & -2 & -2 & 4 \\ n_{T,2} & 1 & 0 & 0 & 0 & 1 & 0 & 0 & 0 & 0 \\ n_{S,1} & 1 & 1 & 1 & 0 & 1 & -2 & -2 & -2 & 4 \\ n_{S,2} & 1 & 0 & 0 & 1 & 0 & 0 & 0 & 0 & 0 \\ n_{R,1} & 1 & 1 & 0 & 1 & 1 & -2 & -2 & -2 & 4 \\ n_{R,2} & 1 & 0 & 1 & 0 & 0 & 0 & 0 & 0 & 0 \end{pmatrix} \tag{3}$$

$$\begin{pmatrix} \text{SG3} & a_1 \\ \nu & 2 \\ n_{\Gamma,1} & 1 \\ n_{\Gamma,2} & 1 \\ n_{B,1} & 1 \\ n_{B,2} & 1 \\ n_{Y,1} & 1 \\ n_{Y,2} & 1 \\ n_{Z,1} & 1 \\ n_{Z,2} & 1 \\ n_{C,1} & 1 \\ n_{C,2} & 1 \\ n_{D,1} & 1 \\ n_{D,2} & 1 \\ n_{A,1} & 1 \\ n_{A,2} & 1 \\ n_{E,1} & 1 \\ n_{E,2} & 1 \end{pmatrix} \tag{4}$$



$$\begin{pmatrix} \text{SG4} & a_1 \\ \nu & 4 \\ n_{\Gamma,1} & 2 \\ n_{\Gamma,2} & 2 \\ n_{\text{B},1} & 2 \\ n_{\text{B},2} & 2 \\ n_{\text{Y},1} & 2 \\ n_{\text{Y},2} & 2 \\ n_{\text{Z},1} & 1 \\ n_{\text{Z},2} & 1 \\ n_{\text{C},1} & 1 \\ n_{\text{C},2} & 1 \\ n_{\text{D},1} & 1 \\ n_{\text{D},2} & 1 \\ n_{\text{A},1} & 2 \\ n_{\text{A},2} & 2 \\ n_{\text{E},1} & 1 \\ n_{\text{E},2} & 1 \end{pmatrix} \quad (5)$$

$$\begin{pmatrix} \text{SG5} & a_1 \\ \nu & 2 \\ n_{\Gamma,1} & 1 \\ n_{\Gamma,2} & 1 \\ n_{\text{A},1} & 1 \\ n_{\text{A},2} & 1 \\ n_{\text{Z},1} & 1 \\ n_{\text{Z},2} & 1 \\ n_{\text{M},1} & 1 \\ n_{\text{M},2} & 1 \\ n_{\text{L},1} & 1 \\ n_{\text{V},1} & 1 \end{pmatrix} \quad (6)$$

$$\begin{pmatrix} \text{SG6} & a_1 \\ \nu & 2 \\ n_{\Gamma,1} & 1 \\ n_{\Gamma,2} & 1 \\ n_{\text{B},1} & 1 \\ n_{\text{B},2} & 1 \\ n_{\text{Y},1} & 1 \\ n_{\text{Y},2} & 1 \\ n_{\text{Z},1} & 1 \\ n_{\text{Z},2} & 1 \\ n_{\text{C},1} & 1 \\ n_{\text{C},2} & 1 \\ n_{\text{D},1} & 1 \\ n_{\text{D},2} & 1 \\ n_{\text{A},1} & 1 \\ n_{\text{A},2} & 1 \\ n_{\text{E},1} & 1 \\ n_{\text{E},2} & 1 \end{pmatrix} \quad (7)$$

$$\begin{pmatrix} \text{SG7} & a_1 \\ \nu & 4 \\ n_{\Gamma,1} & 2 \\ n_{\Gamma,2} & 2 \\ n_{\text{B},1} & 1 \\ n_{\text{B},2} & 1 \\ n_{\text{Y},1} & 2 \\ n_{\text{Y},2} & 2 \\ n_{\text{Z},1} & 2 \\ n_{\text{Z},2} & 2 \\ n_{\text{C},1} & 2 \\ n_{\text{C},2} & 2 \\ n_{\text{D},1} & 1 \\ n_{\text{D},2} & 1 \\ n_{\text{A},1} & 1 \\ n_{\text{A},2} & 1 \\ n_{\text{E},1} & 1 \\ n_{\text{E},2} & 1 \end{pmatrix} \tag{8}$$

$$\begin{pmatrix} \text{SG8} & a_1 \\ \nu & 2 \\ n_{\Gamma,1} & 1 \\ n_{\Gamma,2} & 1 \\ n_{\text{A},1} & 1 \\ n_{\text{A},2} & 1 \\ n_{\text{Z},1} & 1 \\ n_{\text{Z},2} & 1 \\ n_{\text{M},1} & 1 \\ n_{\text{M},2} & 1 \\ n_{\text{L},1} & 1 \\ n_{\text{V},1} & 1 \end{pmatrix} \tag{9}$$

$$\begin{pmatrix} \text{SG9} & a_1 \\ \nu & 4 \\ n_{\Gamma,1} & 2 \\ n_{\Gamma,2} & 2 \\ n_{\text{A},1} & 1 \\ n_{\text{A},2} & 1 \\ n_{\text{Z},1} & 2 \\ n_{\text{Z},2} & 2 \\ n_{\text{M},1} & 1 \\ n_{\text{M},2} & 1 \\ n_{\text{L},1} & 2 \\ n_{\text{V},1} & 2 \end{pmatrix} \tag{10}$$

$$\begin{pmatrix}
 \text{SG10} & a_1 & a_2 & a_3 & a_4 & a_5 & a_6 & a_7 & a_8 & a_9 \\
 \nu & 4 & 2 & 2 & 2 & 2 & -4 & -4 & -4 & 8 \\
 n_{\Gamma,1} & 1 & 1 & 1 & 1 & 1 & -2 & -2 & -2 & 4 \\
 n_{\Gamma,2} & 1 & 1 & 1 & 1 & 1 & -2 & -2 & -2 & 4 \\
 n_{\Gamma,3} & 1 & 0 & 0 & 0 & 0 & 0 & 0 & 0 & 0 \\
 n_{\Gamma,4} & 1 & 0 & 0 & 0 & 0 & 0 & 0 & 0 & 0 \\
 n_{B,1} & 1 & 0 & 0 & 0 & 1 & 0 & 0 & 0 & 0 \\
 n_{B,2} & 1 & 0 & 0 & 0 & 1 & 0 & 0 & 0 & 0 \\
 n_{B,3} & 1 & 1 & 1 & 1 & 0 & -2 & -2 & -2 & 4 \\
 n_{B,4} & 1 & 1 & 1 & 1 & 0 & -2 & -2 & -2 & 4 \\
 n_{Y,1} & 1 & 0 & 0 & 1 & 0 & 0 & 0 & 0 & 0 \\
 n_{Y,2} & 1 & 0 & 0 & 1 & 0 & 0 & 0 & 0 & 0 \\
 n_{Y,3} & 1 & 1 & 1 & 0 & 1 & -2 & -2 & -2 & 4 \\
 n_{Y,4} & 1 & 1 & 1 & 0 & 1 & -2 & -2 & -2 & 4 \\
 n_{Z,1} & 1 & 0 & 1 & 0 & 0 & 0 & 0 & 0 & 0 \\
 n_{Z,2} & 1 & 0 & 1 & 0 & 0 & 0 & 0 & 0 & 0 \\
 n_{Z,3} & 1 & 1 & 0 & 1 & 1 & -2 & -2 & -2 & 4 \\
 n_{Z,4} & 1 & 1 & 0 & 1 & 1 & -2 & -2 & -2 & 4 \\
 n_{C,1} & 1 & 1 & 0 & 0 & 1 & -2 & 0 & -2 & 4 \\
 n_{C,2} & 1 & 1 & 0 & 0 & 1 & -2 & 0 & -2 & 4 \\
 n_{C,3} & 1 & 0 & 1 & 1 & 0 & 0 & -2 & 0 & 0 \\
 n_{C,4} & 1 & 0 & 1 & 1 & 0 & 0 & -2 & 0 & 0 \\
 n_{D,1} & 1 & 1 & 0 & 1 & 0 & 0 & -2 & -2 & 4 \\
 n_{D,2} & 1 & 1 & 0 & 1 & 0 & 0 & -2 & -2 & 4 \\
 n_{D,3} & 1 & 0 & 1 & 0 & 1 & -2 & 0 & 0 & 0 \\
 n_{D,4} & 1 & 0 & 1 & 0 & 1 & -2 & 0 & 0 & 0 \\
 n_{A,1} & 1 & 1 & 1 & 0 & 0 & -2 & -2 & 0 & 4 \\
 n_{A,2} & 1 & 1 & 1 & 0 & 0 & -2 & -2 & 0 & 4 \\
 n_{A,3} & 1 & 0 & 0 & 1 & 1 & 0 & 0 & -2 & 0 \\
 n_{A,4} & 1 & 0 & 0 & 1 & 1 & 0 & 0 & -2 & 0 \\
 n_{E,1} & 1 & 0 & 1 & 1 & 1 & -2 & -2 & -2 & 4 \\
 n_{E,2} & 1 & 0 & 1 & 1 & 1 & -2 & -2 & -2 & 4 \\
 n_{E,3} & 1 & 1 & 0 & 0 & 0 & 0 & 0 & 0 & 0 \\
 n_{E,4} & 1 & 1 & 0 & 0 & 0 & 0 & 0 & 0 & 0
 \end{pmatrix}$$

(11)

$$\begin{pmatrix}
 \text{SG11} & a_1 & a_2 & a_3 & a_4 & a_5 \\
 \nu & 4 & 4 & 0 & 0 & 0 \\
 n_{\Gamma,1} & 1 & 2 & 0 & 0 & 0 \\
 n_{\Gamma,2} & 1 & 2 & 0 & 0 & 0 \\
 n_{\Gamma,3} & 1 & 0 & 0 & 0 & 0 \\
 n_{\Gamma,4} & 1 & 0 & 0 & 0 & 0 \\
 n_{\text{B},1} & 1 & 0 & 0 & 2 & 0 \\
 n_{\text{B},2} & 1 & 0 & 0 & 2 & 0 \\
 n_{\text{B},3} & 1 & 2 & 0 & -2 & 0 \\
 n_{\text{B},4} & 1 & 2 & 0 & -2 & 0 \\
 n_{\text{Y},1} & 1 & 0 & 2 & 0 & 0 \\
 n_{\text{Y},2} & 1 & 0 & 2 & 0 & 0 \\
 n_{\text{Y},3} & 1 & 2 & -2 & 0 & 0 \\
 n_{\text{Y},4} & 1 & 2 & -2 & 0 & 0 \\
 n_{\text{Z},1} & 1 & 1 & 0 & 0 & 0 \\
 n_{\text{C},1} & 1 & 1 & 0 & 0 & 0 \\
 n_{\text{D},1} & 1 & 1 & 0 & 0 & 0 \\
 n_{\text{A},1} & 1 & 2 & -2 & -2 & 4 \\
 n_{\text{A},2} & 1 & 2 & -2 & -2 & 4 \\
 n_{\text{A},3} & 1 & 0 & 2 & 2 & -4 \\
 n_{\text{A},4} & 1 & 0 & 2 & 2 & -4 \\
 n_{\text{E},1} & 1 & 1 & 0 & 0 & 0
 \end{pmatrix} \tag{12}$$

$$\begin{pmatrix}
 \text{SG12} & a_1 & a_2 & a_3 & a_4 & a_5 & a_6 & a_7 \\
 \nu & 4 & 4 & -8 & 2 & -4 & 8 & -8 \\
 n_{\Gamma,1} & 1 & 2 & -4 & 1 & -2 & 4 & -4 \\
 n_{\Gamma,2} & 1 & 2 & -4 & 1 & -2 & 4 & -4 \\
 n_{\Gamma,3} & 1 & 0 & 0 & 0 & 0 & 0 & 0 \\
 n_{\Gamma,4} & 1 & 0 & 0 & 0 & 0 & 0 & 0 \\
 n_{\text{A},1} & 1 & 0 & -1 & 0 & 0 & 2 & -4 \\
 n_{\text{A},2} & 1 & 0 & -1 & 0 & 0 & 2 & -4 \\
 n_{\text{A},3} & 1 & 2 & -3 & 1 & -2 & 2 & 0 \\
 n_{\text{A},4} & 1 & 2 & -3 & 1 & -2 & 2 & 0 \\
 n_{\text{Z},1} & 1 & 0 & -2 & 1 & 0 & 2 & -4 \\
 n_{\text{Z},2} & 1 & 0 & -2 & 1 & 0 & 2 & -4 \\
 n_{\text{Z},3} & 1 & 2 & -2 & 0 & -2 & 2 & 0 \\
 n_{\text{Z},4} & 1 & 2 & -2 & 0 & -2 & 2 & 0 \\
 n_{\text{M},1} & 1 & 2 & -3 & 0 & -2 & 4 & 0 \\
 n_{\text{M},2} & 1 & 2 & -3 & 0 & -2 & 4 & 0 \\
 n_{\text{M},3} & 1 & 0 & -1 & 1 & 0 & 0 & -4 \\
 n_{\text{M},4} & 1 & 0 & -1 & 1 & 0 & 0 & -4 \\
 n_{\text{L},1} & 1 & 1 & -1 & 1 & -2 & 0 & 0 \\
 n_{\text{L},2} & 1 & 1 & -3 & 0 & 0 & 4 & -4 \\
 n_{\text{V},1} & 1 & 1 & 0 & 0 & 0 & 0 & 0 \\
 n_{\text{V},2} & 1 & 1 & -4 & 1 & -2 & 4 & -4
 \end{pmatrix} \tag{13}$$

$$\begin{pmatrix}
 \text{SG13} & a_1 & a_2 & a_3 & a_4 & a_5 \\
 \nu & 4 & 4 & 0 & 0 & 0 \\
 n_{\Gamma,1} & 1 & 2 & 0 & 0 & 0 \\
 n_{\Gamma,2} & 1 & 2 & 0 & 0 & 0 \\
 n_{\Gamma,3} & 1 & 0 & 0 & 0 & 0 \\
 n_{\Gamma,4} & 1 & 0 & 0 & 0 & 0 \\
 n_{\text{B},1} & 1 & 1 & 0 & 0 & 0 \\
 n_{\text{Y},1} & 1 & 0 & 2 & 0 & 0 \\
 n_{\text{Y},2} & 1 & 0 & 2 & 0 & 0 \\
 n_{\text{Y},3} & 1 & 2 & -2 & 0 & 0 \\
 n_{\text{Y},4} & 1 & 2 & -2 & 0 & 0 \\
 n_{\text{Z},1} & 1 & 2 & -2 & -2 & 4 \\
 n_{\text{Z},2} & 1 & 2 & -2 & -2 & 4 \\
 n_{\text{Z},3} & 1 & 0 & 2 & 2 & -4 \\
 n_{\text{Z},4} & 1 & 0 & 2 & 2 & -4 \\
 n_{\text{C},1} & 1 & 0 & 0 & 2 & 0 \\
 n_{\text{C},2} & 1 & 0 & 0 & 2 & 0 \\
 n_{\text{C},3} & 1 & 2 & 0 & -2 & 0 \\
 n_{\text{C},4} & 1 & 2 & 0 & -2 & 0 \\
 n_{\text{D},1} & 1 & 1 & 0 & 0 & 0 \\
 n_{\text{A},1} & 1 & 1 & 0 & 0 & 0 \\
 n_{\text{E},1} & 1 & 1 & 0 & 0 & 0
 \end{pmatrix} \tag{14}$$

$$\begin{pmatrix}
 \text{SG14} & a_1 & a_2 & a_3 & a_4 & a_5 \\
 \nu & 8 & 4 & 4 & -8 & -16 \\
 n_{\Gamma,1} & 2 & 2 & 2 & -2 & -8 \\
 n_{\Gamma,2} & 2 & 2 & 2 & -2 & -8 \\
 n_{\Gamma,3} & 2 & 0 & 0 & -2 & 0 \\
 n_{\Gamma,4} & 2 & 0 & 0 & -2 & 0 \\
 n_{\text{B},1} & 2 & 1 & 1 & -2 & -4 \\
 n_{\text{Y},1} & 2 & 0 & 2 & -2 & -4 \\
 n_{\text{Y},2} & 2 & 0 & 2 & -2 & -4 \\
 n_{\text{Y},3} & 2 & 2 & 0 & -2 & -4 \\
 n_{\text{Y},4} & 2 & 2 & 0 & -2 & -4 \\
 n_{\text{Z},1} & 2 & 1 & 1 & -2 & -4 \\
 n_{\text{C},1} & 2 & 1 & 1 & -2 & -4 \\
 n_{\text{D},1} & 1 & 1 & 1 & -2 & -4 \\
 n_{\text{D},2} & 1 & 1 & 1 & -2 & -4 \\
 n_{\text{D},3} & 1 & 0 & 0 & 0 & 0 \\
 n_{\text{D},4} & 1 & 0 & 0 & 0 & 0 \\
 n_{\text{A},1} & 2 & 1 & 1 & -2 & -4 \\
 n_{\text{E},1} & 1 & 0 & 1 & 0 & -4 \\
 n_{\text{E},2} & 1 & 0 & 1 & 0 & -4 \\
 n_{\text{E},3} & 1 & 1 & 0 & -2 & 0 \\
 n_{\text{E},4} & 1 & 1 & 0 & -2 & 0
 \end{pmatrix} \tag{15}$$

$$\begin{pmatrix} \text{SG15} & a_1 & a_2 & a_3 & a_4 & a_5 \\ \nu & 4 & 4 & -12 & 16 & -16 \\ n_{\Gamma,1} & 1 & 2 & -6 & 8 & -8 \\ n_{\Gamma,2} & 1 & 2 & -6 & 8 & -8 \\ n_{\Gamma,3} & 1 & 0 & 0 & 0 & 0 \\ n_{\Gamma,4} & 1 & 0 & 0 & 0 & 0 \\ n_{A,1} & 1 & 1 & -3 & 4 & -4 \\ n_{Z,1} & 1 & 0 & -2 & 4 & -4 \\ n_{Z,2} & 1 & 0 & -2 & 4 & -4 \\ n_{Z,3} & 1 & 2 & -4 & 4 & -4 \\ n_{Z,4} & 1 & 2 & -4 & 4 & -4 \\ n_{M,1} & 1 & 1 & -3 & 4 & -4 \\ n_{L,1} & 1 & 2 & -5 & 6 & -4 \\ n_{L,2} & 1 & 0 & -1 & 2 & -4 \\ n_{V,1} & 1 & 1 & 0 & 0 & 0 \\ n_{V,2} & 1 & 1 & -6 & 8 & -8 \end{pmatrix} \tag{16}$$

$$\begin{pmatrix} \text{SG16} & a_1 \\ \nu & 2 \\ n_{\Gamma,1} & 1 \\ n_{Y,1} & 1 \\ n_{X,1} & 1 \\ n_{Z,1} & 1 \\ n_{U,1} & 1 \\ n_{T,1} & 1 \\ n_{S,1} & 1 \\ n_{R,1} & 1 \end{pmatrix} \tag{17}$$

$$\begin{pmatrix} \text{SG17} & a_1 \\ \nu & 4 \\ n_{\Gamma,1} & 2 \\ n_{Y,1} & 2 \\ n_{X,1} & 2 \\ n_{Z,1} & 1 \\ n_{Z,2} & 1 \\ n_{Z,3} & 1 \\ n_{Z,4} & 1 \\ n_{U,1} & 1 \\ n_{U,2} & 1 \\ n_{U,3} & 1 \\ n_{U,4} & 1 \\ n_{T,1} & 1 \\ n_{T,2} & 1 \\ n_{T,3} & 1 \\ n_{T,4} & 1 \\ n_{S,1} & 2 \\ n_{R,1} & 1 \\ n_{R,2} & 1 \\ n_{R,3} & 1 \\ n_{R,4} & 1 \end{pmatrix} \tag{18}$$

$$\begin{pmatrix} \text{SG18} & a_1 \\ \nu & 4 \\ n_{\Gamma,1} & 2 \\ n_{Y,1} & 1 \\ n_{Y,2} & 1 \\ n_{Y,3} & 1 \\ n_{Y,4} & 1 \\ n_{X,1} & 1 \\ n_{X,2} & 1 \\ n_{X,3} & 1 \\ n_{X,4} & 1 \\ n_{Z,1} & 2 \\ n_{U,1} & 1 \\ n_{U,2} & 1 \\ n_{U,3} & 1 \\ n_{U,4} & 1 \\ n_{T,1} & 1 \\ n_{T,2} & 1 \\ n_{T,3} & 1 \\ n_{T,4} & 1 \\ n_{S,1} & 1 \\ n_{R,1} & 1 \end{pmatrix} \tag{19}$$

$$\begin{pmatrix} \text{SG19} & a_1 \\ \nu & 8 \\ n_{\Gamma,1} & 4 \\ n_{Y,1} & 2 \\ n_{Y,2} & 2 \\ n_{Y,3} & 2 \\ n_{Y,4} & 2 \\ n_{X,1} & 2 \\ n_{X,2} & 2 \\ n_{X,3} & 2 \\ n_{X,4} & 2 \\ n_{Z,1} & 2 \\ n_{Z,2} & 2 \\ n_{Z,3} & 2 \\ n_{Z,4} & 2 \\ n_{U,1} & 2 \\ n_{T,1} & 2 \\ n_{S,1} & 2 \\ n_{R,1} & 1 \\ n_{R,2} & 1 \\ n_{R,3} & 1 \\ n_{R,4} & 1 \end{pmatrix} \tag{20}$$

$$\begin{pmatrix} \text{SG20} & a_1 \\ \nu & 4 \\ n_{\Gamma,1} & 2 \\ n_{\Upsilon,1} & 2 \\ n_{\mathbb{Z},1} & 1 \\ n_{\mathbb{Z},2} & 1 \\ n_{\mathbb{Z},3} & 1 \\ n_{\mathbb{Z},4} & 1 \\ n_{\mathbb{T},1} & 1 \\ n_{\mathbb{T},2} & 1 \\ n_{\mathbb{T},3} & 1 \\ n_{\mathbb{T},4} & 1 \\ n_{\mathbb{S},1} & 2 \\ n_{\mathbb{S},2} & 2 \\ n_{\mathbb{R},1} & 1 \\ n_{\mathbb{R},2} & 1 \end{pmatrix} \tag{21}$$

$$\begin{pmatrix} \text{SG21} & a_1 \\ \nu & 2 \\ n_{\Gamma,1} & 1 \\ n_{\Upsilon,1} & 1 \\ n_{\mathbb{Z},1} & 1 \\ n_{\mathbb{T},1} & 1 \\ n_{\mathbb{S},1} & 1 \\ n_{\mathbb{S},2} & 0 \\ n_{\mathbb{R},1} & 1 \\ n_{\mathbb{R},2} & 0 \end{pmatrix} \tag{22}$$

$$\begin{pmatrix} \text{SG22} & a_1 \\ \nu & 2 \\ n_{\Gamma,1} & 1 \\ n_{\Upsilon,1} & 1 \\ n_{\mathbb{X},1} & 1 \\ n_{\mathbb{Z},1} & 1 \\ n_{\mathbb{L},1} & 1 \end{pmatrix} \tag{23}$$

$$\begin{pmatrix} \text{SG23} & a_1 \\ \nu & 2 \\ n_{\Gamma,1} & 1 \\ n_{\mathbb{X},1} & 1 \\ n_{\mathbb{R},1} & 1 \\ n_{\mathbb{R},2} & 1 \\ n_{\mathbb{S},1} & 1 \\ n_{\mathbb{S},2} & 1 \\ n_{\mathbb{T},1} & 1 \\ n_{\mathbb{T},2} & 1 \\ n_{\mathbb{W},1} & 1 \end{pmatrix} \tag{24}$$



$$\left( \begin{array}{cc} \text{SG24} & a_1 \\ \nu & 4 \\ n_{\Gamma,1} & 2 \\ n_{X,1} & 2 \\ n_{R,1} & 2 \\ n_{R,2} & 2 \\ n_{S,1} & 2 \\ n_{S,2} & 2 \\ n_{T,1} & 2 \\ n_{T,2} & 2 \\ n_{W,1} & 1 \\ n_{W,2} & 1 \\ n_{W,3} & 1 \\ n_{W,4} & 1 \end{array} \right) \quad (25)$$

$$\left( \begin{array}{cc} \text{SG25} & a_1 \\ \nu & 2 \\ n_{\Gamma,1} & 1 \\ n_{Y,1} & 1 \\ n_{X,1} & 1 \\ n_{Z,1} & 1 \\ n_{U,1} & 1 \\ n_{T,1} & 1 \\ n_{S,1} & 1 \\ n_{R,1} & 1 \end{array} \right) \quad (26)$$

$$\left( \begin{array}{cc} \text{SG26} & a_1 \\ \nu & 2 \\ n_{\Gamma,1} & 1 \\ n_{Y,1} & 1 \\ n_{X,1} & 1 \\ n_{Z,1} & 1 \\ n_{U,1} & 1 \\ n_{T,1} & 1 \\ n_{S,1} & 1 \\ n_{R,1} & 1 \end{array} \right) \quad (27)$$

$$\left( \begin{array}{cc} \text{SG27} & a_1 \\ \nu & 2 \\ n_{\Gamma,1} & 1 \\ n_{Y,1} & 1 \\ n_{X,1} & 1 \\ n_{Z,1} & 1 \\ n_{U,1} & 1 \\ n_{T,1} & 1 \\ n_{S,1} & 1 \\ n_{R,1} & 1 \end{array} \right) \quad (28)$$

$$\begin{pmatrix} \text{SG28} & a_1 \\ \nu & 4 \\ n_{\Gamma,1} & 2 \\ n_{Y,1} & 1 \\ n_{Y,2} & 1 \\ n_{Y,3} & 1 \\ n_{Y,4} & 1 \\ n_{X,1} & 2 \\ n_{Z,1} & 2 \\ n_{U,1} & 2 \\ n_{T,1} & 1 \\ n_{T,2} & 1 \\ n_{T,3} & 1 \\ n_{T,4} & 1 \\ n_{S,1} & 1 \\ n_{S,2} & 1 \\ n_{S,3} & 1 \\ n_{S,4} & 1 \\ n_{R,1} & 1 \\ n_{R,2} & 1 \\ n_{R,3} & 1 \\ n_{R,4} & 1 \end{pmatrix} \tag{29}$$

$$\begin{pmatrix} \text{SG29} & a_1 \\ \nu & 8 \\ n_{\Gamma,1} & 4 \\ n_{Y,1} & 2 \\ n_{Y,2} & 2 \\ n_{Y,3} & 2 \\ n_{Y,4} & 2 \\ n_{X,1} & 4 \\ n_{Z,1} & 2 \\ n_{U,1} & 2 \\ n_{T,1} & 1 \\ n_{T,2} & 1 \\ n_{T,3} & 1 \\ n_{T,4} & 1 \\ n_{S,1} & 2 \\ n_{S,2} & 2 \\ n_{S,3} & 2 \\ n_{S,4} & 2 \\ n_{R,1} & 1 \\ n_{R,2} & 1 \\ n_{R,3} & 1 \\ n_{R,4} & 1 \end{pmatrix} \tag{30}$$

$$\begin{array}{r}
 \text{SG30} \quad a_1 \\
 \nu \quad 4 \\
 n_{\Gamma,1} \quad 2 \\
 n_{Y,1} \quad 1 \\
 n_{Y,2} \quad 1 \\
 n_{Y,3} \quad 1 \\
 n_{Y,4} \quad 1 \\
 n_{X,1} \quad 2 \\
 n_{Z,1} \quad 1 \\
 n_{U,1} \quad 1 \\
 n_{T,1} \quad 1 \\
 n_{T,2} \quad 1 \\
 n_{T,3} \quad 1 \\
 n_{T,4} \quad 1 \\
 n_{S,1} \quad 1 \\
 n_{S,2} \quad 1 \\
 n_{S,3} \quad 1 \\
 n_{S,4} \quad 1 \\
 n_{R,1} \quad 1 \\
 n_{R,2} \quad 1 \\
 n_{R,3} \quad 1 \\
 n_{R,4} \quad 1
 \end{array}
 \tag{31}$$

$$\begin{array}{r}
 \text{SG31} \quad a_1 \\
 \nu \quad 4 \\
 n_{\Gamma,1} \quad 2 \\
 n_{Y,1} \quad 1 \\
 n_{Y,2} \quad 1 \\
 n_{Y,3} \quad 1 \\
 n_{Y,4} \quad 1 \\
 n_{X,1} \quad 2 \\
 n_{Z,1} \quad 1 \\
 n_{U,1} \quad 1 \\
 n_{T,1} \quad 1 \\
 n_{T,2} \quad 1 \\
 n_{T,3} \quad 1 \\
 n_{T,4} \quad 1 \\
 n_{S,1} \quad 1 \\
 n_{S,2} \quad 1 \\
 n_{S,3} \quad 1 \\
 n_{S,4} \quad 1 \\
 n_{R,1} \quad 1 \\
 n_{R,2} \quad 1 \\
 n_{R,3} \quad 1 \\
 n_{R,4} \quad 1
 \end{array}
 \tag{32}$$

$$\begin{array}{r}
 \text{SG32} \quad a_1 \\
 \nu \quad 4 \\
 n_{\Gamma,1} \quad 2 \\
 n_{Y,1} \quad 1 \\
 n_{Y,2} \quad 1 \\
 n_{Y,3} \quad 1 \\
 n_{Y,4} \quad 1 \\
 n_{X,1} \quad 1 \\
 n_{X,2} \quad 1 \\
 n_{X,3} \quad 1 \\
 n_{X,4} \quad 1 \\
 n_{Z,1} \quad 2 \\
 n_{U,1} \quad 1 \\
 n_{U,2} \quad 1 \\
 n_{U,3} \quad 1 \\
 n_{U,4} \quad 1 \\
 n_{T,1} \quad 1 \\
 n_{T,2} \quad 1 \\
 n_{T,3} \quad 1 \\
 n_{T,4} \quad 1 \\
 n_{S,1} \quad 1 \\
 n_{R,1} \quad 1
 \end{array}
 \tag{33}$$

$$\begin{array}{r}
 \text{SG33} \quad a_1 \\
 \nu \quad 8 \\
 n_{\Gamma,1} \quad 4 \\
 n_{Y,1} \quad 2 \\
 n_{Y,2} \quad 2 \\
 n_{Y,3} \quad 2 \\
 n_{Y,4} \quad 2 \\
 n_{X,1} \quad 2 \\
 n_{X,2} \quad 2 \\
 n_{X,3} \quad 2 \\
 n_{X,4} \quad 2 \\
 n_{Z,1} \quad 2 \\
 n_{U,1} \quad 2 \\
 n_{U,2} \quad 2 \\
 n_{U,3} \quad 2 \\
 n_{U,4} \quad 2 \\
 n_{T,1} \quad 1 \\
 n_{T,2} \quad 1 \\
 n_{T,3} \quad 1 \\
 n_{T,4} \quad 1 \\
 n_{S,1} \quad 2 \\
 n_{R,1} \quad 2
 \end{array}
 \tag{34}$$

$$\begin{pmatrix} \text{SG34} & a_1 \\ \nu & 4 \\ n_{\Gamma,1} & 2 \\ n_{\Upsilon,1} & 1 \\ n_{\Upsilon,2} & 1 \\ n_{\Upsilon,3} & 1 \\ n_{\Upsilon,4} & 1 \\ n_{\text{X},1} & 1 \\ n_{\text{X},2} & 1 \\ n_{\text{X},3} & 1 \\ n_{\text{X},4} & 1 \\ n_{\text{Z},1} & 1 \\ n_{\text{U},1} & 1 \\ n_{\text{U},2} & 1 \\ n_{\text{U},3} & 1 \\ n_{\text{U},4} & 1 \\ n_{\text{T},1} & 1 \\ n_{\text{T},2} & 1 \\ n_{\text{T},3} & 1 \\ n_{\text{T},4} & 1 \\ n_{\text{S},1} & 1 \\ n_{\text{R},1} & 2 \end{pmatrix} \tag{35}$$

$$\begin{pmatrix} \text{SG35} & a_1 \\ \nu & 2 \\ n_{\Gamma,1} & 1 \\ n_{\Upsilon,1} & 1 \\ n_{\text{Z},1} & 1 \\ n_{\text{T},1} & 1 \\ n_{\text{S},1} & 1 \\ n_{\text{S},2} & 1 \\ n_{\text{R},1} & 1 \\ n_{\text{R},2} & 1 \end{pmatrix} \tag{36}$$

$$\begin{pmatrix} \text{SG36} & a_1 \\ \nu & 4 \\ n_{\Gamma,1} & 2 \\ n_{\Upsilon,1} & 2 \\ n_{\text{Z},1} & 1 \\ n_{\text{T},1} & 1 \\ n_{\text{S},1} & 2 \\ n_{\text{S},2} & 2 \\ n_{\text{R},1} & 1 \\ n_{\text{R},2} & 1 \end{pmatrix} \tag{37}$$

$$\left( \begin{array}{cc} \text{SG37} & a_1 \\ \nu & 4 \\ n_{\Gamma,1} & 2 \\ n_{\Upsilon,1} & 2 \\ n_{Z,1} & 1 \\ n_{T,1} & 1 \\ n_{S,1} & 2 \\ n_{S,2} & 2 \\ n_{R,1} & 2 \\ n_{R,2} & 2 \end{array} \right) \quad (38)$$

$$\left( \begin{array}{cc} \text{SG38} & a_1 \\ \nu & 2 \\ n_{\Gamma,1} & 1 \\ n_{\Upsilon,1} & 1 \\ n_{Z,1} & 1 \\ n_{T,1} & 1 \\ n_{S,1} & 1 \\ n_{S,2} & 1 \\ n_{R,1} & 1 \\ n_{R,2} & 1 \end{array} \right) \quad (39)$$

$$\left( \begin{array}{cc} \text{SG39} & a_1 \\ \nu & 4 \\ n_{\Gamma,1} & 2 \\ n_{\Upsilon,1} & 2 \\ n_{X,1} & 2 \\ n_{T,1} & 2 \\ n_{S,1} & 1 \\ n_{S,2} & 1 \\ n_{R,1} & 1 \\ n_{R,2} & 1 \end{array} \right) \quad (40)$$

$$\left( \begin{array}{cc} \text{SG40} & a_1 \\ \nu & 4 \\ n_{\Gamma,1} & 2 \\ n_{\Upsilon,1} & 2 \\ n_{Z,1} & 1 \\ n_{Z,2} & 1 \\ n_{Z,3} & 1 \\ n_{Z,4} & 1 \\ n_{T,1} & 1 \\ n_{T,2} & 1 \\ n_{T,3} & 1 \\ n_{T,4} & 1 \\ n_{S,1} & 2 \\ n_{S,2} & 2 \\ n_{R,1} & 2 \\ n_{R,2} & 2 \end{array} \right) \quad (41)$$

$$\left( \begin{array}{cc} \text{SG41} & a_1 \\ \nu & 4 \\ n_{\Gamma,1} & 2 \\ n_{Y,1} & 2 \\ n_{Z,1} & 1 \\ n_{Z,2} & 1 \\ n_{Z,3} & 1 \\ n_{Z,4} & 1 \\ n_{T,1} & 1 \\ n_{T,2} & 1 \\ n_{T,3} & 1 \\ n_{T,4} & 1 \\ n_{S,1} & 1 \\ n_{S,2} & 1 \\ n_{R,1} & 1 \\ n_{R,2} & 1 \end{array} \right) \quad (42)$$

$$\left( \begin{array}{cc} \text{SG42} & a_1 \\ \nu & 2 \\ n_{\Gamma,1} & 1 \\ n_{Y,1} & 1 \\ n_{X,1} & 1 \\ n_{Z,1} & 1 \\ n_{L,1} & 1 \end{array} \right) \quad (43)$$

$$\left( \begin{array}{cc} \text{SG43} & a_1 \\ \nu & 4 \\ n_{\Gamma,1} & 2 \\ n_{Y,1} & 1 \\ n_{Y,2} & 1 \\ n_{Y,3} & 1 \\ n_{Y,4} & 1 \\ n_{X,1} & 1 \\ n_{X,2} & 1 \\ n_{X,3} & 1 \\ n_{X,4} & 1 \\ n_{Z,1} & 1 \\ n_{L,1} & 2 \end{array} \right) \quad (44)$$

$$\left( \begin{array}{cc} \text{SG43} & a_1 \\ \nu & 2 \\ n_{\Gamma,1} & 1 \\ n_{X,1} & 1 \\ n_{R,1} & 1 \\ n_{R,2} & 1 \\ n_{S,1} & 1 \\ n_{S,2} & 1 \\ n_{T,1} & 1 \\ n_{T,2} & 1 \\ n_{W,1} & 1 \\ n_{W,2} & 1 \end{array} \right) \quad (45)$$

$$\begin{pmatrix} \text{SG45} & a_1 \\ \nu & 4 \\ n_{\Gamma,1} & 2 \\ n_{X,1} & 2 \\ n_{R,1} & 1 \\ n_{R,2} & 1 \\ n_{S,1} & 1 \\ n_{S,2} & 1 \\ n_{T,1} & 2 \\ n_{T,2} & 2 \\ n_{W,1} & 1 \\ n_{W,2} & 1 \end{pmatrix} \tag{46}$$

$$\begin{pmatrix} \text{SG46} & a_1 \\ \nu & 4 \\ n_{\Gamma,1} & 2 \\ n_{X,1} & 2 \\ n_{R,1} & 2 \\ n_{R,2} & 2 \\ n_{S,1} & 1 \\ n_{S,2} & 1 \\ n_{T,1} & 2 \\ n_{T,2} & 2 \\ n_{W,1} & 2 \\ n_{W,2} & 2 \end{pmatrix} \tag{47}$$

$$\begin{pmatrix} \text{SG47} & a_1 & a_2 & a_3 & a_4 & a_5 & a_6 & a_7 & a_8 & a_9 \\ \nu & 4 & 2 & 2 & 2 & -2 & 4 & -4 & -4 & 8 \\ n_{\Gamma,1} & 1 & 1 & 1 & 1 & -1 & 2 & -2 & -2 & 4 \\ n_{\Gamma,2} & 1 & 0 & 0 & 0 & 0 & 0 & 0 & 0 & 0 \\ n_{Y,1} & 1 & 0 & 1 & 0 & 0 & 0 & 0 & 0 & 0 \\ n_{Y,2} & 1 & 1 & 0 & 1 & -1 & 2 & -2 & -2 & 4 \\ n_{X,1} & 1 & 0 & 0 & 0 & 1 & 0 & 0 & 0 & 0 \\ n_{X,2} & 1 & 1 & 1 & 1 & -2 & 2 & -2 & -2 & 4 \\ n_{Z,1} & 1 & 0 & 0 & 1 & 0 & 0 & 0 & 0 & 0 \\ n_{Z,2} & 1 & 1 & 1 & 0 & -1 & 2 & -2 & -2 & 4 \\ n_{U,1} & 1 & 1 & 1 & 0 & 0 & 0 & -2 & 0 & 4 \\ n_{U,2} & 1 & 0 & 0 & 1 & -1 & 2 & 0 & -2 & 0 \\ n_{T,1} & 1 & 1 & 0 & 0 & 1 & 0 & -2 & -2 & 4 \\ n_{T,2} & 1 & 0 & 1 & 1 & -2 & 2 & 0 & 0 & 0 \\ n_{S,1} & 1 & 1 & 0 & 1 & 0 & 0 & 0 & -2 & 4 \\ n_{S,2} & 1 & 0 & 1 & 0 & -1 & 2 & -2 & 0 & 0 \\ n_{R,1} & 1 & 0 & 1 & 1 & -1 & 2 & -2 & -2 & 4 \\ n_{R,2} & 1 & 1 & 0 & 0 & 0 & 0 & 0 & 0 & 0 \end{pmatrix} \tag{48}$$



$$\begin{pmatrix}
 \text{SG48} & a_1 & a_2 & a_3 \\
 \nu & 4 & 8 & 0 \\
 n_{\Gamma,1} & 1 & 4 & 0 \\
 n_{\Gamma,2} & 1 & 0 & 0 \\
 n_{\Upsilon,1} & 1 & 2 & 0 \\
 n_{\Upsilon,2} & 1 & 2 & 0 \\
 n_{\chi,1} & 1 & 2 & 0 \\
 n_{\chi,2} & 1 & 2 & 0 \\
 n_{\zeta,1} & 1 & 2 & 0 \\
 n_{\zeta,2} & 1 & 2 & 0 \\
 n_{\text{U},1} & 1 & 2 & 0 \\
 n_{\text{U},2} & 1 & 2 & 0 \\
 n_{\text{T},1} & 1 & 2 & 0 \\
 n_{\text{T},2} & 1 & 2 & 0 \\
 n_{\text{S},1} & 1 & 2 & 0 \\
 n_{\text{S},2} & 1 & 2 & 0 \\
 n_{\text{R},1} & 1 & 4 & -4 \\
 n_{\text{R},2} & 1 & 0 & 4
 \end{pmatrix}
 \tag{49}$$

$$\begin{pmatrix}
 \text{SG49} & a_1 & a_2 & a_3 & a_4 & a_5 \\
 \nu & 4 & 4 & 0 & 0 & 0 \\
 n_{\Gamma,1} & 1 & 2 & 0 & 0 & 0 \\
 n_{\Gamma,2} & 1 & 0 & 0 & 0 & 0 \\
 n_{\Upsilon,1} & 1 & 2 & -2 & -2 & 4 \\
 n_{\Upsilon,2} & 1 & 0 & 2 & 2 & -4 \\
 n_{\chi,1} & 1 & 0 & 2 & 0 & 0 \\
 n_{\chi,2} & 1 & 2 & -2 & 0 & 0 \\
 n_{\zeta,1} & 1 & 1 & 0 & 0 & 0 \\
 n_{\zeta,2} & 1 & 1 & 0 & 0 & 0 \\
 n_{\text{U},1} & 1 & 1 & 0 & 0 & 0 \\
 n_{\text{U},2} & 1 & 1 & 0 & 0 & 0 \\
 n_{\text{T},1} & 1 & 1 & 0 & 0 & 0 \\
 n_{\text{T},2} & 1 & 1 & 0 & 0 & 0 \\
 n_{\text{S},1} & 1 & 0 & 0 & 2 & 0 \\
 n_{\text{S},2} & 1 & 2 & 0 & -2 & 0 \\
 n_{\text{R},1} & 1 & 1 & 0 & 0 & 0 \\
 n_{\text{R},2} & 1 & 1 & 0 & 0 & 0
 \end{pmatrix}
 \tag{50}$$

$$\begin{pmatrix} \text{SG50} & a_1 & a_2 & a_3 \\ \nu & 4 & 8 & 0 \\ n_{\Gamma,1} & 1 & 4 & 0 \\ n_{\Gamma,2} & 1 & 0 & 0 \\ n_{\Upsilon,1} & 1 & 2 & 0 \\ n_{\Upsilon,2} & 1 & 2 & 0 \\ n_{\chi,1} & 1 & 2 & 0 \\ n_{\chi,2} & 1 & 2 & 0 \\ n_{\mathcal{Z},1} & 1 & 0 & 4 \\ n_{\mathcal{Z},2} & 1 & 4 & -4 \\ n_{\mathcal{U},1} & 1 & 2 & 0 \\ n_{\mathcal{U},2} & 1 & 2 & 0 \\ n_{\mathcal{T},1} & 1 & 2 & 0 \\ n_{\mathcal{T},2} & 1 & 2 & 0 \\ n_{\mathcal{S},1} & 1 & 2 & 0 \\ n_{\mathcal{S},2} & 1 & 2 & 0 \\ n_{\mathcal{R},1} & 1 & 2 & 0 \\ n_{\mathcal{R},2} & 1 & 2 & 0 \end{pmatrix} \tag{51}$$

$$\begin{pmatrix} \text{SG51} & a_1 & a_2 & a_3 & a_4 & a_5 \\ \nu & 4 & 4 & 0 & 0 & 0 \\ n_{\Gamma,1} & 1 & 2 & 0 & 0 & 0 \\ n_{\Gamma,2} & 1 & 0 & 0 & 0 & 0 \\ n_{\Upsilon,1} & 1 & 0 & 2 & 0 & 0 \\ n_{\Upsilon,2} & 1 & 2 & -2 & 0 & 0 \\ n_{\chi,1} & 1 & 0 & 0 & 2 & 0 \\ n_{\chi,2} & 1 & 2 & 0 & -2 & 0 \\ n_{\mathcal{Z},1} & 1 & 1 & 0 & 0 & 0 \\ n_{\mathcal{Z},2} & 1 & 1 & 0 & 0 & 0 \\ n_{\mathcal{U},1} & 1 & 1 & 0 & 0 & 0 \\ n_{\mathcal{U},2} & 1 & 1 & 0 & 0 & 0 \\ n_{\mathcal{T},1} & 1 & 1 & 0 & 0 & 0 \\ n_{\mathcal{T},2} & 1 & 1 & 0 & 0 & 0 \\ n_{\mathcal{S},1} & 1 & 2 & -2 & -2 & 4 \\ n_{\mathcal{S},2} & 1 & 0 & 2 & 2 & -4 \\ n_{\mathcal{R},1} & 1 & 1 & 0 & 0 & 0 \\ n_{\mathcal{R},2} & 1 & 1 & 0 & 0 & 0 \end{pmatrix} \tag{52}$$

$$\begin{pmatrix}
 \text{SG52} & a_1 & a_2 & a_3 \\
 \nu & 8 & 8 & -32 \\
 n_{\Gamma,1} & 2 & 4 & -12 \\
 n_{\Gamma,2} & 2 & 0 & -4 \\
 n_{Y,1} & 2 & 2 & -8 \\
 n_{Y,2} & 2 & 2 & -8 \\
 n_{X,1} & 2 & 2 & -8 \\
 n_{X,2} & 2 & 2 & -8 \\
 n_{Z,1} & 2 & 2 & -8 \\
 n_{Z,2} & 2 & 2 & -8 \\
 n_{U,1} & 1 & 1 & -4 \\
 n_{U,2} & 1 & 1 & -4 \\
 n_{T,1} & 1 & 0 & 0 \\
 n_{T,2} & 1 & 0 & 0 \\
 n_{T,3} & 1 & 0 & 0 \\
 n_{T,4} & 1 & 0 & 0 \\
 n_{T,5} & 1 & 2 & -8 \\
 n_{T,6} & 1 & 2 & -8 \\
 n_{T,7} & 1 & 2 & -8 \\
 n_{T,8} & 1 & 2 & -8 \\
 n_{S,1} & 2 & 2 & -8 \\
 n_{S,2} & 2 & 2 & -8 \\
 n_{R,1} & 2 & 2 & -8 \\
 n_{R,2} & 2 & 2 & -8
 \end{pmatrix} \tag{53}$$

$$\begin{pmatrix}
 \text{SG53} & a_1 & a_2 & a_3 & a_4 & a_5 \\
 \nu & 8 & 4 & -20 & 24 & -16 \\
 n_{\Gamma,1} & 2 & 2 & -8 & 10 & -8 \\
 n_{\Gamma,2} & 2 & 0 & -2 & 2 & 0 \\
 n_{Y,1} & 2 & 1 & -5 & 6 & -4 \\
 n_{Y,2} & 2 & 1 & -5 & 6 & -4 \\
 n_{X,1} & 2 & 0 & -4 & 6 & -4 \\
 n_{X,2} & 2 & 2 & -6 & 6 & -4 \\
 n_{Z,1} & 2 & 1 & -5 & 6 & -4 \\
 n_{Z,2} & 2 & 1 & -5 & 6 & -4 \\
 n_{U,1} & 2 & 1 & -5 & 6 & -4 \\
 n_{U,2} & 2 & 1 & -5 & 6 & -4 \\
 n_{T,1} & 1 & 0 & -3 & 4 & -4 \\
 n_{T,2} & 1 & 0 & -3 & 4 & -4 \\
 n_{T,3} & 1 & 0 & -3 & 4 & -4 \\
 n_{T,4} & 1 & 0 & -3 & 4 & -4 \\
 n_{T,5} & 1 & 1 & -2 & 2 & 0 \\
 n_{T,6} & 1 & 1 & -2 & 2 & 0 \\
 n_{T,7} & 1 & 1 & -2 & 2 & 0 \\
 n_{T,8} & 1 & 1 & -2 & 2 & 0 \\
 n_{S,1} & 2 & 1 & -5 & 6 & -4 \\
 n_{S,2} & 2 & 1 & -5 & 6 & -4 \\
 n_{R,1} & 1 & 1 & -5 & 6 & -4 \\
 n_{R,2} & 1 & 1 & -5 & 6 & -4 \\
 n_{R,3} & 1 & 1 & -5 & 6 & -4 \\
 n_{R,4} & 1 & 1 & -5 & 6 & -4 \\
 n_{R,5} & 1 & 0 & 0 & 0 & 0 \\
 n_{R,6} & 1 & 0 & 0 & 0 & 0 \\
 n_{R,7} & 1 & 0 & 0 & 0 & 0 \\
 n_{R,8} & 1 & 0 & 0 & 0 & 0
 \end{pmatrix} \tag{54}$$

$$\begin{pmatrix} \text{SG54} & a_1 & a_2 & a_3 \\ \nu & 8 & 0 & 0 \\ n_{\Gamma,1} & 2 & 2 & 0 \\ n_{\Gamma,2} & 2 & -2 & 0 \\ n_{Y,1} & 2 & -2 & 4 \\ n_{Y,2} & 2 & 2 & -4 \\ n_{X,1} & 2 & 0 & 0 \\ n_{X,2} & 2 & 0 & 0 \\ n_{Z,1} & 2 & 0 & 0 \\ n_{Z,2} & 2 & 0 & 0 \\ n_{U,1} & 1 & 0 & 0 \\ n_{U,2} & 1 & 0 & 0 \\ n_{T,1} & 2 & 0 & 0 \\ n_{T,2} & 2 & 0 & 0 \\ n_{S,1} & 2 & 0 & 0 \\ n_{S,2} & 2 & 0 & 0 \\ n_{R,1} & 1 & 0 & 0 \\ n_{R,2} & 1 & 0 & 0 \end{pmatrix} \tag{55}$$

$$\begin{pmatrix} \text{SG55} & a_1 & a_2 & a_3 & a_4 & a_5 \\ \nu & 8 & 4 & 4 & -8 & -16 \\ n_{\Gamma,1} & 2 & 2 & 2 & -2 & -8 \\ n_{\Gamma,2} & 2 & 0 & 0 & -2 & 0 \\ n_{Y,1} & 2 & 1 & 1 & -2 & -4 \\ n_{Y,2} & 2 & 1 & 1 & -2 & -4 \\ n_{X,1} & 2 & 1 & 1 & -2 & -4 \\ n_{X,2} & 2 & 1 & 1 & -2 & -4 \\ n_{Z,1} & 2 & 0 & 2 & -2 & -4 \\ n_{Z,2} & 2 & 2 & 0 & -2 & -4 \\ n_{U,1} & 2 & 1 & 1 & -2 & -4 \\ n_{U,2} & 2 & 1 & 1 & -2 & -4 \\ n_{T,1} & 2 & 1 & 1 & -2 & -4 \\ n_{T,2} & 2 & 1 & 1 & -2 & -4 \\ n_{S,1} & 1 & 0 & 0 & 0 & 0 \\ n_{S,2} & 1 & 1 & 1 & -2 & -4 \\ n_{R,1} & 1 & 1 & 0 & -2 & 0 \\ n_{R,2} & 1 & 0 & 1 & 0 & -4 \end{pmatrix} \tag{56}$$

$$\begin{array}{c}
 \text{SG56} \\
 \nu \\
 n_{\Gamma,1} \\
 n_{\Gamma,2} \\
 n_{Y,1} \\
 n_{Y,2} \\
 n_{X,1} \\
 n_{X,2} \\
 n_{Z,1} \\
 n_{Z,2} \\
 n_{U,1} \\
 n_{U,2} \\
 n_{T,1} \\
 n_{T,2} \\
 n_{S,1} \\
 n_{S,2} \\
 n_{R,1} \\
 n_{R,2}
 \end{array}
 \begin{array}{ccc}
 a_1 & a_2 & a_3 \\
 8 & 8 & -32 \\
 2 & 4 & -12 \\
 2 & 0 & -4 \\
 2 & 2 & -8 \\
 2 & 2 & -8 \\
 2 & 2 & -8 \\
 2 & 2 & -8 \\
 2 & 2 & -8 \\
 2 & 2 & -8 \\
 1 & 1 & -4 \\
 1 & 1 & -4 \\
 1 & 1 & -4 \\
 1 & 1 & -4 \\
 2 & 2 & -8 \\
 2 & 2 & -8 \\
 1 & 2 & -8 \\
 1 & 0 & 0
 \end{array}
 \right)
 \tag{57}$$

$$\begin{array}{c}
 \text{SG57} \\
 \nu \\
 n_{\Gamma,1} \\
 n_{\Gamma,2} \\
 n_{Y,1} \\
 n_{Y,2} \\
 n_{X,1} \\
 n_{X,2} \\
 n_{Z,1} \\
 n_{Z,2} \\
 n_{U,1} \\
 n_{U,2} \\
 n_{T,1} \\
 n_{T,2} \\
 n_{S,1} \\
 n_{S,2} \\
 n_{R,1} \\
 n_{R,2}
 \end{array}
 \begin{array}{ccc}
 a_1 & a_2 & a_3 \\
 8 & 0 & 0 \\
 2 & 2 & 0 \\
 2 & -2 & 0 \\
 2 & 0 & 0 \\
 2 & 0 & 0 \\
 2 & 0 & 0 \\
 2 & 0 & 0 \\
 2 & -2 & 4 \\
 2 & 2 & -4 \\
 2 & 0 & 0 \\
 2 & 0 & 0 \\
 2 & 0 & 0 \\
 2 & 0 & 0 \\
 1 & 0 & 0 \\
 1 & 0 & 0 \\
 1 & 0 & 0 \\
 1 & 0 & 0
 \end{array}
 \right)
 \tag{58}$$

$$\begin{pmatrix}
 \text{SG58} & a_1 & a_2 & a_3 & a_4 & a_5 \\
 \nu & 8 & 4 & 4 & 4 & -48 \\
 n_{\Gamma,1} & 2 & 2 & 2 & 2 & -20 \\
 n_{\Gamma,2} & 2 & 0 & 0 & 0 & -4 \\
 n_{Y,1} & 2 & 1 & 1 & 1 & -12 \\
 n_{Y,2} & 2 & 1 & 1 & 1 & -12 \\
 n_{X,1} & 2 & 1 & 1 & 1 & -12 \\
 n_{X,2} & 2 & 1 & 1 & 1 & -12 \\
 n_{Z,1} & 2 & 1 & 1 & 1 & -12 \\
 n_{Z,2} & 2 & 1 & 1 & 1 & -12 \\
 n_{U,1} & 1 & 1 & 0 & 1 & -8 \\
 n_{U,2} & 1 & 1 & 0 & 1 & -8 \\
 n_{U,3} & 1 & 1 & 0 & 1 & -8 \\
 n_{U,4} & 1 & 1 & 0 & 1 & -8 \\
 n_{U,5} & 1 & 0 & 1 & 0 & -4 \\
 n_{U,6} & 1 & 0 & 1 & 0 & -4 \\
 n_{U,7} & 1 & 0 & 1 & 0 & -4 \\
 n_{U,8} & 1 & 0 & 1 & 0 & -4 \\
 n_{T,1} & 1 & 0 & 1 & 1 & -8 \\
 n_{T,2} & 1 & 0 & 1 & 1 & -8 \\
 n_{T,3} & 1 & 0 & 1 & 1 & -8 \\
 n_{T,4} & 1 & 0 & 1 & 1 & -8 \\
 n_{T,5} & 1 & 1 & 0 & 0 & -4 \\
 n_{T,6} & 1 & 1 & 0 & 0 & -4 \\
 n_{T,7} & 1 & 1 & 0 & 0 & -4 \\
 n_{T,8} & 1 & 1 & 0 & 0 & -4 \\
 n_{S,1} & 1 & 0 & 0 & 1 & -4 \\
 n_{S,2} & 1 & 1 & 1 & 0 & -8 \\
 n_{R,1} & 2 & 1 & 1 & 1 & -12 \\
 n_{R,2} & 2 & 1 & 1 & 1 & -12
 \end{pmatrix}
 \tag{59}$$

$$\begin{pmatrix}
 \text{SG59} & a_1 & a_2 & a_3 \\
 \nu & 4 & 8 & 0 \\
 n_{\Gamma,1} & 1 & 4 & 0 \\
 n_{\Gamma,2} & 1 & 0 & 0 \\
 n_{Y,1} & 1 & 2 & 0 \\
 n_{Y,2} & 1 & 2 & 0 \\
 n_{X,1} & 1 & 2 & 0 \\
 n_{X,2} & 1 & 2 & 0 \\
 n_{Z,1} & 1 & 0 & 4 \\
 n_{Z,2} & 1 & 4 & -4 \\
 n_{U,1} & 1 & 2 & 0 \\
 n_{U,2} & 1 & 2 & 0 \\
 n_{T,1} & 1 & 2 & 0 \\
 n_{T,2} & 1 & 2 & 0 \\
 n_{S,1} & 1 & 2 & 0 \\
 n_{S,2} & 1 & 2 & 0 \\
 n_{R,1} & 1 & 2 & 0 \\
 n_{R,2} & 1 & 2 & 0
 \end{pmatrix}
 \tag{60}$$

$$\begin{pmatrix}
 \text{SG60} & a_1 & a_2 & a_3 \\
 \nu & 8 & 8 & -32 \\
 n_{\Gamma,1} & 2 & 4 & -12 \\
 n_{\Gamma,2} & 2 & 0 & -4 \\
 n_{Y,1} & 2 & 2 & -8 \\
 n_{Y,2} & 2 & 2 & -8 \\
 n_{X,1} & 2 & 2 & -8 \\
 n_{X,2} & 2 & 2 & -8 \\
 n_{Z,1} & 2 & 2 & -8 \\
 n_{Z,2} & 2 & 2 & -8 \\
 n_{U,1} & 1 & 0 & 0 \\
 n_{U,2} & 1 & 0 & 0 \\
 n_{U,3} & 1 & 0 & 0 \\
 n_{U,4} & 1 & 0 & 0 \\
 n_{U,5} & 1 & 2 & -8 \\
 n_{U,6} & 1 & 2 & -8 \\
 n_{U,7} & 1 & 2 & -8 \\
 n_{U,8} & 1 & 2 & -8 \\
 n_{T,1} & 1 & 1 & -4 \\
 n_{T,2} & 1 & 1 & -4 \\
 n_{S,1} & 1 & 1 & -4 \\
 n_{S,2} & 1 & 1 & -4 \\
 n_{R,1} & 1 & 1 & -4 \\
 n_{R,2} & 1 & 1 & -4
 \end{pmatrix} \tag{61}$$

$$\begin{pmatrix}
 \text{SG61} & a_1 & a_2 & a_3 \\
 \nu & 16 & 8 & -32 \\
 n_{\Gamma,1} & 4 & 4 & -12 \\
 n_{\Gamma,2} & 4 & 0 & -4 \\
 n_{Y,1} & 4 & 2 & -8 \\
 n_{Y,2} & 4 & 2 & -8 \\
 n_{X,1} & 4 & 2 & -8 \\
 n_{X,2} & 4 & 2 & -8 \\
 n_{Z,1} & 4 & 2 & -8 \\
 n_{Z,2} & 4 & 2 & -8 \\
 n_{U,1} & 2 & 1 & -4 \\
 n_{U,2} & 2 & 1 & -4 \\
 n_{T,1} & 2 & 1 & -4 \\
 n_{T,2} & 2 & 1 & -4 \\
 n_{S,1} & 2 & 1 & -4 \\
 n_{S,2} & 2 & 1 & -4 \\
 n_{R,1} & 1 & 0 & 0 \\
 n_{R,2} & 1 & 0 & 0 \\
 n_{R,3} & 1 & 0 & 0 \\
 n_{R,4} & 1 & 0 & 0 \\
 n_{R,5} & 1 & 1 & -4 \\
 n_{R,6} & 1 & 1 & -4 \\
 n_{R,7} & 1 & 1 & -4 \\
 n_{R,8} & 1 & 1 & -4
 \end{pmatrix} \tag{62}$$

$$\begin{pmatrix} \text{SG62} & a_1 & a_2 & a_3 \\ \nu & 8 & 8 & -32 \\ n_{\Gamma,1} & 2 & 4 & -12 \\ n_{\Gamma,2} & 2 & 0 & -4 \\ n_{Y,1} & 2 & 2 & -8 \\ n_{Y,2} & 2 & 2 & -8 \\ n_{X,1} & 2 & 2 & -8 \\ n_{X,2} & 2 & 2 & -8 \\ n_{Z,1} & 2 & 2 & -8 \\ n_{Z,2} & 2 & 2 & -8 \\ n_{U,1} & 1 & 0 & 0 \\ n_{U,2} & 1 & 2 & -8 \\ n_{T,1} & 2 & 2 & -8 \\ n_{T,2} & 2 & 2 & -8 \\ n_{S,1} & 1 & 1 & -4 \\ n_{S,2} & 1 & 1 & -4 \\ n_{R,1} & 1 & 1 & -4 \\ n_{R,2} & 1 & 1 & -4 \end{pmatrix} \tag{63}$$

$$\begin{pmatrix} \text{SG63} & a_1 & a_2 & a_3 & a_4 \\ \nu & 4 & -4 & 8 & -16 \\ n_{\Gamma,1} & 1 & -2 & 4 & -8 \\ n_{\Gamma,2} & 1 & 0 & 0 & 0 \\ n_{Y,1} & 1 & -2 & 4 & -4 \\ n_{Y,2} & 1 & 0 & 0 & -4 \\ n_{Z,1} & 1 & -1 & 2 & -4 \\ n_{Z,2} & 1 & -1 & 2 & -4 \\ n_{T,1} & 1 & -1 & 2 & -4 \\ n_{T,2} & 1 & -1 & 2 & -4 \\ n_{S,1} & 1 & 2 & -2 & 0 \\ n_{S,2} & 1 & 2 & -2 & 0 \\ n_{S,3} & 1 & -4 & 6 & -8 \\ n_{S,4} & 1 & -4 & 6 & -8 \\ n_{R,1} & 1 & -1 & 2 & -4 \end{pmatrix} \tag{64}$$

$$\begin{pmatrix} \text{SG64} & a_1 & a_2 & a_3 & a_4 \\ \nu & 8 & -12 & 16 & -16 \\ n_{\Gamma,1} & 2 & -4 & 6 & -8 \\ n_{\Gamma,2} & 2 & -2 & 2 & 0 \\ n_{Y,1} & 2 & -4 & 6 & -4 \\ n_{Y,2} & 2 & -2 & 2 & -4 \\ n_{Z,1} & 2 & -3 & 4 & -4 \\ n_{Z,2} & 2 & -3 & 4 & -4 \\ n_{T,1} & 2 & -3 & 4 & -4 \\ n_{T,2} & 2 & -3 & 4 & -4 \\ n_{S,1} & 2 & -3 & 4 & -4 \\ n_{R,1} & 1 & 0 & 0 & 0 \\ n_{R,2} & 1 & 0 & 0 & 0 \\ n_{R,3} & 1 & -3 & 4 & -4 \\ n_{R,4} & 1 & -3 & 4 & -4 \end{pmatrix} \tag{65}$$



$$\begin{pmatrix} \text{SG65} & a_1 & a_2 & a_3 & a_4 & a_5 & a_6 & a_7 \\ \nu & 4 & 4 & -8 & 2 & -4 & 8 & -8 \\ n_{\Gamma,1} & 1 & 2 & -4 & 1 & -2 & 4 & -4 \\ n_{\Gamma,2} & 1 & 0 & 0 & 0 & 0 & 0 & 0 \\ n_{Y,1} & 1 & 0 & -2 & 1 & 0 & 2 & -4 \\ n_{Y,2} & 1 & 2 & -2 & 0 & -2 & 2 & 0 \\ n_{Z,1} & 1 & 0 & -1 & 0 & 0 & 2 & -4 \\ n_{Z,2} & 1 & 2 & -3 & 1 & -2 & 2 & 0 \\ n_{T,1} & 1 & 2 & -3 & 0 & -2 & 4 & 0 \\ n_{T,2} & 1 & 0 & -1 & 1 & 0 & 0 & -4 \\ n_{S,1} & 1 & 1 & -1 & 1 & -2 & 0 & 0 \\ n_{S,2} & 1 & 1 & -1 & 1 & -2 & 0 & 0 \\ n_{S,3} & 1 & 1 & -3 & 0 & 0 & 4 & -4 \\ n_{S,4} & 1 & 1 & -3 & 0 & 0 & 4 & -4 \\ n_{R,1} & 1 & 1 & 0 & 0 & 0 & 0 & 0 \\ n_{R,2} & 1 & 1 & 0 & 0 & 0 & 0 & 0 \\ n_{R,3} & 1 & 1 & -4 & 1 & -2 & 4 & -4 \\ n_{R,4} & 1 & 1 & -4 & 1 & -2 & 4 & -4 \end{pmatrix} \tag{66}$$

$$\begin{pmatrix} \text{SG66} & a_1 & a_2 & a_3 & a_4 & a_5 \\ \nu & 4 & 4 & -12 & 16 & -16 \\ n_{\Gamma,1} & 1 & 2 & -6 & 8 & -8 \\ n_{\Gamma,2} & 1 & 0 & 0 & 0 & 0 \\ n_{Y,1} & 1 & 0 & -2 & 4 & -4 \\ n_{Y,2} & 1 & 2 & -4 & 4 & -4 \\ n_{Z,1} & 1 & 1 & -3 & 4 & -4 \\ n_{Z,2} & 1 & 1 & -3 & 4 & -4 \\ n_{T,1} & 1 & 1 & -3 & 4 & -4 \\ n_{T,2} & 1 & 1 & -3 & 4 & -4 \\ n_{S,1} & 1 & 1 & 0 & 0 & 0 \\ n_{S,2} & 1 & 1 & 0 & 0 & 0 \\ n_{S,3} & 1 & 1 & -6 & 8 & -8 \\ n_{S,4} & 1 & 1 & -6 & 8 & -8 \\ n_{R,1} & 1 & 2 & -5 & 6 & -4 \\ n_{R,2} & 1 & 2 & -5 & 6 & -4 \\ n_{R,3} & 1 & 0 & -1 & 2 & -4 \\ n_{R,4} & 1 & 0 & -1 & 2 & -4 \end{pmatrix} \tag{67}$$

$$\begin{pmatrix} \text{SG67} & a_1 & a_2 & a_3 & a_4 & a_5 \\ \nu & 4 & 4 & 0 & 0 & 0 \\ n_{\Gamma,1} & 1 & 2 & 0 & 0 & 0 \\ n_{\Gamma,2} & 1 & 0 & 0 & 0 & 0 \\ n_{Y,1} & 1 & 0 & 0 & 2 & 0 \\ n_{Y,2} & 1 & 2 & 0 & -2 & 0 \\ n_{Z,1} & 1 & 0 & 2 & 0 & 0 \\ n_{Z,2} & 1 & 2 & -2 & 0 & 0 \\ n_{T,1} & 1 & 2 & -2 & -2 & 4 \\ n_{T,2} & 1 & 0 & 2 & 2 & -4 \\ n_{S,1} & 1 & 1 & 0 & 0 & 0 \\ n_{R,1} & 1 & 1 & 0 & 0 & 0 \end{pmatrix} \tag{68}$$

$$\begin{pmatrix} \text{SG68} & a_1 & a_2 & a_3 \\ \nu & 4 & 8 & 0 \\ n_{\Gamma,1} & 1 & 4 & 0 \\ n_{\Gamma,2} & 1 & 0 & 0 \\ n_{\Upsilon,1} & 1 & 0 & 4 \\ n_{\Upsilon,2} & 1 & 4 & -4 \\ n_{\text{Z},1} & 1 & 2 & 0 \\ n_{\text{Z},2} & 1 & 2 & 0 \\ n_{\text{T},1} & 1 & 2 & 0 \\ n_{\text{T},2} & 1 & 2 & 0 \\ n_{\text{S},1} & 1 & 2 & 0 \\ n_{\text{R},1} & 1 & 2 & 0 \end{pmatrix} \tag{69}$$

$$\begin{pmatrix} \text{SG69} & a_1 & a_2 & a_3 & a_4 & a_5 & a_6 \\ \nu & 4 & 4 & -6 & 0 & 8 & -8 \\ n_{\Gamma,1} & 1 & 2 & -3 & 0 & 4 & -4 \\ n_{\Gamma,2} & 1 & 0 & 0 & 0 & 0 & 0 \\ n_{\Upsilon,1} & 1 & 0 & -1 & 0 & 2 & -4 \\ n_{\Upsilon,2} & 1 & 2 & -2 & 0 & 2 & 0 \\ n_{\text{X},1} & 1 & 0 & -1 & 2 & 2 & -4 \\ n_{\text{X},2} & 1 & 2 & -2 & -2 & 2 & 0 \\ n_{\text{Z},1} & 1 & 2 & -3 & -2 & 4 & 0 \\ n_{\text{Z},2} & 1 & 0 & 0 & 2 & 0 & -4 \\ n_{\text{L},1} & 1 & 1 & 0 & 0 & 0 & 0 \\ n_{\text{L},2} & 1 & 1 & -3 & 0 & 4 & -4 \end{pmatrix} \tag{70}$$

$$\begin{pmatrix} \text{SG70} & a_1 & a_2 & a_3 \\ \nu & 4 & 8 & -16 \\ n_{\Gamma,1} & 1 & 4 & -8 \\ n_{\Gamma,2} & 1 & 0 & 0 \\ n_{\Upsilon,1} & 1 & 2 & -4 \\ n_{\Upsilon,2} & 1 & 2 & -4 \\ n_{\text{X},1} & 1 & 2 & -4 \\ n_{\text{X},2} & 1 & 2 & -4 \\ n_{\text{Z},1} & 1 & 2 & -4 \\ n_{\text{Z},2} & 1 & 2 & -4 \\ n_{\text{L},1} & 1 & 1 & 0 \\ n_{\text{L},2} & 1 & 3 & -8 \end{pmatrix} \tag{71}$$

$$\begin{pmatrix}
 \text{SG71} & a_1 & a_2 & a_3 & a_4 & a_5 & a_6 \\
 \nu & 4 & -10 & 2 & 2 & 8 & -24 \\
 n_{\Gamma,1} & 1 & -5 & 1 & 1 & 4 & -12 \\
 n_{\Gamma,2} & 1 & 0 & 0 & 0 & 0 & 0 \\
 n_{X,1} & 1 & -5 & 1 & 1 & 4 & -8 \\
 n_{X,2} & 1 & 0 & 0 & 0 & 0 & -4 \\
 n_{R,1} & 1 & -1 & 1 & 0 & 0 & -4 \\
 n_{R,2} & 1 & -1 & 1 & 0 & 0 & -4 \\
 n_{R,3} & 1 & -4 & 0 & 1 & 4 & -8 \\
 n_{R,4} & 1 & -4 & 0 & 1 & 4 & -8 \\
 n_{S,1} & 1 & -1 & 0 & 0 & 2 & -4 \\
 n_{S,2} & 1 & -1 & 0 & 0 & 2 & -4 \\
 n_{S,3} & 1 & -4 & 1 & 1 & 2 & -8 \\
 n_{S,4} & 1 & -4 & 1 & 1 & 2 & -8 \\
 n_{T,1} & 1 & -1 & 0 & 1 & 0 & -4 \\
 n_{T,2} & 1 & -1 & 0 & 1 & 0 & -4 \\
 n_{T,3} & 1 & -4 & 1 & 0 & 4 & -8 \\
 n_{T,4} & 1 & -4 & 1 & 0 & 4 & -8 \\
 n_{W,1} & 2 & -5 & 1 & 1 & 4 & -12
 \end{pmatrix} \tag{72}$$

$$\begin{pmatrix}
 \text{SG72} & a_1 & a_2 & a_3 & a_4 \\
 \nu & 4 & -4 & 8 & -16 \\
 n_{\Gamma,1} & 1 & -2 & 4 & -8 \\
 n_{\Gamma,2} & 1 & 0 & 0 & 0 \\
 n_{X,1} & 1 & -2 & 4 & -4 \\
 n_{X,2} & 1 & 0 & 0 & -4 \\
 n_{R,1} & 1 & -1 & 2 & -4 \\
 n_{S,1} & 1 & -1 & 2 & -4 \\
 n_{T,1} & 1 & 2 & -2 & 0 \\
 n_{T,2} & 1 & 2 & -2 & 0 \\
 n_{T,3} & 1 & -4 & 6 & -8 \\
 n_{T,4} & 1 & -4 & 6 & -8 \\
 n_{W,1} & 1 & -1 & 2 & -4
 \end{pmatrix} \tag{73}$$

$$\begin{pmatrix}
 \text{SG73} & a_1 & a_2 & a_3 \\
 \nu & 8 & 0 & 0 \\
 n_{\Gamma,1} & 2 & 2 & 0 \\
 n_{\Gamma,2} & 2 & -2 & 0 \\
 n_{X,1} & 2 & 2 & -4 \\
 n_{X,2} & 2 & -2 & 4 \\
 n_{R,1} & 2 & 0 & 0 \\
 n_{S,1} & 2 & 0 & 0 \\
 n_{T,1} & 2 & 0 & 0 \\
 n_{W,1} & 1 & 0 & 0 \\
 n_{W,2} & 1 & 0 & 0 \\
 n_{W,3} & 1 & 0 & 0 \\
 n_{W,4} & 1 & 0 & 0
 \end{pmatrix} \tag{74}$$

$$\begin{pmatrix}
 \text{SG74} & a_1 & a_2 & a_3 & a_4 & a_5 \\
 \nu & 4 & 4 & -12 & 16 & -16 \\
 n_{\Gamma,1} & 1 & 2 & -6 & 8 & -8 \\
 n_{\Gamma,2} & 1 & 0 & 0 & 0 & 0 \\
 n_{X,1} & 1 & 2 & -4 & 4 & -4 \\
 n_{X,2} & 1 & 0 & -2 & 4 & -4 \\
 n_{R,1} & 1 & 1 & -6 & 8 & -8 \\
 n_{R,2} & 1 & 1 & -6 & 8 & -8 \\
 n_{R,3} & 1 & 1 & 0 & 0 & 0 \\
 n_{R,4} & 1 & 1 & 0 & 0 & 0 \\
 n_{S,1} & 1 & 0 & -1 & 2 & -4 \\
 n_{S,2} & 1 & 0 & -1 & 2 & -4 \\
 n_{S,3} & 1 & 2 & -5 & 6 & -4 \\
 n_{S,4} & 1 & 2 & -5 & 6 & -4 \\
 n_{T,1} & 1 & 1 & -3 & 4 & -4 \\
 n_{W,1} & 1 & 1 & -3 & 4 & -4 \\
 n_{W,2} & 1 & 1 & -3 & 4 & -4 \\
 n_{W,3} & 1 & 1 & -3 & 4 & -4 \\
 n_{W,4} & 1 & 1 & -3 & 4 & -4
 \end{pmatrix} \tag{75}$$

$$\begin{pmatrix}
 \text{SG75} & a_1 & a_2 & a_3 \\
 \nu & 4 & 2 & 2 \\
 n_{\Gamma,1} & 1 & 1 & 1 \\
 n_{\Gamma,2} & 1 & 0 & 0 \\
 n_{\Gamma,3} & 1 & 0 & 0 \\
 n_{\Gamma,4} & 1 & 1 & 1 \\
 n_{M,1} & 1 & 0 & 1 \\
 n_{M,2} & 1 & 1 & 0 \\
 n_{M,3} & 1 & 1 & 0 \\
 n_{M,4} & 1 & 0 & 1 \\
 n_{Z,1} & 1 & 1 & 1 \\
 n_{Z,2} & 1 & 0 & 0 \\
 n_{Z,3} & 1 & 0 & 0 \\
 n_{Z,4} & 1 & 1 & 1 \\
 n_{A,1} & 1 & 0 & 1 \\
 n_{A,2} & 1 & 1 & 0 \\
 n_{A,3} & 1 & 1 & 0 \\
 n_{A,4} & 1 & 0 & 1 \\
 n_{R,1} & 2 & 1 & 1 \\
 n_{R,2} & 2 & 1 & 1 \\
 n_{X,1} & 2 & 1 & 1 \\
 n_{X,2} & 2 & 1 & 1
 \end{pmatrix} \tag{76}$$

$$\begin{pmatrix} \text{SG76} & a_1 \\ \nu & 8 \\ n_{\Gamma,1} & 2 \\ n_{\Gamma,2} & 2 \\ n_{\Gamma,3} & 2 \\ n_{\Gamma,4} & 2 \\ n_{\text{M},1} & 2 \\ n_{\text{M},2} & 2 \\ n_{\text{M},3} & 2 \\ n_{\text{M},4} & 2 \\ n_{\text{Z},1} & 1 \\ n_{\text{Z},2} & 2 \\ n_{\text{Z},3} & 1 \\ n_{\text{Z},4} & 2 \\ n_{\text{A},1} & 1 \\ n_{\text{A},2} & 2 \\ n_{\text{A},3} & 1 \\ n_{\text{A},4} & 2 \\ n_{\text{R},1} & 2 \\ n_{\text{R},2} & 2 \\ n_{\text{X},1} & 4 \\ n_{\text{X},2} & 4 \end{pmatrix} \tag{77}$$

$$\begin{pmatrix} \text{SG77} & a_1 \\ \nu & 4 \\ n_{\Gamma,1} & 1 \\ n_{\Gamma,2} & 1 \\ n_{\Gamma,3} & 1 \\ n_{\Gamma,4} & 1 \\ n_{\text{M},1} & 1 \\ n_{\text{M},2} & 1 \\ n_{\text{M},3} & 1 \\ n_{\text{M},4} & 1 \\ n_{\text{Z},1} & 1 \\ n_{\text{Z},2} & 1 \\ n_{\text{Z},3} & 1 \\ n_{\text{Z},4} & 1 \\ n_{\text{A},1} & 1 \\ n_{\text{A},2} & 1 \\ n_{\text{A},3} & 1 \\ n_{\text{A},4} & 1 \\ n_{\text{R},1} & 2 \\ n_{\text{R},2} & 2 \\ n_{\text{X},1} & 2 \\ n_{\text{X},2} & 2 \end{pmatrix} \tag{78}$$

$$\begin{pmatrix} \text{SG78} & a_1 \\ \nu & 8 \\ n_{\Gamma,1} & 2 \\ n_{\Gamma,2} & 2 \\ n_{\Gamma,3} & 2 \\ n_{\Gamma,4} & 2 \\ n_{M,1} & 2 \\ n_{M,2} & 2 \\ n_{M,3} & 2 \\ n_{M,4} & 2 \\ n_{Z,1} & 1 \\ n_{Z,2} & 2 \\ n_{Z,3} & 1 \\ n_{Z,4} & 2 \\ n_{A,1} & 1 \\ n_{A,2} & 2 \\ n_{A,3} & 1 \\ n_{A,4} & 2 \\ n_{R,1} & 2 \\ n_{R,2} & 2 \\ n_{X,1} & 4 \\ n_{X,2} & 4 \end{pmatrix} \tag{79}$$

$$\begin{pmatrix} \text{SG79} & a_1 & a_2 \\ \nu & 4 & 2 \\ n_{\Gamma,1} & 1 & 1 \\ n_{\Gamma,2} & 1 & 0 \\ n_{\Gamma,3} & 1 & 0 \\ n_{\Gamma,4} & 1 & 1 \\ n_{N,1} & 2 & 1 \\ n_{X,1} & 2 & 1 \\ n_{X,2} & 2 & 1 \\ n_{Z,1} & 1 & 1 \\ n_{Z,2} & 1 & 0 \\ n_{Z,3} & 1 & 0 \\ n_{Z,4} & 1 & 1 \\ n_{P,1} & 2 & 1 \\ n_{P,2} & 2 & 1 \end{pmatrix} \tag{80}$$

$$\begin{pmatrix} \text{SG80} & a_1 \\ \nu & 4 \\ n_{\Gamma,1} & 1 \\ n_{\Gamma,2} & 1 \\ n_{\Gamma,3} & 1 \\ n_{\Gamma,4} & 1 \\ n_{N,1} & 2 \\ n_{X,1} & 2 \\ n_{X,2} & 2 \\ n_{Z,1} & 1 \\ n_{Z,2} & 1 \\ n_{Z,3} & 1 \\ n_{Z,4} & 1 \\ n_{P,1} & 2 \\ n_{P,2} & 1 \end{pmatrix} \tag{81}$$

$$\begin{pmatrix}
 \text{SG81} & a_1 & a_2 & a_3 & a_4 & a_5 \\
 \nu & 4 & 2 & 2 & 2 & -4 \\
 n_{\Gamma,1} & 1 & 0 & 0 & 0 & 0 \\
 n_{\Gamma,2} & 1 & 1 & 1 & 1 & -2 \\
 n_{\Gamma,3} & 1 & 1 & 1 & 1 & -2 \\
 n_{\Gamma,4} & 1 & 0 & 0 & 0 & 0 \\
 n_{\text{M},1} & 1 & 1 & 1 & 0 & -2 \\
 n_{\text{M},2} & 1 & 0 & 0 & 1 & 0 \\
 n_{\text{M},3} & 1 & 0 & 0 & 1 & 0 \\
 n_{\text{M},4} & 1 & 1 & 1 & 0 & -2 \\
 n_{\text{Z},1} & 1 & 1 & 0 & 1 & -2 \\
 n_{\text{Z},2} & 1 & 0 & 1 & 0 & 0 \\
 n_{\text{Z},3} & 1 & 0 & 1 & 0 & 0 \\
 n_{\text{Z},4} & 1 & 1 & 0 & 1 & -2 \\
 n_{\text{A},1} & 1 & 0 & 1 & 1 & -2 \\
 n_{\text{A},2} & 1 & 1 & 0 & 0 & 0 \\
 n_{\text{A},3} & 1 & 1 & 0 & 0 & 0 \\
 n_{\text{A},4} & 1 & 0 & 1 & 1 & -2 \\
 n_{\text{R},1} & 2 & 1 & 1 & 1 & -2 \\
 n_{\text{R},2} & 2 & 1 & 1 & 1 & -2 \\
 n_{\text{X},1} & 2 & 1 & 1 & 1 & -2 \\
 n_{\text{X},2} & 2 & 1 & 1 & 1 & -2
 \end{pmatrix} \tag{82}$$

$$\begin{pmatrix}
 \text{SG82} & a_1 & a_2 & a_3 & a_4 & a_5 \\
 \nu & 4 & 2 & 2 & 2 & -4 \\
 n_{\Gamma,1} & 1 & 0 & 0 & 0 & 0 \\
 n_{\Gamma,2} & 1 & 1 & 1 & 1 & -2 \\
 n_{\Gamma,3} & 1 & 1 & 1 & 1 & -2 \\
 n_{\Gamma,4} & 1 & 0 & 0 & 0 & 0 \\
 n_{\text{N},1} & 2 & 1 & 1 & 1 & -2 \\
 n_{\text{X},1} & 2 & 1 & 1 & 1 & -2 \\
 n_{\text{X},2} & 2 & 1 & 1 & 1 & -2 \\
 n_{\text{Z},1} & 1 & 1 & 1 & 0 & -2 \\
 n_{\text{Z},2} & 1 & 0 & 0 & 1 & 0 \\
 n_{\text{Z},3} & 1 & 0 & 0 & 1 & 0 \\
 n_{\text{Z},4} & 1 & 1 & 1 & 0 & -2 \\
 n_{\text{P},1} & 1 & 0 & 1 & 1 & -2 \\
 n_{\text{P},2} & 1 & 0 & 1 & 0 & 0 \\
 n_{\text{P},3} & 1 & 1 & 0 & 0 & 0 \\
 n_{\text{P},4} & 1 & 1 & 0 & 1 & -2
 \end{pmatrix} \tag{83}$$





$$\left( \begin{array}{r} \text{SG84} \\ \nu \\ n_{\Gamma,1} \\ n_{\Gamma,2} \\ n_{\Gamma,3} \\ n_{\Gamma,4} \\ n_{\Gamma,5} \\ n_{\Gamma,6} \\ n_{\Gamma,7} \\ n_{\Gamma,8} \\ n_{M,1} \\ n_{M,2} \\ n_{M,3} \\ n_{M,4} \\ n_{M,5} \\ n_{M,6} \\ n_{M,7} \\ n_{M,8} \\ n_{Z,1} \\ n_{Z,2} \\ n_{A,1} \\ n_{A,2} \\ n_{R,1} \\ n_{R,2} \\ n_{R,3} \\ n_{R,4} \\ n_{X,1} \\ n_{X,2} \\ n_{X,3} \\ n_{X,4} \end{array} \begin{array}{ccccccc} a_1 & a_2 & a_3 & a_4 & a_5 & a_6 & a_7 \\ 8 & 4 & 4 & 4 & -28 & 32 & -32 \\ 1 & 1 & 1 & 1 & -7 & 8 & -8 \\ 1 & 0 & 0 & 1 & -3 & 4 & -4 \\ 1 & 0 & 0 & 1 & -3 & 4 & -4 \\ 1 & 1 & 1 & 1 & -7 & 8 & -8 \\ 1 & 0 & 0 & 0 & 0 & 0 & 0 \\ 1 & 1 & 1 & 0 & -4 & 4 & -4 \\ 1 & 1 & 1 & 0 & -4 & 4 & -4 \\ 1 & 0 & 0 & 0 & 0 & 0 & 0 \\ 1 & 0 & 1 & 0 & -3 & 4 & -4 \\ 1 & 1 & 0 & 0 & -3 & 4 & -4 \\ 1 & 1 & 0 & 0 & -3 & 4 & -4 \\ 1 & 0 & 1 & 0 & -3 & 4 & -4 \\ 1 & 1 & 0 & 1 & -4 & 4 & -4 \\ 1 & 0 & 1 & 1 & -4 & 4 & -4 \\ 1 & 0 & 1 & 1 & -4 & 4 & -4 \\ 1 & 1 & 0 & 1 & -4 & 4 & -4 \\ 2 & 1 & 1 & 1 & -7 & 8 & -8 \\ 2 & 1 & 1 & 1 & -7 & 8 & -8 \\ 2 & 1 & 1 & 1 & -7 & 8 & -8 \\ 2 & 1 & 1 & 1 & -7 & 8 & -8 \\ 2 & 1 & 1 & 2 & -9 & 10 & -8 \\ 2 & 1 & 1 & 2 & -9 & 10 & -8 \\ 2 & 1 & 1 & 0 & -5 & 6 & -8 \\ 2 & 1 & 1 & 0 & -5 & 6 & -8 \\ 2 & 1 & 1 & 1 & -4 & 4 & -4 \\ 2 & 1 & 1 & 1 & -4 & 4 & -4 \\ 2 & 1 & 1 & 1 & -10 & 12 & -12 \\ 2 & 1 & 1 & 1 & -10 & 12 & -12 \end{array} \right)$$

(85)

$$\left( \begin{array}{r} \text{SG85} \\ \nu \\ n_{\Gamma,1} \\ n_{\Gamma,2} \\ n_{\Gamma,3} \\ n_{\Gamma,4} \\ n_{\Gamma,5} \\ n_{\Gamma,6} \\ n_{\Gamma,7} \\ n_{\Gamma,8} \\ n_{M,1} \\ n_{M,2} \\ n_{Z,1} \\ n_{Z,2} \\ n_{Z,3} \\ n_{Z,4} \\ n_{Z,5} \\ n_{Z,6} \\ n_{Z,7} \\ n_{Z,8} \\ n_{A,1} \\ n_{A,2} \\ n_{R,1} \\ n_{X,1} \end{array} \begin{array}{cccccc} a_1 & a_2 & a_3 & a_4 & a_5 & a_6 \\ 8 & 0 & 0 & 4 & 0 & -16 \\ 1 & 0 & 0 & 1 & 0 & -4 \\ 1 & 0 & -2 & 0 & 2 & -4 \\ 1 & 0 & -2 & 0 & 2 & -4 \\ 1 & 0 & 0 & 1 & 0 & -4 \\ 1 & 0 & 1 & 1 & -2 & 0 \\ 1 & 0 & 1 & 0 & 0 & 0 \\ 1 & 0 & 1 & 0 & 0 & 0 \\ 1 & 0 & 1 & 1 & -2 & 0 \\ 2 & 0 & 0 & 1 & 0 & -4 \\ 2 & 0 & 0 & 1 & 0 & -4 \\ 1 & 1 & 3 & 1 & -4 & 0 \\ 1 & -1 & -1 & 0 & 2 & -4 \\ 1 & -1 & -1 & 0 & 2 & -4 \\ 1 & 1 & 3 & 1 & -4 & 0 \\ 1 & -1 & -2 & 1 & 2 & -4 \\ 1 & 1 & 0 & 0 & 0 & 0 \\ 1 & 1 & 0 & 0 & 0 & 0 \\ 1 & -1 & -2 & 1 & 2 & -4 \\ 2 & 0 & 0 & 1 & 0 & -4 \\ 2 & 0 & 0 & 1 & 0 & -4 \\ 2 & 0 & 0 & 1 & 0 & -4 \\ 2 & 0 & 0 & 1 & 0 & -4 \end{array} \right)$$

(86)

$$\begin{pmatrix}
 \text{SG86} & a_1 & a_2 & a_3 & a_4 & a_5 \\
 \nu & 8 & 0 & -4 & 8 & -16 \\
 n_{\Gamma,1} & 1 & 0 & -1 & 2 & -4 \\
 n_{\Gamma,2} & 1 & 0 & -2 & 2 & -4 \\
 n_{\Gamma,3} & 1 & 0 & -2 & 2 & -4 \\
 n_{\Gamma,4} & 1 & 0 & -1 & 2 & -4 \\
 n_{\Gamma,5} & 1 & 0 & 0 & 0 & 0 \\
 n_{\Gamma,6} & 1 & 0 & 1 & 0 & 0 \\
 n_{\Gamma,7} & 1 & 0 & 1 & 0 & 0 \\
 n_{\Gamma,8} & 1 & 0 & 0 & 0 & 0 \\
 n_{M,1} & 2 & 0 & -1 & 2 & -4 \\
 n_{M,2} & 2 & 0 & -1 & 2 & -4 \\
 n_{Z,1} & 2 & 0 & -1 & 2 & -4 \\
 n_{Z,2} & 2 & 0 & -1 & 2 & -4 \\
 n_{A,1} & 1 & 1 & 2 & -2 & 0 \\
 n_{A,2} & 1 & -1 & -1 & 2 & -4 \\
 n_{A,3} & 1 & -1 & -1 & 2 & -4 \\
 n_{A,4} & 1 & 1 & 2 & -2 & 0 \\
 n_{A,5} & 1 & -1 & -3 & 4 & -4 \\
 n_{A,6} & 1 & 1 & 0 & 0 & 0 \\
 n_{A,7} & 1 & 1 & 0 & 0 & 0 \\
 n_{A,8} & 1 & -1 & -3 & 4 & -4 \\
 n_{R,1} & 2 & 0 & -1 & 2 & -4 \\
 n_{X,1} & 2 & 0 & -1 & 2 & -4
 \end{pmatrix} \tag{87}$$

$$\begin{pmatrix}
 \text{SG87} & a_1 & a_2 & a_3 & a_4 & a_5 & a_6 & a_7 & a_8 & a_9 \\
 \nu & 8 & -86 & 4 & 4 & 4 & 2 & 2 & 72 & -112 \\
 n_{\Gamma,1} & 1 & -17 & 1 & 1 & 1 & 1 & 0 & 14 & -24 \\
 n_{\Gamma,2} & 1 & -12 & 0 & 0 & 1 & 0 & 1 & 10 & -16 \\
 n_{\Gamma,3} & 1 & -12 & 0 & 0 & 1 & 0 & 1 & 10 & -16 \\
 n_{\Gamma,4} & 1 & -17 & 1 & 1 & 1 & 1 & 0 & 14 & -24 \\
 n_{\Gamma,5} & 1 & -7 & 1 & 0 & 0 & 0 & 0 & 6 & -8 \\
 n_{\Gamma,6} & 1 & -7 & 0 & 1 & 0 & 0 & 0 & 6 & -8 \\
 n_{\Gamma,7} & 1 & -7 & 0 & 1 & 0 & 0 & 0 & 6 & -8 \\
 n_{\Gamma,8} & 1 & -7 & 1 & 0 & 0 & 0 & 0 & 6 & -8 \\
 n_{N,1} & 2 & -18 & 1 & 1 & 1 & 0 & 0 & 16 & -24 \\
 n_{N,2} & 2 & -25 & 1 & 1 & 1 & 1 & 1 & 20 & -32 \\
 n_{X,1} & 2 & -25 & 1 & 1 & 0 & 1 & 1 & 22 & -32 \\
 n_{X,2} & 2 & -25 & 1 & 1 & 0 & 1 & 1 & 22 & -32 \\
 n_{X,3} & 2 & -18 & 1 & 1 & 2 & 0 & 0 & 14 & -24 \\
 n_{X,4} & 2 & -18 & 1 & 1 & 2 & 0 & 0 & 14 & -24 \\
 n_{Z,1} & 1 & -12 & 1 & 0 & 1 & 1 & 0 & 10 & -16 \\
 n_{Z,2} & 1 & -13 & 0 & 1 & 1 & 0 & 1 & 10 & -16 \\
 n_{Z,3} & 1 & -13 & 0 & 1 & 1 & 0 & 1 & 10 & -16 \\
 n_{Z,4} & 1 & -12 & 1 & 0 & 1 & 1 & 0 & 10 & -16 \\
 n_{Z,5} & 1 & -12 & 1 & 1 & 0 & 0 & 0 & 10 & -16 \\
 n_{Z,6} & 1 & -6 & 0 & 0 & 0 & 0 & 0 & 6 & -8 \\
 n_{Z,7} & 1 & -6 & 0 & 0 & 0 & 0 & 0 & 6 & -8 \\
 n_{Z,8} & 1 & -12 & 1 & 1 & 0 & 0 & 0 & 10 & -16 \\
 n_{P,1} & 2 & -18 & 1 & 1 & 1 & 1 & 0 & 14 & -24 \\
 n_{P,2} & 2 & -25 & 1 & 1 & 1 & 0 & 1 & 22 & -32 \\
 n_{P,3} & 2 & -25 & 1 & 1 & 1 & 0 & 1 & 22 & -32 \\
 n_{P,4} & 2 & -18 & 1 & 1 & 1 & 1 & 0 & 14 & -24
 \end{pmatrix} \tag{88}$$

$$\begin{pmatrix} \text{SG88} & a_1 & a_2 & a_3 & a_4 & a_5 \\ \nu & 8 & 8 & -8 & 4 & -16 \\ n_{\Gamma,1} & 1 & 2 & -2 & 1 & -4 \\ n_{\Gamma,2} & 1 & 2 & -2 & 0 & -4 \\ n_{\Gamma,3} & 1 & 2 & -2 & 0 & -4 \\ n_{\Gamma,4} & 1 & 2 & -2 & 1 & -4 \\ n_{\Gamma,5} & 1 & 0 & 0 & 0 & 0 \\ n_{\Gamma,6} & 1 & 0 & 0 & 1 & 0 \\ n_{\Gamma,7} & 1 & 0 & 0 & 1 & 0 \\ n_{\Gamma,8} & 1 & 0 & 0 & 0 & 0 \\ n_{\text{N},1} & 2 & 1 & -1 & 1 & -4 \\ n_{\text{N},2} & 2 & 3 & -3 & 1 & -4 \\ n_{\text{X},1} & 2 & 2 & -2 & 1 & -4 \\ n_{\text{Z},1} & 2 & 2 & -2 & 1 & -4 \\ n_{\text{Z},2} & 2 & 2 & -2 & 1 & -4 \\ n_{\text{P},1} & 2 & 2 & -2 & 1 & -4 \\ n_{\text{P},2} & 1 & 1 & 0 & 0 & 0 \\ n_{\text{P},3} & 2 & 2 & -2 & 1 & -4 \\ n_{\text{P},4} & 1 & 1 & -2 & 1 & -4 \end{pmatrix} \tag{89}$$

$$\begin{pmatrix} \text{SG89} & a_1 & a_2 & a_3 \\ \nu & 4 & 2 & 2 \\ n_{\Gamma,1} & 1 & 1 & 1 \\ n_{\Gamma,2} & 1 & 0 & 0 \\ n_{\text{M},1} & 1 & 0 & 1 \\ n_{\text{M},2} & 1 & 1 & 0 \\ n_{\text{Z},1} & 1 & 1 & 1 \\ n_{\text{Z},2} & 1 & 0 & 0 \\ n_{\text{A},1} & 1 & 0 & 1 \\ n_{\text{A},2} & 1 & 1 & 0 \\ n_{\text{R},1} & 2 & 1 & 1 \\ n_{\text{X},1} & 2 & 1 & 1 \end{pmatrix} \tag{90}$$

$$\begin{pmatrix} \text{SG90} & a_1 & a_2 \\ \nu & 4 & 4 \\ n_{\Gamma,1} & 1 & 2 \\ n_{\Gamma,2} & 1 & 0 \\ n_{\text{M},1} & 1 & 1 \\ n_{\text{M},2} & 1 & 1 \\ n_{\text{Z},1} & 1 & 2 \\ n_{\text{Z},2} & 1 & 0 \\ n_{\text{A},1} & 1 & 1 \\ n_{\text{A},2} & 1 & 1 \\ n_{\text{R},1} & 1 & 1 \\ n_{\text{R},2} & 1 & 1 \\ n_{\text{R},3} & 1 & 1 \\ n_{\text{R},4} & 1 & 1 \\ n_{\text{X},1} & 1 & 1 \\ n_{\text{X},2} & 1 & 1 \\ n_{\text{X},3} & 1 & 1 \\ n_{\text{X},4} & 1 & 1 \end{pmatrix} \tag{91}$$

$$\begin{pmatrix} \text{SG91} & a_1 \\ \nu & 8 \\ n_{\Gamma,1} & 2 \\ n_{\Gamma,2} & 2 \\ n_{\text{M},1} & 2 \\ n_{\text{M},2} & 2 \\ n_{\text{Z},1} & 1 \\ n_{\text{Z},2} & 1 \\ n_{\text{Z},3} & 1 \\ n_{\text{Z},4} & 1 \\ n_{\text{Z},5} & 2 \\ n_{\text{A},1} & 1 \\ n_{\text{A},2} & 1 \\ n_{\text{A},3} & 1 \\ n_{\text{A},4} & 1 \\ n_{\text{A},5} & 2 \\ n_{\text{R},1} & 2 \\ n_{\text{R},2} & 2 \\ n_{\text{R},3} & 2 \\ n_{\text{R},4} & 2 \\ n_{\text{X},1} & 4 \end{pmatrix} \tag{92}$$

$$\begin{pmatrix} \text{SG92} & a_1 \\ \nu & 8 \\ n_{\Gamma,1} & 2 \\ n_{\Gamma,2} & 2 \\ n_{\text{M},1} & 2 \\ n_{\text{M},2} & 2 \\ n_{\text{Z},1} & 1 \\ n_{\text{Z},2} & 1 \\ n_{\text{Z},3} & 1 \\ n_{\text{Z},4} & 1 \\ n_{\text{Z},5} & 2 \\ n_{\text{A},1} & 1 \\ n_{\text{A},2} & 1 \\ n_{\text{A},3} & 1 \\ n_{\text{A},4} & 1 \\ n_{\text{A},5} & 1 \\ n_{\text{R},1} & 2 \\ n_{\text{X},1} & 2 \\ n_{\text{X},2} & 2 \\ n_{\text{X},3} & 2 \\ n_{\text{X},4} & 2 \end{pmatrix} \tag{93}$$

$$\left( \begin{array}{cc} \text{SG93} & a_1 \\ \nu & 4 \\ n_{\Gamma,1} & 1 \\ n_{\Gamma,2} & 1 \\ n_{M,1} & 1 \\ n_{M,2} & 1 \\ n_{Z,1} & 1 \\ n_{Z,2} & 1 \\ n_{A,1} & 1 \\ n_{A,2} & 1 \\ n_{R,1} & 2 \\ n_{X,1} & 2 \end{array} \right) \quad (94)$$

$$\left( \begin{array}{cc} \text{SG94} & a_1 \\ \nu & 4 \\ n_{\Gamma,1} & 1 \\ n_{\Gamma,2} & 1 \\ n_{M,1} & 1 \\ n_{M,2} & 1 \\ n_{Z,1} & 1 \\ n_{Z,2} & 1 \\ n_{A,1} & 1 \\ n_{A,2} & 1 \\ n_{R,1} & 1 \\ n_{R,2} & 1 \\ n_{R,3} & 1 \\ n_{R,4} & 1 \\ n_{X,1} & 1 \\ n_{X,2} & 1 \\ n_{X,3} & 1 \\ n_{X,4} & 1 \end{array} \right) \quad (95)$$

$$\left( \begin{array}{cc} \text{SG95} & a_1 \\ \nu & 8 \\ n_{\Gamma,1} & 2 \\ n_{\Gamma,2} & 2 \\ n_{M,1} & 2 \\ n_{M,2} & 2 \\ n_{Z,1} & 1 \\ n_{Z,2} & 1 \\ n_{Z,3} & 1 \\ n_{Z,4} & 1 \\ n_{Z,5} & 2 \\ n_{A,1} & 1 \\ n_{A,2} & 1 \\ n_{A,3} & 1 \\ n_{A,4} & 1 \\ n_{A,5} & 2 \\ n_{R,1} & 2 \\ n_{R,2} & 2 \\ n_{R,3} & 2 \\ n_{R,4} & 2 \\ n_{X,1} & 4 \end{array} \right) \quad (96)$$

$$\begin{pmatrix} \text{SG96} & a_1 \\ \nu & 8 \\ n_{\Gamma,1} & 2 \\ n_{\Gamma,2} & 2 \\ n_{M,1} & 2 \\ n_{M,2} & 2 \\ n_{Z,1} & 1 \\ n_{Z,2} & 1 \\ n_{Z,3} & 1 \\ n_{Z,4} & 1 \\ n_{Z,5} & 2 \\ n_{A,1} & 1 \\ n_{A,2} & 1 \\ n_{A,3} & 1 \\ n_{A,4} & 1 \\ n_{A,5} & 1 \\ n_{R,1} & 2 \\ n_{X,1} & 2 \\ n_{X,2} & 2 \\ n_{X,3} & 2 \\ n_{X,4} & 2 \end{pmatrix} \tag{97}$$

$$\begin{pmatrix} \text{SG97} & a_1 & a_2 \\ \nu & 4 & 2 \\ n_{\Gamma,1} & 1 & 1 \\ n_{\Gamma,2} & 1 & 0 \\ n_{N,1} & 2 & 1 \\ n_{N,2} & 2 & 1 \\ n_{X,1} & 2 & 1 \\ n_{Z,1} & 1 & 1 \\ n_{Z,2} & 1 & 0 \\ n_{P,1} & 2 & 1 \end{pmatrix} \tag{98}$$

$$\begin{pmatrix} \text{SG98} & a_1 \\ \nu & 4 \\ n_{\Gamma,1} & 1 \\ n_{\Gamma,2} & 1 \\ n_{N,1} & 2 \\ n_{N,2} & 2 \\ n_{X,1} & 2 \\ n_{Z,1} & 1 \\ n_{Z,2} & 1 \\ n_{P,1} & 1 \\ n_{P,2} & 1 \\ n_{P,3} & 1 \\ n_{P,4} & 1 \end{pmatrix} \tag{99}$$

$$\begin{pmatrix} \text{SG99} & a_1 & a_2 & a_3 \\ \nu & 4 & 2 & 2 \\ n_{\Gamma,1} & 1 & 1 & 1 \\ n_{\Gamma,2} & 1 & 0 & 0 \\ n_{\text{M},1} & 1 & 0 & 1 \\ n_{\text{M},2} & 1 & 1 & 0 \\ n_{\text{Z},1} & 1 & 1 & 1 \\ n_{\text{Z},2} & 1 & 0 & 0 \\ n_{\text{A},1} & 1 & 0 & 1 \\ n_{\text{A},2} & 1 & 1 & 0 \\ n_{\text{R},1} & 2 & 1 & 1 \\ n_{\text{X},1} & 2 & 1 & 1 \end{pmatrix} \tag{100}$$

$$\begin{pmatrix} \text{SG100} & a_1 & a_2 \\ \nu & 4 & 4 \\ n_{\Gamma,1} & 1 & 2 \\ n_{\Gamma,2} & 1 & 0 \\ n_{\text{M},1} & 1 & 1 \\ n_{\text{M},2} & 1 & 1 \\ n_{\text{Z},1} & 1 & 2 \\ n_{\text{Z},2} & 1 & 0 \\ n_{\text{A},1} & 1 & 1 \\ n_{\text{A},2} & 1 & 1 \\ n_{\text{R},1} & 1 & 1 \\ n_{\text{R},2} & 1 & 1 \\ n_{\text{R},3} & 1 & 1 \\ n_{\text{R},4} & 1 & 1 \\ n_{\text{X},1} & 1 & 1 \\ n_{\text{X},2} & 1 & 1 \\ n_{\text{X},3} & 1 & 1 \\ n_{\text{X},4} & 1 & 1 \end{pmatrix} \tag{101}$$

$$\begin{pmatrix} \text{SG101} & a_1 \\ \nu & 4 \\ n_{\Gamma,1} & 1 \\ n_{\Gamma,2} & 1 \\ n_{\text{M},1} & 1 \\ n_{\text{M},2} & 1 \\ n_{\text{Z},1} & 1 \\ n_{\text{Z},2} & 1 \\ n_{\text{A},1} & 1 \\ n_{\text{A},2} & 1 \\ n_{\text{R},1} & 1 \\ n_{\text{X},1} & 2 \end{pmatrix} \tag{102}$$

$$\begin{pmatrix} \text{SG102} & a_1 \\ \nu & 4 \\ n_{\Gamma,1} & 1 \\ n_{\Gamma,2} & 1 \\ n_{\text{M},1} & 1 \\ n_{\text{M},2} & 1 \\ n_{\text{Z},1} & 1 \\ n_{\text{Z},2} & 1 \\ n_{\text{A},1} & 1 \\ n_{\text{A},2} & 1 \\ n_{\text{R},1} & 1 \\ n_{\text{R},2} & 1 \\ n_{\text{R},3} & 1 \\ n_{\text{R},4} & 1 \\ n_{\text{X},1} & 1 \\ n_{\text{X},2} & 1 \\ n_{\text{X},3} & 1 \\ n_{\text{X},4} & 1 \end{pmatrix} \quad (103)$$

$$\begin{pmatrix} \text{SG103} & a_1 & a_2 & a_3 \\ \nu & 8 & 4 & 4 \\ n_{\Gamma,1} & 2 & 2 & 2 \\ n_{\Gamma,2} & 2 & 0 & 0 \\ n_{\text{M},1} & 2 & 0 & 2 \\ n_{\text{M},2} & 2 & 2 & 0 \\ n_{\text{Z},1} & 1 & 1 & 1 \\ n_{\text{Z},2} & 1 & 0 & 0 \\ n_{\text{A},1} & 1 & 0 & 1 \\ n_{\text{A},2} & 1 & 1 & 0 \\ n_{\text{R},1} & 2 & 1 & 1 \\ n_{\text{X},1} & 4 & 2 & 2 \end{pmatrix} \quad (104)$$

$$\begin{pmatrix} \text{SG104} & a_1 & a_2 \\ \nu & 8 & 4 \\ n_{\Gamma,1} & 2 & 2 \\ n_{\Gamma,2} & 2 & 0 \\ n_{\text{M},1} & 2 & 1 \\ n_{\text{M},2} & 2 & 1 \\ n_{\text{Z},1} & 1 & 1 \\ n_{\text{Z},2} & 1 & 0 \\ n_{\text{A},1} & 2 & 1 \\ n_{\text{A},2} & 2 & 1 \\ n_{\text{R},1} & 2 & 1 \\ n_{\text{R},2} & 2 & 1 \\ n_{\text{R},3} & 2 & 1 \\ n_{\text{R},4} & 2 & 1 \\ n_{\text{X},1} & 2 & 1 \\ n_{\text{X},2} & 2 & 1 \\ n_{\text{X},3} & 2 & 1 \\ n_{\text{X},4} & 2 & 1 \end{pmatrix} \quad (105)$$



$$\left( \begin{array}{cc} \text{SG105} & a_1 \\ \nu & 4 \\ n_{\Gamma,1} & 1 \\ n_{\Gamma,2} & 1 \\ n_{M,1} & 1 \\ n_{M,2} & 1 \\ n_{Z,1} & 1 \\ n_{Z,2} & 1 \\ n_{A,1} & 1 \\ n_{A,2} & 1 \\ n_{R,1} & 2 \\ n_{X,1} & 2 \end{array} \right) \quad (106)$$

$$\left( \begin{array}{cc} \text{SG106} & a_1 \\ \nu & 8 \\ n_{\Gamma,1} & 2 \\ n_{\Gamma,2} & 2 \\ n_{M,1} & 2 \\ n_{M,2} & 2 \\ n_{Z,1} & 2 \\ n_{Z,2} & 2 \\ n_{A,1} & 1 \\ n_{A,2} & 1 \\ n_{R,1} & 2 \\ n_{R,2} & 2 \\ n_{R,3} & 2 \\ n_{R,4} & 2 \\ n_{X,1} & 2 \\ n_{X,2} & 2 \\ n_{X,3} & 2 \\ n_{X,4} & 2 \end{array} \right) \quad (107)$$

$$\left( \begin{array}{ccc} \text{SG107} & a_1 & a_2 \\ \nu & 4 & 2 \\ n_{\Gamma,1} & 1 & 1 \\ n_{\Gamma,2} & 1 & 0 \\ n_{N,1} & 2 & 1 \\ n_{N,2} & 2 & 1 \\ n_{X,1} & 2 & 1 \\ n_{Z,1} & 1 & 1 \\ n_{Z,2} & 1 & 0 \\ n_{P,1} & 2 & 1 \end{array} \right) \quad (108)$$

$$\left( \begin{array}{ccc} \text{SG108} & a_1 & a_2 \\ \nu & 4 & 4 \\ n_{\Gamma,1} & 1 & 2 \\ n_{\Gamma,2} & 1 & 0 \\ n_{N,1} & 1 & 1 \\ n_{N,2} & 1 & 1 \\ n_{X,1} & 2 & 2 \\ n_{Z,1} & 1 & 2 \\ n_{Z,2} & 1 & 0 \\ n_{P,1} & 1 & 1 \end{array} \right) \quad (109)$$

$$\begin{pmatrix} \text{SG109} & a_1 \\ \nu & 4 \\ n_{\Gamma,1} & 1 \\ n_{\Gamma,2} & 1 \\ n_{\text{N},1} & 2 \\ n_{\text{N},2} & 2 \\ n_{\text{X},1} & 1 \\ n_{\text{X},2} & 1 \\ n_{\text{X},3} & 1 \\ n_{\text{X},4} & 1 \\ n_{\text{Z},1} & 1 \\ n_{\text{Z},2} & 1 \\ n_{\text{P},1} & 1 \\ n_{\text{P},2} & 1 \\ n_{\text{P},3} & 1 \\ n_{\text{P},4} & 1 \end{pmatrix} \tag{110}$$

$$\begin{pmatrix} \text{SG110} & a_1 \\ \nu & 8 \\ n_{\Gamma,1} & 2 \\ n_{\Gamma,2} & 2 \\ n_{\text{N},1} & 2 \\ n_{\text{N},2} & 2 \\ n_{\text{X},1} & 2 \\ n_{\text{X},2} & 2 \\ n_{\text{X},3} & 2 \\ n_{\text{X},4} & 2 \\ n_{\text{Z},1} & 2 \\ n_{\text{Z},2} & 2 \\ n_{\text{P},1} & 2 \\ n_{\text{P},2} & 2 \\ n_{\text{P},3} & 1 \\ n_{\text{P},4} & 1 \end{pmatrix} \tag{111}$$

$$\begin{pmatrix} \text{SG111} & a_1 & a_2 & a_3 & a_4 & a_5 \\ \nu & 4 & 2 & 2 & 2 & -4 \\ n_{\Gamma,1} & 1 & 0 & 0 & 0 & 0 \\ n_{\Gamma,2} & 1 & 1 & 1 & 1 & -2 \\ n_{\text{M},1} & 1 & 1 & 0 & 1 & -2 \\ n_{\text{M},2} & 1 & 0 & 1 & 0 & 0 \\ n_{\text{Z},1} & 1 & 0 & 1 & 1 & -2 \\ n_{\text{Z},2} & 1 & 1 & 0 & 0 & 0 \\ n_{\text{A},1} & 1 & 1 & 1 & 0 & -2 \\ n_{\text{A},2} & 1 & 0 & 0 & 1 & 0 \\ n_{\text{R},1} & 2 & 1 & 1 & 1 & -2 \\ n_{\text{X},1} & 2 & 1 & 1 & 1 & -2 \end{pmatrix} \tag{112}$$

$$\begin{pmatrix}
 \text{SG112} & a_1 & a_2 & a_3 \\
 \nu & 4 & 4 & 0 \\
 n_{\Gamma,1} & 1 & 0 & 0 \\
 n_{\Gamma,2} & 1 & 2 & 0 \\
 n_{M,1} & 1 & 2 & -2 \\
 n_{M,2} & 1 & 0 & 2 \\
 n_{Z,1} & 1 & 1 & 0 \\
 n_{Z,2} & 1 & 1 & 0 \\
 n_{A,1} & 1 & 1 & 0 \\
 n_{A,2} & 1 & 1 & 0 \\
 n_{R,1} & 2 & 2 & 0 \\
 n_{X,1} & 2 & 2 & 0
 \end{pmatrix} \tag{113}$$

$$\begin{pmatrix}
 \text{SG113} & a_1 & a_2 & a_3 \\
 \nu & 4 & 4 & 0 \\
 n_{\Gamma,1} & 1 & 0 & 0 \\
 n_{\Gamma,2} & 1 & 2 & 0 \\
 n_{M,1} & 1 & 1 & 0 \\
 n_{M,2} & 1 & 1 & 0 \\
 n_{Z,1} & 1 & 2 & -2 \\
 n_{Z,2} & 1 & 0 & 2 \\
 n_{A,1} & 1 & 1 & 0 \\
 n_{A,2} & 1 & 1 & 0 \\
 n_{R,1} & 1 & 1 & 0 \\
 n_{R,2} & 1 & 1 & 0 \\
 n_{R,3} & 1 & 1 & 0 \\
 n_{R,4} & 1 & 1 & 0 \\
 n_{X,1} & 1 & 1 & 0 \\
 n_{X,2} & 1 & 1 & 0 \\
 n_{X,3} & 1 & 1 & 0 \\
 n_{X,4} & 1 & 1 & 0
 \end{pmatrix} \tag{114}$$

$$\begin{pmatrix}
 \text{SG114} & a_1 & a_2 & a_3 \\
 \nu & 8 & 4 & -8 \\
 n_{\Gamma,1} & 2 & 0 & -2 \\
 n_{\Gamma,2} & 2 & 2 & -2 \\
 n_{M,1} & 2 & 1 & -2 \\
 n_{M,2} & 2 & 1 & -2 \\
 n_{Z,1} & 2 & 1 & -2 \\
 n_{Z,2} & 2 & 1 & -2 \\
 n_{A,1} & 1 & 1 & -2 \\
 n_{A,2} & 1 & 0 & 0 \\
 n_{R,1} & 2 & 1 & -2 \\
 n_{R,2} & 2 & 1 & -2 \\
 n_{R,3} & 2 & 1 & -2 \\
 n_{R,4} & 2 & 1 & -2 \\
 n_{X,1} & 2 & 1 & -2 \\
 n_{X,2} & 2 & 1 & -2 \\
 n_{X,3} & 2 & 1 & -2 \\
 n_{X,4} & 2 & 1 & -2
 \end{pmatrix} \tag{115}$$

$$\begin{pmatrix}
 \text{SG115} & a_1 & a_2 & a_3 & a_4 & a_5 \\
 \nu & 4 & 2 & 2 & 2 & -4 \\
 n_{\Gamma,1} & 1 & 0 & 0 & 0 & 0 \\
 n_{\Gamma,2} & 1 & 1 & 1 & 1 & -2 \\
 n_{M,1} & 1 & 0 & 1 & 1 & -2 \\
 n_{M,2} & 1 & 1 & 0 & 0 & 0 \\
 n_{Z,1} & 1 & 1 & 1 & 0 & -2 \\
 n_{Z,2} & 1 & 0 & 0 & 1 & 0 \\
 n_{A,1} & 1 & 1 & 0 & 1 & -2 \\
 n_{A,2} & 1 & 0 & 1 & 0 & 0 \\
 n_{R,1} & 2 & 1 & 1 & 1 & -2 \\
 n_{X,1} & 2 & 1 & 1 & 1 & -2
 \end{pmatrix} \tag{116}$$

$$\begin{pmatrix}
 \text{SG116} & a_1 & a_2 & a_3 \\
 \nu & 4 & 4 & 0 \\
 n_{\Gamma,1} & 1 & 0 & 0 \\
 n_{\Gamma,2} & 1 & 2 & 0 \\
 n_{M,1} & 1 & 2 & -2 \\
 n_{M,2} & 1 & 0 & 2 \\
 n_{Z,1} & 1 & 1 & 0 \\
 n_{Z,2} & 1 & 1 & 0 \\
 n_{A,1} & 1 & 1 & 0 \\
 n_{A,2} & 1 & 1 & 0 \\
 n_{R,1} & 1 & 1 & 0 \\
 n_{X,1} & 2 & 2 & 0
 \end{pmatrix} \tag{117}$$

$$\begin{pmatrix}
 \text{SG117} & a_1 & a_2 & a_3 \\
 \nu & 4 & 4 & 0 \\
 n_{\Gamma,1} & 1 & 0 & 0 \\
 n_{\Gamma,2} & 1 & 2 & 0 \\
 n_{M,1} & 1 & 1 & 0 \\
 n_{M,2} & 1 & 1 & 0 \\
 n_{Z,1} & 1 & 2 & -2 \\
 n_{Z,2} & 1 & 0 & 2 \\
 n_{A,1} & 1 & 1 & 0 \\
 n_{A,2} & 1 & 1 & 0 \\
 n_{R,1} & 1 & 1 & 0 \\
 n_{R,2} & 1 & 1 & 0 \\
 n_{R,3} & 1 & 1 & 0 \\
 n_{R,4} & 1 & 1 & 0 \\
 n_{X,1} & 1 & 1 & 0 \\
 n_{X,2} & 1 & 1 & 0 \\
 n_{X,3} & 1 & 1 & 0 \\
 n_{X,4} & 1 & 1 & 0
 \end{pmatrix} \tag{118}$$

$$\begin{pmatrix} \text{SG118} & a_1 & a_2 & a_3 \\ \nu & 4 & 4 & 0 \\ n_{\Gamma,1} & 1 & 0 & 0 \\ n_{\Gamma,2} & 1 & 2 & 0 \\ n_{M,1} & 1 & 1 & 0 \\ n_{M,2} & 1 & 1 & 0 \\ n_{Z,1} & 1 & 1 & 0 \\ n_{Z,2} & 1 & 1 & 0 \\ n_{A,1} & 1 & 2 & -2 \\ n_{A,2} & 1 & 0 & 2 \\ n_{R,1} & 1 & 1 & 0 \\ n_{R,2} & 1 & 1 & 0 \\ n_{R,3} & 1 & 1 & 0 \\ n_{R,4} & 1 & 1 & 0 \\ n_{X,1} & 1 & 1 & 0 \\ n_{X,2} & 1 & 1 & 0 \\ n_{X,3} & 1 & 1 & 0 \\ n_{X,4} & 1 & 1 & 0 \end{pmatrix} \tag{119}$$

$$\begin{pmatrix} \text{SG119} & a_1 & a_2 & a_3 & a_4 & a_5 \\ \nu & 4 & 2 & 2 & 2 & -4 \\ n_{\Gamma,1} & 1 & 0 & 0 & 0 & 0 \\ n_{\Gamma,2} & 1 & 1 & 1 & 1 & -2 \\ n_{N,1} & 2 & 1 & 1 & 1 & -2 \\ n_{N,2} & 2 & 1 & 1 & 1 & -2 \\ n_{X,1} & 2 & 1 & 1 & 1 & -2 \\ n_{Z,1} & 1 & 1 & 1 & 0 & -2 \\ n_{Z,2} & 1 & 0 & 0 & 1 & 0 \\ n_{P,1} & 1 & 0 & 1 & 1 & -2 \\ n_{P,2} & 1 & 0 & 1 & 0 & 0 \\ n_{P,3} & 1 & 1 & 0 & 0 & 0 \\ n_{P,4} & 1 & 1 & 0 & 1 & -2 \end{pmatrix} \tag{120}$$

$$\begin{pmatrix} \text{SG120} & a_1 & a_2 & a_3 \\ \nu & 4 & 4 & 0 \\ n_{\Gamma,1} & 1 & 0 & 0 \\ n_{\Gamma,2} & 1 & 2 & 0 \\ n_{N,1} & 1 & 1 & 0 \\ n_{N,2} & 1 & 1 & 0 \\ n_{X,1} & 2 & 2 & 0 \\ n_{Z,1} & 1 & 2 & -2 \\ n_{Z,2} & 1 & 0 & 2 \\ n_{P,1} & 1 & 1 & 0 \\ n_{P,2} & 1 & 1 & 0 \\ n_{P,3} & 1 & 1 & 0 \\ n_{P,4} & 1 & 1 & 0 \end{pmatrix} \tag{121}$$

$$\begin{pmatrix} \text{SG121} & a_1 & a_2 & a_3 & a_4 \\ \nu & 4 & 4 & 2 & -4 \\ n_{\Gamma,1} & 1 & 0 & 0 & 0 \\ n_{\Gamma,2} & 1 & 2 & 1 & -2 \\ n_{\text{N},1} & 2 & 2 & 1 & -2 \\ n_{\text{N},2} & 2 & 2 & 1 & -2 \\ n_{\text{X},1} & 2 & 2 & 1 & -2 \\ n_{\text{Z},1} & 1 & 2 & 0 & -2 \\ n_{\text{Z},2} & 1 & 0 & 1 & 0 \\ n_{\text{P},1} & 1 & 1 & 1 & -2 \\ n_{\text{P},2} & 1 & 1 & 0 & 0 \end{pmatrix} \quad (122)$$

$$\begin{pmatrix} \text{SG122} & a_1 & a_2 & a_3 \\ \nu & 8 & 4 & -8 \\ n_{\Gamma,1} & 2 & 0 & -2 \\ n_{\Gamma,2} & 2 & 2 & -2 \\ n_{\text{N},1} & 4 & 2 & -4 \\ n_{\text{N},2} & 4 & 2 & -4 \\ n_{\text{X},1} & 2 & 1 & -2 \\ n_{\text{X},2} & 2 & 1 & -2 \\ n_{\text{X},3} & 2 & 1 & -2 \\ n_{\text{X},4} & 2 & 1 & -2 \\ n_{\text{Z},1} & 2 & 1 & -2 \\ n_{\text{Z},2} & 2 & 1 & -2 \\ n_{\text{P},1} & 1 & 1 & -2 \\ n_{\text{P},2} & 1 & 1 & -2 \\ n_{\text{P},3} & 1 & 0 & 0 \\ n_{\text{P},4} & 1 & 0 & 0 \\ n_{\text{P},5} & 2 & 1 & -2 \end{pmatrix} \quad (123)$$

$$\begin{pmatrix} \text{SG123} & a_1 & a_2 & a_3 & a_4 & a_5 & a_6 & a_7 & a_8 & a_9 & a_{10} & a_{11} & a_{12} & a_{13} \\ \nu & 8 & 4 & 4 & 4 & 4 & 2 & 2 & 2 & -48 & 2 & 8 & 40 & 0 \\ n_{\Gamma,1} & 1 & 1 & 1 & 1 & 1 & 1 & 0 & 1 & -14 & 1 & 2 & 12 & 0 \\ n_{\Gamma,2} & 1 & 0 & 0 & 1 & 1 & 0 & 1 & 0 & -6 & 0 & 2 & 4 & 0 \\ n_{\Gamma,3} & 1 & 1 & 1 & 0 & 0 & 0 & 0 & 0 & -4 & 0 & 0 & 4 & 0 \\ n_{\Gamma,4} & 1 & 0 & 0 & 0 & 0 & 0 & 0 & 0 & 0 & 0 & 0 & 0 & 0 \\ n_{\text{M},1} & 1 & 0 & 1 & 0 & 0 & 0 & 1 & 0 & -6 & 1 & -2 & 8 & 0 \\ n_{\text{M},2} & 1 & 1 & 0 & 0 & 0 & 1 & 0 & 1 & -6 & 0 & 2 & 4 & 0 \\ n_{\text{M},3} & 1 & 0 & 1 & 1 & 1 & 0 & 0 & 0 & -6 & 0 & 2 & 4 & 0 \\ n_{\text{M},4} & 1 & 1 & 0 & 1 & 1 & 0 & 0 & 0 & -6 & 0 & 2 & 4 & 0 \\ n_{\text{Z},1} & 1 & 1 & 1 & 1 & 0 & 0 & 0 & 1 & -5 & 0 & 2 & 4 & 0 \\ n_{\text{Z},2} & 1 & 0 & 0 & 1 & 0 & 0 & 0 & 0 & 0 & 0 & 0 & 0 & 0 \\ n_{\text{Z},3} & 1 & 1 & 1 & 0 & 1 & 1 & 0 & 0 & -13 & 1 & 0 & 12 & 0 \\ n_{\text{Z},4} & 1 & 0 & 0 & 0 & 1 & 0 & 1 & 0 & -6 & 0 & 2 & 4 & 0 \\ n_{\text{A},1} & 1 & 0 & 1 & 0 & 1 & 0 & 0 & 0 & -11 & 0 & 0 & 12 & -8 \\ n_{\text{A},2} & 1 & 1 & 0 & 0 & 1 & 0 & 0 & 1 & -6 & 0 & 2 & 4 & 0 \\ n_{\text{A},3} & 1 & 0 & 1 & 1 & 0 & 0 & 1 & 0 & -1 & 1 & 0 & 0 & 8 \\ n_{\text{A},4} & 1 & 1 & 0 & 1 & 0 & 1 & 0 & 0 & -6 & 0 & 2 & 4 & 0 \\ n_{\text{R},1} & 2 & 1 & 1 & 1 & 1 & 1 & 1 & 0 & -15 & 0 & 4 & 12 & 0 \\ n_{\text{R},2} & 2 & 1 & 1 & 1 & 1 & 0 & 0 & 1 & -9 & 1 & 0 & 8 & 0 \\ n_{\text{X},1} & 2 & 1 & 1 & 1 & 1 & 0 & 0 & 0 & -8 & 1 & 0 & 8 & 0 \\ n_{\text{X},2} & 2 & 1 & 1 & 1 & 1 & 1 & 1 & 1 & -16 & 0 & 4 & 12 & 0 \end{pmatrix} \quad (124)$$

$$\begin{pmatrix}
 \text{SG124} & a_1 & a_2 & a_3 & a_4 & a_5 & a_6 & a_7 & a_8 \\
 \nu & 8 & 4 & 4 & 8 & 4 & -36 & 40 & -32 \\
 n_{\Gamma,1} & 1 & 1 & 1 & 2 & 2 & -10 & 12 & -8 \\
 n_{\Gamma,2} & 1 & 0 & 0 & 2 & 0 & 0 & 0 & 0 \\
 n_{\Gamma,3} & 1 & 1 & 1 & 0 & 0 & -8 & 8 & -8 \\
 n_{\Gamma,4} & 1 & 0 & 0 & 0 & 0 & 0 & 0 & 0 \\
 n_{M,1} & 1 & 0 & 1 & 0 & 0 & -12 & 14 & -16 \\
 n_{M,2} & 1 & 1 & 0 & 0 & 2 & -2 & 2 & 0 \\
 n_{M,3} & 1 & 0 & 1 & 2 & 0 & -2 & 2 & 0 \\
 n_{M,4} & 1 & 1 & 0 & 2 & 0 & -2 & 2 & 0 \\
 n_{Z,1} & 1 & 1 & 1 & 1 & 1 & -9 & 10 & -8 \\
 n_{Z,2} & 1 & 1 & 1 & 1 & 1 & -9 & 10 & -8 \\
 n_{Z,3} & 1 & 0 & 0 & 1 & 0 & 0 & 0 & 0 \\
 n_{Z,4} & 1 & 0 & 0 & 1 & 0 & 0 & 0 & 0 \\
 n_{A,1} & 1 & 0 & 1 & 1 & 0 & -7 & 8 & -8 \\
 n_{A,2} & 1 & 0 & 1 & 1 & 0 & -7 & 8 & -8 \\
 n_{A,3} & 1 & 1 & 0 & 1 & 1 & -2 & 2 & 0 \\
 n_{A,4} & 1 & 1 & 0 & 1 & 1 & -2 & 2 & 0 \\
 n_{R,1} & 2 & 1 & 1 & 2 & 1 & -9 & 10 & -8 \\
 n_{R,2} & 2 & 1 & 1 & 2 & 1 & -9 & 10 & -8 \\
 n_{X,1} & 2 & 1 & 1 & 2 & 0 & -8 & 10 & -8 \\
 n_{X,2} & 2 & 1 & 1 & 2 & 2 & -10 & 10 & -8
 \end{pmatrix}
 \tag{125}$$

$$\begin{pmatrix}
 \text{SG125} & a_1 & a_2 & a_3 & a_4 & a_5 & a_6 \\
 \nu & 8 & 4 & 0 & -4 & 8 & -16 \\
 n_{\Gamma,1} & 1 & 1 & 0 & -1 & 2 & -4 \\
 n_{\Gamma,2} & 1 & 0 & 0 & -2 & 2 & -4 \\
 n_{\Gamma,3} & 1 & 1 & 0 & 0 & 0 & 0 \\
 n_{\Gamma,4} & 1 & 0 & 0 & 1 & 0 & 0 \\
 n_{M,1} & 2 & 1 & 0 & -1 & 2 & -4 \\
 n_{Z,1} & 1 & 1 & 1 & 2 & -2 & 0 \\
 n_{Z,2} & 1 & 0 & -1 & -1 & 2 & -4 \\
 n_{Z,3} & 1 & 1 & -1 & -3 & 4 & -4 \\
 n_{Z,4} & 1 & 0 & 1 & 0 & 0 & 0 \\
 n_{A,1} & 2 & 1 & 0 & -1 & 2 & -4 \\
 n_{R,1} & 2 & 1 & 0 & -1 & 2 & -4 \\
 n_{R,2} & 2 & 1 & 0 & -1 & 2 & -4 \\
 n_{X,1} & 2 & 1 & 0 & -1 & 2 & -4 \\
 n_{X,2} & 2 & 1 & 0 & -1 & 2 & -4
 \end{pmatrix}
 \tag{126}$$

$$\begin{pmatrix}
 \text{SG126} & a_1 & a_2 & a_3 & a_4 \\
 \nu & 8 & 8 & 4 & 0 \\
 n_{\Gamma,1} & 1 & 2 & 1 & 0 \\
 n_{\Gamma,2} & 1 & 0 & 0 & -4 \\
 n_{\Gamma,3} & 1 & 0 & 1 & 0 \\
 n_{\Gamma,4} & 1 & 2 & 0 & 4 \\
 n_{\text{M},1} & 2 & 2 & 1 & 0 \\
 n_{\text{Z},1} & 1 & 1 & 1 & 0 \\
 n_{\text{Z},2} & 1 & 1 & 1 & 0 \\
 n_{\text{Z},3} & 1 & 1 & 0 & 0 \\
 n_{\text{Z},4} & 1 & 1 & 0 & 0 \\
 n_{\text{A},1} & 2 & 2 & 1 & 0 \\
 n_{\text{R},1} & 2 & 2 & 1 & 0 \\
 n_{\text{R},2} & 2 & 2 & 1 & 0 \\
 n_{\text{X},1} & 2 & 2 & 1 & 0 \\
 n_{\text{X},2} & 2 & 2 & 1 & 0
 \end{pmatrix}
 \tag{127}$$

$$\begin{pmatrix}
 \text{SG127} & a_1 & a_2 & a_3 & a_4 & a_5 & a_6 & a_7 & a_8 \\
 \nu & 8 & 8 & 4 & 4 & 4 & -28 & 32 & 0 \\
 n_{\Gamma,1} & 1 & 2 & 1 & 1 & 2 & -10 & 12 & 0 \\
 n_{\Gamma,2} & 1 & 0 & 1 & 1 & 0 & 0 & 0 & 0 \\
 n_{\Gamma,3} & 1 & 2 & 0 & 0 & 0 & -4 & 4 & 0 \\
 n_{\Gamma,4} & 1 & 0 & 0 & 0 & 0 & 0 & 0 & 0 \\
 n_{\text{M},1} & 1 & 1 & 1 & 1 & 0 & -4 & 4 & 0 \\
 n_{\text{M},2} & 1 & 1 & 1 & 1 & 0 & -4 & 4 & 0 \\
 n_{\text{M},3} & 1 & 1 & 0 & 0 & 1 & -3 & 4 & 0 \\
 n_{\text{M},4} & 1 & 1 & 0 & 0 & 1 & -3 & 4 & 0 \\
 n_{\text{Z},1} & 1 & 2 & 1 & 0 & 0 & -10 & 12 & -8 \\
 n_{\text{Z},2} & 1 & 0 & 1 & 0 & 0 & 0 & 0 & 0 \\
 n_{\text{Z},3} & 1 & 2 & 0 & 1 & 2 & -4 & 4 & 8 \\
 n_{\text{Z},4} & 1 & 0 & 0 & 1 & 0 & 0 & 0 & 0 \\
 n_{\text{A},1} & 1 & 1 & 1 & 0 & 1 & -4 & 4 & 0 \\
 n_{\text{A},2} & 1 & 1 & 1 & 0 & 1 & -4 & 4 & 0 \\
 n_{\text{A},3} & 1 & 1 & 0 & 1 & 0 & -3 & 4 & 0 \\
 n_{\text{A},4} & 1 & 1 & 0 & 1 & 0 & -3 & 4 & 0 \\
 n_{\text{R},1} & 2 & 2 & 1 & 1 & 1 & -7 & 8 & 0 \\
 n_{\text{R},2} & 2 & 2 & 1 & 1 & 1 & -7 & 8 & 0 \\
 n_{\text{X},1} & 2 & 2 & 1 & 1 & 1 & -7 & 8 & 0 \\
 n_{\text{X},2} & 2 & 2 & 1 & 1 & 1 & -7 & 8 & 0
 \end{pmatrix}
 \tag{128}$$



$$\begin{pmatrix}
 \text{SG128} & a_1 & a_2 & a_3 & a_4 & a_5 & a_6 & a_7 \\
 \nu & 8 & 8 & 8 & 4 & 4 & 4 & -96 \\
 n_{\Gamma,1} & 1 & 2 & 2 & 2 & 0 & 2 & -24 \\
 n_{\Gamma,2} & 1 & 0 & 2 & 0 & 2 & 0 & -16 \\
 n_{\Gamma,3} & 1 & 2 & 0 & 0 & 0 & 0 & -8 \\
 n_{\Gamma,4} & 1 & 0 & 0 & 0 & 0 & 0 & 0 \\
 n_{\text{M},1} & 1 & 1 & 2 & 0 & 0 & 0 & -8 \\
 n_{\text{M},2} & 1 & 1 & 2 & 0 & 0 & 0 & -8 \\
 n_{\text{M},3} & 1 & 1 & 0 & 1 & 1 & 1 & -16 \\
 n_{\text{M},4} & 1 & 1 & 0 & 1 & 1 & 1 & -16 \\
 n_{\text{Z},1} & 1 & 2 & 1 & 1 & 0 & 1 & -16 \\
 n_{\text{Z},2} & 1 & 2 & 1 & 1 & 0 & 1 & -16 \\
 n_{\text{Z},3} & 1 & 0 & 1 & 0 & 1 & 0 & -8 \\
 n_{\text{Z},4} & 1 & 0 & 1 & 0 & 1 & 0 & -8 \\
 n_{\text{A},1} & 1 & 1 & 1 & 0 & 1 & 1 & -16 \\
 n_{\text{A},2} & 1 & 1 & 1 & 0 & 1 & 1 & -16 \\
 n_{\text{A},3} & 1 & 1 & 1 & 1 & 0 & 0 & -8 \\
 n_{\text{A},4} & 1 & 1 & 1 & 1 & 0 & 0 & -8 \\
 n_{\text{R},1} & 1 & 1 & 1 & 0 & 0 & 1 & -8 \\
 n_{\text{R},2} & 1 & 1 & 1 & 0 & 0 & 1 & -8 \\
 n_{\text{R},3} & 1 & 1 & 1 & 0 & 0 & 1 & -8 \\
 n_{\text{R},4} & 1 & 1 & 1 & 0 & 0 & 1 & -8 \\
 n_{\text{R},5} & 1 & 1 & 1 & 1 & 1 & 0 & -16 \\
 n_{\text{R},6} & 1 & 1 & 1 & 1 & 1 & 0 & -16 \\
 n_{\text{R},7} & 1 & 1 & 1 & 1 & 1 & 0 & -16 \\
 n_{\text{R},8} & 1 & 1 & 1 & 1 & 1 & 0 & -16 \\
 n_{\text{X},1} & 2 & 2 & 2 & 1 & 1 & 1 & -24 \\
 n_{\text{X},2} & 2 & 2 & 2 & 1 & 1 & 1 & -24
 \end{pmatrix}
 \tag{129}$$

$$\begin{pmatrix}
 \text{SG129} & a_1 & a_2 & a_3 & a_4 & a_5 & a_6 \\
 \nu & 8 & 0 & 0 & 4 & 0 & -16 \\
 n_{\Gamma,1} & 1 & 0 & 0 & 1 & 0 & -4 \\
 n_{\Gamma,2} & 1 & 0 & -2 & 0 & 2 & -4 \\
 n_{\Gamma,3} & 1 & 0 & 1 & 1 & -2 & 0 \\
 n_{\Gamma,4} & 1 & 0 & 1 & 0 & 0 & 0 \\
 n_{\text{M},1} & 2 & 0 & 0 & 1 & 0 & -4 \\
 n_{\text{Z},1} & 1 & 1 & 3 & 1 & -4 & 0 \\
 n_{\text{Z},2} & 1 & -1 & -1 & 0 & 2 & -4 \\
 n_{\text{Z},3} & 1 & -1 & -2 & 1 & 2 & -4 \\
 n_{\text{Z},4} & 1 & 1 & 0 & 0 & 0 & 0 \\
 n_{\text{A},1} & 2 & 0 & 0 & 1 & 0 & -4 \\
 n_{\text{R},1} & 2 & 0 & 0 & 1 & 0 & -4 \\
 n_{\text{R},2} & 2 & 0 & 0 & 1 & 0 & -4 \\
 n_{\text{X},1} & 2 & 0 & 0 & 1 & 0 & -4 \\
 n_{\text{X},2} & 2 & 0 & 0 & 1 & 0 & -4
 \end{pmatrix}
 \tag{130}$$

$$\begin{pmatrix} \text{SG130} & a_1 & a_2 & a_3 & a_4 \\ \nu & 8 & 8 & 8 & 0 \\ n_{\Gamma,1} & 1 & 2 & 2 & 0 \\ n_{\Gamma,2} & 1 & 0 & 0 & -4 \\ n_{\Gamma,3} & 1 & 0 & 2 & 0 \\ n_{\Gamma,4} & 1 & 2 & 0 & 4 \\ n_{\text{M},1} & 2 & 2 & 2 & 0 \\ n_{\text{Z},1} & 1 & 1 & 2 & 0 \\ n_{\text{Z},2} & 1 & 1 & 2 & 0 \\ n_{\text{Z},3} & 1 & 1 & 0 & 0 \\ n_{\text{Z},4} & 1 & 1 & 0 & 0 \\ n_{\text{A},1} & 1 & 1 & 1 & 0 \\ n_{\text{R},1} & 1 & 1 & 1 & 0 \\ n_{\text{R},2} & 1 & 1 & 1 & 0 \\ n_{\text{X},1} & 2 & 2 & 2 & 0 \\ n_{\text{X},2} & 2 & 2 & 2 & 0 \end{pmatrix} \quad (131)$$

$$\begin{pmatrix} \text{SG131} & a_1 & a_2 & a_3 & a_4 & a_5 & a_6 & a_7 \\ \nu & 8 & 4 & 4 & 4 & -28 & 32 & -32 \\ n_{\Gamma,1} & 1 & 1 & 1 & 1 & -7 & 8 & -8 \\ n_{\Gamma,2} & 1 & 0 & 0 & 1 & -3 & 4 & -4 \\ n_{\Gamma,3} & 1 & 0 & 0 & 0 & 0 & 0 & 0 \\ n_{\Gamma,4} & 1 & 1 & 1 & 0 & -4 & 4 & -4 \\ n_{\text{M},1} & 1 & 0 & 1 & 0 & -3 & 4 & -4 \\ n_{\text{M},2} & 1 & 1 & 0 & 0 & -3 & 4 & -4 \\ n_{\text{M},3} & 1 & 1 & 0 & 1 & -4 & 4 & -4 \\ n_{\text{M},4} & 1 & 0 & 1 & 1 & -4 & 4 & -4 \\ n_{\text{Z},1} & 2 & 1 & 1 & 1 & -7 & 8 & -8 \\ n_{\text{A},1} & 2 & 1 & 1 & 1 & -7 & 8 & -8 \\ n_{\text{R},1} & 2 & 1 & 1 & 2 & -9 & 10 & -8 \\ n_{\text{R},2} & 2 & 1 & 1 & 0 & -5 & 6 & -8 \\ n_{\text{X},1} & 2 & 1 & 1 & 1 & -4 & 4 & -4 \\ n_{\text{X},2} & 2 & 1 & 1 & 1 & -10 & 12 & -12 \end{pmatrix} \quad (132)$$

$$\begin{pmatrix} \text{SG132} & a_1 & a_2 & a_3 & a_4 & a_5 & a_6 \\ \nu & 8 & -12 & 4 & 4 & 8 & -32 \\ n_{\Gamma,1} & 1 & -3 & 1 & 1 & 2 & -8 \\ n_{\Gamma,2} & 1 & -1 & 0 & 1 & 0 & -4 \\ n_{\Gamma,3} & 1 & 0 & 0 & 0 & 0 & 0 \\ n_{\Gamma,4} & 1 & -2 & 1 & 0 & 2 & -4 \\ n_{\text{M},1} & 1 & -2 & 0 & 1 & 2 & -4 \\ n_{\text{M},2} & 1 & -2 & 1 & 1 & 0 & -4 \\ n_{\text{M},3} & 1 & -1 & 1 & 0 & 0 & -4 \\ n_{\text{M},4} & 1 & -1 & 0 & 0 & 2 & -4 \\ n_{\text{Z},1} & 2 & -3 & 1 & 1 & 2 & -8 \\ n_{\text{A},1} & 2 & -3 & 1 & 1 & 2 & -8 \\ n_{\text{R},1} & 2 & -3 & 1 & 1 & 2 & -8 \\ n_{\text{R},2} & 2 & -3 & 1 & 1 & 2 & -8 \\ n_{\text{X},1} & 2 & 0 & 1 & 0 & 0 & -4 \\ n_{\text{X},2} & 2 & -6 & 1 & 2 & 4 & -12 \end{pmatrix} \quad (133)$$

$$\begin{pmatrix} \text{SG133} & a_1 & a_2 & a_3 \\ \nu & 8 & 8 & 0 \\ n_{\Gamma,1} & 1 & 2 & 0 \\ n_{\Gamma,2} & 1 & 0 & -4 \\ n_{\Gamma,3} & 1 & 0 & 0 \\ n_{\Gamma,4} & 1 & 2 & 4 \\ n_{M,1} & 2 & 2 & 0 \\ n_{Z,1} & 2 & 2 & 0 \\ n_{A,1} & 1 & 1 & 0 \\ n_{A,2} & 1 & 1 & 0 \\ n_{A,3} & 1 & 1 & 0 \\ n_{A,4} & 1 & 1 & 0 \\ n_{R,1} & 2 & 2 & 0 \\ n_{R,2} & 2 & 2 & 0 \\ n_{X,1} & 2 & 2 & 0 \\ n_{X,2} & 2 & 2 & 0 \end{pmatrix} \tag{134}$$

$$\begin{pmatrix} \text{SG134} & a_1 & a_2 & a_3 & a_4 & a_5 \\ \nu & 8 & 0 & -4 & 8 & -16 \\ n_{\Gamma,1} & 1 & 0 & -1 & 2 & -4 \\ n_{\Gamma,2} & 1 & 0 & -2 & 2 & -4 \\ n_{\Gamma,3} & 1 & 0 & 0 & 0 & 0 \\ n_{\Gamma,4} & 1 & 0 & 1 & 0 & 0 \\ n_{M,1} & 2 & 0 & -1 & 2 & -4 \\ n_{Z,1} & 2 & 0 & -1 & 2 & -4 \\ n_{A,1} & 1 & -1 & -1 & 2 & -4 \\ n_{A,2} & 1 & 1 & 2 & -2 & 0 \\ n_{A,3} & 1 & 1 & 0 & 0 & 0 \\ n_{A,4} & 1 & -1 & -3 & 4 & -4 \\ n_{R,1} & 2 & 0 & -1 & 2 & -4 \\ n_{R,2} & 2 & 0 & -1 & 2 & -4 \\ n_{X,1} & 2 & 0 & -1 & 2 & -4 \\ n_{X,2} & 2 & 0 & -1 & 2 & -4 \end{pmatrix} \tag{135}$$

$$\begin{pmatrix} \text{SG135} & a_1 & a_2 & a_3 & a_4 \\ \nu & 8 & 8 & 8 & -32 \\ n_{\Gamma,1} & 1 & 2 & 2 & -8 \\ n_{\Gamma,2} & 1 & 2 & 0 & -4 \\ n_{\Gamma,3} & 1 & 0 & 0 & 0 \\ n_{\Gamma,4} & 1 & 0 & 2 & -4 \\ n_{M,1} & 1 & 2 & 1 & -8 \\ n_{M,2} & 1 & 2 & 1 & -8 \\ n_{M,3} & 1 & 0 & 1 & 0 \\ n_{M,4} & 1 & 0 & 1 & 0 \\ n_{Z,1} & 2 & 2 & 2 & -8 \\ n_{A,1} & 1 & 1 & 1 & -4 \\ n_{R,1} & 2 & 2 & 2 & -8 \\ n_{R,2} & 2 & 2 & 2 & -8 \\ n_{X,1} & 2 & 2 & 2 & -8 \\ n_{X,2} & 2 & 2 & 2 & -8 \end{pmatrix} \tag{136}$$

$$\begin{pmatrix}
 \text{SG136} & a_1 & a_2 & a_3 & a_4 & a_5 \\
 \nu & 8 & 8 & 8 & 4 & -48 \\
 n_{\Gamma,1} & 1 & 2 & 2 & 1 & -12 \\
 n_{\Gamma,2} & 1 & 0 & 2 & 1 & -8 \\
 n_{\Gamma,3} & 1 & 0 & 0 & 0 & 0 \\
 n_{\Gamma,4} & 1 & 2 & 0 & 0 & -4 \\
 n_{\text{M},1} & 1 & 1 & 0 & 1 & -4 \\
 n_{\text{M},2} & 1 & 1 & 0 & 1 & -4 \\
 n_{\text{M},3} & 1 & 1 & 2 & 0 & -8 \\
 n_{\text{M},4} & 1 & 1 & 2 & 0 & -8 \\
 n_{\text{Z},1} & 2 & 2 & 2 & 1 & -12 \\
 n_{\text{A},1} & 2 & 2 & 2 & 1 & -12 \\
 n_{\text{R},1} & 1 & 1 & 1 & 0 & -4 \\
 n_{\text{R},2} & 1 & 1 & 1 & 0 & -4 \\
 n_{\text{R},3} & 1 & 1 & 1 & 0 & -4 \\
 n_{\text{R},4} & 1 & 1 & 1 & 0 & -4 \\
 n_{\text{R},5} & 1 & 1 & 1 & 1 & -8 \\
 n_{\text{R},6} & 1 & 1 & 1 & 1 & -8 \\
 n_{\text{R},7} & 1 & 1 & 1 & 1 & -8 \\
 n_{\text{R},8} & 1 & 1 & 1 & 1 & -8 \\
 n_{\text{X},1} & 2 & 2 & 2 & 1 & -12 \\
 n_{\text{X},2} & 2 & 2 & 2 & 1 & -12
 \end{pmatrix}
 \tag{137}$$

$$\begin{pmatrix}
 \text{SG137} & a_1 & a_2 & a_3 & a_4 \\
 \nu & 8 & 0 & 4 & -16 \\
 n_{\Gamma,1} & 1 & 0 & 1 & -4 \\
 n_{\Gamma,2} & 1 & 0 & 0 & -4 \\
 n_{\Gamma,3} & 1 & 0 & 0 & 0 \\
 n_{\Gamma,4} & 1 & 0 & 1 & 0 \\
 n_{\text{M},1} & 2 & 0 & 1 & -4 \\
 n_{\text{Z},1} & 2 & 0 & 1 & -4 \\
 n_{\text{A},1} & 1 & 1 & 0 & 0 \\
 n_{\text{A},2} & 1 & 1 & 0 & 0 \\
 n_{\text{A},3} & 1 & -1 & 1 & -4 \\
 n_{\text{A},4} & 1 & -1 & 1 & -4 \\
 n_{\text{R},1} & 2 & 0 & 1 & -4 \\
 n_{\text{R},2} & 2 & 0 & 1 & -4 \\
 n_{\text{X},1} & 2 & 0 & 1 & -4 \\
 n_{\text{X},2} & 2 & 0 & 1 & -4
 \end{pmatrix}
 \tag{138}$$

$$\begin{pmatrix} \text{SG138} & a_1 & a_2 & a_3 & a_4 \\ \nu & 8 & 8 & 0 & 0 \\ n_{\Gamma,1} & 1 & 2 & 0 & 0 \\ n_{\Gamma,2} & 1 & 2 & -2 & -4 \\ n_{\Gamma,3} & 1 & 0 & 0 & 0 \\ n_{\Gamma,4} & 1 & 0 & 2 & 4 \\ n_{M,1} & 2 & 2 & 0 & 0 \\ n_{Z,1} & 2 & 2 & 0 & 0 \\ n_{A,1} & 1 & 2 & -1 & 0 \\ n_{A,2} & 1 & 2 & -1 & 0 \\ n_{A,3} & 1 & 0 & 1 & 0 \\ n_{A,4} & 1 & 0 & 1 & 0 \\ n_{R,1} & 1 & 1 & 0 & 0 \\ n_{R,2} & 1 & 1 & 0 & 0 \\ n_{X,1} & 2 & 2 & 0 & 0 \\ n_{X,2} & 2 & 2 & 0 & 0 \end{pmatrix} \quad (139)$$

$$\begin{pmatrix} \text{SG139} & a_1 & a_2 & a_3 & a_4 & a_5 & a_6 & a_7 & a_8 & a_9 \\ \nu & 8 & -86 & 4 & 4 & 4 & 2 & 2 & 72 & -112 \\ n_{\Gamma,1} & 1 & -17 & 1 & 1 & 1 & 1 & 0 & 14 & -24 \\ n_{\Gamma,2} & 1 & -12 & 0 & 0 & 1 & 0 & 1 & 10 & -16 \\ n_{\Gamma,3} & 1 & -7 & 1 & 0 & 0 & 0 & 0 & 6 & -8 \\ n_{\Gamma,4} & 1 & -7 & 0 & 1 & 0 & 0 & 0 & 6 & -8 \\ n_{N,1} & 2 & -18 & 1 & 1 & 1 & 0 & 0 & 16 & -24 \\ n_{N,2} & 2 & -18 & 1 & 1 & 1 & 0 & 0 & 16 & -24 \\ n_{N,3} & 2 & -25 & 1 & 1 & 1 & 1 & 1 & 20 & -32 \\ n_{N,4} & 2 & -25 & 1 & 1 & 1 & 1 & 1 & 20 & -32 \\ n_{X,1} & 2 & -25 & 1 & 1 & 0 & 1 & 1 & 22 & -32 \\ n_{X,2} & 2 & -18 & 1 & 1 & 2 & 0 & 0 & 14 & -24 \\ n_{Z,1} & 1 & -12 & 1 & 0 & 1 & 1 & 0 & 10 & -16 \\ n_{Z,2} & 1 & -13 & 0 & 1 & 1 & 0 & 1 & 10 & -16 \\ n_{Z,3} & 1 & -12 & 1 & 1 & 0 & 0 & 0 & 10 & -16 \\ n_{Z,4} & 1 & -6 & 0 & 0 & 0 & 0 & 0 & 6 & -8 \\ n_{P,1} & 2 & -18 & 1 & 1 & 1 & 1 & 0 & 14 & -24 \\ n_{P,2} & 2 & -25 & 1 & 1 & 1 & 0 & 1 & 22 & -32 \end{pmatrix} \quad (140)$$

$$\begin{pmatrix} \text{SG140} & a_1 & a_2 & a_3 & a_4 & a_5 & a_6 & a_7 \\ \nu & 8 & 4 & -8 & 4 & 4 & -24 & -32 \\ n_{\Gamma,1} & 1 & 1 & -1 & 1 & 2 & -4 & 0 \\ n_{\Gamma,2} & 1 & 0 & -1 & 1 & 0 & -4 & -8 \\ n_{\Gamma,3} & 1 & 1 & -2 & 0 & 0 & -4 & -8 \\ n_{\Gamma,4} & 1 & 0 & 0 & 0 & 0 & 0 & 0 \\ n_{N,1} & 2 & 1 & -2 & 1 & 1 & -6 & -8 \\ n_{X,1} & 2 & 1 & -2 & 2 & 0 & -6 & -8 \\ n_{X,2} & 2 & 1 & -2 & 0 & 2 & -6 & -8 \\ n_{Z,1} & 1 & 0 & 0 & 1 & 0 & 0 & 0 \\ n_{Z,2} & 1 & 1 & -2 & 1 & 2 & -4 & 0 \\ n_{Z,3} & 1 & 0 & -1 & 0 & 0 & -4 & -8 \\ n_{Z,4} & 1 & 1 & -1 & 0 & 0 & -4 & -8 \\ n_{P,1} & 2 & 1 & -2 & 1 & 1 & -6 & -8 \\ n_{P,2} & 2 & 1 & -2 & 1 & 1 & -6 & -8 \end{pmatrix} \quad (141)$$

$$\begin{pmatrix} \text{SG141} & a_1 & a_2 & a_3 & a_4 & a_5 \\ \nu & 8 & 8 & -8 & 4 & -16 \\ n_{\Gamma,1} & 1 & 2 & -2 & 1 & -4 \\ n_{\Gamma,2} & 1 & 2 & -2 & 0 & -4 \\ n_{\Gamma,3} & 1 & 0 & 0 & 0 & 0 \\ n_{\Gamma,4} & 1 & 0 & 0 & 1 & 0 \\ n_{\text{N},1} & 2 & 1 & -1 & 1 & -4 \\ n_{\text{N},2} & 2 & 1 & -1 & 1 & -4 \\ n_{\text{N},3} & 2 & 3 & -3 & 1 & -4 \\ n_{\text{N},4} & 2 & 3 & -3 & 1 & -4 \\ n_{\text{X},1} & 2 & 2 & -2 & 1 & -4 \\ n_{\text{X},2} & 2 & 2 & -2 & 1 & -4 \\ n_{\text{Z},1} & 2 & 2 & -2 & 1 & -4 \\ n_{\text{P},1} & 1 & 1 & 0 & 0 & 0 \\ n_{\text{P},2} & 1 & 1 & 0 & 0 & 0 \\ n_{\text{P},3} & 1 & 1 & -2 & 1 & -4 \\ n_{\text{P},4} & 1 & 1 & -2 & 1 & -4 \\ n_{\text{P},5} & 2 & 2 & -2 & 1 & -4 \end{pmatrix} \tag{142}$$

$$\begin{pmatrix} \text{SG142} & a_1 & a_2 & a_3 \\ \nu & 8 & 8 & 0 \\ n_{\Gamma,1} & 1 & 2 & 0 \\ n_{\Gamma,2} & 1 & 0 & -4 \\ n_{\Gamma,3} & 1 & 0 & 0 \\ n_{\Gamma,4} & 1 & 2 & 4 \\ n_{\text{N},1} & 2 & 2 & 0 \\ n_{\text{X},1} & 2 & 2 & 0 \\ n_{\text{X},2} & 2 & 2 & 0 \\ n_{\text{Z},1} & 2 & 2 & 0 \\ n_{\text{P},1} & 1 & 1 & 0 \\ n_{\text{P},2} & 1 & 1 & 0 \\ n_{\text{P},3} & 1 & 1 & 0 \\ n_{\text{P},4} & 1 & 1 & 0 \\ n_{\text{P},5} & 1 & 1 & 0 \end{pmatrix} \tag{143}$$

$$\begin{pmatrix} \text{SG143} & a_1 & a_2 & a_3 & a_4 \\ \nu & 6 & 2 & 2 & 2 \\ n_{\Gamma,1} & 2 & 1 & 1 & 1 \\ n_{\Gamma,2} & 1 & 0 & 0 & 0 \\ n_{\Gamma,3} & 2 & 1 & 1 & 1 \\ n_{\text{M},1} & 3 & 1 & 1 & 1 \\ n_{\text{A},1} & 2 & 1 & 1 & 1 \\ n_{\text{A},2} & 1 & 0 & 0 & 0 \\ n_{\text{A},3} & 2 & 1 & 1 & 1 \\ n_{\text{L},1} & 3 & 1 & 1 & 1 \\ n_{\text{K},1} & 2 & 0 & 1 & 1 \\ n_{\text{K},2} & 2 & 1 & 1 & 0 \\ n_{\text{K},3} & 2 & 1 & 0 & 1 \\ n_{\text{H},1} & 2 & 0 & 1 & 1 \\ n_{\text{H},2} & 2 & 1 & 1 & 0 \\ n_{\text{H},3} & 2 & 1 & 0 & 1 \end{pmatrix} \tag{144}$$

$$\begin{pmatrix} \text{SG144} & a_1 \\ \nu & 6 \\ n_{\Gamma,1} & 2 \\ n_{\Gamma,2} & 1 \\ n_{\Gamma,3} & 2 \\ n_{\text{M},1} & 3 \\ n_{\text{A},1} & 2 \\ n_{\text{A},2} & 1 \\ n_{\text{A},3} & 2 \\ n_{\text{L},1} & 3 \\ n_{\text{K},1} & 2 \\ n_{\text{K},2} & 2 \\ n_{\text{K},3} & 2 \\ n_{\text{H},1} & 2 \\ n_{\text{H},2} & 2 \\ n_{\text{H},3} & 2 \end{pmatrix} \tag{145}$$

$$\begin{pmatrix} \text{SG145} & a_1 \\ \nu & 6 \\ n_{\Gamma,1} & 2 \\ n_{\Gamma,2} & 1 \\ n_{\Gamma,3} & 2 \\ n_{\text{M},1} & 3 \\ n_{\text{A},1} & 2 \\ n_{\text{A},2} & 1 \\ n_{\text{A},3} & 2 \\ n_{\text{L},1} & 3 \\ n_{\text{K},1} & 2 \\ n_{\text{K},2} & 2 \\ n_{\text{K},3} & 2 \\ n_{\text{H},1} & 2 \\ n_{\text{H},2} & 2 \\ n_{\text{H},3} & 2 \end{pmatrix} \tag{146}$$

$$\begin{pmatrix} \text{SG146} & a_1 & a_2 \\ \nu & 6 & 2 \\ n_{\Gamma,1} & 2 & 1 \\ n_{\Gamma,2} & 1 & 0 \\ n_{\Gamma,3} & 2 & 1 \\ n_{\text{Z},1} & 2 & 1 \\ n_{\text{Z},2} & 1 & 0 \\ n_{\text{Z},3} & 2 & 1 \\ n_{\text{L},1} & 3 & 1 \\ n_{\text{F},1} & 3 & 1 \end{pmatrix} \tag{147}$$

$$\left( \begin{array}{c|cccccccc}
 \text{SG147} & a_1 & a_2 & a_3 & a_4 & a_5 & a_6 & a_7 & a_8 & a_9 \\
 \nu & 12 & 6 & 6 & 4 & 4 & 2 & -10 & 12 & -8 \\
 n_{\Gamma,1} & 2 & 2 & 2 & 1 & 1 & 1 & -5 & 6 & -4 \\
 n_{\Gamma,2} & 1 & 1 & 1 & 0 & 0 & 0 & 0 & 0 & 0 \\
 n_{\Gamma,3} & 2 & 2 & 2 & 1 & 1 & 1 & -5 & 6 & -4 \\
 n_{\Gamma,4} & 1 & 0 & 0 & 0 & 0 & 0 & 0 & 0 & 0 \\
 n_{\Gamma,5} & 2 & 0 & 0 & 1 & 1 & 0 & 0 & 0 & 0 \\
 n_{\Gamma,6} & 2 & 0 & 0 & 1 & 1 & 0 & 0 & 0 & 0 \\
 n_{M,1} & 3 & 1 & 1 & 1 & 1 & 1 & -3 & 4 & -4 \\
 n_{M,2} & 3 & 2 & 2 & 1 & 1 & 0 & -2 & 2 & 0 \\
 n_{A,1} & 2 & 0 & 2 & 1 & 1 & 0 & -3 & 4 & -4 \\
 n_{A,2} & 1 & 0 & 1 & 0 & 0 & 0 & 0 & 0 & 0 \\
 n_{A,3} & 2 & 0 & 2 & 1 & 1 & 0 & -3 & 4 & -4 \\
 n_{A,4} & 1 & 1 & 0 & 0 & 0 & 0 & 0 & 0 & 0 \\
 n_{A,5} & 2 & 2 & 0 & 1 & 1 & 1 & -2 & 2 & 0 \\
 n_{A,6} & 2 & 2 & 0 & 1 & 1 & 1 & -2 & 2 & 0 \\
 n_{L,1} & 3 & 2 & 1 & 1 & 1 & 0 & -1 & 2 & 0 \\
 n_{L,2} & 3 & 1 & 2 & 1 & 1 & 1 & -4 & 4 & -4 \\
 n_{K,1} & 4 & 2 & 2 & 1 & 2 & 1 & -5 & 6 & -4 \\
 n_{K,2} & 2 & 1 & 1 & 1 & 0 & 0 & 0 & 0 & 0 \\
 n_{K,3} & 4 & 2 & 2 & 1 & 2 & 1 & -5 & 6 & -4 \\
 n_{H,1} & 4 & 2 & 2 & 1 & 2 & 1 & -5 & 6 & -4 \\
 n_{H,2} & 2 & 1 & 1 & 1 & 0 & 0 & 0 & 0 & 0 \\
 n_{H,3} & 4 & 2 & 2 & 1 & 2 & 1 & -5 & 6 & -4
 \end{array} \right) \tag{148}$$

$$\left( \begin{array}{c|cccccccc}
 \text{SG148} & a_1 & a_2 & a_3 & a_4 & a_5 & a_6 & a_7 & a_8 \\
 \nu & 12 & 6 & 6 & 4 & 2 & -10 & 12 & -8 \\
 n_{\Gamma,1} & 2 & 2 & 2 & 1 & 1 & -5 & 6 & -4 \\
 n_{\Gamma,2} & 1 & 1 & 1 & 0 & 0 & 0 & 0 & 0 \\
 n_{\Gamma,3} & 2 & 2 & 2 & 1 & 1 & -5 & 6 & -4 \\
 n_{\Gamma,4} & 1 & 0 & 0 & 0 & 0 & 0 & 0 & 0 \\
 n_{\Gamma,5} & 2 & 0 & 0 & 1 & 0 & 0 & 0 & 0 \\
 n_{\Gamma,6} & 2 & 0 & 0 & 1 & 0 & 0 & 0 & 0 \\
 n_{Z,1} & 2 & 2 & 0 & 1 & 0 & -3 & 4 & -4 \\
 n_{Z,2} & 1 & 1 & 0 & 0 & 0 & 0 & 0 & 0 \\
 n_{Z,3} & 2 & 2 & 0 & 1 & 0 & -3 & 4 & -4 \\
 n_{Z,4} & 1 & 0 & 1 & 0 & 0 & 0 & 0 & 0 \\
 n_{Z,5} & 2 & 0 & 2 & 1 & 1 & -2 & 2 & 0 \\
 n_{Z,6} & 2 & 0 & 2 & 1 & 1 & -2 & 2 & 0 \\
 n_{L,1} & 3 & 1 & 2 & 1 & 0 & -1 & 2 & 0 \\
 n_{L,2} & 3 & 2 & 1 & 1 & 1 & -4 & 4 & -4 \\
 n_{F,1} & 3 & 1 & 1 & 1 & 1 & -3 & 4 & -4 \\
 n_{F,2} & 3 & 2 & 2 & 1 & 0 & -2 & 2 & 0
 \end{array} \right) \tag{149}$$



$$\begin{pmatrix}
 \text{SG149} & a_1 & a_2 & a_3 & a_4 \\
 \nu & 6 & 2 & 2 & 2 \\
 n_{\Gamma,1} & 1 & 0 & 0 & 0 \\
 n_{\Gamma,2} & 1 & 0 & 0 & 0 \\
 n_{\Gamma,3} & 2 & 1 & 1 & 1 \\
 n_{M,1} & 3 & 1 & 1 & 1 \\
 n_{M,2} & 3 & 1 & 1 & 1 \\
 n_{A,1} & 1 & 0 & 0 & 0 \\
 n_{A,2} & 1 & 0 & 0 & 0 \\
 n_{A,3} & 2 & 1 & 1 & 1 \\
 n_{L,1} & 3 & 1 & 1 & 1 \\
 n_{L,2} & 3 & 1 & 1 & 1 \\
 n_{K,1} & 2 & 0 & 1 & 1 \\
 n_{K,2} & 2 & 1 & 1 & 0 \\
 n_{K,3} & 2 & 1 & 0 & 1 \\
 n_{H,1} & 2 & 0 & 1 & 1 \\
 n_{H,2} & 2 & 1 & 1 & 0 \\
 n_{H,3} & 2 & 1 & 0 & 1
 \end{pmatrix} \tag{150}$$

$$\begin{pmatrix}
 \text{SG150} & a_1 & a_2 & a_3 \\
 \nu & 6 & 4 & 2 \\
 n_{\Gamma,1} & 1 & 0 & 0 \\
 n_{\Gamma,2} & 1 & 0 & 0 \\
 n_{\Gamma,3} & 2 & 2 & 1 \\
 n_{M,1} & 3 & 2 & 1 \\
 n_{M,2} & 3 & 2 & 1 \\
 n_{A,1} & 1 & 0 & 0 \\
 n_{A,2} & 1 & 0 & 0 \\
 n_{A,3} & 2 & 2 & 1 \\
 n_{L,1} & 3 & 2 & 1 \\
 n_{L,2} & 3 & 2 & 1 \\
 n_{K,1} & 1 & 1 & 0 \\
 n_{K,2} & 1 & 1 & 0 \\
 n_{K,3} & 2 & 1 & 1 \\
 n_{H,1} & 1 & 1 & 0 \\
 n_{H,2} & 1 & 1 & 0 \\
 n_{H,3} & 2 & 1 & 1
 \end{pmatrix} \tag{151}$$

$$\begin{array}{c}
 \text{SG151} \\
 \nu \\
 n_{\Gamma,1} \\
 n_{\Gamma,2} \\
 n_{\Gamma,3} \\
 n_{M,1} \\
 n_{M,2} \\
 n_{A,1} \\
 n_{A,2} \\
 n_{A,3} \\
 n_{L,1} \\
 n_{L,2} \\
 n_{K,1} \\
 n_{K,2} \\
 n_{K,3} \\
 n_{H,1} \\
 n_{H,2} \\
 n_{H,3}
 \end{array}
 \begin{array}{c}
 a_1 \\
 6 \\
 1 \\
 1 \\
 2 \\
 3 \\
 3 \\
 1 \\
 1 \\
 2 \\
 3 \\
 3 \\
 2 \\
 2 \\
 2 \\
 2 \\
 2 \\
 2 \\
 2
 \end{array}
 \tag{152}$$

$$\begin{array}{c}
 \text{SG152} \\
 \nu \\
 n_{\Gamma,1} \\
 n_{\Gamma,2} \\
 n_{\Gamma,3} \\
 n_{M,1} \\
 n_{M,2} \\
 n_{A,1} \\
 n_{A,2} \\
 n_{A,3} \\
 n_{L,1} \\
 n_{L,2} \\
 n_{K,1} \\
 n_{K,2} \\
 n_{K,3} \\
 n_{H,1} \\
 n_{H,2} \\
 n_{H,3}
 \end{array}
 \begin{array}{c}
 a_1 \\
 6 \\
 1 \\
 1 \\
 2 \\
 3 \\
 3 \\
 1 \\
 1 \\
 2 \\
 3 \\
 3 \\
 1 \\
 1 \\
 2 \\
 1 \\
 1 \\
 2
 \end{array}
 \tag{153}$$

$$\begin{pmatrix} \text{SG153} & a_1 \\ \nu & 6 \\ n_{\Gamma,1} & 1 \\ n_{\Gamma,2} & 1 \\ n_{\Gamma,3} & 2 \\ n_{M,1} & 3 \\ n_{M,2} & 3 \\ n_{A,1} & 1 \\ n_{A,2} & 1 \\ n_{A,3} & 2 \\ n_{L,1} & 3 \\ n_{L,2} & 3 \\ n_{K,1} & 2 \\ n_{K,2} & 2 \\ n_{K,3} & 2 \\ n_{H,1} & 2 \\ n_{H,2} & 2 \\ n_{H,3} & 2 \end{pmatrix} \tag{154}$$

$$\begin{pmatrix} \text{SG154} & a_1 \\ \nu & 6 \\ n_{\Gamma,1} & 1 \\ n_{\Gamma,2} & 1 \\ n_{\Gamma,3} & 2 \\ n_{M,1} & 3 \\ n_{M,2} & 3 \\ n_{A,1} & 1 \\ n_{A,2} & 1 \\ n_{A,3} & 2 \\ n_{L,1} & 3 \\ n_{L,2} & 3 \\ n_{K,1} & 1 \\ n_{K,2} & 1 \\ n_{K,3} & 2 \\ n_{H,1} & 1 \\ n_{H,2} & 1 \\ n_{H,3} & 2 \end{pmatrix} \tag{155}$$

$$\begin{pmatrix} \text{SG155} & a_1 & a_2 \\ \nu & 6 & 2 \\ n_{\Gamma,1} & 1 & 0 \\ n_{\Gamma,2} & 1 & 0 \\ n_{\Gamma,3} & 2 & 1 \\ n_{Z,1} & 1 & 0 \\ n_{Z,2} & 1 & 0 \\ n_{Z,3} & 2 & 1 \\ n_{L,1} & 3 & 1 \\ n_{L,2} & 3 & 1 \\ n_{F,1} & 3 & 1 \\ n_{F,2} & 3 & 1 \end{pmatrix} \tag{156}$$

$$\begin{pmatrix}
 \text{SG156} & a_1 & a_2 & a_3 & a_4 \\
 \nu & 6 & -2 & -2 & -2 \\
 n_{\Gamma,1} & 1 & 0 & 0 & 0 \\
 n_{\Gamma,2} & 1 & 0 & 0 & 0 \\
 n_{\Gamma,3} & 2 & -1 & -1 & -1 \\
 n_{M,1} & 3 & -1 & -1 & -1 \\
 n_{M,2} & 3 & -1 & -1 & -1 \\
 n_{A,1} & 1 & 0 & 0 & 0 \\
 n_{A,2} & 1 & 0 & 0 & 0 \\
 n_{A,3} & 2 & -1 & -1 & -1 \\
 n_{L,1} & 3 & -1 & -1 & -1 \\
 n_{L,2} & 3 & -1 & -1 & -1 \\
 n_{K,1} & 2 & 0 & -1 & -1 \\
 n_{K,2} & 2 & -1 & -1 & 0 \\
 n_{K,3} & 2 & -1 & 0 & -1 \\
 n_{H,1} & 2 & 0 & -1 & -1 \\
 n_{H,2} & 2 & -1 & -1 & 0 \\
 n_{H,3} & 2 & -1 & 0 & -1
 \end{pmatrix}
 \tag{157}$$

$$\begin{pmatrix}
 \text{SG157} & a_1 & a_2 & a_3 \\
 \nu & 6 & 4 & -2 \\
 n_{\Gamma,1} & 1 & 0 & 0 \\
 n_{\Gamma,2} & 1 & 0 & 0 \\
 n_{\Gamma,3} & 2 & 2 & -1 \\
 n_{M,1} & 3 & 2 & -1 \\
 n_{M,2} & 3 & 2 & -1 \\
 n_{A,1} & 1 & 0 & 0 \\
 n_{A,2} & 1 & 0 & 0 \\
 n_{A,3} & 2 & 2 & -1 \\
 n_{L,1} & 3 & 2 & -1 \\
 n_{L,2} & 3 & 2 & -1 \\
 n_{K,1} & 1 & 1 & 0 \\
 n_{K,2} & 1 & 1 & 0 \\
 n_{K,3} & 2 & 1 & -1 \\
 n_{H,1} & 1 & 1 & 0 \\
 n_{H,2} & 1 & 1 & 0 \\
 n_{H,3} & 2 & 1 & -1
 \end{pmatrix}
 \tag{158}$$

$$\begin{pmatrix} \text{SG158} & a_1 & a_2 & a_3 & a_4 \\ \nu & 12 & 4 & 4 & 4 \\ n_{\Gamma,1} & 2 & 0 & 0 & 0 \\ n_{\Gamma,2} & 2 & 0 & 0 & 0 \\ n_{\Gamma,3} & 4 & 2 & 2 & 2 \\ n_{M,1} & 6 & 2 & 2 & 2 \\ n_{M,2} & 6 & 2 & 2 & 2 \\ n_{A,1} & 1 & 0 & 0 & 0 \\ n_{A,2} & 1 & 0 & 0 & 0 \\ n_{A,3} & 2 & 1 & 1 & 1 \\ n_{L,1} & 3 & 1 & 1 & 1 \\ n_{L,2} & 3 & 1 & 1 & 1 \\ n_{K,1} & 4 & 0 & 2 & 2 \\ n_{K,2} & 4 & 2 & 2 & 0 \\ n_{K,3} & 4 & 2 & 0 & 2 \\ n_{H,1} & 2 & 0 & 1 & 1 \\ n_{H,2} & 2 & 1 & 1 & 0 \\ n_{H,3} & 2 & 1 & 0 & 1 \end{pmatrix} \tag{159}$$

$$\begin{pmatrix} \text{SG159} & a_1 & a_2 & a_3 \\ \nu & 12 & 4 & 4 \\ n_{\Gamma,1} & 2 & 0 & 0 \\ n_{\Gamma,2} & 2 & 0 & 0 \\ n_{\Gamma,3} & 4 & 2 & 2 \\ n_{M,1} & 6 & 2 & 2 \\ n_{M,2} & 6 & 2 & 2 \\ n_{A,1} & 1 & 0 & 0 \\ n_{A,2} & 1 & 0 & 0 \\ n_{A,3} & 2 & 1 & 1 \\ n_{L,1} & 3 & 1 & 1 \\ n_{L,2} & 3 & 1 & 1 \\ n_{K,1} & 2 & 1 & 0 \\ n_{K,2} & 2 & 1 & 0 \\ n_{K,3} & 4 & 1 & 2 \\ n_{H,1} & 2 & 1 & 0 \\ n_{H,2} & 2 & 1 & 0 \\ n_{H,3} & 4 & 1 & 2 \end{pmatrix} \tag{160}$$

$$\begin{pmatrix} \text{SG160} & a_1 & a_2 \\ \nu & 6 & -2 \\ n_{\Gamma,1} & 1 & 0 \\ n_{\Gamma,2} & 1 & 0 \\ n_{\Gamma,3} & 2 & -1 \\ n_{Z,1} & 1 & 0 \\ n_{Z,2} & 1 & 0 \\ n_{Z,3} & 2 & -1 \\ n_{L,1} & 3 & -1 \\ n_{L,2} & 3 & -1 \\ n_{F,1} & 3 & -1 \\ n_{F,2} & 3 & -1 \end{pmatrix} \tag{161}$$

$$\left( \begin{array}{ccc} \text{SG161} & a_1 & a_2 \\ \nu & 12 & 4 \\ n_{\Gamma,1} & 2 & 0 \\ n_{\Gamma,2} & 2 & 0 \\ n_{\Gamma,3} & 4 & 2 \\ n_{Z,1} & 1 & 0 \\ n_{Z,2} & 1 & 0 \\ n_{Z,3} & 2 & 1 \\ n_{L,1} & 3 & 1 \\ n_{L,2} & 3 & 1 \\ n_{F,1} & 6 & 2 \\ n_{F,2} & 6 & 2 \end{array} \right)$$

(162)

$$\left( \begin{array}{ccccccccc} \text{SG162} & a_1 & a_2 & a_3 & a_4 & a_5 & a_6 & a_7 & a_8 & a_9 \\ \nu & 12 & 4 & 6 & 6 & -4 & 0 & 2 & -4 & 8 \\ n_{\Gamma,1} & 1 & 0 & 1 & 1 & 0 & 0 & 0 & 0 & 0 \\ n_{\Gamma,2} & 1 & 0 & 1 & 1 & 0 & 0 & 0 & 0 & 0 \\ n_{\Gamma,3} & 2 & 1 & 2 & 2 & -1 & 0 & 1 & -2 & 4 \\ n_{\Gamma,4} & 1 & 0 & 0 & 0 & 0 & 0 & 0 & 0 & 0 \\ n_{\Gamma,5} & 1 & 0 & 0 & 0 & 0 & 0 & 0 & 0 & 0 \\ n_{\Gamma,6} & 2 & 1 & 0 & 0 & -1 & 0 & 0 & 0 & 0 \\ n_{M,1} & 3 & 1 & 1 & 1 & -1 & 0 & 1 & 0 & 0 \\ n_{M,2} & 3 & 1 & 1 & 1 & -1 & 0 & 1 & 0 & 0 \\ n_{M,3} & 3 & 1 & 2 & 2 & -1 & 0 & 0 & -2 & 4 \\ n_{M,4} & 3 & 1 & 2 & 2 & -1 & 0 & 0 & -2 & 4 \\ n_{A,1} & 1 & 0 & 0 & 1 & 0 & 0 & 0 & 0 & 0 \\ n_{A,2} & 1 & 0 & 0 & 1 & 0 & 0 & 0 & 0 & 0 \\ n_{A,3} & 2 & 1 & 0 & 2 & -1 & 1 & 0 & -2 & 4 \\ n_{A,4} & 1 & 0 & 1 & 0 & 0 & 0 & 0 & 0 & 0 \\ n_{A,5} & 1 & 0 & 1 & 0 & 0 & 0 & 0 & 0 & 0 \\ n_{A,6} & 2 & 1 & 2 & 0 & -1 & -1 & 1 & 0 & 0 \\ n_{L,1} & 3 & 1 & 2 & 1 & -1 & 1 & 0 & 0 & 4 \\ n_{L,2} & 3 & 1 & 2 & 1 & -1 & 1 & 0 & 0 & 4 \\ n_{L,3} & 3 & 1 & 1 & 2 & -1 & -1 & 1 & -2 & 0 \\ n_{L,4} & 3 & 1 & 1 & 2 & -1 & -1 & 1 & -2 & 0 \\ n_{K,1} & 2 & 1 & 1 & 1 & 0 & 0 & 0 & 0 & 0 \\ n_{K,2} & 2 & 1 & 1 & 1 & 0 & 0 & 0 & 0 & 0 \\ n_{K,3} & 4 & 1 & 2 & 2 & -2 & 0 & 1 & -2 & 4 \\ n_{H,1} & 2 & 1 & 1 & 1 & 0 & 0 & 0 & 0 & 0 \\ n_{H,2} & 2 & 1 & 1 & 1 & 0 & 0 & 0 & 0 & 0 \\ n_{H,3} & 4 & 1 & 2 & 2 & -2 & 0 & 1 & -2 & 4 \end{array} \right)$$

(163)

$$\begin{pmatrix}
 \text{SG163} & a_1 & a_2 & a_3 & a_4 & a_5 & a_6 \\
 \nu & 12 & 12 & 4 & 4 & 4 & -16 \\
 n_{\Gamma,1} & 1 & 2 & 0 & 0 & 0 & 0 \\
 n_{\Gamma,2} & 1 & 2 & 0 & 0 & 0 & 0 \\
 n_{\Gamma,3} & 2 & 4 & 1 & 1 & 2 & -8 \\
 n_{\Gamma,4} & 1 & 0 & 0 & 0 & 0 & 0 \\
 n_{\Gamma,5} & 1 & 0 & 0 & 0 & 0 & 0 \\
 n_{\Gamma,6} & 2 & 0 & 1 & 1 & 0 & 0 \\
 n_{M,1} & 3 & 2 & 1 & 1 & 2 & -4 \\
 n_{M,2} & 3 & 2 & 1 & 1 & 2 & -4 \\
 n_{M,3} & 3 & 4 & 1 & 1 & 0 & -4 \\
 n_{M,4} & 3 & 4 & 1 & 1 & 0 & -4 \\
 n_{A,1} & 1 & 1 & 0 & 0 & 0 & 0 \\
 n_{A,2} & 2 & 2 & 1 & 1 & 1 & -4 \\
 n_{A,3} & 2 & 2 & 1 & 1 & 1 & -4 \\
 n_{L,1} & 3 & 3 & 1 & 1 & 1 & -4 \\
 n_{K,1} & 2 & 2 & 1 & 0 & 0 & 0 \\
 n_{K,2} & 2 & 2 & 1 & 0 & 0 & 0 \\
 n_{K,3} & 4 & 4 & 1 & 2 & 2 & -8 \\
 n_{H,1} & 2 & 2 & 1 & 0 & 0 & 0 \\
 n_{H,2} & 2 & 2 & 1 & 0 & 0 & 0 \\
 n_{H,3} & 4 & 4 & 1 & 2 & 2 & -8
 \end{pmatrix}$$

(164)

$$\begin{pmatrix}
 \text{SG164} & a_1 & a_2 & a_3 & a_4 & a_5 & a_6 & a_7 & a_8 & a_9 \\
 \nu & 12 & 6 & 6 & -4 & -4 & 0 & 2 & -4 & 8 \\
 n_{\Gamma,1} & 1 & 1 & 1 & 0 & 0 & 0 & 0 & 0 & 0 \\
 n_{\Gamma,2} & 1 & 1 & 1 & 0 & 0 & 0 & 0 & 0 & 0 \\
 n_{\Gamma,3} & 2 & 2 & 2 & -1 & -1 & 0 & 1 & -2 & 4 \\
 n_{\Gamma,4} & 1 & 0 & 0 & 0 & 0 & 0 & 0 & 0 & 0 \\
 n_{\Gamma,5} & 1 & 0 & 0 & 0 & 0 & 0 & 0 & 0 & 0 \\
 n_{\Gamma,6} & 2 & 0 & 0 & -1 & -1 & 0 & 0 & 0 & 0 \\
 n_{M,1} & 3 & 1 & 1 & -1 & -1 & 0 & 1 & 0 & 0 \\
 n_{M,2} & 3 & 1 & 1 & -1 & -1 & 0 & 1 & 0 & 0 \\
 n_{M,3} & 3 & 2 & 2 & -1 & -1 & 0 & 0 & -2 & 4 \\
 n_{M,4} & 3 & 2 & 2 & -1 & -1 & 0 & 0 & -2 & 4 \\
 n_{A,1} & 1 & 0 & 1 & 0 & 0 & 0 & 0 & 0 & 0 \\
 n_{A,2} & 1 & 0 & 1 & 0 & 0 & 0 & 0 & 0 & 0 \\
 n_{A,3} & 2 & 0 & 2 & -1 & -1 & 1 & 0 & -2 & 4 \\
 n_{A,4} & 1 & 1 & 0 & 0 & 0 & 0 & 0 & 0 & 0 \\
 n_{A,5} & 1 & 1 & 0 & 0 & 0 & 0 & 0 & 0 & 0 \\
 n_{A,6} & 2 & 2 & 0 & -1 & -1 & -1 & 1 & 0 & 0 \\
 n_{L,1} & 3 & 2 & 1 & -1 & -1 & 1 & 0 & 0 & 4 \\
 n_{L,2} & 3 & 2 & 1 & -1 & -1 & 1 & 0 & 0 & 4 \\
 n_{L,3} & 3 & 1 & 2 & -1 & -1 & -1 & 1 & -2 & 0 \\
 n_{L,4} & 3 & 1 & 2 & -1 & -1 & -1 & 1 & -2 & 0 \\
 n_{K,1} & 2 & 1 & 1 & -1 & 0 & 0 & 0 & 0 & 0 \\
 n_{K,2} & 2 & 1 & 1 & -1 & 0 & 0 & 0 & 0 & 0 \\
 n_{K,3} & 4 & 2 & 2 & -1 & -2 & 0 & 1 & -2 & 4 \\
 n_{H,1} & 2 & 1 & 1 & -1 & 0 & 0 & 0 & 0 & 0 \\
 n_{H,2} & 2 & 1 & 1 & -1 & 0 & 0 & 0 & 0 & 0 \\
 n_{H,3} & 4 & 2 & 2 & -1 & -2 & 0 & 1 & -2 & 4
 \end{pmatrix}$$

(165)

$$\begin{pmatrix}
 \text{SG165} & a_1 & a_2 & a_3 & a_4 & a_5 & a_6 \\
 \nu & 12 & 12 & 8 & 4 & 4 & -16 \\
 n_{\Gamma,1} & 1 & 2 & 0 & 0 & 0 & 0 \\
 n_{\Gamma,2} & 1 & 2 & 0 & 0 & 0 & 0 \\
 n_{\Gamma,3} & 2 & 4 & 2 & 1 & 2 & -8 \\
 n_{\Gamma,4} & 1 & 0 & 0 & 0 & 0 & 0 \\
 n_{\Gamma,5} & 1 & 0 & 0 & 0 & 0 & 0 \\
 n_{\Gamma,6} & 2 & 0 & 2 & 1 & 0 & 0 \\
 n_{M,1} & 3 & 2 & 2 & 1 & 2 & -4 \\
 n_{M,2} & 3 & 2 & 2 & 1 & 2 & -4 \\
 n_{M,3} & 3 & 4 & 2 & 1 & 0 & -4 \\
 n_{M,4} & 3 & 4 & 2 & 1 & 0 & -4 \\
 n_{A,1} & 1 & 1 & 0 & 0 & 0 & 0 \\
 n_{A,2} & 2 & 2 & 2 & 1 & 1 & -4 \\
 n_{A,3} & 2 & 2 & 2 & 1 & 1 & -4 \\
 n_{L,1} & 3 & 3 & 2 & 1 & 1 & -4 \\
 n_{K,1} & 2 & 2 & 2 & 0 & 0 & 0 \\
 n_{K,2} & 2 & 2 & 2 & 0 & 0 & 0 \\
 n_{K,3} & 4 & 4 & 2 & 2 & 2 & -8 \\
 n_{H,1} & 1 & 1 & 1 & 0 & 0 & 0 \\
 n_{H,2} & 1 & 1 & 1 & 0 & 0 & 0 \\
 n_{H,3} & 2 & 2 & 1 & 1 & 1 & -4
 \end{pmatrix}$$

(166)

$$\begin{pmatrix}
 \text{SG166} & a_1 & a_2 & a_3 & a_4 & a_5 & a_6 & a_7 & a_8 \\
 \nu & 12 & 6 & 6 & -4 & 0 & 2 & -4 & 8 \\
 n_{\Gamma,1} & 1 & 1 & 1 & 0 & 0 & 0 & 0 & 0 \\
 n_{\Gamma,2} & 1 & 1 & 1 & 0 & 0 & 0 & 0 & 0 \\
 n_{\Gamma,3} & 2 & 2 & 2 & -1 & 0 & 1 & -2 & 4 \\
 n_{\Gamma,4} & 1 & 0 & 0 & 0 & 0 & 0 & 0 & 0 \\
 n_{\Gamma,5} & 1 & 0 & 0 & 0 & 0 & 0 & 0 & 0 \\
 n_{\Gamma,6} & 2 & 0 & 0 & -1 & 0 & 0 & 0 & 0 \\
 n_{Z,1} & 1 & 1 & 0 & 0 & 0 & 0 & 0 & 0 \\
 n_{Z,2} & 1 & 1 & 0 & 0 & 0 & 0 & 0 & 0 \\
 n_{Z,3} & 2 & 2 & 0 & -1 & 1 & 0 & -2 & 4 \\
 n_{Z,4} & 1 & 0 & 1 & 0 & 0 & 0 & 0 & 0 \\
 n_{Z,5} & 1 & 0 & 1 & 0 & 0 & 0 & 0 & 0 \\
 n_{Z,6} & 2 & 0 & 2 & -1 & -1 & 1 & 0 & 0 \\
 n_{L,1} & 3 & 1 & 2 & -1 & 1 & 0 & 0 & 4 \\
 n_{L,2} & 3 & 1 & 2 & -1 & 1 & 0 & 0 & 4 \\
 n_{L,3} & 3 & 2 & 1 & -1 & -1 & 1 & -2 & 0 \\
 n_{L,4} & 3 & 2 & 1 & -1 & -1 & 1 & -2 & 0 \\
 n_{F,1} & 3 & 1 & 1 & -1 & 0 & 1 & 0 & 0 \\
 n_{F,2} & 3 & 1 & 1 & -1 & 0 & 1 & 0 & 0 \\
 n_{F,3} & 3 & 2 & 2 & -1 & 0 & 0 & -2 & 4 \\
 n_{F,4} & 3 & 2 & 2 & -1 & 0 & 0 & -2 & 4
 \end{pmatrix}$$

(167)



$$\begin{pmatrix}
 \text{SG167} & a_1 & a_2 & a_3 & a_4 & a_5 \\
 \nu & 12 & 12 & 4 & 4 & -16 \\
 n_{\Gamma,1} & 1 & 2 & 0 & 0 & 0 \\
 n_{\Gamma,2} & 1 & 2 & 0 & 0 & 0 \\
 n_{\Gamma,3} & 2 & 4 & 1 & 2 & -8 \\
 n_{\Gamma,4} & 1 & 0 & 0 & 0 & 0 \\
 n_{\Gamma,5} & 1 & 0 & 0 & 0 & 0 \\
 n_{\Gamma,6} & 2 & 0 & 1 & 0 & 0 \\
 n_{Z,1} & 1 & 1 & 0 & 0 & 0 \\
 n_{Z,2} & 2 & 2 & 1 & 1 & -4 \\
 n_{Z,3} & 2 & 2 & 1 & 1 & -4 \\
 n_{L,1} & 3 & 3 & 1 & 1 & -4 \\
 n_{F,1} & 3 & 2 & 1 & 2 & -4 \\
 n_{F,2} & 3 & 2 & 1 & 2 & -4 \\
 n_{F,3} & 3 & 4 & 1 & 0 & -4 \\
 n_{F,4} & 3 & 4 & 1 & 0 & -4
 \end{pmatrix} \tag{168}$$

$$\begin{pmatrix}
 \text{SG168} & a_1 & a_2 & a_3 & a_4 \\
 \nu & 6 & 4 & 2 & 2 \\
 n_{\Gamma,1} & 1 & 1 & 1 & 0 \\
 n_{\Gamma,2} & 1 & 0 & 0 & 1 \\
 n_{\Gamma,3} & 1 & 1 & 0 & 0 \\
 n_{\Gamma,4} & 1 & 1 & 0 & 0 \\
 n_{\Gamma,5} & 1 & 0 & 0 & 1 \\
 n_{\Gamma,6} & 1 & 1 & 1 & 0 \\
 n_{M,1} & 3 & 2 & 1 & 1 \\
 n_{M,2} & 3 & 2 & 1 & 1 \\
 n_{A,1} & 1 & 1 & 1 & 0 \\
 n_{A,2} & 1 & 0 & 0 & 1 \\
 n_{A,3} & 1 & 1 & 0 & 0 \\
 n_{A,4} & 1 & 1 & 0 & 0 \\
 n_{A,5} & 1 & 0 & 0 & 1 \\
 n_{A,6} & 1 & 1 & 1 & 0 \\
 n_{L,1} & 3 & 2 & 1 & 1 \\
 n_{L,2} & 3 & 2 & 1 & 1 \\
 n_{K,1} & 2 & 1 & 1 & 0 \\
 n_{K,2} & 2 & 2 & 0 & 2 \\
 n_{K,3} & 2 & 1 & 1 & 0 \\
 n_{H,1} & 2 & 1 & 1 & 0 \\
 n_{H,2} & 2 & 2 & 0 & 2 \\
 n_{H,3} & 2 & 1 & 1 & 0
 \end{pmatrix} \tag{169}$$

$$\begin{pmatrix} \text{SG169} & a_1 \\ \nu & 12 \\ n_{\Gamma,1} & 2 \\ n_{\Gamma,2} & 2 \\ n_{\Gamma,3} & 2 \\ n_{\Gamma,4} & 2 \\ n_{\Gamma,5} & 2 \\ n_{\Gamma,6} & 2 \\ n_{M,1} & 6 \\ n_{M,2} & 6 \\ n_{A,1} & 1 \\ n_{A,2} & 2 \\ n_{A,3} & 2 \\ n_{A,4} & 1 \\ n_{A,5} & 2 \\ n_{A,6} & 2 \\ n_{L,1} & 3 \\ n_{L,2} & 3 \\ n_{K,1} & 4 \\ n_{K,2} & 4 \\ n_{K,3} & 4 \\ n_{H,1} & 4 \\ n_{H,2} & 2 \\ n_{H,3} & 4 \end{pmatrix} \tag{170}$$

$$\begin{pmatrix} \text{SG170} & a_1 \\ \nu & 12 \\ n_{\Gamma,1} & 2 \\ n_{\Gamma,2} & 2 \\ n_{\Gamma,3} & 2 \\ n_{\Gamma,4} & 2 \\ n_{\Gamma,5} & 2 \\ n_{\Gamma,6} & 2 \\ n_{M,1} & 6 \\ n_{M,2} & 6 \\ n_{A,1} & 1 \\ n_{A,2} & 2 \\ n_{A,3} & 2 \\ n_{A,4} & 1 \\ n_{A,5} & 2 \\ n_{A,6} & 2 \\ n_{L,1} & 3 \\ n_{L,2} & 3 \\ n_{K,1} & 4 \\ n_{K,2} & 4 \\ n_{K,3} & 4 \\ n_{H,1} & 4 \\ n_{H,2} & 2 \\ n_{H,3} & 4 \end{pmatrix} \tag{171}$$

$$\begin{pmatrix} \text{SG171} & a_1 \\ \nu & 6 \\ n_{\Gamma,1} & 1 \\ n_{\Gamma,2} & 1 \\ n_{\Gamma,3} & 1 \\ n_{\Gamma,4} & 1 \\ n_{\Gamma,5} & 1 \\ n_{\Gamma,6} & 1 \\ n_{M,1} & 3 \\ n_{M,2} & 3 \\ n_{A,1} & 1 \\ n_{A,2} & 1 \\ n_{A,3} & 1 \\ n_{A,4} & 1 \\ n_{A,5} & 1 \\ n_{A,6} & 1 \\ n_{L,1} & 3 \\ n_{L,2} & 3 \\ n_{K,1} & 2 \\ n_{K,2} & 2 \\ n_{K,3} & 2 \\ n_{H,1} & 2 \\ n_{H,2} & 2 \\ n_{H,3} & 2 \end{pmatrix} \tag{172}$$

$$\begin{pmatrix} \text{SG172} & a_1 \\ \nu & 6 \\ n_{\Gamma,1} & 1 \\ n_{\Gamma,2} & 1 \\ n_{\Gamma,3} & 1 \\ n_{\Gamma,4} & 1 \\ n_{\Gamma,5} & 1 \\ n_{\Gamma,6} & 1 \\ n_{M,1} & 3 \\ n_{M,2} & 3 \\ n_{A,1} & 1 \\ n_{A,2} & 1 \\ n_{A,3} & 1 \\ n_{A,4} & 1 \\ n_{A,5} & 1 \\ n_{A,6} & 1 \\ n_{L,1} & 3 \\ n_{L,2} & 3 \\ n_{K,1} & 2 \\ n_{K,2} & 2 \\ n_{K,3} & 2 \\ n_{H,1} & 2 \\ n_{H,2} & 2 \\ n_{H,3} & 2 \end{pmatrix} \tag{173}$$

$$\left( \begin{array}{c} \text{SG173} \\ \nu \\ n_{\Gamma,1} \\ n_{\Gamma,2} \\ n_{\Gamma,3} \\ n_{\Gamma,4} \\ n_{\Gamma,5} \\ n_{\Gamma,6} \\ n_{M,1} \\ n_{M,2} \\ n_{A,1} \\ n_{A,2} \\ n_{A,3} \\ n_{A,4} \\ n_{A,5} \\ n_{A,6} \\ n_{L,1} \\ n_{L,2} \\ n_{K,1} \\ n_{K,2} \\ n_{K,3} \\ n_{H,1} \\ n_{H,2} \\ n_{H,3} \end{array} \begin{array}{ccc} a_1 & a_2 & a_3 \\ 12 & 4 & 4 \\ 2 & 1 & 1 \\ 2 & 0 & 0 \\ 2 & 1 & 1 \\ 2 & 1 & 1 \\ 2 & 0 & 0 \\ 2 & 1 & 1 \\ 6 & 2 & 2 \\ 6 & 2 & 2 \\ 1 & 0 & 0 \\ 2 & 1 & 1 \\ 2 & 1 & 1 \\ 1 & 0 & 0 \\ 2 & 1 & 1 \\ 2 & 1 & 1 \\ 3 & 1 & 1 \\ 3 & 1 & 1 \\ 4 & 1 & 2 \\ 4 & 2 & 0 \\ 4 & 1 & 2 \\ 4 & 1 & 2 \\ 2 & 1 & 0 \\ 4 & 1 & 2 \end{array} \right)$$

(174)

$$\left( \begin{array}{c} \text{SG174} \\ \nu \\ n_{\Gamma,1} \\ n_{\Gamma,2} \\ n_{\Gamma,3} \\ n_{\Gamma,4} \\ n_{\Gamma,5} \\ n_{\Gamma,6} \\ n_{M,1} \\ n_{M,2} \\ n_{A,1} \\ n_{A,2} \\ n_{A,3} \\ n_{A,4} \\ n_{A,5} \\ n_{A,6} \\ n_{L,1} \\ n_{L,2} \\ n_{K,1} \\ n_{K,2} \\ n_{K,3} \\ n_{K,4} \\ n_{K,5} \\ n_{K,6} \\ n_{H,1} \\ n_{H,2} \\ n_{H,3} \\ n_{H,4} \\ n_{H,5} \\ n_{H,6} \end{array} \begin{array}{cccccccccccc} a_1 & a_2 & a_3 & a_4 & a_5 & a_6 & a_7 & a_8 & a_9 & a_{10} \\ 6 & 4 & 4 & 4 & 2 & 2 & 2 & 2 & -30 & -30 \\ 1 & 1 & 1 & 1 & 1 & 1 & 1 & 1 & -9 & -9 \\ 1 & 0 & 0 & 0 & 0 & 0 & 0 & 0 & 0 & 0 \\ 1 & 1 & 1 & 1 & 0 & 0 & 0 & 0 & -6 & -6 \\ 1 & 1 & 1 & 1 & 0 & 0 & 0 & 0 & -6 & -6 \\ 1 & 0 & 0 & 0 & 0 & 0 & 0 & 0 & 0 & 0 \\ 1 & 1 & 1 & 1 & 1 & 1 & 1 & 1 & -9 & -9 \\ 3 & 2 & 2 & 2 & 1 & 1 & 1 & 1 & -15 & -15 \\ 3 & 2 & 2 & 2 & 1 & 1 & 1 & 1 & -15 & -15 \\ 1 & 1 & 1 & 1 & 0 & 1 & 0 & 1 & -6 & -9 \\ 1 & 0 & 0 & 0 & 0 & 0 & 0 & 0 & 0 & 0 \\ 1 & 1 & 1 & 1 & 1 & 0 & 1 & 0 & -9 & -6 \\ 1 & 1 & 1 & 1 & 1 & 0 & 1 & 0 & -9 & -6 \\ 1 & 0 & 0 & 0 & 0 & 0 & 0 & 0 & 0 & 0 \\ 1 & 1 & 1 & 1 & 0 & 1 & 0 & 1 & -6 & -9 \\ 3 & 2 & 2 & 2 & 1 & 1 & 1 & 1 & -15 & -15 \\ 3 & 2 & 2 & 2 & 1 & 1 & 1 & 1 & -15 & -15 \\ 1 & 1 & 0 & 1 & 0 & 0 & 0 & 0 & -3 & -3 \\ 1 & 1 & 1 & 0 & 0 & 0 & 1 & 1 & -6 & -6 \\ 1 & 0 & 1 & 1 & 0 & 0 & 1 & 1 & -6 & -6 \\ 1 & 1 & 0 & 1 & 1 & 1 & 0 & 0 & -6 & -6 \\ 1 & 1 & 1 & 0 & 1 & 1 & 0 & 0 & -6 & -6 \\ 1 & 0 & 1 & 1 & 0 & 0 & 0 & 0 & -3 & -3 \\ 1 & 1 & 0 & 1 & 1 & 0 & 0 & 0 & -6 & -3 \\ 1 & 1 & 1 & 0 & 1 & 0 & 0 & 1 & -6 & -6 \\ 1 & 0 & 1 & 1 & 0 & 0 & 0 & 1 & -3 & -6 \\ 1 & 1 & 0 & 1 & 0 & 1 & 0 & 0 & -3 & -6 \\ 1 & 1 & 1 & 0 & 0 & 1 & 1 & 0 & -6 & -6 \\ 1 & 0 & 1 & 1 & 0 & 0 & 1 & 0 & -6 & -3 \end{array} \right)$$

(175)

| SG175           | $a_1$ | $a_2$ | $a_3$ | $a_4$ | $a_5$ | $a_6$ | $a_7$ | $a_8$ | $a_9$ | $a_{10}$ | $a_{11}$ | $a_{12}$ | $a_{13}$ | $a_{14}$ |
|-----------------|-------|-------|-------|-------|-------|-------|-------|-------|-------|----------|----------|----------|----------|----------|
| $\nu$           | 12    | 8     | 6     | 6     | 4     | 4     | 4     | 4     | 2     | 2        | -236     | 2        | 228      | -144     |
| $n_{\Gamma,1}$  | 1     | 1     | 1     | 1     | 1     | 0     | 1     | 1     | 1     | 0        | -47      | 1        | 42       | -36      |
| $n_{\Gamma,2}$  | 1     | 0     | 1     | 1     | 0     | 1     | 0     | 0     | 0     | 1        | -23      | 0        | 24       | -12      |
| $n_{\Gamma,3}$  | 1     | 1     | 1     | 1     | 0     | 0     | 0     | 0     | 0     | 0        | -18      | 0        | 18       | -12      |
| $n_{\Gamma,4}$  | 1     | 1     | 1     | 1     | 0     | 0     | 0     | 0     | 0     | 0        | -18      | 0        | 18       | -12      |
| $n_{\Gamma,5}$  | 1     | 0     | 1     | 1     | 0     | 1     | 0     | 0     | 0     | 1        | -23      | 0        | 24       | -12      |
| $n_{\Gamma,6}$  | 1     | 1     | 1     | 1     | 1     | 0     | 1     | 1     | 1     | 0        | -47      | 1        | 42       | -36      |
| $n_{\Gamma,7}$  | 1     | 1     | 0     | 0     | 1     | 0     | 0     | 0     | 0     | 0        | -6       | 0        | 6        | 0        |
| $n_{\Gamma,8}$  | 1     | 0     | 0     | 0     | 0     | 1     | 0     | 0     | 0     | 0        | -6       | 0        | 6        | 0        |
| $n_{\Gamma,9}$  | 1     | 1     | 0     | 0     | 0     | 0     | 1     | 1     | 0     | 0        | -18      | 0        | 18       | -12      |
| $n_{\Gamma,10}$ | 1     | 1     | 0     | 0     | 0     | 0     | 1     | 1     | 0     | 0        | -18      | 0        | 18       | -12      |
| $n_{\Gamma,11}$ | 1     | 0     | 0     | 0     | 0     | 1     | 0     | 0     | 0     | 0        | -6       | 0        | 6        | 0        |
| $n_{\Gamma,12}$ | 1     | 1     | 0     | 0     | 1     | 0     | 0     | 0     | 0     | 0        | -6       | 0        | 6        | 0        |
| $n_{M,1}$       | 3     | 2     | 1     | 1     | 1     | 1     | 1     | 1     | 1     | 1        | -58      | 1        | 54       | -36      |
| $n_{M,2}$       | 3     | 2     | 1     | 1     | 1     | 1     | 1     | 1     | 1     | 1        | -58      | 1        | 54       | -36      |
| $n_{M,3}$       | 3     | 2     | 2     | 2     | 1     | 1     | 1     | 1     | 0     | 0        | -60      | 0        | 60       | -36      |
| $n_{M,4}$       | 3     | 2     | 2     | 2     | 1     | 1     | 1     | 1     | 0     | 0        | -60      | 0        | 60       | -36      |
| $n_{A,1}$       | 1     | 1     | 0     | 1     | 1     | 0     | 0     | 1     | 0     | 0        | -29      | 1        | 24       | -24      |
| $n_{A,2}$       | 1     | 0     | 0     | 1     | 0     | 1     | 0     | 0     | 0     | 0        | -17      | 0        | 18       | -12      |
| $n_{A,3}$       | 1     | 1     | 0     | 1     | 0     | 0     | 1     | 0     | 0     | 0        | -18      | 0        | 18       | -12      |
| $n_{A,4}$       | 1     | 1     | 0     | 1     | 0     | 0     | 1     | 0     | 0     | 0        | -18      | 0        | 18       | -12      |
| $n_{A,5}$       | 1     | 0     | 0     | 1     | 0     | 1     | 0     | 0     | 0     | 0        | -17      | 0        | 18       | -12      |
| $n_{A,6}$       | 1     | 1     | 0     | 1     | 1     | 0     | 0     | 1     | 0     | 0        | -29      | 1        | 24       | -24      |
| $n_{A,7}$       | 1     | 1     | 1     | 0     | 1     | 0     | 1     | 0     | 1     | 0        | -24      | 0        | 24       | -12      |
| $n_{A,8}$       | 1     | 0     | 1     | 0     | 0     | 1     | 0     | 0     | 0     | 1        | -12      | 0        | 12       | 0        |
| $n_{A,9}$       | 1     | 1     | 1     | 0     | 0     | 0     | 0     | 1     | 0     | 0        | -18      | 0        | 18       | -12      |
| $n_{A,10}$      | 1     | 1     | 1     | 0     | 0     | 0     | 0     | 1     | 0     | 0        | -18      | 0        | 18       | -12      |
| $n_{A,11}$      | 1     | 0     | 1     | 0     | 0     | 1     | 0     | 0     | 0     | 1        | -12      | 0        | 12       | 0        |
| $n_{A,12}$      | 1     | 1     | 1     | 0     | 1     | 0     | 1     | 0     | 1     | 0        | -24      | 0        | 24       | -12      |
| $n_{L,1}$       | 3     | 2     | 2     | 1     | 1     | 1     | 1     | 1     | 0     | 0        | -58      | 1        | 54       | -36      |
| $n_{L,2}$       | 3     | 2     | 2     | 1     | 1     | 1     | 1     | 1     | 0     | 0        | -58      | 1        | 54       | -36      |
| $n_{L,3}$       | 3     | 2     | 1     | 2     | 1     | 1     | 1     | 1     | 1     | 1        | -60      | 0        | 60       | -36      |
| $n_{L,4}$       | 3     | 2     | 1     | 2     | 1     | 1     | 1     | 1     | 1     | 1        | -60      | 0        | 60       | -36      |
| $n_{K,1}$       | 2     | 1     | 1     | 1     | 1     | 0     | 0     | 0     | 1     | 0        | -35      | 1        | 30       | -24      |
| $n_{K,2}$       | 2     | 2     | 1     | 1     | 0     | 2     | 1     | 1     | 0     | 1        | -47      | 0        | 48       | -24      |
| $n_{K,3}$       | 2     | 1     | 1     | 1     | 1     | 0     | 1     | 1     | 0     | 0        | -36      | 0        | 36       | -24      |
| $n_{K,4}$       | 2     | 1     | 1     | 1     | 1     | 0     | 1     | 1     | 0     | 0        | -36      | 0        | 36       | -24      |
| $n_{K,5}$       | 2     | 2     | 1     | 1     | 0     | 2     | 1     | 1     | 0     | 1        | -47      | 0        | 48       | -24      |
| $n_{K,6}$       | 2     | 1     | 1     | 1     | 1     | 0     | 0     | 0     | 1     | 0        | -35      | 1        | 30       | -24      |
| $n_{H,1}$       | 2     | 1     | 1     | 1     | 1     | 0     | 1     | 0     | 0     | 0        | -35      | 1        | 30       | -24      |
| $n_{H,2}$       | 2     | 2     | 1     | 1     | 0     | 2     | 1     | 1     | 0     | 1        | -47      | 0        | 48       | -24      |
| $n_{H,3}$       | 2     | 1     | 1     | 1     | 1     | 0     | 0     | 1     | 1     | 0        | -36      | 0        | 36       | -24      |
| $n_{H,4}$       | 2     | 1     | 1     | 1     | 1     | 0     | 0     | 1     | 1     | 0        | -36      | 0        | 36       | -24      |
| $n_{H,5}$       | 2     | 2     | 1     | 1     | 0     | 2     | 1     | 1     | 0     | 1        | -47      | 0        | 48       | -24      |
| $n_{H,6}$       | 2     | 1     | 1     | 1     | 1     | 0     | 1     | 0     | 0     | 0        | -35      | 1        | 30       | -24      |

(176)

$$\left( \begin{array}{c|cccccccc}
 \text{SG176} & a_1 & a_2 & a_3 & a_4 & a_5 & a_6 & a_7 & a_8 & a_9 \\
 \nu & 12 & 12 & 8 & 8 & 4 & 4 & 4 & -52 & 432 \\
 n_{\Gamma,1} & 1 & 2 & 1 & 1 & 1 & 1 & 1 & -10 & 84 \\
 n_{\Gamma,2} & 1 & 2 & 0 & 0 & 0 & 0 & 0 & 0 & 0 \\
 n_{\Gamma,3} & 1 & 2 & 1 & 1 & 0 & 0 & 1 & -7 & 60 \\
 n_{\Gamma,4} & 1 & 2 & 1 & 1 & 0 & 0 & 1 & -7 & 60 \\
 n_{\Gamma,5} & 1 & 2 & 0 & 0 & 0 & 0 & 0 & 0 & 0 \\
 n_{\Gamma,6} & 1 & 2 & 1 & 1 & 1 & 1 & 1 & -10 & 84 \\
 n_{\Gamma,7} & 1 & 0 & 1 & 1 & 0 & 0 & 0 & -3 & 24 \\
 n_{\Gamma,8} & 1 & 0 & 0 & 0 & 0 & 0 & 0 & 0 & 0 \\
 n_{\Gamma,9} & 1 & 0 & 1 & 1 & 1 & 1 & 0 & -6 & 48 \\
 n_{\Gamma,10} & 1 & 0 & 1 & 1 & 1 & 1 & 0 & -6 & 48 \\
 n_{\Gamma,11} & 1 & 0 & 0 & 0 & 0 & 0 & 0 & 0 & 0 \\
 n_{\Gamma,12} & 1 & 0 & 1 & 1 & 0 & 0 & 0 & -3 & 24 \\
 n_{M,1} & 3 & 2 & 2 & 2 & 1 & 1 & 2 & -13 & 108 \\
 n_{M,2} & 3 & 2 & 2 & 2 & 1 & 1 & 2 & -13 & 108 \\
 n_{M,3} & 3 & 4 & 2 & 2 & 1 & 1 & 0 & -13 & 108 \\
 n_{M,4} & 3 & 4 & 2 & 2 & 1 & 1 & 0 & -13 & 108 \\
 n_{A,1} & 2 & 2 & 2 & 2 & 1 & 1 & 1 & -13 & 108 \\
 n_{A,2} & 1 & 1 & 0 & 0 & 0 & 0 & 0 & 0 & 0 \\
 n_{A,3} & 2 & 2 & 2 & 2 & 1 & 1 & 1 & -13 & 108 \\
 n_{L,1} & 3 & 3 & 2 & 2 & 1 & 1 & 1 & -13 & 108 \\
 n_{K,1} & 2 & 2 & 1 & 2 & 0 & 0 & 1 & -7 & 60 \\
 n_{K,2} & 2 & 2 & 2 & 0 & 1 & 1 & 0 & -6 & 48 \\
 n_{K,3} & 2 & 2 & 1 & 2 & 1 & 1 & 1 & -13 & 108 \\
 n_{K,4} & 2 & 2 & 1 & 2 & 1 & 1 & 1 & -13 & 108 \\
 n_{K,5} & 2 & 2 & 2 & 0 & 1 & 1 & 0 & -6 & 48 \\
 n_{K,6} & 2 & 2 & 1 & 2 & 0 & 0 & 1 & -7 & 60 \\
 n_{H,1} & 2 & 2 & 1 & 2 & 0 & 1 & 1 & -10 & 84 \\
 n_{H,2} & 1 & 1 & 1 & 0 & 0 & 1 & 0 & -3 & 24 \\
 n_{H,3} & 2 & 2 & 1 & 2 & 0 & 1 & 1 & -10 & 84 \\
 n_{H,4} & 2 & 2 & 1 & 2 & 1 & 0 & 1 & -10 & 84 \\
 n_{H,5} & 1 & 1 & 1 & 0 & 1 & 0 & 0 & -3 & 24 \\
 n_{H,6} & 2 & 2 & 1 & 2 & 1 & 0 & 1 & -10 & 84
 \end{array} \right) \tag{177}$$

$$\left( \begin{array}{c|cccc}
 \text{SG177} & a_1 & a_2 & a_3 & a_4 \\
 \nu & 6 & 4 & 2 & 2 \\
 n_{\Gamma,1} & 1 & 0 & 0 & 1 \\
 n_{\Gamma,2} & 1 & 1 & 1 & 0 \\
 n_{\Gamma,3} & 1 & 1 & 0 & 0 \\
 n_{M,1} & 3 & 2 & 1 & 1 \\
 n_{A,1} & 1 & 0 & 0 & 1 \\
 n_{A,2} & 1 & 1 & 1 & 0 \\
 n_{A,3} & 1 & 1 & 0 & 0 \\
 n_{L,1} & 3 & 2 & 1 & 1 \\
 n_{K,1} & 1 & 1 & 0 & 1 \\
 n_{K,2} & 1 & 1 & 0 & 1 \\
 n_{K,3} & 2 & 1 & 1 & 0 \\
 n_{H,1} & 1 & 1 & 0 & 1 \\
 n_{H,2} & 1 & 1 & 0 & 1 \\
 n_{H,3} & 2 & 1 & 1 & 0
 \end{array} \right) \tag{178}$$

$$\begin{pmatrix} \text{SG178} & a_1 \\ \nu & 12 \\ n_{\Gamma,1} & 2 \\ n_{\Gamma,2} & 2 \\ n_{\Gamma,3} & 2 \\ n_{M,1} & 6 \\ n_{A,1} & 1 \\ n_{A,2} & 1 \\ n_{A,3} & 1 \\ n_{A,4} & 1 \\ n_{A,5} & 1 \\ n_{A,6} & 2 \\ n_{L,1} & 3 \\ n_{L,2} & 3 \\ n_{L,3} & 3 \\ n_{L,4} & 3 \\ n_{K,1} & 2 \\ n_{K,2} & 2 \\ n_{K,3} & 4 \\ n_{H,1} & 2 \\ n_{H,2} & 2 \\ n_{H,3} & 4 \end{pmatrix} \tag{179}$$

$$\begin{pmatrix} \text{SG179} & a_1 \\ \nu & 12 \\ n_{\Gamma,1} & 2 \\ n_{\Gamma,2} & 2 \\ n_{\Gamma,3} & 2 \\ n_{M,1} & 6 \\ n_{A,1} & 1 \\ n_{A,2} & 1 \\ n_{A,3} & 1 \\ n_{A,4} & 1 \\ n_{A,5} & 1 \\ n_{A,6} & 2 \\ n_{L,1} & 3 \\ n_{L,2} & 3 \\ n_{L,3} & 3 \\ n_{L,4} & 3 \\ n_{K,1} & 2 \\ n_{K,2} & 2 \\ n_{K,3} & 4 \\ n_{H,1} & 2 \\ n_{H,2} & 2 \\ n_{H,3} & 4 \end{pmatrix} \tag{180}$$

$$\begin{array}{cc}
 \text{SG180} & a_1 \\
 \nu & 6 \\
 n_{\Gamma,1} & 1 \\
 n_{\Gamma,2} & 1 \\
 n_{\Gamma,3} & 1 \\
 n_{M,1} & 3 \\
 n_{A,1} & 1 \\
 n_{A,2} & 1 \\
 n_{A,3} & 1 \\
 n_{L,1} & 3 \\
 n_{K,1} & 1 \\
 n_{K,2} & 1 \\
 n_{K,3} & 2 \\
 n_{H,1} & 1 \\
 n_{H,2} & 1 \\
 n_{H,3} & 2
 \end{array}
 \tag{181}$$

$$\begin{array}{cc}
 \text{SG181} & a_1 \\
 \nu & 6 \\
 n_{\Gamma,1} & 1 \\
 n_{\Gamma,2} & 1 \\
 n_{\Gamma,3} & 1 \\
 n_{M,1} & 3 \\
 n_{A,1} & 1 \\
 n_{A,2} & 1 \\
 n_{A,3} & 1 \\
 n_{L,1} & 3 \\
 n_{K,1} & 1 \\
 n_{K,2} & 1 \\
 n_{K,3} & 2 \\
 n_{H,1} & 1 \\
 n_{H,2} & 1 \\
 n_{H,3} & 2
 \end{array}
 \tag{182}$$



$$\begin{pmatrix} \text{SG182} & a_1 & a_2 & a_3 \\ \nu & 12 & 4 & 4 \\ n_{\Gamma,1} & 2 & 0 & 0 \\ n_{\Gamma,2} & 2 & 1 & 1 \\ n_{\Gamma,3} & 2 & 1 & 1 \\ n_{M,1} & 6 & 2 & 2 \\ n_{A,1} & 1 & 0 & 0 \\ n_{A,2} & 1 & 0 & 0 \\ n_{A,3} & 1 & 0 & 0 \\ n_{A,4} & 1 & 0 & 0 \\ n_{A,5} & 2 & 1 & 1 \\ n_{A,6} & 2 & 1 & 1 \\ n_{L,1} & 3 & 1 & 1 \\ n_{L,2} & 3 & 1 & 1 \\ n_{L,3} & 3 & 1 & 1 \\ n_{L,4} & 3 & 1 & 1 \\ n_{K,1} & 2 & 1 & 0 \\ n_{K,2} & 2 & 1 & 0 \\ n_{K,3} & 4 & 1 & 2 \\ n_{H,1} & 2 & 1 & 0 \\ n_{H,2} & 2 & 1 & 0 \\ n_{H,3} & 4 & 1 & 2 \end{pmatrix} \tag{183}$$

$$\begin{pmatrix} \text{SG183} & a_1 & a_2 & a_3 & a_4 \\ \nu & 6 & 2 & 2 & 2 \\ n_{\Gamma,1} & 1 & 1 & 1 & 0 \\ n_{\Gamma,2} & 1 & 0 & 0 & 1 \\ n_{\Gamma,3} & 1 & 0 & 0 & 0 \\ n_{M,1} & 3 & 1 & 1 & 1 \\ n_{A,1} & 1 & 1 & 1 & 0 \\ n_{A,2} & 1 & 0 & 0 & 1 \\ n_{A,3} & 1 & 0 & 0 & 0 \\ n_{L,1} & 3 & 1 & 1 & 1 \\ n_{K,1} & 1 & 0 & 1 & 0 \\ n_{K,2} & 1 & 0 & 1 & 0 \\ n_{K,3} & 2 & 1 & 0 & 1 \\ n_{H,1} & 1 & 0 & 1 & 0 \\ n_{H,2} & 1 & 0 & 1 & 0 \\ n_{H,3} & 2 & 1 & 0 & 1 \end{pmatrix} \tag{184}$$

$$\begin{pmatrix}
 \text{SG184} & a_1 & a_2 & a_3 & a_4 \\
 \nu & 12 & 8 & 4 & 4 \\
 n_{\Gamma,1} & 2 & 0 & 0 & 2 \\
 n_{\Gamma,2} & 2 & 2 & 2 & 0 \\
 n_{\Gamma,3} & 2 & 2 & 0 & 0 \\
 n_{M,1} & 6 & 4 & 2 & 2 \\
 n_{A,1} & 1 & 1 & 1 & 0 \\
 n_{A,2} & 1 & 1 & 0 & 0 \\
 n_{A,3} & 1 & 0 & 0 & 1 \\
 n_{L,1} & 3 & 2 & 1 & 1 \\
 n_{K,1} & 2 & 2 & 0 & 2 \\
 n_{K,2} & 2 & 2 & 0 & 2 \\
 n_{K,3} & 4 & 2 & 2 & 0 \\
 n_{H,1} & 2 & 2 & 0 & 2 \\
 n_{H,2} & 2 & 2 & 0 & 2 \\
 n_{H,3} & 2 & 1 & 1 & 0
 \end{pmatrix} \tag{185}$$

$$\begin{pmatrix}
 \text{SG185} & a_1 & a_2 & a_3 \\
 \nu & 12 & 8 & -4 \\
 n_{\Gamma,1} & 2 & 0 & 0 \\
 n_{\Gamma,2} & 2 & 2 & -1 \\
 n_{\Gamma,3} & 2 & 2 & -1 \\
 n_{M,1} & 6 & 4 & -2 \\
 n_{A,1} & 1 & 0 & 0 \\
 n_{A,2} & 2 & 2 & -1 \\
 n_{A,3} & 2 & 2 & -1 \\
 n_{L,1} & 3 & 2 & -1 \\
 n_{K,1} & 2 & 2 & 0 \\
 n_{K,2} & 2 & 2 & 0 \\
 n_{K,3} & 4 & 2 & -2 \\
 n_{H,1} & 1 & 1 & 0 \\
 n_{H,2} & 1 & 1 & 0 \\
 n_{H,3} & 2 & 1 & -1
 \end{pmatrix} \tag{186}$$

$$\begin{pmatrix}
 \text{SG186} & a_1 & a_2 & a_3 \\
 \nu & 12 & -4 & -4 \\
 n_{\Gamma,1} & 2 & 0 & 0 \\
 n_{\Gamma,2} & 2 & -1 & -1 \\
 n_{\Gamma,3} & 2 & -1 & -1 \\
 n_{M,1} & 6 & -2 & -2 \\
 n_{A,1} & 1 & 0 & 0 \\
 n_{A,2} & 2 & -1 & -1 \\
 n_{A,3} & 2 & -1 & -1 \\
 n_{L,1} & 3 & -1 & -1 \\
 n_{K,1} & 2 & -1 & 0 \\
 n_{K,2} & 2 & -1 & 0 \\
 n_{K,3} & 4 & -1 & -2 \\
 n_{H,1} & 2 & -1 & 0 \\
 n_{H,2} & 2 & -1 & 0 \\
 n_{H,3} & 4 & -1 & -2
 \end{pmatrix} \tag{187}$$

$$\begin{pmatrix}
 \text{SG187} & a_1 & a_2 & a_3 & a_4 & a_5 & a_6 & a_7 & a_8 & a_9 & a_{10} \\
 \nu & 6 & 2 & 2 & 2 & 2 & 2 & 2 & 2 & -12 & -12 \\
 n_{\Gamma,1} & 1 & 1 & 1 & 1 & 0 & 0 & 0 & 0 & -3 & -3 \\
 n_{\Gamma,2} & 1 & 0 & 0 & 0 & 1 & 1 & 1 & 1 & -3 & -3 \\
 n_{\Gamma,3} & 1 & 0 & 0 & 0 & 0 & 0 & 0 & 0 & 0 & 0 \\
 n_{M,1} & 3 & 1 & 1 & 1 & 1 & 1 & 1 & 1 & -6 & -6 \\
 n_{A,1} & 1 & 1 & 1 & 1 & 0 & 0 & 0 & 0 & -3 & -3 \\
 n_{A,2} & 1 & 0 & 0 & 0 & 0 & 1 & 0 & 1 & 0 & -3 \\
 n_{A,3} & 1 & 0 & 0 & 0 & 1 & 0 & 1 & 0 & -3 & 0 \\
 n_{L,1} & 3 & 1 & 1 & 1 & 1 & 1 & 1 & 1 & -6 & -6 \\
 n_{K,1} & 1 & 0 & 1 & 0 & 0 & 0 & 0 & 0 & 0 & 0 \\
 n_{K,2} & 1 & 0 & 0 & 1 & 0 & 0 & 1 & 1 & -3 & -3 \\
 n_{K,3} & 1 & 1 & 0 & 0 & 0 & 0 & 1 & 1 & -3 & -3 \\
 n_{K,4} & 1 & 0 & 1 & 0 & 1 & 1 & 0 & 0 & -3 & -3 \\
 n_{K,5} & 1 & 0 & 0 & 1 & 1 & 1 & 0 & 0 & -3 & -3 \\
 n_{K,6} & 1 & 1 & 0 & 0 & 0 & 0 & 0 & 0 & 0 & 0 \\
 n_{H,1} & 1 & 0 & 1 & 0 & 1 & 0 & 0 & 0 & -3 & 0 \\
 n_{H,2} & 1 & 0 & 0 & 1 & 1 & 0 & 0 & 1 & -3 & -3 \\
 n_{H,3} & 1 & 1 & 0 & 0 & 0 & 0 & 0 & 1 & 0 & -3 \\
 n_{H,4} & 1 & 0 & 1 & 0 & 0 & 1 & 0 & 0 & 0 & -3 \\
 n_{H,5} & 1 & 0 & 0 & 1 & 0 & 1 & 1 & 0 & -3 & -3 \\
 n_{H,6} & 1 & 1 & 0 & 0 & 0 & 0 & 1 & 0 & -3 & 0
 \end{pmatrix}$$

(188)

$$\begin{pmatrix}
 \text{SG188} & a_1 & a_2 & a_3 & a_4 & a_5 & a_6 & a_7 \\
 \nu & 12 & 4 & 4 & 4 & 4 & 4 & -24 \\
 n_{\Gamma,1} & 2 & 0 & 0 & 0 & 0 & 0 & 0 \\
 n_{\Gamma,2} & 2 & 1 & 1 & 1 & 2 & 2 & -9 \\
 n_{\Gamma,3} & 2 & 1 & 1 & 1 & 0 & 0 & -3 \\
 n_{M,1} & 6 & 2 & 2 & 2 & 2 & 2 & -12 \\
 n_{A,1} & 1 & 0 & 0 & 0 & 0 & 0 & 0 \\
 n_{A,2} & 1 & 0 & 0 & 0 & 0 & 0 & 0 \\
 n_{A,3} & 1 & 0 & 0 & 0 & 0 & 0 & 0 \\
 n_{A,4} & 1 & 0 & 0 & 0 & 0 & 0 & 0 \\
 n_{A,5} & 2 & 1 & 1 & 1 & 1 & 1 & -6 \\
 n_{A,6} & 2 & 1 & 1 & 1 & 1 & 1 & -6 \\
 n_{L,1} & 3 & 1 & 1 & 1 & 1 & 1 & -6 \\
 n_{L,2} & 3 & 1 & 1 & 1 & 1 & 1 & -6 \\
 n_{L,3} & 3 & 1 & 1 & 1 & 1 & 1 & -6 \\
 n_{L,4} & 3 & 1 & 1 & 1 & 1 & 1 & -6 \\
 n_{K,1} & 2 & 1 & 0 & 1 & 0 & 0 & 0 \\
 n_{K,2} & 2 & 1 & 1 & 0 & 0 & 2 & -6 \\
 n_{K,3} & 2 & 0 & 1 & 1 & 0 & 2 & -6 \\
 n_{K,4} & 2 & 1 & 0 & 1 & 2 & 0 & -6 \\
 n_{K,5} & 2 & 1 & 1 & 0 & 2 & 0 & -6 \\
 n_{K,6} & 2 & 0 & 1 & 1 & 0 & 0 & 0 \\
 n_{H,1} & 2 & 1 & 0 & 1 & 1 & 0 & -3 \\
 n_{H,2} & 2 & 1 & 1 & 0 & 1 & 1 & -6 \\
 n_{H,3} & 2 & 0 & 1 & 1 & 0 & 1 & -3 \\
 n_{H,4} & 2 & 1 & 0 & 1 & 1 & 0 & -3 \\
 n_{H,5} & 2 & 1 & 1 & 0 & 1 & 1 & -6 \\
 n_{H,6} & 2 & 0 & 1 & 1 & 0 & 1 & -3
 \end{pmatrix}$$

(189)

$$\begin{pmatrix}
 \text{SG189} & a_1 & a_2 & a_3 & a_4 & a_5 & a_6 & a_7 \\
 \nu & 6 & 8 & 2 & 4 & 4 & -36 & -36 \\
 n_{\Gamma,1} & 1 & 0 & 1 & 0 & 0 & -3 & -3 \\
 n_{\Gamma,2} & 1 & 2 & 0 & 2 & 2 & -9 & -9 \\
 n_{\Gamma,3} & 1 & 2 & 0 & 0 & 0 & -6 & -6 \\
 n_{M,1} & 3 & 4 & 1 & 2 & 2 & -18 & -18 \\
 n_{A,1} & 1 & 0 & 1 & 0 & 0 & -3 & -3 \\
 n_{A,2} & 1 & 2 & 0 & 0 & 2 & -6 & -9 \\
 n_{A,3} & 1 & 2 & 0 & 2 & 0 & -9 & -6 \\
 n_{L,1} & 3 & 4 & 1 & 2 & 2 & -18 & -18 \\
 n_{K,1} & 1 & 2 & 1 & 1 & 1 & -9 & -9 \\
 n_{K,2} & 1 & 1 & 0 & 0 & 0 & -3 & -3 \\
 n_{K,3} & 1 & 1 & 0 & 1 & 1 & -6 & -6 \\
 n_{H,1} & 1 & 2 & 1 & 1 & 1 & -9 & -9 \\
 n_{H,2} & 1 & 1 & 0 & 1 & 0 & -6 & -3 \\
 n_{H,3} & 1 & 1 & 0 & 0 & 1 & -3 & -6
 \end{pmatrix} \tag{190}$$

$$\begin{pmatrix}
 \text{SG190} & a_1 & a_2 & a_3 & a_4 & a_5 & a_6 \\
 \nu & 12 & 8 & 4 & 4 & 4 & -24 \\
 n_{\Gamma,1} & 2 & 0 & 0 & 0 & 0 & 0 \\
 n_{\Gamma,2} & 2 & 2 & 1 & 2 & 2 & -9 \\
 n_{\Gamma,3} & 2 & 2 & 1 & 0 & 0 & -3 \\
 n_{M,1} & 6 & 4 & 2 & 2 & 2 & -12 \\
 n_{A,1} & 1 & 0 & 0 & 0 & 0 & 0 \\
 n_{A,2} & 1 & 0 & 0 & 0 & 0 & 0 \\
 n_{A,3} & 1 & 0 & 0 & 0 & 0 & 0 \\
 n_{A,4} & 1 & 0 & 0 & 0 & 0 & 0 \\
 n_{A,5} & 2 & 2 & 1 & 1 & 1 & -6 \\
 n_{A,6} & 2 & 2 & 1 & 1 & 1 & -6 \\
 n_{L,1} & 3 & 2 & 1 & 1 & 1 & -6 \\
 n_{L,2} & 3 & 2 & 1 & 1 & 1 & -6 \\
 n_{L,3} & 3 & 2 & 1 & 1 & 1 & -6 \\
 n_{L,4} & 3 & 2 & 1 & 1 & 1 & -6 \\
 n_{K,1} & 2 & 2 & 0 & 1 & 1 & -6 \\
 n_{K,2} & 2 & 1 & 1 & 0 & 0 & 0 \\
 n_{K,3} & 2 & 1 & 1 & 1 & 1 & -6 \\
 n_{H,1} & 1 & 1 & 0 & 0 & 1 & -3 \\
 n_{H,2} & 1 & 1 & 0 & 0 & 1 & -3 \\
 n_{H,3} & 1 & 1 & 0 & 1 & 0 & -3 \\
 n_{H,4} & 1 & 1 & 0 & 1 & 0 & -3 \\
 n_{H,5} & 2 & 1 & 1 & 1 & 0 & -3 \\
 n_{H,6} & 2 & 1 & 1 & 0 & 1 & -3
 \end{pmatrix} \tag{191}$$

| SG191          | $a_1$ | $a_2$ | $a_3$ | $a_4$ | $a_5$ | $a_6$ | $a_7$ | $a_8$ | $a_9$ | $a_{10}$ | $a_{11}$ | $a_{12}$ | $a_{13}$ | $a_{14}$ |
|----------------|-------|-------|-------|-------|-------|-------|-------|-------|-------|----------|----------|----------|----------|----------|
| $\nu$          | 12    | 4     | 6     | 6     | 4     | 4     | 4     | 4     | 2     | 2        | -260     | 2        | 252      | -144     |
| $n_{\Gamma,1}$ | 1     | 1     | 1     | 1     | 1     | 0     | 0     | 0     | 1     | 0        | -29      | 1        | 24       | -12      |
| $n_{\Gamma,2}$ | 1     | 0     | 1     | 1     | 0     | 1     | 1     | 1     | 0     | 1        | -47      | 0        | 48       | -36      |
| $n_{\Gamma,3}$ | 1     | 0     | 1     | 1     | 0     | 0     | 0     | 0     | 0     | 0        | -18      | 0        | 18       | -12      |
| $n_{\Gamma,4}$ | 1     | 1     | 0     | 0     | 1     | 0     | 0     | 0     | 0     | 0        | -12      | 0        | 12       | 0        |
| $n_{\Gamma,5}$ | 1     | 0     | 0     | 0     | 0     | 1     | 0     | 0     | 0     | 0        | -6       | 0        | 6        | 0        |
| $n_{\Gamma,6}$ | 1     | 0     | 0     | 0     | 0     | 0     | 1     | 1     | 0     | 0        | -18      | 0        | 18       | -12      |
| $n_{M,1}$      | 3     | 1     | 1     | 1     | 1     | 1     | 1     | 1     | 1     | 1        | -64      | 1        | 60       | -36      |
| $n_{M,2}$      | 3     | 1     | 2     | 2     | 1     | 1     | 1     | 1     | 0     | 0        | -66      | 0        | 66       | -36      |
| $n_{A,1}$      | 1     | 1     | 0     | 1     | 1     | 0     | 0     | 0     | 0     | 0        | -23      | 1        | 18       | -12      |
| $n_{A,2}$      | 1     | 0     | 0     | 1     | 0     | 1     | 0     | 1     | 0     | 0        | -29      | 0        | 30       | -24      |
| $n_{A,3}$      | 1     | 0     | 0     | 1     | 0     | 0     | 1     | 0     | 0     | 0        | -18      | 0        | 18       | -12      |
| $n_{A,4}$      | 1     | 1     | 1     | 0     | 1     | 0     | 0     | 0     | 1     | 0        | -18      | 0        | 18       | 0        |
| $n_{A,5}$      | 1     | 0     | 1     | 0     | 0     | 1     | 1     | 0     | 0     | 1        | -24      | 0        | 24       | -12      |
| $n_{A,6}$      | 1     | 0     | 1     | 0     | 0     | 0     | 0     | 1     | 0     | 0        | -18      | 0        | 18       | -12      |
| $n_{L,1}$      | 3     | 1     | 2     | 1     | 1     | 1     | 1     | 1     | 0     | 0        | -64      | 1        | 60       | -36      |
| $n_{L,2}$      | 3     | 1     | 1     | 2     | 1     | 1     | 1     | 1     | 1     | 1        | -66      | 0        | 66       | -36      |
| $n_{K,1}$      | 2     | 0     | 1     | 1     | 2     | 0     | 1     | 1     | 1     | 0        | -47      | 1        | 42       | -24      |
| $n_{K,2}$      | 2     | 1     | 1     | 1     | 0     | 1     | 0     | 0     | 0     | 1        | -41      | 0        | 42       | -24      |
| $n_{K,3}$      | 2     | 1     | 1     | 1     | 0     | 1     | 1     | 1     | 0     | 0        | -42      | 0        | 42       | -24      |
| $n_{H,1}$      | 2     | 0     | 1     | 1     | 2     | 0     | 1     | 1     | 1     | 0        | -47      | 1        | 42       | -24      |
| $n_{H,2}$      | 2     | 1     | 1     | 1     | 0     | 1     | 1     | 0     | 0     | 0        | -41      | 0        | 42       | -24      |
| $n_{H,3}$      | 2     | 1     | 1     | 1     | 0     | 1     | 0     | 1     | 0     | 1        | -42      | 0        | 42       | -24      |

| SG192          | $a_1$ | $a_2$ | $a_3$ | $a_4$ | $a_5$ | $a_6$ | $a_7$ | $a_8$ | $a_9$ |
|----------------|-------|-------|-------|-------|-------|-------|-------|-------|-------|
| $\nu$          | 12    | 8     | 12    | 4     | 4     | 8     | 4     | 4     | -336  |
| $n_{\Gamma,1}$ | 1     | 0     | 2     | 0     | 1     | 0     | 0     | 2     | -36   |
| $n_{\Gamma,2}$ | 1     | 1     | 2     | 1     | 0     | 2     | 2     | 0     | -60   |
| $n_{\Gamma,3}$ | 1     | 1     | 2     | 0     | 0     | 0     | 0     | 0     | -24   |
| $n_{\Gamma,4}$ | 1     | 0     | 0     | 0     | 1     | 0     | 0     | 0     | -12   |
| $n_{\Gamma,5}$ | 1     | 1     | 0     | 1     | 0     | 0     | 0     | 0     | -12   |
| $n_{\Gamma,6}$ | 1     | 1     | 0     | 0     | 0     | 2     | 0     | 0     | -24   |
| $n_{M,1}$      | 3     | 2     | 2     | 1     | 1     | 2     | 2     | 2     | -84   |
| $n_{M,2}$      | 3     | 2     | 4     | 1     | 1     | 2     | 0     | 0     | -84   |
| $n_{A,1}$      | 1     | 0     | 1     | 0     | 1     | 0     | 0     | 1     | -24   |
| $n_{A,2}$      | 1     | 0     | 1     | 0     | 1     | 0     | 0     | 1     | -24   |
| $n_{A,3}$      | 1     | 1     | 1     | 0     | 0     | 1     | 0     | 0     | -24   |
| $n_{A,4}$      | 1     | 1     | 1     | 1     | 0     | 1     | 1     | 0     | -36   |
| $n_{A,5}$      | 1     | 1     | 1     | 0     | 0     | 1     | 0     | 0     | -24   |
| $n_{A,6}$      | 1     | 1     | 1     | 1     | 0     | 1     | 1     | 0     | -36   |
| $n_{L,1}$      | 3     | 2     | 3     | 1     | 1     | 2     | 1     | 1     | -84   |
| $n_{L,2}$      | 3     | 2     | 3     | 1     | 1     | 2     | 1     | 1     | -84   |
| $n_{K,1}$      | 2     | 2     | 2     | 0     | 2     | 2     | 0     | 2     | -72   |
| $n_{K,2}$      | 2     | 1     | 2     | 1     | 0     | 0     | 2     | 0     | -48   |
| $n_{K,3}$      | 2     | 1     | 2     | 1     | 0     | 2     | 0     | 0     | -48   |
| $n_{H,1}$      | 1     | 1     | 1     | 0     | 1     | 1     | 0     | 1     | -36   |
| $n_{H,2}$      | 1     | 1     | 1     | 0     | 1     | 1     | 0     | 1     | -36   |
| $n_{H,3}$      | 1     | 1     | 1     | 0     | 1     | 1     | 0     | 1     | -36   |
| $n_{H,4}$      | 1     | 1     | 1     | 0     | 1     | 1     | 0     | 1     | -36   |
| $n_{H,5}$      | 2     | 1     | 2     | 1     | 0     | 1     | 1     | 0     | -48   |
| $n_{H,6}$      | 2     | 1     | 2     | 1     | 0     | 1     | 1     | 0     | -48   |

$$\begin{pmatrix}
 \text{SG193} & a_1 & a_2 & a_3 & a_4 & a_5 & a_6 & a_7 & a_8 \\
 \nu & 12 & 8 & 12 & 4 & 8 & 4 & -32 & 240 \\
 n_{\Gamma,1} & 1 & 0 & 2 & 1 & 0 & 0 & -3 & 24 \\
 n_{\Gamma,2} & 1 & 1 & 2 & 0 & 2 & 1 & -2 & 12 \\
 n_{\Gamma,3} & 1 & 1 & 2 & 0 & 0 & 1 & 1 & -12 \\
 n_{\Gamma,4} & 1 & 0 & 0 & 1 & 0 & 0 & -3 & 24 \\
 n_{\Gamma,5} & 1 & 1 & 0 & 0 & 0 & 0 & -3 & 24 \\
 n_{\Gamma,6} & 1 & 1 & 0 & 0 & 2 & 0 & -6 & 48 \\
 n_{M,1} & 3 & 2 & 2 & 1 & 2 & 2 & -8 & 60 \\
 n_{M,2} & 3 & 2 & 4 & 1 & 2 & 0 & -8 & 60 \\
 n_{A,1} & 1 & 0 & 1 & 1 & 0 & 0 & -3 & 24 \\
 n_{A,2} & 1 & 0 & 1 & 1 & 0 & 0 & -3 & 24 \\
 n_{A,3} & 2 & 2 & 2 & 0 & 2 & 1 & -5 & 36 \\
 n_{L,1} & 3 & 2 & 3 & 1 & 2 & 1 & -8 & 60 \\
 n_{L,2} & 3 & 2 & 3 & 1 & 2 & 1 & -8 & 60 \\
 n_{K,1} & 2 & 2 & 2 & 2 & 2 & 0 & -12 & 96 \\
 n_{K,2} & 2 & 1 & 2 & 0 & 0 & 1 & 1 & -12 \\
 n_{K,3} & 2 & 1 & 2 & 0 & 2 & 1 & -5 & 36 \\
 n_{H,1} & 1 & 1 & 1 & 1 & 1 & 0 & -6 & 48 \\
 n_{H,2} & 2 & 1 & 2 & 0 & 1 & 1 & -2 & 12 \\
 n_{H,3} & 2 & 1 & 2 & 0 & 1 & 1 & -2 & 12
 \end{pmatrix}
 \tag{194}$$

$$\begin{pmatrix}
 \text{SG194} & a_1 & a_2 & a_3 & a_4 & a_5 & a_6 & a_7 & a_8 & a_9 \\
 \nu & 12 & 12 & 4 & 4 & 4 & 4 & -4 & 4 & 0 \\
 n_{\Gamma,1} & 1 & 2 & 1 & 1 & 0 & 0 & -3 & 0 & 12 \\
 n_{\Gamma,2} & 1 & 2 & 0 & 0 & 1 & 1 & 2 & 1 & -12 \\
 n_{\Gamma,3} & 1 & 2 & 0 & 0 & 0 & 0 & 5 & 1 & -24 \\
 n_{\Gamma,4} & 1 & 0 & 1 & 1 & 0 & 0 & -3 & 0 & 12 \\
 n_{\Gamma,5} & 1 & 0 & 0 & 0 & 0 & 0 & 0 & 0 & 0 \\
 n_{\Gamma,6} & 1 & 0 & 0 & 0 & 1 & 1 & -3 & 0 & 12 \\
 n_{M,1} & 3 & 2 & 1 & 1 & 1 & 1 & 0 & 2 & -12 \\
 n_{M,2} & 3 & 4 & 1 & 1 & 1 & 1 & -2 & 0 & 12 \\
 n_{A,1} & 1 & 1 & 1 & 1 & 0 & 0 & -3 & 0 & 12 \\
 n_{A,2} & 1 & 1 & 1 & 1 & 0 & 0 & -3 & 0 & 12 \\
 n_{A,3} & 2 & 2 & 0 & 0 & 1 & 1 & 2 & 1 & -12 \\
 n_{L,1} & 3 & 3 & 1 & 1 & 1 & 1 & -1 & 1 & 0 \\
 n_{L,2} & 3 & 3 & 1 & 1 & 1 & 1 & -1 & 1 & 0 \\
 n_{K,1} & 2 & 2 & 0 & 2 & 1 & 1 & -6 & 0 & 24 \\
 n_{K,2} & 2 & 2 & 1 & 0 & 0 & 0 & 5 & 1 & -24 \\
 n_{K,3} & 2 & 2 & 1 & 0 & 1 & 1 & -1 & 1 & 0 \\
 n_{H,1} & 1 & 1 & 0 & 1 & 0 & 1 & -3 & 0 & 12 \\
 n_{H,2} & 1 & 1 & 0 & 1 & 0 & 1 & -3 & 0 & 12 \\
 n_{H,3} & 1 & 1 & 0 & 1 & 1 & 0 & -3 & 0 & 12 \\
 n_{H,4} & 1 & 1 & 0 & 1 & 1 & 0 & -3 & 0 & 12 \\
 n_{H,5} & 2 & 2 & 1 & 0 & 1 & 0 & 2 & 1 & -12 \\
 n_{H,6} & 2 & 2 & 1 & 0 & 0 & 1 & 2 & 1 & -12
 \end{pmatrix}
 \tag{195}$$

$$\begin{pmatrix} \text{SG195} & a_1 & a_2 \\ \nu & 6 & 8 \\ n_{\Gamma,1} & 1 & 2 \\ n_{\Gamma,2} & 1 & 1 \\ n_{\Gamma,3} & 1 & 1 \\ n_{X,1} & 3 & 4 \\ n_{M,1} & 3 & 4 \\ n_{R,1} & 1 & 2 \\ n_{R,2} & 1 & 1 \\ n_{R,3} & 1 & 1 \end{pmatrix} \quad (196)$$

$$\begin{pmatrix} \text{SG196} & a_1 & a_2 \\ \nu & 6 & 8 \\ n_{\Gamma,1} & 1 & 2 \\ n_{\Gamma,2} & 1 & 1 \\ n_{\Gamma,3} & 1 & 1 \\ n_{X,1} & 3 & 4 \\ n_{L,1} & 2 & 3 \\ n_{L,2} & 1 & 1 \\ n_{L,3} & 2 & 3 \\ n_{W,1} & 3 & 4 \\ n_{W,2} & 3 & 4 \end{pmatrix} \quad (197)$$

$$\begin{pmatrix} \text{SG197} & a_1 & a_2 \\ \nu & 6 & 8 \\ n_{\Gamma,1} & 1 & 2 \\ n_{\Gamma,2} & 1 & 1 \\ n_{\Gamma,3} & 1 & 1 \\ n_{H,1} & 1 & 2 \\ n_{H,2} & 1 & 1 \\ n_{H,3} & 1 & 1 \\ n_{P,1} & 1 & 2 \\ n_{P,2} & 1 & 1 \\ n_{P,3} & 1 & 1 \\ n_{N,1} & 3 & 4 \\ n_{N,2} & 3 & 4 \end{pmatrix} \quad (198)$$

$$\begin{pmatrix} \text{SG198} & a_1 & a_2 \\ \nu & 24 & 8 \\ n_{\Gamma,1} & 4 & 2 \\ n_{\Gamma,2} & 4 & 1 \\ n_{\Gamma,3} & 4 & 1 \\ n_{X,1} & 6 & 2 \\ n_{X,2} & 6 & 2 \\ n_{X,3} & 6 & 2 \\ n_{X,4} & 6 & 2 \\ n_{M,1} & 6 & 2 \\ n_{R,1} & 1 & 0 \\ n_{R,2} & 2 & 1 \\ n_{R,3} & 2 & 1 \\ n_{R,4} & 3 & 1 \end{pmatrix} \quad (199)$$

$$\begin{pmatrix} \text{SG199} & a_1 & a_2 \\ \nu & 12 & 8 \\ n_{\Gamma,1} & 2 & 2 \\ n_{\Gamma,2} & 2 & 1 \\ n_{\Gamma,3} & 2 & 1 \\ n_{\text{H},1} & 2 & 2 \\ n_{\text{H},2} & 2 & 1 \\ n_{\text{H},3} & 2 & 1 \\ n_{\text{P},1} & 1 & 0 \\ n_{\text{P},2} & 1 & 1 \\ n_{\text{P},3} & 1 & 1 \\ n_{\text{P},4} & 3 & 2 \\ n_{\text{N},1} & 6 & 4 \\ n_{\text{N},2} & 6 & 4 \end{pmatrix}$$

(200)

$$\begin{pmatrix} \text{SG200} & a_1 & a_2 & a_3 & a_4 & a_5 & a_6 & a_7 & a_8 \\ \nu & 12 & 16 & 6 & 6 & 2 & -10 & 12 & -8 \\ n_{\Gamma,1} & 1 & 2 & 1 & 1 & 1 & -5 & 6 & -4 \\ n_{\Gamma,2} & 1 & 1 & 1 & 1 & 0 & 0 & 0 & 0 \\ n_{\Gamma,3} & 1 & 1 & 1 & 1 & 0 & 0 & 0 & 0 \\ n_{\Gamma,4} & 1 & 2 & 0 & 0 & 0 & 0 & 0 & 0 \\ n_{\Gamma,5} & 1 & 1 & 0 & 0 & 0 & 0 & 0 & 0 \\ n_{\Gamma,6} & 1 & 1 & 0 & 0 & 0 & 0 & 0 & 0 \\ n_{\text{X},1} & 3 & 4 & 2 & 1 & 0 & -1 & 2 & 0 \\ n_{\text{X},2} & 3 & 4 & 1 & 2 & 1 & -4 & 4 & -4 \\ n_{\text{M},1} & 3 & 4 & 1 & 1 & 1 & -3 & 4 & -4 \\ n_{\text{M},2} & 3 & 4 & 2 & 2 & 0 & -2 & 2 & 0 \\ n_{\text{R},1} & 1 & 2 & 0 & 1 & 0 & -3 & 4 & -4 \\ n_{\text{R},2} & 1 & 1 & 0 & 1 & 0 & 0 & 0 & 0 \\ n_{\text{R},3} & 1 & 1 & 0 & 1 & 0 & 0 & 0 & 0 \\ n_{\text{R},4} & 1 & 2 & 1 & 0 & 1 & -2 & 2 & 0 \\ n_{\text{R},5} & 1 & 1 & 1 & 0 & 0 & 0 & 0 & 0 \\ n_{\text{R},6} & 1 & 1 & 1 & 0 & 0 & 0 & 0 & 0 \end{pmatrix}$$

(201)

$$\begin{pmatrix} \text{SG201} & a_1 & a_2 & a_3 & a_4 & a_5 & a_6 \\ \nu & 12 & 16 & 8 & -16 & 24 & -32 \\ n_{\Gamma,1} & 1 & 2 & 2 & -6 & 8 & -8 \\ n_{\Gamma,2} & 1 & 1 & 1 & -1 & 2 & -4 \\ n_{\Gamma,3} & 1 & 1 & 1 & -1 & 2 & -4 \\ n_{\Gamma,4} & 1 & 2 & 0 & 0 & 0 & 0 \\ n_{\Gamma,5} & 1 & 1 & 0 & 0 & 0 & 0 \\ n_{\Gamma,6} & 1 & 1 & 0 & 0 & 0 & 0 \\ n_{\text{X},1} & 3 & 4 & 2 & -4 & 6 & -8 \\ n_{\text{X},2} & 3 & 4 & 2 & -4 & 6 & -8 \\ n_{\text{M},1} & 3 & 4 & 2 & -4 & 6 & -8 \\ n_{\text{M},2} & 3 & 4 & 2 & -4 & 6 & -8 \\ n_{\text{R},1} & 1 & 2 & 0 & -2 & 4 & -4 \\ n_{\text{R},2} & 1 & 1 & 0 & 1 & 0 & 0 \\ n_{\text{R},3} & 1 & 1 & 0 & 1 & 0 & 0 \\ n_{\text{R},4} & 1 & 2 & 2 & -4 & 4 & -4 \\ n_{\text{R},5} & 1 & 1 & 1 & -2 & 2 & -4 \\ n_{\text{R},6} & 1 & 1 & 1 & -2 & 2 & -4 \end{pmatrix}$$

(202)



$$\begin{pmatrix}
 \text{SG202} & a_1 & a_2 & a_3 & a_4 & a_5 & a_6 & a_7 \\
 \nu & 12 & 16 & 12 & 2 & 4 & 2 & -32 \\
 n_{\Gamma,1} & 1 & 2 & 2 & 1 & 0 & 1 & -8 \\
 n_{\Gamma,2} & 1 & 1 & 2 & 0 & 1 & 0 & -4 \\
 n_{\Gamma,3} & 1 & 1 & 2 & 0 & 1 & 0 & -4 \\
 n_{\Gamma,4} & 1 & 2 & 0 & 0 & 0 & 0 & 0 \\
 n_{\Gamma,5} & 1 & 1 & 0 & 0 & 0 & 0 & 0 \\
 n_{\Gamma,6} & 1 & 1 & 0 & 0 & 0 & 0 & 0 \\
 n_{X,1} & 3 & 4 & 2 & 1 & 2 & 1 & -12 \\
 n_{X,2} & 3 & 4 & 4 & 0 & 0 & 0 & -4 \\
 n_{L,1} & 1 & 1 & 1 & 0 & 1 & 0 & -4 \\
 n_{L,2} & 2 & 3 & 2 & 0 & 0 & 1 & -4 \\
 n_{L,3} & 2 & 3 & 2 & 1 & 1 & 0 & -8 \\
 n_{L,4} & 1 & 1 & 1 & 0 & 0 & 0 & 0 \\
 n_{L,5} & 2 & 3 & 2 & 1 & 1 & 0 & -8 \\
 n_{L,6} & 2 & 3 & 2 & 0 & 0 & 1 & -4 \\
 n_{W,1} & 6 & 8 & 6 & 1 & 2 & 1 & -16
 \end{pmatrix} \tag{203}$$

$$\begin{pmatrix}
 \text{SG203} & a_1 & a_2 & a_3 & a_4 & a_5 & a_6 \\
 \nu & 12 & 16 & 8 & 8 & 8 & -48 \\
 n_{\Gamma,1} & 1 & 2 & 2 & 0 & 2 & -8 \\
 n_{\Gamma,2} & 1 & 1 & 1 & 2 & 1 & -8 \\
 n_{\Gamma,3} & 1 & 1 & 1 & 2 & 1 & -8 \\
 n_{\Gamma,4} & 1 & 2 & 0 & 0 & 0 & 0 \\
 n_{\Gamma,5} & 1 & 1 & 0 & 0 & 0 & 0 \\
 n_{\Gamma,6} & 1 & 1 & 0 & 0 & 0 & 0 \\
 n_{X,1} & 3 & 4 & 2 & 2 & 2 & -12 \\
 n_{X,2} & 3 & 4 & 2 & 2 & 2 & -12 \\
 n_{L,1} & 1 & 1 & 0 & 1 & 1 & -4 \\
 n_{L,2} & 2 & 3 & 2 & 2 & 1 & -12 \\
 n_{L,3} & 2 & 3 & 1 & 0 & 2 & -4 \\
 n_{L,4} & 1 & 1 & 1 & 1 & 0 & -4 \\
 n_{L,5} & 2 & 3 & 1 & 0 & 2 & -4 \\
 n_{L,6} & 2 & 3 & 2 & 2 & 1 & -12 \\
 n_{W,1} & 3 & 4 & 2 & 2 & 2 & -12 \\
 n_{W,2} & 3 & 4 & 2 & 2 & 2 & -12 \\
 n_{W,3} & 3 & 4 & 2 & 2 & 2 & -12 \\
 n_{W,4} & 3 & 4 & 2 & 2 & 2 & -12
 \end{pmatrix} \tag{204}$$

$$\begin{pmatrix}
 \text{SG204} & a_1 & a_2 & a_3 & a_4 & a_5 & a_6 & a_7 \\
 \nu & 12 & 16 & 8 & -16 & 6 & 12 & -32 \\
 n_{\Gamma,1} & 1 & 2 & 2 & -6 & 1 & 6 & -8 \\
 n_{\Gamma,2} & 1 & 1 & 1 & -1 & 1 & 0 & -4 \\
 n_{\Gamma,3} & 1 & 1 & 1 & -1 & 1 & 0 & -4 \\
 n_{\Gamma,4} & 1 & 2 & 0 & 0 & 0 & 0 & 0 \\
 n_{\Gamma,5} & 1 & 1 & 0 & 0 & 0 & 0 & 0 \\
 n_{\Gamma,6} & 1 & 1 & 0 & 0 & 0 & 0 & 0 \\
 n_{\text{H},1} & 1 & 2 & 0 & -2 & 1 & 2 & -4 \\
 n_{\text{H},2} & 1 & 1 & 0 & 1 & 1 & -2 & 0 \\
 n_{\text{H},3} & 1 & 1 & 0 & 1 & 1 & -2 & 0 \\
 n_{\text{H},4} & 1 & 2 & 2 & -4 & 0 & 4 & -4 \\
 n_{\text{H},5} & 1 & 1 & 1 & -2 & 0 & 2 & -4 \\
 n_{\text{H},6} & 1 & 1 & 1 & -2 & 0 & 2 & -4 \\
 n_{\text{P},1} & 2 & 4 & 2 & -6 & 1 & 6 & -8 \\
 n_{\text{P},2} & 2 & 2 & 1 & -1 & 1 & 0 & -4 \\
 n_{\text{P},3} & 2 & 2 & 1 & -1 & 1 & 0 & -4 \\
 n_{\text{N},1} & 3 & 4 & 2 & -4 & 1 & 4 & -8 \\
 n_{\text{N},2} & 3 & 4 & 2 & -4 & 1 & 4 & -8 \\
 n_{\text{N},3} & 3 & 4 & 2 & -4 & 2 & 2 & -8 \\
 n_{\text{N},4} & 3 & 4 & 2 & -4 & 2 & 2 & -8
 \end{pmatrix}
 \tag{205}$$

$$\begin{pmatrix}
 \text{SG205} & a_1 & a_2 & a_3 & a_4 & a_5 & a_6 \\
 \nu & 48 & 16 & 8 & 8 & 8 & -96 \\
 n_{\Gamma,1} & 4 & 2 & 2 & 0 & 2 & -12 \\
 n_{\Gamma,2} & 4 & 1 & 1 & 2 & 1 & -12 \\
 n_{\Gamma,3} & 4 & 1 & 1 & 2 & 1 & -12 \\
 n_{\Gamma,4} & 4 & 2 & 0 & 0 & 0 & -4 \\
 n_{\Gamma,5} & 4 & 1 & 0 & 0 & 0 & -4 \\
 n_{\Gamma,6} & 4 & 1 & 0 & 0 & 0 & -4 \\
 n_{\text{X},1} & 12 & 4 & 2 & 2 & 2 & -24 \\
 n_{\text{X},2} & 12 & 4 & 2 & 2 & 2 & -24 \\
 n_{\text{M},1} & 6 & 2 & 1 & 1 & 1 & -12 \\
 n_{\text{M},2} & 6 & 2 & 1 & 1 & 1 & -12 \\
 n_{\text{R},1} & 1 & 0 & 0 & 0 & 0 & 0 \\
 n_{\text{R},2} & 2 & 1 & 0 & 0 & 1 & -4 \\
 n_{\text{R},3} & 2 & 1 & 0 & 0 & 1 & -4 \\
 n_{\text{R},4} & 3 & 1 & 0 & 0 & 1 & -4 \\
 n_{\text{R},5} & 1 & 0 & 0 & 1 & 0 & -4 \\
 n_{\text{R},6} & 2 & 1 & 1 & 0 & 0 & -4 \\
 n_{\text{R},7} & 2 & 1 & 1 & 0 & 0 & -4 \\
 n_{\text{R},8} & 3 & 1 & 1 & 1 & 0 & -8
 \end{pmatrix}
 \tag{206}$$

$$\begin{pmatrix}
 \text{SG206} & a_1 & a_2 & a_3 & a_4 & a_5 & a_6 \\
 \nu & 24 & 16 & 8 & -40 & 48 & -32 \\
 n_{\Gamma,1} & 2 & 2 & 2 & -8 & 10 & -8 \\
 n_{\Gamma,2} & 2 & 1 & 1 & -3 & 4 & -4 \\
 n_{\Gamma,3} & 2 & 1 & 1 & -3 & 4 & -4 \\
 n_{\Gamma,4} & 2 & 2 & 0 & -2 & 2 & 0 \\
 n_{\Gamma,5} & 2 & 1 & 0 & -2 & 2 & 0 \\
 n_{\Gamma,6} & 2 & 1 & 0 & -2 & 2 & 0 \\
 n_{\text{H},1} & 2 & 2 & 0 & -4 & 6 & -4 \\
 n_{\text{H},2} & 2 & 1 & 0 & -1 & 2 & 0 \\
 n_{\text{H},3} & 2 & 1 & 0 & -1 & 2 & 0 \\
 n_{\text{H},4} & 2 & 2 & 2 & -6 & 6 & -4 \\
 n_{\text{H},5} & 2 & 1 & 1 & -4 & 4 & -4 \\
 n_{\text{H},6} & 2 & 1 & 1 & -4 & 4 & -4 \\
 n_{\text{P},1} & 1 & 0 & 0 & 0 & 0 & 0 \\
 n_{\text{P},2} & 2 & 2 & 1 & -5 & 6 & -4 \\
 n_{\text{P},3} & 2 & 2 & 1 & -5 & 6 & -4 \\
 n_{\text{N},1} & 6 & 4 & 2 & -10 & 12 & -8
 \end{pmatrix} \tag{207}$$

$$\begin{pmatrix}
 \text{SG207} & a_1 & a_2 & a_3 & a_4 \\
 \nu & 12 & 8 & 6 & 6 \\
 n_{\Gamma,1} & 1 & 1 & 1 & 1 \\
 n_{\Gamma,2} & 1 & 1 & 0 & 0 \\
 n_{\Gamma,3} & 2 & 1 & 1 & 1 \\
 n_{\text{X},1} & 3 & 2 & 2 & 2 \\
 n_{\text{X},2} & 3 & 2 & 1 & 1 \\
 n_{\text{M},1} & 3 & 2 & 1 & 2 \\
 n_{\text{M},2} & 3 & 2 & 2 & 1 \\
 n_{\text{R},1} & 1 & 1 & 0 & 1 \\
 n_{\text{R},2} & 1 & 1 & 1 & 0 \\
 n_{\text{R},3} & 2 & 1 & 1 & 1
 \end{pmatrix} \tag{208}$$

$$\begin{pmatrix}
 \text{SG208} & a_1 & a_2 \\
 \nu & 12 & 8 \\
 n_{\Gamma,1} & 1 & 1 \\
 n_{\Gamma,2} & 1 & 1 \\
 n_{\Gamma,3} & 2 & 1 \\
 n_{\text{X},1} & 3 & 2 \\
 n_{\text{X},2} & 3 & 2 \\
 n_{\text{M},1} & 3 & 2 \\
 n_{\text{M},2} & 3 & 2 \\
 n_{\text{R},1} & 1 & 1 \\
 n_{\text{R},2} & 1 & 1 \\
 n_{\text{R},3} & 2 & 1
 \end{pmatrix} \tag{209}$$

$$\begin{pmatrix} \text{SG209} & a_1 & a_2 & a_3 \\ \nu & 12 & 8 & 6 \\ n_{\Gamma,1} & 1 & 1 & 1 \\ n_{\Gamma,2} & 1 & 1 & 0 \\ n_{\Gamma,3} & 2 & 1 & 1 \\ n_{X,1} & 3 & 2 & 2 \\ n_{X,2} & 3 & 2 & 1 \\ n_{L,1} & 2 & 1 & 1 \\ n_{L,2} & 2 & 1 & 1 \\ n_{L,3} & 4 & 3 & 2 \\ n_{W,1} & 6 & 4 & 3 \end{pmatrix} \tag{210}$$

$$\begin{pmatrix} \text{SG210} & a_1 & a_2 \\ \nu & 12 & 8 \\ n_{\Gamma,1} & 1 & 1 \\ n_{\Gamma,2} & 1 & 1 \\ n_{\Gamma,3} & 2 & 1 \\ n_{X,1} & 3 & 2 \\ n_{X,2} & 3 & 2 \\ n_{L,1} & 2 & 1 \\ n_{L,2} & 2 & 1 \\ n_{L,3} & 4 & 3 \\ n_{W,1} & 3 & 2 \\ n_{W,2} & 3 & 2 \\ n_{W,3} & 3 & 2 \\ n_{W,4} & 3 & 2 \end{pmatrix} \tag{211}$$

$$\begin{pmatrix} \text{SG211} & a_1 & a_2 & a_3 \\ \nu & 12 & 8 & 6 \\ n_{\Gamma,1} & 1 & 1 & 1 \\ n_{\Gamma,2} & 1 & 1 & 0 \\ n_{\Gamma,3} & 2 & 1 & 1 \\ n_{H,1} & 1 & 1 & 1 \\ n_{H,2} & 1 & 1 & 0 \\ n_{H,3} & 2 & 1 & 1 \\ n_{P,1} & 2 & 2 & 1 \\ n_{P,2} & 2 & 1 & 1 \\ n_{P,3} & 2 & 1 & 1 \\ n_{N,1} & 6 & 4 & 3 \end{pmatrix} \tag{212}$$

$$\begin{pmatrix} \text{SG212} & a_1 & a_2 \\ \nu & 24 & 8 \\ n_{\Gamma,1} & 2 & 1 \\ n_{\Gamma,2} & 2 & 1 \\ n_{\Gamma,3} & 4 & 1 \\ n_{X,1} & 3 & 1 \\ n_{X,2} & 3 & 1 \\ n_{X,3} & 3 & 1 \\ n_{X,4} & 3 & 1 \\ n_{X,5} & 6 & 2 \\ n_{M,1} & 6 & 2 \\ n_{M,2} & 6 & 2 \\ n_{R,1} & 1 & 0 \\ n_{R,2} & 1 & 0 \\ n_{R,3} & 2 & 1 \\ n_{R,4} & 3 & 1 \\ n_{R,5} & 3 & 1 \end{pmatrix} \tag{213}$$

$$\begin{pmatrix} \text{SG213} & a_1 & a_2 \\ \nu & 24 & 8 \\ n_{\Gamma,1} & 2 & 1 \\ n_{\Gamma,2} & 2 & 1 \\ n_{\Gamma,3} & 4 & 1 \\ n_{X,1} & 3 & 1 \\ n_{X,2} & 3 & 1 \\ n_{X,3} & 3 & 1 \\ n_{X,4} & 3 & 1 \\ n_{X,5} & 6 & 2 \\ n_{M,1} & 6 & 2 \\ n_{M,2} & 6 & 2 \\ n_{R,1} & 1 & 0 \\ n_{R,2} & 1 & 0 \\ n_{R,3} & 2 & 1 \\ n_{R,4} & 3 & 1 \\ n_{R,5} & 3 & 1 \end{pmatrix} \tag{214}$$

$$\begin{pmatrix} \text{SG214} & a_1 & a_2 \\ \nu & 12 & 8 \\ n_{\Gamma,1} & 1 & 1 \\ n_{\Gamma,2} & 1 & 1 \\ n_{\Gamma,3} & 2 & 1 \\ n_{H,1} & 1 & 1 \\ n_{H,2} & 1 & 1 \\ n_{H,3} & 2 & 1 \\ n_{P,1} & 1 & 0 \\ n_{P,2} & 1 & 1 \\ n_{P,3} & 1 & 1 \\ n_{P,4} & 3 & 2 \\ n_{N,1} & 6 & 4 \end{pmatrix} \tag{215}$$

$$\begin{pmatrix}
 \text{SG215} & a_1 & a_2 & a_3 & a_4 & a_5 & a_6 \\
 \nu & 12 & 4 & 6 & 6 & 2 & -12 \\
 n_{\Gamma,1} & 1 & 0 & 1 & 1 & 1 & -2 \\
 n_{\Gamma,2} & 1 & 0 & 0 & 0 & 0 & 0 \\
 n_{\Gamma,3} & 2 & 1 & 1 & 1 & 0 & -2 \\
 n_{X,1} & 3 & 1 & 2 & 1 & 1 & -4 \\
 n_{X,2} & 3 & 1 & 1 & 2 & 0 & -2 \\
 n_{M,1} & 3 & 1 & 1 & 2 & 1 & -4 \\
 n_{M,2} & 3 & 1 & 2 & 1 & 0 & -2 \\
 n_{R,1} & 1 & 0 & 1 & 1 & 0 & -2 \\
 n_{R,2} & 1 & 0 & 0 & 0 & 1 & 0 \\
 n_{R,3} & 2 & 1 & 1 & 1 & 0 & -2
 \end{pmatrix} \tag{216}$$

$$\begin{pmatrix}
 \text{SG216} & a_1 & a_2 & a_3 & a_4 & a_5 & a_6 \\
 \nu & 12 & 4 & 2 & 2 & 2 & -4 \\
 n_{\Gamma,1} & 1 & 0 & 1 & 1 & 1 & -2 \\
 n_{\Gamma,2} & 1 & 0 & 0 & 0 & 0 & 0 \\
 n_{\Gamma,3} & 2 & 1 & 0 & 0 & 0 & 0 \\
 n_{X,1} & 3 & 1 & 1 & 1 & 0 & -2 \\
 n_{X,2} & 3 & 1 & 0 & 0 & 1 & 0 \\
 n_{L,1} & 2 & 1 & 0 & 0 & 0 & 0 \\
 n_{L,2} & 2 & 1 & 0 & 0 & 0 & 0 \\
 n_{L,3} & 4 & 1 & 1 & 1 & 1 & -2 \\
 n_{W,1} & 3 & 1 & 0 & 1 & 1 & -2 \\
 n_{W,2} & 3 & 1 & 0 & 1 & 0 & 0 \\
 n_{W,3} & 3 & 1 & 1 & 0 & 0 & 0 \\
 n_{W,4} & 3 & 1 & 1 & 0 & 1 & -2
 \end{pmatrix} \tag{217}$$

$$\begin{pmatrix}
 \text{SG217} & a_1 & a_2 & a_3 & a_4 & a_5 \\
 \nu & 12 & 12 & 4 & 6 & -20 \\
 n_{\Gamma,1} & 1 & 2 & 0 & 1 & -2 \\
 n_{\Gamma,2} & 1 & 0 & 0 & 0 & 0 \\
 n_{\Gamma,3} & 2 & 2 & 1 & 1 & -4 \\
 n_{H,1} & 1 & 0 & 0 & 1 & 0 \\
 n_{H,2} & 1 & 2 & 0 & 0 & -2 \\
 n_{H,3} & 2 & 2 & 1 & 1 & -4 \\
 n_{P,1} & 1 & 1 & 0 & 0 & 0 \\
 n_{P,2} & 1 & 1 & 0 & 1 & -2 \\
 n_{P,3} & 2 & 2 & 1 & 1 & -4 \\
 n_{N,1} & 6 & 6 & 2 & 3 & -10
 \end{pmatrix} \tag{218}$$

$$\begin{pmatrix}
 \text{SG218} & a_1 & a_2 & a_3 & a_4 \\
 \nu & 12 & 16 & 12 & 0 \\
 n_{\Gamma,1} & 1 & 2 & 2 & 0 \\
 n_{\Gamma,2} & 1 & 2 & 0 & 0 \\
 n_{\Gamma,3} & 2 & 2 & 2 & 0 \\
 n_{X,1} & 3 & 4 & 3 & 0 \\
 n_{X,2} & 3 & 4 & 3 & 0 \\
 n_{M,1} & 3 & 4 & 2 & 2 \\
 n_{M,2} & 3 & 4 & 4 & -2 \\
 n_{R,1} & 1 & 2 & 1 & 0 \\
 n_{R,2} & 1 & 2 & 1 & 0 \\
 n_{R,3} & 1 & 1 & 1 & 0
 \end{pmatrix} \tag{219}$$

$$\begin{pmatrix}
 \text{SG219} & a_1 & a_2 & a_3 & a_4 \\
 \nu & 12 & 16 & 12 & 0 \\
 n_{\Gamma,1} & 1 & 2 & 2 & 0 \\
 n_{\Gamma,2} & 1 & 2 & 0 & 0 \\
 n_{\Gamma,3} & 2 & 2 & 2 & 0 \\
 n_{X,1} & 3 & 4 & 2 & 2 \\
 n_{X,2} & 3 & 4 & 4 & -2 \\
 n_{L,1} & 1 & 1 & 1 & 0 \\
 n_{L,2} & 1 & 1 & 1 & 0 \\
 n_{L,3} & 2 & 3 & 2 & 0 \\
 n_{W,1} & 3 & 4 & 3 & 0 \\
 n_{W,2} & 3 & 4 & 3 & 0 \\
 n_{W,3} & 3 & 4 & 3 & 0 \\
 n_{W,4} & 3 & 4 & 3 & 0
 \end{pmatrix} \tag{220}$$

$$\begin{pmatrix}
 \text{SG220} & a_1 & a_2 & a_3 \\
 \nu & 24 & 28 & -16 \\
 n_{\Gamma,1} & 2 & 3 & -2 \\
 n_{\Gamma,2} & 2 & 3 & -2 \\
 n_{\Gamma,3} & 4 & 4 & -2 \\
 n_{H,1} & 2 & 3 & -2 \\
 n_{H,2} & 2 & 3 & -2 \\
 n_{H,3} & 4 & 4 & -2 \\
 n_{P,1} & 1 & 1 & 0 \\
 n_{P,2} & 1 & 0 & 0 \\
 n_{P,3} & 2 & 3 & -2 \\
 n_{P,4} & 3 & 4 & -2 \\
 n_{P,5} & 3 & 3 & -2 \\
 n_{N,1} & 6 & 7 & -4 \\
 n_{N,2} & 6 & 7 & -4 \\
 n_{N,3} & 6 & 7 & -4 \\
 n_{N,4} & 6 & 7 & -4
 \end{pmatrix} \tag{221}$$

$$\begin{pmatrix}
 \text{SG221} & a_1 & a_2 & a_3 & a_4 & a_5 & a_6 & a_7 & a_8 & a_9 & a_{10} & a_{11} & a_{12} & a_{13} & a_{14} \\
 \nu & 24 & 8 & 12 & 12 & 6 & 6 & 6 & 6 & 2 & -44 & -78 & 2 & 144 & -64 \\
 n_{\Gamma,1} & 1 & 0 & 1 & 1 & 1 & 0 & 1 & 0 & 1 & -6 & -9 & 1 & 16 & -8 \\
 n_{\Gamma,2} & 1 & 0 & 0 & 0 & 0 & 1 & 0 & 1 & 0 & -4 & -6 & 0 & 12 & -8 \\
 n_{\Gamma,3} & 2 & 1 & 1 & 1 & 1 & 1 & 1 & 1 & 0 & -6 & -9 & 0 & 16 & -8 \\
 n_{\Gamma,4} & 1 & 0 & 1 & 1 & 0 & 0 & 0 & 0 & 0 & 0 & -2 & 0 & 4 & 0 \\
 n_{\Gamma,5} & 1 & 0 & 0 & 0 & 0 & 0 & 0 & 0 & 0 & 0 & 0 & 0 & 0 & 0 \\
 n_{\Gamma,6} & 2 & 1 & 1 & 1 & 0 & 0 & 0 & 0 & 0 & 0 & -2 & 0 & 4 & 0 \\
 n_{X,1} & 3 & 1 & 2 & 2 & 1 & 1 & 1 & 0 & 0 & -6 & -11 & 1 & 20 & -8 \\
 n_{X,2} & 3 & 1 & 1 & 1 & 1 & 0 & 1 & 0 & 0 & -5 & -8 & 0 & 16 & -8 \\
 n_{X,3} & 3 & 1 & 2 & 2 & 1 & 0 & 1 & 1 & 1 & -6 & -11 & 0 & 20 & -8 \\
 n_{X,4} & 3 & 1 & 1 & 1 & 0 & 1 & 1 & 1 & 0 & -5 & -9 & 0 & 16 & -8 \\
 n_{M,1} & 3 & 1 & 1 & 2 & 1 & 0 & 0 & 1 & 0 & -5 & -9 & 1 & 16 & -8 \\
 n_{M,2} & 3 & 1 & 2 & 1 & 0 & 1 & 1 & 0 & 1 & -5 & -8 & 0 & 16 & -8 \\
 n_{M,3} & 3 & 1 & 1 & 2 & 1 & 1 & 1 & 0 & 0 & -6 & -11 & 0 & 20 & -8 \\
 n_{M,4} & 3 & 1 & 2 & 1 & 1 & 1 & 1 & 0 & 0 & -6 & -11 & 0 & 20 & -8 \\
 n_{R,1} & 1 & 0 & 0 & 1 & 0 & 0 & 0 & 1 & 0 & -5 & -7 & 1 & 12 & -8 \\
 n_{R,2} & 1 & 0 & 1 & 0 & 0 & 0 & 1 & 0 & 0 & 0 & -2 & 0 & 4 & 0 \\
 n_{R,3} & 2 & 1 & 1 & 1 & 0 & 0 & 1 & 1 & 0 & -1 & -5 & 0 & 8 & 0 \\
 n_{R,4} & 1 & 0 & 0 & 1 & 1 & 0 & 0 & 0 & 0 & 0 & -2 & 0 & 4 & 0 \\
 n_{R,5} & 1 & 0 & 1 & 0 & 0 & 1 & 0 & 0 & 1 & -5 & -6 & 0 & 12 & -8 \\
 n_{R,6} & 2 & 1 & 1 & 1 & 1 & 1 & 0 & 0 & 0 & -5 & -6 & 0 & 12 & -8
 \end{pmatrix} \tag{222}$$

$$\begin{pmatrix}
 \text{SG222} & a_1 & a_2 & a_3 & a_4 & a_5 & a_6 \\
 \nu & 24 & 16 & 12 & 24 & 16 & -64 \\
 n_{\Gamma,1} & 1 & 1 & 1 & 2 & 2 & -8 \\
 n_{\Gamma,2} & 1 & 1 & 0 & 0 & 2 & -4 \\
 n_{\Gamma,3} & 2 & 1 & 1 & 2 & 2 & -4 \\
 n_{\Gamma,4} & 1 & 1 & 1 & 0 & 0 & 0 \\
 n_{\Gamma,5} & 1 & 1 & 0 & 2 & 0 & -4 \\
 n_{\Gamma,6} & 2 & 1 & 1 & 2 & 0 & -4 \\
 n_{X,1} & 3 & 2 & 2 & 3 & 2 & -8 \\
 n_{X,2} & 3 & 2 & 2 & 3 & 2 & -8 \\
 n_{X,3} & 3 & 2 & 1 & 3 & 2 & -8 \\
 n_{X,4} & 3 & 2 & 1 & 3 & 2 & -8 \\
 n_{M,1} & 6 & 4 & 3 & 6 & 4 & -16 \\
 n_{R,1} & 2 & 2 & 1 & 2 & 2 & -8 \\
 n_{R,2} & 2 & 1 & 1 & 2 & 1 & -4 \\
 n_{R,3} & 2 & 1 & 1 & 2 & 1 & -4
 \end{pmatrix} \tag{223}$$



$$\left( \begin{array}{c|cccccccc} \text{SG223} & a_1 & a_2 & a_3 & a_4 & a_5 & a_6 & a_7 & \\ \hline \nu & 24 & 16 & 12 & 12 & 12 & 4 & -64 & \\ n_{\Gamma,1} & 1 & 1 & 1 & 1 & 1 & 1 & -8 & \\ n_{\Gamma,2} & 1 & 1 & 0 & 0 & 1 & 1 & -4 & \\ n_{\Gamma,3} & 2 & 1 & 1 & 1 & 2 & 0 & -4 & \\ n_{\Gamma,4} & 1 & 1 & 0 & 0 & 0 & 0 & 0 & \\ n_{\Gamma,5} & 1 & 1 & 1 & 1 & 0 & 0 & -4 & \\ n_{\Gamma,6} & 2 & 1 & 1 & 1 & 0 & 0 & -4 & \\ n_{X,1} & 6 & 4 & 3 & 3 & 3 & 1 & -16 & \\ n_{M,1} & 3 & 2 & 2 & 1 & 1 & 1 & -8 & \\ n_{M,2} & 3 & 2 & 1 & 2 & 1 & 1 & -8 & \\ n_{M,3} & 3 & 2 & 1 & 2 & 2 & 0 & -8 & \\ n_{M,4} & 3 & 2 & 2 & 1 & 2 & 0 & -8 & \\ n_{R,1} & 2 & 2 & 1 & 1 & 1 & 1 & -8 & \\ n_{R,2} & 2 & 1 & 1 & 1 & 1 & 0 & -4 & \\ n_{R,3} & 2 & 1 & 1 & 1 & 1 & 0 & -4 & \end{array} \right) \quad (224)$$

$$\left( \begin{array}{c|cccccccc} \text{SG224} & a_1 & a_2 & a_3 & a_4 & a_5 & a_6 & a_7 & a_8 & \\ \hline \nu & 24 & 8 & 12 & -32 & 8 & -64 & 72 & -80 & \\ n_{\Gamma,1} & 1 & 0 & 1 & -2 & 1 & -3 & 4 & -4 & \\ n_{\Gamma,2} & 1 & 0 & 0 & -2 & 1 & -3 & 4 & -4 & \\ n_{\Gamma,3} & 2 & 1 & 1 & -4 & 1 & -9 & 10 & -12 & \\ n_{\Gamma,4} & 1 & 0 & 0 & 0 & 0 & 0 & 0 & 0 & \\ n_{\Gamma,5} & 1 & 0 & 1 & 0 & 0 & 0 & 0 & 0 & \\ n_{\Gamma,6} & 2 & 1 & 1 & -2 & 0 & -4 & 4 & -4 & \\ n_{X,1} & 6 & 2 & 3 & -8 & 2 & -16 & 18 & -20 & \\ n_{M,1} & 6 & 2 & 3 & -8 & 2 & -16 & 18 & -20 & \\ n_{R,1} & 1 & 0 & 0 & 0 & 0 & 1 & 0 & 0 & \\ n_{R,2} & 1 & 0 & 1 & -2 & 0 & -3 & 4 & -4 & \\ n_{R,3} & 2 & 1 & 1 & -3 & 0 & -5 & 6 & -8 & \\ n_{R,4} & 1 & 0 & 1 & -2 & 1 & -4 & 4 & -4 & \\ n_{R,5} & 1 & 0 & 0 & 0 & 1 & 0 & 0 & 0 & \\ n_{R,6} & 2 & 1 & 1 & -3 & 1 & -8 & 8 & -8 & \end{array} \right) \quad (225)$$

$$\left( \begin{array}{c|cccccccccccc} \text{SG225} & a_1 & a_2 & a_3 & a_4 & a_5 & a_6 & a_7 & a_8 & a_9 & a_{10} & a_{11} & \\ \hline \nu & 24 & 8 & 12 & 12 & 4 & 2 & 2 & 4 & 2 & -130 & -256 & \\ n_{\Gamma,1} & 1 & 0 & 1 & 1 & 1 & 1 & 0 & 0 & 1 & -13 & -24 & \\ n_{\Gamma,2} & 1 & 0 & 0 & 1 & 0 & 0 & 1 & 0 & 0 & -4 & -8 & \\ n_{\Gamma,3} & 2 & 1 & 1 & 2 & 0 & 0 & 0 & 1 & 0 & -12 & -24 & \\ n_{\Gamma,4} & 1 & 0 & 1 & 0 & 0 & 0 & 0 & 0 & 0 & -4 & -8 & \\ n_{\Gamma,5} & 1 & 0 & 0 & 0 & 1 & 0 & 0 & 0 & 0 & -4 & -8 & \\ n_{\Gamma,6} & 2 & 1 & 1 & 0 & 0 & 0 & 0 & 0 & 0 & -8 & -16 & \\ n_{X,1} & 3 & 1 & 2 & 1 & 0 & 1 & 0 & 1 & 1 & -21 & -40 & \\ n_{X,2} & 3 & 1 & 1 & 1 & 1 & 0 & 1 & 1 & 0 & -16 & -32 & \\ n_{X,3} & 3 & 1 & 2 & 2 & 1 & 0 & 0 & 0 & 0 & -16 & -32 & \\ n_{X,4} & 3 & 1 & 1 & 2 & 0 & 0 & 0 & 0 & 0 & -12 & -24 & \\ n_{L,1} & 2 & 1 & 1 & 1 & 0 & 0 & 0 & 0 & 0 & -8 & -16 & \\ n_{L,2} & 2 & 1 & 1 & 1 & 0 & 0 & 0 & 0 & 0 & -8 & -16 & \\ n_{L,3} & 4 & 1 & 2 & 2 & 1 & 0 & 0 & 0 & 1 & -20 & -40 & \\ n_{L,4} & 2 & 1 & 1 & 1 & 0 & 0 & 0 & 1 & 0 & -12 & -24 & \\ n_{L,5} & 2 & 1 & 1 & 1 & 0 & 0 & 0 & 1 & 0 & -12 & -24 & \\ n_{L,6} & 4 & 1 & 2 & 2 & 1 & 1 & 1 & 1 & 0 & -25 & -48 & \\ n_{W,1} & 6 & 2 & 3 & 3 & 1 & 1 & 0 & 1 & 0 & -32 & -64 & \\ n_{W,2} & 6 & 2 & 3 & 3 & 1 & 0 & 1 & 1 & 1 & -33 & -64 & \end{array} \right) \quad (226)$$

$$\begin{pmatrix}
 \text{SG226} & a_1 & a_2 & a_3 & a_4 & a_5 & a_6 & a_7 & a_8 \\
 \nu & 24 & 16 & 12 & 12 & -112 & 12 & 4 & -224 \\
 n_{\Gamma,1} & 1 & 1 & 1 & 2 & -9 & 1 & 1 & -16 \\
 n_{\Gamma,2} & 1 & 1 & 0 & 0 & -7 & 0 & 1 & -16 \\
 n_{\Gamma,3} & 2 & 1 & 1 & 2 & -8 & 1 & 0 & -16 \\
 n_{\Gamma,4} & 1 & 1 & 1 & 0 & -4 & 0 & 0 & -8 \\
 n_{\Gamma,5} & 1 & 1 & 0 & 0 & -4 & 1 & 0 & -8 \\
 n_{\Gamma,6} & 2 & 1 & 1 & 0 & -8 & 1 & 0 & -16 \\
 n_{X,1} & 3 & 2 & 2 & 2 & -13 & 1 & 1 & -24 \\
 n_{X,2} & 3 & 2 & 1 & 0 & -15 & 2 & 1 & -32 \\
 n_{X,3} & 3 & 2 & 2 & 2 & -16 & 2 & 0 & -32 \\
 n_{X,4} & 3 & 2 & 1 & 2 & -12 & 1 & 0 & -24 \\
 n_{L,1} & 2 & 1 & 1 & 1 & -8 & 1 & 0 & -16 \\
 n_{L,2} & 4 & 3 & 2 & 2 & -20 & 2 & 1 & -40 \\
 n_{L,3} & 4 & 3 & 2 & 2 & -20 & 2 & 1 & -40 \\
 n_{W,1} & 6 & 4 & 3 & 3 & -28 & 3 & 1 & -56 \\
 n_{W,2} & 6 & 4 & 3 & 3 & -28 & 3 & 1 & -56
 \end{pmatrix}
 \tag{227}$$

$$\begin{pmatrix}
 \text{SG227} & a_1 & a_2 & a_3 & a_4 & a_5 & a_6 & a_7 & a_8 \\
 \nu & 24 & 8 & 8 & 8 & -24 & 8 & 4 & -48 \\
 n_{\Gamma,1} & 1 & 0 & 0 & 1 & -2 & 1 & 1 & -4 \\
 n_{\Gamma,2} & 1 & 0 & 0 & 1 & -2 & 1 & 0 & -4 \\
 n_{\Gamma,3} & 2 & 1 & 2 & 1 & -4 & 1 & 0 & -8 \\
 n_{\Gamma,4} & 1 & 0 & 0 & 0 & 0 & 0 & 0 & 0 \\
 n_{\Gamma,5} & 1 & 0 & 0 & 0 & 0 & 0 & 1 & 0 \\
 n_{\Gamma,6} & 2 & 1 & 0 & 0 & 0 & 0 & 0 & 0 \\
 n_{X,1} & 6 & 2 & 2 & 2 & -6 & 2 & 1 & -12 \\
 n_{L,1} & 2 & 1 & 1 & 1 & -2 & 0 & 0 & -4 \\
 n_{L,2} & 2 & 1 & 1 & 1 & -2 & 0 & 0 & -4 \\
 n_{L,3} & 4 & 1 & 2 & 2 & -5 & 1 & 1 & -8 \\
 n_{L,4} & 2 & 1 & 1 & 0 & -2 & 1 & 0 & -4 \\
 n_{L,5} & 2 & 1 & 1 & 0 & -2 & 1 & 0 & -4 \\
 n_{L,6} & 4 & 1 & 0 & 1 & -3 & 2 & 1 & -8 \\
 n_{W,1} & 3 & 1 & 1 & 1 & -2 & 1 & 0 & -4 \\
 n_{W,2} & 3 & 1 & 1 & 1 & -2 & 1 & 0 & -4 \\
 n_{W,3} & 3 & 1 & 1 & 1 & -4 & 1 & 1 & -8 \\
 n_{W,4} & 3 & 1 & 1 & 1 & -4 & 1 & 1 & -8 \\
 n_{W,5} & 6 & 2 & 2 & 2 & -6 & 2 & 1 & -12
 \end{pmatrix}
 \tag{228}$$

$$\begin{pmatrix} \text{SG228} & a_1 & a_2 & a_3 & a_4 & a_5 \\ \nu & 24 & 16 & 24 & 16 & -64 \\ n_{\Gamma,1} & 1 & 1 & 2 & 2 & -8 \\ n_{\Gamma,2} & 1 & 1 & 0 & 2 & -4 \\ n_{\Gamma,3} & 2 & 1 & 2 & 2 & -4 \\ n_{\Gamma,4} & 1 & 1 & 0 & 0 & 0 \\ n_{\Gamma,5} & 1 & 1 & 2 & 0 & -4 \\ n_{\Gamma,6} & 2 & 1 & 2 & 0 & -4 \\ n_{X,1} & 6 & 4 & 6 & 4 & -16 \\ n_{L,1} & 2 & 1 & 2 & 1 & -4 \\ n_{L,2} & 4 & 3 & 4 & 3 & -12 \\ n_{L,3} & 4 & 3 & 4 & 3 & -12 \\ n_{W,1} & 3 & 2 & 3 & 2 & -8 \\ n_{W,2} & 3 & 2 & 3 & 2 & -8 \\ n_{W,3} & 3 & 2 & 3 & 2 & -8 \\ n_{W,4} & 3 & 2 & 3 & 2 & -8 \\ n_{W,5} & 3 & 2 & 3 & 2 & -8 \end{pmatrix} \tag{229}$$

$$\begin{pmatrix} \text{SG229} & a_1 & a_2 & a_3 & a_4 & a_5 & a_6 & a_7 & a_8 & a_9 & a_{10} & a_{11} \\ \nu & 24 & 8 & 12 & 12 & -360 & 8 & 6 & 6 & 2 & 204 & -256 \\ n_{\Gamma,1} & 1 & 0 & 1 & 1 & -34 & 1 & 1 & 0 & 1 & 18 & -24 \\ n_{\Gamma,2} & 1 & 0 & 0 & 0 & -10 & 1 & 0 & 1 & 0 & 4 & -8 \\ n_{\Gamma,3} & 2 & 1 & 1 & 1 & -32 & 1 & 1 & 1 & 0 & 16 & -24 \\ n_{\Gamma,4} & 1 & 0 & 1 & 0 & -12 & 0 & 0 & 0 & 0 & 8 & -8 \\ n_{\Gamma,5} & 1 & 0 & 0 & 1 & -12 & 0 & 0 & 0 & 0 & 8 & -8 \\ n_{\Gamma,6} & 2 & 1 & 1 & 1 & -24 & 0 & 0 & 0 & 0 & 16 & -16 \\ n_{H,1} & 1 & 0 & 1 & 0 & -23 & 0 & 1 & 0 & 1 & 12 & -16 \\ n_{H,2} & 1 & 0 & 0 & 1 & -11 & 0 & 0 & 1 & 0 & 6 & -8 \\ n_{H,3} & 2 & 1 & 1 & 1 & -23 & 0 & 1 & 1 & 0 & 12 & -16 \\ n_{H,4} & 1 & 0 & 1 & 1 & -23 & 1 & 0 & 0 & 0 & 14 & -16 \\ n_{H,5} & 1 & 0 & 0 & 0 & -11 & 1 & 0 & 0 & 0 & 6 & -8 \\ n_{H,6} & 2 & 1 & 1 & 1 & -33 & 1 & 0 & 0 & 0 & 20 & -24 \\ n_{P,1} & 2 & 0 & 1 & 1 & -34 & 1 & 1 & 0 & 0 & 20 & -24 \\ n_{P,2} & 2 & 0 & 1 & 1 & -34 & 1 & 0 & 1 & 1 & 18 & -24 \\ n_{P,3} & 4 & 2 & 2 & 2 & -56 & 1 & 1 & 1 & 0 & 32 & -40 \\ n_{N,1} & 6 & 2 & 3 & 3 & -90 & 2 & 1 & 1 & 1 & 52 & -64 \\ n_{N,2} & 6 & 2 & 3 & 3 & -90 & 2 & 2 & 2 & 0 & 50 & -64 \end{pmatrix} \tag{230}$$

$$\begin{pmatrix}
 \text{SG230} & a_1 & a_2 & a_3 & a_4 & a_5 \\
 \nu & 24 & 16 & 24 & 16 & -64 \\
 n_{\Gamma,1} & 1 & 1 & 2 & 2 & -8 \\
 n_{\Gamma,2} & 1 & 1 & 0 & 2 & -4 \\
 n_{\Gamma,3} & 2 & 1 & 2 & 2 & -4 \\
 n_{\Gamma,4} & 1 & 1 & 0 & 0 & 0 \\
 n_{\Gamma,5} & 1 & 1 & 2 & 0 & -4 \\
 n_{\Gamma,6} & 2 & 1 & 2 & 0 & -4 \\
 n_{\text{H},1} & 2 & 2 & 2 & 2 & -8 \\
 n_{\text{H},2} & 2 & 1 & 2 & 1 & -4 \\
 n_{\text{H},3} & 2 & 1 & 2 & 1 & -4 \\
 n_{\text{P},1} & 1 & 0 & 1 & 0 & 0 \\
 n_{\text{P},2} & 1 & 0 & 1 & 0 & 0 \\
 n_{\text{P},3} & 2 & 2 & 2 & 2 & -8 \\
 n_{\text{P},4} & 3 & 2 & 3 & 2 & -8 \\
 n_{\text{P},5} & 3 & 2 & 3 & 2 & -8 \\
 n_{\text{N},1} & 6 & 4 & 6 & 4 & -16 \\
 n_{\text{N},2} & 6 & 4 & 6 & 4 & -16
 \end{pmatrix} \tag{231}$$

## VI. WEBSITE FOR BAND STRUCTURES

The band structures computed for all of the discovered topological materials candidates can be found on the following website:

[ccmp.nju.edu.cn](http://ccmp.nju.edu.cn)

While the materials are grouped by their topological diagnosis and space groups, the database is also searchable. However, in searching one has to pay special attention to the naming convention adopted. For instance, the entry for  $\text{Na}_3\text{Bi}$  can be found by any one of the following search prompts:

- “Bi1Na3”
- “Bi Na”
- “Na Bi”

Note, however, the prompts “Na3Bi”, “Na3Bi1”, and “BiNa3” will not return the correct result.

- 
- [1] H. Po, A. Vishwanath, and H. Watanabe, *Nature Communications* **8**, 50 (2017).  
[2] F. Tang, H. Po, A. Vishwanath, and X. Wan, arXiv: 1805.07314 (2018).  
[3] Z. Song, T. Zhang, Z. Fang, and C. Fang, arXiv:1711.11049 (2017).  
[4] A. Yamakage, Y. Yamakawa, Y. Tanaka, and Y. Okamoto, *Journal of the Physical Society of Japan* **85**, 013708 (2015).  
[5] R. Fischer and B. Müller, *Zeitschrift für anorganische und allgemeine Chemie* **628**, 2592 (2002).  
[6] W. Bauhofer, M. Wittmann, and H. Schnering, *Journal of Physics and Chemistry of Solids* **42**, 687 (1981).  
[7] Y. Quan, Z. Yin, and W. Pickett, *Physical review letters* **118**, 176402 (2017).  
[8] J. F. Brice, A. Courtois, and P. Laffitte, *Comptes Rendus Hebdomadaires des Seances de l’Academie des Sciences, Serie C, Sciences Chimiques* (1966-) **283**, 479 (1976).  
[9] Q. Xu, R. Yu, Z. Fang, X. Dai, and H. Weng, *Physical Review B* **95**, 045136 (2017).  
[10] P. Malinowski, M. Derzsi, Z. Mazej, Z. Jaglicic, B. Gawel, W. Lasocha, and W. Grochala, *Angewandte Chemie. International Edition* **49**, 1683 (2010).  
[11] M. Ströbele and H.-J. Meyer, *Russian Journal of Coordination Chemistry* **38**, 178 (2012).  
[12] F. Kubel and K. Yvon, *Solid state communications* **72**, 1219 (1989).  
[13] W. Dahlmann and H. Schnering, *Naturwissenschaften* **60**, 518 (1973).  
[14] A. Hermann, B. L. Ivanov, N. W. Ashcroft, and R. Hoffmann, *Physical Review B* **86**, 014104 (2012).  
[15] K. Deller and B. Eisenmann, *Zeitschrift fuer Anorganische und Allgemeine Chemie* (1950) (DE) **425**, 104 (1976).

- [16] Y. Prots, R. Demchyna, U. Burkhardt, and U. Schwarz, *Zeitschrift für Kristallographie* **222**, 513 (2007).
- [17] L. Brattas and A. Kjekshus, *Acta Chemica Scandinavica* **26**, 3441 (1972).
- [18] W. Schutte, F. Disselborg, and J. De Boer, *Acta Crystallographica Section B* **49**, 787 (1993).
- [19] F. Kadijk, R. Huisman, and F. Jellinek, *Acta Crystallographica Section B* **24**, 1102 (1968).
- [20] Y. Ma, Y. Jing, and T. Heine, *2D Materials* **4**, 025111 (2017).
- [21] W. Bronger and C. Burschka, *Zeitschrift für anorganische und allgemeine Chemie* **425**, 109 (1976).
- [22] M. Wendorff and C. Roehr, *Zeitschrift Fr Naturforschung B* **62**, 1071 (2007).
- [23] K. Schubert, H. G. Meissner, A. Raman, and W. Rossteutscher, *Naturwissenschaften* **51**, 287 (1964).
- [24] W. Bauhofer, M. Wittmann, and H. Schnering, *Journal of Physics and Chemistry of Solids* **42**, 687 (1981).
- [25] K. Deller and B. Eisenmann, *Zeitschrift Fr Naturforschung B* **31**, 1550 (2014).
- [26] W. Jeitschko and M. Moeller, *Acta Crystallographica* **35**, 573 (1979).
- [27] K. Deller and B. Eisenmann, *Cheminform* **9**, 676 (1978).
- [28] B. Saparov, H. He, X. Zhang, R. Greene, and S. Bobev, *Dalton Trans* **39**, 1063 (2010).
- [29] T. Hansen and H. Müller-Buschbaum, *Zeitschrift für anorganische und allgemeine Chemie* **616**, 67 (1992).
- [30] S. Bobev and S. C. Sevov, *Cheminform* **338**, 87 (2002).
- [31] J. C. Dai, S. Gupta, and J. D. Corbett, *Inorganic Chemistry* **50**, 238 (2011).
- [32] S.-Q. Xia and S. Bobev, *Inorganic chemistry* **45**, 7126 (2006).
- [33] P. Berlepsch, T. Armbruster, E. Makovicky, T. Dan, and S. Graeser, *Canadian Mineralogist* **39**, 1653 (2001).
- [34] A. Olvera, G. Shi, H. Djieutedjeu, A. Page, C. Uher, E. Kioupakis, and P. F. Poudeu, *Inorganic chemistry* **54**, 746 (2014).
- [35] P. Heines, H. Keller, M. Armbruster, U. Schwarz, and J. Tse, *Inorganic Chemistry* **45**, 9818 (2006).
- [36] R. Jha, B. Tiwari, P. Rani, H. Kishan, and V. Awana, *Journal of Applied Physics* **115**, 213903 (2014).
- [37] D. A. Keszler, P. J. Squattrito, N. E. Brese, J. A. Ibers, M. Shang, and L. U. Jiaxi, *Inorganic Chemistry* **24**, 3063 (1985).
- [38] W. Dahlmann and H. G. V. Schnering, *Naturwissenschaften* **60**, 429 (1973).
- [39] S. A. Sunshine and J. A. Ibers, *Inorganic Chemistry* **25**, 4355 (1986).
- [40] A. van der Lee and J. de Boer, *Acta Crystallographica, Section C: Crystal Structure Communications* **49**, 1444 (1993).
- [41] W. Zhang, R. Yu, W. Feng, Y. Yao, H. Weng, X. Dai, and Z. Fang, *Phys. Rev. Lett.* **106**, 156808 (2011).
- [42] E. Schulz Lang, U. Abram, and J. Straehle, *Zeitschrift fuer Anorganische und Allgemeine Chemie (1950) (DE)* **623**, 1791 (1997).
- [43] H. Diercks and B. Krebs, *Angewandte Chemie (Edition international)* **16**, 313 (1977).
- [44] S. Sirotkin, V. Sirotkin, and V. Trunov, *Zhurnal Neorganicheskoi Khimii* **35**, 1609 (1990).
- [45] W. Jeitschko and P. Donohue, *Acta Crystallographica B (24,1968-38,1982)* **28**, 1893 (1972).
- [46] K. Tanaka, T. Nasu, Y. Miyamoto, N. Ozaki, S. Tanaka, T. Nagata, F. Hakoe, M. Yoshikiyo, K. Nakagawa, Y. Umeta, K. Imoto, H. Tokoro, A. Namai, and S.-i. Ohkoshi, *Crystal Growth and Design* **15**, 653 (2015).
- [47] T. Chattopadhyay and K. Schubert, *Journal of the Less Common Metals* **45**, 79 (1976).
- [48] H. Haendler, D. Mootz, A. Rabenau, and G. Rosenstein, *Journal of Solid State Chemistry* **10**, 175 (1974).
- [49] B. Li, S.-J. Kim, G. J. Miller, and J. D. Corbett, *Inorganic chemistry* **48**, 6573 (2009).
- [50] Z.-M. Sun, J.-G. Mao, and D.-C. Pan, *Journal of alloys and compounds* **421**, 190 (2006).
- [51] F. Hulliger, *Nature* **204**, 991 (1964).
- [52] Y. G. G. Yu and N. Ross, *Journal of Physics: Condensed Matter* **23**, 055401 (2011).
- [53] W. Burkhardt and K. Schubert, *Zeitschrift Fur Metallkunde* **50**, 442 (1959).
- [54] U. Zachwieja, J. Müller, and J. Wlodarski, *Zeitschrift für anorganische und allgemeine Chemie* **624**, 853 (1998).
- [55] L. M. Schoop, L. S. Xie, R. Chen, Q. D. Gibson, S. H. Lapidus, I. Kimchi, M. Hirschberger, N. Haldolaarachchige, M. N. Ali, C. A. Belvin, *et al.*, *Physical Review B* **91**, 214517 (2015).
- [56] S. Filatov, N. Bendeliani, B. Albert, J. Kopf, T. Dyuzeva, and L. Lityagina, *Solid state sciences* **7**, 1363 (2005).
- [57] B. Krenkel, C. Tiburtius, and H. U. Schuster, *Zeitschrift Fr Naturforschung B* **34**, 1686 (1979).
- [58] S. Rundqvist, B. Carlsson, B. Olofsson, and P. H. Nielsen, *Acta Chemica Scandinavica* **22**, 2395 (1968).
- [59] P. E. Blanchard, R. G. Cavell, and A. Mar, *Journal of Alloys and Compounds* **505**, 17 (2010).
- [60] F. Kabir, M. M. Hosen, G. Dhakal, K. Dimitri, T.-R. Chang, C. Sims, H. Lin, T. Durakiewicz, D. Kaczorowski, and M. Neupane, *Bulletin of the American Physical Society* (2018).
- [61] K. Guttsche, A. Rosin, M. Wendorff, and C. Roehr, *Zeitschrift fuer Naturforschung, B: Chemical Sciences* **61**, 846 (2006).
- [62] Y. Imai, Y. Mori, S. Nakamura, and K. I. Takarabe, *Journal of Alloys and Compounds* **590**, 579 (2014).
- [63] Z. Zhu, M. Li, and J. Li, *Physical Review B* **94**, 155121 (2016).
- [64] A. Velden and M. J. Dr, *Zeitschrift Fr Anorganische Und Allgemeine Chemie* **630**, (2010).
- [65] F. Merlo, M. Pani, and M. L. Fornasini, *Journal of the Less Common Metals* **171**, 145 (1991).
- [66] G. Savelsberg and H. Schaefer, *Chemischer Informationsdienst* **9** (1978).
- [67] B. Yan, L. Muehler, and C. Felser, *Physical review letters* **109**, 116406 (2012).
- [68] N. H. Dung, *Acta Crystallographica* **29**, 2095C2097 (1973).
- [69] Y. Nagata, K. Sodeyama, S. Yashiro, H. Sasaki, H. Samata, T. Uchida, and M. D. Lan, *Journal of Alloys and Compounds* **281**, 112 (1998).
- [70] B. Singh, X. Zhou, H. Lin, and A. Bansil, *Physical Review B* **97**, 075125 (2018).
- [71] Y. P. Yarmolyuk and E. I. Gladishevskii, **36**, 1030 (1974).

- [72] V. Johnson and W. Jeitschko, *Journal of Solid State Chemistry* **4**, 123 (1972).
- [73] J. Lian, L. Yu, Q.-F. Liang, J. Zhou, R. Yu, and H. Weng, arXiv preprint arXiv:1807.06247 (2018).
- [74] S. V. Ackerbauer, R. Gumeniuk, Y. Prots, H. Borrmann, F. Weitzer, and A. Leithejasper, *Zeitschrift fr Kristallographie - New Crystal Structures* **225**, 7 (2010).
- [75] E. Ganglberger, H. Nowotny, and F. Benesovsky, *Monatshefte Fr Chemie Und Verwandte Teile Anderer Wissenschaften* **98**, 95 (1967).
- [76] J. G. Mao, Z. Xu, and A. M. Guloy, *Inorganic Chemistry* **40**, 4472 (2001).
- [77] A. Brown, *Nature* **206**, 502 (1965).
- [78] S. Popova, *Fizika Tekhnika Vysokikh Davlenij* **11**, 3 (1983).
- [79] G. A. Marking and H. F. Franzen, *Journal of Alloys and Compounds* **204**, L17CL20 (1994).
- [80] F. Hulliger, *Nature* **204**, 775 (1964).
- [81] H. Sprenger, *Journal of The Less-Common Metals* **34**, 39 (1974).
- [82] O. V. Yakubovich, I. V. Perevoznikova, and O. V. Dimitrova, *Doklady Physics* **47**, 791 (2002).
- [83] A. Salamat, K. Woodhead, S. I. Shah, A. L. Hector, and P. F. Mcmillan, *Chemical Communications* **50**, 10041 (2014).
- [84] A. Imre and A. Mewis, *Cheminform* **38**, 1153 (2007).
- [85] M. Huber and H. J. Deiseroth, *Zeitschrift Fr Kristallographie* **209**, 370 (1994).
- [86] P. Snell, *Acta Chem Scand* **22**, 1942 (1968).
- [87] G. Bruzzone and E. Franceschi, *Journal of the Less Common Metals* **57**, 201 (1978).
- [88] Y. Sun, X.-Q. Chen, C. Franchini, D. Li, S. Yunoki, Y. Li, and Z. Fang, *Physical Review B* **84**, 165127 (2011).
- [89] V. Johnson and W. Jeitschko, *Journal of Solid State Chemistry* **4**, 123 (1972).
- [90] S. V. Ackerbauer, R. Gumeniuk, Y. Prots, H. Borrmann, F. Weitzer, and A. Leithejasper, *Zeitschrift fr Kristallographie - New Crystal Structures* **225**, 7 (2010).
- [91] E. Brechtel, G. Cordier, and H. Schaefer, *Zeitschrift Fr Naturforschung B* **34**, 251 (1979).
- [92] K. Wang, L. Wang, D. Graf, and C. Petrovic, in *APS March Meeting Abstracts* (2013).
- [93] S. Brutti, D. Nguyen-Manh, and D. G. Pettifor, *Journal of Alloys and Compounds* **457**, 29 (2008).
- [94] S. V. Ackerbauer, R. Gumeniuk, Y. Prots, H. Borrmann, F. Weitzer, and A. Leithejasper, *Zeitschrift fr Kristallographie - New Crystal Structures* **225**, 7 (2010).
- [95] F. Hulliger, *Journal of Alloys and Compounds* **196**, 225 (1993).
- [96] E. Hovestreydt, N. Engel, K. Klepp, B. Chabot, and E. Parthe, *Journal of the Less-Common Metals* **85**, 247 (1982).
- [97] A. Imre and A. Mewis, *Zeitschrift fuer Naturforschung, B: Chemical Sciences* **62**, 1153 (2007).
- [98] R. E. Marsh, *Journal of Solid State Chemistry* **102**, 283 (1993).
- [99] M. Ade and H. Hillebrecht, *Inorganic chemistry* **54**, 6122 (2015).
- [100] S. Yamanaka, M. Kajiyama, S. N. Sivakumar, and H. Fukuoka, *High Pressure Research* **24**, 481 (2004).
- [101] H. Haendler, D. Mootz, A. Rabenau, and G. Rosenstein, *Journal of Solid State Chemistry* **10**, 175 (1974).
- [102] S. Mikhaleenko, N. Chaban, and B. Kuz'ma Yu, *Inorg. Mater.* **28**, 1700 (1992).
- [103] I. M. Kurylyshyn, T. F. Fässler, A. Fischer, C. Hauf, G. Eickerling, M. Presnitz, and W. Scherer, *Angewandte Chemie International Edition* **53**, 3029 (2014).
- [104] M. de Koning, A. Antonelli, and D. A. C. Jara, *Physical Review B* **80**, 045209 (2009).
- [105] F. Cheviré and F. J. Disalvo, *Acta Crystallographica Section E: Structure Reports Online* **63**, i62 (2007).
- [106] W. Xing, X.-Q. Chen, D. Li, Y. Li, C. L. Fu, S. Meschel, and X. Ding, *Intermetallics* **28**, 16 (2012).
- [107] H. Fjellvåg and A. Kjekshus, *Solid State Communications* **60**, 91 (1986).
- [108] H. Weng, X. Dai, and Z. Fang, *Physical review X* **4**, 011002 (2014).
- [109] A. Leineweber and H. Jacobs, *Journal of Alloys and Compounds* **278**, L10 (278).
- [110] I. Duerr, B. Bauer, and C. Roehr, *Zeitschrift fuer Naturforschung, B: Chemical Sciences* **66**, 1107 (2011).
- [111] A. Dwight, J. Downey, and R. Conner, *Acta Crystallographica (1,1948-23,1967)* **23**, 860 (1967).
- [112] V. Pavlyuk, O. Bodak, V. Pecharskii, R. Skolozdra, and E. Gladyshevskii, *Inorganic Materials* **25**, 962 (1989).
- [113] P. Smith, A. Leadbetter, and A. Apling, *Philosophical Magazine* **31**, 57 (1975).
- [114] A. Saengdeejing, Y. Wang, and Z. Liu, *Physica C: Superconductivity* **471**, 553 (2011).
- [115] K. Cenzual, L. M. Gelato, M. Penzo, and E. Parthé, *Acta Crystallographica Section B* **47**, 433 (1991).
- [116] F. Zürcher and R. Nesper, *Angewandte Chemie International Edition* **37**, 3314 (1998).
- [117] R. Macaluso, S. Nakatsuji, K. Kuga, E. Thomas, Y. Machida, Y. Maeno, Z. Fisk, and J.-Y. Chan, *Jinlin Daxue Ziran Kexue Xuebao* **19**, 1918 (2007).
- [118] F. Weitzer, K. Hiebl, and P. Rogl, *Jinlin Daxue Ziran Kexue Xuebao* **98**, 291 (1992).
- [119] O. Levy, G. L. Hart, and S. Curtarolo, *Physical Review B* **81**, 174106 (2010).
- [120] F. Q. Huang, C. Flaschenriem, P. Brazis, C. R. Kannewurf, and J. A. Ibers, *Inorganic chemistry* **42**, 3194 (2003).
- [121] H. Putz, J. Schön, and M. Jansen, *Zeitschrift für anorganische und allgemeine Chemie* **625**, 1624 (1999).
- [122] K. Aurivillius, *Arkiv foer Kemi* **28**, 279 (1968).
- [123] M. He, A. Simon, and V. Duppel, *Zeitschrift für Naturforschung B* **60**, 284 (2005).
- [124] M. He, A. Simon, and V. Duppel, *Zeitschrift für anorganische und allgemeine Chemie* **630**, 535 (2004).
- [125] H. Sodeck, H. Mikler, and K. L. Komarek, *Monatshefte für Chemie/Chemical Monthly* **110**, 1 (1979).
- [126] Z. Johan and P. Picot, *Bull. Mineral* **105**, 229 (1982).
- [127] Y. Yu, B. Zhao, S. Zhu, T. Gao, H. Hou, and Z. He, *Physica B: Condensed Matter* **417**, 83 (2013).
- [128] A. Vaipolin, *Fizika Tverdogo Tela* **15**, 1430 (1973).

- [129] I. Kozhina and A. Borshchevskii, High-temperature X-Ray research on A (2) B (4) C (5) 2 compounds Transl. into ENGLISH from Vestn, Leningrad. Univ.(USSR) v. 22, no. 4, 1971 p 87-92 (1974).
- [130] A. Continenza, S. Massidda, A. Freeman, T. De Pascale, F. Meloni, and M. Serra, Physical Review B **46**, 10070 (1992).
- [131] F. Zuercher, S. Wengert, and R. Nesper, Inorganic Chemistry **38**, 4567 (1999).
- [132] W. Zhang, A. R. Oganov, A. F. Goncharov, Q. Zhu, S. E. Boulfelfel, A. O. Lyakhov, E. Stavrou, M. Somayazulu, V. B. Prakapenka, and Z. Konopkova, Science **342**, 1502 (2013).
- [133] H. Klesnar and P. Rogl, High Temperatures. High Pressures **22**, 453 (1990).
- [134] I. Chung, J.-H. Song, J. Im, J. Androulakis, C. D. Malliakas, H. Li, A. J. Freeman, J. T. Kenney, and M. G. Kanatzidis, Journal of the American Chemical Society **134**, 8579 (2012).
- [135] H. Jin, J. Im, and A. J. Freeman, Physical Review B **86**, 121102 (2012).
- [136] R. Gohle and K. Schubert, ZEITSCHRIFT FUR METALLKUNDE **55**, 503 (1964).
- [137] K. Kato, I. Kawada, C. Oshima, and S. Kawai, Acta Crystallographica B (24,1968-38,1982) **30**, 2933 (1974).
- [138] Z. Fisk, A. Cooper, P. Schmidt, and R. Castellano, Materials Research Bulletin **7**, 285 (1972).
- [139] K. Schubert, K. Frank, R. Gohle, A. Maldonado, H. Meissner, A. Raman, and W. Rossteutscher, Naturwissenschaften **50**, 41 (1963).
- [140] M. E. Eanes, G. L. Schimek, and J. W. Kolis, Journal of chemical crystallography **30**, 223 (2000).
- [141] J. Li, H.-Y. Guo, X. Zhang, and M. G. Kanatzidis, Journal of alloys and compounds **218**, 1 (1995).
- [142] K. Zhang, H. Zhao, and Y. Zhou, Journal of the Less Common Metals **138**, 173 (1988).
- [143] N. Nasir, N. Melnychenko-Koblyuk, A. Grytsiv, P. Rogl, G. Giester, J. Wosik, and G. E. Nauer, Journal of Solid State Chemistry **183**, 565 (2010).
- [144] B. Eisenmann, N. May, W. Mueller, H. Schaefer, A. Weiss, J. Winter, and G. Ziegler, Zeitschrift fuer Naturforschung, Teil B. Anorganische Chemie, Organische Chemie (2,1947-32,1977) **25**, 1350 (1970).
- [145] N. May and H. Schaefer, Zeitschrift fuer Naturforschung, Teil B. Anorganische Chemie, Organische Chemie (2,1947-32,1977) **27**, 864 (1972).
- [146] W. Dörrscheidt, N. Niess, and H. Schäfer, Zeitschrift für Naturforschung B **31**, 890 (1976).
- [147] H. Kohlmann and C. Ritter, Zeitschrift für anorganische und allgemeine Chemie **635**, 1573 (2009).
- [148] J. Belošević-Čavor, V. Koteski, and J. Radaković, Solid State Communications **152**, 1072 (2012).
- [149] B. Kotur and G. Ratush, Inorganic materials **27**, 422 (1991).
- [150] H. Nowotny, O. Schob, and F. Benesovsky, Monatshefte für Chemie und verwandte Teile anderer Wissenschaften **92**, 1300 (1961).
- [151] J. Donaldson, A. Kjekshus, D. Nicholson, and T. Rakke, Journal of the Less Common Metals **41**, 255 (1975).
- [152] R. Nesper and F. Zürcher, Zeitschrift für Kristallographie-New Crystal Structures **214**, 19 (1999).
- [153] G. Bruzzone, E. Franceschi, and F. Merlo, Journal of the Less Common Metals **60**, 59 (1978).
- [154] S. Kabalkina, S. Popova, N. Serebryanaya, and L. Vereshchagin, in *Soviet Physics Doklady*, Vol. 8 (1964) p. 972.
- [155] S. Jaulmes, H. W. Shu, and A. Mazurier, Acta Crystallographica Section C **43**, 2268 (1987).
- [156] H. W. Shu, S. Jaulmes, and J. Flahaut, Journal of Solid State Chemistry **74**, 277 (1988).
- [157] S.-J. Kim and T. F. Fässler, Zeitschrift für Kristallographie-New Crystal Structures **223**, 325 (2008).
- [158] S. M. Young, S. Manni, J. Shao, P. C. Canfield, and A. N. Kolmogorov, Physical Review B **95**, 085116 (2017).
- [159] E. Makarov and K. Tobelko, in *Dokl. Akad. Nauk SSSR*, Vol. 275 (1984) pp. 91–93.
- [160] I. Grund, H.-U. Schuster, and P. Müller, Zeitschrift für anorganische und allgemeine Chemie **515**, 151 (1984).
- [161] M. Sedighi, B. A. Nia, H. Zarringhalam, and R. Moradian, The European Physical Journal-Applied Physics **61**, 10103 (2013).
- [162] X. Zhang, L. Jin, X. Dai, and G. Liu, The journal of physical chemistry letters **8**, 4814 (2017).
- [163] A. Agaev, K.A.and Talybov and S. Semiletov, Kristallografiya **11**, 736 (1966).
- [164] I. Silkin, Y. M. Koroteev, S. Eremeev, G. Bihlmayer, and E. V. Chulkov, JETP letters **94**, 217 (2011).
- [165] B. A. Kuropatwa and H. Kleinke, Zeitschrift für anorganische und allgemeine Chemie **638**, 2640 (2012).
- [166] A. Skripov, H. Wu, T. Udovic, Q. Huang, R. Hempelmann, A. Soloninin, A. Rempel, and A. Gusev, Journal of Alloys and Compounds **478**, 68 (2009).
- [167] F. Lissner and T. Schleid, Zeitschrift für Kristallographie-New Crystal Structures **216**, 351 (2001).
- [168] S. B. Hendricks and H. E. Merwin, American Journal of Science **15**, 487 (1928).
- [169] H. Boudierba, Y. Djaballah, A. Belgacem-Bouzida, and R. Beddiaf, Intermetallics **28**, 108 (2012).
- [170] H. Huang, J. Liu, D. Vanderbilt, and W. Duan, Physical Review B **93**, 201114 (2016).
- [171] S. Brutti, D. Nguyen-Manh, and D. Pettifor, Intermetallics **14**, 1472 (2006).
- [172] I. Petrov, R. Imamov, and Z. Pinsker, Sov Phys Crystallogr **13**, 339 (1968).
- [173] J. Evers, G. Oehlinger, and A. Weiss, Zeitschrift für Naturforschung B **34**, 524 (1979).
- [174] M. A. Pell, Y. V. Mironov, and J. A. Ibers, Acta Crystallographica Section C: Crystal Structure Communications **52**, 1331 (1996).
- [175] L. Yan, Z. Jian-Zhou, Y. Li, L. Cheng-Tian, L. Ai-Ji, H. Cheng, D. Ying, X. Yu, H. Shao-Long, Z. Lin, *et al.*, Chinese Physics Letters **32**, 067303 (2015).
- [176] G. Kliche, Journal of Solid State Chemistry **56**, 26 (1985).
- [177] M. Yan, H. Huang, K. Zhang, E. Wang, W. Yao, K. Deng, G. Wan, H. Zhang, M. Arita, H. Yang, *et al.*, Nature communications **8**, 257 (2017).
- [178] M. Stasova, Journal of Structural Chemistry **8**, 584 (1967).
- [179] K. Taketoshi and F. Andoh, Japanese journal of applied physics **34**, 3192 (1995).

- [180] D. J. Hinz, G. Meyer, T. Dedecke, and W. Urland, *Angewandte Chemie* **107**, 97 (1995).
- [181] M. Jehle, H. Scherer, M. Wendorff, and C. Roehr, *Journal of Solid State Chemistry* **182**, 1129 (2009).
- [182] C. Hadenfeldt and H. Herdejürgen, *Zeitschrift für Anorganische und Allgemeine Chemie* **558**, 35C40 (1988).
- [183] H. He, R. Stearrett, E. R. Nowak, and S. Bobev, *European Journal of Inorganic Chemistry* **2011**, 4025 (2011).
- [184] H. W. Shu, S. Jaulmes, and J. Flahaut, *Journal of Solid State Chemistry* **74**, 277 (1988).
- [185] D.-I. M. Asbrand, P. D. D. B. Eisenmann, and J. Klein, *Zeitschrift für Anorganische und Allgemeine Chemie* **621**, 576 (1995).
- [186] Q. Gibson, L. Schoop, L. Muechler, L. Xie, M. Hirschberger, N. Ong, R. Car, and R. Cava, *Physical Review B* **91**, 205128 (2015).
- [187] L. Shelimova, O. Karpinskii, M. Kretova, and G. Lubman, *INORGANIC MATERIALS* **29**, 56 (1993).
- [188] M. Neupane, S.-Y. Xu, L. A. Wray, A. Petersen, R. Shankar, N. Alidoust, C. Liu, A. Fedorov, H. Ji, J. M. Allred, *et al.*, *Physical Review B* **85**, 235406 (2012).
- [189] R. Chami, G. Brun, J. Tedenac, and M. Maurin, *Rev. Chim. Miner* **20**, 305 (1983).
- [190] J. A. Bland and S. J. Basinski, *Canadian Journal of Physics* **39**, 1040 (2011).
- [191] H. Zhang, X. He, W. Lin, R. Wei, F. Zhang, X. Du, G. Dong, and J. Qiu, *Optics Express* **23**, 13376 (2015).
- [192] C. P. Vicente, J. L. Tirado, K. Adouby, J. C. Jumas, A. A. Toure, and G. Kra, *Cheminform* **30**, no (2010).
- [193] H. Zhang, C. X. Liu, X. L. Qi, X. Dai, Z. Fang, and S. C. Zhang, *Nature Physics* **5**, 438 (2009).
- [194] O. G. Karpinskii, L. E. Shelimova, M. A. Kretova, E. S. Avilov, and V. S. Zemskov, *Inorganic Materials* **39**, 240 (2003).
- [195] O. Beckmann, H. Boller, and H. Nowotny, *Monatshefte für Chemie* **101**, 945 (1970).
- [196] J. P. Maehlen, V. A. Yartys, and B. C. Hauback, *Journal of Alloys and Compounds* **s 356C357**, 475 (2003).
- [197] Khaenko B.V. and Kukoli V.V., (1989).
- [198] H. Boudarba, Y. Djaballah, A. Belgacem-Bouzida, and R. Beddiaf, *Intermetallics* **28**, 108 (2012).
- [199] R. Nedumkandathil, D. E. Benson, J. Grins, K. Spektor, and U. Haeussermann, *Cheminform* **46** (2015).
- [200] H. Huang, J. Liu, D. Vanderbilt, and W. Duan, *Physical Review B* **93**, 201114 (2016).
- [201] D. Fenske and H. G. V. Schnering, *Angewandte Chemie* **95**, 420 (1983).
- [202] J. E. Davey and T. Pankey, *Applied Physics Letters* **12**, 38 (1968).
- [203] N. Serebryanaya, *Powder Diffraction* **7**, 99 (1992).
- [204] V. Khitrova, *Kristallografiya* **6**, 549 (1961).
- [205] K. Lejaeghere, V. V. Speybroeck, G. V. Oost, and S. Cottenier, *Critical Reviews in Solid State and Materials Sciences* **39**, 1 (2014).
- [206] R. Mazelsky and M. S. Lubell, *Journal of Physical Chemistry* **66** (2002).
- [207] H. Lin, R. Markiewicz, L. Wray, L. Fu, M. Hasan, and A. Bansil, *Physical review letters* **105**, 036404 (2010).
- [208] T. L. Anderson and H. B. Krause, *Acta Crystallographica* **30**, 1307C1310 (1974).
- [209] T. V. Menshchikova, S. Ereemeev, and E. V. Chulkov, *JETP letters* **94**, 106 (2011).
- [210] G. Concas, T. De Pascale, L. Garbato, F. Ledda, F. Meloni, A. Rucci, and M. Serra, *Journal of Physics and Chemistry of Solids* **53**, 791 (1992).
- [211] D. Niesner, S. Otto, V. Hermann, T. Fauster, T. Menshchikova, S. Ereemeev, Z. Aliev, I. Amiraslanov, M. Babanly, P. Echenique, *et al.*, *Physical Review B* **89**, 081404 (2014).
- [212] T. L. Anderson and H. B. Krause, *Acta Crystallographica* **30**, 1307C1310 (1974).
- [213] K. Kifune, Y. Kubota, T. Matsunaga, and N. Yamada, *Acta Crystallographica* **61**, 492 (2005).
- [214] R. Araujo and J. Corbett, *Inorganic Chemistry* **20**, 3082 (1981).
- [215] P. Ravindran, P. Vajeeston, R. Vidya, A. Kjekshus, and H. Fjellvåg, *Physical Review B* **64**, 224509 (2001).
- [216] E. Gladyshevskii, *Journal of Structural Chemistry* **5**, 523 (1964).
- [217] S. Brutti, D. Nguyen-Manh, and D. Pettifor, *Intermetallics* **14**, 1472 (2006).
- [218] E. Chebotareva and S. Nuzhdina, *Phys. Met. Metallogr.* **36**, 200 (1973).
- [219] Y.-U. Kwon and J. D. Corbett, *Journal of alloys and compounds* **190**, 219 (1993).
- [220] C. Rawn, M. Barsoum, T. El-Raghy, A. Prociopio, C. Hoffmann, and C. Hubbard, *Materials research bulletin* **35**, 1785 (2000).
- [221] A. Dwight, *Trans. ASM* **53**, 479 (1961).
- [222] J. Etzkorn, M. Ade, and H. Hillebrecht, *Inorganic chemistry* **46**, 1410 (2007).
- [223] C. Hadenfeldt and H. Herdejürgen, *Zeitschrift für anorganische und allgemeine Chemie* **558**, 35 (1988).
- [224] W. Witteman, A. Giorgi, and D. Vier, *The Journal of Physical Chemistry* **64**, 434 (1960).
- [225] S. Brutti, D. Nguyen-Manh, and D. Pettifor, *Journal of Alloys and Compounds* **457**, 29 (2008).
- [226] R. Umamaheswari, M. Yogeswari, and G. Kalpana, *Solid State Communications* **155**, 62 (2013).
- [227] T. Schleid, P. Lauxmann, and C. Schneck, *Z Kristallogr* **16**, 95 (1999).
- [228] S. Saib and N. Bouarissa, *Physica B: Condensed Matter* **387**, 377 (2007).
- [229] M. Schowalter, A. Rosenauer, and K. Volz, *Acta Crystallographica Section A: Foundations of Crystallography* **68**, 319 (2012).
- [230] J. Schuster and J. Bauer, *Journal of the Less Common Metals* **109**, 345 (1985).
- [231] R. Wang, S. Wang, X. Wu, and Y. Yao, *Solid State Communications* **151**, 996 (2011).
- [232] C.-H. Chen, T. Aizawa, N. Iyi, A. Sato, and S. Otani, *Journal of Alloys and Compounds* **366**, L6 (2004).
- [233] L. Tanner and R. Ray, *Acta Metallurgica* **27**, 1727 (1979).
- [234] U. Schwarz, H. Hillebrecht, M. Kaupp, K. Syassen, H.-G. von Schnering, and G. Thiele, *Journal of solid state chemistry* **118**, 20 (1995).



- [235] M. Sakata, T. Nishiwaki, and J. Harada, *Journal of the Physical Society of Japan* **47**, 232 (1979).
- [236] K. Yamada, S. Funabiki, H. Horimoto, T. Matsui, T. Okuda, and S. Ichiba, *Chemistry Letters* **20**, 801 (1991).
- [237] T. Chattopadhyay, H. Von Schnering, W. Grosshans, and W. Holzapfel, *Physica B+ C* **139**, 356 (1986).
- [238] D. Killpatrick, *Journal of Physics and Chemistry of Solids* **25**, 1213 (1964).
- [239] Y. F. Lomnytska and V. Berezovets, *Inorganic materials* **41**, 1166 (2005).
- [240] S. Furuseth, K. Selte, A. Kjekshus, S. Gronowitz, R. Hoffman, and A. Westerdahl, *Acta Chem. Scand* **19**, 42 (1965).
- [241] M. Kim, C.-Z. Wang, and K.-M. Ho, arXiv preprint arXiv:1807.03405 (2018).
- [242] K. Yoshihara, J. Taylor, L. Calvert, and J. Despault, *Journal of the Less Common Metals* **41**, 329 (1975).
- [243] Z. Lv, H. Hu, C. Wu, S. Cui, G. Zhang, and W. Feng, *Physica B: Condensed Matter* **406**, 2750 (2011).
- [244] Y. Imai and A. Watanabe, *Journal of Alloys and Compounds* **509**, 7877 (2011).
- [245] M. S. Suleiman and D. P. Joubert, arXiv preprint arXiv:1310.2751 (2013).
- [246] M. Abdusalyamova, O. Rakhmatov, and K. Shokirov, *Russian Metallurgy* **1988**, 183 (1988).
- [247] M. Zeng, C. Fang, C. G., Y.-A. Chen, T. Hsieh, A. Bansil, H. Lin, and L. Fu, arXiv: 1504.03492 (2015).
- [248] A. Iandelli, *Atti della Accademia Nazionale dei Lincei, Classe di Scienze Fisiche, Matematiche e Naturali, Rendiconti, Serie 8 (1, 1946-)* **37**, 160 (1964).
- [249] G. Ugur, S. Ugur, A. Erkisi, and F. Soyalp, *Int. J. Mod. Phys.* **22**, 5027 (2008).
- [250] M. Abdusalyamova, H. Shokirov, and O. Rakhmatov, *Journal of the Less-Common Metals* **166**, 221 (1990).
- [251] H. Goretzki, *physica status solidi (b)* **20**, K141 (1967).
- [252] S. Semiletov, *Kristallografiya* **4**, 629 (1959).
- [253] H. J. Deiseroth, A. Strunck, and W. Bauhofer, *Zeitschrift Fr Anorganische Und Allgemeine Chemie* **575**, 31C38 (1989).
- [254] B. Eisenmann, C. Gieck, and U. Roessler, *Zeitschrift fuer Kristallographie - New Crystal Structures* **216**, 36 (2001).
- [255] B. Brown, *Acta Crystallographica* **20**, 268 (1966).
- [256] K. Deller and B. Eisenmann, *Cheminform* **7**, 1146 (1976).
- [257] S. Kikkawa, N. Ogawa, M. Koizumi, and Y. Onuki, *Journal of Solid State Chemistry* **41**, 315 (1982).
- [258] G. Kumagai, T. Matsuura, K. Ichimura, K. Yamaya, K. Inagaki, and S. Tanda, *Physical Review B* **81**, 184506 (2010).
- [259] J. Kleppinger, J. Wrazel, J. Calabrese, and E. Larsen, *Inorganic Chemistry* **19**, 3172 (1980).
- [260] M. Somer, W. Carrillo Cabrera, K. Peters, and H. von Schnering, *Zeitschrift fuer Kristallographie - New Crystal Structures* **213**, 683 (1998).
- [261] W. Bensch and W. Heid, *Acta Crystallographica, Section C: Crystal Structure Communications* **51**, 2205 (1995).
- [262] Y.-Y. Wang, Q.-H. Yu, P.-J. Guo, K. Liu, and T.-L. Xia, *Physical Review B* **94**, 041103 (2016).
- [263] R. G. Ling and C. Belin, **292**, 891 (1981).
- [264] L. H. Dietrich and W. Jeitschko, *Journal of Solid State Chemistry* **63**, 377 (1986).
- [265] P. Jensen, A. Kjekshus, T. Skansen, J. Brunvoll, and M. Hinton, *Acta Chemica Scandinavica* **19**, 1499 (1965).
- [266] J. Wang, S. Q. Xia, and X. T. Tao, *Cheminform* **44**, 6 (2013).
- [267] B. Saparov, S. Q. Xia, and S. Bobev, *Inorganic Chemistry* **47**, 11237 (2008).
- [268] V. B. Heike, S. Arndt, and B. Wolfgang, *Zeitschrift Fr Anorganische Und Allgemeine Chemie* **438**, 53C67 (1978).
- [269] O. Levy, G. L. W. Hart, and S. Curtarolo, *Acta Materialia* **58**, 2887 (2010).
- [270] S. V. Savilov, V. N. Khrustalev, A. N. Kuznetsov, B. A. Popovkin, and M. Y. Antipin, *Russian Chemical Bulletin* **54**, 87 (2005).
- [271] P. Tang, B. Yan, W. Cao, S.-C. Wu, C. Felser, and W. Duan, *Physical Review B* **89**, 041409 (2014).
- [272] E. Todorov and S. C. Sevov, *Angewandte Chemie International Edition* **38**, 1775 (1999).
- [273] D. G. Adolphson and J. D. Corbett, *Chemischer Informationsdienst* **7**, 1820 (1976).
- [274] S. J. Hwu, D. S. Dudis, and J. D. Corbett, *Inorganic Chemistry* **26**, 469 (1987).
- [275] F. Hulliger, *Nature* **204**, 775 (1964).
- [276] S. Furuseth and A. Kjekshus, *Acta Chemica Scandinavica (1-27,1973-42,1988)* **18**, 1180 (1964).
- [277] F. Hulliger, *Nature* **204**, 775 (1964).
- [278] Y. Li, L. Li, J. Wang, T. Wang, X. Xu, C. Xi, C. Cao, and J. Dai, *Physical Review B* **94**, 121115 (2016).
- [279] A. Hayashi, Y. Ueda, K. Kosuge, H. Murata, H. Asano, N. Watanabe, and F. Izumi, *Journal of Solid State Chemistry* **67**, 346 (1987).
- [280] M. Conrad and B. Harbrecht, *Journal of Alloys and Compounds* **187**, 181 (1992).
- [281] V. Larchev and S. Popova, *Journal of the Less-Common Metals* **87-91**, 50 (1982).
- [282] S. Ibragimova, F. Aliev, O. Aliev, V. Mamedov, and Z. Ibragimov, *Russian Journal of Inorganic Chemistry* **39**, 194 (1994).
- [283] R. Ceolin, N. Rodier, and P. Khodadad, *Journal of the Less-Common Metals* **53**, 137 (1977).
- [284] T. Chattopadhyay, K. Khalaff, and K. Schubert, *Metallofizika* **28**, 1160 (1974).
- [285] G. Cordier, H. Schaefer, and M. Stelter, *Zeitschrift fuer Naturforschung, Teil B. Anorganische Chemie, Organische Chemie (33,1978-41,1986)* **40**, 5 (1985).
- [286] D. Schmitz and W. Bronger, *Zeitschrift für Naturforschung B* **29**, 438 (1974).
- [287] B. Altintas, *Journal of Theoretical and Computational Chemistry* **10**, 65 (2011).
- [288] G. Bruzzone and F. Merlo, *Journal of the Less Common Metals* **35**, 153 (1974).
- [289] E. DiMasi, B. Foran, M. Aronson, and S. Lee, *Physical Review, Serie 3. B - Condensed Matter (18,1978-)* **54**, 13587 (1996).
- [290] W. Rieger and E. Parthé, *Acta Crystallographica* **22**, 919 (1967).

- [291] A. Kitano, K. Moriguchi, M. Yonemura, S. Munetoh, A. Shintani, H. Fukuoka, S. Yamanaka, E. Nishibori, M. Takata, and M. Sakata, *Physical Review B* **64**, 045206 (2001).
- [292] W. Rieger and E. Parthé, *Acta Crystallographica* **22**, 919 (1967).
- [293] G. Bruzzone and E. Franceschi, *Journal of the Less-Common Metals* **52**, 211 (1977).
- [294] M. T. Klem, J. Vaughey, J. G. Harp, and J. D. Corbett, *Inorganic chemistry* **40**, 7020 (2001).
- [295] M. Bailey and F. DiSalvo, *Journal of Alloys and Compounds* **353**, 146 (2003).
- [296] B. Saparov and S. Bobev, *Dalton Transactions* **39**, 11335 (2010).
- [297] F. Merlo and M. Fornasini, *Journal of the Less Common Metals* **119**, 45 (1986).
- [298] E. A. Leon-Escamilla and J. D. Corbett, *Inorganic chemistry* **40**, 1226 (2001).
- [299] B. Saparov and S. Bobev, *Dalton Transactions* **39**, 11335 (2010).
- [300] F. Merlo and M. Fornasini, *Journal of the Less Common Metals* **13**, 603 (1967).
- [301] A. Widera and H. Schäfer, *Journal of the Less Common Metals* **77**, 29 (1981).
- [302] J. Zhao and E. Parthe, *Acta Crystallographica, Section C: Crystal Structure Communications* **46**, 2276 (1990).
- [303] T. Langer, S. Dupke, H. Eckert, S. Matar, M. Winter, and R. Poettgen, *Solid State Sciences* **14**, 367 (2012).
- [304] G. Shengping, Y. Taesoo, and S. Bobev, *Inorganic Chemistry* **51**, 367 (3119).
- [305] G. Cordier, *Zeitschrift für Naturforschung B* **43**, 1253 (1988).
- [306] R. Rousseau, K. Uehara, D. D. Klug, and J. S. Tse, *ChemPhysChem* **6**, 1703 (2005).
- [307] Q. Xie, E. Cuervo Reyes, M. Wörle, and R. Nesper, *Zeitschrift für anorganische und allgemeine Chemie* **637**, 846 (2011).
- [308] M. C. Schäfer, N.-T. Suen, and S. Bobev, *Dalton Transactions* **43**, 16889 (2014).
- [309] P. Pietrokowsky, *Journal of the Institute of Metals* **90**, 434 (1962).
- [310] W. Yi, Y. Matsushita, M. Tanaka, and A. A. Belik, *Inorganic chemistry* **51**, 7650 (2012).
- [311] H. He, C. Tyson, and S. Bobev, *Inorganic chemistry* **50**, 8375 (2011).
- [312] K. Schubert, H. Breimer, W. Burkhardt, E. Günzel, R. Hauffer, H. Lukas, H. Vetter, J. Wegst, and M. Wilkens, *Naturwissenschaften* **44**, 229 (1957).
- [313] V. Johnson and W. Jeitschko, *Journal of Solid State Chemistry* **6**, 306 (1973).
- [314] H. Onken, K. Vierheilg, and H. Hahn, *Zeitschrift für anorganische und allgemeine Chemie* **333**, 267 (1964).
- [315] Q. Xu, Z. Song, S. Nie, H. Weng, Z. Fang, and X. Dai, *Physical Review B* **92**, 205310 (2015).
- [316] V. Johnson and W. Jeitschko, *Journal of Solid State Chemistry* **6**, 306 (1973).
- [317] A. Klein Haneveld and F. Jellinek, *Recueil des Travaux Chimiques des Pays-Bas* **83**, 776 (1964).
- [318] A. Klein Haneveld and F. Jellinek, *Recueil des Travaux Chimiques des Pays-Bas* **83**, 776 (1964).
- [319] V. Smetana, V. Babizhetskyy, G. V. Vajenine, and A. Simon, *Journal of Solid State Chemistry* **180**, 1889 (2007).
- [320] W. Pearson, *Zeitschrift für Kristallographie-Crystalline Materials* **171**, 23 (1985).
- [321] A. Hütz, *Z. Metallkd* **65**, 618 (1974).
- [322] M. Martinez-Ripoll, A. Haase, and G. Brauer, *Acta Crystallographica Section B: Structural Crystallography and Crystal Chemistry* **30**, 2003 (1974).
- [323] B. EISENMANN and K. DELLER, *ZEITSCHRIFT FÜR NATURFORSCHUNG SECTION BA JOURNAL OF CHEMICAL SCIENCES* **30**, 66 (1975).
- [324] T. Yajima, K. Nakano, F. Takeiri, J. Hester, T. Yamamoto, Y. Kobayashi, N. Tsuji, J. Kim, A. Fujiwara, and H. Kageyama, *Journal of the Physical Society of Japan* **82**, 013703 (2012).
- [325] H. Putz, J. Schön, and M. Jansen, *Zeitschrift für anorganische und allgemeine Chemie* **625**, 1624 (1999).
- [326] M. Martinez-Ripoll, A. Haase, and G. Brauer, *Acta Crystallographica Section B* **29**, 1715 (1973).
- [327] O. Degtyareva, M. I. McMahon, and R. J. Nelmes, *High Pressure Research* **15**, 143 (1996).
- [328] M. Ellner and B. Predel, *Zeitschrift fuer Metallkunde* **51**, 327 (1960).
- [329] P. Gougeon, O. Pena, M. Potel, M. Sergent, and R. Brusetti, *Annales de Chimie (Paris) (Vol=Year)* **9**, 1079 (1984).
- [330] J. Evers, G. Oehlinger, and A. Weiss, *Angewandte Chemie* **89**, 673 (1977).
- [331] K. Yamana, K. Kihara, and T. Matsumoto, *Acta Crystallographica* **35**, 147 (2010).
- [332] I. Petrov and R. Imamov, *Kristallografiya* **14**, 699 (1969).
- [333] I. Silkin, Y. M. Koroteev, S. Ereemeev, G. Bihlmayer, and E. V. Chulkov, *JETP letters* **94**, 217 (2011).
- [334] M. M. Stasova, *Journal of Structural Chemistry* **8**, 584 (1967).
- [335] K. Yamana, K. Kihara, and T. Matsumoto, *Acta Crystallographica* **35**, 147 (2010).
- [336] T. Matkovic and P. Matkovic, *Metalurgija, Croatia* **31**, 107 (1992).
- [337] C. Wang, C. Eylem, and T. Hughbanks, *Inorganic Chemistry* **37**, 390 (1998).
- [338] H. He, C. Tyson, and S. Bobev, *Cheminform* **42**, 8375 (2011).
- [339] S. Geller and J. H. Wernick, *Acta Crystallographica* **12**, 46C54 (1959).
- [340] B. Gardes, G. Brun, and J.-C. Tedenac, *European journal of solid state and inorganic chemistry* **26**, 221 (1989).
- [341] Q. Gibson, L. Schoop, A. Weber, H. Ji, S. Nadj-Perge, I. Drozdov, H. Beidenkopf, J. Sadowski, A. Fedorov, A. Yazdani, *et al.*, *Physical Review B* **88**, 081108 (2013).
- [342] R. Imamov and S. Semiletov, *Sov Phys Crystallogr* **15**, 845 (1971).
- [343] R. L. Daake and J. D. Corbett, *Chemischer Informationsdienst* **8**, 2029 (1977).
- [344] K. Sakamaki, H. Wada, H. Nozaki, Y. nuki, and M. Kawai, *Journal of Alloys and Compounds* **339**, 283 (2002).
- [345] B. Eisenmann and M. Somer, *Zeitschrift Fr Naturforschung B* **44**, 1228 (1989).
- [346] Hadenfeldt, *Zeitschrift Fr Anorganische Und Allgemeine Chemie* **436**, 113 (1977).
- [347] H. Mattausch, A. Simon, N. Holzer, and R. Eger, *Zeitschrift fuer Anorganische und Allgemeine Chemie (1950) (DE)* **466**, 7 (1980).

- [348] J. Yang and F. Gao, *physica status solidi (b)* **247**, 2161 (2010).
- [349] C. Sunandana, K. Chandrasekaran, G. Aravamudan, and G. S. Rao, *Journal of the Less Common Metals* **84**, 115 (1982).
- [350] Y. Du, X. Bo, D. Wang, E.-J. Kan, C.-G. Duan, S. Y. Savrasov, and X. Wan, *Physical Review B* **96**, 235152 (2017).
- [351] E. Zhao, J. Wang, J. Meng, and Z. Wu, *Computational Materials Science* **47**, 1064 (2010).
- [352] A. Iandelli, *ChemInform* **18**, 28 (1987).
- [353] A. Mewis, *Zeitschrift für Naturforschung B* **34**, 14 (1979).
- [354] A. Czybulka, G. Steinberg, and H.-U. Schuster, *Zeitschrift für Naturforschung B* **34**, 1057 (1979).
- [355] D. Johrendt and A. Mewis, *Journal of Alloys and Compounds* **183**, 210 (1992).
- [356] J. T. Norton, H. Blumenthal, and S. J. Sindeband, *JOM* **1**, 749 (1949).
- [357] Y.-U. Kwon and J. D. Corbett, *Journal of alloys and compounds* **190**, 219 (1993).
- [358] R. Vogel and H. Schuster, *Zeitschrift fuer Naturforschung, Teil B. Anorganische Chemie, Organische Chemie (33,1978-41,1986)* **35**, 114 (1980).
- [359] H.-J. Zhang, S. Chadov, L. Muehler, B. Yan, X.-L. Qi, J. Kübler, S.-C. Zhang, and C. Felser, *Physical review letters* **106**, 156402 (2011).
- [360] K. G. Strid, N. G. Vannerberg, J. Sletten, E. Kulonen, J. Brunvoll, E. Bunnenberg, C. Djerassi, and R. Records, *Acta Chemica Scandinavica* **20**, 1064 (1966).
- [361] R. Matthes and H. U. Schuster, *Zeitschrift Fr Naturforschung B* **35**, 778 (1980).
- [362] C. Tomuschat and H. U. Schuster, *Zeitschrift Fr Naturforschung B* **36**, 1193 (1981).
- [363] H. Vincent, C. Vincent, B. F. Mentzen, S. Pastor, and J. Bouix, *Materials Science and Engineering A* **256**, 83C91 (1998).
- [364] H. Boudarba, Y. Djaballah, A. Belgacem-Bouzida, and R. Beddiaf, *Physica B Condensed Matter* **406**, 2601 (2011).
- [365] T. H. Hsieh, J. Liu, and L. Fu, *Physical Review B* **90**, 081112 (2014).
- [366] A. Palenzona and P. Manfrinetti, *Journal of the Less Common Metals* **85**, 307 (1982).
- [367] A. Widera and H. Schaefer, *Materials Research Bulletin* **15**, 1805 (1980).
- [368] W. Jeitschko, H. Nowotny, and F. Benesovsky, *Monatshefte fuer Chemie* **95**, 436 (1964).
- [369] Y. Cherchab, B. Amrani, N. Sekkal, M. Ghezali, and K. Talbi, *Physica E, Elsevier B.V.* **40**, 606 (2008).
- [370] H. Nowotny, K. Schubert, and U. Dettinger, **37**, 137 (1946).
- [371] W. Zhou, L. Liu, B. Li, P. Wu, and Q. Song, *Computational Materials Science* **46**, 921 (2009).
- [372] B. Saparov, J. E. Mitchell, and A. S. Sefat, *Superconductor Science and Technology* **25**, 084016 (2012).
- [373] A. Dwight and C. Kimball, *Journal of the Less Common Metals* **127**, 179 (1987).
- [374] M. Besnus, J. Kappler, M. Ravet, A. Meyer, R. Lahiouel, J. Pierre, E. Slaud, G. Nieva, and J. Sereni, *Journal of the Less Common Metals* **120**, 101 (1986).
- [375] C. Batalli-Cosmovici, *Zeitschrift für Naturforschung A* **24**, 677 (1969).
- [376] X.-X. Sun, Z.-R. Ren, and D.-G. Wang, *Modern Physics Letters B* **26**, 1250217 (2012).
- [377] A. Kapustin, *Kristallografiya* **7**, 243 (1962).
- [378] A. Zaoui and M. Ferhat, *Solid State Communications* **151**, 867 (2011).
- [379] A. Mariano and K. Chopra, *Applied Physics Letters* **10**, 282 (1967).
- [380] B. Rakshit, S. P. Sanyal, and M. Celino, *Solid State Communications* **149**, 1326 (2009).
- [381] A. Mariano and K. Chopra, *Applied Physics Letters* **10**, 282 (1967).
- [382] P. Bauer Pereira, I. Sergueev, S. Gorsse, J. Dadda, E. Müller, and R. P. Hermann, *physica status solidi (b)* **250**, 1300 (2013).
- [383] T. H. Hsieh, H. Lin, J. Liu, W. Duan, A. Bansil, and L. Fu, *Nature communications* **3**, 982 (2012).
- [384] M. Abdusalyamova, H. Shokirov, and O. Rakhmatov, *Journal of the Less-Common Metals* **166**, 221 (1990).
- [385] P. Lightfoot, F. Krok, J. L. Nowinski, and P. G. Bruce, *Journal of Materials Chemistry* **2**, 139 (1992).
- [386] H. Zhang, C.-X. Liu, X.-L. Qi, X. Dai, Z. Fang, and S.-C. Zhang, *Nature Physics* **5**, 438 (2009).
- [387] Y. Xia, D. Qian, D. Hsieh, L. Wray, A. Pal, H. Lin, A. Bansil, D. Grauer, Y. S. Hor, R. J. Cava, and M. Z. Hasan, *Nature Physics* **5**, 398 (2009).
- [388] D. O. Scanlon, P. D. C. King, R. P. Singh, A. d. l. Torre, S. M. Walker, G. Balakrishnan, F. Baumberger, and C. R. A. Catlow, *Adv. Mater.* **24**, 2154 (2012).
- [389] T. H. Hsieh, H. Lin, J. Liu, W. Duan, A. Bansil, and L. Fu, *Nat. Commun.* **3**, 982 (2012).
- [390] N. Wang, D. West, J. Liu, J. Li, Q. Yan, B.-L. Gu, S. B. Zhang, and W. Duan, *Phys. Rev. B* **89**, 045142 (2014).
- [391] J. Beck and T. Schlorb, *Z. Kristallogr* **214**, 780 (1999).
- [392] Z. Zvonkova and G. Zhdanov, *Zhurnal Fizicheskoi Khimii* **26**, 586 (1952).
- [393] W. Mueller, *Zeitschrift fuer Naturforschung, Teil B. Anorganische Chemie, Organische Chemie (2,1947-32,1977)* **29**, 304 (1974).
- [394] C.-S. Lee, A. Safa-Sefat, J. Greedan, and H. Kleinke, *Chemistry of materials* **15**, 780 (2003).
- [395] N. Gerlitzki and G. Meyer, *Zeitschrift fuer Anorganische und Allgemeine Chemie (1950) (DE)* **628**, 915 (2002).
- [396] L. Chang and T. Read, *JOM* **3**, 47 (1951).
- [397] H. Doonkersloot and V. Vucht, *Journal of Less-Common Metals* **20**, 83 (1970).
- [398] S. Deibele and M. Jansen, *Journal of Solid State Chemistry* **147**, 117 (1999).
- [399] F. Merlo and M. Fornasini, *Materials research bulletin* **29**, 149 (1994).
- [400] K. Schubert, H. Lukas, H. Meissner, and S. Bhan, *Zeitschrift fur Metallkunde* **50**, 534 (1959).
- [401] M. Sauer, A. Engel, and H. Lueken, *ChemInform* **183**, 281 (1992).
- [402] S.-J. Hwu and J. D. Corbett, *Journal of Solid State Chemistry* **64**, 331 (1986).

- [403] E. Brechtel, G. Cordier, and H. Schäfer, *Zeitschrift für Naturforschung B* **36**, 1099 (1981).
- [404] E. Brechtel, G. Cordier, and H. Schäfer, *Zeitschrift für Naturforschung B* **34**, 1229 (1979).
- [405] O. Aliev, *Inorganic Mater.* **16**, 1027 (1981).
- [406] G. Cordier and T. Friedrich, *Zeitschrift für Kristallographie-Crystalline Materials* **205**, 135 (1993).
- [407] B. Eisenmann and M. Asbrand, *Zeitschrift für Kristallographie-Crystalline Materials* **198**, 283 (1992).
- [408] H. Guerrero, R. Cappelletti, D. Neumann, and T. Yildirim, *Chemical physics letters* **297**, 265 (1998).
- [409] E. Rönnebro, J. Yin, A. Kitano, M. Wada, and T. Sakai, *Solid State Ionics* **176**, 2749 (2005).
- [410] J. Omaly, P. Batail, D. Grandjean, D. Avignant, and J.-C. Cousseins, *Acta Crystallographica Section B* **32**, 2106 (1976).
- [411] D. Colaitis, C. Lecaille, and D. Lebas, *Revue de Chimie Minerale* **9**, 709 (1972).
- [412] P. Fischer, D. Schwarzenbach, and H. Rietveld, *Journal of Physics and Chemistry of Solids* **32**, 543 (1971).
- [413] Z. Mazej, E. Goreshnik, and G. Tavčar, *Journal of Fluorine Chemistry* **132**, 686 (2011).
- [414] D. Kurzydowski, Z. Mazej, Z. Jagličić, Y. Filinchuk, and W. Grochala, *Chemical Communications* **49**, 6262 (2013).
- [415] M. Sauer, A. Engel, and H. Lueken, *Journal of Alloys and Compounds* **183**, 281 (1992).
- [416] W. M. Hurng and J. D. Corbett, *Chemistry of Materials* **1**, 311 (1989).
- [417] G. Bruzzone, E. Franceschi, and F. Merlo, *Journal of the Less-Common Metals* **60**, 59 (1978).
- [418] W. M. Hurng and J. D. Corbett, *Chemistry of Materials* **1**, 311 (1989).
- [419] J. Li and P. J. Carroll, *Materials research bulletin* **27**, 1073 (1992).
- [420] J. Jorda, M. Ishikawa, and E. Hovestreydt, *Journal of the Less Common Metals* **92**, 155 (1983).
- [421] C. Jiang, Z. Lin, and Y. Zhao, *Scripta Materialia* **63**, 532 (2010).
- [422] J. Li, M. E. Badding, and F. DiSalvo, *Journal of alloys and compounds* **184**, 257 (1992).
- [423] A. Heerdmann, D. Johrendt, and A. Mewis, *Zeitschrift für anorganische und allgemeine Chemie* **626**, 1393 (2000).
- [424] O. McMasters, K. Gschneider, G. Bruzzone, and A. Palenzona, *Journal of the Less-Common Metals* **25**, 135 (1971).
- [425] R. Troc, R. Wawryk, and A. Gribanov, *Journal of Alloys and Compounds* **581**, 659 (2013).
- [426] J. Jorda, M. Ishikawa, and E. Hovestreydt, *Journal of the Less-Common Metals* **92**, 155 (1983).
- [427] J. Moreau, J. le Roy, and D. Paccard, *Acta Crystallographica B* (24,1968-38,1982) **38**, 2446 (1982).
- [428] U. Rodewald, B. Heying, R. Hoffmann, D. Niepmann, and R. Poettgen, *Zeitschrift fuer Naturforschung, B: Chemical Sciences* **64**, 383 (2009).
- [429] J. Moreau, J. le Roy, and D. Paccard, *Acta Crystallographica B* (24,1968-38,1982) **38**, 2446 (1982).
- [430] W. Harms, V. Mihajlov, M. Wendorff, and C. Roehr, *ChemInform* **41**, 1127 (2010).
- [431] F. Merlo, *Journal of the Less Common Metals* **86**, 241 (1982).
- [432] M. Bostrom, Y. Prots, and Y. Grin, *Zeitschrift für Kristallographie-New Crystal Structures* **219**, 3 (2004).
- [433] S. Seidel, R.-D. Hoffmann, and R. Poettgen, *Zeitschrift für Kristallographie-Crystalline Materials* **229**, 421 (2014).
- [434] M. Poetzschke and K. Schubert, *Zeitschrift fuer Metallkunde* **53**, 474 (1962).
- [435] R. Andrusyak and B. Kotur, *Russian Metallurgy(USA)* **1991**, 204 (1991).
- [436] F. Schmidt, O. McMasters, and O. Carlson, *Journal of the Less Common Metals* **26**, 53 (1972).
- [437] M. G. Haase, H. Block, and W. Jeitschko, *Zeitschrift für anorganische und allgemeine Chemie* **627**, 1941 (2001).
- [438] R. V. Panin, N. R. Khasanova, A. M. Abakumov, E. V. Antipov, G. Van Tendeloo, and W. Schnelle, *Journal of Solid State Chemistry* **180**, 1566 (2007).
- [439] H. Zentgraf, K. Claes, and R. Hoppe, *Zeitschrift fuer Anorganische und Allgemeine Chemie (1950) (DE)* **462**, 92 (1980).
- [440] H. G. von Schnering, M. Hartweg, U. Hartweg, and W. Hönle, *Angewandte Chemie* **101**, 98 (1989).
- [441] S. Li, Z.-M. Yu, Y. Liu, S. Guan, S.-S. Wang, X. Zhang, Y. Yao, and S. A. Yang, *Physical Review B* **96**, 081106 (2017).
- [442] S. Clarke and F. DiSalvo, *Journal of Solid State Chemistry* **132**, 394 (1997).
- [443] K. Gschneidner Jr, Y. Mudryk, A. Becker, and J. Larson, *Calphad* **33**, 8 (2009).
- [444] T. Button, I. McColm, and J. Ward, *Journal of the Less Common Metals* **159**, 205 (1990).
- [445] D. Li, G. Luo, Z. Xiao, and J. Dai, *Science China Chemistry* **55**, 131 (2012).
- [446] P. Tobash and S. Bobev, *Journal of Alloys and Compounds* **418**, 58 (2006).
- [447] C. Wilkinson, *Acta Crystallographica (1,1948-23,1967)* **22**, 924 (1967).
- [448] S. E. McLain, M. R. Dolgos, D. A. Tennant, J. F. Turner, T. Barnes, T. Proffen, B. C. Sales, and R. I. Bewley, *Nature materials* **5**, 561 (2006).
- [449] Q. Lin and J. D. Corbett, *Inorganic chemistry* **46**, 8722 (2007).
- [450] W. Chaimayo, L. F. Lundegaard, I. Loa, G. W. Stinton, A. R. Lennie, and M. I. McMahon, *High Pressure Research* **32**, 442 (2012).
- [451] Z. Liu, C.-X. Liu, Y.-S. Wu, W.-H. Duan, F. Liu, and J. Wu, *Physical Review Letters* **107**, 136805 (2011).
- [452] R. Wang and H. Steinfink, *Inorganic Chemistry* **6**, 1685 (1967).
- [453] R. Poettgen and W. Jeitschko, *Zeitschrift fuer Naturforschung, B: Chemical Sciences* **47**, 358 (1992).
- [454] S. Guo, T.-S. You, Y.-H. Jung, and S. Bobev, *Inorganic Chemistry* **51**, 6821 (2012).
- [455] T. Siegrist, F. Hulliger, and G. Travaglini, *Journal of the Less-Common Metals* **92**, 119 (1983).
- [456] A. Iandelli and A. Palenzona, *Journal of the Less-Common Metals* **15**, 273 (1968).
- [457] O. McMasters and K. Gschneidner, *Journal of the Less-Common Metals* **38**, 137 (1974).
- [458] V. Smetana and A. Simon, *Zeitschrift für Naturforschung B* **65**, 643 (2010).
- [459] E. Y. Zakharova, A. V. Churakov, T. Doert, and A. N. Kuznetsov, *European Journal of Inorganic Chemistry* **2013**, 6164 (2013).
- [460] S. Panda and S. Bhan, *Zeitschrift fuer Metallkunde* **64**, 793 (1973).
- [461] R. Phal Ram and S. Bhan, *Zeitschrift fuer Metallkunde* **69**, 524 (1978).

- [462] K.-J. Range and E. G. Christl, *Journal of the Less Common Metals* **136**, 277 (1988).
- [463] H. Seifert, *Zeitschrift für Kristallographie-Crystalline Materials* **104**, 385 (1942).
- [464] P. Matković, W. Wopersnow, and K. Schubert, *Journal of the Less Common Metals* **56**, 69 (1977).
- [465] G. Kraemer and M. Jansen, *Journal of Solid State Chemistry* **114**, 206 (1995).
- [466] M. El-Boragy and K. Schubert, *Z. Metallkd* **61**, 579 (1970).
- [467] E. Y. Zakharova, N. A. Andreeva, S. M. Kazakov, and A. N. Kuznetsov, *Journal of Alloys and Compounds* **621**, 307 (2015).
- [468] M. El-Boragy and K. Schubert, *Z. Metallkd* **61**, 579 (1970).
- [469] V. Anand, H. Kim, M. Tanatar, R. Prozorov, and D. Johnston, *Physical Review B* **87**, 224510 (2013).
- [470] A. Mewis, *Zeitschrift für Naturforschung B* **39**, 713 (1984).
- [471] G. Bruzzone and F. Merlo, *Journal of the Less Common Metals* **48**, 103 (1976).
- [472] J. Neumann, A. Mikula, and Y. Chang, *Metallurgical Transactions A* **13**, 1123 (1982).
- [473] M. El-Boragy and K. Schubert, *Z. Metallkd* **61**, 579 (1970).
- [474] H. Nowotny, E. Bauer, A. Stempfl, and H. Bittner, *Monatshefte für Chemie und verwandte Teile anderer Wissenschaften* **83**, 221 (1952).
- [475] B. Dayal *et al.*, *Acta Crystallographica Section B: Structural Crystallography and Crystal Chemistry* **25**, 1010 (1969).
- [476] A. Arakcheeva, V. Grinevich, V. Shamrai, M. Meyer, and G. Chapuis, *Crystallography Reports* **44**, 2 (1999).
- [477] H. Bittner and H. Nowotny, *Monatshefte für Chemie und verwandte Teile anderer Wissenschaften* **83**, 287 (1952).
- [478] F. Laufek, A. Vymazalová, M. Drábek, J. Navrátil, T. Plecháček, and J. Drahokoupil, *Solid State Sciences* **14**, 1476 (2012).
- [479] E. Bauer, H. Nowotny, and A. Stempfl, *Monatshefte für Chemie und verwandte Teile anderer Wissenschaften* **84**, 692 (1953).
- [480] M. El-Boragy and K. Schubert, *Z. Metallkd* **61**, 579 (1970).
- [481] X.-Q. Chen, C. L. Fu, and J. R. Morris, *Intermetallics* **18**, 998 (2010).
- [482] M. El-Boragy and K. Schubert, *Z. Metallkd* **61**, 579 (1970).
- [483] S. Brutti, D. Nguyen-Manh, and D. Pettifor, *Journal of Alloys and Compounds* **457**, 29 (2008).
- [484] M. McMahon, T. Bovornratanaraks, D. Allan, S. Belmonte, and R. Nelmes, *Physical Review B* **61**, 3135 (2000).
- [485] Z. Meiguang, Y. Haiyan, Z. Gangtai, W. Qun, and W. Hui, *Solid State Communications* **152**, 1030 (2012).
- [486] I. Shirovani, K. Yamanashi, J. Hayashi, N. Ishimatsu, O. Shimomura, and T. Kikegawa, *Solid State Communications* **127**, 573 (2003).
- [487] J. Leger, D. Ravot, and J. Rossat Mignod, *Journal of Physics C* **17**, 4935 (1984).
- [488] A. Tyvanchuk, T. Yanson, B. Y. Kotur, O. Zarechnyuk, and M. Kharakterova, *Izvestiya Akademii Nauk SSSR, Metally* **1988**, 187 (1988).
- [489] M. Fornasini, F. Merlo, and M. Pani, *Zeitschrift für Kristallographie-New Crystal Structures* **216**, 23 (2001).
- [490] R. Pöttgen, *Zeitschrift für Naturforschung B* **49**, 1525 (1994).
- [491] K. Portnoi, V. Romashov, and S. Salibekov, *Soviet Powder Metallurgy and Metal Ceramics* **10**, 925 (1971).
- [492] J. Helgorsky, *Ann Chim* **6**, 1339 (1961).
- [493] O. Reckeweg and F. J. DiSalvo, *Zeitschrift für Naturforschung B* **69**, 289 (2014).
- [494] M. Sahlberg and Y. Andersson, *Acta Crystallographica Section C: Crystal Structure Communications* **65**, i7 (2009).
- [495] G. Bruzzone and F. Merlo, *Journal of the Less Common Metals* **32**, 237 (1973).
- [496] H. Holleck, W. Rieger, H. Nowotny, and F. Benesovsky, *Monatshefte für Chemie und verwandte Teile anderer Wissenschaften* **95**, 552 (1964).
- [497] S. Popova and V. Putro, *Inorganic materials* **15**, 947 (1979).
- [498] K. Schubert, A. Raman, and W. Rossteutscher, *Naturwissenschaften* **51**, 506 (1964).
- [499] G. Bruzzone and F. Merlo, *Journal of the Less Common Metals* **35**, 153 (1974).
- [500] B. J. Wieder, B. Bradlyn, Z. Wang, J. Cano, Y. Kim, H.-S. D. Kim, A. Rappe, C. Kane, and B. A. Bernevig, *arXiv preprint arXiv:1705.01617* (2017).
- [501] F. Hulliger and B. Xue, *Journal of alloys and compounds* **215**, 267 (1994).
- [502] R. Pöttgen, *Zeitschrift für Naturforschung B* **50**, 1505 (1995).
- [503] G. Steinberg and H.-U. Schuster, *Zeitschrift für Naturforschung B* **34**, 1237 (1979).
- [504] G. Melnyk, H. Kandpal, L. Gulay, and W. Tremel, *Journal of alloys and compounds* **370**, 217 (2004).
- [505] Y. Wang, T. Yao, J.-L. Yao, J. Zhang, and H. Gou, *Physical Chemistry Chemical Physics* **15**, 183 (2013).
- [506] M. J. Kirkham, A. M. dos Santos, C. J. Rawn, E. Lara-Curzio, J. W. Sharp, and A. J. Thompson, *Physical Review B* **85**, 144120 (2012).
- [507] G. Ryu, S. W. Kim, H. Mizoguchi, S. Matsuishi, and H. Hosono, *EPL (Europhysics Letters)* **99**, 27002 (2012).
- [508] W. Pearson, *Zeitschrift für Kristallographie-Crystalline Materials* **171**, 23 (1985).
- [509] B. Eisenmann, H. Schäfer, and A. Weiss, *Zeitschrift für anorganische und allgemeine Chemie* **391**, 241 (1972).
- [510] R. Vogel and H.-U. Schuster, *Zeitschrift für Naturforschung B* **34**, 1719 (1979).
- [511] A. Klein Haneveld and F. Jellinek, *Recueil des Travaux Chimiques des Pays-Bas* **83**, 776 (1964).
- [512] A. Vendl, *Monatshefte für Chemie-Chemical Monthly* **109**, 1001 (1978).
- [513] S. Ji, M. Imai, H. Zhu, and S. Yamanaka, *Inorganic chemistry* **52**, 3953 (2013).
- [514] L. Man, V. Parmon, R. Imamov, and A. Avilov, *Kristallografiya* **25**, 1070 (1980).
- [515] J. A. Kurzman, M.-S. Miao, and R. Seshadri, *Journal of Physics: Condensed Matter* **23**, 465501 (2011).
- [516] P. W. Brown and F. Worzala, *Journal of Materials Science* **11**, 760 (1976).

- [517] A. Raman, *Aluminium* **41**, 318 (1965).
- [518] N. Kumada, N. Takahashi, N. Kinomura, and A. Sleight, *Materials research bulletin* **32**, 1003 (1997).
- [519] D. Taylor, *Transactions and journal of the British Ceramic Society* **83**, 32 (1984).
- [520] Z. Wang and G. Wang, *Physics Letters A* **381**, 2856 (2017).
- [521] I. Shaplygin, G. Aparnikov, and V. Lazarev, *Russian Journal of Inorganic Chemistry* **23**, 488 (1978).
- [522] M. H. Fernandez and B. Chamberland, *Journal of the Less Common Metals* **99**, 99 (1984).
- [523] A. Ivanovskii, T. Chupakhina, V. Zubkov, A. Tyutyunnik, V. Krasilnikov, G. Bazuev, S. Okatov, and A. Lichtenstein, *Physics Letters A* **348**, 66 (2005).
- [524] M. Golovei, M. Rigan, I. Olekseyuk, and Y. Voroshilov, *Inorganic Materials* **9**, 1354 (1973).
- [525] Z. Wang, H. Weng, Q. Wu, X. Dai, and Z. Fang, *Physical Review B* **88**, 125427 (2013).
- [526] E. Atabaeva, *Soviet Physics-Solid State* **15**, 2346 (1974).
- [527] B. Eisenmann, N. May, W. Müller, H. Schäfer, A. Weiss, J. Winter, and G. Ziegler, *Zeitschrift für Naturforschung B* **25**, 1350 (1970).
- [528] N. May and H. Schäfer, *Zeitschrift für Naturforschung B* **27**, 864 (1972).
- [529] W. Dörrscheidt, N. Niess, and H. Schäfer, *Zeitschrift für Naturforschung B* **31**, 890 (1976).
- [530] S. Yamanaka, M. Kajiyama, S. N. Sivakumar, and H. Fukuoka, *High Pressure Research* **24**, 481 (2004).
- [531] N. May and H. Schäfer, *Zeitschrift für Naturforschung B* **27**, 864 (1972).
- [532] Z. Nong, J. Zhu, X. Yang, Y. Cao, Z. Lai, and Y. Liu, *Physica B: Condensed Matter* **407**, 3555 (2012).
- [533] S. Sridharan and H. Nowotny, *Chemischer Informationsdienst* **74**, 468 (1983).
- [534] Y. Duan, B. Huang, Y. Sun, M. Peng, and S. Zhou, *Journal of Alloys and Compounds* **590**, 50 (2014).
- [535] D. K. Das and D. T. Pitman, *Journal of Metals* **209**, 1175 (1957).
- [536] F. Tappe, S. F. Matar, C. Schwickert, F. Winter, B. Gerke, and R. Pöttgen, *Monatshefte für Chemie-Chemical Monthly* **144**, 751 (2013).
- [537] B. Aurivillius, *Chemica Scripta* **27**, 397 (1987).
- [538] A. Eichhöfer, D. Fenske, and O. Fuhr, *Zeitschrift für anorganische und allgemeine Chemie* **623**, 762 (1997).
- [539] F. Von Batchelder and R. Ræuchle, *Acta Crystallographica* **11**, 122 (1958).
- [540] G. Bruzzone, *Boll. Sci. Fac. Chim. Ind. Bologn* **24**, 113 (1966).
- [541] K. Deller and B. Eisenmann, *Zeitschrift für Naturforschung B* **31**, 29 (1976).
- [542] A. Belgacem-Bouzida, M. Notin, and J. Hertz, *Scripta metallurgica et materialia* **25**, 431 (1991).
- [543] Y. Ge, W. Wan, Y. Liu, and Y. Zhang, *Journal of Physics: Condensed Matter* **29**, 415701 (2017).
- [544] S. Popova and V. Putro, *Inorganic materials* **15**, 947 (1979).
- [545] S. Amerioun and U. Häussermann, *Inorganic chemistry* **42**, 7782 (2003).
- [546] K. Schubert, S. Bhan, T. Biswas, K. Frank, and P. Panday, *Naturwissenschaften* **55**, 542 (1968).
- [547] G. Y. Yonggang and N. L. Ross, *Journal of Physics: Condensed Matter* **23**, 055401 (2011).
- [548] F. Merlo and M. Fornasini, *Materials research bulletin* **29**, 149 (1994).
- [549] A. N. Christensen, *Journal of crystal growth* **129**, 266 (1993).
- [550] K. Schubert, H. Meissner, A. Raman, and W. Rossteutscher, *Naturwissenschaften* **51**, 287 (1964).
- [551] A. Dwight, J. Downey, and R. Conner, *Acta Crystallographica (1,1948-23,1967)* **22**, 745 (1967).
- [552] O. McMasters, K. Gschneidner, G. Bruzzone, and A. Palenzona, *Journal of the Less-Common Metals* **25**, 135 (1971).
- [553] R.-H. Odenthal and R. Hoppe, *Monatshefte für Chemie/Chemical Monthly* **102**, 1340 (1971).
- [554] E. Hellner and F. Laves, *Zeitschrift für Naturforschung A* **2**, 177 (1947).
- [555] H. Nowotny, O. Schob, and F. Benesovsky, *Monatshefte fuer Chemie* **92**, 1300 (1961).
- [556] T. Doert, S. Hoffkes, C. Klein, and P. Boettcher, *Zeitschrift fuer Kristallographie, Supplement Issue* **3**, 52 (1991).
- [557] E. Havinga, H. Damsma, and P. Hokkeling, *Journal of the Less Common Metals* **27**, 169 (1972).
- [558] K. Alasafi and K. Schubert, *Journal of the Less-Common Metals* **65**, P23 (1979).
- [559] B. Li and J. D. Corbett, *Cheminform* **128**, 12392 (2006).
- [560] M. Marko, Y. Kuz'ma, and E. Gladyshevskii, *Dopovidi Akademii Nauk Ukrains'koi RSR, Seriya A: Fiziko-Matematichni Ta Tekhnichni Nauki* **38**, 555 (1976).
- [561] G. S. Pisarenko and N. S. Mozharovskii, *Soviet Powder Metallurgy Metal Ceramics* **5**, 133 (1966).
- [562] E. Havinga, H. Damsma, and P. Hokkeling, *Journal of the Less Common Metals* **27**, 169 (1972).
- [563] H. Y. Yan, Q. Wei, S. M. Chang, and P. Guo, *Trans. Nonferrous Met. Soc. China* **21**, 1627 (2011).
- [564] E. Havinga, H. Damsma, and P. Hokkeling, *Journal of the Less Common Metals* **27**, 169 (1972).
- [565] R. J. Nelmes, D. R. Allan, M. I. McMahon, and S. A. Belmonte, *Phys. Rev. Lett* **83**, 4081 (1999).
- [566] E. Havinga, H. Damsma, and P. Hokkeling, *Journal of the Less Common Metals* **27**, 169 (1972).
- [567] T. Doert, S. Hoffkes, C. Klein, and P. Boettcher, *Zeitschrift fuer Kristallographie, Supplement Issue* **3**, 52 (1991).
- [568] A. Palenzona, *Journal of The Less-Common Metals* **78**, 49 (1981).
- [569] B. Eisenmann and H. Schaefer, *Zeitschrift fuer Naturforschung, Teil B. Anorganische Chemie, Organische Chemie* **29**, 460 (1974).
- [570] C. Hoch, J. Bender, and A. Simon, *Angewandte Chemie* **48**, 2415 (2009).
- [571] K. Schubert, H. G. Meissner, A. Raman, and W. Rossteutscher, *Naturwissenschaften* **51**, 287 (1964).
- [572] Y. Oya, Y. Mishima, and T. Suzuki, *Z. Metallkd.* **78**, 485 (1987).
- [573] K. Schubert and M. Poetzschke, *Naturwissenschaften* **53**, 474 (1962).
- [574] K. Schubert, H. Lukas, H. Meissner, and S. Bhan, *Zeitschrift fuer Metallkunde* **50**, 534 (1959).
- [575] B. Y. Kotur, *Izvestiya Akademii Nauk SSSR, Metally* **1991**, 213 (1991).

- [576] P. Stecher, F. Benesovsky, and H. Nowotny, *Monatshefte für Chemie und verwandte Teile anderer Wissenschaften* **94**, 1154 (1963).
- [577] Y. D. Seropegin and M. V. Rudometkina, *Journal of The Less-Common Metals* **135**, 127 (1987).
- [578] S. Popova, *Fizika Tehnika Vysokikh Davlenij* **11**, 3 (1983).
- [579] R. Horyn and K. Lukaszewicz, *Bulletin de l'Academie Polonaise des Sciences, Serie des Sciences Chimiques* **18**, 59 (1970).
- [580] M. Tillard, *Journal of Alloys Compounds* **584**, 385 (2014).
- [581] G. Bruzzone, E. Franceschi, and F. Merlo, *Journal of the Less-Common Metals* **60**, 59 (1978).
- [582] K. Schubert, S. Bhan, T. Biswas, K. Frank, and P. Panday, *Naturwissenschaften* **55**, 542 (1968).
- [583] H. Schachner, H. Nowotny, and R. Machenschalk, *Monatshefte für Chemie und verwandte Teile anderer Wissenschaften* **84**, 677 (1953).
- [584] C. H. Dauben, D. H. Templeton, and C. Myers, **60**, 111 (1956).
- [585] M. McMahon, T. Bovornratanaraks, D. Allan, S. Belmonte, and R. Nelmes, *Physical Review B* **61**, 3135 (2000).
- [586] A. Gotuk, M. Babanly, and A. Kuliev, *Inorganic materials* **15**, 1062 (1979).
- [587] B. Bachmann and B. Müller, *Zeitschrift für anorganische und allgemeine Chemie* **619**, 189 (1993).
- [588] M. Müller and B. G. Müller, *Zeitschrift für anorganische und allgemeine Chemie* **621**, 1385 (1995).
- [589] S. Bhan, T. Gödecke, P. Panday, and K. Schubert, *Journal of the Less Common Metals* **16**, 415 (1968).
- [590] W. Laschkarew, *Zeitschrift für anorganische und allgemeine Chemie* **193**, 270 (1930).
- [591] M. Onoda, Y. Shi, A. Leithe-Jasper, and T. Tanaka, *Acta Crystallographica Section B: Structural Science* **57**, 449 (2001).
- [592] G. Bruzzone and F. Merlo, *Journal of the Less Common Metals* **32**, 237 (1973).
- [593] A. Mewis, *Zeitschrift fuer Naturforschung, Teil B. Anorganische Chemie, Organische Chemie* **33**, 382 (1978).
- [594] E. Gal'perin and R. Sandler, *Zeitschrift fuer Naturforschung, Teil B. Anorganische Chemie, Organische Chemie* **7**, 217 (1962).
- [595] P. Klipstein, D. Guy, E. Marseglia, J. Meakin, R. Friend, and A. Yoffe, *Journal of Physics C* **19**, 4953 (1986).
- [596] S. Aminalragia-Giamini, J. Marquez-Velasco, P. Tsipas, D. Tsoutsou, G. Renaud, and A. Dimoulas, *2D Materials* **4**, 015001 (2016).
- [597] E. Biehl and H. Deiseroth, *Zeitschrift für anorganische und allgemeine Chemie* **625**, 1337 (1999).
- [598] T. Novoselova, S. Malinov, W. Sha, and A. Zhecheva, *Materials Science and Engineering: A* **371**, 103 (2004).
- [599] A. Mewis, *Zeitschrift fuer Naturforschung, Teil B. Anorganische Chemie, Organische Chemie* **33**, 382 (1978).
- [600] A. Borghesi, C. Chen-Jia, G. Guizzetti, L. Nosenzo, E. Reguzzoni, A. Stella, and F. Lévy, *Physical Review B* **33**, 2422 (1986).
- [601] M. Wendorff and C. Roehr, *Zeitschrift fuer Naturforschung, B: Chemical Sciences* **63**, 1383 (2008).
- [602] A. Zalkin, D. Sands, R. Bedford, and O. Krikorian, *Acta Crystallographica* **14**, 63 (1961).
- [603] A. Zalkin, D. Sands, and O. Krikorian, *Acta Crystallographica* **12**, 713 (1959).
- [604] H. Wiedemeier and P. A. Siemers, *Modern High Temperature Science*, **17**, 395 (1984).
- [605] B. Sa, J. Zhou, Z. Sun, J. Tominaga, and R. Ahuja, *Physical review letters* **109**, 096802 (2012).
- [606] R. Wehrich, S. F. Matar, V. Eyert, F. Rau, M. Zabel, M. Andratschke, I. Anusca, and T. Bernert, *Progress in solid state chemistry* **35**, 309 (2007).
- [607] S. Seidlmayer, F. Bachhuber, I. Anusca, J. Rothballer, M. Bräu, P. Peter, and R. Wehrich, *Zeitschrift für Kristallographie International journal for structural, physical, and chemical aspects of crystalline materials* **225**, 371 (2010).
- [608] R. DeSando and R. Lange, *Journal of Inorganic and Nuclear Chemistry* **28**, 1837 (1966).
- [609] G. Hägg and A. Hybinette, *The London, Edinburgh, and Dublin Philosophical Magazine and Journal of Science* **20**, 913 (1935).
- [610] W. Schanow and K.-J. Range, *Materials Research Bulletin* **18**, 39 (1983).
- [611] H. He, C. Tyson, and S. Bobev, *Inorganic chemistry* **50**, 8375 (2011).
- [612] K. Yamana, K. Kihara, and T. Matsumoto, *Acta Crystallographica B* **35**, 147 (1979).
- [613] J. Daams and P. Villars, *Journal of alloys and compounds* **197**, 243 (1993).
- [614] H. He, C. Tyson, and S. Bobev, *Inorganic chemistry* **50**, 8375 (2011).
- [615] J. Gullman and O. Olofsson, *Journal of Solid State Chemistry* **5**, 441 (1972).
- [616] B. Gržeta, S. Popović, N. Cowlam, and B. Čelustka, *Journal of applied crystallography* **23**, 340 (1990).
- [617] M. Zabel, S. Wandinger, and K.-J. Range, *Z. Naturforsch. 34b* **238**, 241 (1979).
- [618] S. S. Stoyko, M. Khatun, C. S. Mullen, and A. Mar, *Journal of Solid State Chemistry* **192**, 325 (2012).
- [619] J. Schuster and H. Ipser, *Metallurgical Transactions A: Physical Metallurgy and Materials Science* **22**, 1729 (1991).
- [620] R. W. Henning and J. D. Corbett, *Inorganic chemistry* **36**, 6045 (1997).
- [621] F. Averdunk and R. Hoppe, *Journal of the Less Common Metals* **161**, 135 (1990).
- [622] M. Hepworth, K. Jack, R. Peacock, and G. Westland, *Acta Crystallographica* **10**, 63 (1957).
- [623] H. Sowa and H. Ahsbahs, *Acta Crystallographica Section B* **54**, 578 (1998).
- [624] W. Blase and G. Cordier, *Zeitschrift für Kristallographie-Crystalline Materials* **194**, 150 (1991).
- [625] G. Cordier and V. Müller, *Zeitschrift für Kristallographie-Crystalline Materials* **198**, 281 (1992).
- [626] R. Chevrel, M. Potel, M. Sergent, M. Decroux, and O. Fischer, *Journal of Solid State Chemistry* **34**, 247 (1980).
- [627] M. S. Suleiman and D. P. Joubert, *arXiv preprint arXiv:1310.2751* (2013).
- [628] O. Graudejus and B. Müller, *Zeitschrift für anorganische und allgemeine Chemie* **622**, 1549 (1996).
- [629] R. Chevrel, P. Gougeon, M. Potel, and M. Sergent, *Journal of Solid State Chemistry* **57**, 25 (1985).
- [630] W. Bensch and W. Heid, *Journal of alloys and compounds* **224**, 220 (1995).

- [631] J. Huster, G. Schippers, and W. Bronger, *Journal of the Less Common Metals* **91**, 333 (1983).
- [632] M. Bencharif and K. K. Rao, *Journal of materials science* **21**, 3425 (1986).
- [633] J.-M. Tarascon, G. Hull, and F. DiSalvo, *Materials research bulletin* **19**, 915 (1984).
- [634] M. Potel, R. Chevrel, M. Sergent, J. Armici, M. Decroux, and O. Fischer, *Journal of Solid State Chemistry* **35**, 286 (1980).
- [635] J.-M. Tarascon, G. Hull, and F. DiSalvo, *Materials research bulletin* **19**, 915 (1984).
- [636] W. Wu, Y. Liu, S. Li, C. Zhong, Z.-M. Yu, X.-L. Sheng, Y. Zhao, and S. A. Yang, *Physical Review B* **97**, 115125 (2018).
- [637] J.-M. Tarascon, G. Hull, and F. DiSalvo, *Materials research bulletin* **19**, 915 (1984).
- [638] M. Potel, R. Chevrel, and M. Sergent, *Acta Crystallographica Section B* **36**, 1545 (1980).
- [639] C. D. Malliakas and M. G. Kanatzidis, *Journal of the American Chemical Society* **135**, 1719 (2013).
- [640] F. Merlo, M. Pani, and M. Fornasini, *Journal of Alloys and Compounds* **196**, 145 (1993).
- [641] E. Zhao, J. Wang, J. Meng, and Z. Wu, *Computational Materials Science* **47**, 1064 (2010).
- [642] W. Eitel and W. Skalik, *Zeitschrift für anorganische und allgemeine Chemie* **183**, 263 (1929).
- [643] J. Schuster, E. Rudy, and H. Nowotny, *Monatshefte für Chemie/Chemical Monthly* **107**, 1167 (1976).
- [644] J. Yang and F. Gao, *physica status solidi (b)* **247**, 2161 (2010).
- [645] D. V. Suetin, I. R. Shein, and A. L. Ivanovskii, *Journal of Physics and Chemistry of Solids* **70**, 64 (2009).
- [646] R. Eppinga and G. Wiegiers, *Physica B+ C* **99**, 121 (1980).
- [647] C. Sunandana, K. Chandrasekaran, G. Aravamudan, and G. S. Rao, *Journal of the Less Common Metals* **84**, 115 (1982).
- [648] P. Pandit and S. P. Sanyal, in *AIP Conference Proceedings*, Vol. 1349 (AIP, 2011) pp. 855–856.
- [649] R. R. Palanichamy and M. Santhosh, in *AIP Conference Proceedings*, Vol. 1536 (AIP, 2013) pp. 295–296.
- [650] M. S. Suleiman and D. P. Joubert, arXiv preprint arXiv:1310.2751 (2013).
- [651] S. Wang, X. Yu, Z. Lin, R. Zhang, D. He, J. Qin, J. Zhu, J. Han, L. Wang, H.-k. Mao, *et al.*, *Chemistry of Materials* **24**, 3023 (2012).
- [652] E. Zhao, J. Wang, J. Meng, and Z. Wu, *Computational Materials Science* **47**, 1064 (2010).
- [653] G. Soto, *Computational Materials Science* **61**, 1 (2012).
- [654] V. Slovyanskikh, N. Kuznetsov, and N. Gracheva, *Zhurnal Neorganicheskoi Khimii* **29**, 1898 (1984).
- [655] V. Slovyanskikh, N. Kuznetsov, and N. Gracheva, *Zhurnal Neorganicheskoi Khimii* **29**, 1898 (1984).
- [656] S. F. Bartram, *The Crystallography of Some Titanium Sulfides*, Ph.D. thesis, Rutgers University (1958).
- [657] G. Örylgsson and B. Harbrecht, *Zeitschrift für Naturforschung B* **54**, 1125 (1999).
- [658] A. Lachgar, D. S. Dudis, P. K. Dorhout, and J. D. Corbett, *Inorganic Chemistry* **30**, 3321 (1991).
- [659] A. Dwight, M. Mueller, R. CONNER, J. Downey, and H. Knott, *Trans Met Soc AIME* **242**, 2075 (1968).
- [660] J. Prchal, H. Kitazawa, and O. Suzuki, *Journal of alloys and compounds* **437**, 117 (2007).
- [661] Y. Verbovytsky and K. Latka, *Chemistry of metals and alloys* **1**, 261 (2008).
- [662] R. Ferro, R. Marazza, and G. Rambaldi, *Zeitschrift fuer Metallkunde* **65**, 40 (1974).
- [663] E. Hovestreydt, N. Engel, K. Klepp, B. Chabot, and E. Parthé, *Journal of the Less Common Metals* **85**, 247 (1982).
- [664] W. Wopersnow and K. Schubert, *Journal of the Less Common Metals* **52**, 1 (1977).
- [665] K. Anderko and K. Schubert, *ZEITSCHRIFT FÜR METALLKUNDE* **44**, 307 (1953).
- [666] R. Ferro, R. Marazza, and G. Rambaldi, *Zeitschrift für Metallkunde* **65**, 37 (1974).
- [667] Y. V. Galadzhun, Z. Vasyli, H. Piotrowski, P. Mayer, R.-D. Hoffmann, and R. Poettgen, *Zeitschrift für Naturforschung B* **55**, 1025 (2000).
- [668] V. I. Zaremba, U. C. Rodewald, V. P. Dubenskiy, B. Heying, K. Katoh, Y. Niide, A. Ochiai, R. Pöttgen, *et al.*, *Monatshefte für Chemie/Chemical Monthly* **137**, 249 (2006).
- [669] A. Iandelli, *Journal of alloys and compounds* **203**, 137 (1994).
- [670] V. Petrunin and N. Sorokin, *INORG. MATER. Inorg. Mater.* **18**, 1733 (1982).
- [671] R. Ferro, R. Marazza, and G. Rambaldi, *Zeitschrift fuer Metallkunde* **65**, 40 (1974).
- [672] T. Mishra, G. Heymann, H. Huppertz, and R. Pöttgen, *Intermetallics* **20**, 110 (2012).
- [673] O. Laborde, U. Gottlieb, and R. Madar, *Journal of low temperature physics* **95**, 835 (1994).
- [674] A. Tkachuk and A. Mar, *Journal of alloys and compounds* **442**, 122 (2007).
- [675] K. Schubert, S. Bhan, W. Burkhardt, R. Gohle, H. Meissner, M. Pötzschke, and E. Stolz, *Naturwissenschaften* **47**, 303 (1960).
- [676] H. Wang, Y. Zhan, and M. Pang, *Solid State Communications* **152**, 462 (2012).
- [677] Y. Verbovytsky and K. Latka, *Journal of alloys and compounds* **431**, 130 (2007).
- [678] K. Petry, W. Klünter, and W. Jung, *Zeitschrift für Kristallographie* **209**, 151 (1994).
- [679] R. Demchyna, Y. Prots, U. Burkhardt, U. Schwarz, and Y. Grin, *Zeitschrift für Kristallographie-New Crystal Structures* **221**, 427 (2006).
- [680] M. F. Zumdick, R.-D. Hoffmann, and R. Pöttgen, *Zeitschrift für Naturforschung B* **54**, 45 (1999).
- [681] W. Müller, *Zeitschrift für Naturforschung B* **32**, 357 (1977).
- [682] T. Harmening, C. P. Sebastian, L. Zhang, C. Fehse, H. Eckert, and R. Pöttgen, *Solid State Sciences* **10**, 1395 (2008).
- [683] I. Zeiringer, N. Melnychenko-Koblyuk, A. Grytsiv, E. Bauer, G. Giester, and P. Rogl, *Journal of Phase Equilibria Diffusion* **32**, 115 (2011).
- [684] U. Zachwieja, *Journal of alloys and compounds* **196**, 187 (1993).
- [685] H. Klesnar, T. Aselage, B. Morosin, and G. Kwei, *Journal of alloys and compounds* **241**, 180 (1996).
- [686] W. Harms, M. Wendorff, and C. Roehr, *Zeitschrift Fr Naturforschung B* **62**, 177 (2007).



- [687] N. Zhuravlev, N. Esaulov, and I. Rall, *SOV PHYS CRYSTALLOGR* **15**, 315 (1970).
- [688] E. Rudy, F. Benesovsky, H. Nowotny, and L. E. Toth, *Monatshefte Fr Chemie Und Verwandte Teile Anderer Wissenschaften* **92**, 692 (1961).
- [689] P. I. Kripyakevich and E. I. Gladyshevskii, *Soviet Phys.-Cryst.* **6**, 94 (1961).
- [690] A. Zalkin, R. G. Bedford, and D. Sands, *Acta Crystallographica* **12**, 700 (2010).
- [691] F. Laves, *Naturwissenschaften* **31**, 145 (1943).
- [692] W. F. Harms, *Dissertation Universitaet Freiburg/Breisgau* **2008**, 1 (2008).
- [693] J. D. Zhang and X. L. Cheng, *Physica B Physics of Condensed Matter* **405**, 3532 (2010).
- [694] T. Chihi, M. Fatmi, J. Parlebas, and M. Guemmaz, *European Physical Journal Applied Physics* **55**, 57 (2011).
- [695] M. Puselj and Z. Ban, *Journal of The Less-Common Metals* **37**, 213 (1974).
- [696] J. Schoen, M. Wevers, and M. Jansen, *Solid State Sciences* **2**, 449 (2000).
- [697] G. V. Vajenine, X. Wang, I. Efthimiopoulos, S. Karmakar, K. Syassen, and M. Hanfland, *Physical Review B Condensed Matter* **79**, (2009).
- [698] Y. A. Buslaev, G. Safronov, V. Pachomov, M. Glushkova, V. Repko, M. Ershova, A. Zhukov, and T. Zhdanova, *Izvestiya Akademii Nauk SSSR, Neorganicheskie Materialy* **5**, 45 (1969).
- [699] T. Chihi, M. Fatmi, and B. Ghebouli, *Solid State Communications* **151**, 1672 (2011).
- [700] Chihi, Fatmi, Parlebas, J.C, and Guemmaz, *European Physical Journal Applied Physics* **55**, 57 (2011).
- [701] Y. G. Yu and N. L. Ross, *Journal of Physics Condensed Matter* **23**, 055401 (2011).
- [702] L. Gulai, V. Zaremba, Y. M. Kalychak, and N. Koblyuk, *Inorganic materials* **35**, 471 (1999).
- [703] Y.-U. Kwon and J. D. Corbett, *Journal of alloys and compounds* **190**, 219 (1993).
- [704] E. Garcia and J. D. Corbett, *Inorganic Chemistry* **29**, 3274 (1990).
- [705] Y. U. Kwon and J. D. Corbett, *Chemistry of materials* **4**, 1348 (1992).
- [706] H. Boller, H. Nowotny, and A. Wittmann, *Monatshefte für Chemie und verwandte Teile anderer Wissenschaften* **91**, 1174 (1960).
- [707] J. Schuster and J. Bauer, *Journal of nuclear materials* **120**, 133 (1984).
- [708] J. Schuster and H. Nowotny, *Zeitschrift fuer Metallkunde* **71**, 341 (1980).
- [709] L. Edshammar and S. Andersson, *ACTA CHEMICA SCANDINAVICA* **14**, 223 (1960).
- [710] R. Nandedkar and P. Delavignette, *physica status solidi (a)* **73**, K157 (1982).
- [711] Y.-U. Kwon and J. D. Corbett, *Journal of alloys and compounds* **190**, 219 (1993).
- [712] E. Garcia and J. D. Corbett, *Inorganic Chemistry* **29**, 3274 (1990).
- [713] Y. U. Kwon and J. D. Corbett, *Chemistry of materials* **4**, 1348 (1992).
- [714] A. Huetz and G. Nagorsen, *Zeitschrift fuer Metallkunde* **66**, 314 (1975).
- [715] B. Better, A. Hutz, and G. Nagorsen, *Zeitschrift für Metallkunde* **67**, 118 (1976).
- [716] H. Nowotny, F. Benesovsky, E. Rudy, and A. Wittmann, *Monatshefte für Chemie und verwandte Teile anderer Wissenschaften* **91**, 975 (1960).
- [717] Y. U. Kwon and J. D. Corbett, *Chemistry of materials* **4**, 1348 (1992).
- [718] U. Steinbrenner and A. Simon, *Zeitschrift für anorganische und allgemeine Chemie* **624**, 228 (1998).
- [719] B. Eisenmann and K. Deller, *Zeitschrift für Naturforschung B* **30**, 66 (1975).
- [720] B. Eisenmann and K. Deller, *Zeitschrift für Naturforschung B* **30**, 66 (1975).
- [721] E. Garcia and J. D. Corbett, *Inorganic Chemistry* **29**, 3274 (1990).
- [722] Y. U. Kwon and J. D. Corbett, *Chemistry of materials* **4**, 1348 (1992).
- [723] E. A. Leon-Escamilla and J. D. Corbett, *Chemistry of materials* **18**, 4782 (2006).
- [724] Y.-U. Kwon and J. D. Corbett, *Journal of alloys and compounds* **190**, 219 (1993).
- [725] G. Natta, P. Corradini, and G. Allegra, *Journal of Polymer Science* **51**, 399 (1961).
- [726] C. Park, S. W. Kim, and M. Yoon, *Physical review letters* **120**, 026401 (2018).
- [727] J. Watts, *Inorganic Chemistry* **5**, 281 (1966).
- [728] Y. U. Kwon and J. D. Corbett, *Chemistry of materials* **4**, 1348 (1992).
- [729] N. Belyavina and P. Suprunenko, *Phys. Met.(USSR)* **4**, 179 (1982).
- [730] W. Jeitschko, H. Nowotny, and F. Benesovsky, *Monatshefte für Chemie und verwandte Teile anderer Wissenschaften* **94**, 844 (1963).
- [731] O. Schob and E. Parthé, *Acta Crystallographica* **17**, 1335 (1964).
- [732] S. Popova and V. Putro, *INORGANIC MATERIALS* **15**, 947 (1979).
- [733] M. Drys, R. Kubiak, and K. Lukaszewicz, *Bulletin de l'Academie Polonaise des Sciences. Serie des Sciences Chimiques* **21**, 901 (1973).
- [734] K. Schubert, H. Meissner, M. Pötzschke, W. Rossteutscher, and E. Stolz, *Naturwissenschaften* **49**, 57 (1962).
- [735] Y.-U. Kwon and J. D. Corbett, *Journal of alloys and compounds* **190**, 219 (1993).
- [736] W. Jeitschko, H. Nowotny, and F. Benesovsky, *Monatshefte fuer Chemie* **95**, 1242 (1964).
- [737] H. Nowotny, A. W. Searcy, and J. Orr, *The Journal of Physical Chemistry* **60**, 677 (1956).
- [738] J. Arbuckle and E. Parthe, *Acta Crystallographica* **15**, 1205 (1962).
- [739] E. Parthé and J. Norton, *Acta Crystallographica* **11**, 14 (1958).
- [740] E. Parthe, *Acta Crystallographica* **13**, 868 (1960).
- [741] L. F. Dahl, T.-I. Chiang, P. W. Seabaugh, and E. M. Larsen, *Inorganic Chemistry* **3**, 1236 (1964).
- [742] Q. D. Gibson, *Prediction, synthesis and characterization of new topological materials*, Ph.D. thesis, Princeton University (2016).

- [743] W. Rieger and E. Parthé, *Acta Crystallographica Section B: Structural Crystallography and Crystal Chemistry* **24**, 456 (1968).
- [744] O. Karpinsky and B. Evseev, *Izvestiya Akademii Nauk SSSR, Metally* **1969**, 166 (1969).
- [745] W. Rieger, H. Nowotny, and F. Benesovsky, *Monatshefte für Chemie und verwandte Teile anderer Wissenschaften* **96**, 232 (1965).
- [746] G. Brauer and R. Rudolph, *Zeitschrift für anorganische und allgemeine Chemie* **248**, 405 (1941).
- [747] P. Seabaugh and L. Dahl, *American Chemical Society: Abstracts of Papers* **141**, 8M (1962).
- [748] J. Angelkort, A. Senyshyn, A. Schönleber, and S. van Smaalen, *Zeitschrift für Kristallographie Crystalline Materials* **226**, 640 (2011).
- [749] Z. Song, J. Qi, J. Lu, C. Wang, Y. Yang, D. Yu, M.-H. Yung, J. Yang, J. Li, and J. Feng, arXiv preprint arXiv:1712.07696 (2017).
- [750] L. F. Dahl, T.-I. Chiang, P. W. Seabaugh, and E. M. Larsen, *Inorganic Chemistry* **3**, 1236 (1964).
- [751] Y.-U. Kwon and J. D. Corbett, *Journal of alloys and compounds* **190**, 219 (1993).
- [752] A. Benabbas, M. Borel, A. Grandin, A. Leclaire, and B. Raveau, *Acta Crystallographica Section C* **49**, 439 (1993).
- [753] H. Schachner, E. Cerwenka, and H. Nowotny, *Monatshefte fuer Chemie und verwandte Teile anderer Wissenschaften* **85**, 245 (1954).
- [754] Y. U. Kwon and J. D. Corbett, *Chemistry of materials* **4**, 1348 (1992).
- [755] N. Terao, *Journal of the Less Common Metals* **23**, 159 (1971).
- [756] V. Petrunin, N. Sorokin, I. Borovinskaya, and A. Pityulin, *Powder Metallurgy and Metal Ceramics* **19**, 191 (1980).
- [757] R. Horyń and R. Andruszkiewicz, *Journal of the Less Common Metals* **71**, P9 (1980).
- [758] Y. Lomnitskaya and L. Koval', *Zhurnal Neorganicheskoi Khimii* **41**, 1925 (1996).
- [759] E. Parthe, H. Nowotny, and H. Schmid, *Monatshefte für Chemie und verwandte Teile anderer Wissenschaften* **86**, 385 (1955).
- [760] Y.-U. Kwon and J. D. Corbett, *Journal of alloys and compounds* **190**, 219 (1993).
- [761] Y. U. Kwon and J. D. Corbett, *Chemistry of materials* **4**, 1348 (1992).
- [762] G. Brauer, K. Gingerich, and M. Knausenberger, *Angewandte Chemie* **76**, 187 (1964).
- [763] Y.-U. Kwon and J. D. Corbett, *Journal of alloys and compounds* **190**, 219 (1993).
- [764] W. Jeitschko and E. Parthé, *Acta Crystallographica* **19**, 275 (1965).
- [765] W. Jeitschko and E. Parthé, *Acta Crystallographica* **19**, 275 (1965).
- [766] E. Garcia and J. D. Corbett, *Inorganic Chemistry* **29**, 3274 (1990).
- [767] Y. U. Kwon and J. D. Corbett, *Chemistry of materials* **4**, 1348 (1992).
- [768] A. Kozlov and V. Pavlyuk, *Prace Naukowe - Wyzsza Szkola Pedagogiczna Czestochowa, Chemia i Ochrona Srodowiska* **8**, 23 (2004).
- [769] W. M. Hurng and J. D. Corbett, *Chemistry of Materials* **1**, 311 (1989).
- [770] Y. U. Kwon and J. D. Corbett, *Chemistry of materials* **4**, 1348 (1992).
- [771] H. Nowotny, H. Schachner, R. Kieffer, and F. Benesovsky, *Monatshefte für Chemie/Chemical Monthly* **84**, 1 (1953).
- [772] E. Parthe, *Acta Crystallographica* **13**, 868 (1960).
- [773] A. Mewis, *Zeitschrift Fr Naturforschung B* **34**, 1373 (1979).
- [774] A. Mewis, *Zeitschrift Fr Naturforschung B* **33**, 983 (1978).
- [775] F. Merlo, M. Pani, and M. L. Fornasini, *Journal of The Less-Common Metals* **166**, 319 (1990).
- [776] A. Iandelli, *Revue de Chimie Minerale* **24**, 28 (1987).
- [777] F. Merlo, M. Pani, and M. L. Fornasini, *Journal of The Less-Common Metals* **166**, 319 (1990).
- [778] X. Yan, A. Grytsiv, P. Rogl, H. Schmidt, G. Giester, A. Saccone, and X. Q. Chen, *Intermetallics* **17**, 336 (2009).
- [779] A. Iandelli, *Journal of the Less Common Metals* **169**, 187 (1991).
- [780] A. Kverneland, V. Hansen, G. Thorkildsen, H. Larsen, P. Pattison, X.-Z. Li, and J. Gjønnes, *Materials Science Engineering A* **528**, 880 (2011).
- [781] M. Jehle, H. Scherer, M. Wendorff, and C. Roehr, *Cheminform* **182**, 1129 (2009).
- [782] J. Nuss and M. Jansen, *Zeitschrift fuer Anorganische und Allgemeine Chemie (1950) (DE)* **635**, 1514 (2009).
- [783] S. Rundqvist, B. Carlsson, B. Olofsson, and P. H. Nielsen, *Acta Chemica Scandinavica* **22**, 2395 (1968).
- [784] D. Johrendt, *Zeitschrift fuer Naturforschung, B: Chemical Sciences* **51**, 905 (1996).
- [785] G. Wenski and A. Mewis, *Zeitschrift Fr Anorganische Und Allgemeine Chemie* **535**, (2010).
- [786] W. Trzebiatowski, in *Acta Crystallographica (1,1948-23,1967)*, Vol. 10 (1957) pp. 792–793.
- [787] F. Merlo, M. Pani, and M. L. Fornasini, *Journal of The Less-Common Metals* **166**, 319 (1990).
- [788] A. Iandelli, *ChemInform* **18**, 28 (1987).
- [789] J. Nuss and M. Jansen, *Zeitschrift für anorganische und allgemeine Chemie* **635**, 1514 (2009).
- [790] W. Bronger and H. Kathage, *Journal of Alloys Compounds* **184**, 87 (1992).
- [791] U. Zachwieja, *Zeitschrift fuer Anorganische und Allgemeine Chemie (1950) (DE)* **627**, 353 (2001).
- [792] K. J. Range, F. Rau, M. Zabel, W. Bronger, U. Kathage, and G. Auffermann, *Journal of Alloys Compounds* **205**, 271 (1994).
- [793] F. Merlo, M. Pani, and M. L. Fornasini, *Journal of The Less-Common Metals* **166**, 319 (1990).
- [794] O. N. Srivastava and M. M. Srivastava, **63**, 158 (1972).
- [795] S. Stenbeck and A. Westgren, *Zeitschrift Fr Physikalische Chemie* **14b** (2017).
- [796] M. Zhang, H. Wang, H. Wang, T. Cui, and Y. Ma, *Journal of Physical Chemistry C* **114**, 6722 (2010).
- [797] F. Merlo, M. Pani, and M. L. Fornasini, *Journal of Alloys and Compounds* **196**, 145 (1993).

- [798] X.-G. Lu, C.-H. Li, L.-Y. Chen, A.-T. Qiu, and W.-Z. Ding, *Materials Chemistry and Physics* **129**, 718 (2011).
- [799] A. Karpov, J. Nuss, U. Wedig, and M. Jansen, *Cheminform* **126**, 14123 (2004).
- [800] P. C. Donohue and J. F. Weiher, *Journal of Solid State Chemistry* **10**, 142 (1974).
- [801] V. Romaka, M. Falmbigl, A. Grytsiv, and P. Rogl, *Journal of Alloys and Compounds* **585**, 287 (2014).
- [802] A. Iandelli, *Zeitschrift Fr Anorganische Und Allgemeine Chemie* **330**, 221 (1964).
- [803] G. Brauer and E. Zintl, *Zeitschrift fuer Physikalische Chemie, Abteilung B: Chemie der Elementarprozesse, Aufbau der Materie* **37**, 323 (1937).
- [804] Z. Liu, B. Zhou, Y. Zhang, Z. Wang, H. Weng, D. Prabhakaran, S.-K. Mo, Z. Shen, Z. Fang, X. Dai, *et al.*, *Science* **343**, 864 (2014).
- [805] N. Zhuravlev, V. Smirnov, and T. Migazin, *Kristallografiya* **5**, 134 (1960).
- [806] L. Jongen, T. Gloger, J. Beekhuizen, and G. Meyer, *Cheminform* **36**, (2005).
- [807] H. Womelsdorf and H.-J. Meyer, *Zeitschrift fur Kristallographie* **210**, 609 (1995).
- [808] A. Iandelli and A. Palenzona, *Atti della Accademia Nazionale dei Lincei, Classe di Fisiche, Matematiche e Naturali, Rendiconti* **37**, 165 (1964).
- [809] I. Todorov and S. C. Sevov, *Inorganic Chemistry* **45**, 4478 (2006).
- [810] W. Bronger and W. Klemm, *Zeitschrift Fr Anorganische Und Allgemeine Chemie* **319**, (1962).
- [811] E. Zhao, J. Wang, J. Meng, and Z. Wu, *Computational Materials Science* **47**, 1064 (2010).
- [812] F. J. D. Salvo, G. W. H. Jr, L. H. Schwartz, J. M. Voorhoeve, and J. V. Waszczak, *Journal of Chemical Physics* **59**, 1922 (1973).
- [813] K. R. Poeppelmeier, J. D. Corbett, T. P. McMullen, D. R. Torgeson, and R. G. Barnes, *Chemischer Informationsdienst* **11**, 129 (1980).
- [814] G. Meyer and U. Packruhn, *Zeitschrift Fr Anorganische Und Allgemeine Chemie* **524**, 90794 (2010).
- [815] L. Jongen, T. Gloger, J. Beekhuizen, and G. Meyer, *Cheminform* **631**, 582 (2005).
- [816] S. Banumathy and A. K. Singh, *Intermetallics* **19**, 1594 (2011).
- [817] A. Iandelli, *Journal of the Less Common Metals* **169**, 187 (1991).
- [818] S. Popova and V. Putro, *INORGANIC MATERIALS* **15**, 947 (1979).
- [819] F. Yu, J. X. Sun, and T. H. Chen, *Physica B Physics of Condensed Matter* **406**, 1789 (2011).
- [820] D. Music, Z. Sun, and J. M. Schneider, *Phys.rev.b* **71**, 2102 (2005).
- [821] H. F. Franzen and J. Graham, *Zeitschrift Fr Kristallographie* **123**, 133 (1966).
- [822] G. Bruzzone and F. Merlo, *Journal of the Less Common Metals* **35**, 153 (1974).
- [823] Y. Watanabe, *Journal of the Physical Society of Japan* **38**, 141 (1975).
- [824] S. K. Srivastava and B. N. Avasthi, *Journal of Materials Science* **24**, 1919 (1989).
- [825] K. Anderko, *Zeitschrift fuer Metallkunde* **49**, 165 (1958).
- [826] S. Miyazaki, K. Kawashima, T. Ipponjima, M. Fukuma, D. Hyakumura, J. Akimitsu, and M. Yoshikawa, *Journal of the Korean Physical Society* **63**, 475 (2013).
- [827] F. Wang and G. J. Miller, *Inorganic Chemistry* **50**, 7625 (2011).
- [828] T. Yamada, T. Ikeda, R. P. Stoffel, V. L. Deringer, R. Dronskowski, and H. Yamane, *Inorganic chemistry* **53**, 5253 (2014).
- [829] T. Yamada, V. L. Deringer, R. Dronskowski, and H. Yamane, *Cheminform* **43**, 4810 (2012).
- [830] F. Yu, J. X. Sun, W. Yang, R. G. Tian, and G. F. Ji, *Solid State Communications* **150**, 620 (2010).
- [831] F. Yu, J. X. Sun, and T. H. Chen, *Physica B Physics of Condensed Matter* **406**, 1789 (2011).
- [832] E. Zhao, J. Wang, J. Meng, and Z. Wu, *Computational Materials Science* **47**, 1064 (2010).
- [833] M. Rabah, D. Rached, R. Khenata, N. Moulay, and A. Zenati, *Solid State Communications* **149**, 941 (2009).
- [834] G. Soto, *Computational Materials Science* **61**, 1 (2012).
- [835] F. Wang and G. J. Miller, *Inorganic Chemistry* **50**, 7625 (2011).
- [836] W. P. F. A. M. Omloo and F. Jellinek, *Journal of The Less-Common Metals* **20**, 121 (1970).
- [837] M. Julien-Pouzol, S. Jaulmes, M. Guittard, and P. Laruelle, *Journal of Solid State Chemistry* **26**, 185 (1978).
- [838] H. Boller, *Monatshefte Fr Chemie* **104**, 166 (1973).
- [839] H. Boller, *Monatshefte Fr Chemie* **104**, 166 (1973).
- [840] T. Lundstroem and P. Snell, *Acta Chemica Scandinavica* **21**, 1343 (1967).
- [841] F. Merlo, M. Pani, and M. L. Fornasini, *Journal of the Less-Common Metals* **171**, 329 (1991).
- [842] W. S. Kim, G. Y. Chao, and L. J. Cabri, *Journal of The Less-Common Metals* **162**, 61 (1990).
- [843] J. Q. Hu, M. Xie, Y. Pan, Y. C. Yang, M. M. Liu, and J. M. Zhang, *Computational Materials Science* **51**, 1 (2012).
- [844] E. Prokin, Z. Ershova, and E. Ermolaev, *Radiokhimiya* **19**, 845 (1977).
- [845] R. Eppinga and G. A. Wiegiers, *Physica B+c* **99**, 121 (1980).
- [846] A. Kjekshus, F. Gronvold, and J. Thorbjornsen, *Acta Chemica Scandinavica (1-27,1973-42,1988)* **16**, 1493 (1962).
- [847] M. Julien-Pouzol, S. Jaulmes, M. Guittard, and P. Laruelle, *Journal of Solid State Chemistry* **26**, 185 (1978).
- [848] A. Iandelli, *Zeitschrift Fr Anorganische Und Allgemeine Chemie* **330**, 221 (1964).
- [849] F. Peng, Q. Liu, H. Fu, and X. Yang, *Solid State Communications* **149**, 56 (2009).
- [850] L. Misch, *Metallwirtschaft, Metallwissenschaft, Metalltechnik* **15**, 163 (1936).
- [851] M. Zhang, H. Yan, G. Zhang, Q. Wei, and H. Wang, *Solid State Communications* **152**, 1030 (2012).
- [852] G. Soto, *Computational Materials Science, Elsevier* **61**, 1 (2012).
- [853] V. V. Bannikov, I. Shein, and A. Ivanovskii, *Physica Status Solidi B - Basic Solid State Physics* **248**, 1369 (2011).
- [854] T. Johrendt and A. Mewis, *Journal of Alloys and Compounds* **183**, 210 (1992).

- [855] J. Crain, R. Piltz, G. Ackland, S. Clark, M. Payne, V. Milman, J. Lin, P. Hatton, and Y. Nam, *Physical Review B* **50**, 8389 (1994).
- [856] H. Pauly, A. Weiss, and H. Witte, *Z METALLKUNDE* **59**, 47 (1968).
- [857] H. Lin, T. Das, Y. J. Wang, L. Wray, S.-Y. Xu, M. Hasan, and A. Bansil, *Physical Review B* **87**, 121202 (2013).
- [858] M. J. Kirkham, A. M. Dos Santos, C. J. Rawn, E. Laracurzio, J. W. Sharp, and A. J. Thompson, *Physical Review B* **85**, 4506 (2012).
- [859] M. Mbarki, R. Alaya, and A. Rebey, *Solid State Communications* **155**, 12 (2013).
- [860] S. Massidda, A. Continenza, A. J. Freeman, T. M. de Pascale, F. Meloni, and M. Serra, *Physical Review B Condensed Matter* **41**, 12079 (1990).
- [861] M. Schowalter, A. Rosenauer, and K. Volz, *Acta Crystallographica Section A Foundations of Crystallography* **68**, 319 (2012).
- [862] L. S. Xie, L. M. Schoop, S. A. Medvedev, C. Felser, and R. J. Cava, *Cheminform* **45**, 6 (2014).
- [863] H. Pauly, A. Weiss, and H. Witte, *Z METALLKUNDE* **59**, 47 (1968).
- [864] U. Eberz, W. Seelentag, and H. U. Schuster, *Zeitschrift Fr Naturforschung B* **35**, 1341 (1980).
- [865] R. Marazza, D. Rossi, and R. Ferro, *Journal of the Less Common Metals* **138**, 189 (1988).
- [866] H. Huang, J. Liu, and W. Duan, *Physical Review B* **90**, 195105 (2014).
- [867] H. Nowotny and F. Holub, *Monatshefte Fr Chemie Und Verwandte Teile Anderer Wissenschaften* **91**, 877 (1960).
- [868] K. Kuriyama, M. Yahagi, and K. Iwamura, *Japanese Journal of Applied Physics* **12**, 743 (1973).
- [869] R. Matthes and H. U. Schuster, *Zeitschrift Fr Naturforschung B* **35**, 778 (1980).
- [870] W. G. Witteman, A. L. Giorgi, and D. T. Vier, *Journal of Physical Chemistry* **64**, 434 (1960).
- [871] M. E. Straumanis and C. D. Kim, *Journal of Applied Physics* **36**, 3822 (1965).
- [872] H. U. Schuster and W. Bockelmann, *Zeitschrift Fr Naturforschung B* **24**, 1189 (1969).
- [873] Q. L. Fang, J. M. Zhang, and K. W. Xu, *Journal of Magnetism and Magnetic Materials* **349**, 104 (2014).
- [874] D. A. Miranda, S. López-Rivera, C. Power, J. Henao, and M. Macías, *MRS Online Proceedings Library Archive* **1372** (2012).
- [875] M. Schowalter, A. Rosenauer, and K. Volz, *Acta Crystallographica Section A: Foundations of Crystallography* **68**, 319 (2012).
- [876] W. F. D. Jong, *Zeitschrift fr Kristallographie - Crystalline Materials* **63**, 466 (1926).
- [877] J. Drews, U. Eberz, and H. U. Schuster, *Journal of the Less Common Metals* **116**, 271 (1986).
- [878] P. Pandit and S. P. Sanyal, in *AIP Conference Proceedings*, Vol. 1349 (AIP, 2011) pp. 855–856.
- [879] W. G. Witteman, A. L. Giorgi, and D. T. Vier, *Journal of Physical Chemistry* **64**, 434 (1960).
- [880] J. Yang and F. Gao, *Physica B, Condensed Matter* **407**, 3527 (2012).
- [881] W. Thronberens and H.-U. Schuster, *Zeitschrift für Naturforschung B* **34**, 781 (1979).
- [882] G. K. Madsen, B. B. Iversen, P. Blaha, and K. Schwarz, *Physical Review B* **64**, 195102 (2001).
- [883] G. Madsen, C. Gatti, B. Iversen, L. Damjanovic, G. Stucky, and V. Srdanov, *Physical Review B* **59**, 12359 (1999).
- [884] A. T. Aldred, *Trans.met.soc.aime* **224**, 1082 (1962).
- [885] A. Sekkal, A. Benzair, T. Ouahrani, H. Faraoun, G. Merad, H. Aourag, and C. Esling, *Intermetallics* **45**, 65 (2014).
- [886] C. Y. Chen and N. A. Crouch, *Canadian Journal of Chemistry* **48**, 1703 (1970).
- [887] J. C. Schuster and J. Bauer, *Journal of Solid State Chemistry* **53**, 260 (1984).
- [888] B. Rakshit, S. P. Sanyal, and M. Celino, *Solid State Communications* **149**, 1326 (2009).
- [889] A. Hao, X. Yang, X. Wang, R. Yu, X. Liu, W. Xin, and R. Liu, *Computational Materials Science* **48**, 59 (2010).
- [890] S. S. Chouhan, G. Pagare, M. Rajagopalan, and S. P. Sanyal, *Solid State Sciences* **14**, 1004 (2012).
- [891] G. Kienast and J. Verma, *Zeitschrift fuer Anorganische und Allgemeine Chemie* (1950) (DE) **310**, 143 (1961).
- [892] K. Haddadi, A. Bouhemadou, and L. Louail, *Journal of Alloys Compounds* **504**, 296 (2010).
- [893] T. Yao, Y. Wang, H. Li, J. Lian, J. Zhang, and H. Gou, *Physica B Condensed Matter* **431**, 58 (2013).
- [894] R. Ferro, *Acta Crystallographica* **7**, 781 (1954).
- [895] E. Biehl and H. J. Deiseroth, *Zeitschrift Fr Anorganische Und Allgemeine Chemie* **625**, 1073 (2015).
- [896] U. E. Musanke and W. Jeitschko, *Zeitschrift Fr Naturforschung B* **22**, 1177 (1991).
- [897] J.-T. Zhao, Z.-C. Dong, J. Vaughey, J. E. Ostenson, and J. D. Corbett, *Journal of alloys and compounds* **230**, 1 (1995).
- [898] W. Jeitschko, H. Nowotny, and F. Benesovsky, *Monatshefte Fr Chemie Und Verwandte Teile Anderer Wissenschaften* **95**, 1040 (1964).
- [899] C. Hu, F. Wang, and Z. Zheng, *Physica B Condensed Matter* **407**, 3398 (2012).
- [900] H. Olijnyk and W. Holzappel, *Physics Letters A* **100**, 191 (1984).
- [901] H. Zimmer, H. Winzen, and K. Syassen, *Physical Review B* **32**, 4066 (1985).
- [902] R. Niewa, W. Schnelle, and F. R. Wagner, *Zeitschrift Fr Anorganische Und Allgemeine Chemie* **627**, 365 (2015).
- [903] Y. H. Duan, Y. Sun, M. J. Peng, and S. G. Zhou, *Journal of Alloys Compounds* **595**, 14 (2014).
- [904] R. Ferro, *Acta Crystallographica* **7**, 781 (1954).
- [905] E. Herlinger, *Angewandte Chemie* **42**, 797 (2010).
- [906] W. Xing, X. Q. Chen, D. Li, Y. Li, C. L. Fu, S. V. Meschel, and X. Ding, *Intermetallics* **28**, 16 (2012).
- [907] W. Jeitschko, H. Nowotny, and F. Benesovsky, *Monatshefte für Chemie und verwandte Teile anderer Wissenschaften* **95**, 436 (1964).
- [908] H. Holleck, *Journal of the Less Common Metals* **52**, 167 (1977).
- [909] S. P. Yatsenko, A. A. Semyannikov, H. O. Shkarov, and E. G. Fedorova, *Journal of the Less Common Metals* **90**, 95 (1983).

- [910] H. Nowotny, *Zeitschrift fuer Metallkunde* **34**, 247 (1942).
- [911] G. Liu, X. Zhao, and H. A. Eick, *Cheminform* **23**, 145 (1992).
- [912] A. Srivastava, M. Chauhan, and R. K. Singh, *Physica Status Solidi* **248**, 2793 (2011).
- [913] A. Maachou, B. Amrani, and M. Driz, *Physica B Condensed Matter* **388**, 384 (2007).
- [914] A. Hao, X. Yang, X. Wang, R. Yu, X. Liu, W. Xin, and R. Liu, *Computational Materials Science* **48**, 59 (2010).
- [915] H. Nowotny, K. Schubert, and U. Dettinger, *Zeitschrift fuer Metallkunde* **37**, 137 (1946).
- [916] S. H. Oh and H. M. Jang, *Journal of the American Ceramic Society* **82**, 233 (1999).
- [917] J. Q. Hu, M. Xie, Y. Pan, Y. C. Yang, M. M. Liu, and J. M. Zhang, *Computational Materials Science* **51**, 1 (2012).
- [918] X. Q. Chen, C. L. Fu, and J. R. Morris, *Intermetallics* **18**, 998 (2010).
- [919] W. Xing, X. Q. Chen, D. Li, Y. Li, C. L. Fu, S. V. Meschel, and X. Ding, *Intermetallics* **28**, 16 (2012).
- [920] H. C. Donkersloot and J. H. N. V. Vucht, *Journal of The Less-Common Metals* **20**, 83 (1970).
- [921] A. Raman and K. Schubert, *Z. Metallk* **55**, 704 (1964).
- [922] W. Xing, X. Q. Chen, D. Li, Y. Li, C. L. Fu, S. V. Meschel, and X. Ding, *Intermetallics* **28**, 16 (2012).
- [923] *Zeitschrift Fr Physikalische Chemie* **127**, 113 (1927).
- [924] A. Hao, X. Yang, X. Wang, R. Yu, X. Liu, W. Xin, and R. Liu, *Computational Materials Science* **48**, 59 (2010).
- [925] G. B. Demishev, S. S. Kabalkina, and T. N. Kolobyanina, *Physica Status Solidi* **108**, 89 (1988).
- [926] H. Samata, S. Tanaka, S. Mizusaki, Y. Nagata, T. C. Ozawa, A. Sato, and K. Kosuda, *Journal of Crystallization Process and Technology* **2**, 16 (2012).
- [927] O. Muller and R. Roy, *Advan. Chem. Ser* **98**, 28 (1971).
- [928] D. A. Keszler, J. A. Ibers, and M. H. Mueller, *Journal of the Chemical Society, Dalton Transactions* **1985**, 2369 (1985).
- [929] A. Junod, R. Flukiger, and J. Muller, *Journal of Physics and Chemistry of Solids* **37**, 27 (1976).
- [930] P. Norby, R. Dinnebier, and A. Fitch, *Inorganic chemistry* **41**, 3628 (2002).
- [931] A. Ferrari, *Gazzetta Chimica Italiana* **67**, 94 (1937).
- [932] A. Dwight and C. Kimball, *Journal of the Less Common Metals* **127**, 179 (1987).
- [933] R. Galera, J. Pierre, E. Siaud, and A. Murani, *Journal of the Less Common Metals* **97**, 151 (1984).
- [934] J. C. Jamieson, *Science* **139**, 762 (1963).
- [935] H. Yana, Q. Weib, S. Changc, and P. Guod, *Acta Physica Polonica, A* **119**, 442 (2011).
- [936] D. Sands, D. Wood, and W. Ramsey, *Acta Crystallographica* **16**, 316 (1963).
- [937] Y.-Q. Zheng, K. Peters, and H. Von Schnering, *Zeitschrift fur Kristallographie* **212**, 55 (1997).
- [938] B. Wang, Y. Liu, Y. Liu, and J.-W. Ye, *Physica B: Condensed Matter* **407**, 2542 (2012).
- [939] Z. Fu and W. Li, *Science in China Series A-Mathematics* **39**, 981 (1996).
- [940] H.-U. Schuster, *Naturwissenschaften* **53**, 360 (1966).
- [941] B. Hu, P. Wang, Y. Xiao, and L.-P. Song, *Zeitschrift für Kristallographie-New Crystal Structures* **220**, 298 (2005).
- [942] P. Wang, W. Xu, and Y.-Q. Zheng, *Zeitschrift für Kristallographie-New Crystal Structures* **218**, 25 (2003).
- [943] A. Edwards, R. Peacock, and A. Said, *JOURNAL OF THE CHEMICAL SOCIETY* **1962**, 4643 (1962).
- [944] W. Xu and Y.-Q. Zheng, *Zeitschrift für Kristallographie-New Crystal Structures* **220**, 323 (2005).
- [945] J. Beck and M. Hengstmann, *Zeitschrift für anorganische und allgemeine Chemie* **624**, 1943 (1998).
- [946] P. Wang, W. Xu, and Y.-Q. Zheng, *Zeitschrift für Kristallographie-New Crystal Structures* **217**, 301 (2002).
- [947] Y.-Q. Zheng, J. Nuss, and H. Von Schnering, *Zeitschrift für Kristallographie-New Crystal Structures* **213**, 500 (1998).
- [948] T. Endo, N. Morita, T. Sato, and M. Shimada, *Veroeffentlichung des Forschungsbereichs der Geo-Kosmoswissenschaften. 17 (High Pressure Geosci. Mater. Synth.)* **1988**, 185 (1988).
- [949] R. Schmidt, M. Kraus, and B. Mueller, *Zeitschrift fuer Anorganische und Allgemeine Chemie* **627**, 2344 (2001).
- [950] A. Dwight and C. Kimball, *Journal of the Less Common Metals* **127**, 179 (1987).
- [951] H.-U. Schuster, *Naturwissenschaften* **53**, 360 (1966).
- [952] C.-J. Kistrup and H.-U. Schuster, *Zeitschrift für anorganische und allgemeine Chemie* **410**, 113 (1974).
- [953] H. SCHONEMANN and H. SCHUSTER, *REVUE DE CHIMIE MINERALE* **13**, 32 (1976).
- [954] J. Häglund, A. F. Guillermet, G. Grimvall, and M. Körling, *Physical Review B* **48**, 11685 (1993).
- [955] W. Witteman, A. Giorgi, and D. Vier, *The Journal of Physical Chemistry* **64**, 434 (1960).
- [956] V. Vanyarkho, V. Zlomanov, and A. Novoselova, *Inorganic Materials* **3**, 1127 (1967).
- [957] B. Lombos, B. Ghicopoulos, S. Bhattacharya, and B. Pant, *Canadian Journal of Physics* **54**, 48 (1976).
- [958] F. Kubel, M. Pantazi, N. Wandl, and H. Hagemann, *Zeitschrift für anorganische und allgemeine Chemie* **640**, 3184 (2014).
- [959] W. López-Pérez, N. Simon-Olivera, J. Molina-Coronell, A. González-García, and R. González-Hernández, *Journal of Alloys and Compounds* **574**, 124 (2013).
- [960] J. Wernick, G. Hull, T. Geballe, J. Bernardini, and J. Waszczak, *Materials Letters* **2**, 90 (1983).
- [961] A. Dwight and C. Kimball, *Journal of the Less Common Metals* **127**, 179 (1987).
- [962] C. Rooymans, *Physics Letters* **4**, 186 (1963).
- [963] W. Ramsey, *Acta Crystallographica* **14**, 1091 (1961).
- [964] H.-U. Schuster, *Naturwissenschaften* **53**, 360 (1966).
- [965] J. Stöhr and H. Schäfer, *Zeitschrift für Naturforschung B* **34**, 653 (1979).
- [966] G. Brauer and J. Tiesler, *Zeitschrift für anorganische Chemie* **262**, 319 (1950).
- [967] J. Häglund, A. F. Guillermet, G. Grimvall, and M. Körling, *Physical Review B* **48**, 11685 (1993).
- [968] J. Kumar and R. Saxena, *Journal of the Less Common Metals* **147**, 59 (1989).
- [969] M. Banus, T. Reed, and A. Strauss, *Physical Review B* **5**, 2775 (1972).

- [970] N. Schonberg, *Acta Chemica Scandinavica* **8**, 627 (1954).
- [971] X.-s. Yan, P. Lin, X. Qi, and L. Yang, *International Journal of Materials Research* **102**, 381 (2011).
- [972] G. Corbel, M. Topić, A. Gibaud, and C. I. Lang, *Journal of Alloys and Compounds* **509**, 6532 (2011).
- [973] X.-Q. Wang and J.-T. Wang, *Solid State Communications* **150**, 1715 (2010).
- [974] J. Häglund, A. F. Guillermet, G. Grimvall, and M. Körling, *Physical Review B* **48**, 11685 (1993).
- [975] A. Meenaatci, R. Rajeswarapalanichamy, and K. Iyakutti, *Phase Transition* **86**, 570 (2013).
- [976] O. Winkler, *Zeitschrift fuer Metallkunde* **30**, 162 (1938).
- [977] G. Kienast, J. Verma, and W. Klemm, *Zeitschrift Fuer Anorganische Und Allgemeine Chemie* **310**, 143 (2010).
- [978] Y. Ö. Çiftci, K. Çolakoglu, E. Deligöz, and Ü. Bayhan, *Journal of Materials Science & Technology* **28**, 155 (2012).
- [979] H. Ozisik, K. Colakoglu, E. Deligoz, and H. Ozisik, *Solid State Communications* **151**, 1349 (2011).
- [980] B. L. And and J. D. Corbett, *Inorganic Chemistry* **44**, 6515 (2005).
- [981] T. Jurriaanse, *Zeitschrift fr Kristallographie - Crystalline Materials* **90**, 322 (1935).
- [982] U. Zachwieja, *Journal of Alloys and Compounds* **196**, 171 (1993).
- [983] H. G. Perltz, *The Structure of the Intermetallic Compound Au<sub>2</sub>Pb* (K. Mattieseni trikikoda o.-ü., 1934).
- [984] E. avitskii, V. Polyakova, and E. Khorlin, *Russian Metallurgy* **1971**, 107 (1971).
- [985] M. Stuemke and G. Petzow, *Zeitschrift fuer Metallkunde* **66**, 292 (1975).
- [986] A. Zalkin, D. E. Sands, R. G. Bedford, and O. H. Krikorian, *Acta Crystallographica* **14**, 63C65 (1961).
- [987] F. Emmerling, N. Laengin, D. Petri, M. Kroecker, and C. Roehr, *Zeitschrift Fr Anorganische Und Allgemeine Chemie* **630**, 171 (2004).
- [988] W. Jeitschko, H. Holleck, H. Nowotny, and F. Benesovsky, *Monatshefte Fr Chemie Und Verwandte Teile Anderer Wissenschaften* **95**, 1004 (1964).
- [989] D. Fischer and M. J. Dr, *Zeitschrift Fr Anorganische Und Allgemeine Chemie* **629**, 1934C1936 (2003).
- [990] E. A. Wood and V. B. Compton, *Acta Crystallographica* **11**, 429C433 (1958).
- [991] W. Bronger and W. Klemm, *Zeitschrift Fr Anorganische Und Allgemeine Chemie* **319**, 58 (1962).
- [992] E. Zintl and A. Schneider, *Zeitschrift Fr Elektrochemie Und Angewandte Physikalische Chemie* **41**, 294C297 (1935).
- [993] S. Bobev and S. C. Sevov, *Journal of Solid State Chemistry* **153**, 92 (2000).
- [994] R. J. Cava, R. S. Roth, T. Siegrist, B. Hessen, J. J. Krajewski, and W. F. P. Jr, *Journal of Solid State Chemistry* **103**, 359 (1993).
- [995] A. Haas, H. J. Kutsch, and C. Krger, *European Journal of Inorganic Chemistry* **120**, 1045 (1987).
- [996] B. Böhme, M. Reibold, G. Auffermann, H. Lichte, M. Baitinger, and Y. Grin, *Zeitschrift für Kristallographie-Crystalline Materials* **229**, 677 (2014).
- [997] R. P. Elliott, *Trans.am.soc.metals* **53**, 321 (1961).
- [998] Z. Blazina and Z. Ban, *Journal of the Less Common Metals* **90**, 223 (1983).
- [999] M. Dalton and M. Kurmoo, *Synthetic Metals* **71**, 1623 (1995).
- [1000] C. P. Nash, F. M. Boyden, and L. D. Whittig, *Journal of the American Chemical Society* **82**, 89 (1960).
- [1001] E. Zintl and A. Schneider, *Zeitschrift Fr Elektrochemie Berichte Der Bunsengesellschaft Fr Physikalische Chemie* **41**, 764 (2015).
- [1002] K. N. Semenenko, V. N. Verbetskii, S. V. Mitrokhin, and V. V. Burnasheva, *Russian Journal of Inorganic Chemistry* **25**, 961 (1980).
- [1003] K. J. Range, F. Rau, and U. Klement, *Acta Crystallographica* **45**, 1069C1070 (1989).
- [1004] S. Bobev and S. C. Sevov, *Journal of Solid State Chemistry* **153**, 92 (2000).
- [1005] E. A. Wood and V. B. Compton, *Acta Crystallographica* **11**, 429 (1958).
- [1006] T. H. Geballe, B. T. Matthias, V. B. Compton, E. Corenzwit, G. W. H. Jr, and L. D. Longinotti, *Physical Review* **137**, 119 (1965).
- [1007] B. Eisenmann and J. Klein, *Zeitschrift Fr Naturforschung B* **43**, 1156 (1988).
- [1008] ElliottR.P. and RostokerW, *Transactions of the American Society for Metals* **50**, 617 (1958).
- [1009] H. Olijnyk and W. Holzappel, *Physics Letters A* **100**, 191 (1984).
- [1010] P. Romans, O. Paasche, and H. Kato, *J. Less-Common Metals* **8**, 213 (1965).
- [1011] D. McWhan and A. Jayaraman, *Applied Physics Letters* **3**, 129 (1963).
- [1012] B. Levinger, *Journal of Metals* **5**, 195 (1953).
- [1013] N. German, A. Bakanova, L. Tarasova, and Y. Sumulov, *Fizika Tverdogo Tela (Leningrad) (= Solid State Physics)* **12**, 637 (1970).
